# Supplementary material for: A long-read RNA-seq approach to identify novel transcripts of very large genes
Source: HighWire-hosted journal article supplement (doi:10.1101/gr.259903.119), 2020-06-01

# ExPhaser

Program for Determining phasing of isoform defining exons

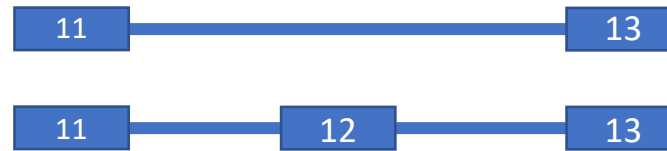

Brian Uapinyoying

Hoffman lab

8/6/2019

# Introduction

- PacBio's long-read isoform sequencing data spans multiple exons (10kb+)
- This allows for phasing of exons when analyzing RNA-Seq data
- But some transcripts are too long > 10 kb (e.g. Ttn at 106 kb)
- We successfully used an exon-based approach (ExCOVator) and internal priming to determine differential usage between tissues in ultra long transcripts
- However, without phasing data we cannot determine the splicing pattern of these differentially used exons within individual transcripts from each tissue

# Why is phasing of exons important?

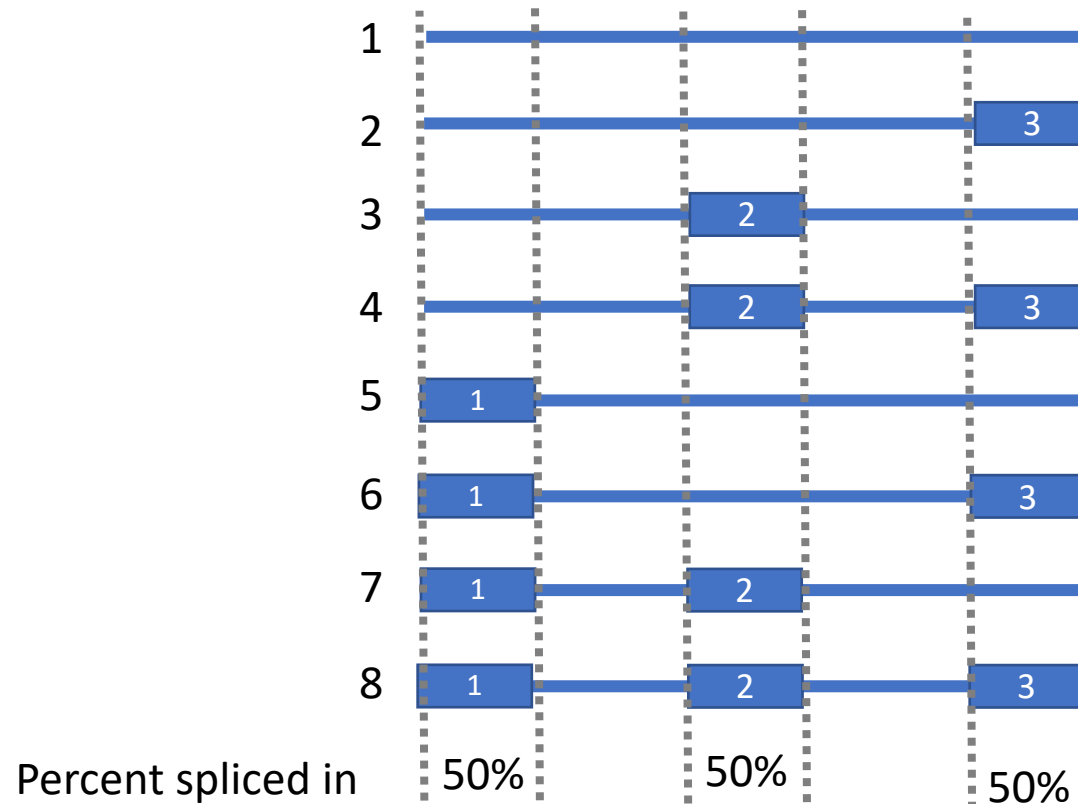

- Without phasing data, all 3 exons (independently) look like they are similarly expressed when they could be part of different transcript isoforms

# General Implementation

- Use the python library HT-Seq
  - <https://www.ncbi.nlm.nih.gov/pubmed/25260700>
- Select key exons / isoform defining cassette exons
  - input into script as bed file (genomic coordinates)
- Loop through each IsoSeq read from sample bam files
  - Determine if the read is long enough to cover all key input exons
    - Filter out reads that are too short
  - Check if exons in the read match any of the key input exons & note splice pattern
  - Tally up all the reads for each splice pattern and output as data table/file

# What are all the possible splicing patterns with a given number of exons?

- Formula =  $2^{(\text{\#exons})}$
- For 3 exons,  $2^3 = 8$  total splicing possibilities or 8 rows of information
- Each row (i) can be seen as binary representation of [row number – 1]

Number of rows =  $2^{(\text{\#exons})}$

(row# – 1)

| Row # | Binary |
|-------|--------|
| 0     | 000    |
| 1     | 001    |
| 2     | 010    |
| 3     | 011    |
| 4     | 100    |
| 5     | 101    |
| 6     | 110    |
| 7     | 111    |

Split into Binary table

| Exon 1 | Exon 2 | Exon 3 |
|--------|--------|--------|
| 0      | 0      | 0      |
| 0      | 0      | 1      |
| 0      | 1      | 0      |
| 0      | 1      | 1      |
| 1      | 0      | 0      |
| 1      | 0      | 1      |
| 1      | 1      | 0      |
| 1      | 1      | 1      |

Convert to Boolean values  
(Exon Spliced in? True/False)

| Pattern | Exon 1 | Exon 2 | Exon 3 |
|---------|--------|--------|--------|
| 1       | False  | False  | False  |
| 2       | False  | False  | True   |
| 3       | False  | True   | False  |
| 4       | False  | True   | True   |
| 5       | True   | False  | False  |
| 6       | True   | False  | True   |
| 7       | True   | True   | False  |
| 8       | True   | True   | True   |

Not all possible patterns will exist due to constitutively expressed exons

**Hypothetical Example: NRAP Soleus**

Likely only a subset of the total possibilities will be seen in the data, the rest may be artifacts

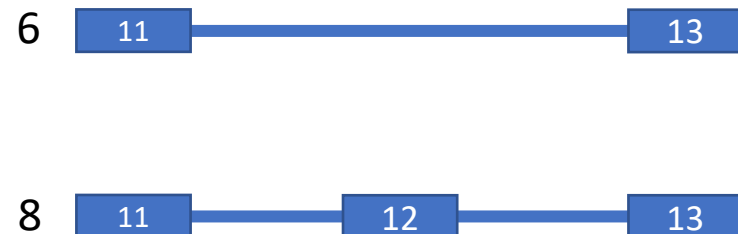

| Pattern | Exon 11 | Exon 12 | Exon 13 | FL_count | %  |
|---------|---------|---------|---------|----------|----|
| 1       | False   | False   | False   | 2        | 0  |
| 2       | False   | False   | True    | 5        | 0  |
| 3       | False   | True    | False   | 0        | 0  |
| 4       | False   | True    | True    | 1        | 0  |
| 5       | True    | False   | False   | 0        | 0  |
| 6       | True    | False   | True    | 1500     | 30 |
| 7       | True    | True    | False   | 0        |    |
| 8       | True    | True    | True    | 3500     | 70 |

Technically, we also do not have to limit ourselves to adjacent (neighboring) exons as long as the reads are long enough to contain all exons

- If we know which exons are variably spliced (output from my exCOVator script), we can strategically select these key exons for phase analysis
- Then determine presence/absence of input exons relative to each other within each read
- This same approach can be done for transcript annotations!
- However, the longer the distance (interval range) between the first and last key exon, the fewer reads will contain all key exons

| Pattern | Exon 9 | Exon 17 | Exon 47 |
|---------|--------|---------|---------|
| 1       | False  | False   | False   |
| 2       | False  | False   | True    |
| 3       | False  | True    | False   |
| 4       | False  | True    | True    |
| 5       | True   | False   | False   |
| 6       | True   | False   | True    |
| 7       | True   | True    | False   |
| 8       | True   | True    | True    |

Only reads and transcript annotations that **contain** the bed/exon interval range are selected for determining and quantifying splicing patterns

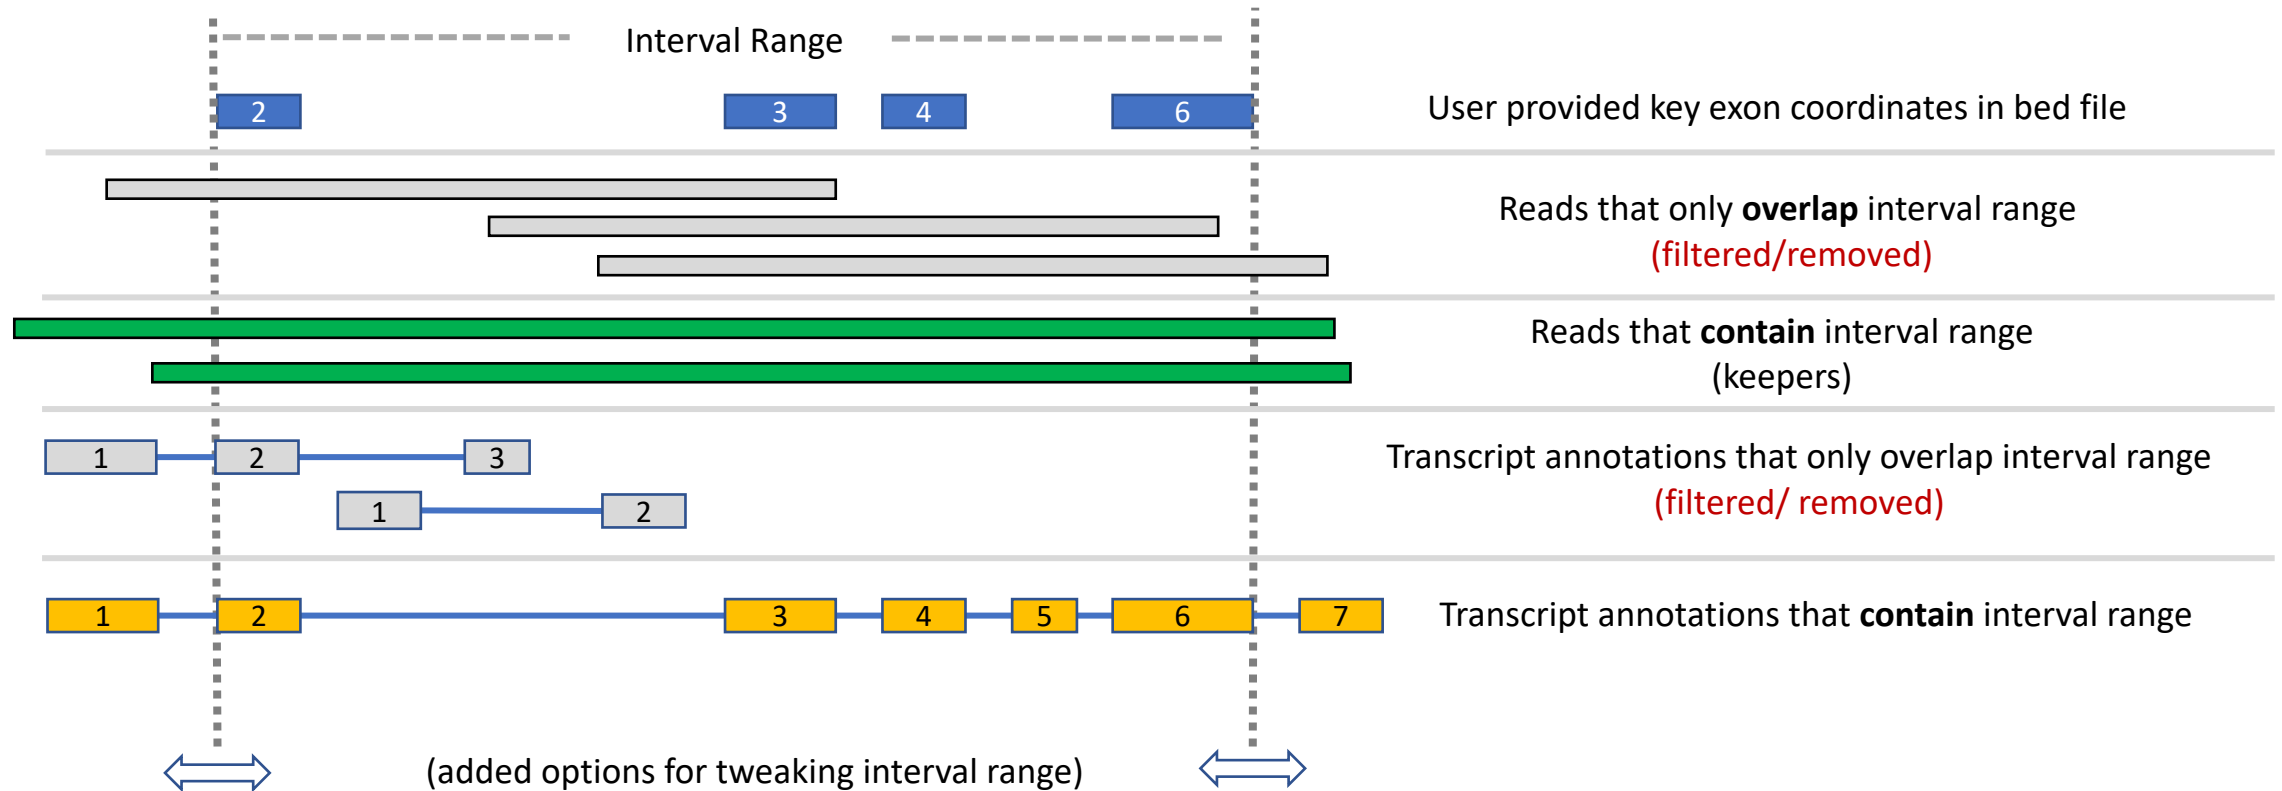

- Interval range is calculated using the start site of the lowest coordinate exon and the end site of the highest coordinate exon
- Therefore, the farther the first and last exons are the fewer reads will contain the interval range
- Reads that overlap vs contain the interval range is output to a data file for the user



We can also use this same approach to determine which pattern is associated with which annotated transcripts

| Isoform | Exon 9 | Exon 17 | Exon 47 | Annotation        |
|---------|--------|---------|---------|-------------------|
| 1       | False  | False   | False   | ?                 |
| 2       | False  | False   | True    | NM_XX3            |
| 3       | False  | True    | False   | ?                 |
| 4       | False  | True    | True    | ?                 |
| 5       | True   | False   | False   | ?                 |
| 6       | True   | False   | True    | NM_XX2            |
| 7       | True   | True    | False   | ?                 |
| 8       | True   | True    | True    | NM_XX1,<br>NM_XX4 |

Most patterns won't be annotated or exist

Some patterns may match multiple transcript annotations

Finally, we can combine all three pieces of data (pattern, annotation, read count) and filter out patterns with no reads in any sample and with no annotation found

All  
patterns

| Isoform | Exon 9 | Exon 17 | Exon 47 | Annotation        | Cardiac<br>Read count | EDL<br>Read count | Soleus<br>Read count |
|---------|--------|---------|---------|-------------------|-----------------------|-------------------|----------------------|
| 1       | False  | False   | False   | ?                 | 0                     | 0                 | 0                    |
| 2       | False  | False   | True    | NM_XX3            | 100                   | 700               | 300                  |
| 3       | False  | True    | False   | ?                 | 2                     | 0                 | 0                    |
| 4       | False  | True    | True    | ?                 | 0                     | 250               | 0                    |
| 5       | True   | False   | False   | ?                 | 0                     | 0                 | 0                    |
| 6       | True   | False   | True    | NM_XX2            | 30                    | 0                 | 900                  |
| 7       | True   | True    | False   | ?                 | 0                     | 0                 | 0                    |
| 8       | True   | True    | True    | NM_XX1,<br>NM_XX4 | 500                   | 0                 | 40                   |

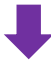

Selected  
patterns

| Isoform | Exon 9 | Exon 17 | Exon 47 | Annotation        | Cardiac<br>Read count | EDL<br>Read count | Soleus<br>Read count |
|---------|--------|---------|---------|-------------------|-----------------------|-------------------|----------------------|
| 2       | False  | False   | True    | NM_XX3            | 100                   | 700               | 300                  |
| 3       | False  | True    | False   | ?                 | 2                     | 0                 | 0                    |
| 4       | False  | True    | True    | ?                 | 0                     | 250               | 0                    |
| 6       | True   | False   | True    | NM_XX2            | 30                    | 0                 | 900                  |
| 8       | True   | True    | True    | NM_XX1,<br>NM_XX4 | 500                   | 0                 | 40                   |

Artifact or very rare transcript?

Potential novel isoforms

Not enough data to distinguish the two isoforms

# Pilot Analysis: Nrap transcript expression between Cardiac, EDL and Soleus using Gencode mm10 annotations

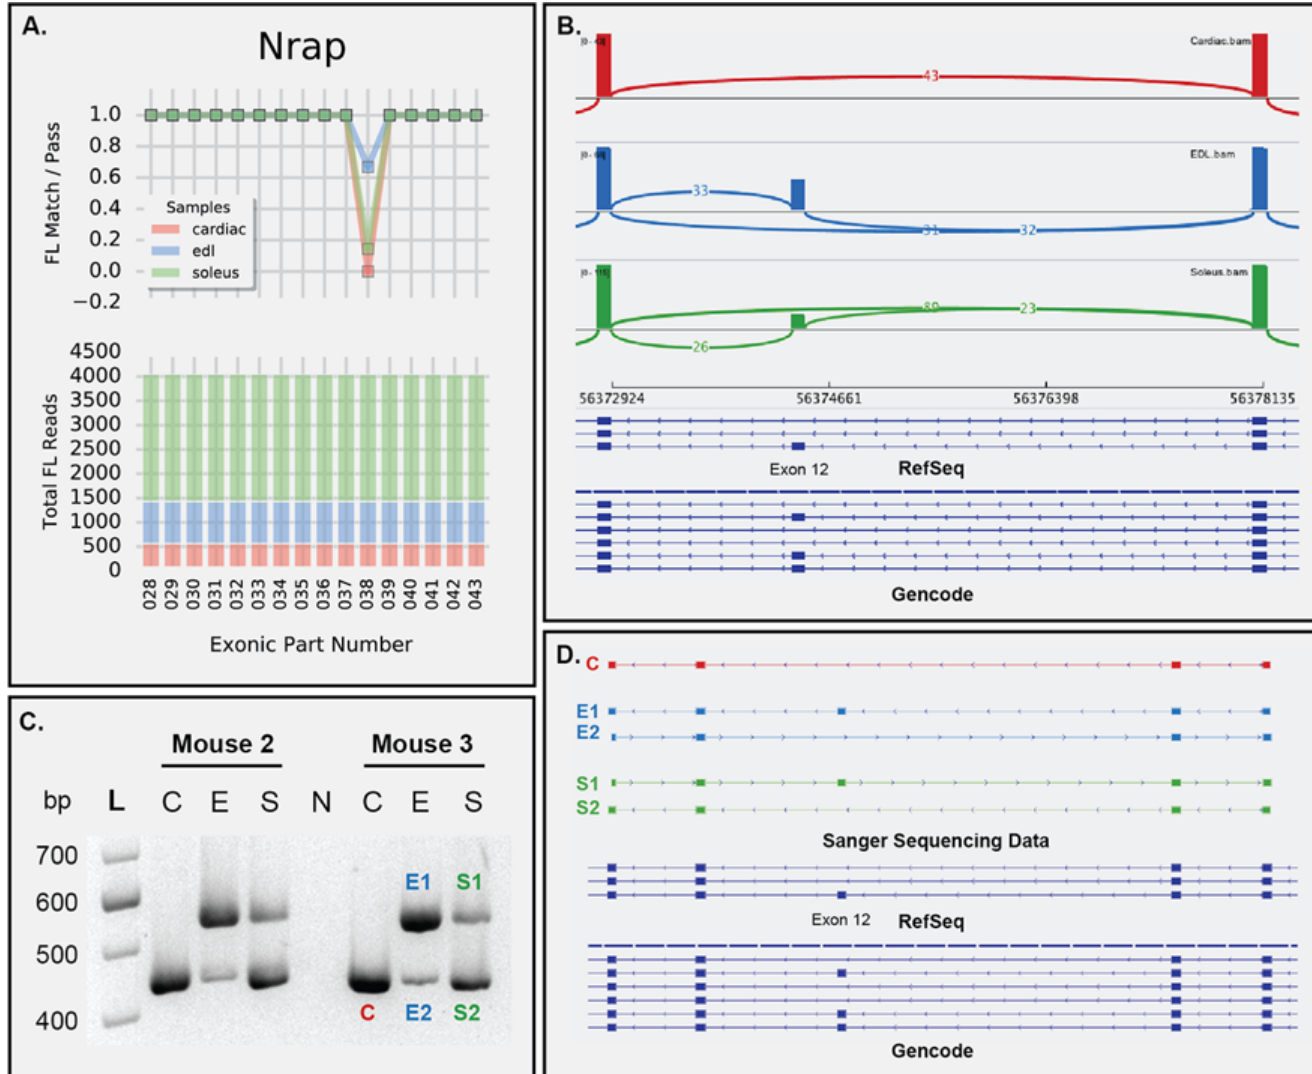

- Exon 12 was differentially spliced between tissues
- Are there other exons we didn't initially detect?

# Difficult to tell based on eyeballing reads (IGV)

Soleus IsoSeq Reads

Annotations

RefSeq

Gencode

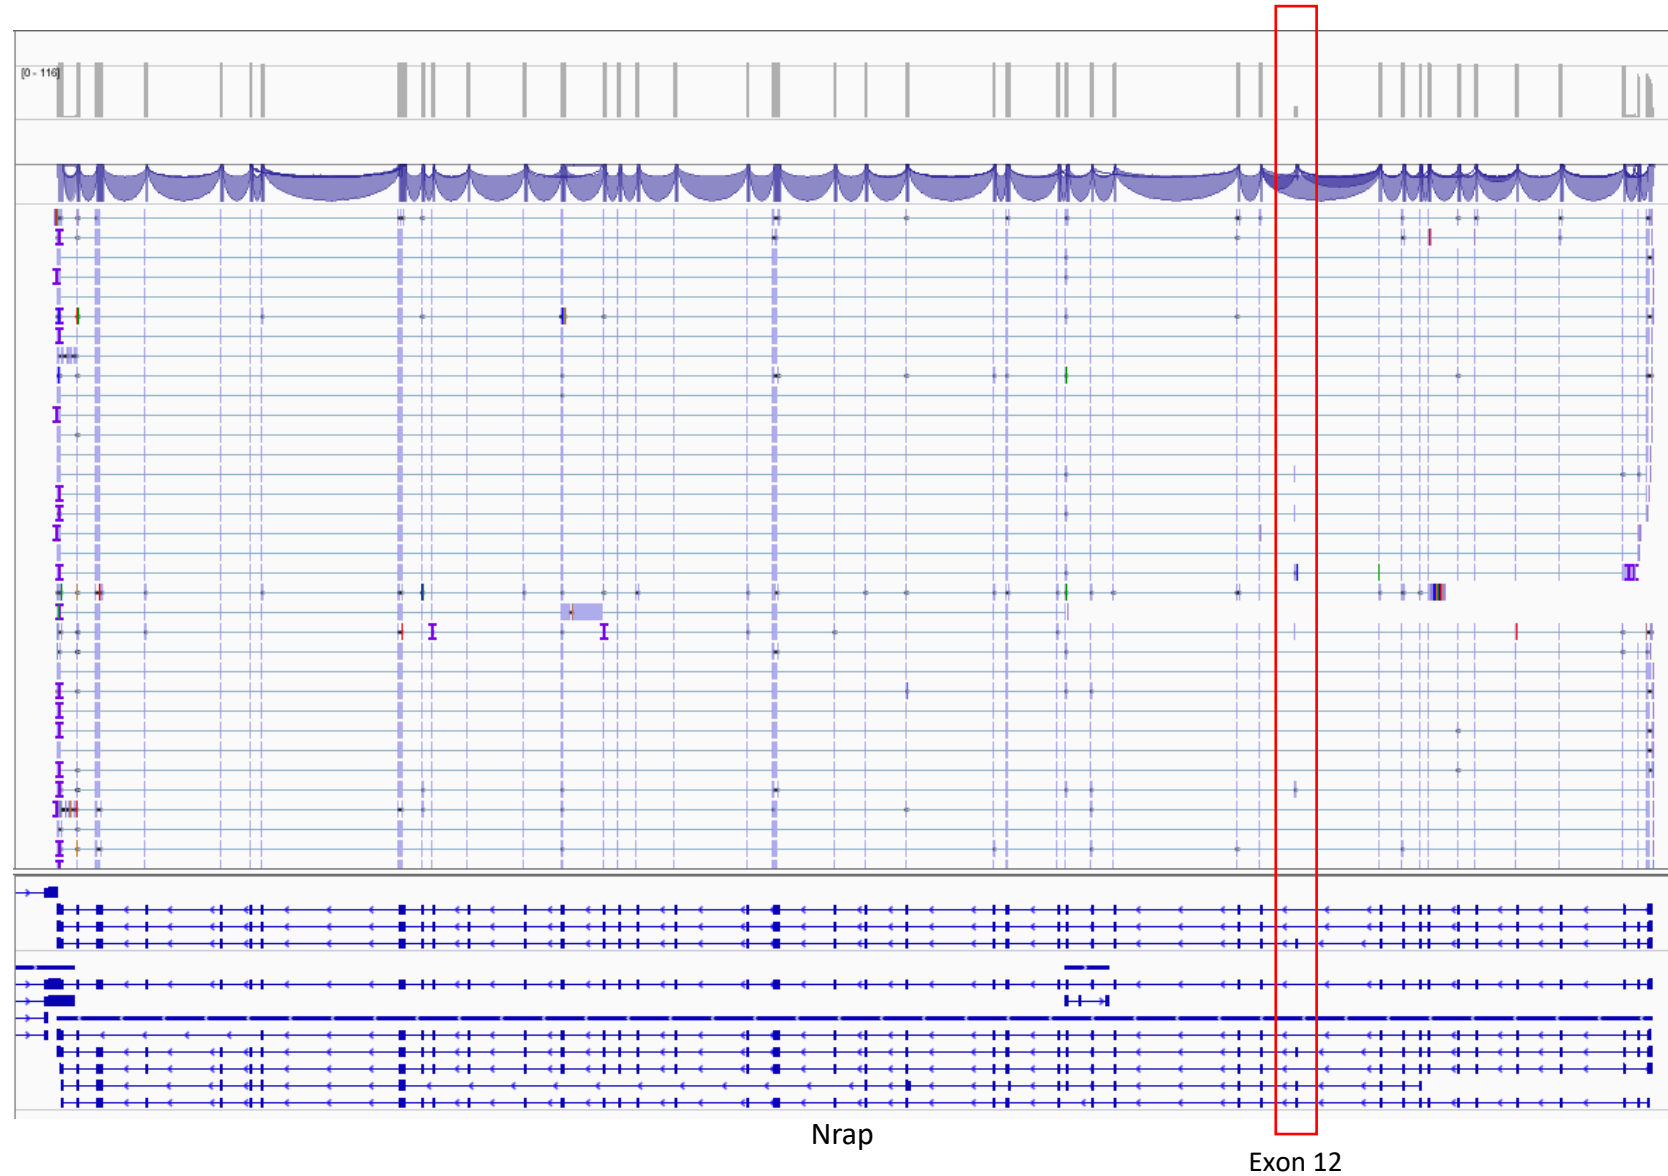

# Example Analysis: Nrap transcript expression between Cardiac, EDL and Soleus using Gencode mm10 annotations

- Exons 2, 12, 37, 38, 39 and 40 are cassette/isoform defining exons (6 total)
  - Omitting ENSMUST00000169099.7 which is short and has been labeled as 'non-sense mediated decay'
- Added a 6 constitutively expressed adjacent/neighboring exons as anchors for analysis, exons 41, 36, 13, 11, 3, 1
  - Not required for phasing to work, but adds some context and helps validate findings

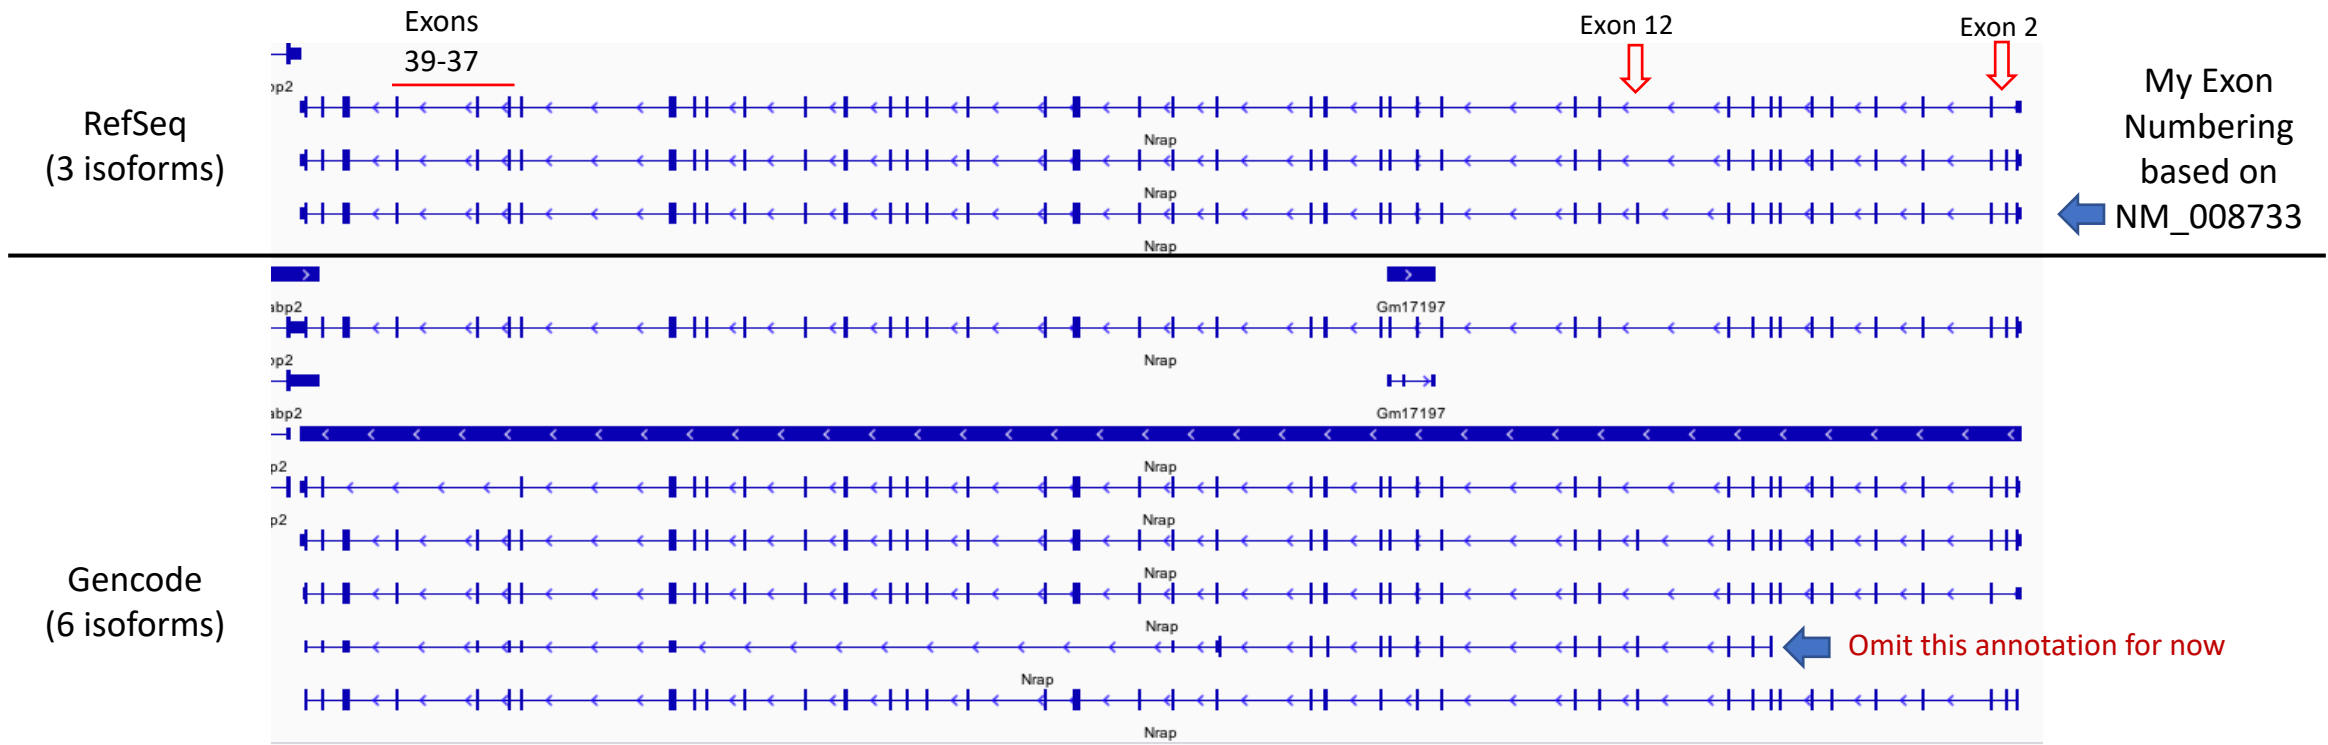

Input bed file (genomic coordinate file separated by tabs) for Nrap

| <u>Chrom</u> | <u>Start</u> | <u>End</u> | <u>Name</u> | <u>Score</u> | <u>Strand</u> |
|--------------|--------------|------------|-------------|--------------|---------------|
| chr19        | 56320884     | 56321016   | exon41      | 0            | -             |
| chr19        | 56321722     | 56322034   | exon40      | 0            | -             |
| chr19        | 56323887     | 56323995   | exon39      | 0            | -             |
| chr19        | 56327194     | 56327299   | exon38      | 0            | -             |
| chr19        | 56328500     | 56328599   | exon37      | 0            | -             |
| chr19        | 56328995     | 56329100   | exon36      | 0            | -             |
| chr19        | 56372806     | 56372914   | exon13      | 0            | -             |
| chr19        | 56374363     | 56374468   | exon12      | 0            | -             |
| chr19        | 56378054     | 56378171   | exon11      | 0            | -             |
| chr19        | 56388748     | 56388836   | exon3       | 0            | -             |
| chr19        | 56389389     | 56389484   | exon2       | 0            | -             |
| chr19        | 56389805     | 56390038   | exon1       | 0            | -             |

Red exon names  
are isoform  
defining exons

- Original coordinates were extracted from UCSC Table Browser (RefSeq mm10 for NRAP)
- Modified name column to make it easier for me to remember the exons
- Input to script also requires sample bam files and gencode annotation (gtf) file selected for the target gene
  - cardiac.bam, edl.bam, soleus.bam, nrap.gtf, nrap\_exons.bed

Basic statistics on reads that contained interval range (keepers used in phasing analysis) vs total reads overlapping interval range (all reads)

| Sample  | Reads that Contain Interval range |                   | Reads that overlap interval range |                   | Percent contained / overlap |                   |
|---------|-----------------------------------|-------------------|-----------------------------------|-------------------|-----------------------------|-------------------|
|         | Cluster count                     | Full-length count | Cluster count                     | Full-length count | Cluster count               | Full-length count |
| cardiac | 12                                | <b>399</b>        | 43                                | <b>567</b>        | 27.9%                       | <b>70.4%</b>      |
| edl     | 12                                | <b>483</b>        | 68                                | <b>863</b>        | 17.6%                       | <b>56.0%</b>      |
| soleus  | 32                                | <b>1771</b>       | 116                               | <b>2622</b>       | 27.6%                       | <b>67.5%</b>      |

- **Cluster count** = Pacbio's cluster/consensus read that is output from its ICE algorithm. Basically grouping multiple full-length reads by similarity and using it to increase sequence quality by forming in a single unique polished read
- **Full-length count** = number of full-length reads extracted from information in the cluster read (more accurate)

# Results for Nrap show that we are able to determine transcript level information from phasing of key exons in the annotation and read data

| Exon 41 | Exon 40c | Exon 39c | Exon 38c | Exon 37c | Exon 36 | Exon 13 | Exon 12c | Exon 11 | Exon 3 | Exon 2c | Exon 1 | transcript_ids                                 | Cardiac flCount | Cardiac pct | Edl flCount | Edl pct | Soleus flCount | Soleus pct |
|---------|----------|----------|----------|----------|---------|---------|----------|---------|--------|---------|--------|------------------------------------------------|-----------------|-------------|-------------|---------|----------------|------------|
| TRUE    | FALSE    | FALSE    | FALSE    | FALSE    | TRUE    | TRUE    | FALSE    | TRUE    | TRUE   | TRUE    | TRUE   | ENSMUST00000167239.7                           | 0               | 0%          | 0           | 0%      | 0              | 0%         |
| TRUE    | TRUE     | TRUE     | TRUE     | TRUE     | FALSE   | TRUE    | FALSE    | TRUE    | TRUE   | TRUE    | TRUE   | ?                                              | 0               | 0%          | 0           | 0%      | 4              | 0%         |
| TRUE    | TRUE     | TRUE     | TRUE     | TRUE     | TRUE    | TRUE    | FALSE    | TRUE    | TRUE   | FALSE   | TRUE   | ENSMUST00000095947.10                          | 14              | 4%          | 0           | 0%      | 1              | 0%         |
| TRUE    | TRUE     | TRUE     | TRUE     | TRUE     | TRUE    | TRUE    | FALSE    | TRUE    | TRUE   | TRUE    | TRUE   | ENSMUST00000040711.14                          | 385             | 96%         | 153         | 32%     | 1553           | 88%        |
| TRUE    | TRUE     | TRUE     | TRUE     | TRUE     | TRUE    | TRUE    | TRUE     | TRUE    | TRUE   | FALSE   | TRUE   | ?                                              | 0               | 0%          | 0           | 0%      | 1              | 0%         |
| TRUE    | TRUE     | TRUE     | TRUE     | TRUE     | TRUE    | TRUE    | TRUE     | TRUE    | TRUE   | TRUE    | TRUE   | ENSMUST00000073536.12,<br>ENSMUST00000166203.1 | 0               | 0%          | 330         | 68%     | 212            | 12%        |
|         |          |          |          |          |         |         |          |         |        |         |        | total                                          | 399             |             | 483         |         | 1771           |            |

- ENSMUST00000073536.12, and ENSMUST00000166203.1 are almost identical except for lengths of 3' and 5' UTR
  - Indistinguishable with current Interval range
- Some reads in cardiac for ENSMUST00000095947.10 wasn't seen before
  - Has low coverage (14 reads). Could be rare transcript.
- Transcript level analysis shows similar ratios of differential expression as exon 12 RT-PCR
- The two unannotated matches (?) were checked in IGV to be from artifact reads

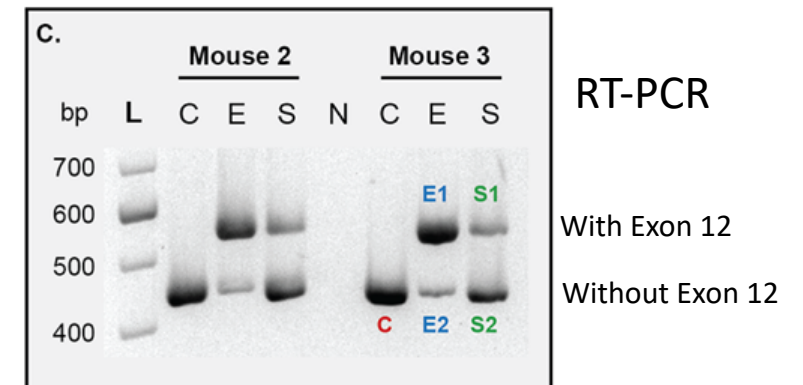

Supplement: Supplemental_Code.zip [file exPhaser_implementation.pdf › isoseq_manuscript_resources-master/s3_exPhaser_analysis_pipeline/exPhaser_implementation.pdf]
