# Supplementary material for: A long-read RNA-seq approach to identify novel transcripts of very large genes
Source: HighWire-hosted journal article supplement (doi:10.1101/gr.259903.119), 2020-06-01

# AI314180

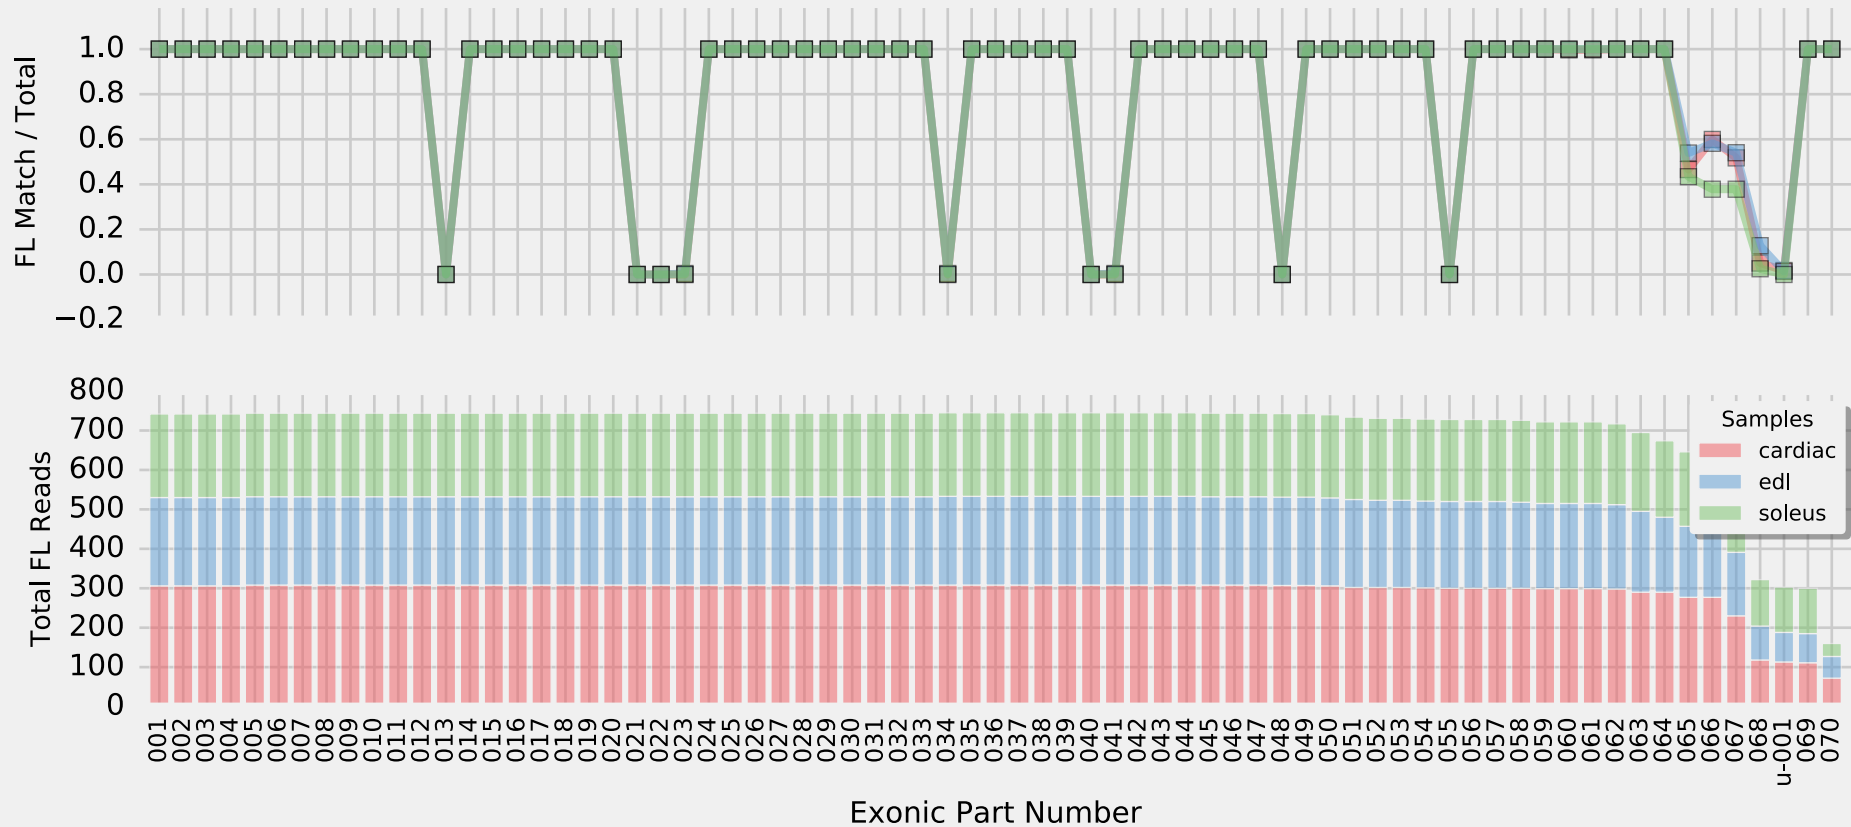

# AU022252

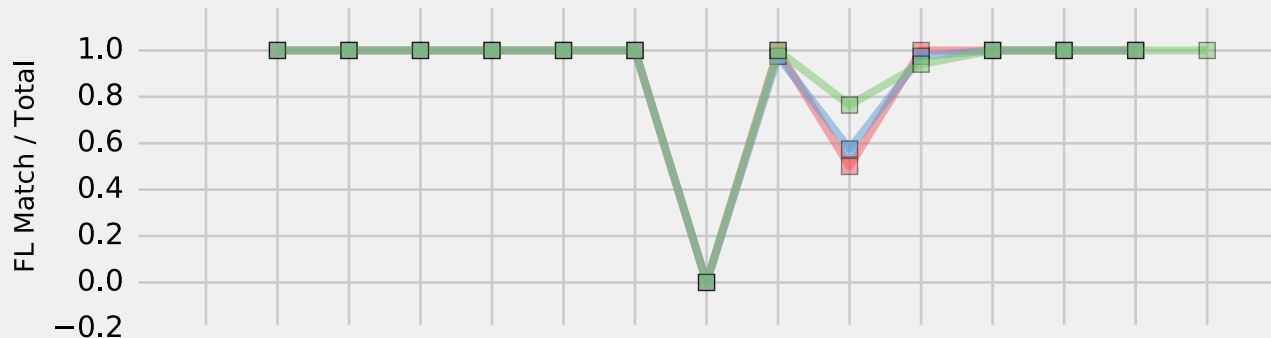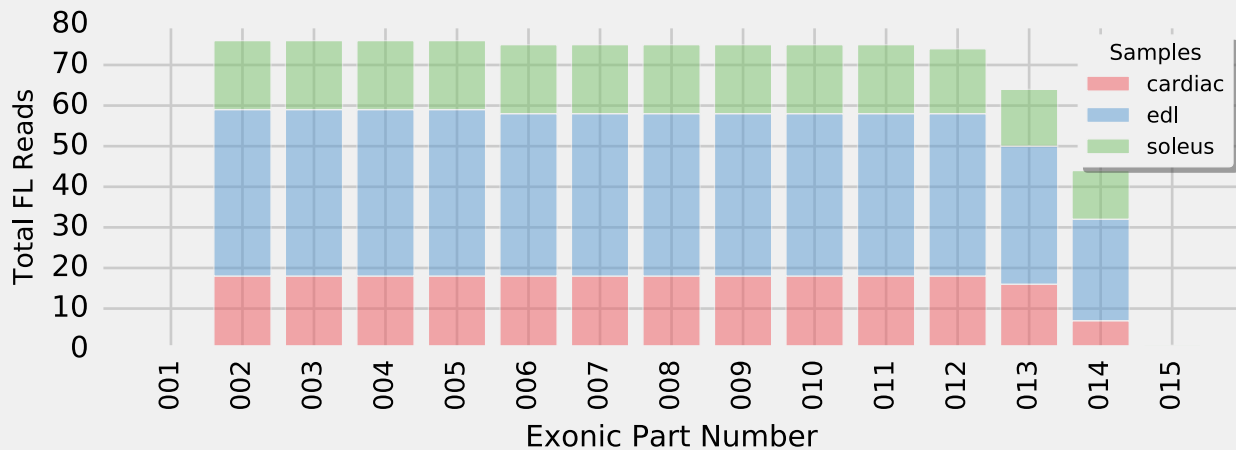



# Abca1

FL Match / Total

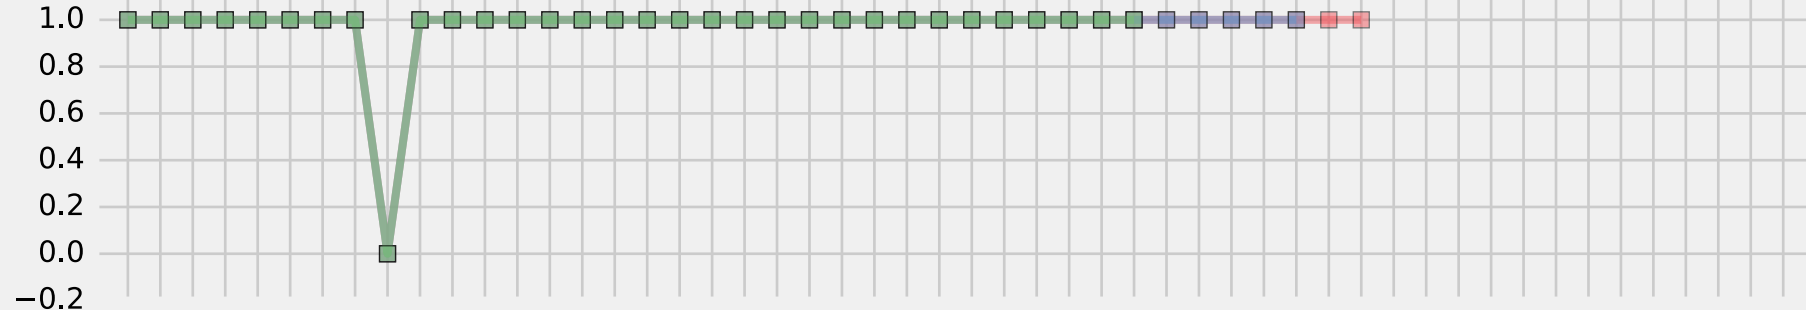

Total FL Reads

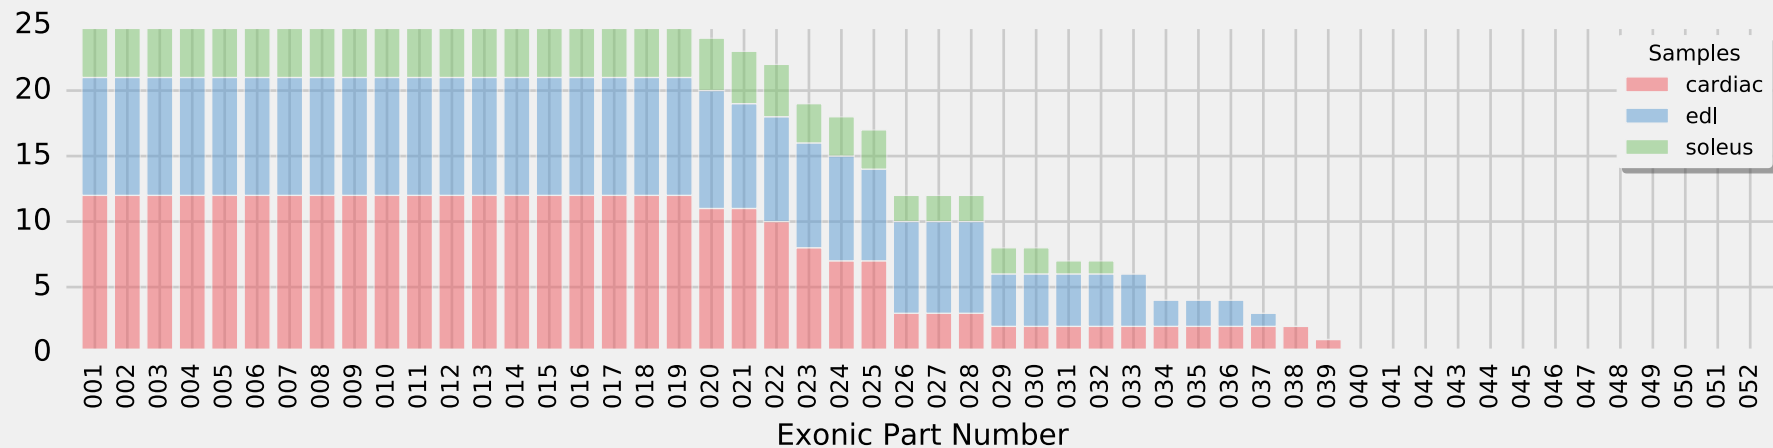

# Abca3

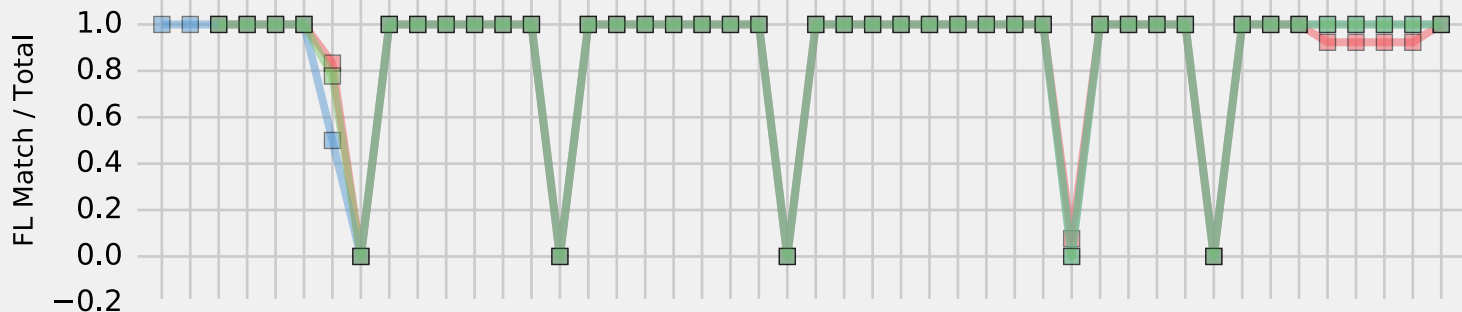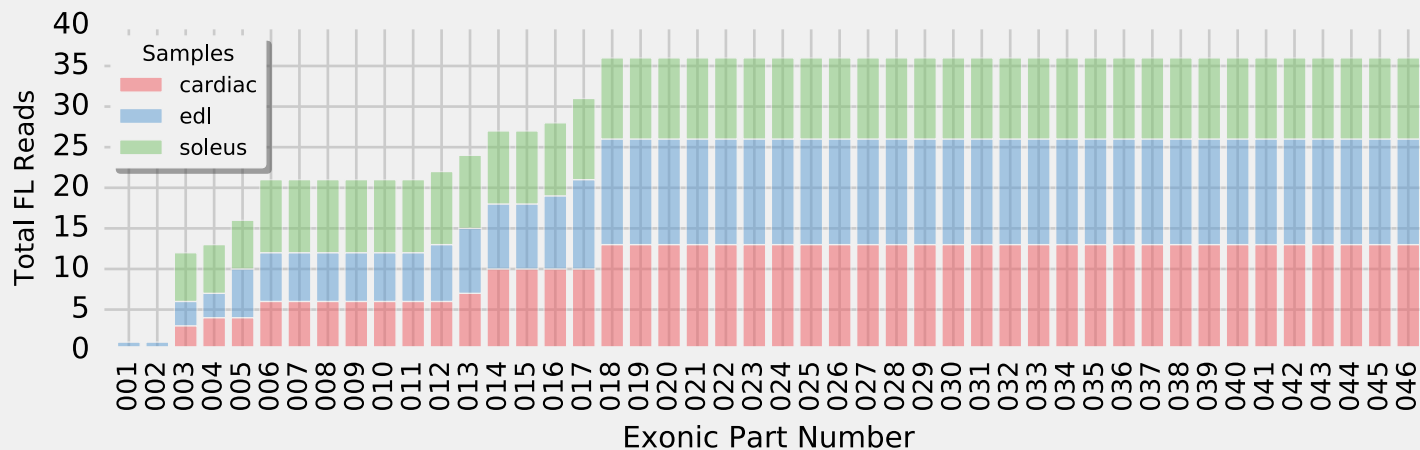

# Abca5

FL Match / Total

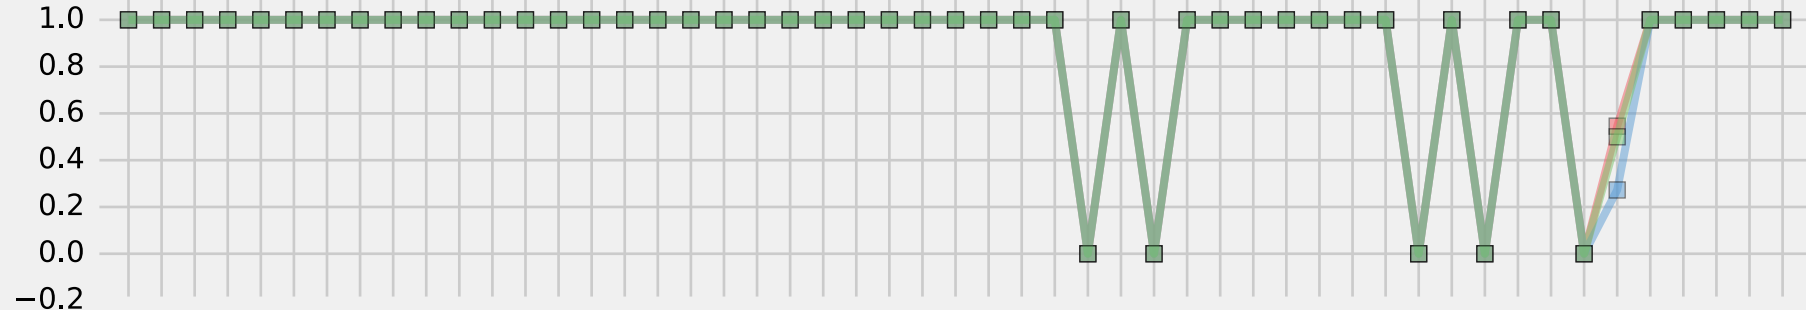

Total FL Reads

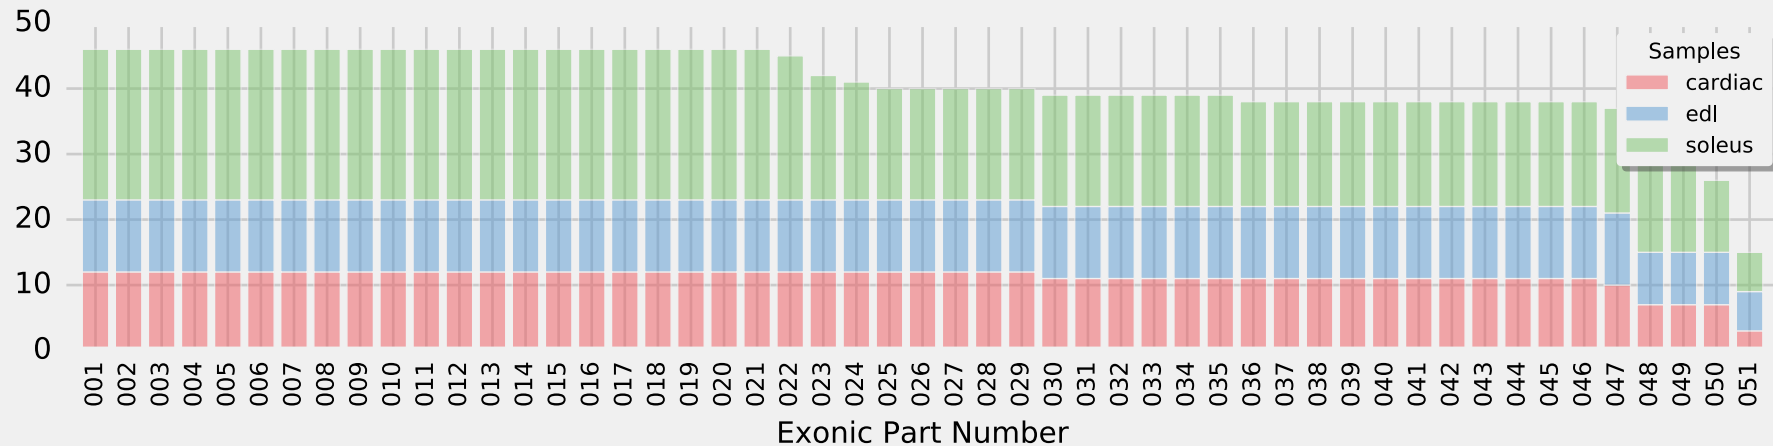

# Abca8a

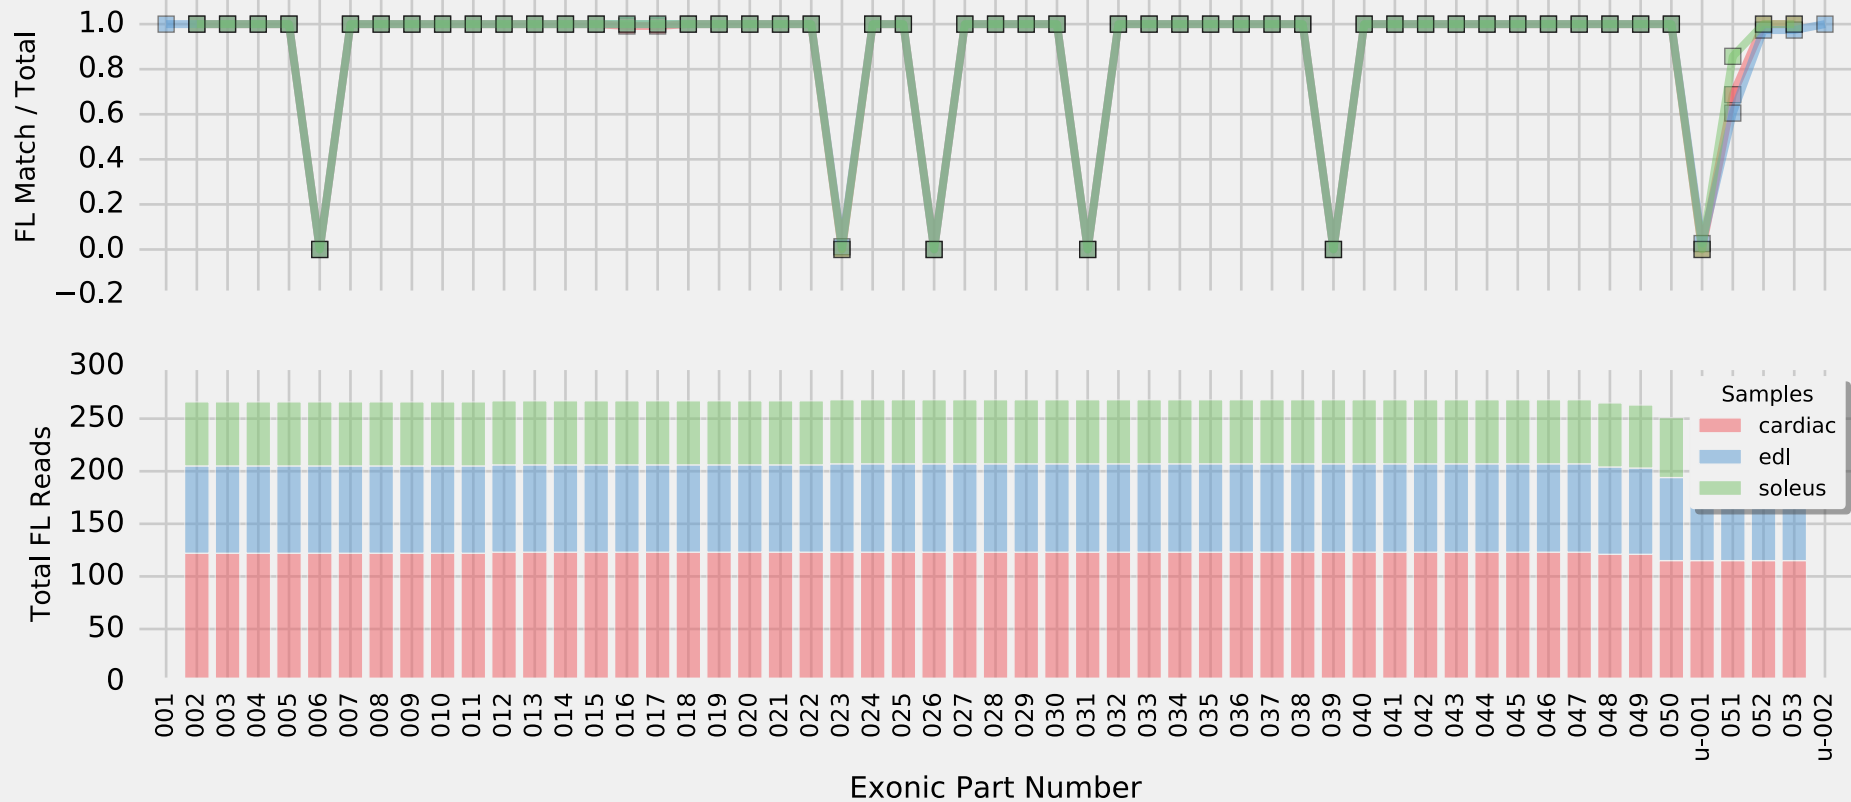

# Abca8b

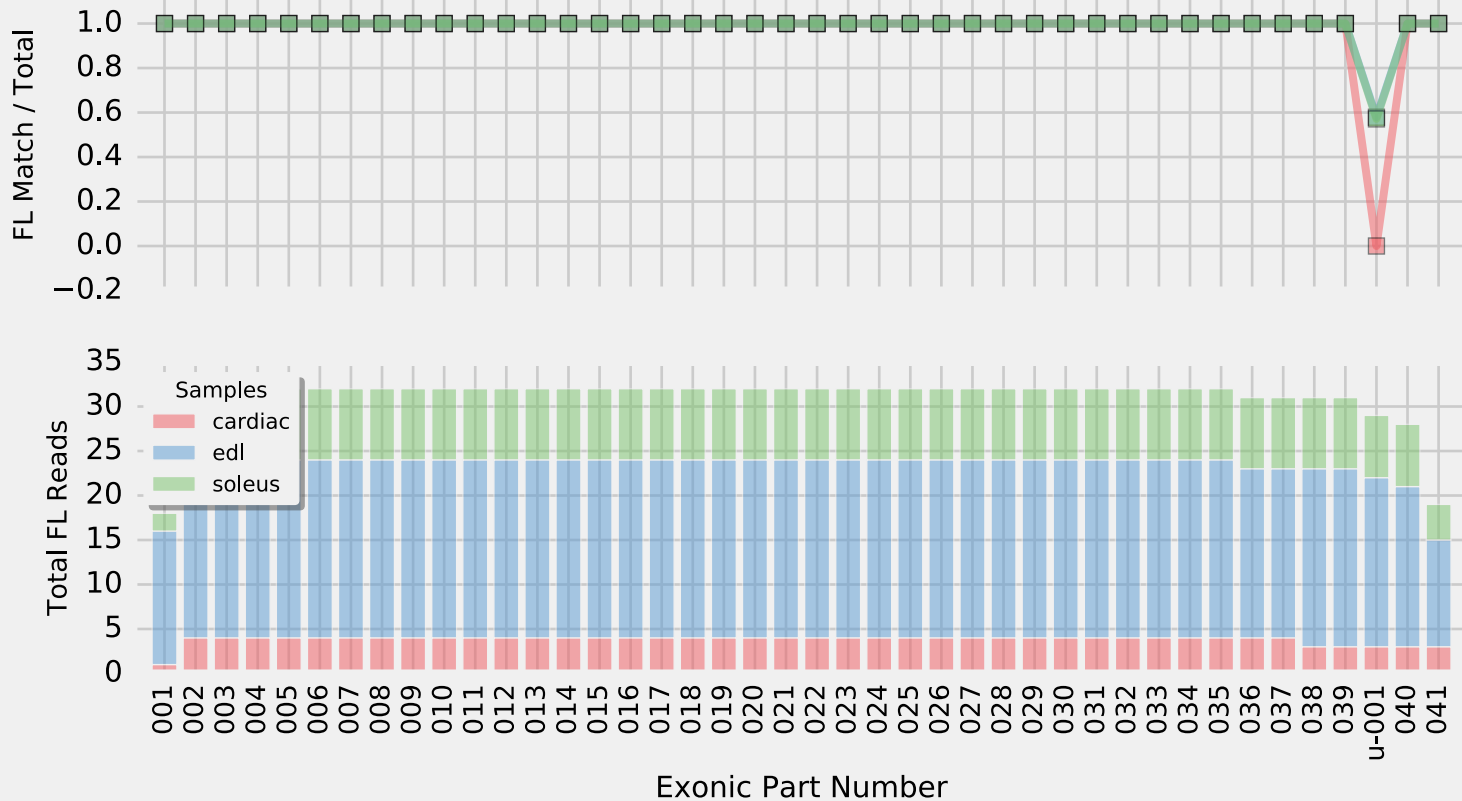

# Abca9

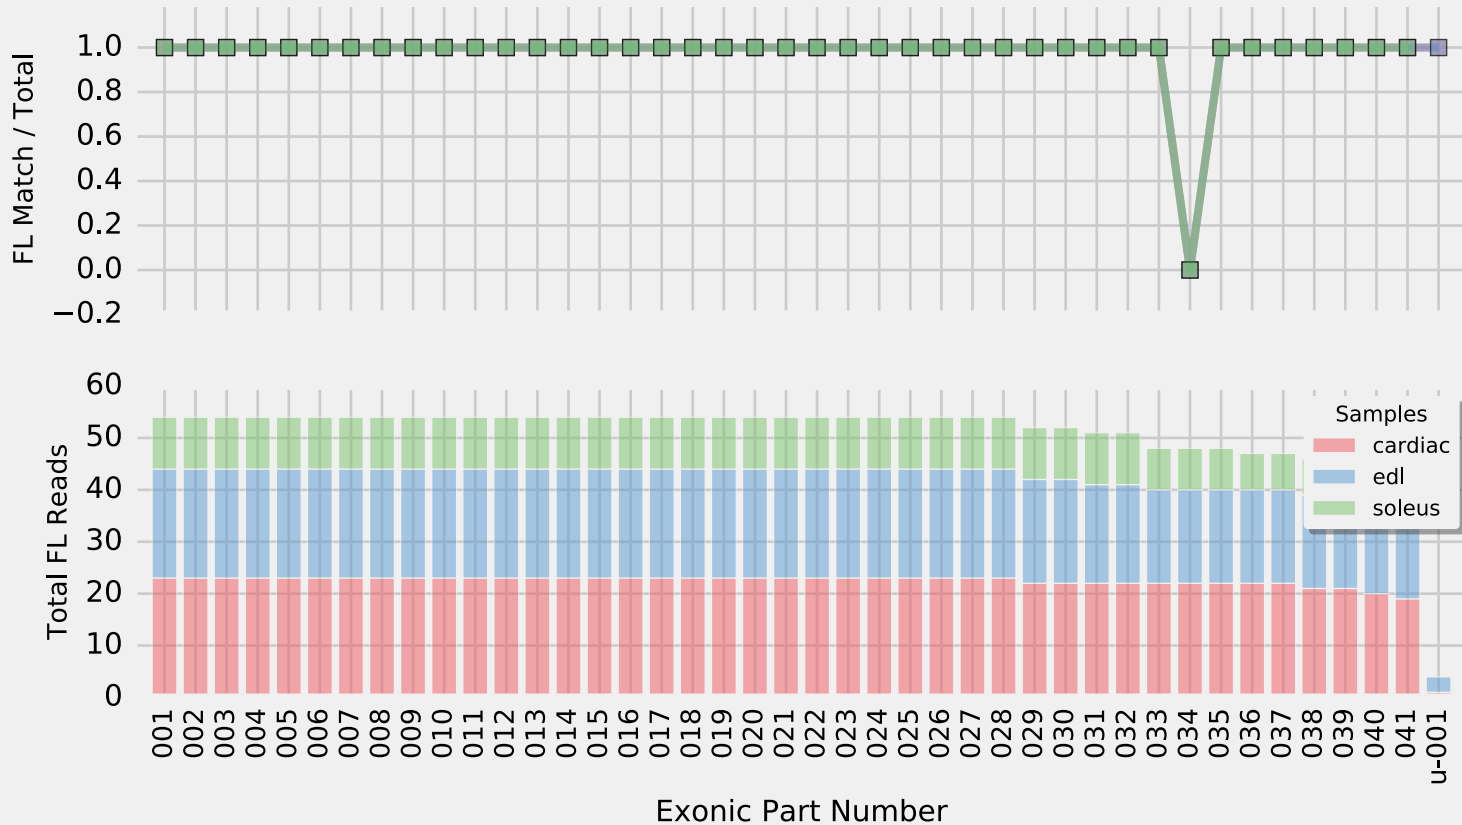

# Abcb7

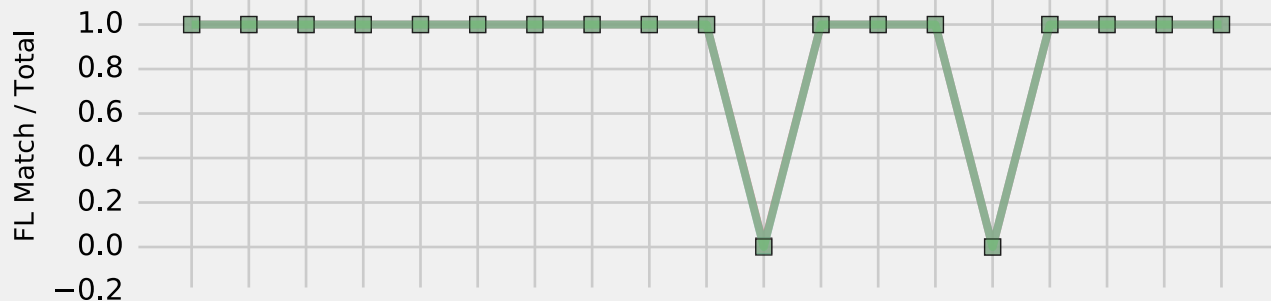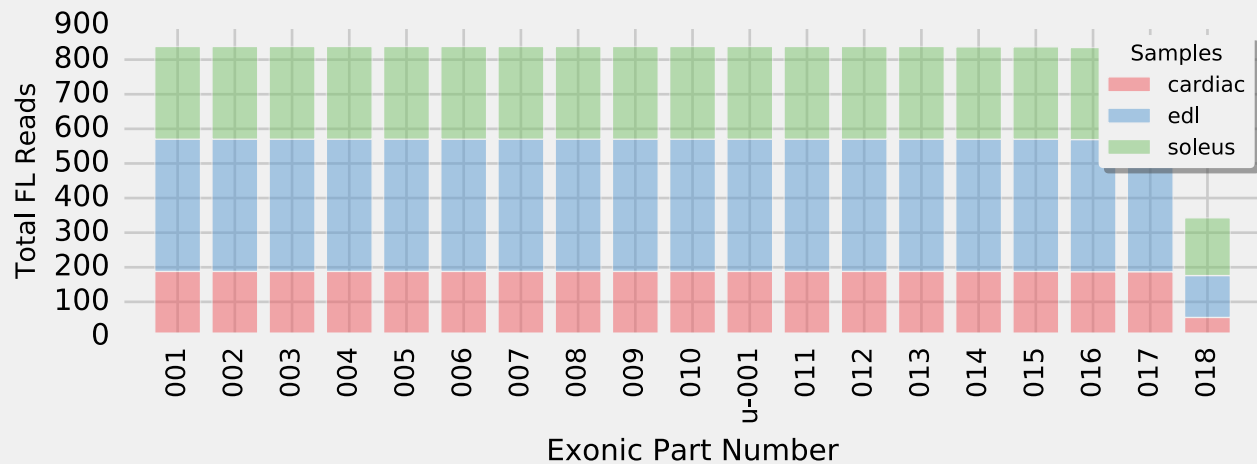

# Abcc1

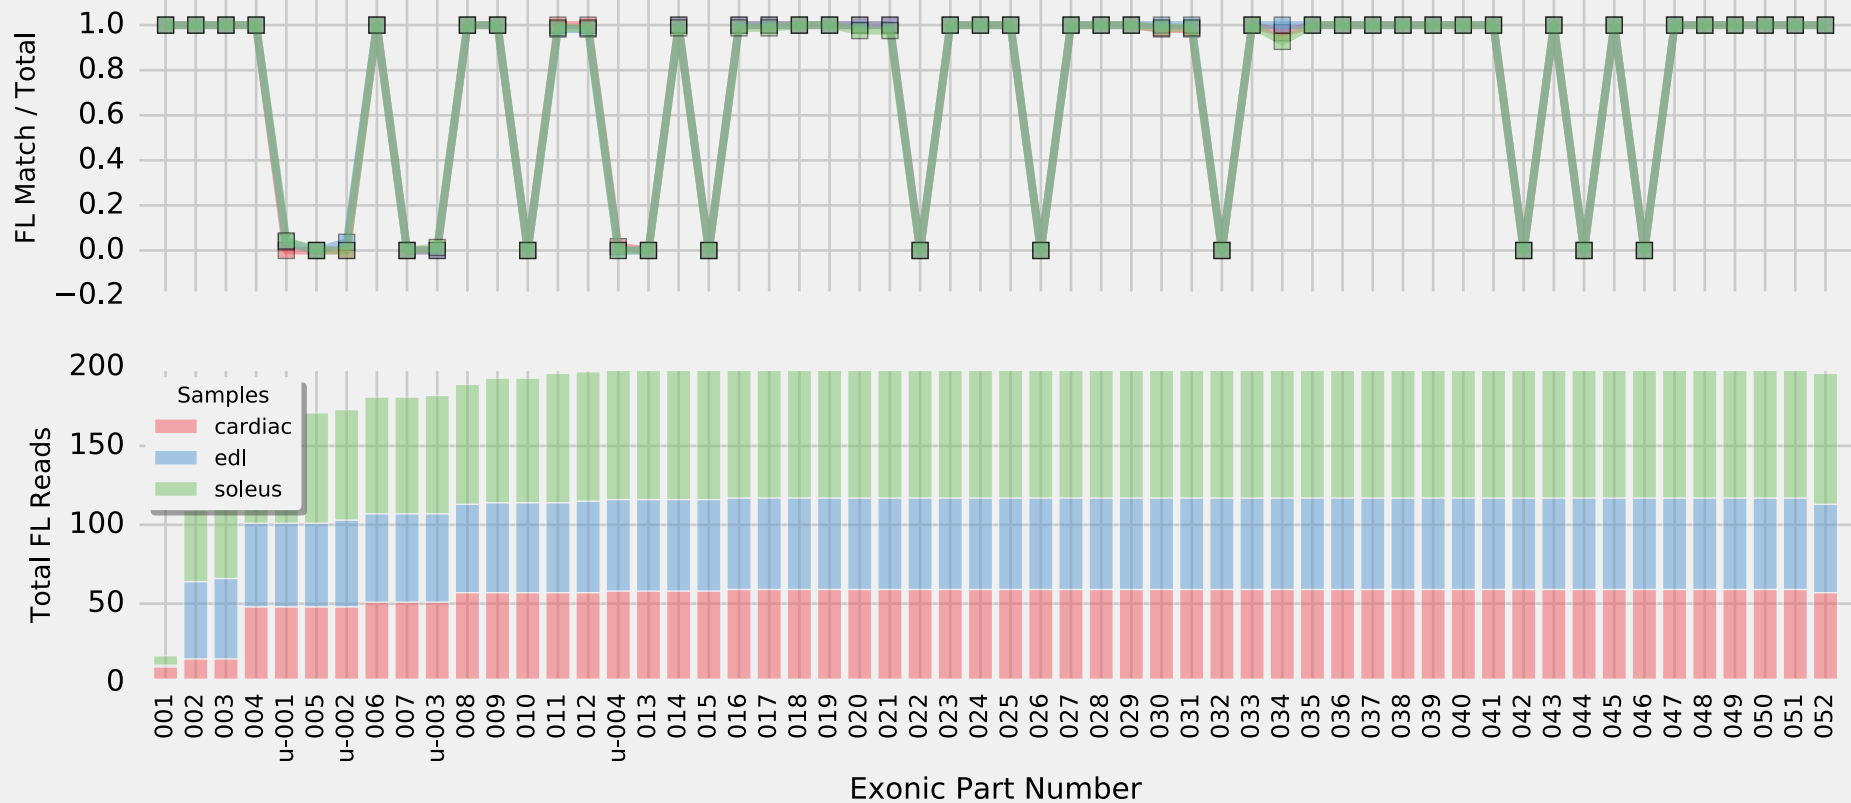



# Abcc5

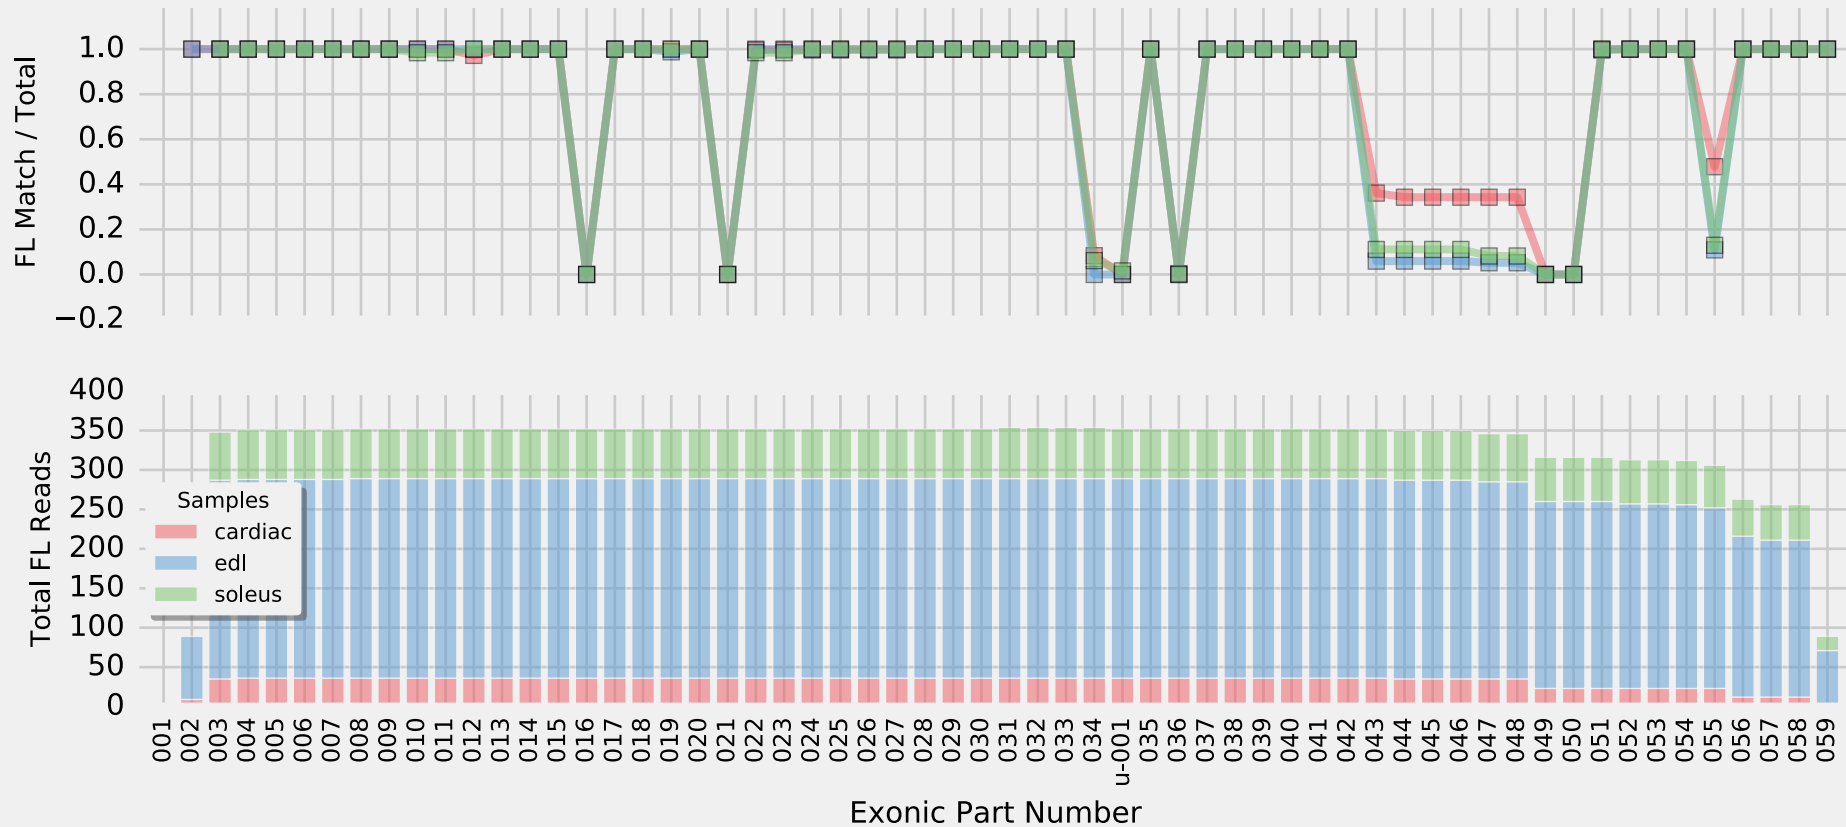

# Abcc9

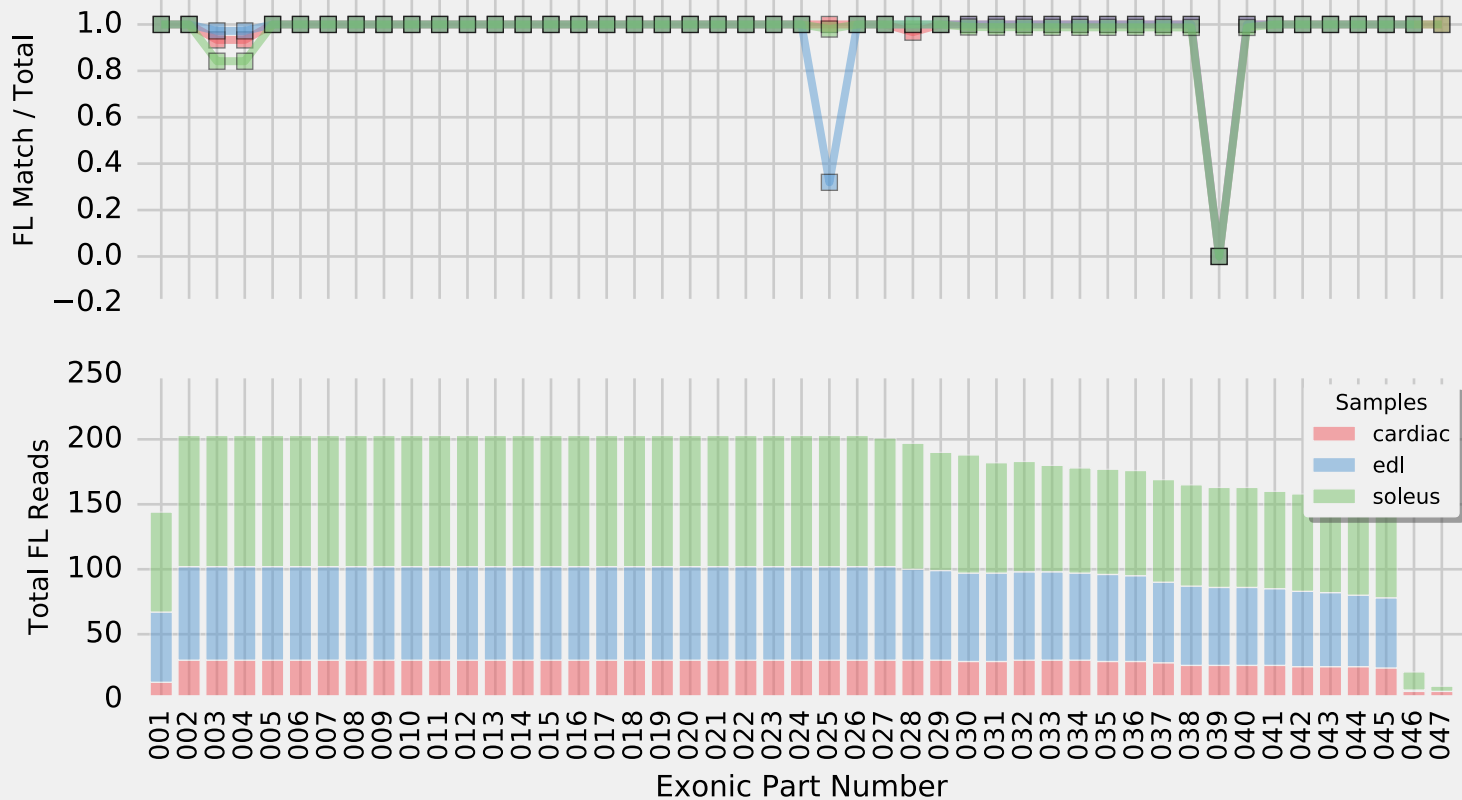

# Abcd2

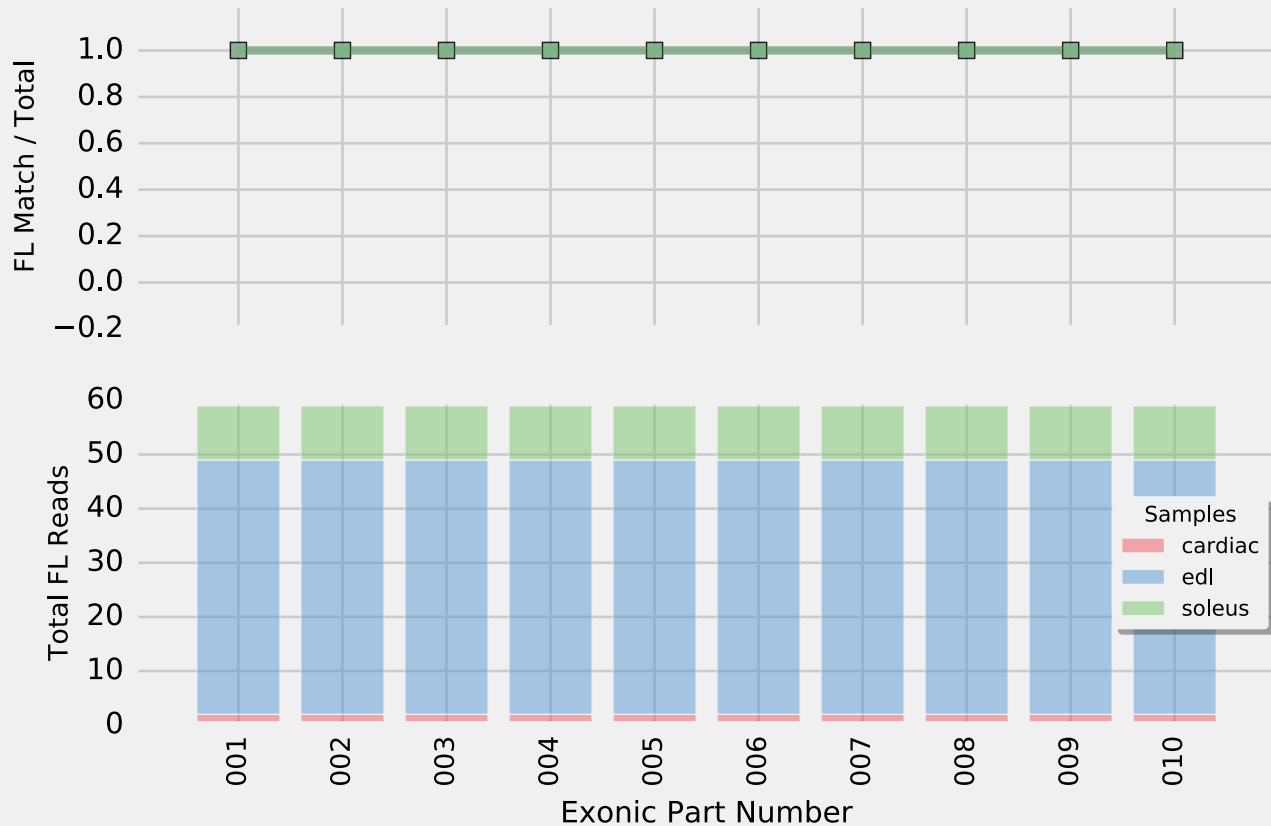

# Abi2

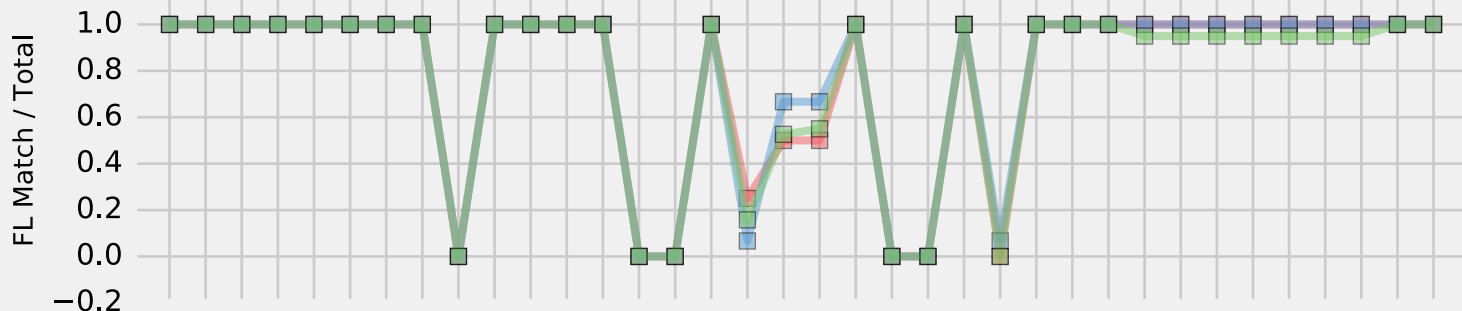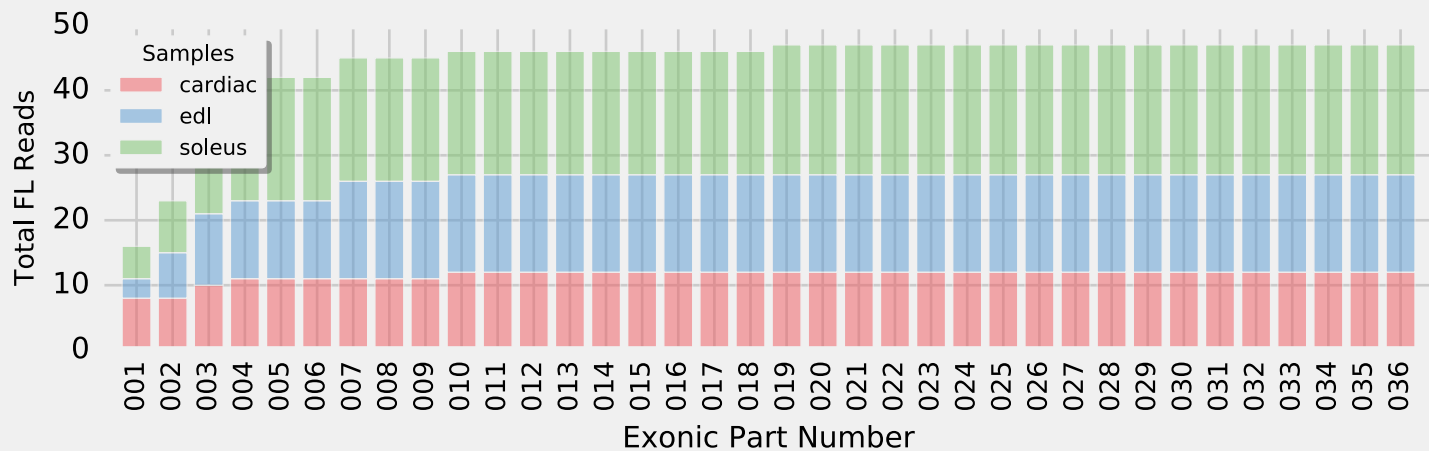

# Ablim1

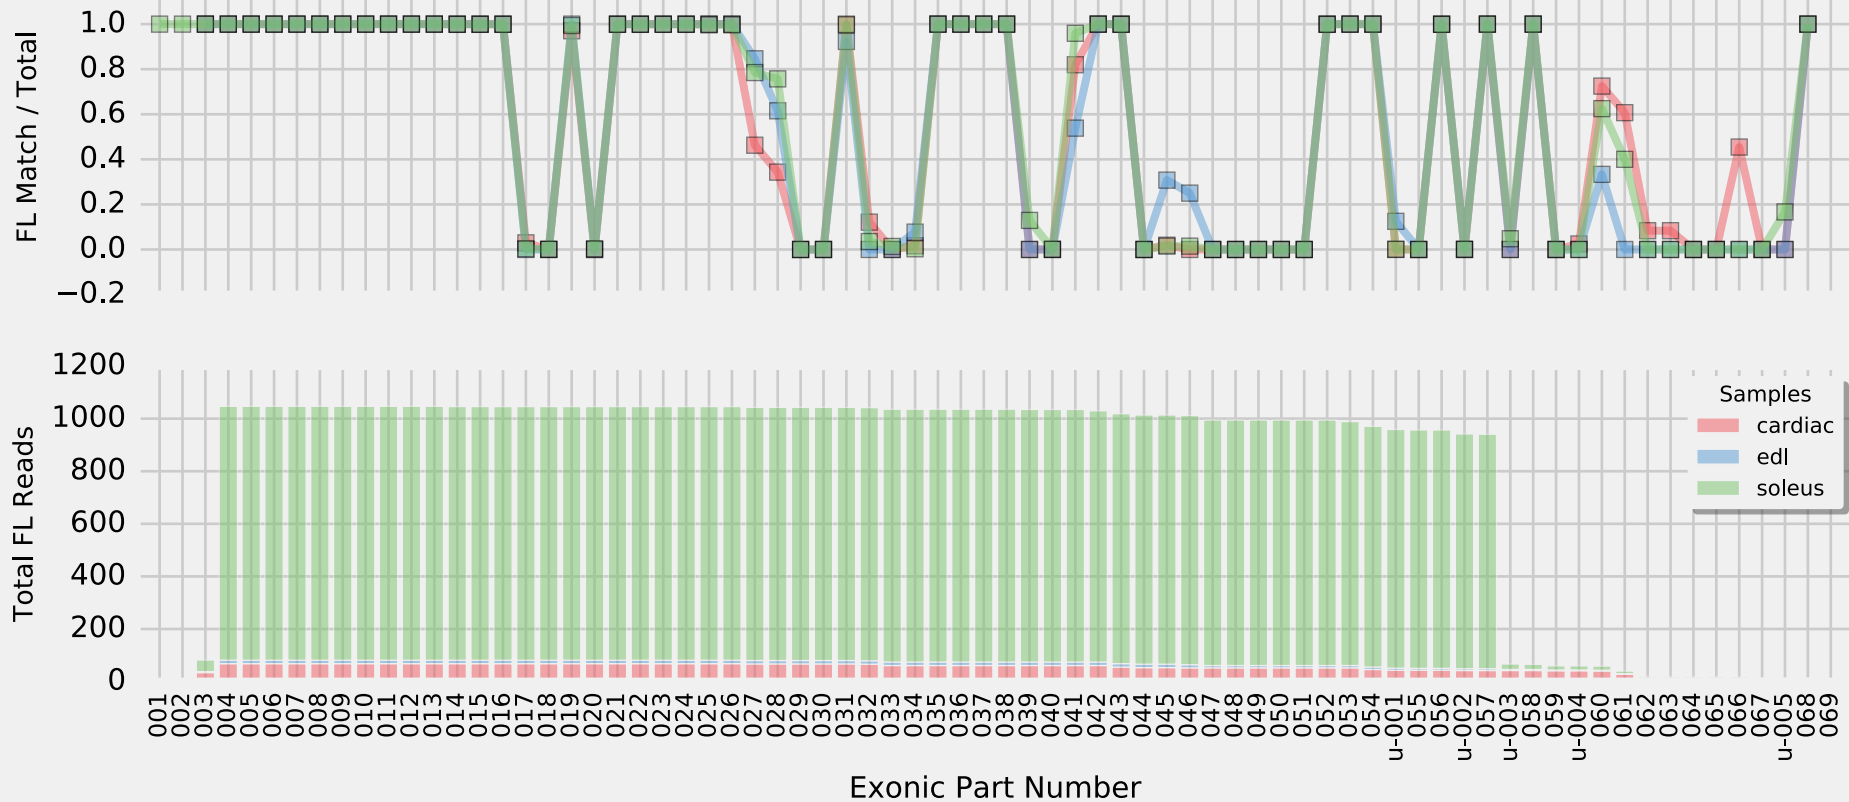

# Acacb

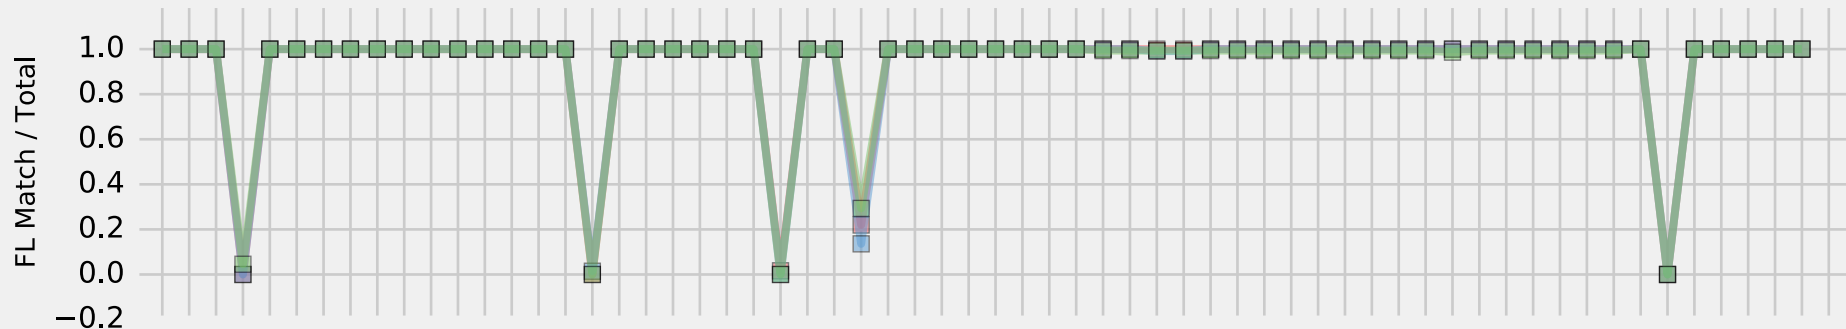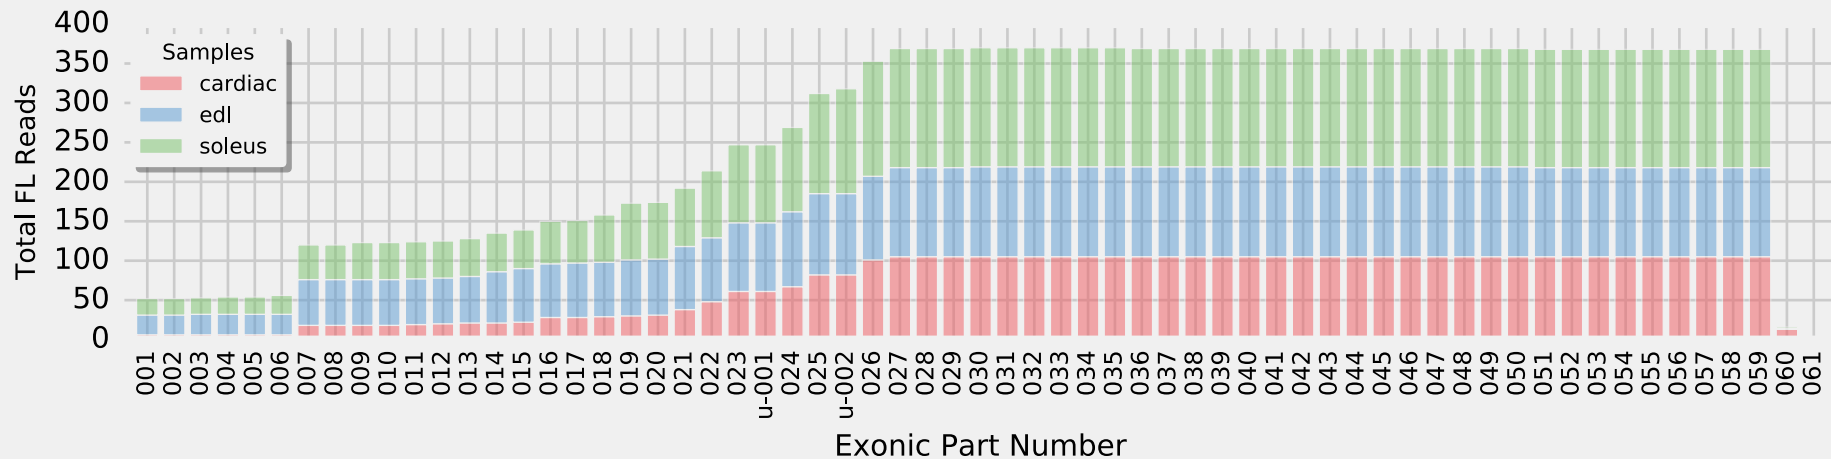

# Acap2

FL Match / Total

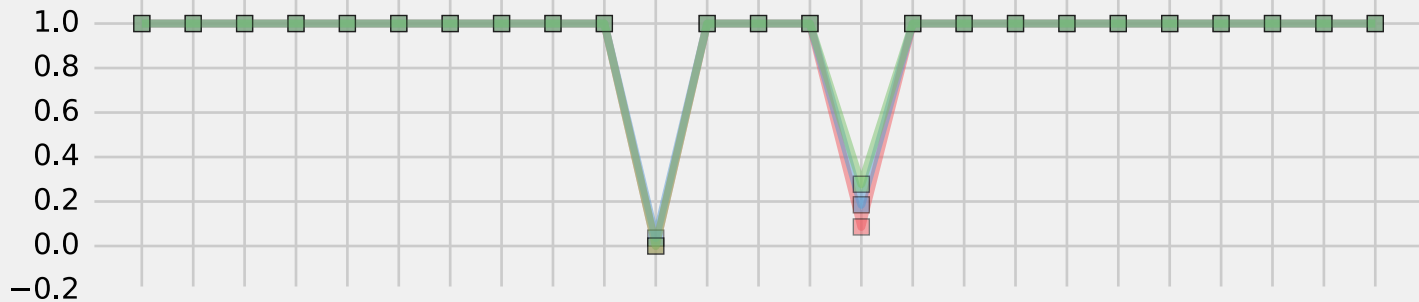

Total FL Reads

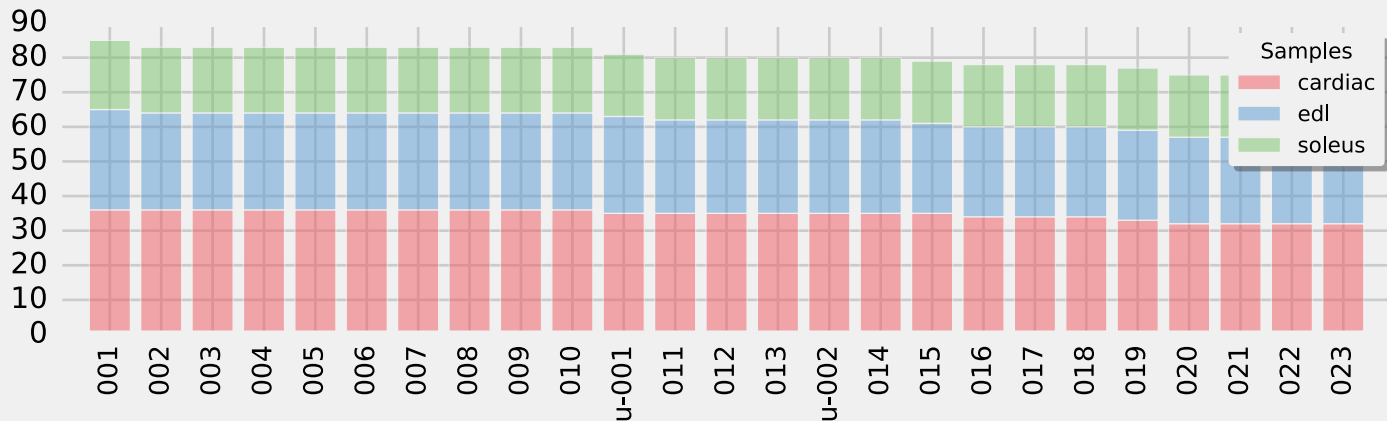

Exonic Part Number

# Actn2

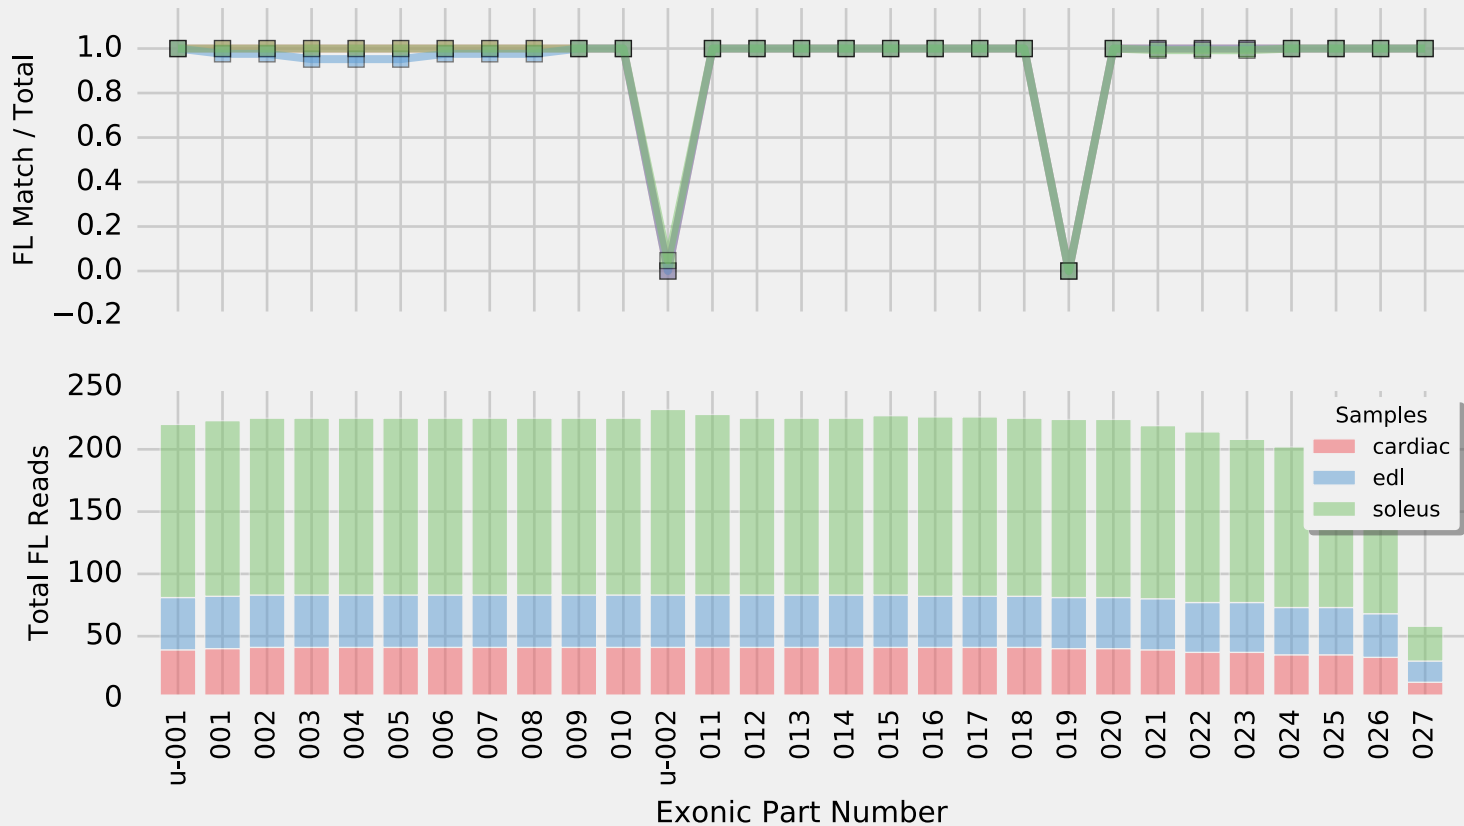



# Acvr2a

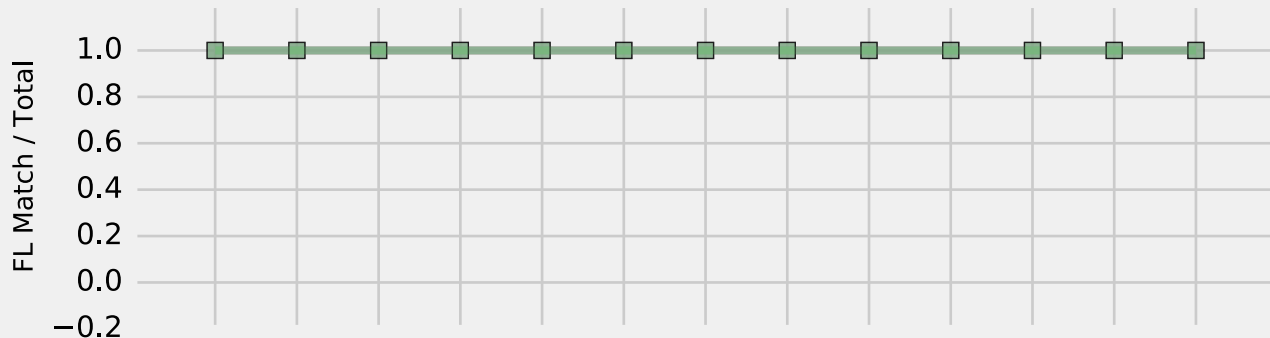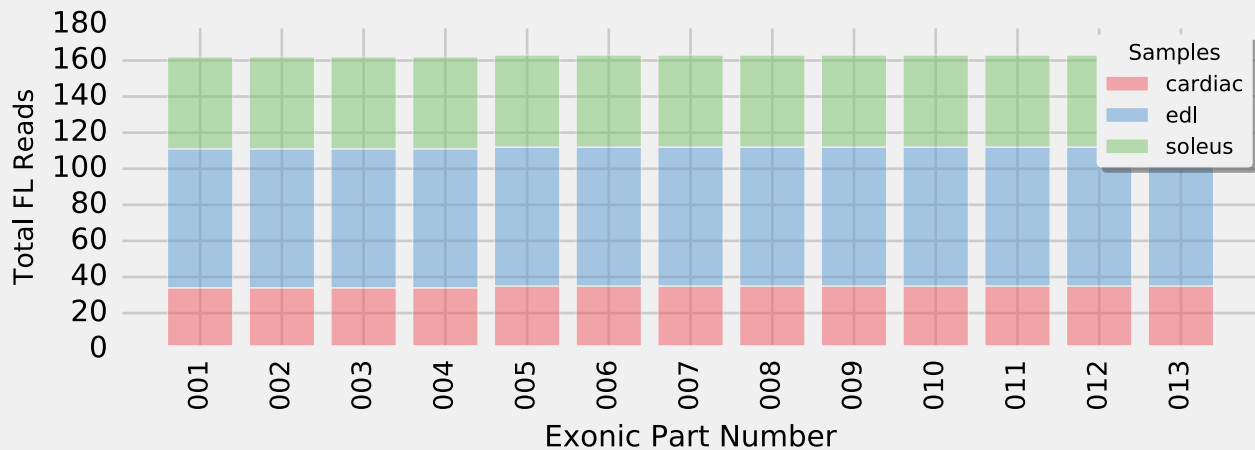

# Adcy6

FL Match / Total

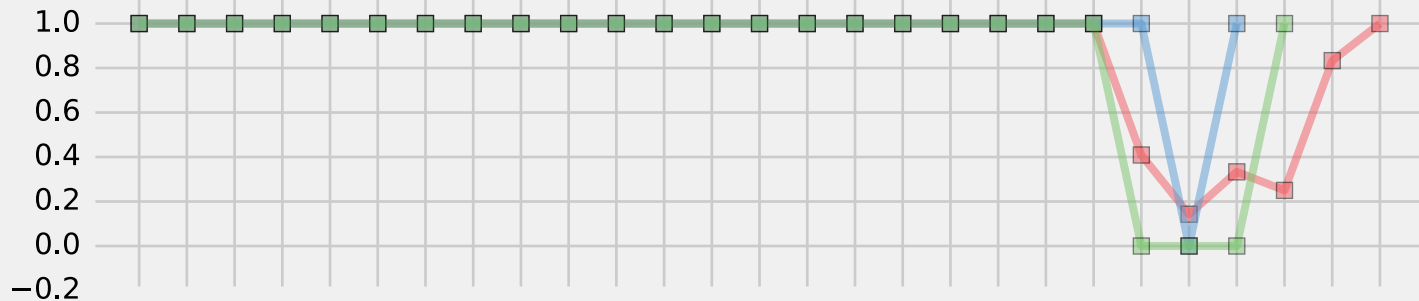

Total FL Reads

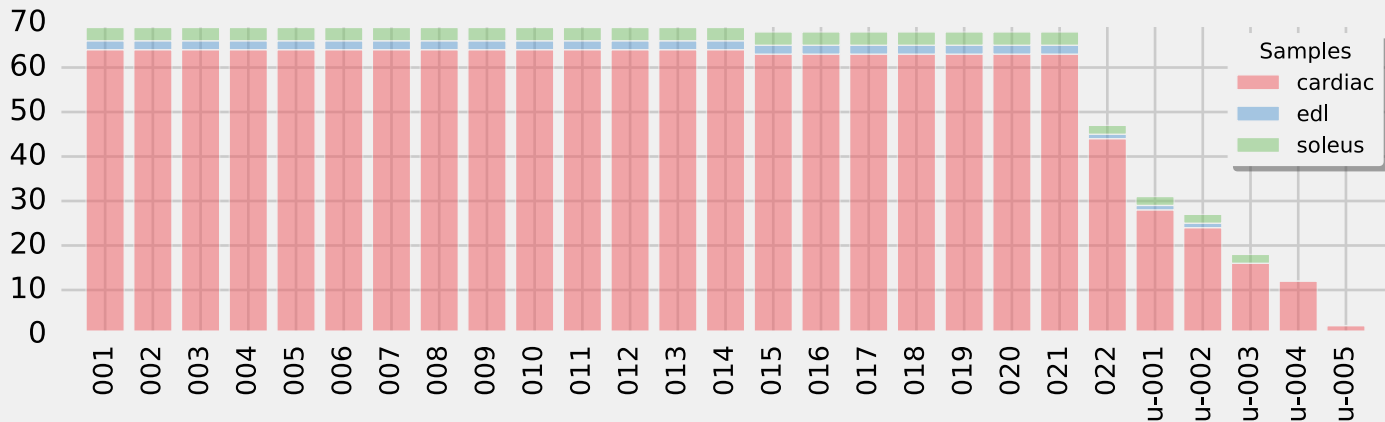

Exonic Part Number

# Adgrf5

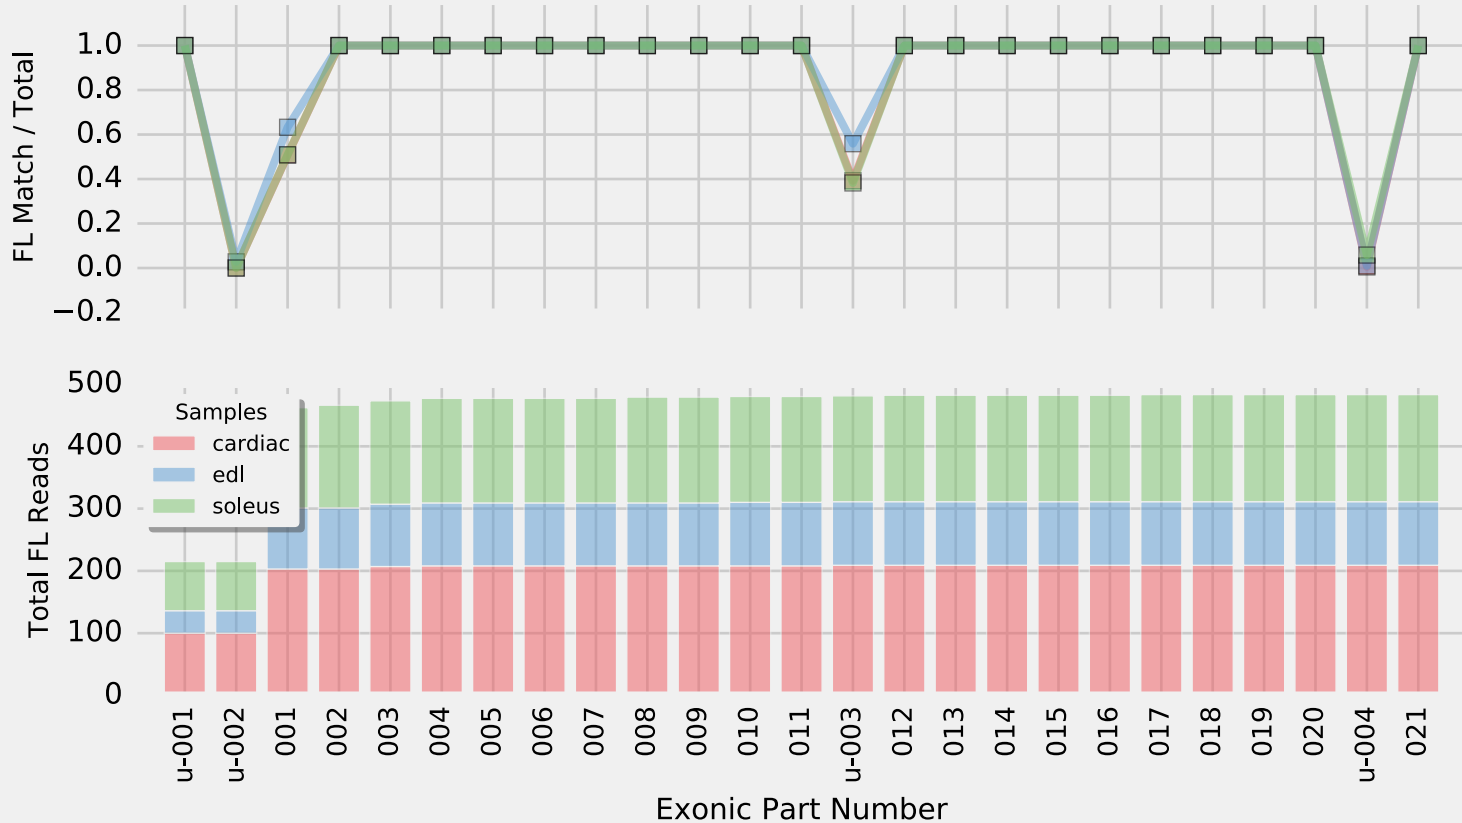

# Adgrl2

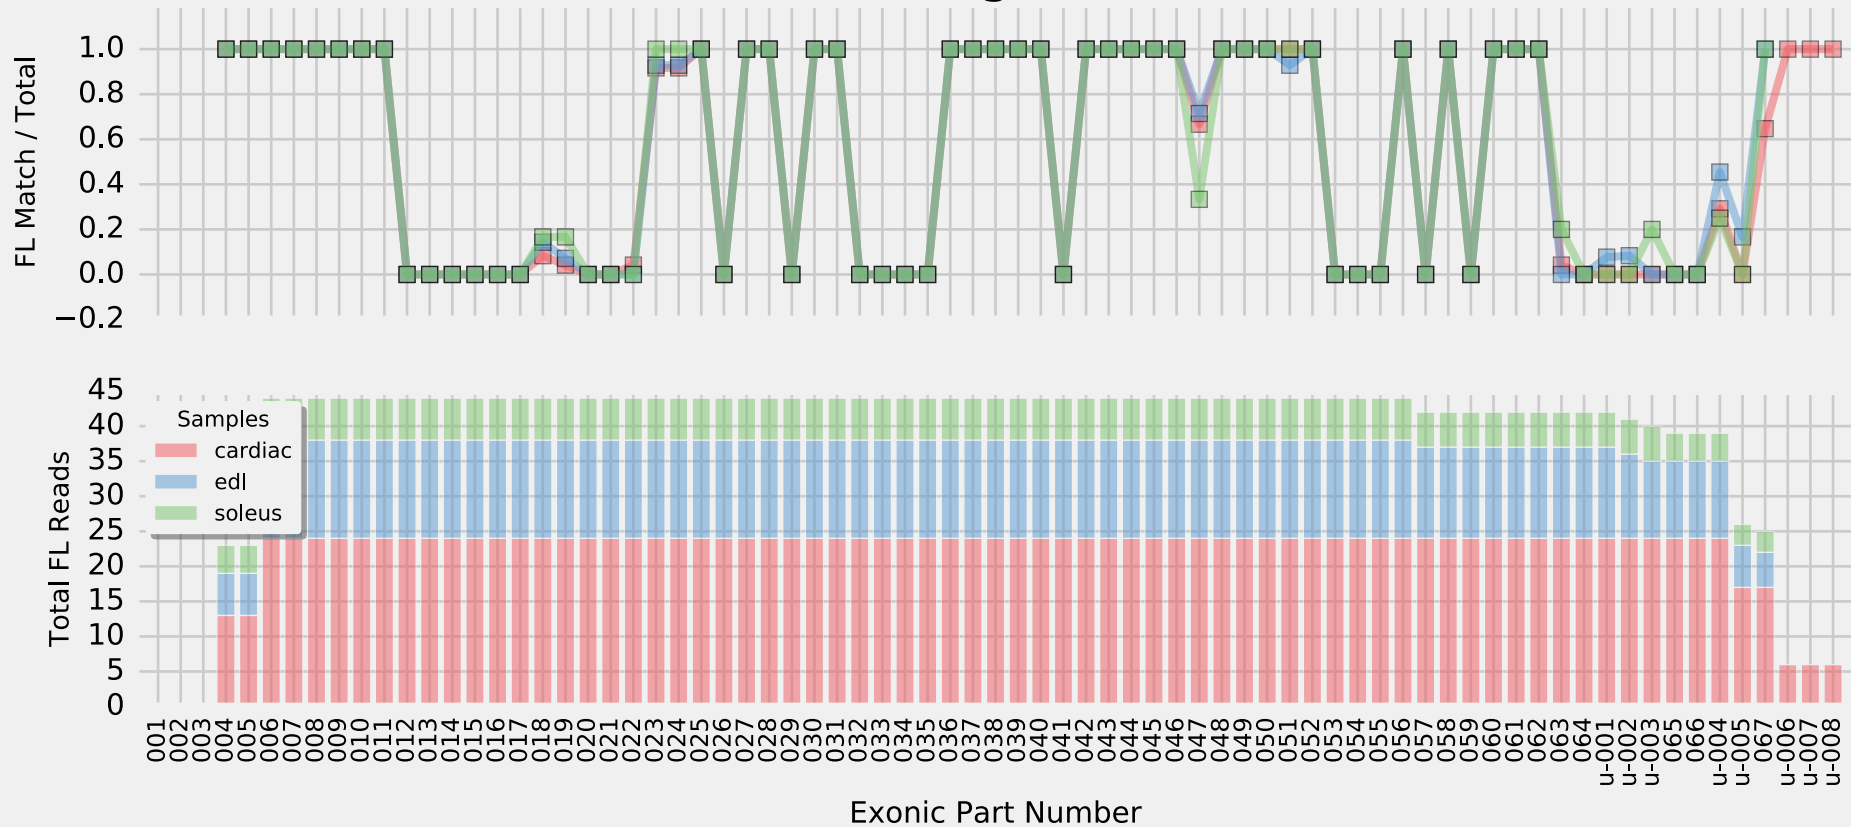

# Adprhl1

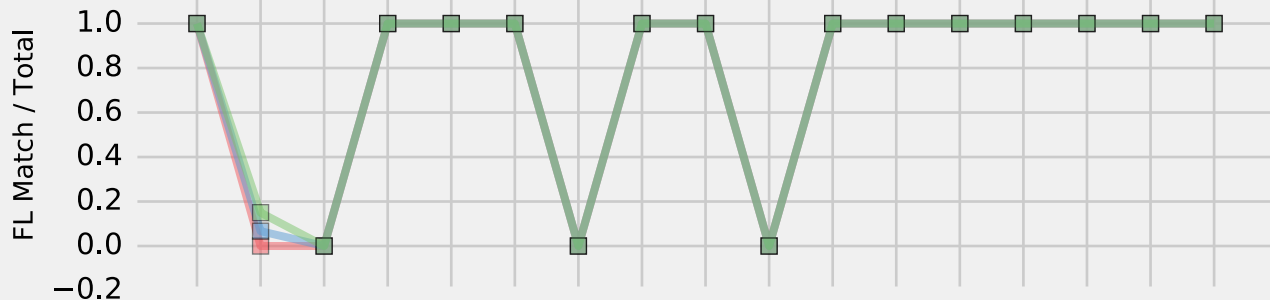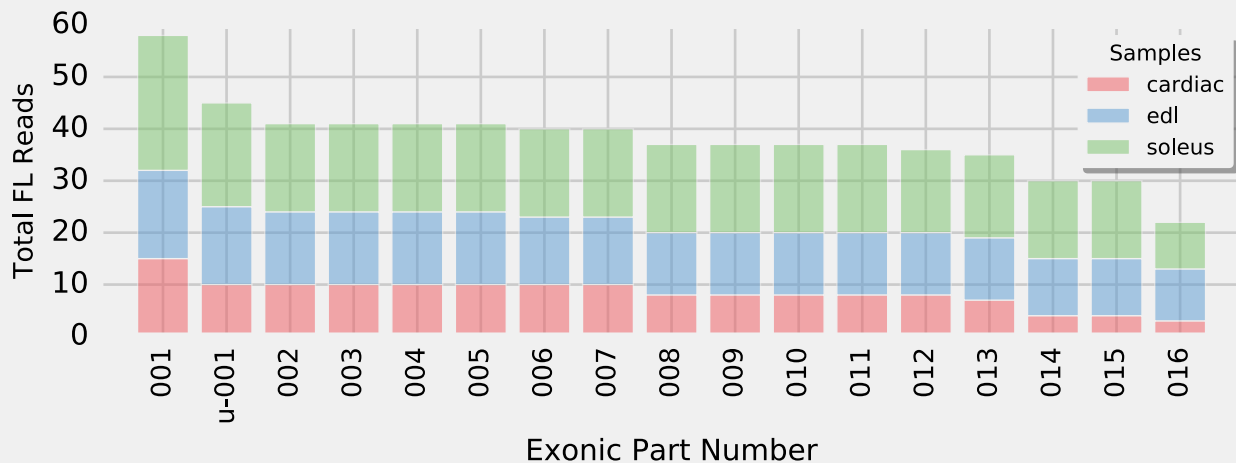

# Aff4

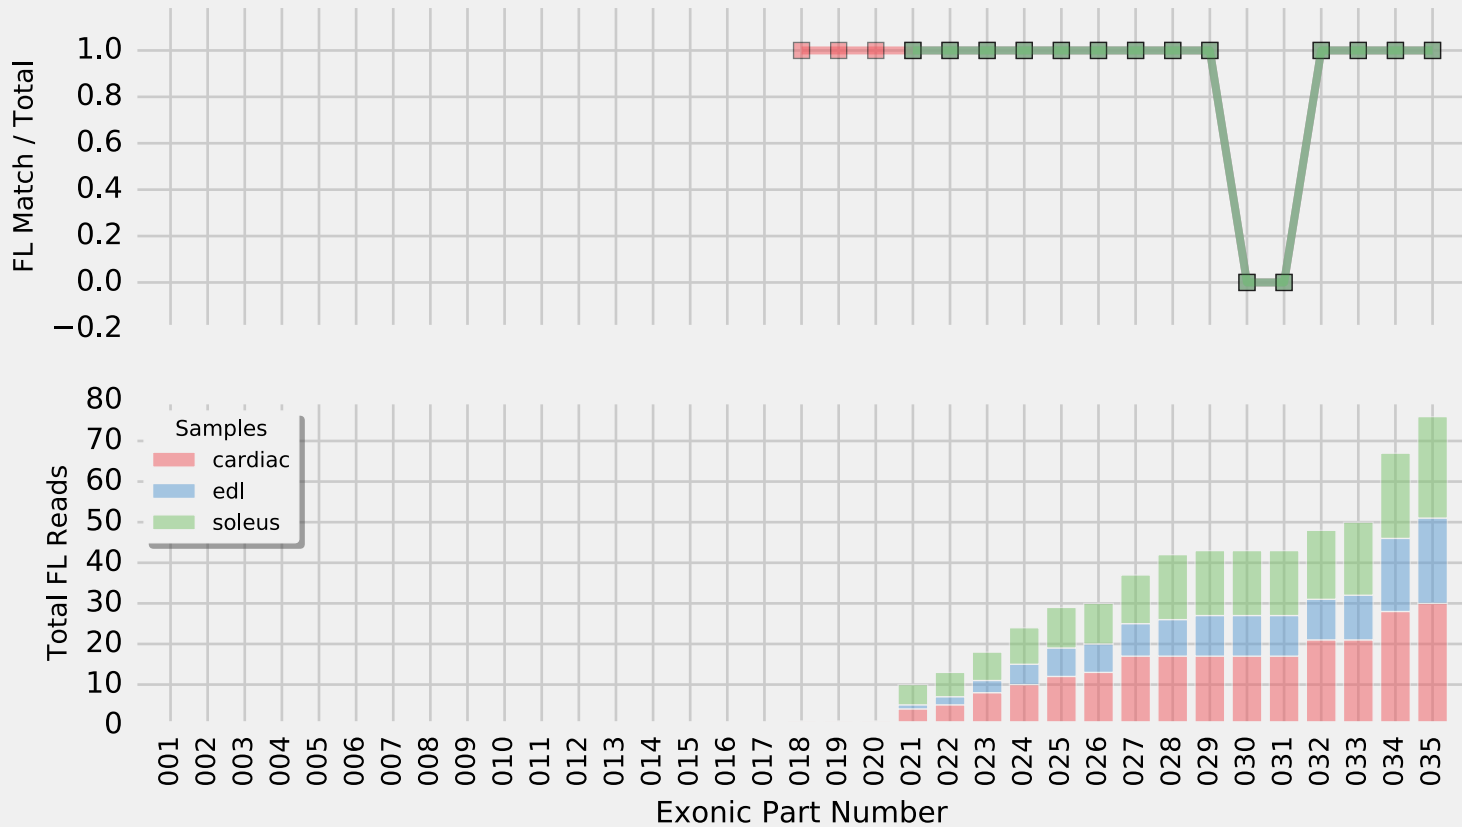

# Afg3l2

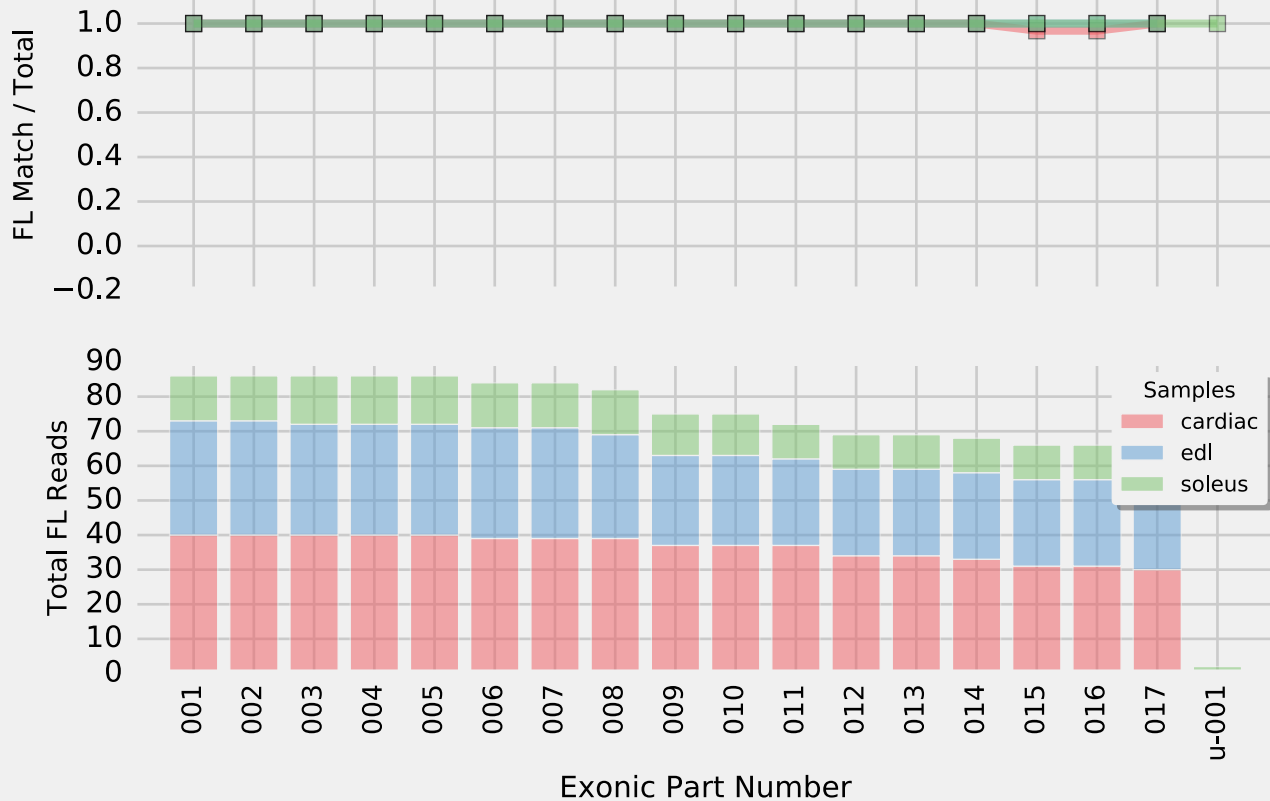

# Agbl1

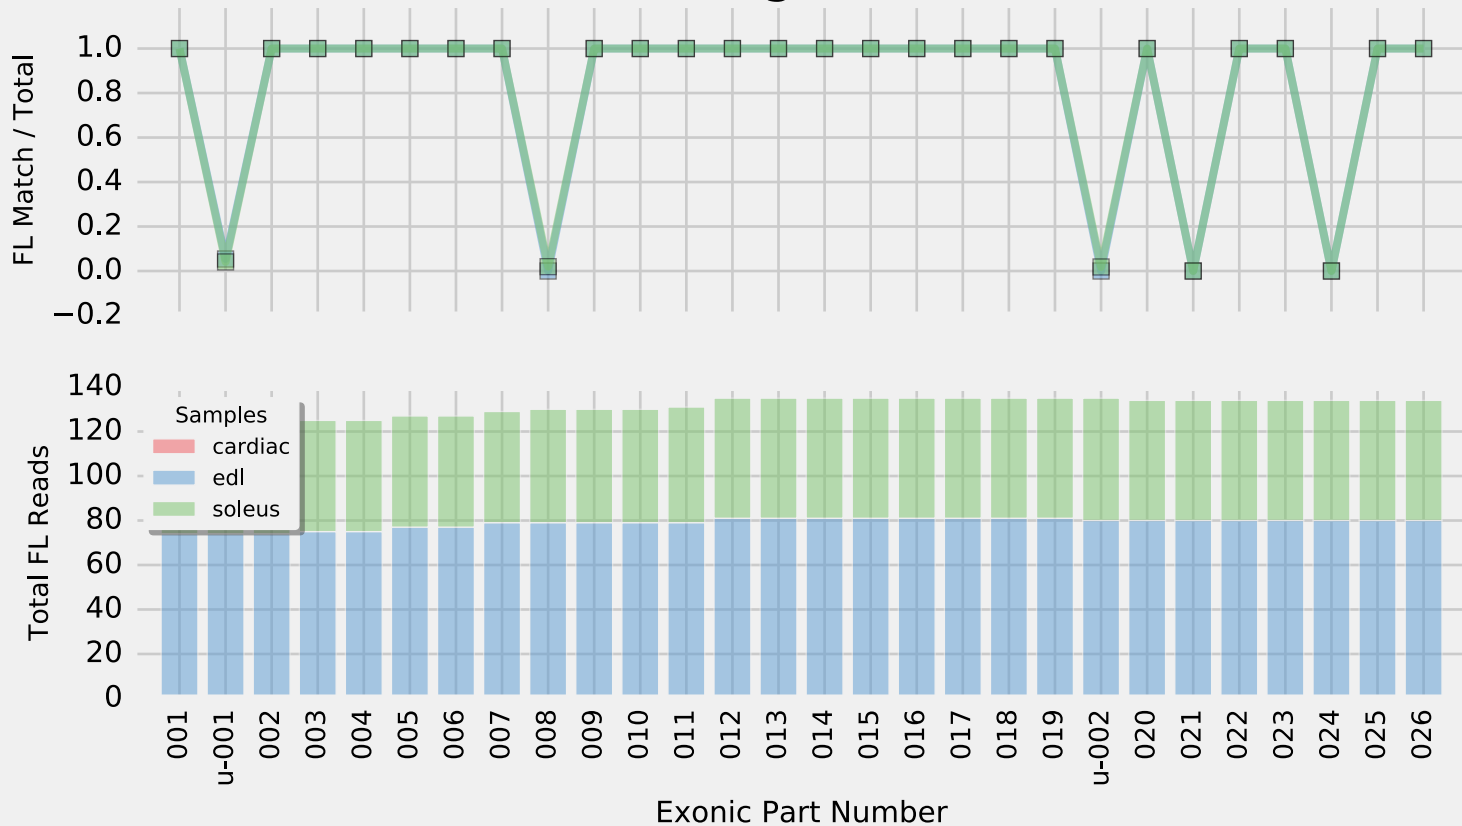



# Agl

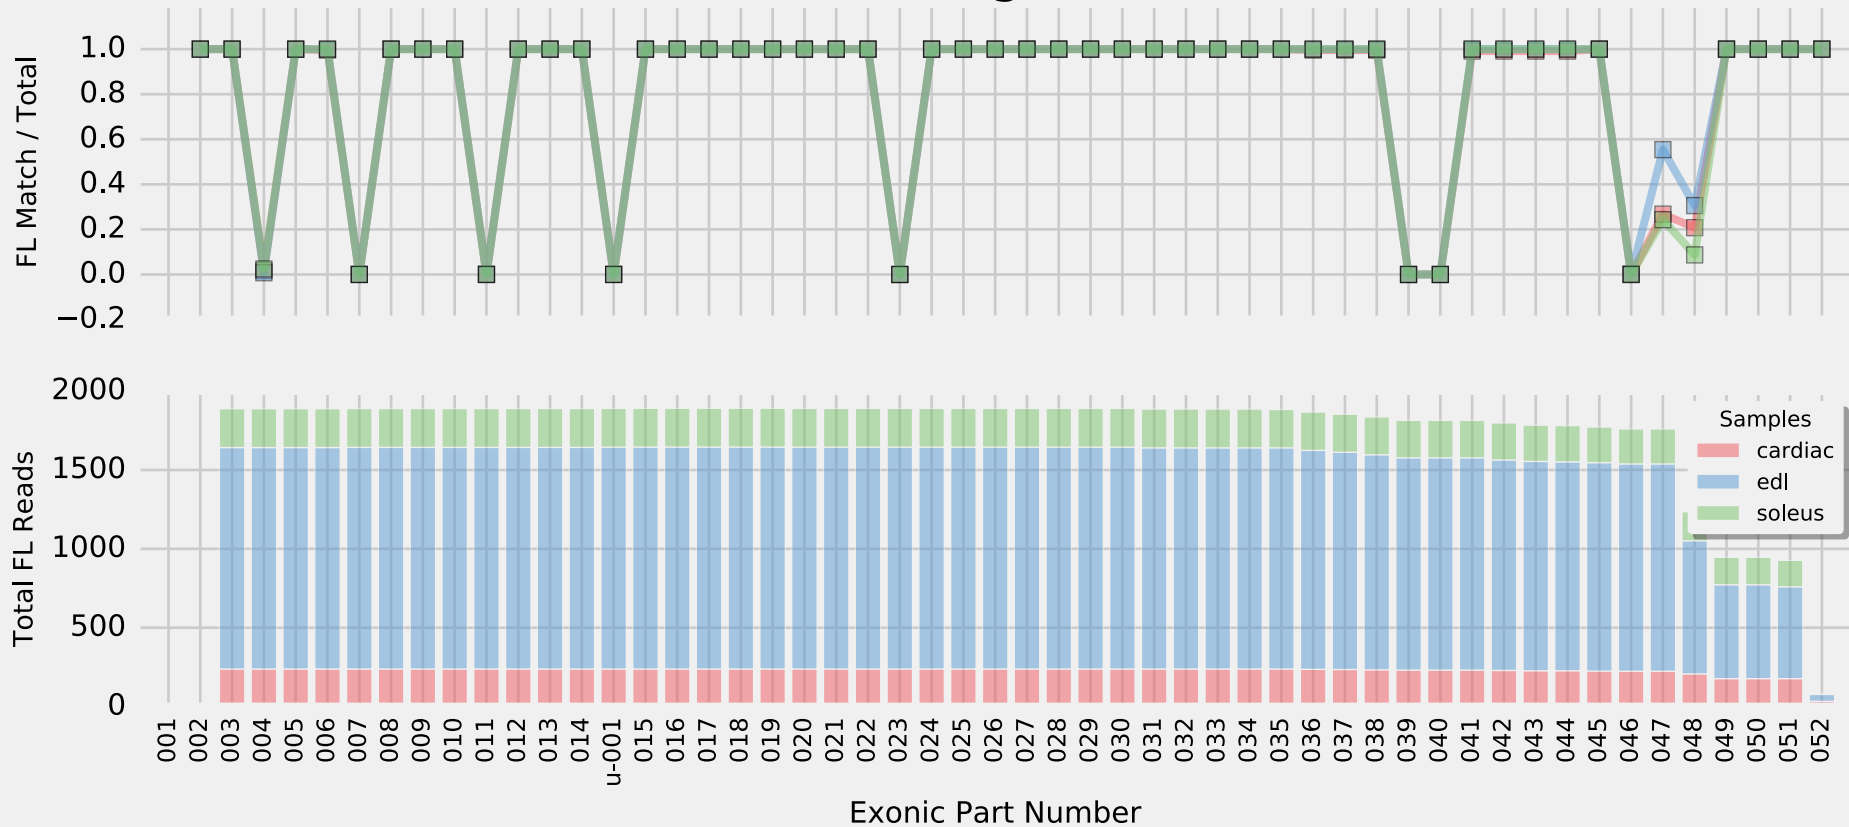

# Ago2

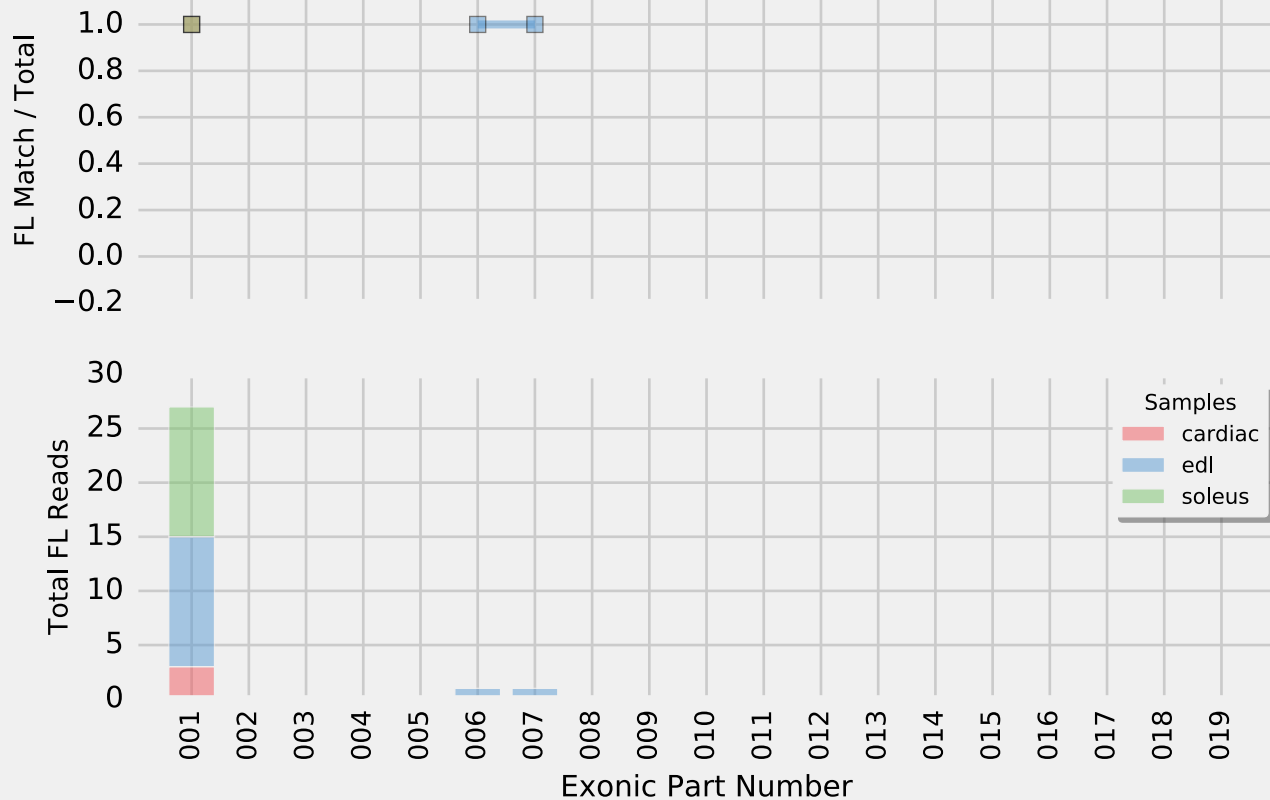

# Agpat3

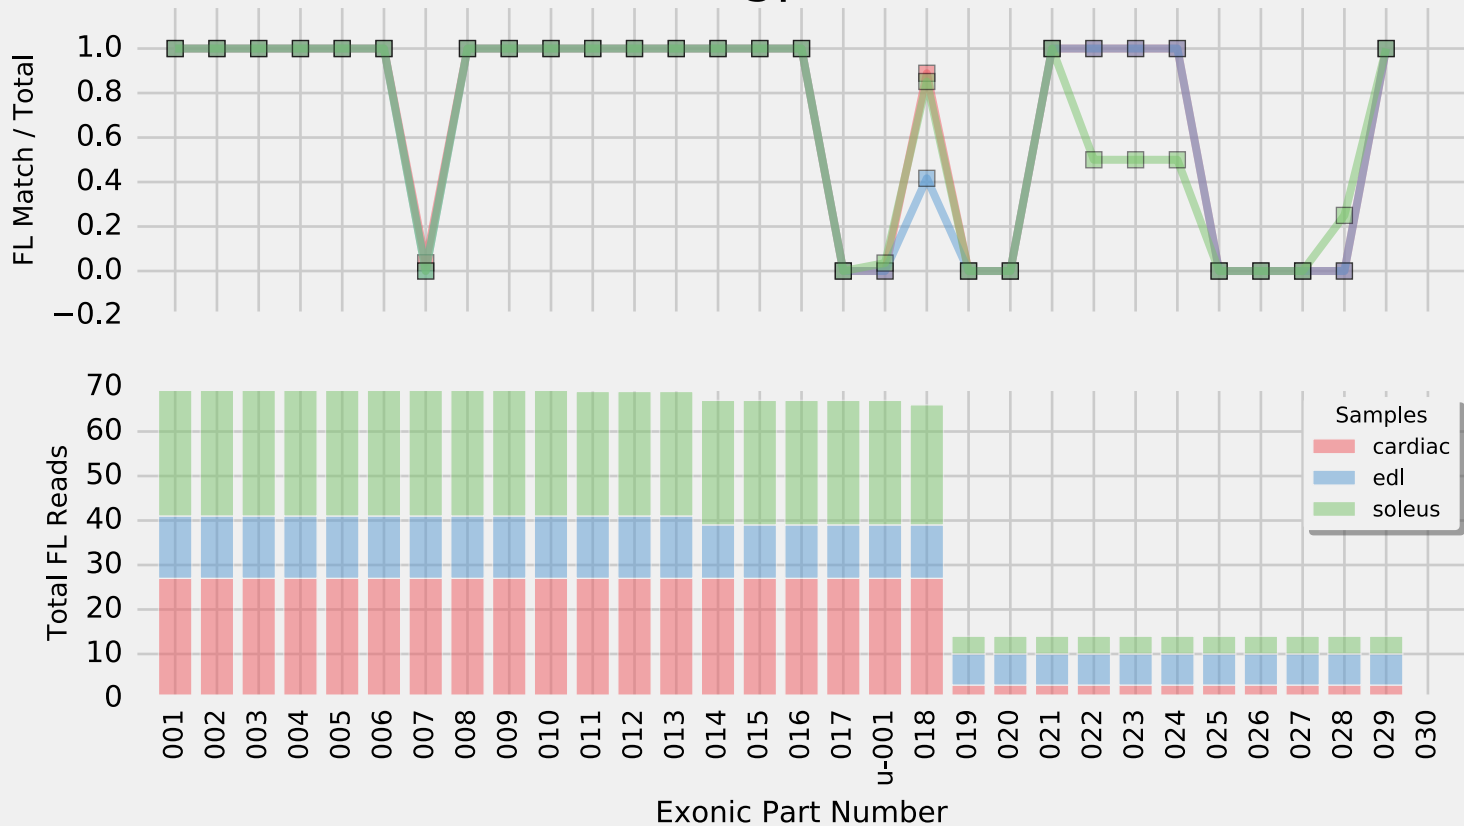

# Agps

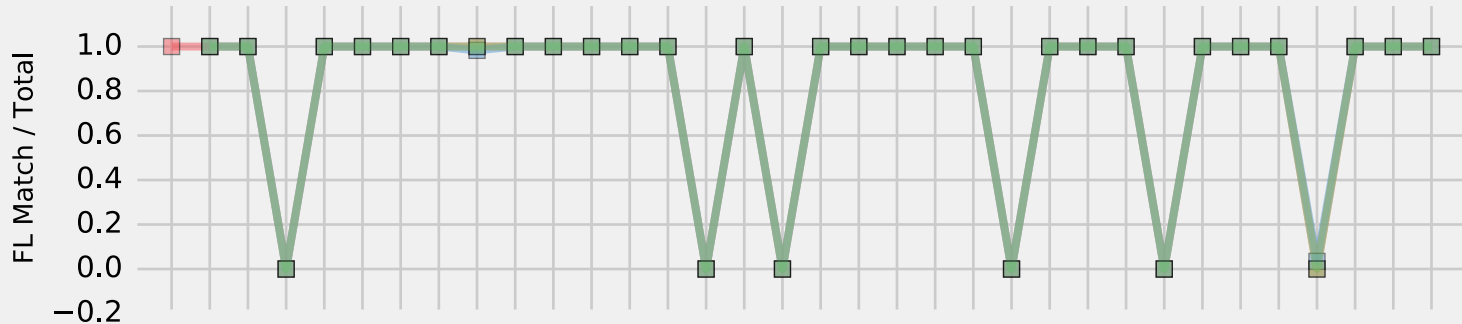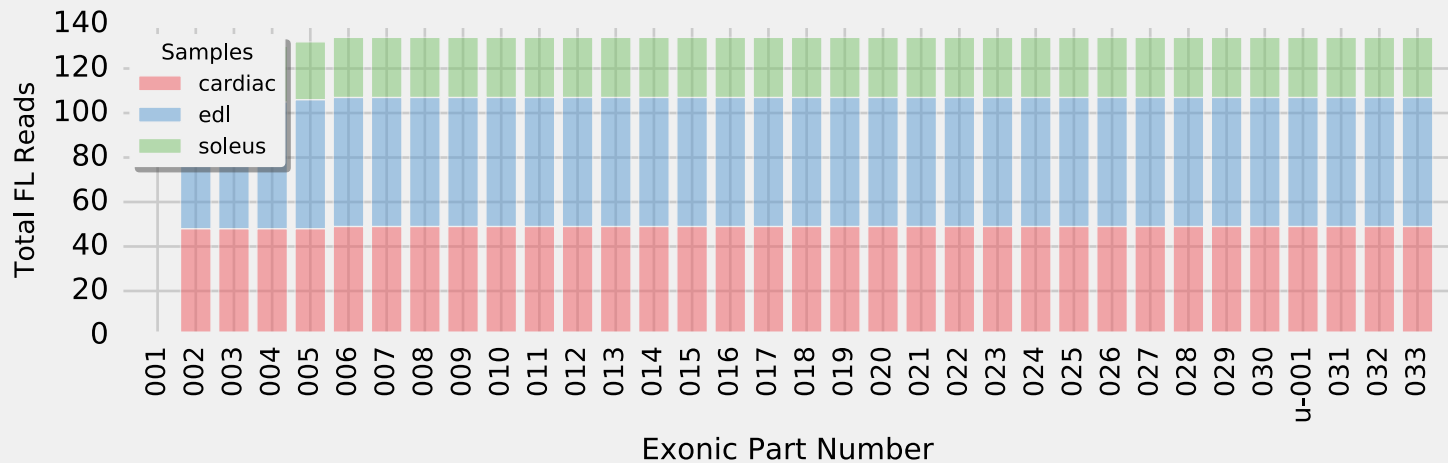

# Ahdhc1

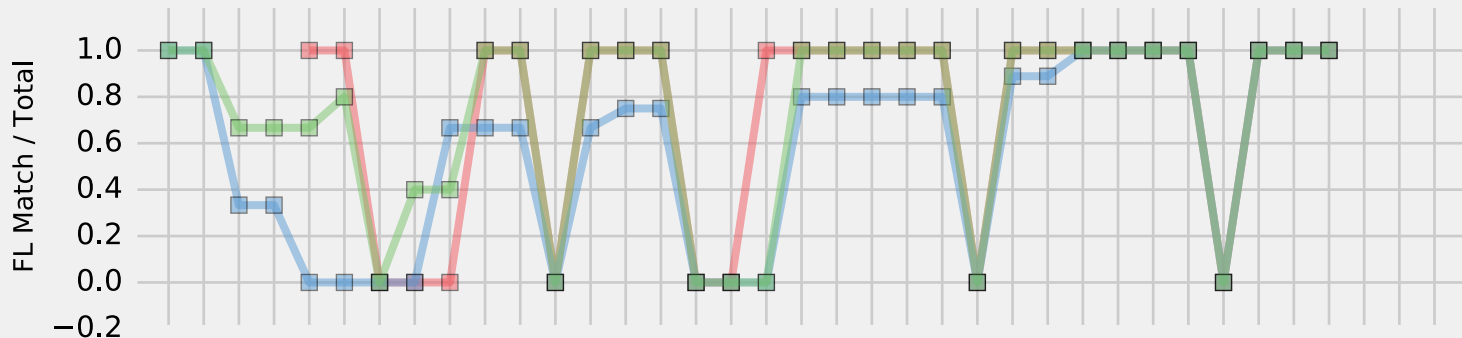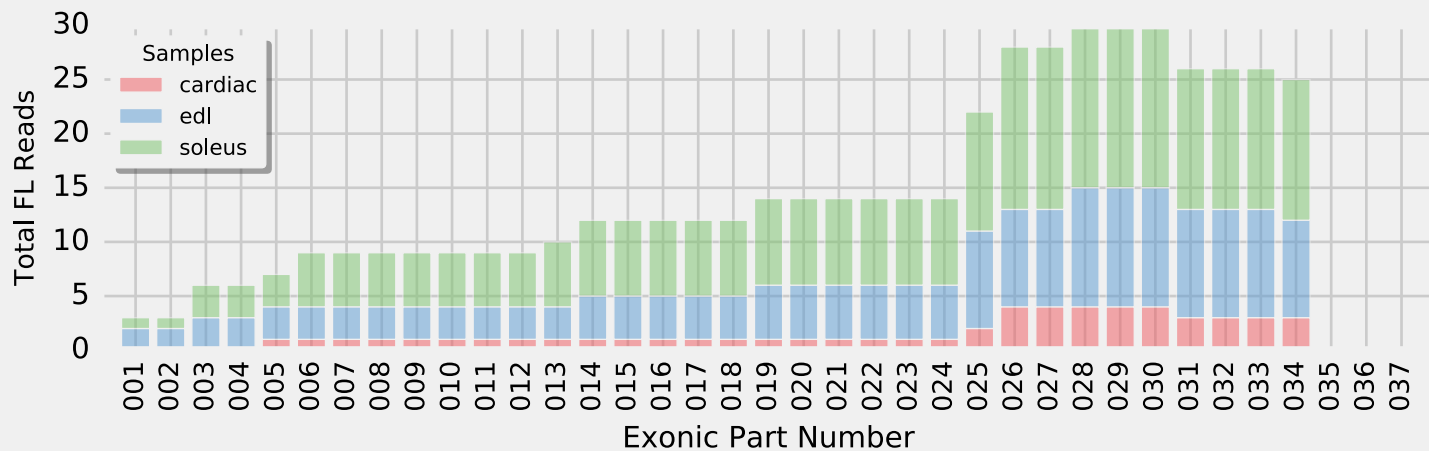

# Ahnak

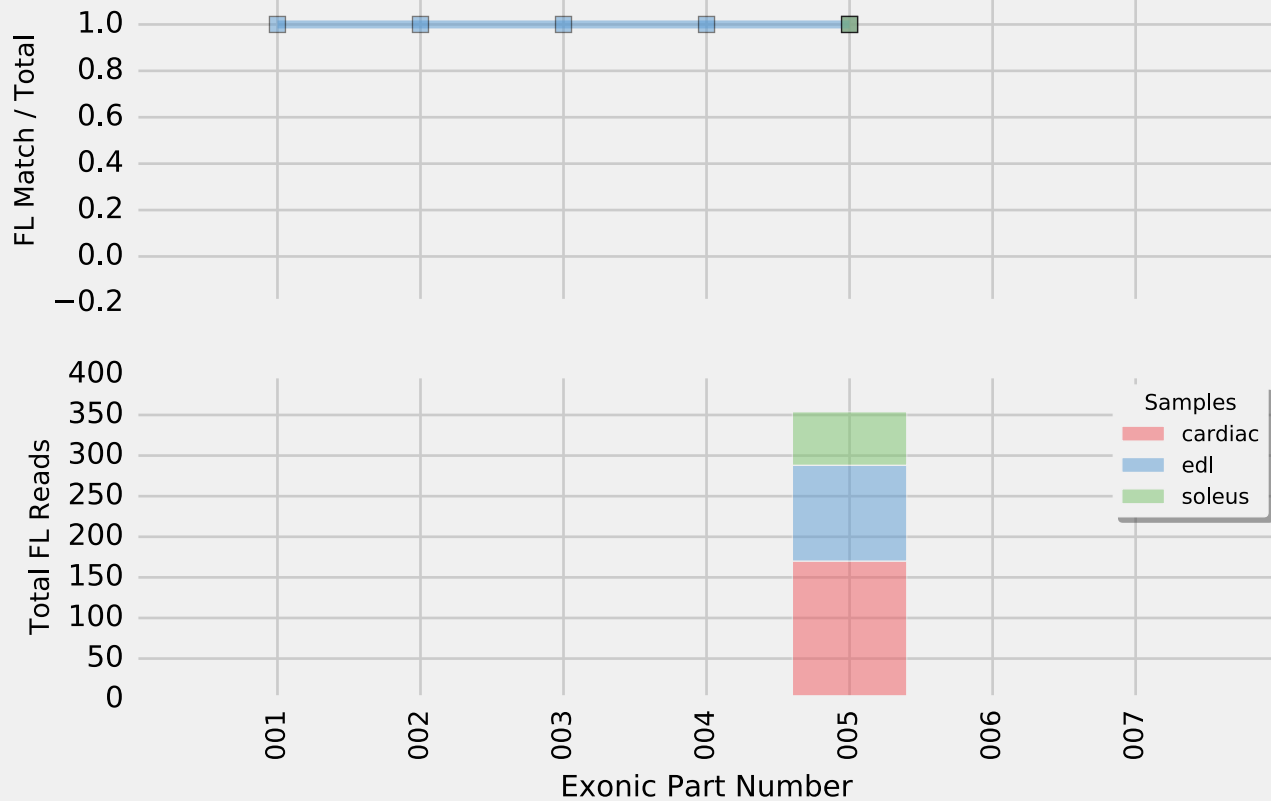

# Akap12

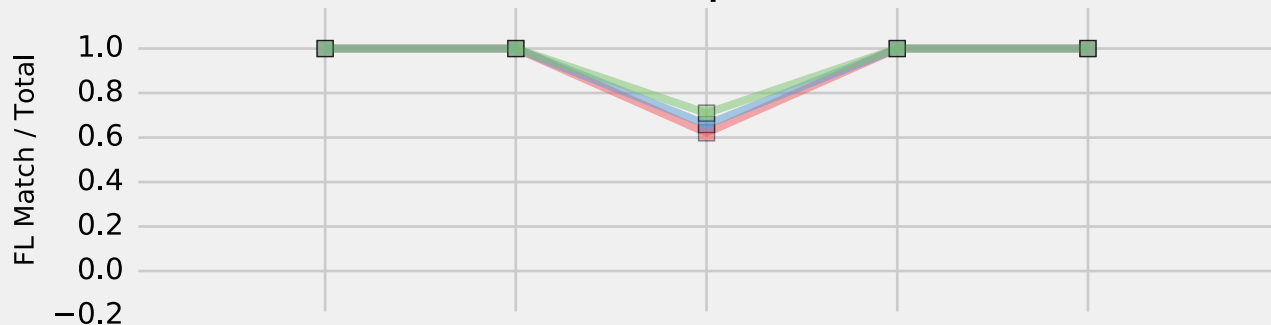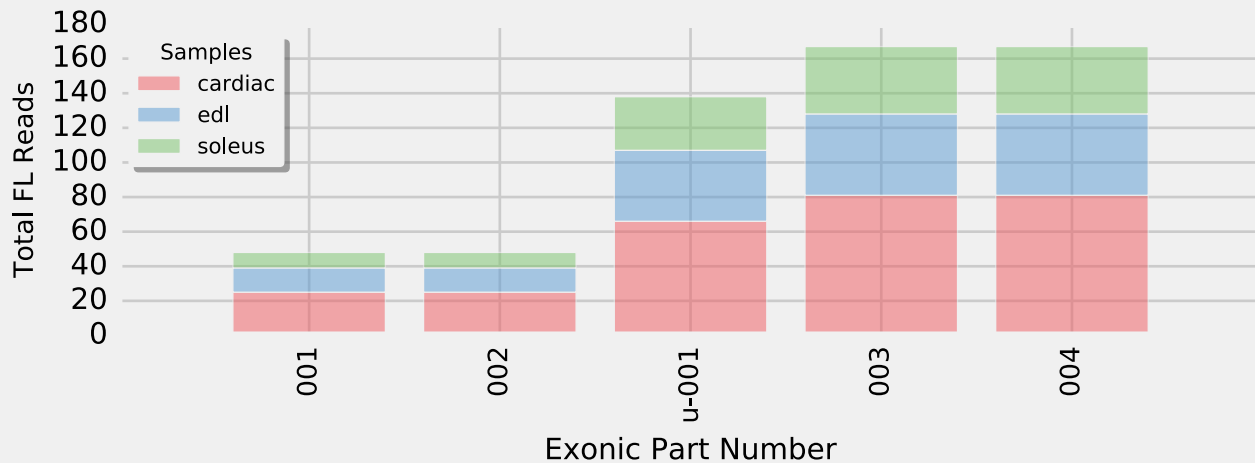

# Akap13

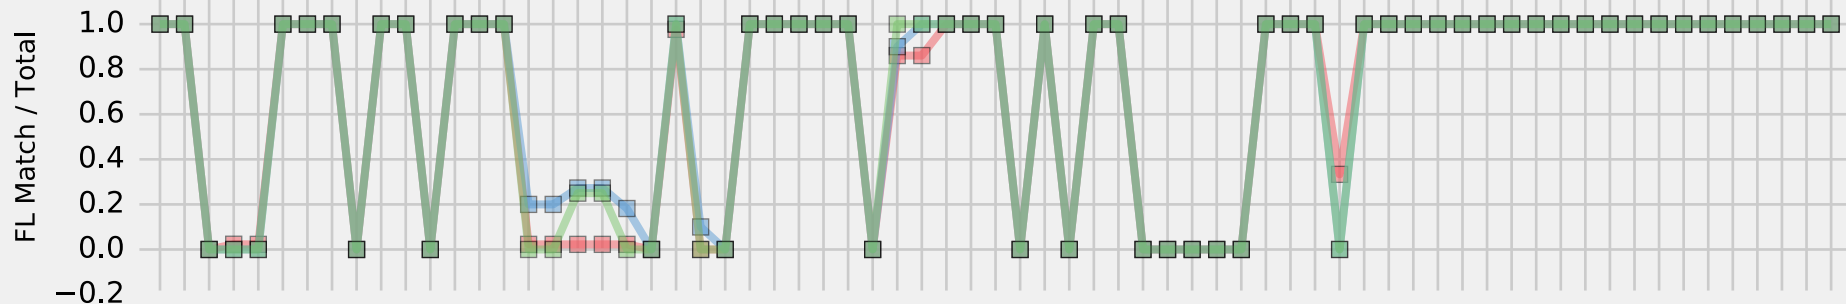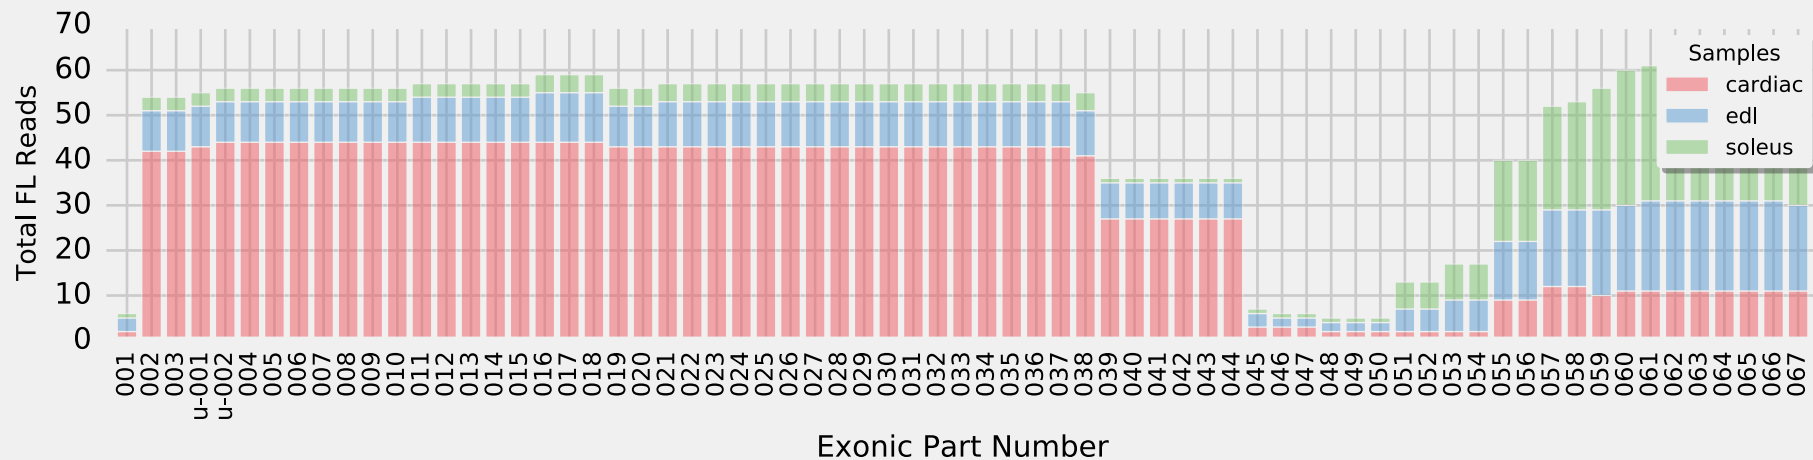



# Akap6

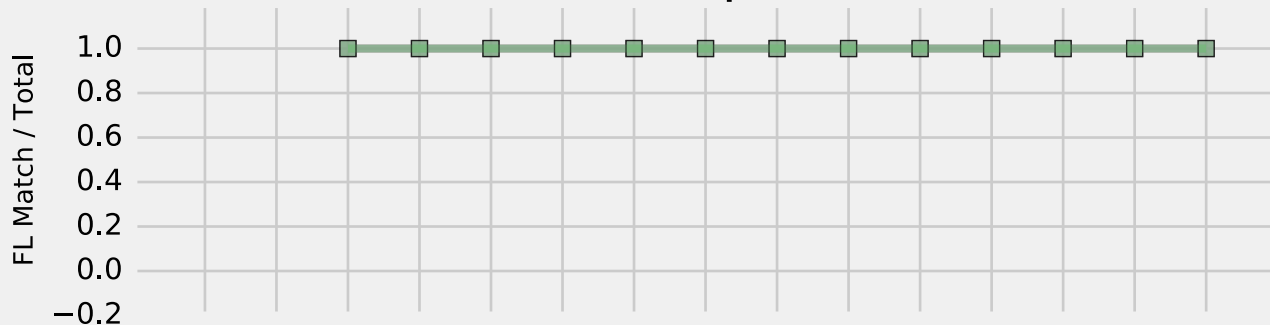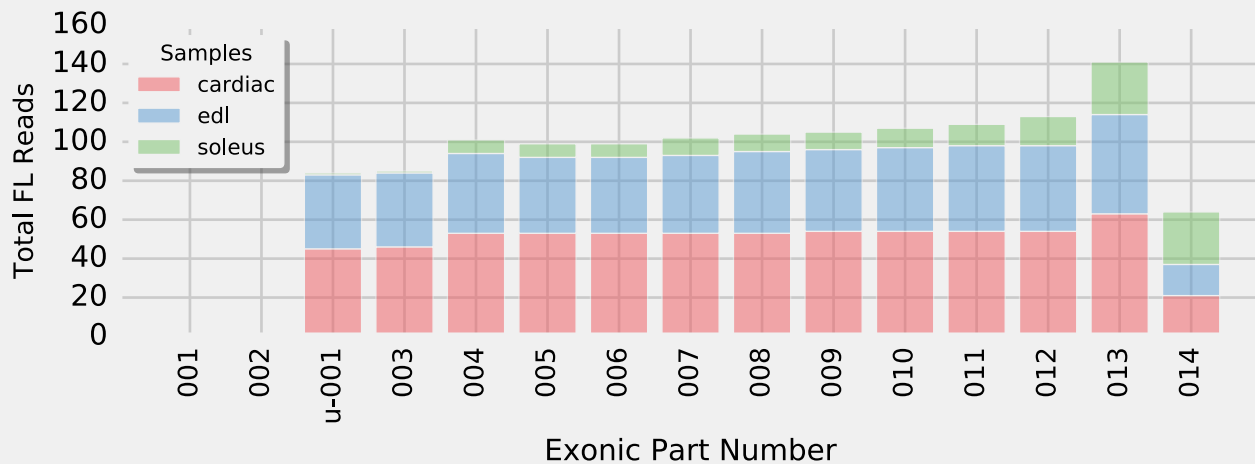

# Akap9

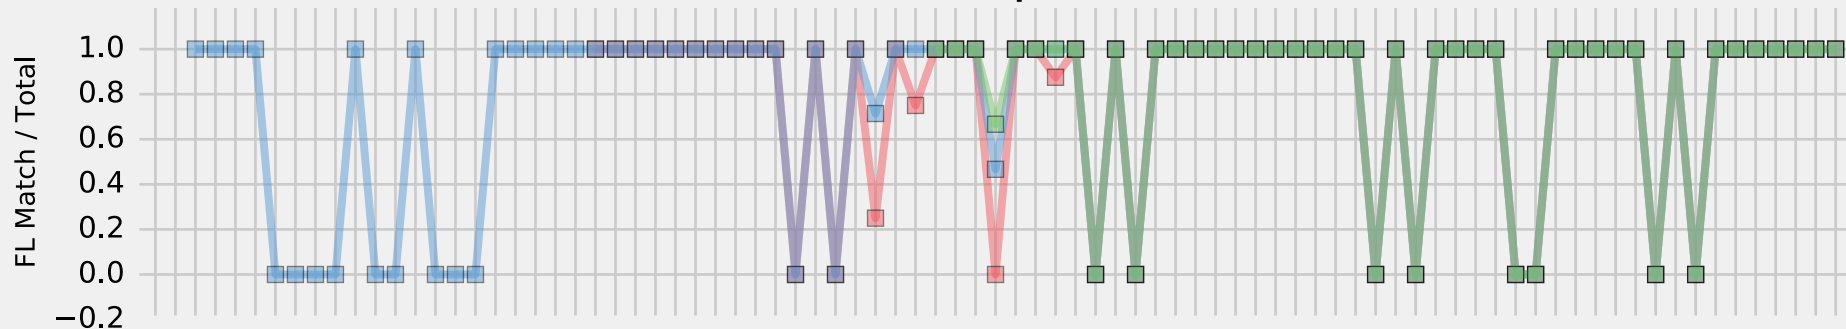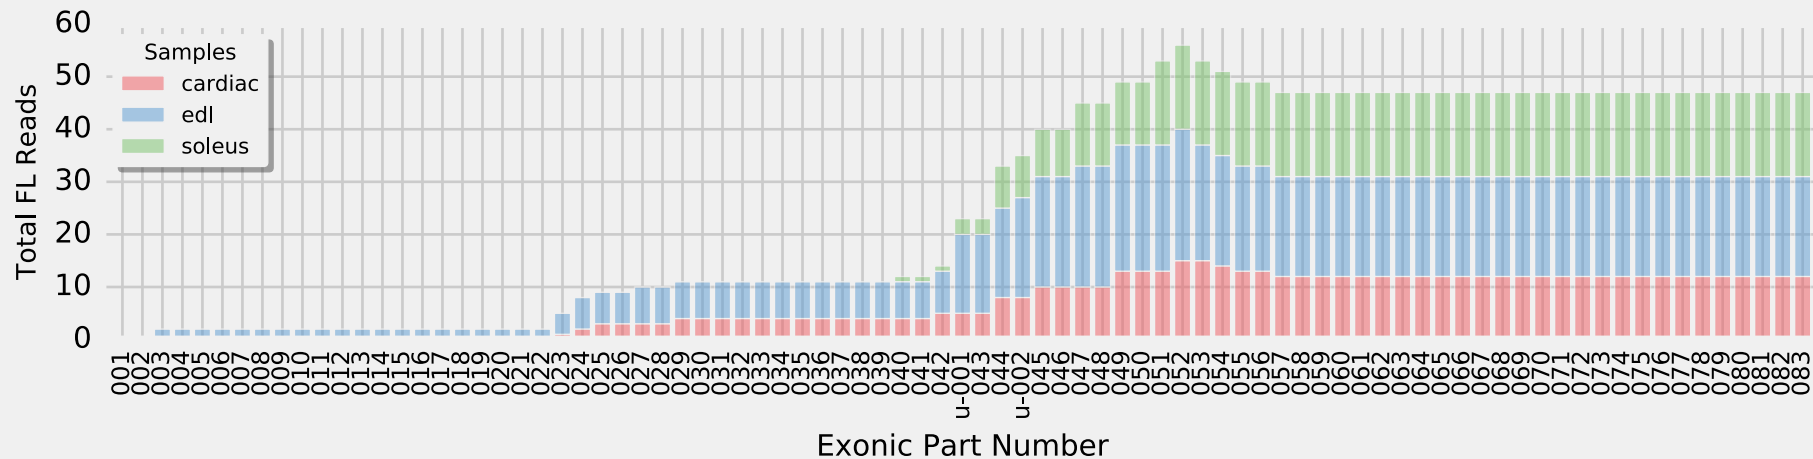

# Alpk2

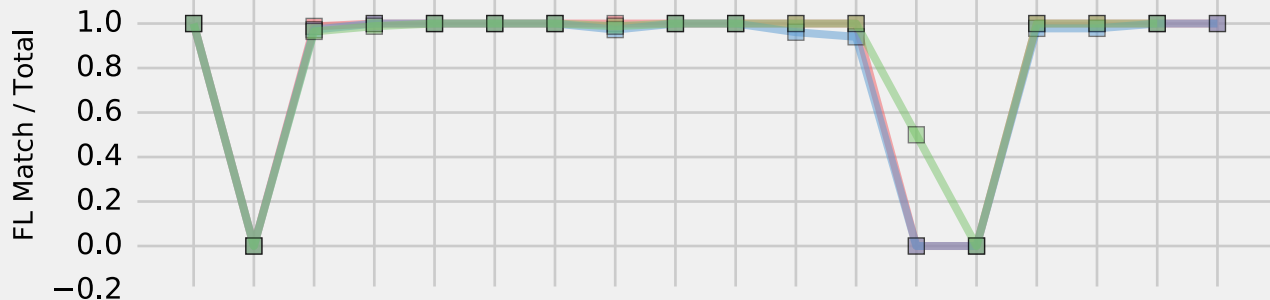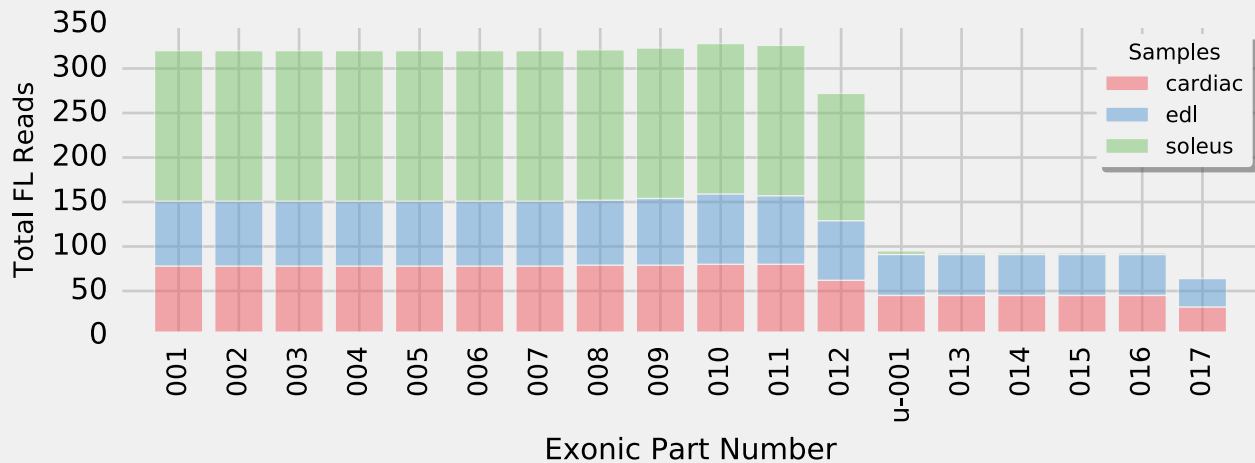

# Alpk3

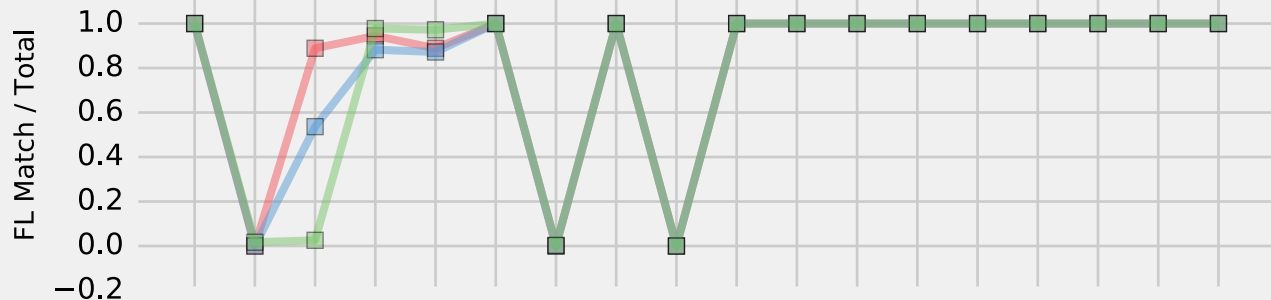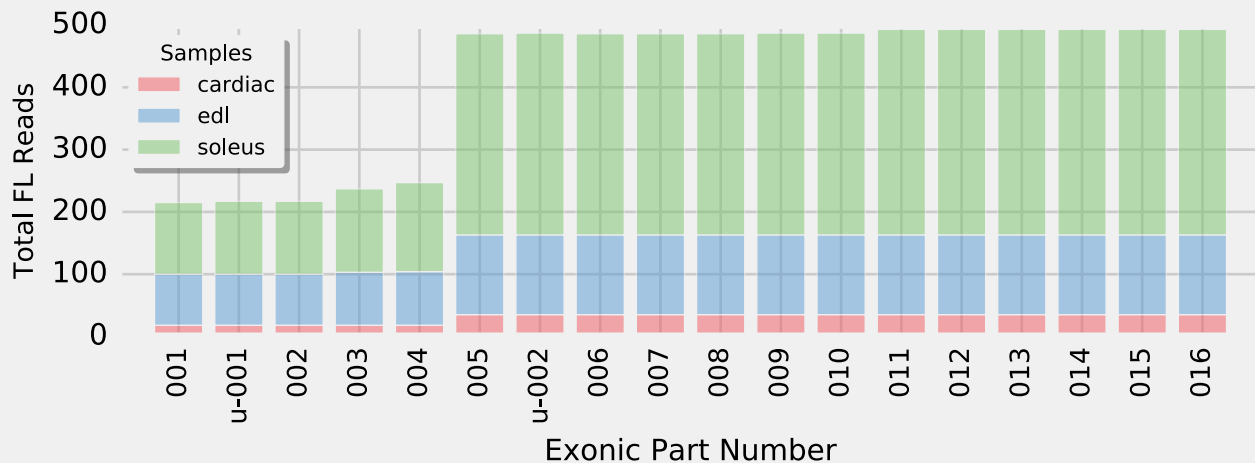

# Amot

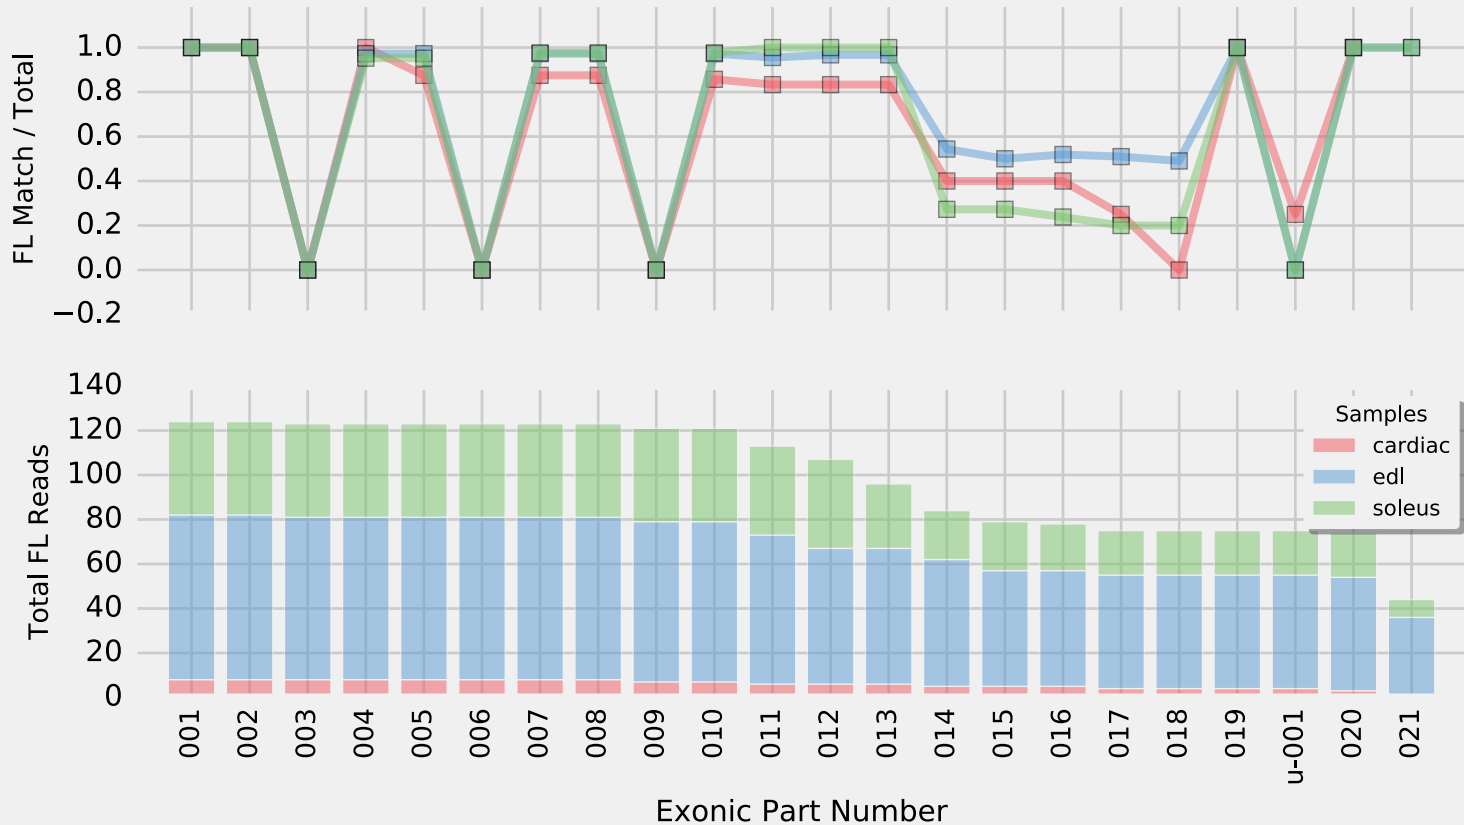

# Amotl1

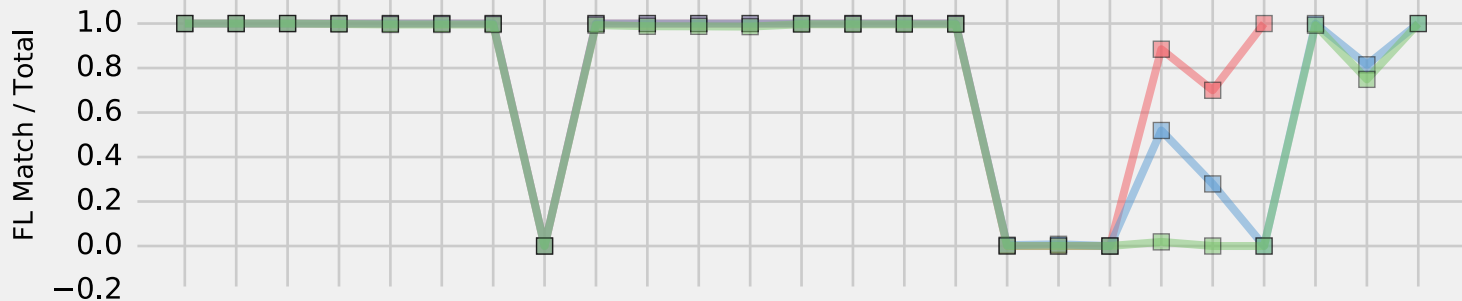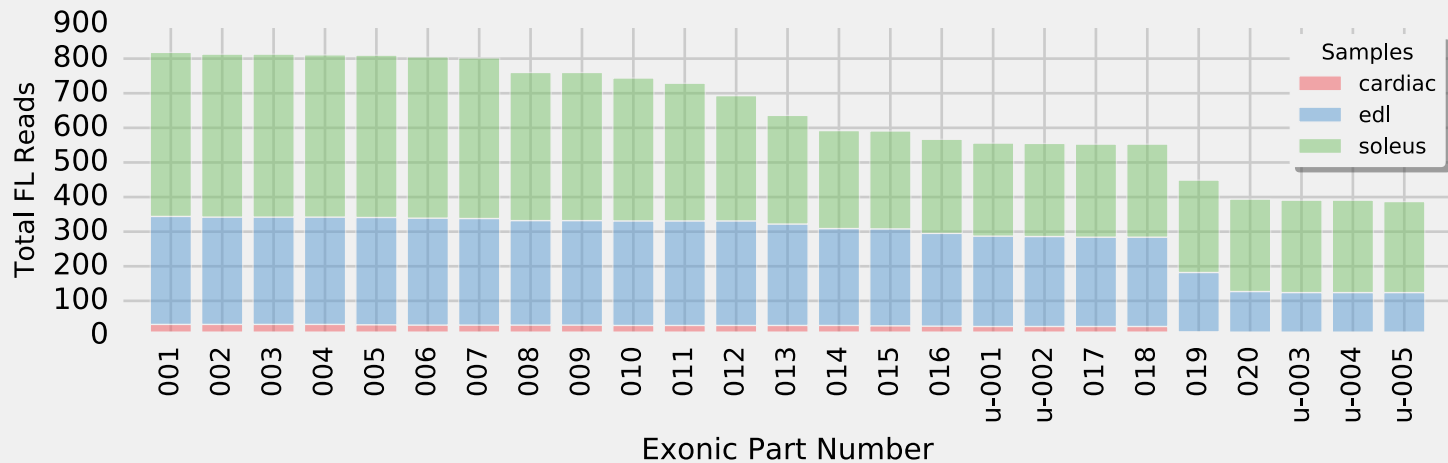

# Anapc1

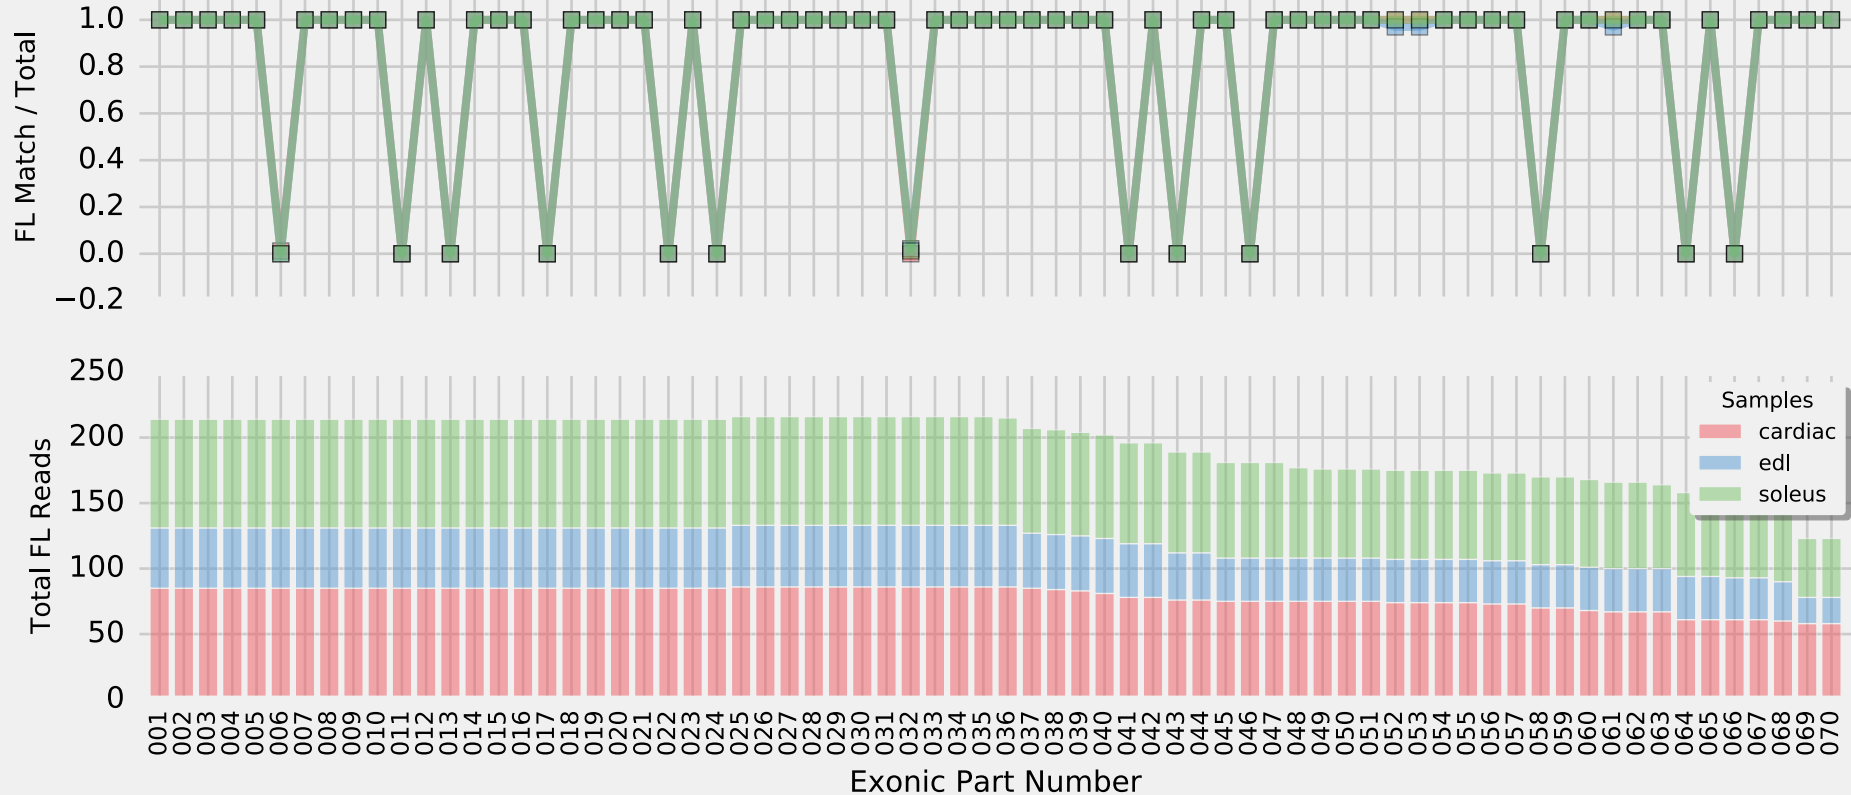

# Ank3

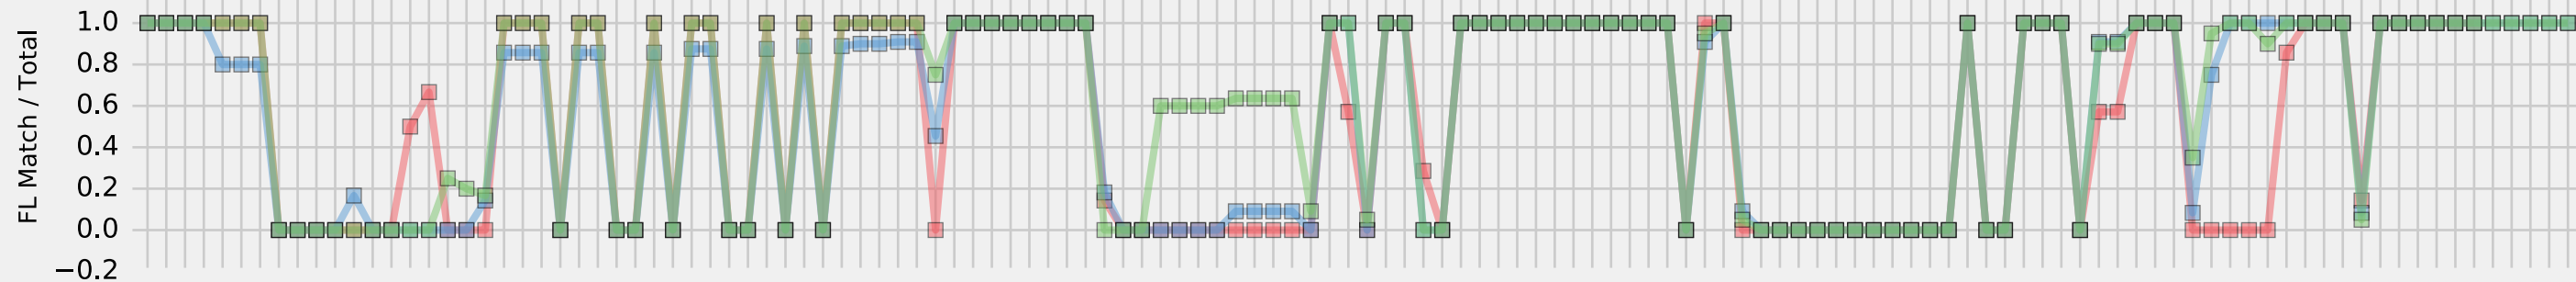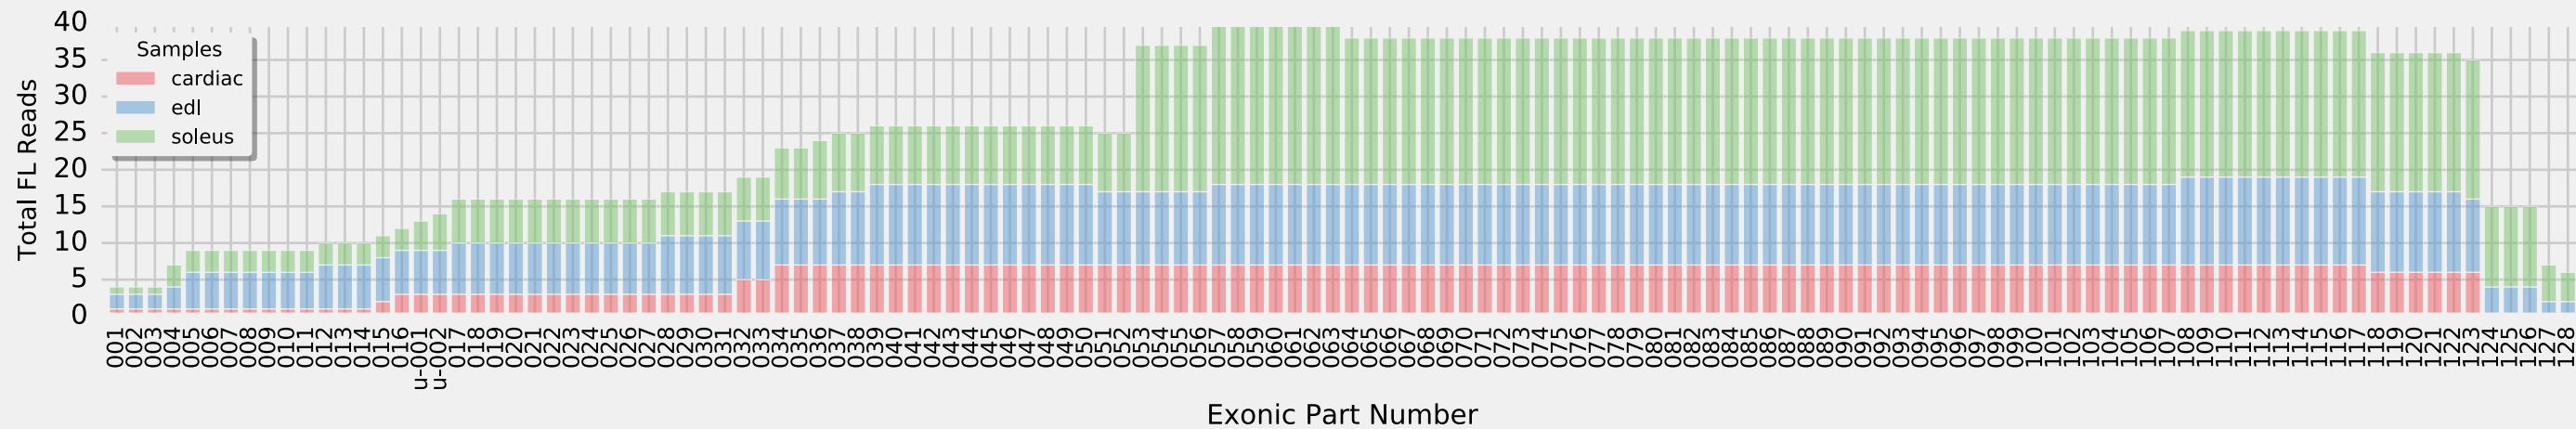



# Ankfy1

FL Match / Total

1.0  
0.8  
0.6  
0.4  
0.2  
0.0  
-0.2

Total FL Reads

80  
70  
60  
50  
40  
30  
20  
10  
0

Samples

cardiac

edl

soleus

Exonic Part Number

001 002 003 004 005 006 007 008 009 010 011 012 013 014 015 016 017 018 019 020 021 022 023 024 025 026 027 028 029 030 031 032

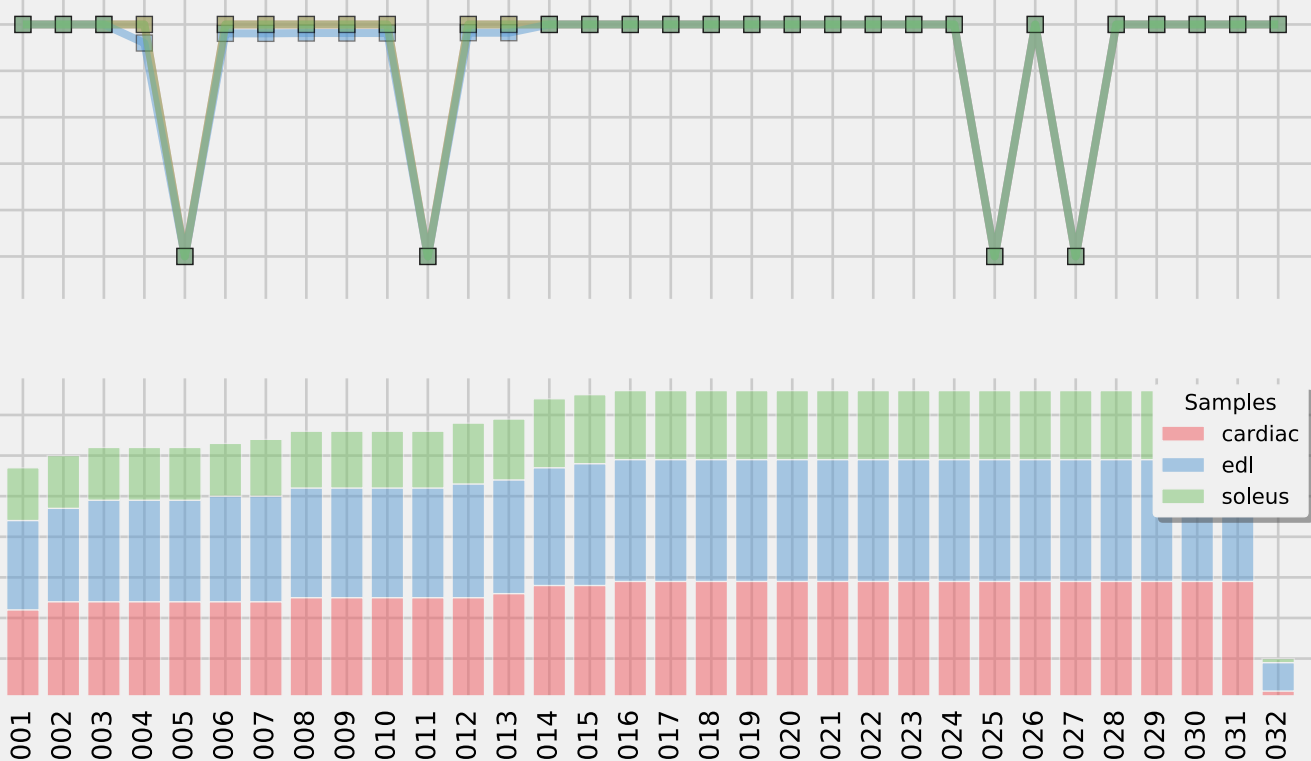

# Ankrd28

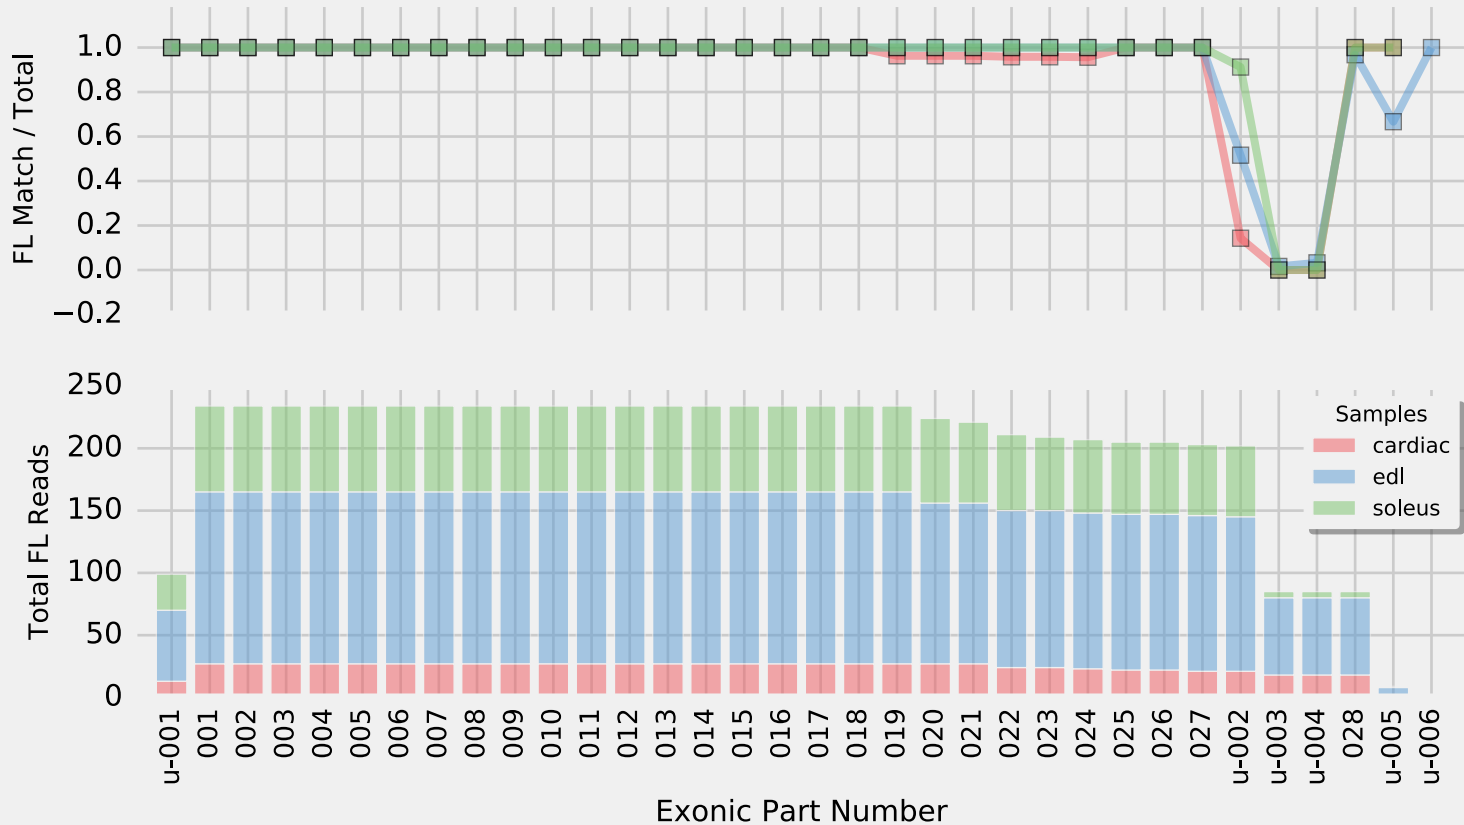

# Ankrd33b

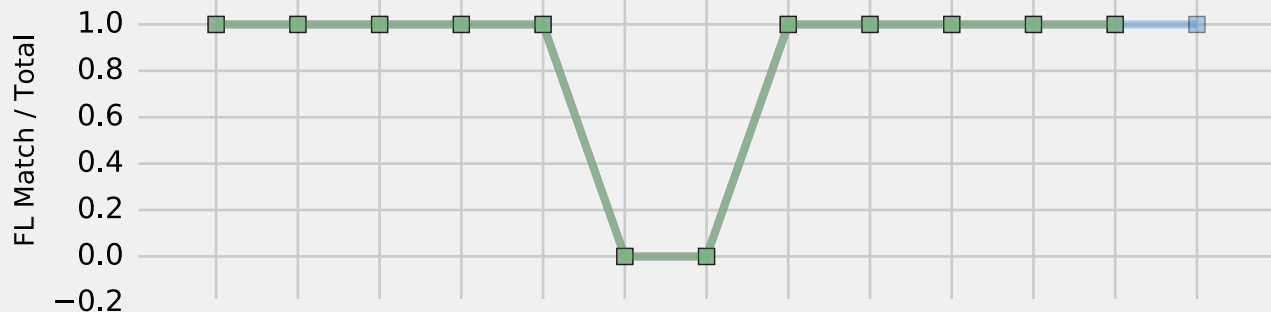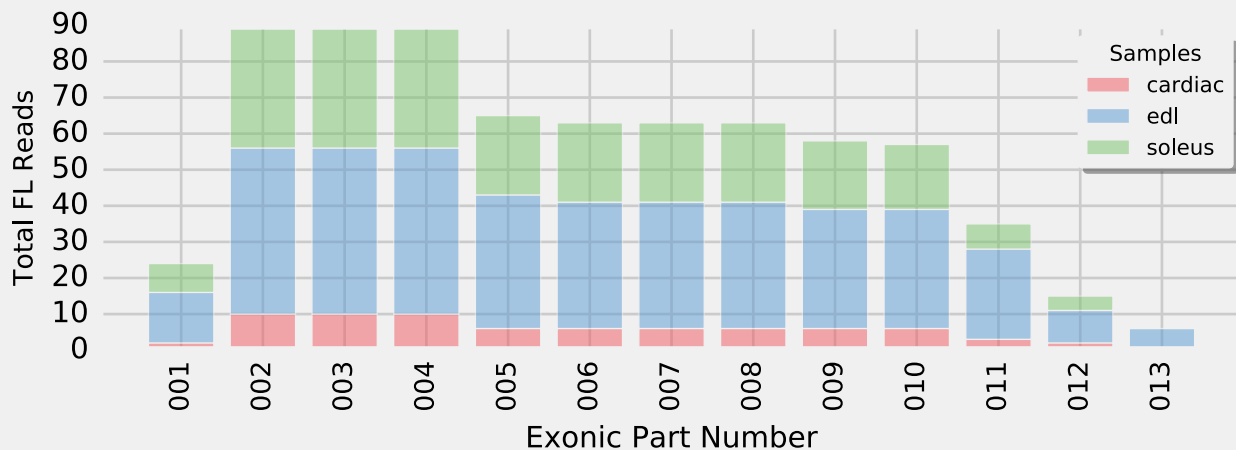

# Ankrd50

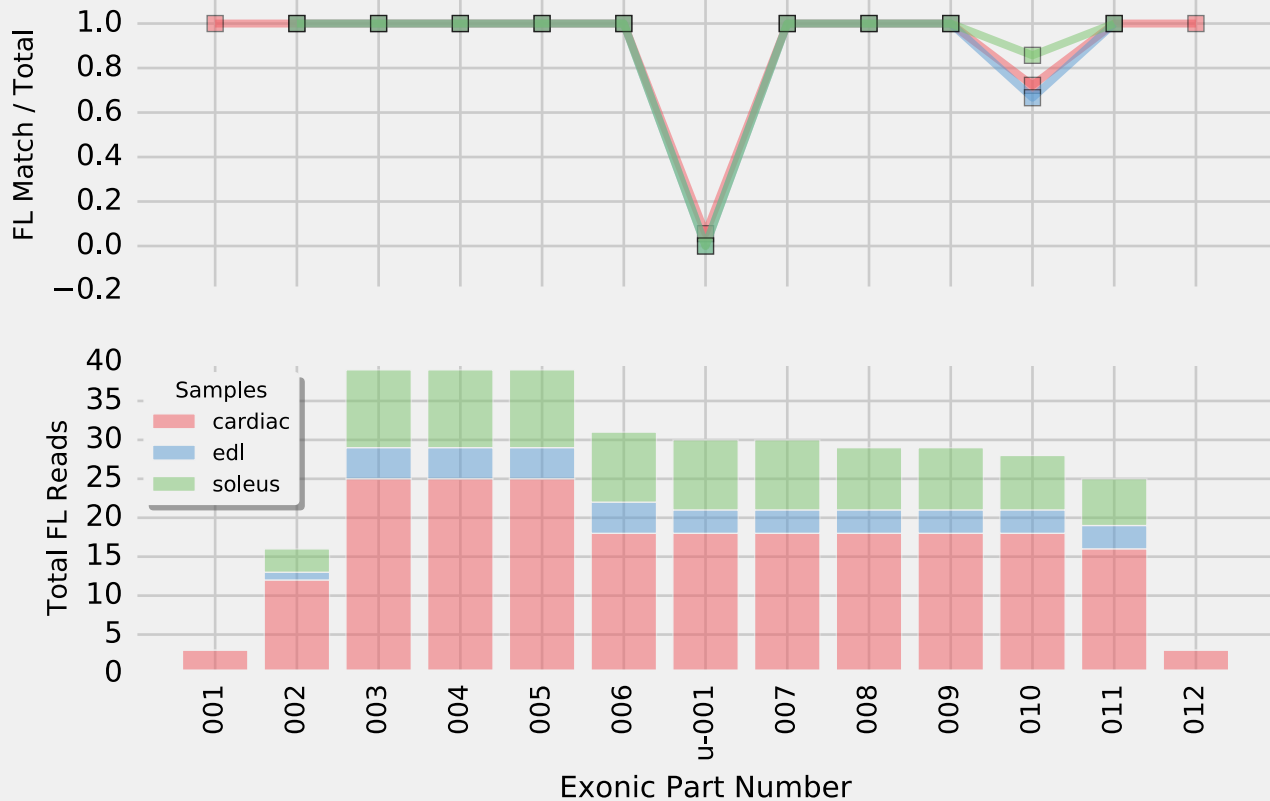

# Anks1

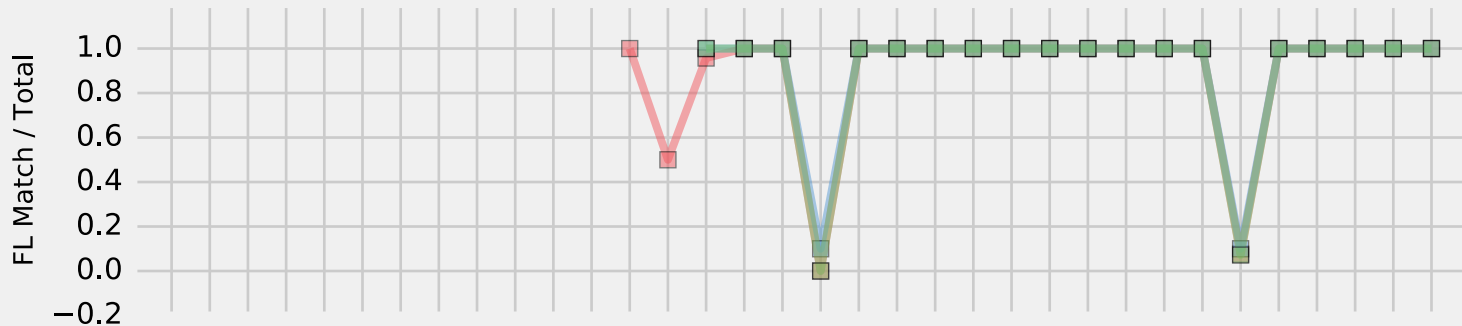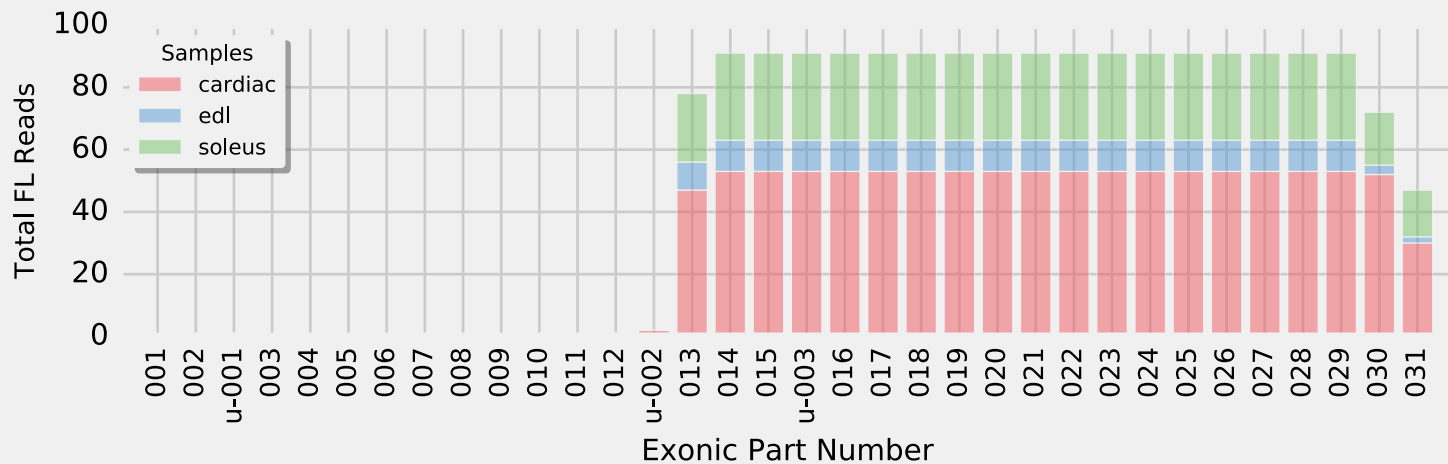

# Ano5

FL Match / Total

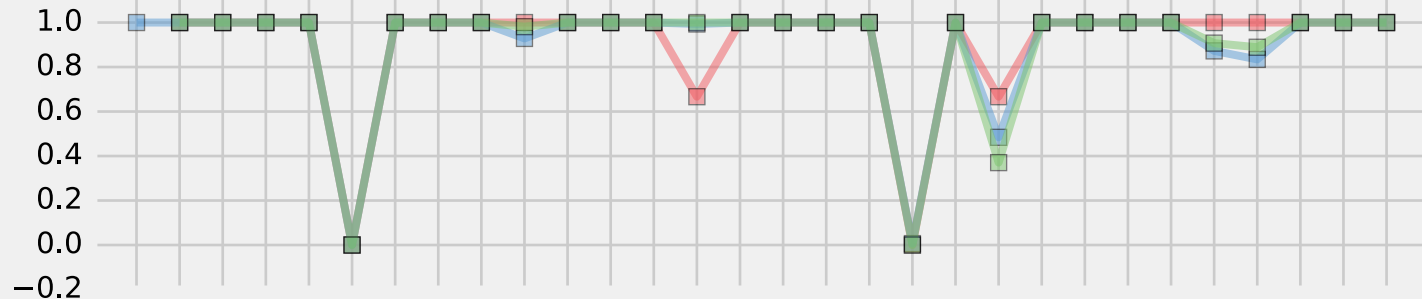

Total FL Reads

Samples  
cardiac  
edl  
soleus

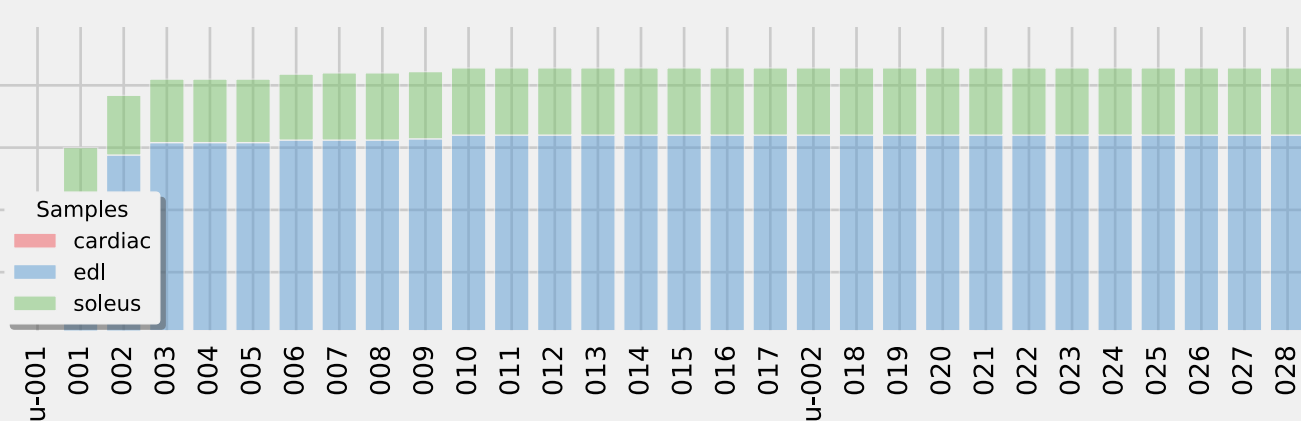

Exonic Part Number

# Ano6

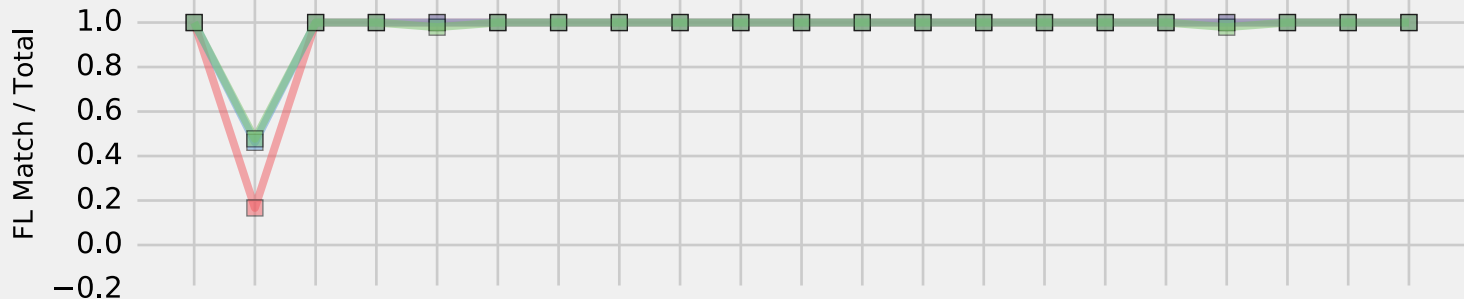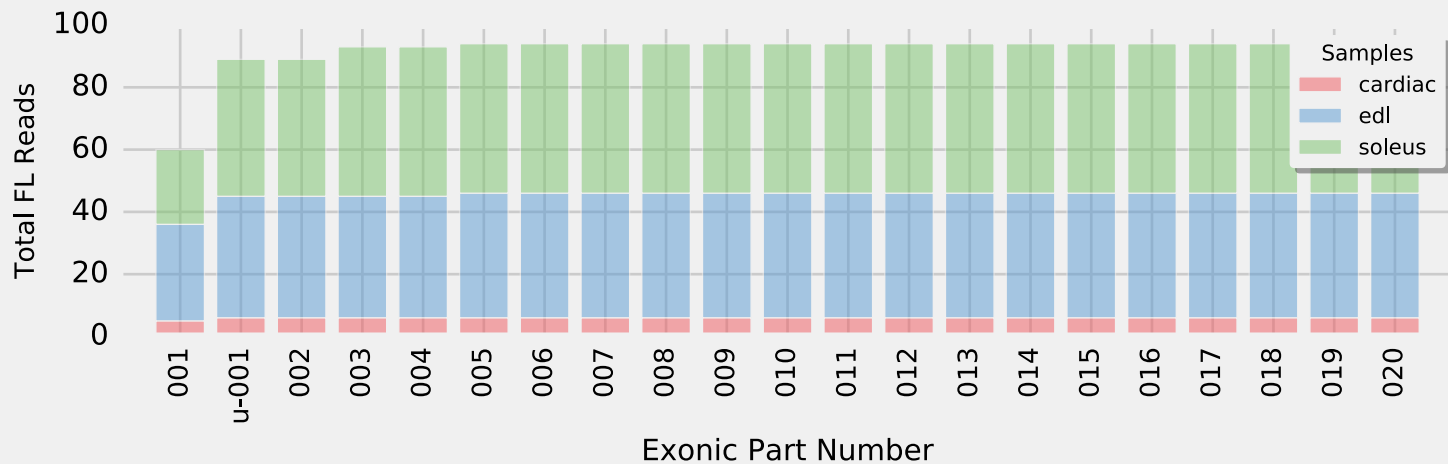

# Antxr2

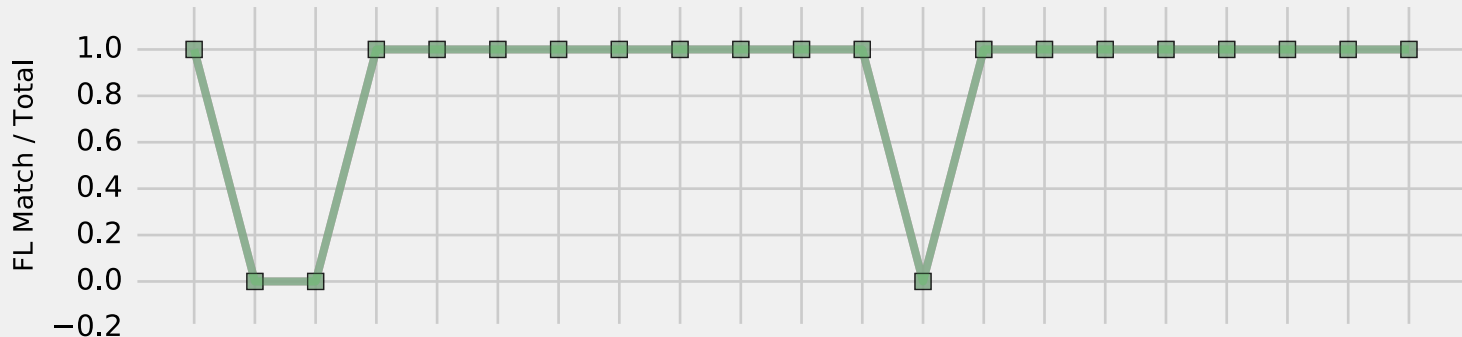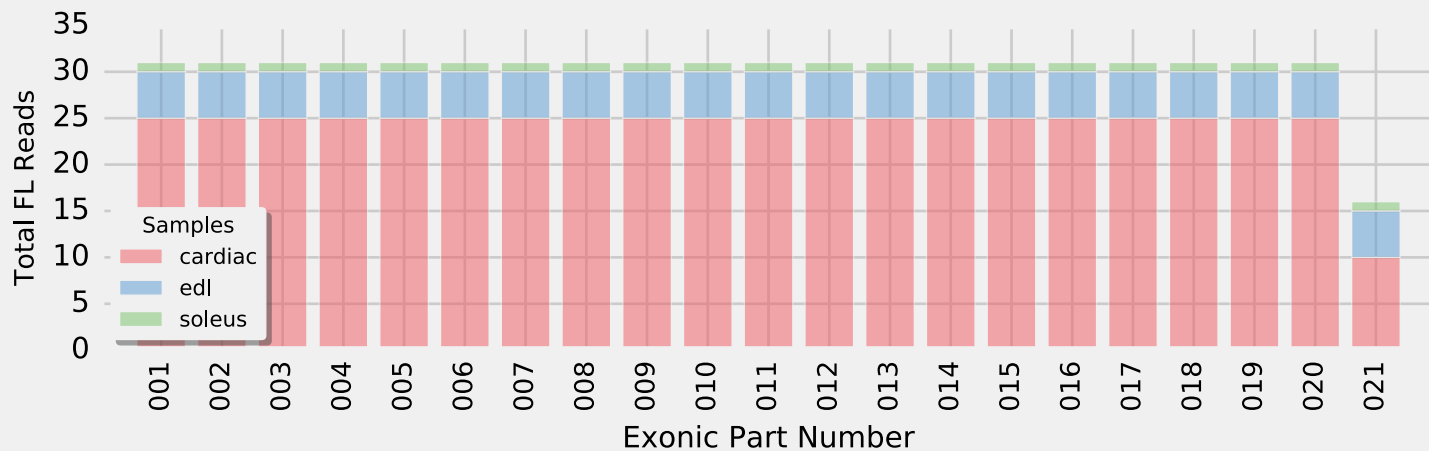



# Ap2b1

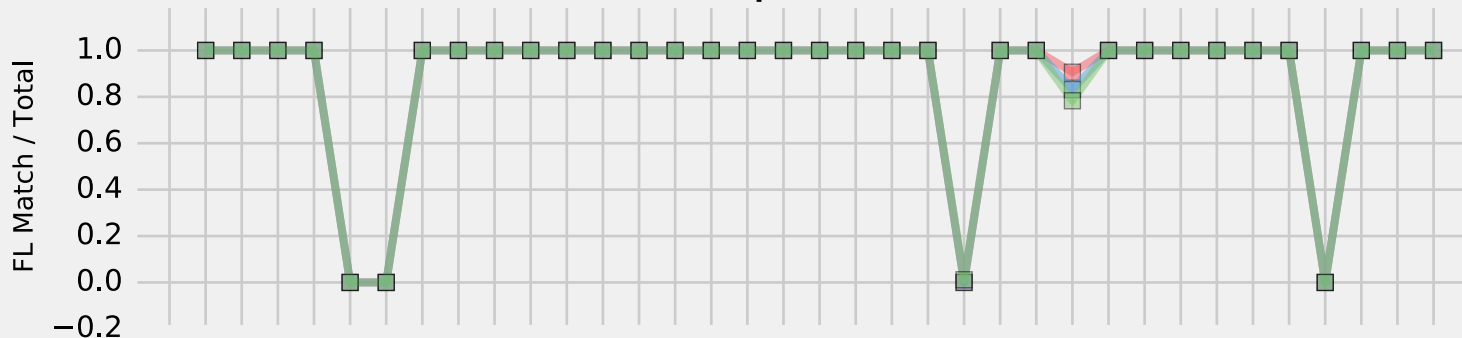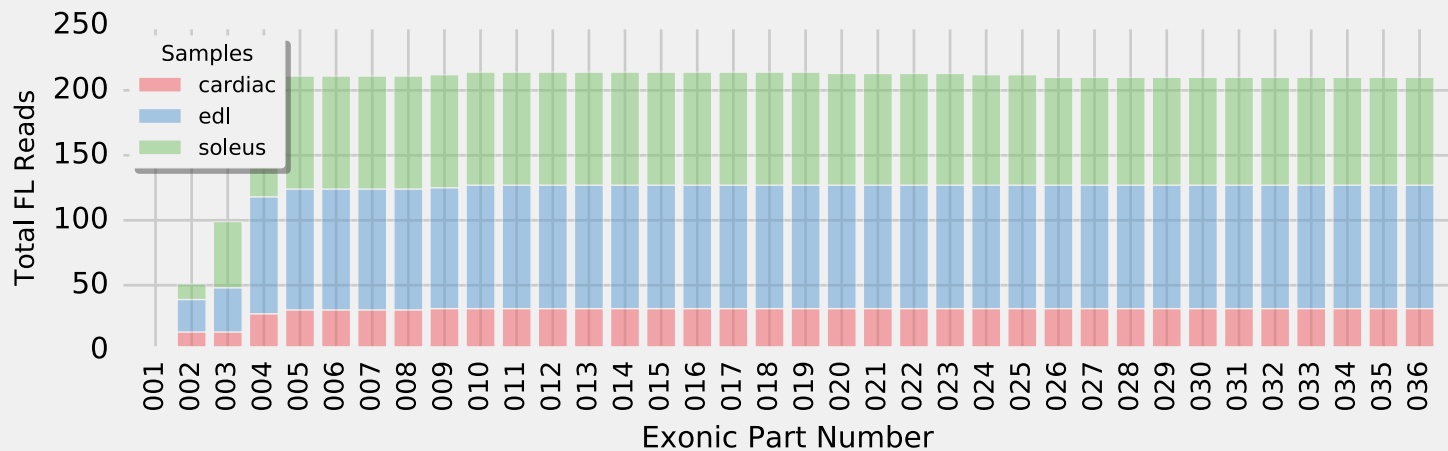

# Arel1

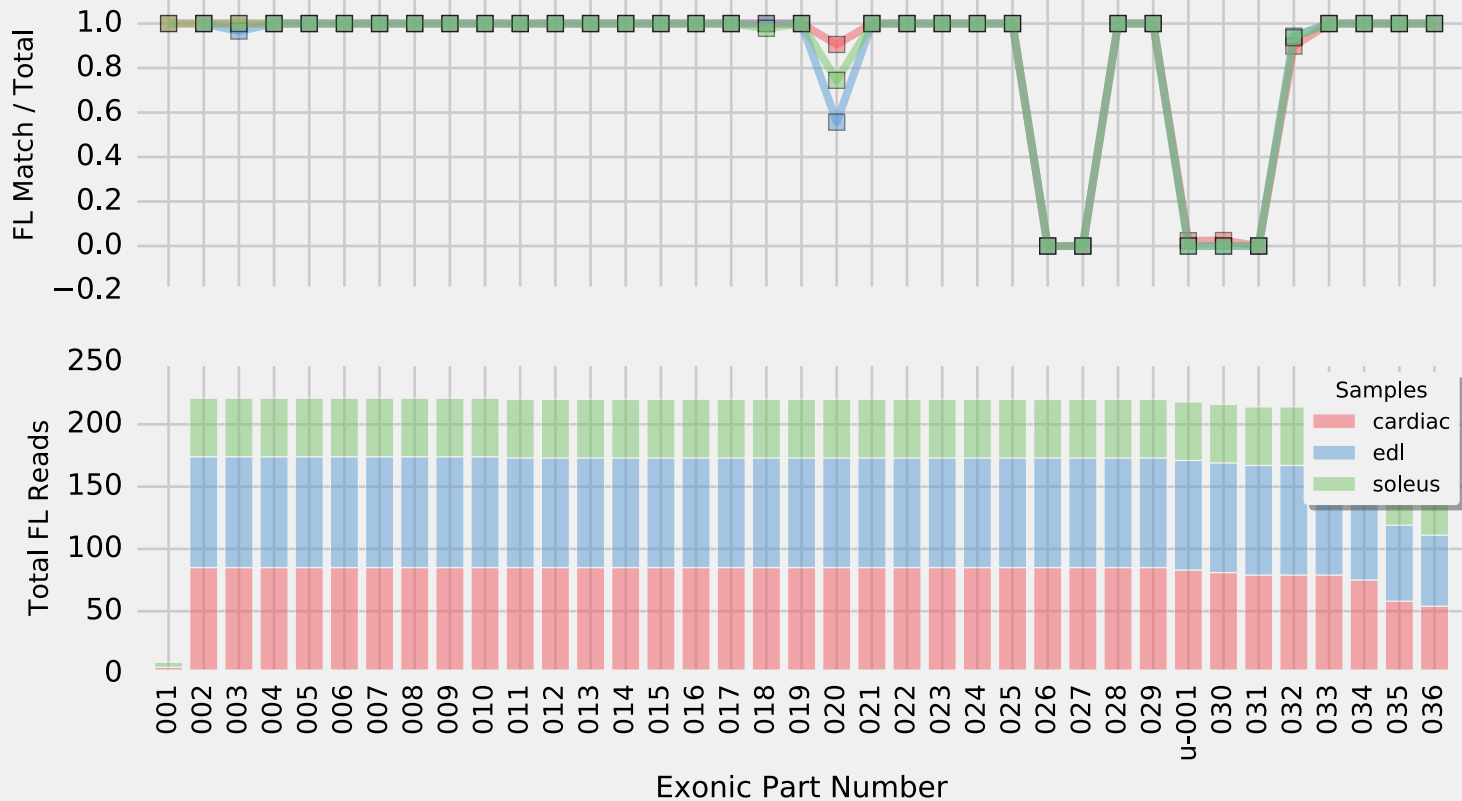

# Arfgef1

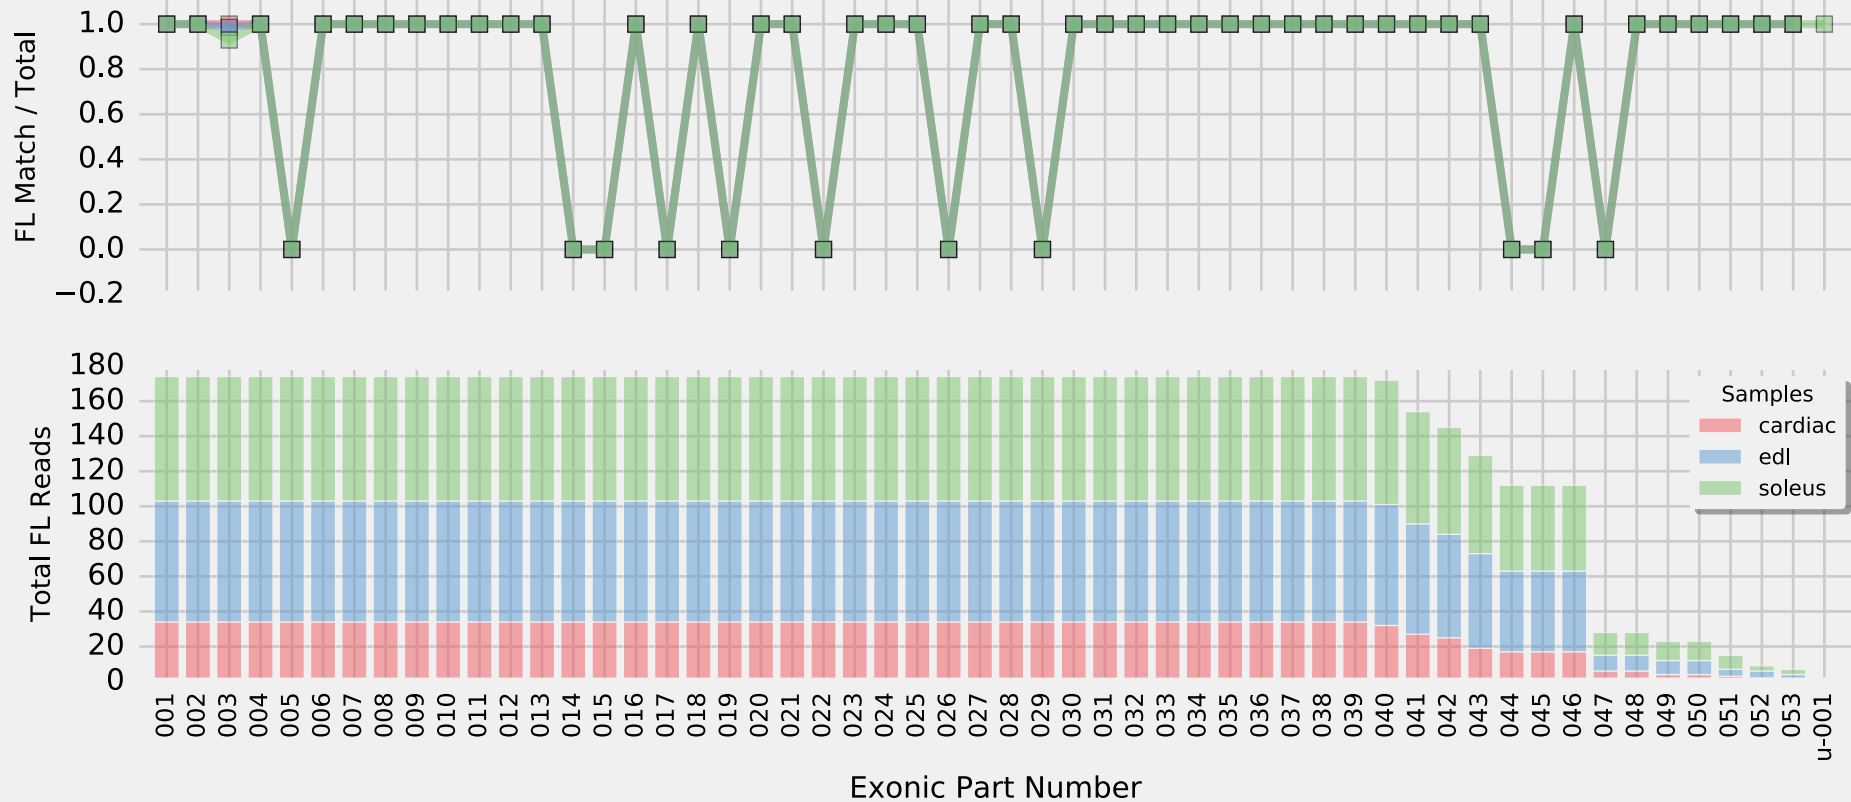

# Arfgef2

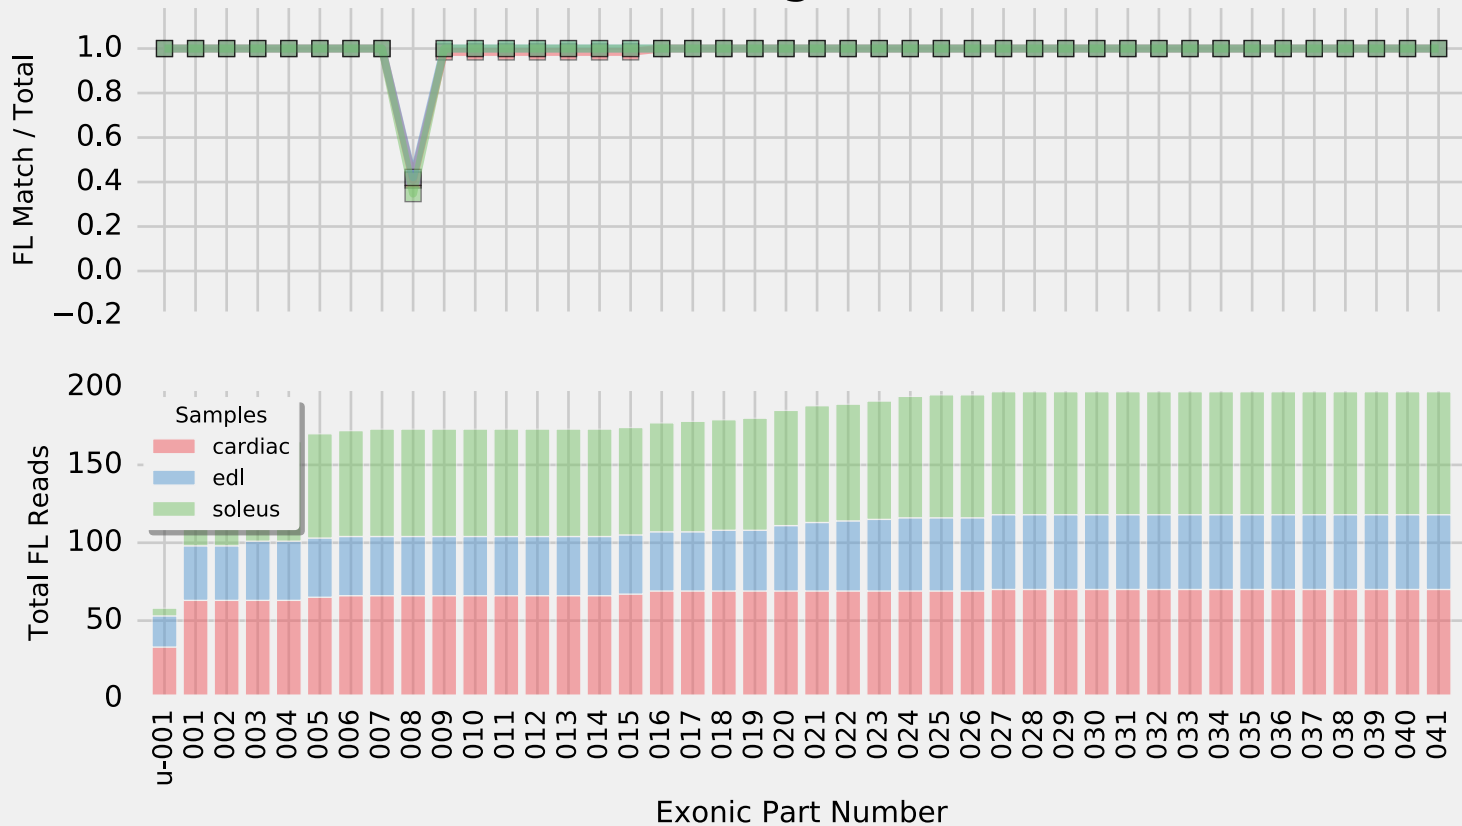

# Arhgap19

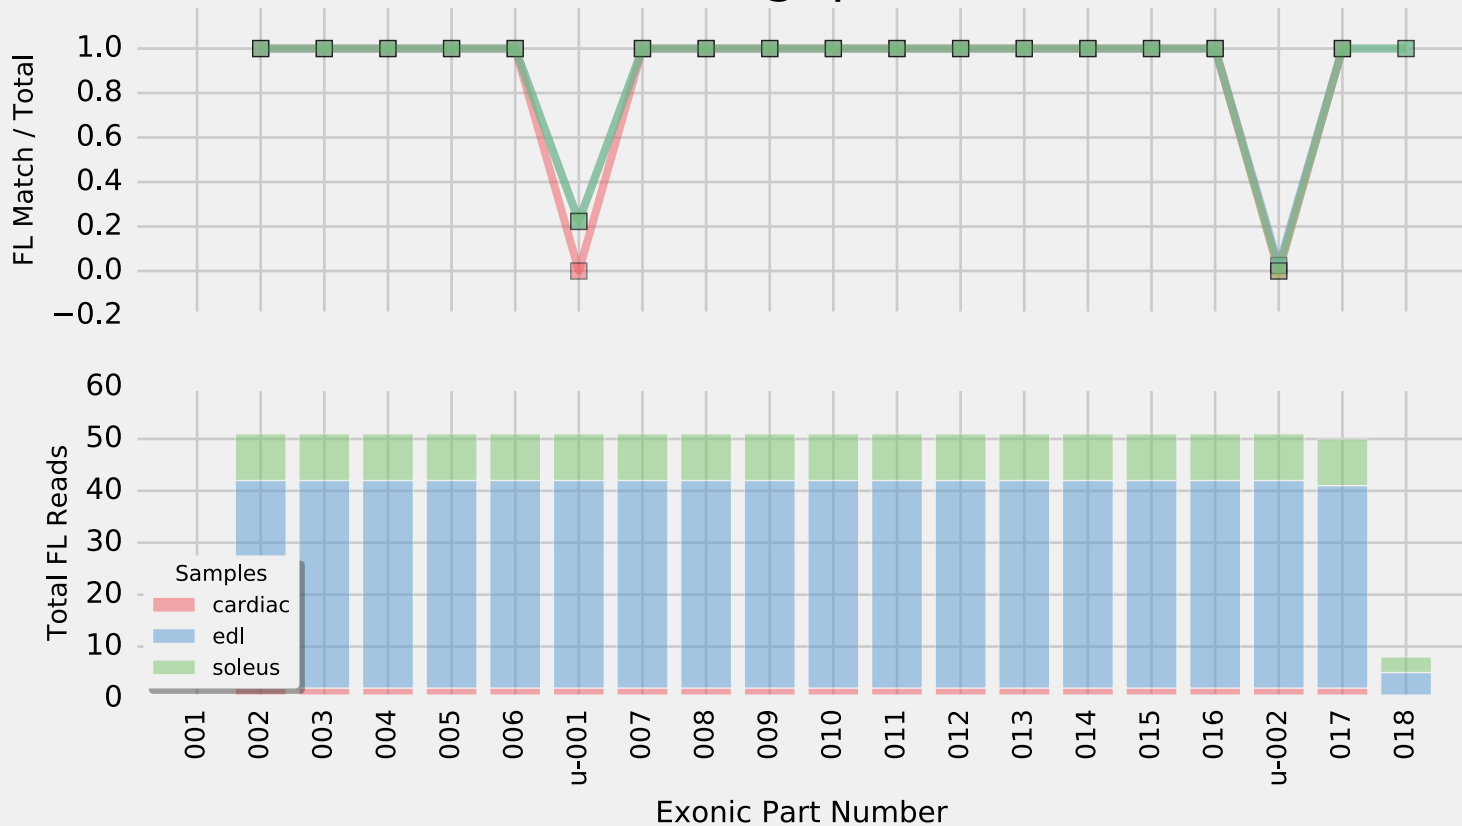

# Arhgap20

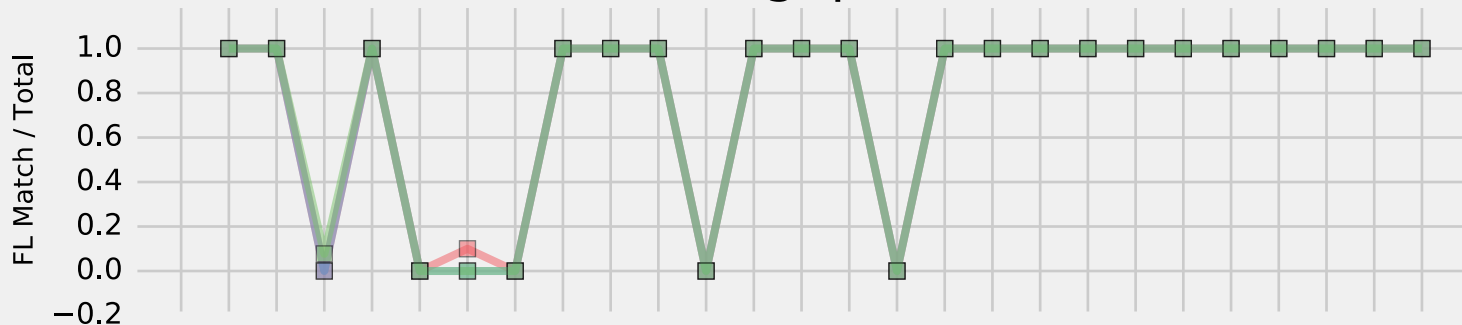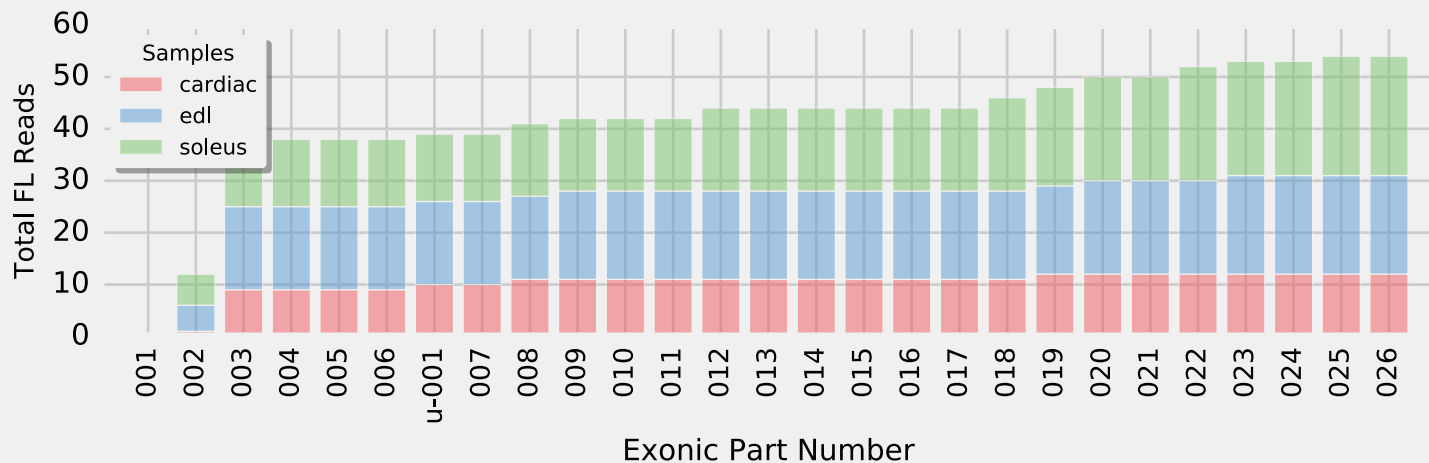

# Arhgap29

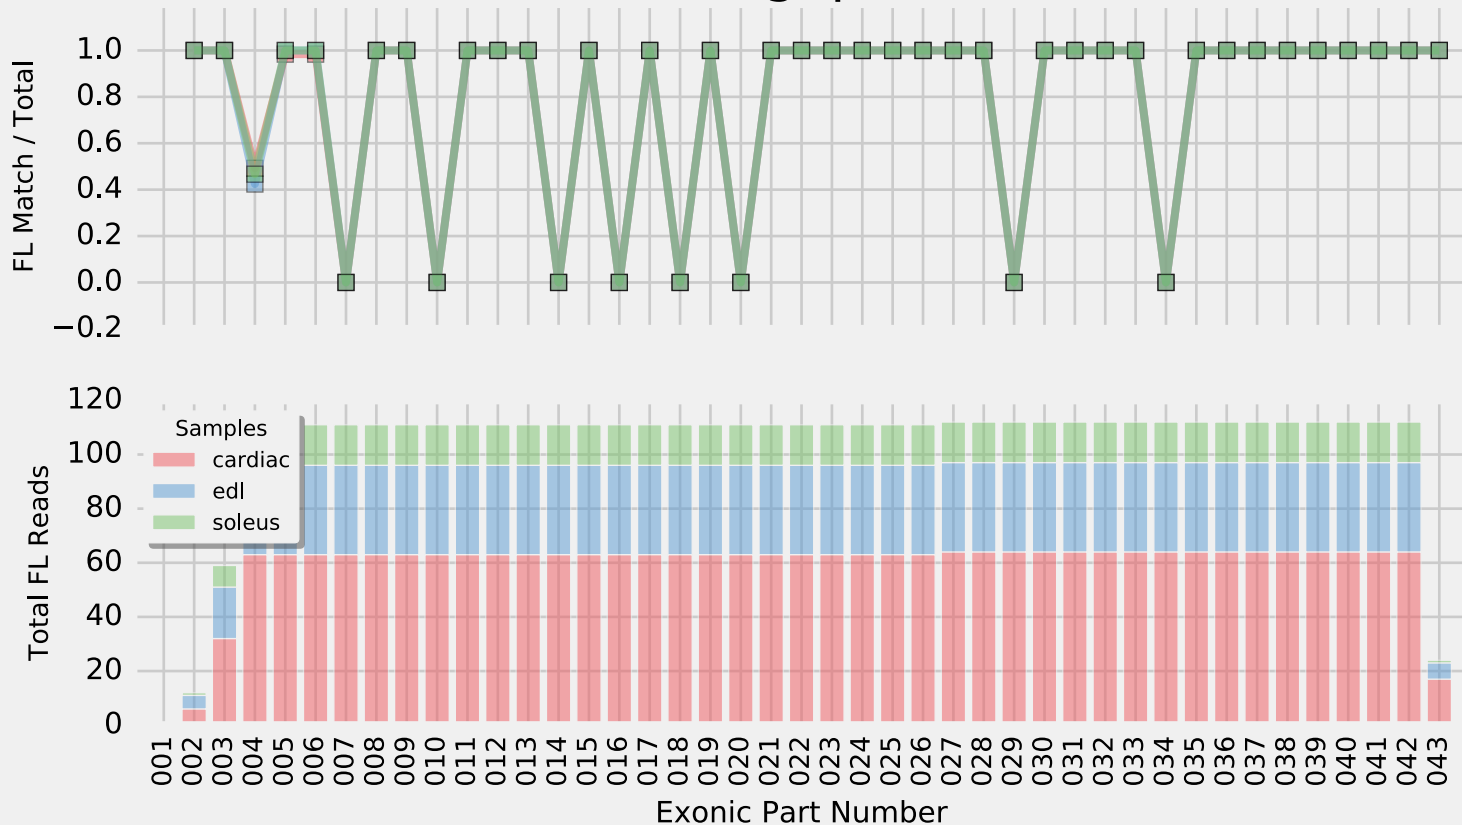

# Arhgap31

FL Match / Total

1.0  
0.8  
0.6  
0.4  
0.2  
0.0  
-0.2

Total FL Reads

25  
20  
15  
10  
5  
0

Samples

cardiac

edl

soleus

001

002

003

004

005

006

007

008

009

010

011

012

013

014

015

016

Exonic Part Number

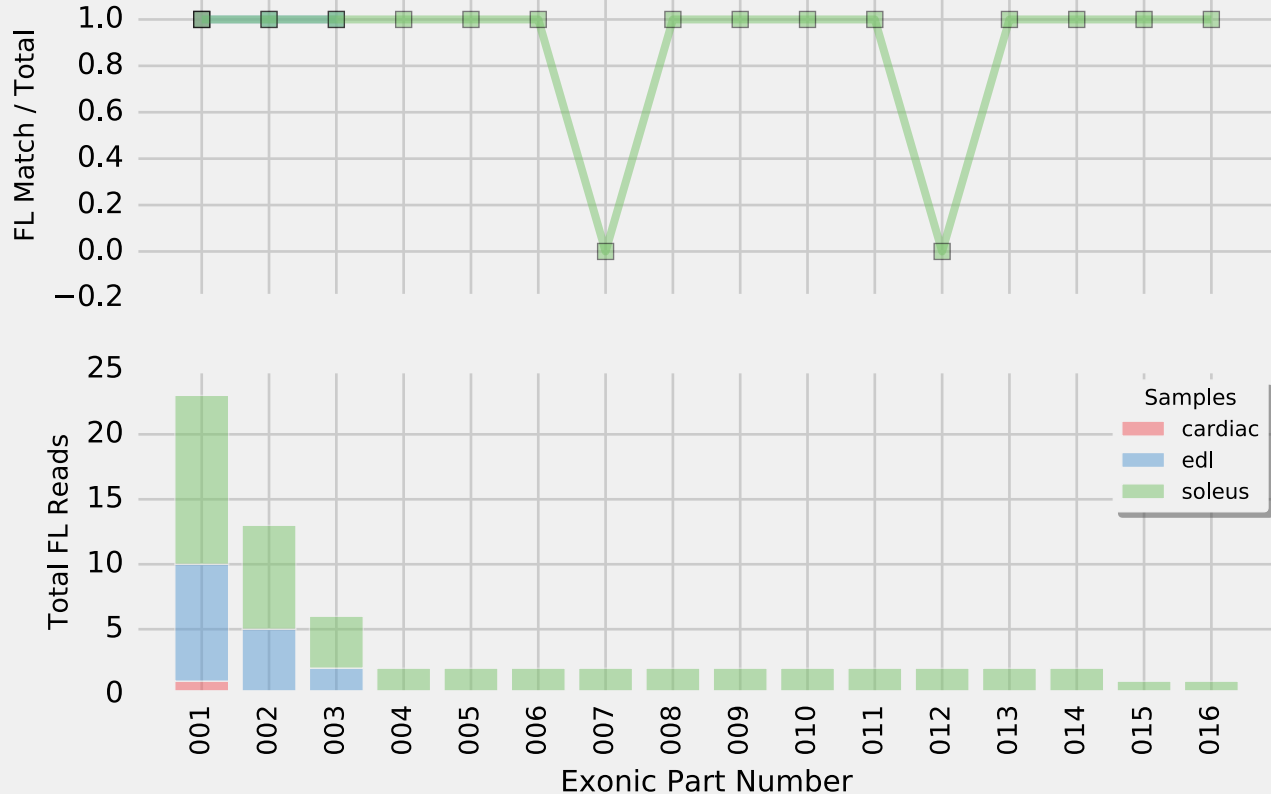



# Arhgap5

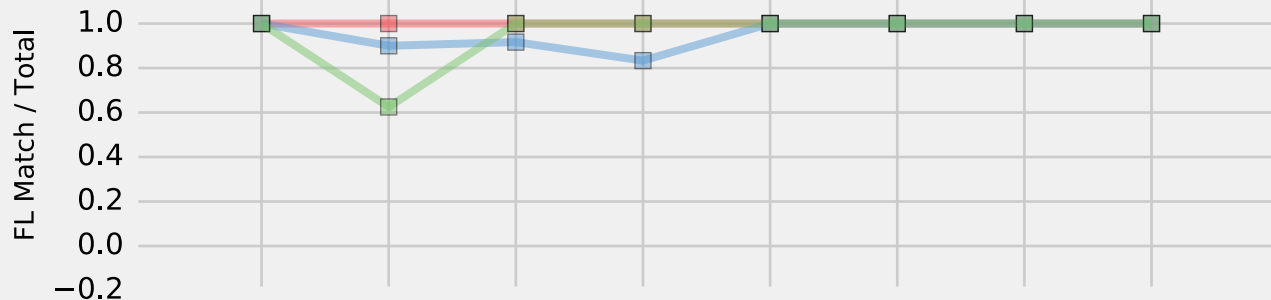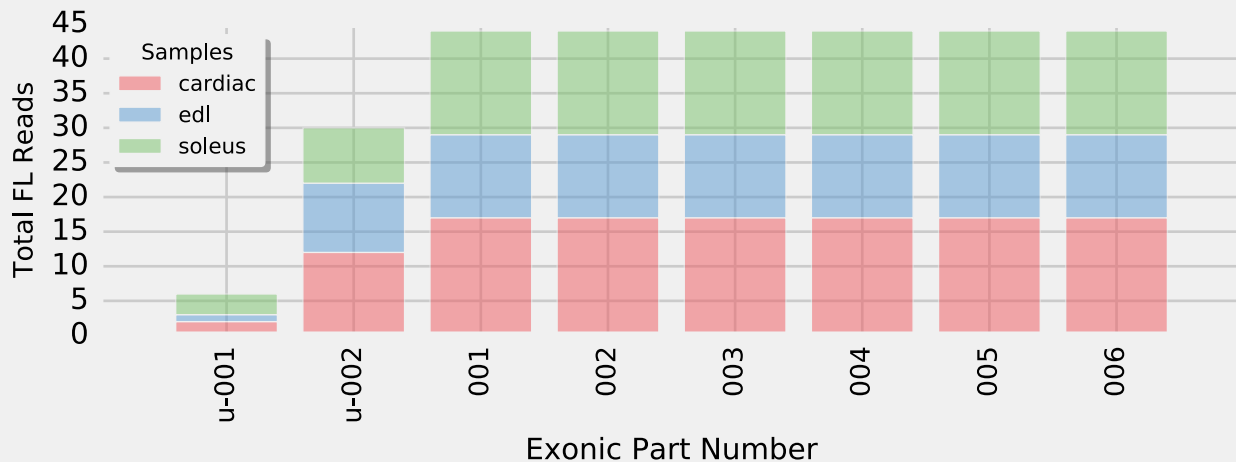

# Arhgef10

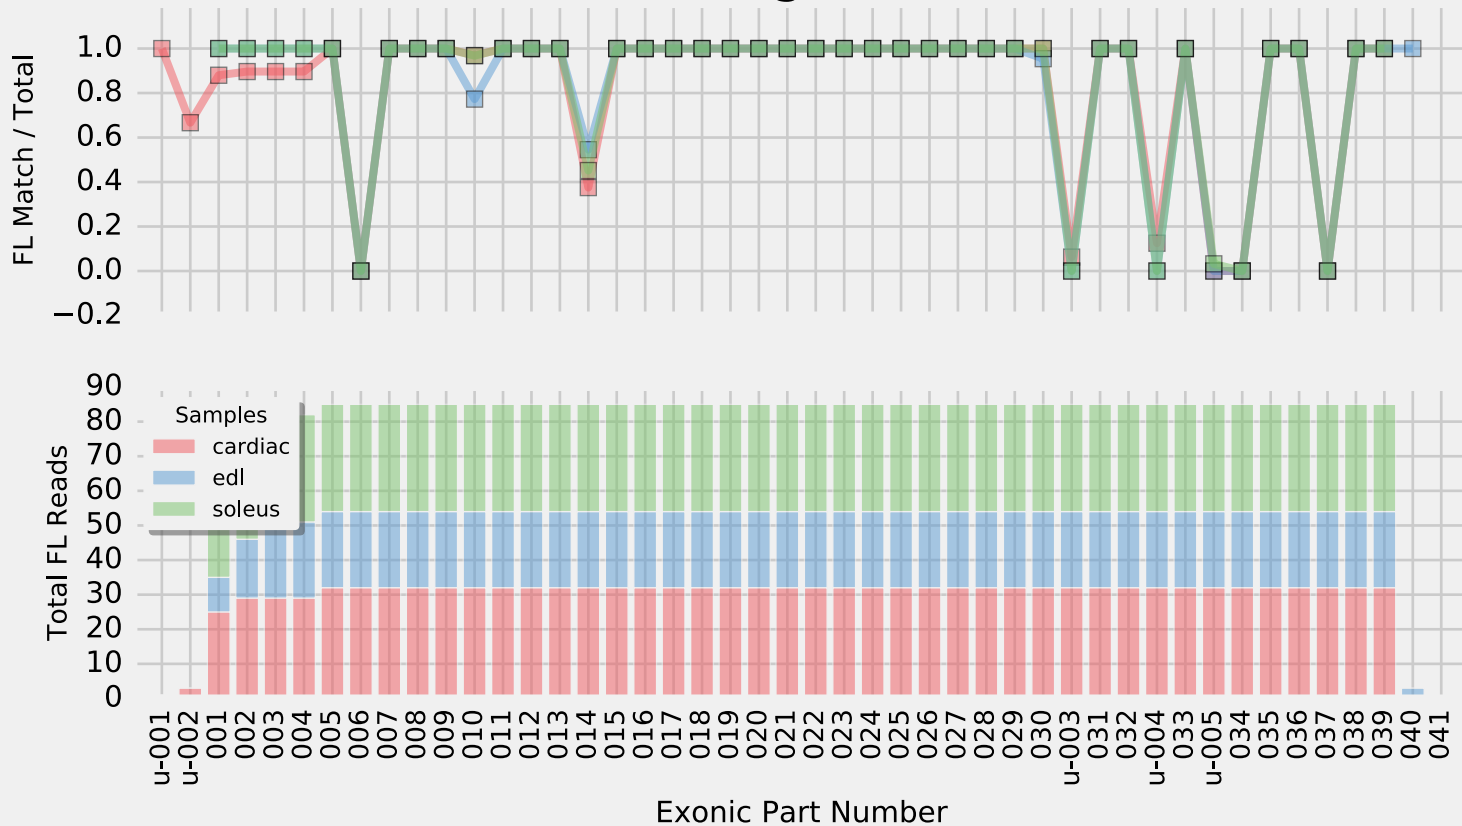

# Arhgef12

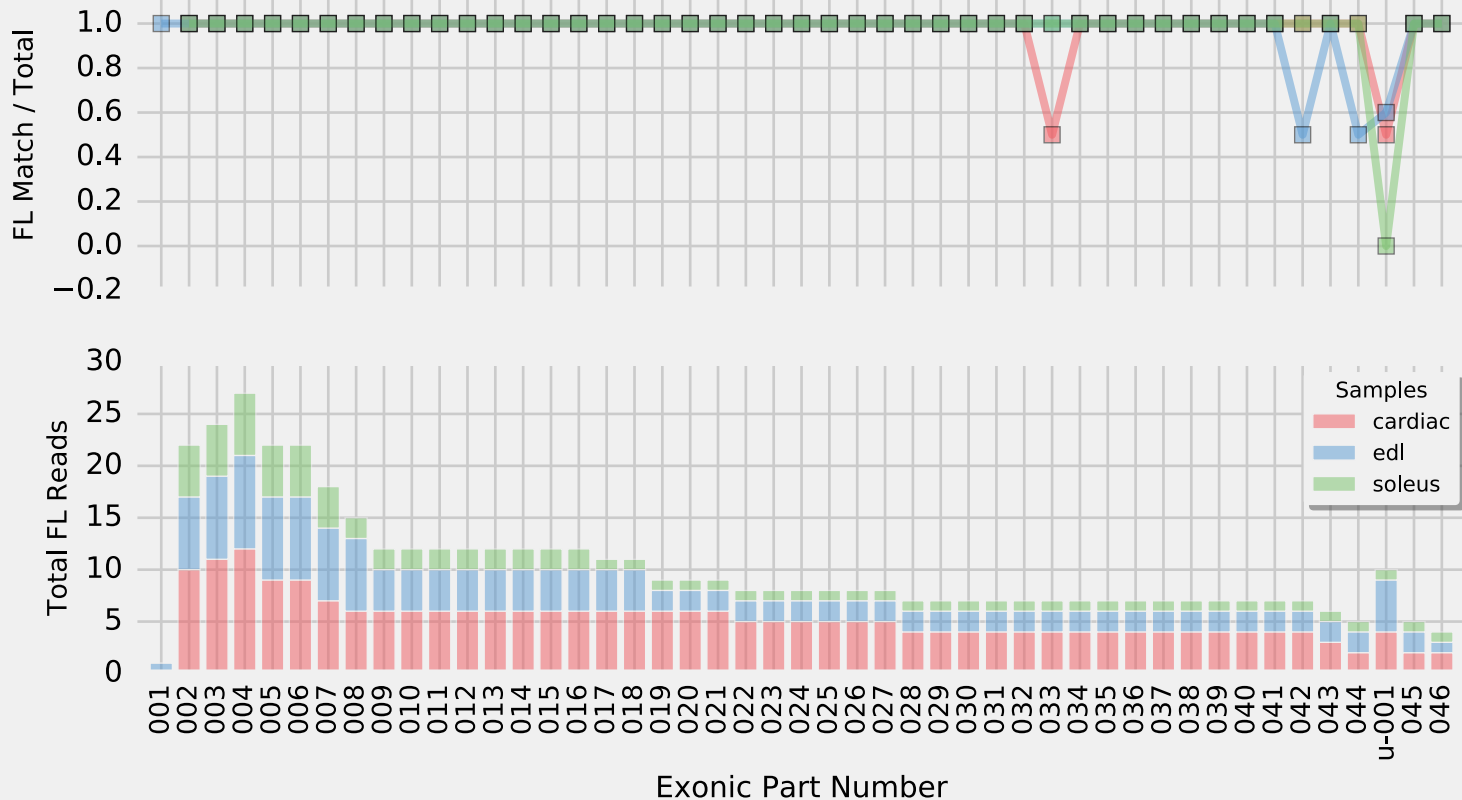

# Arhgef18

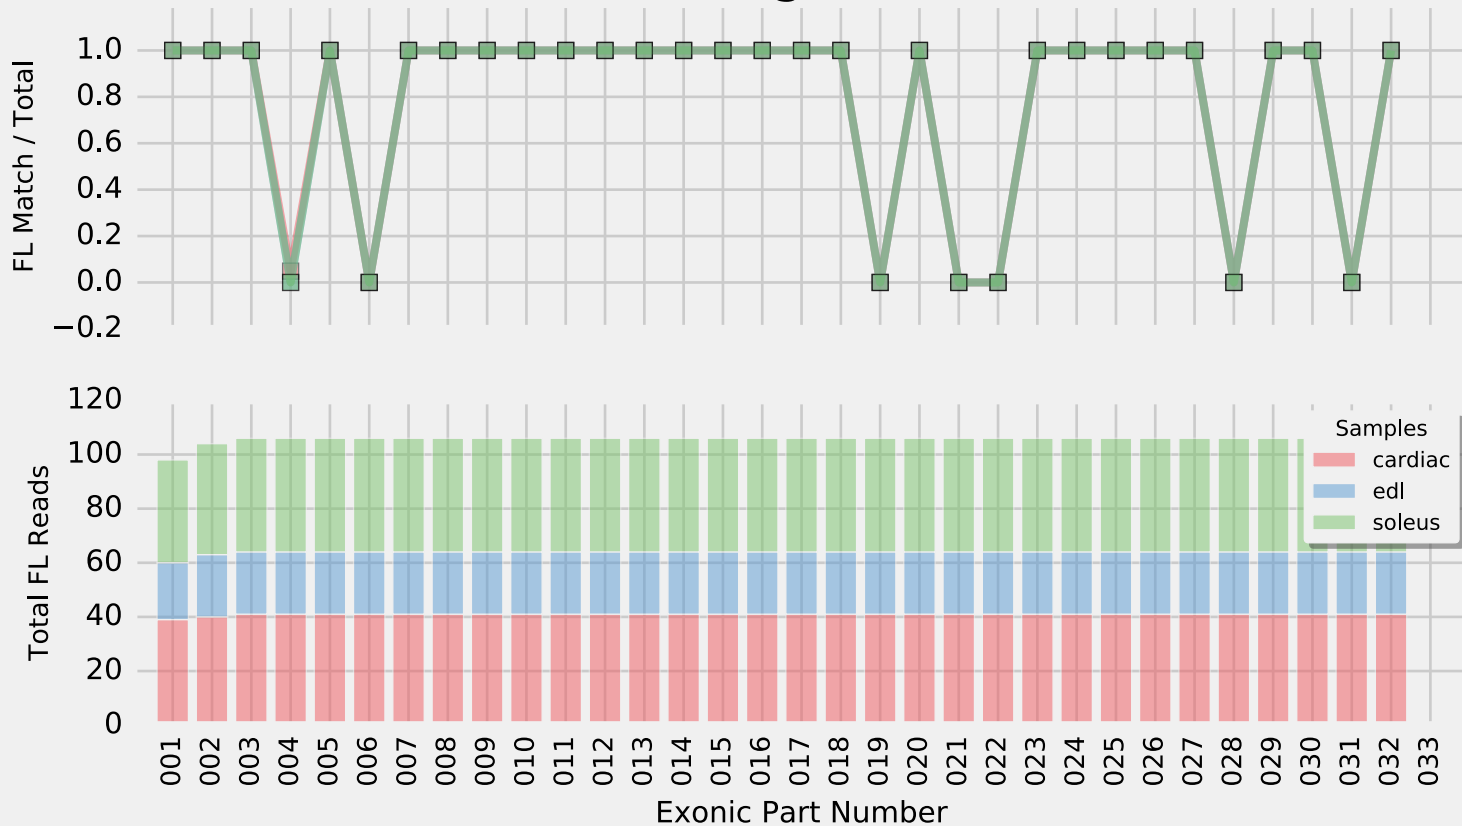

# Arid1b

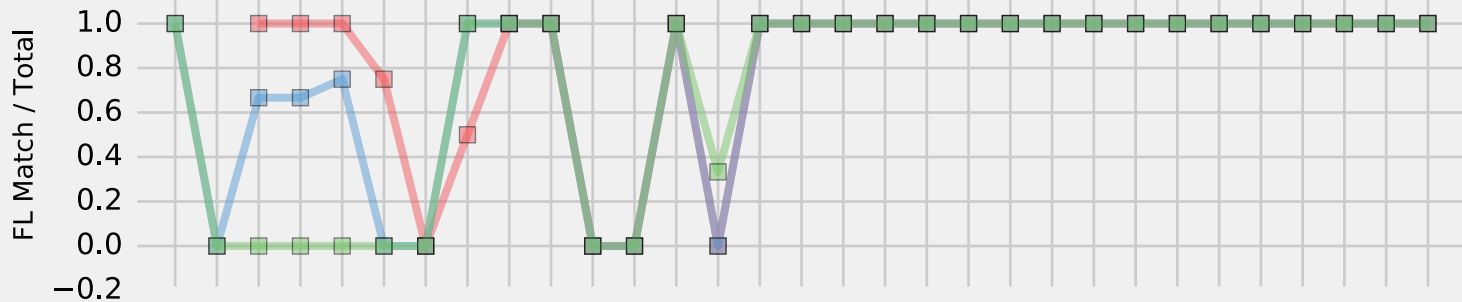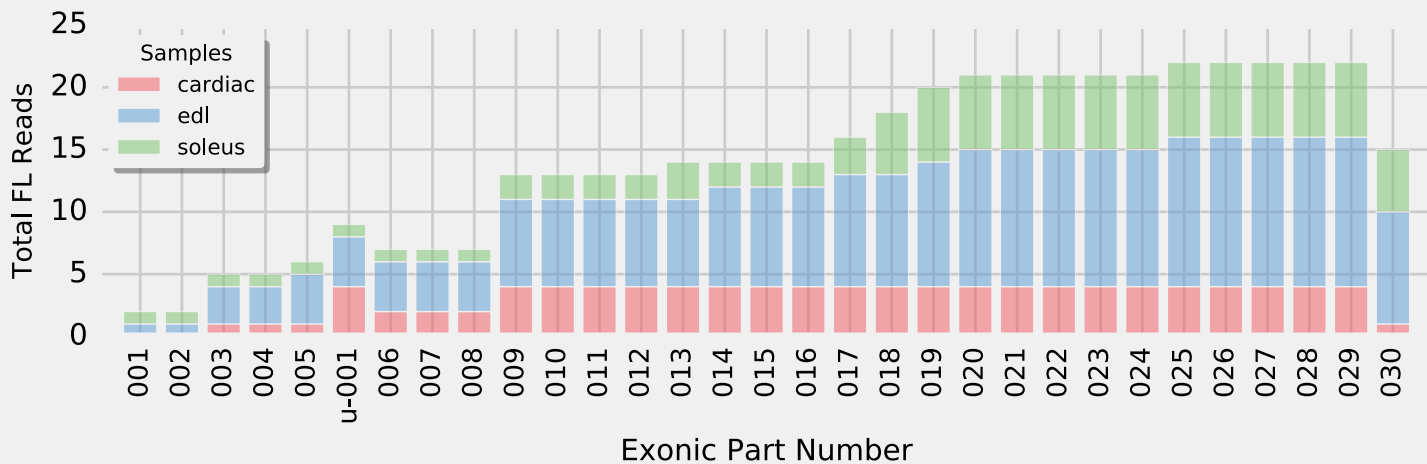

# Asb1

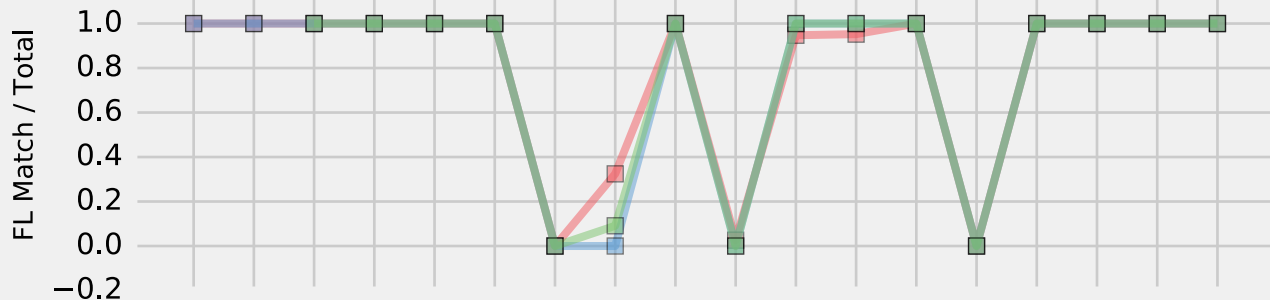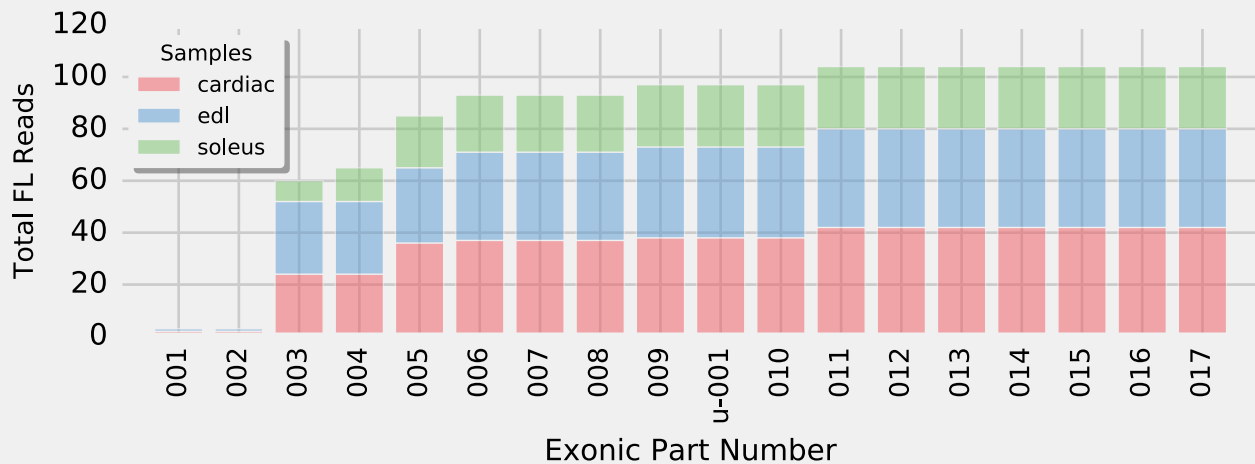

# Asph

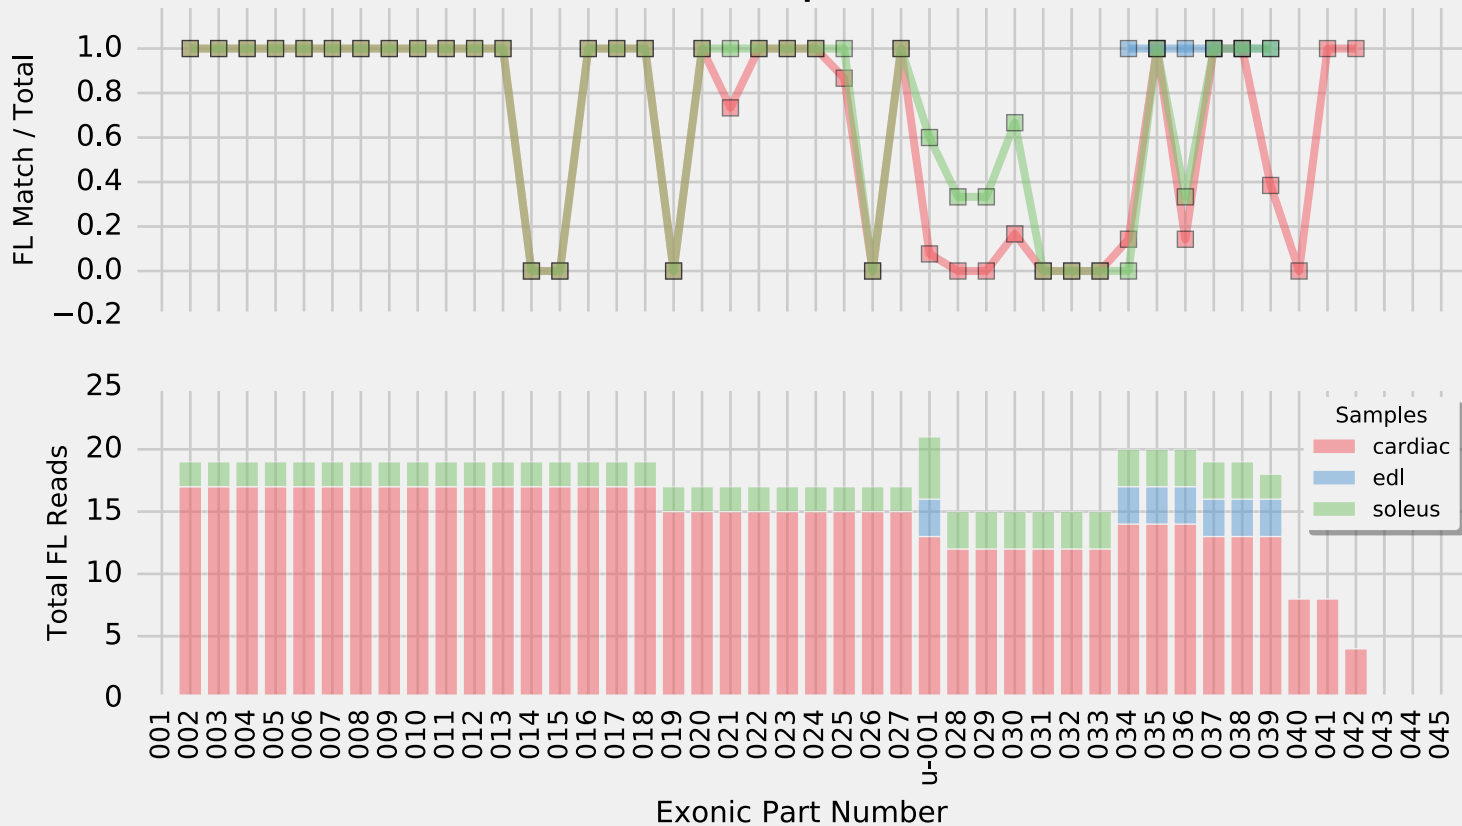

# Atf6

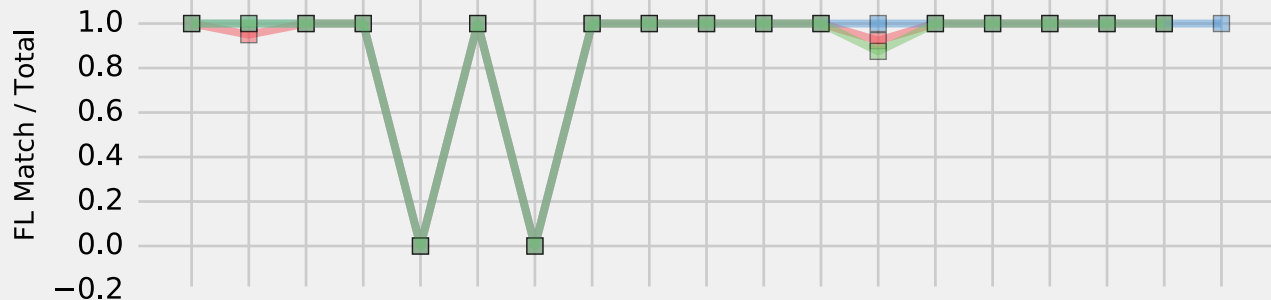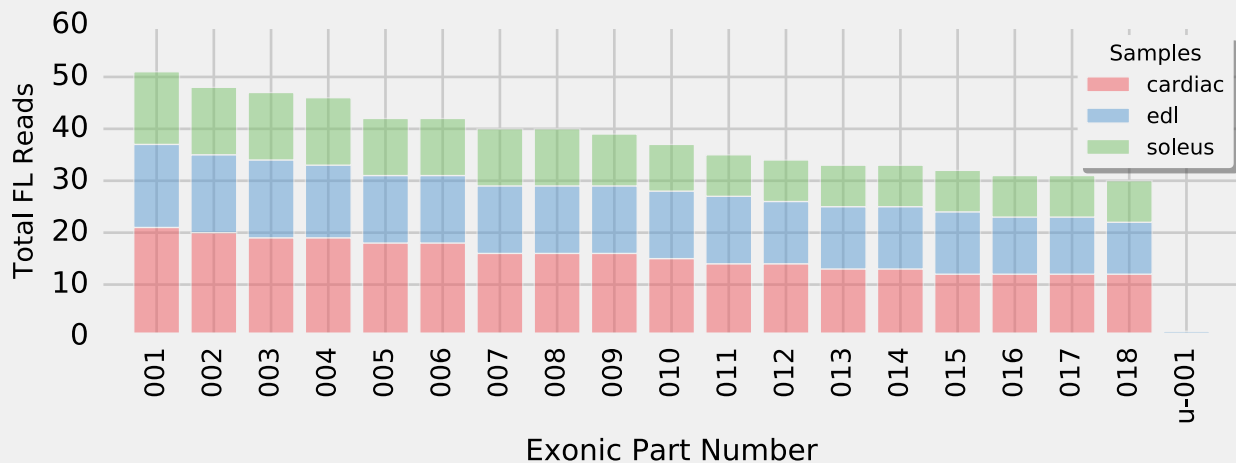



# Atg2b

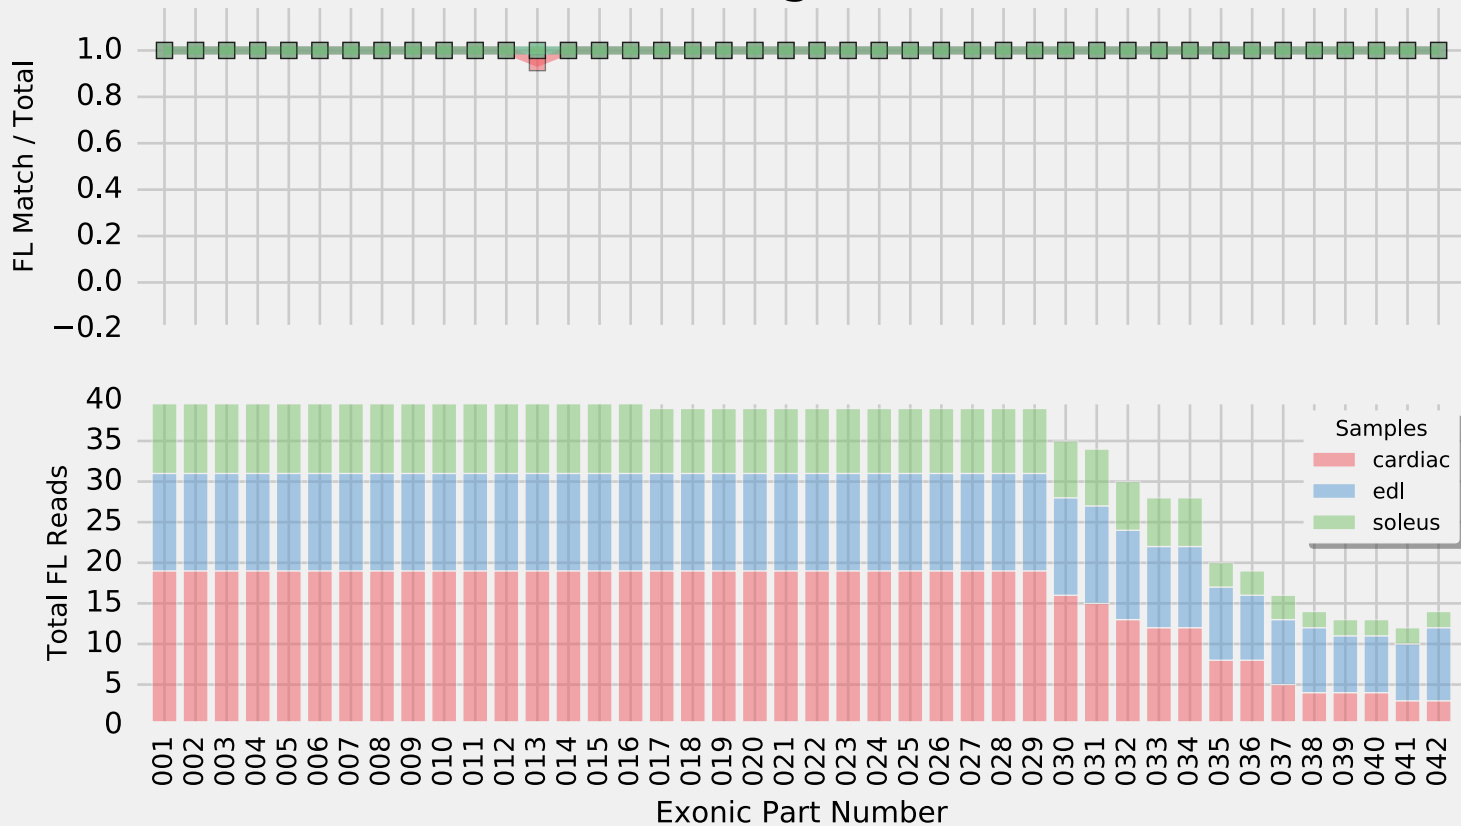

# Atp11a

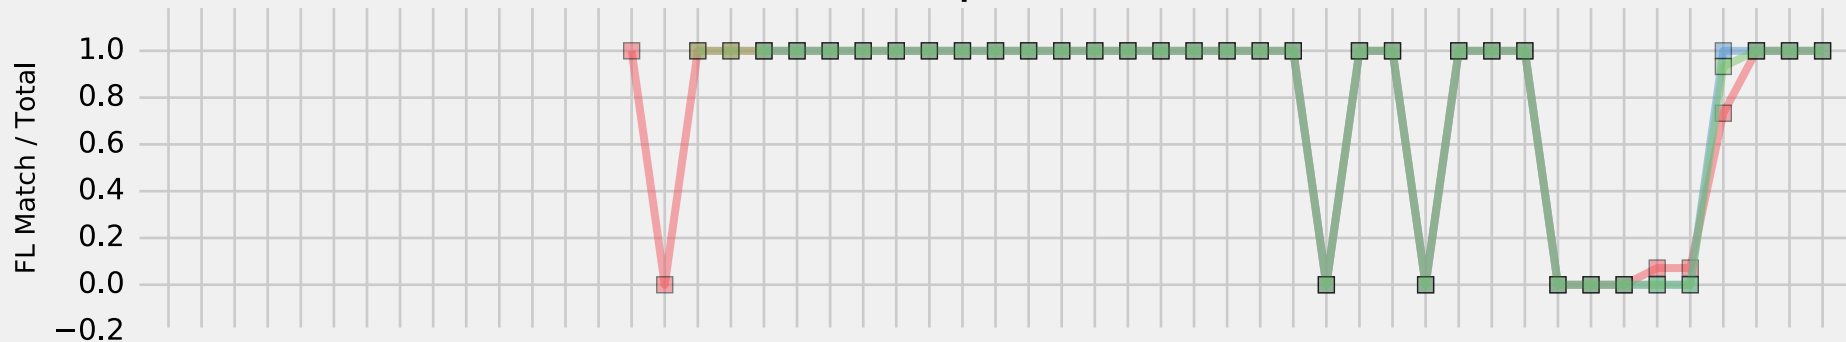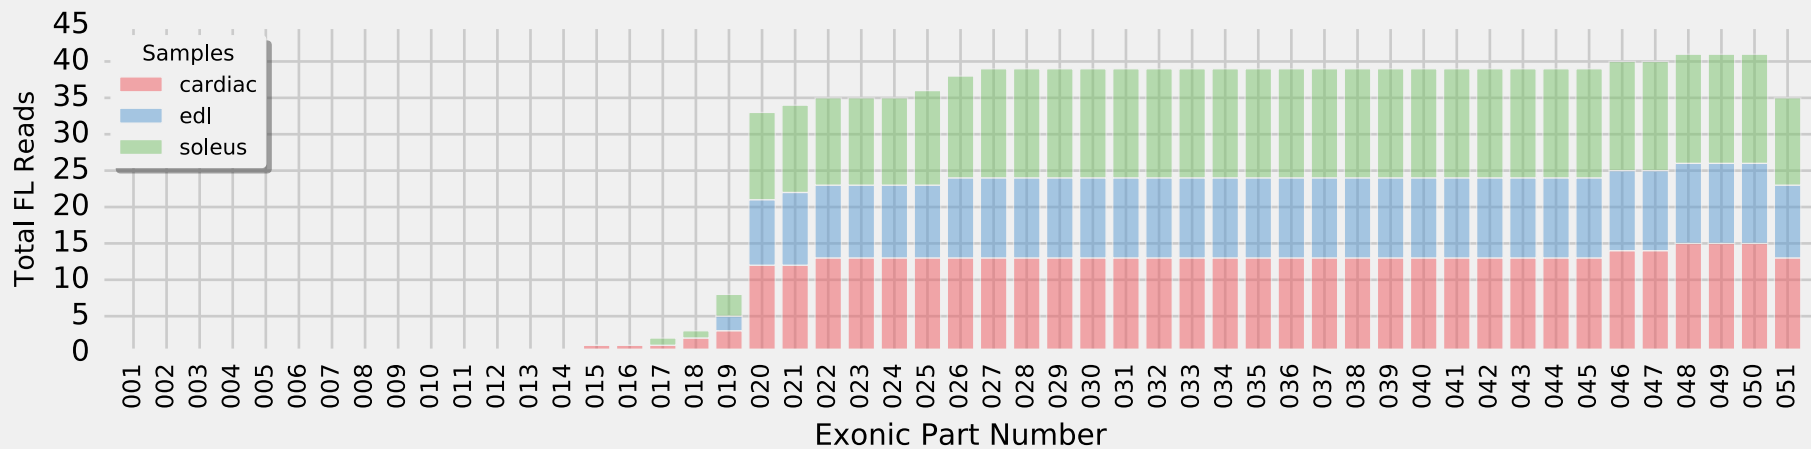

# Atp1a2

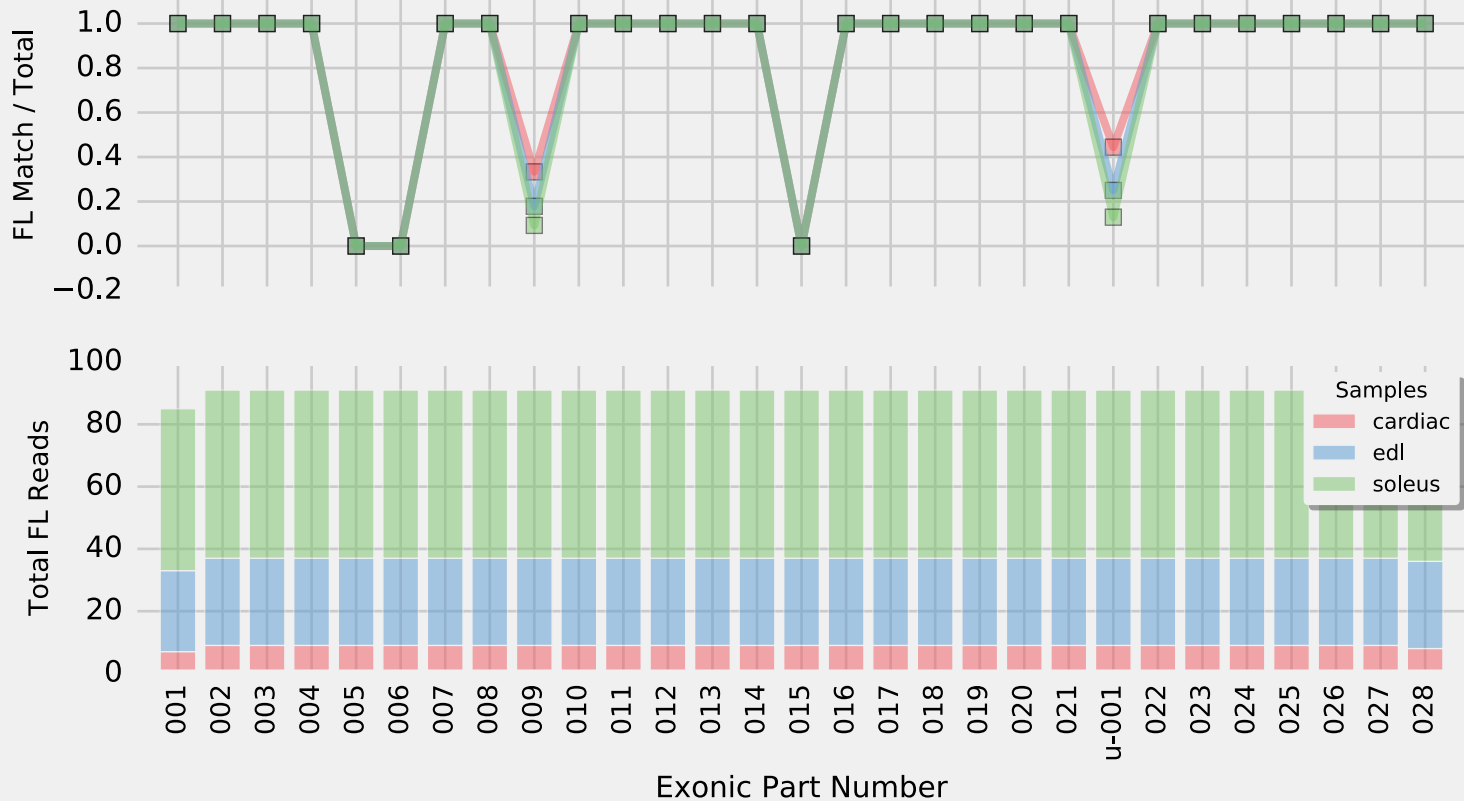

# Atp2a2

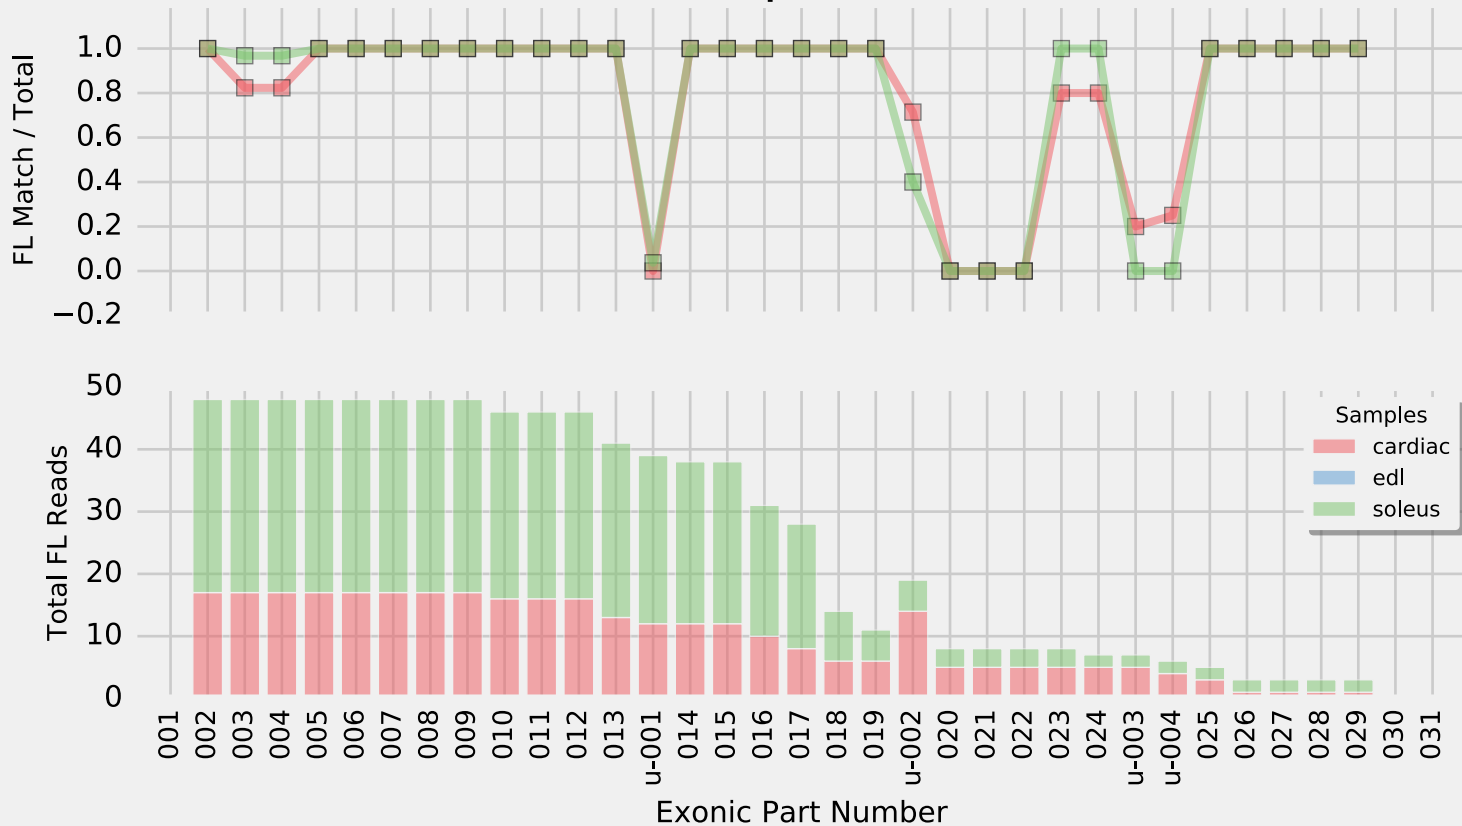

# Atp2b1

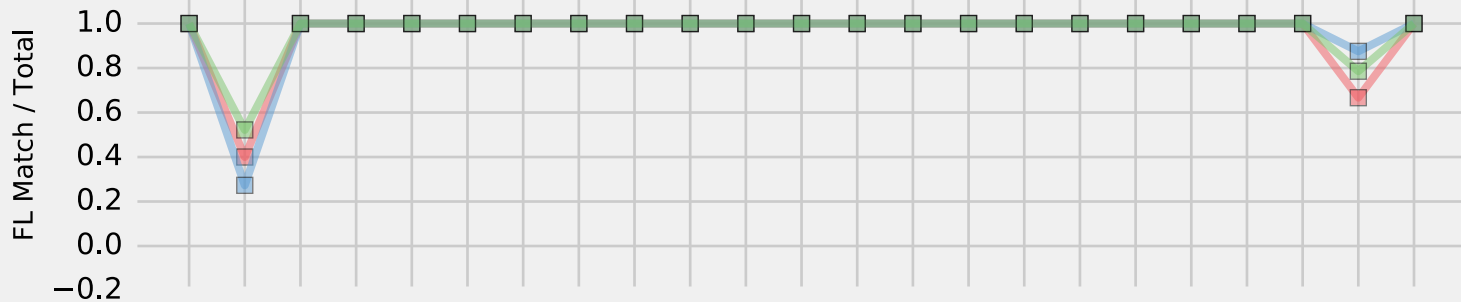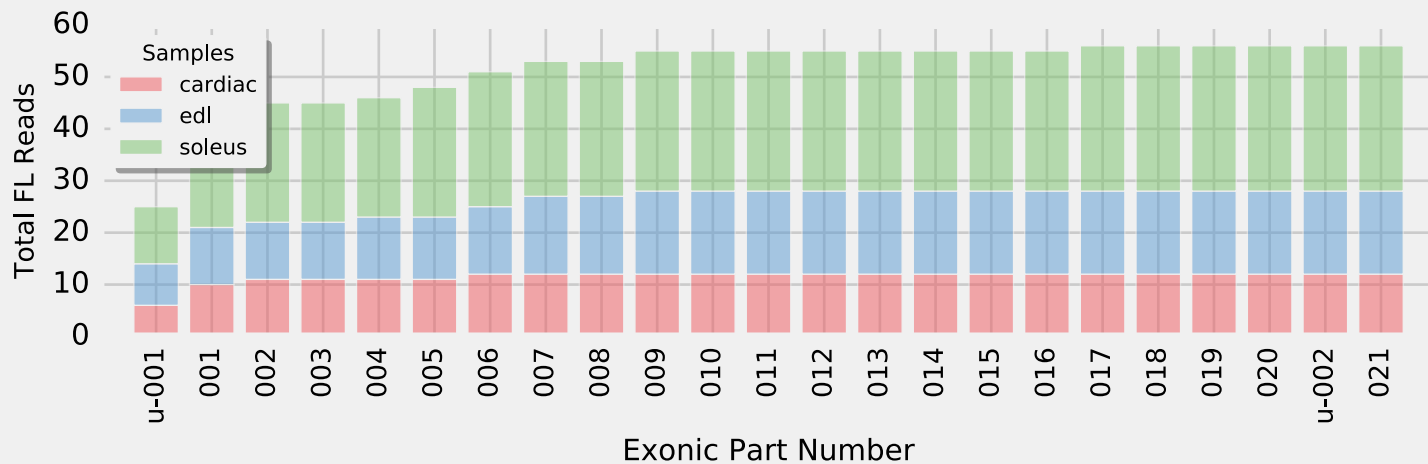

# Atp6v0a2

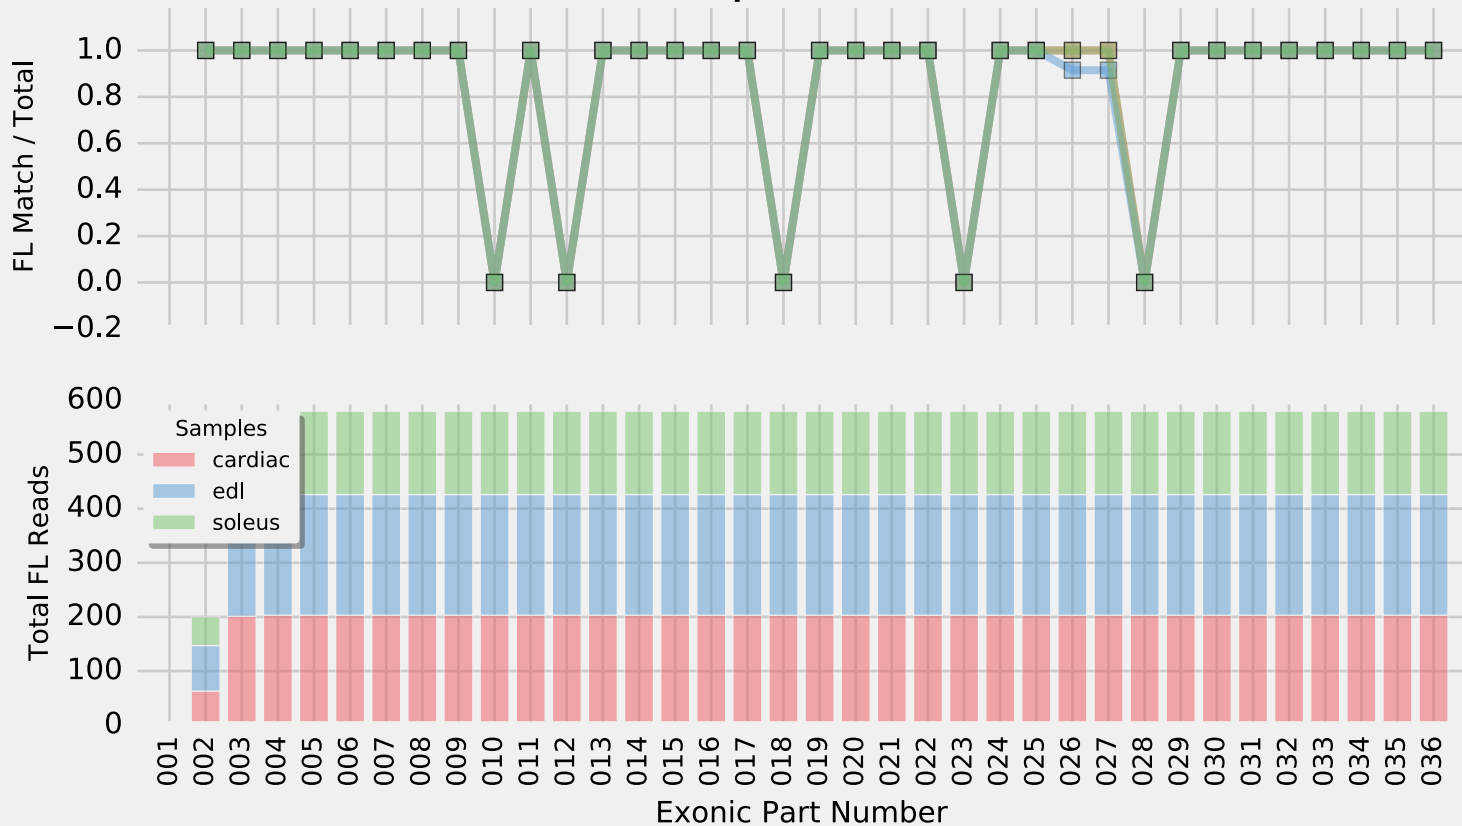

# Atp8a1

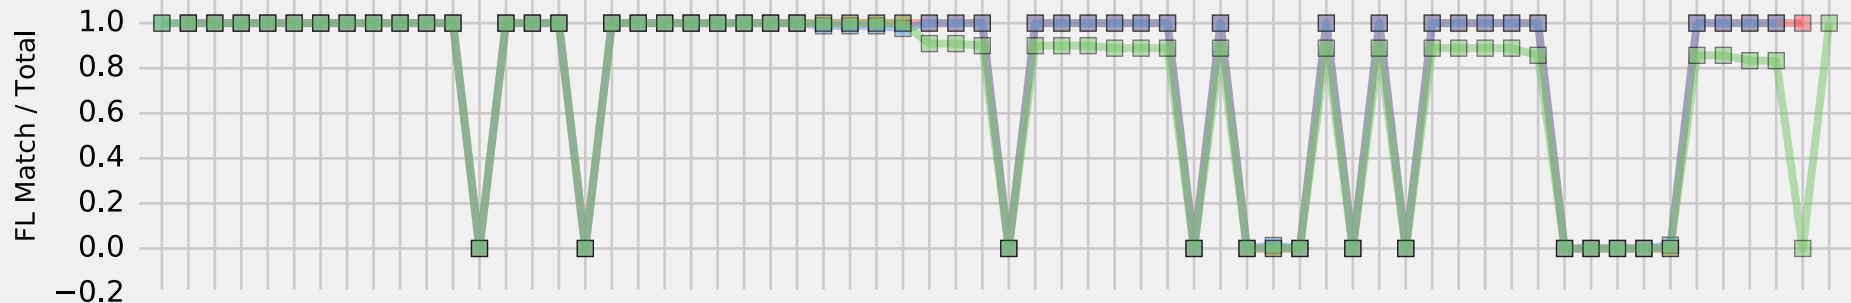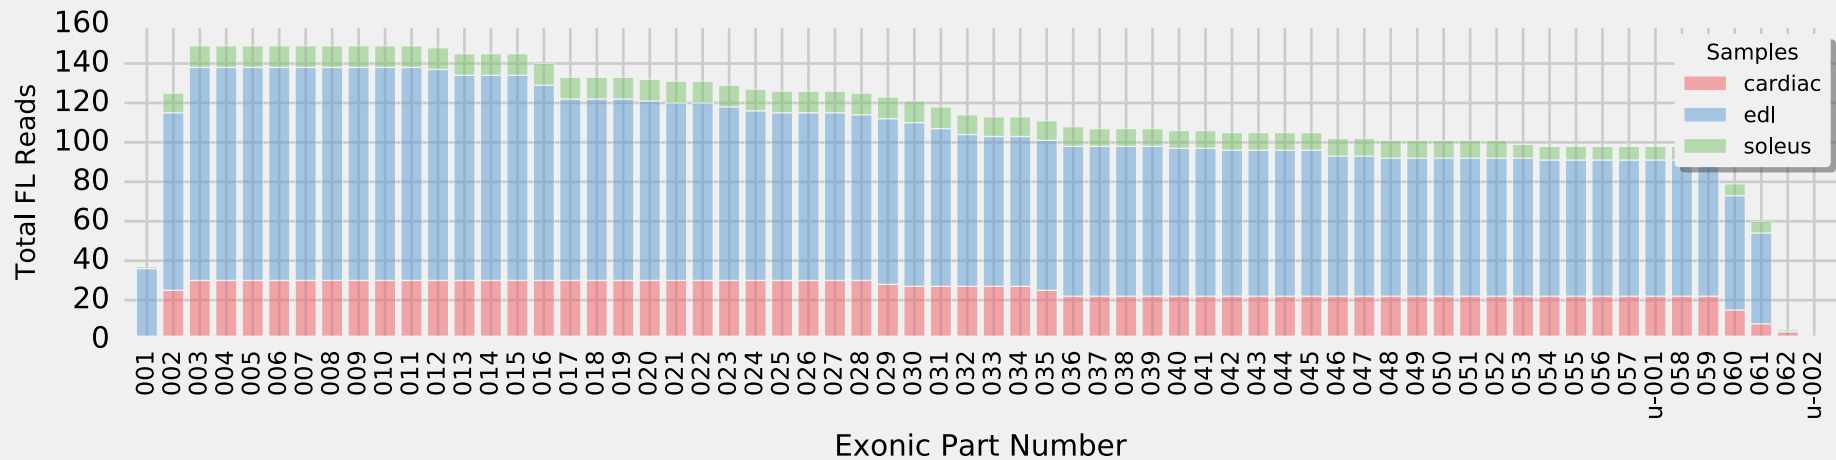

# B230354K17Rik

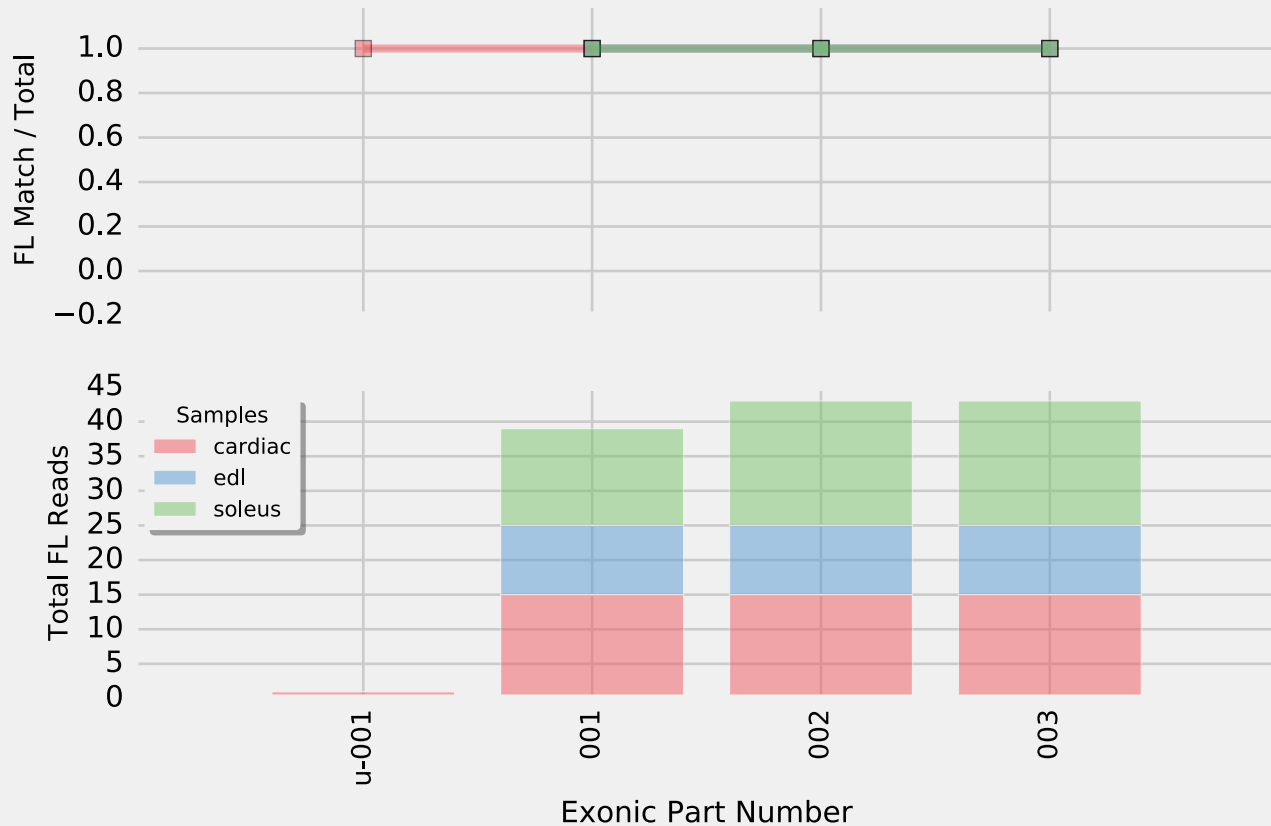



# Baz1b

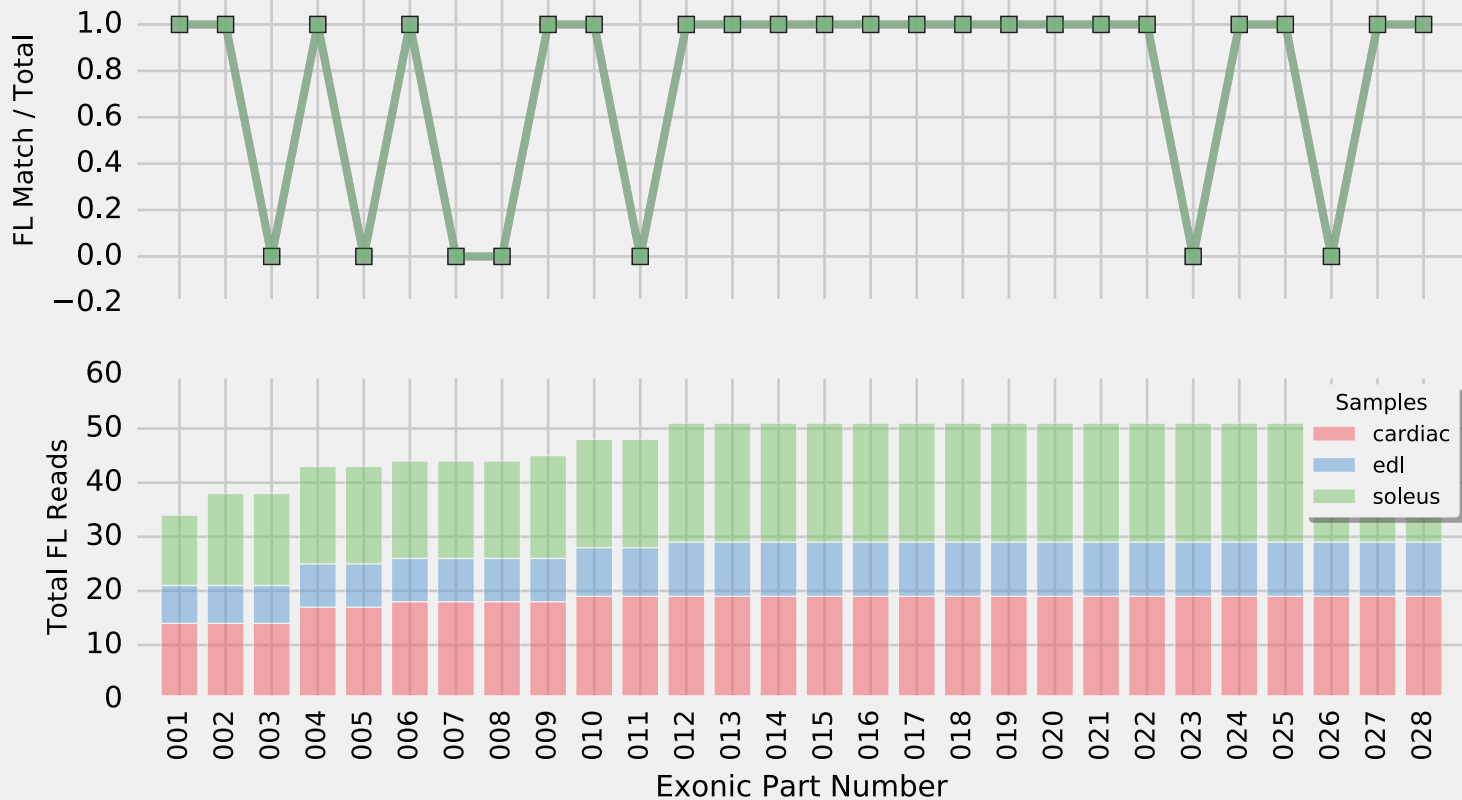

# Bche

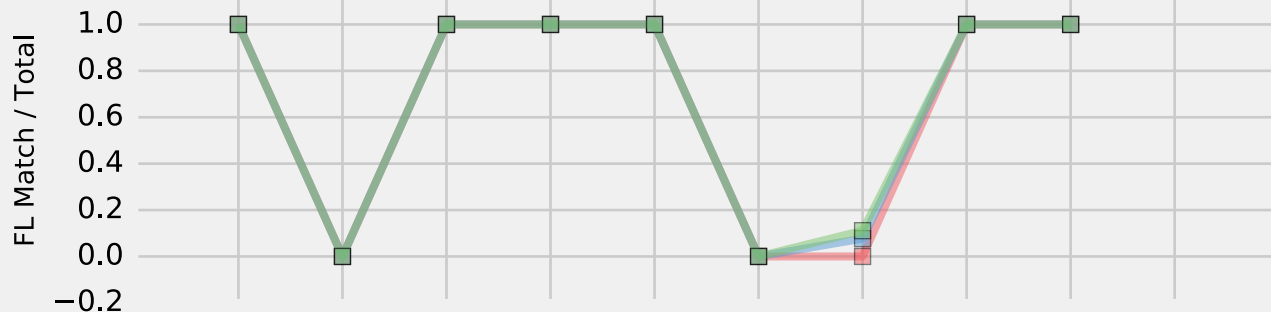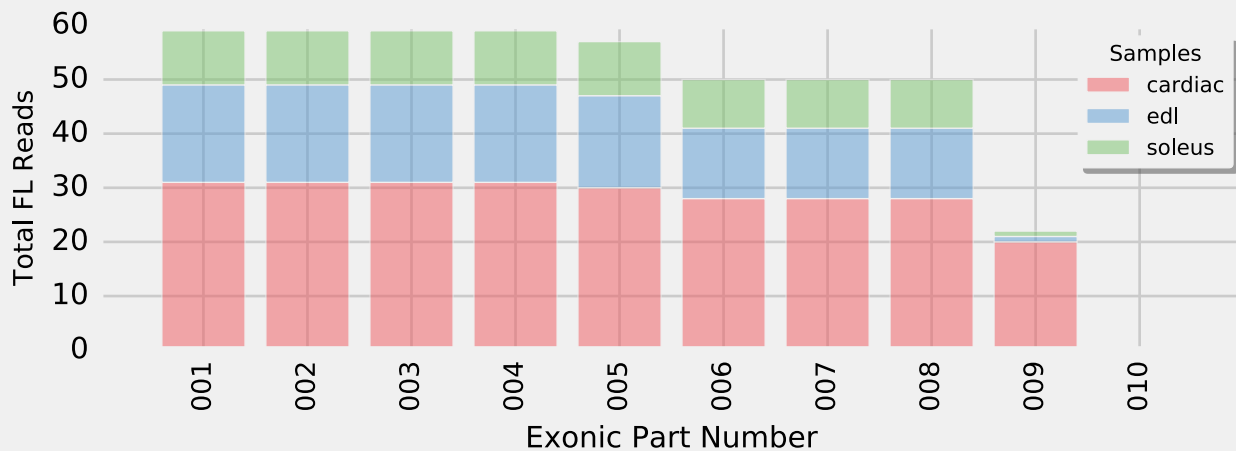

# Bcl2l1

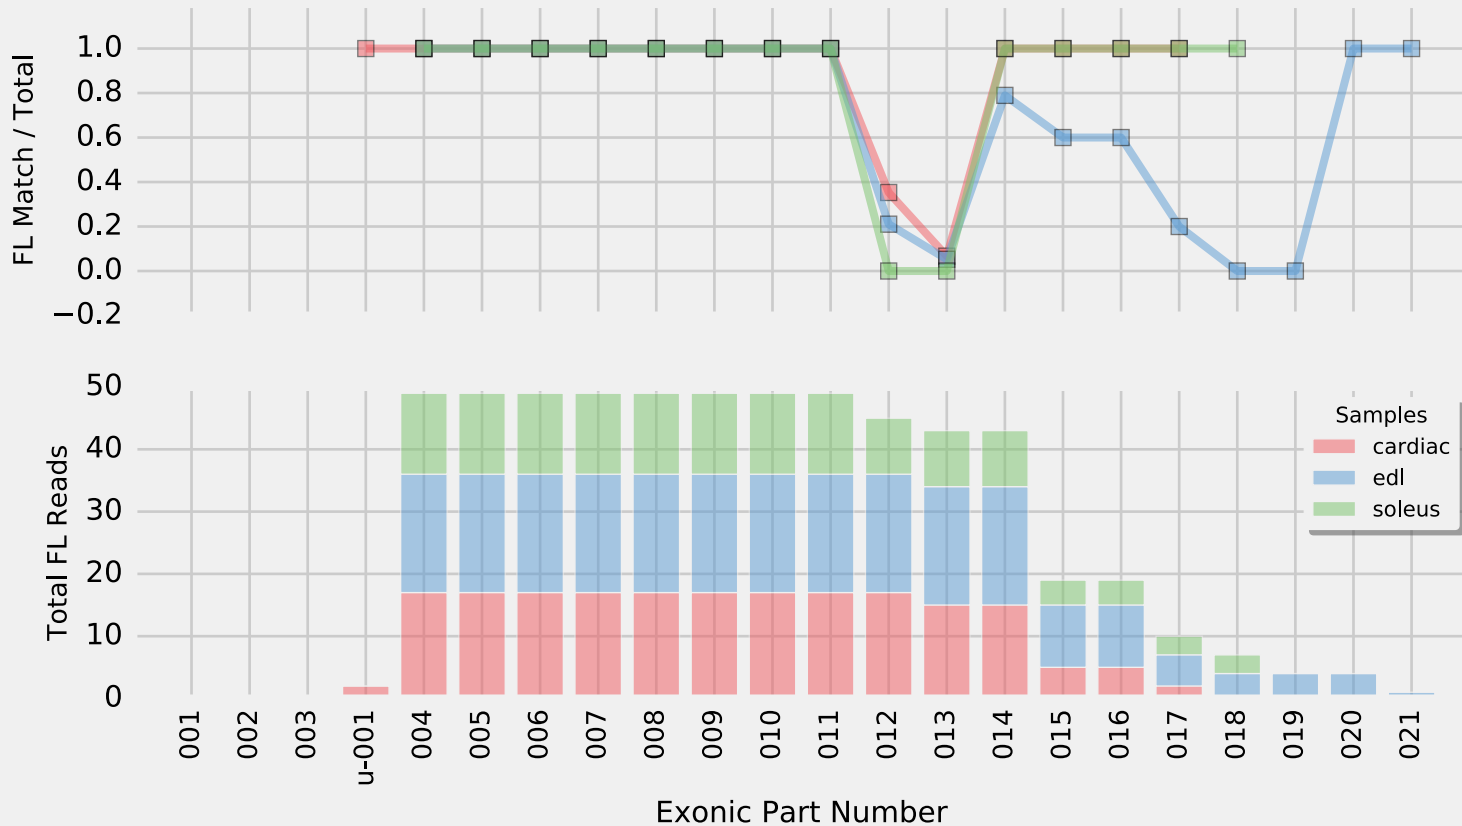

# Bcl2l13

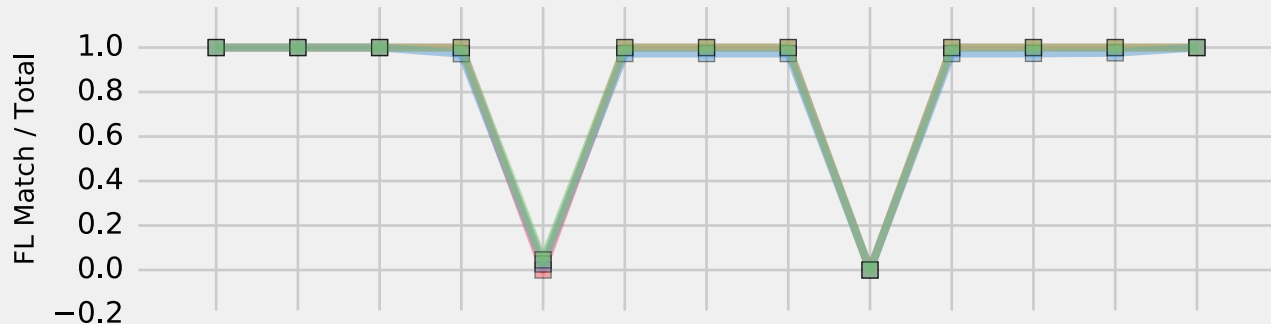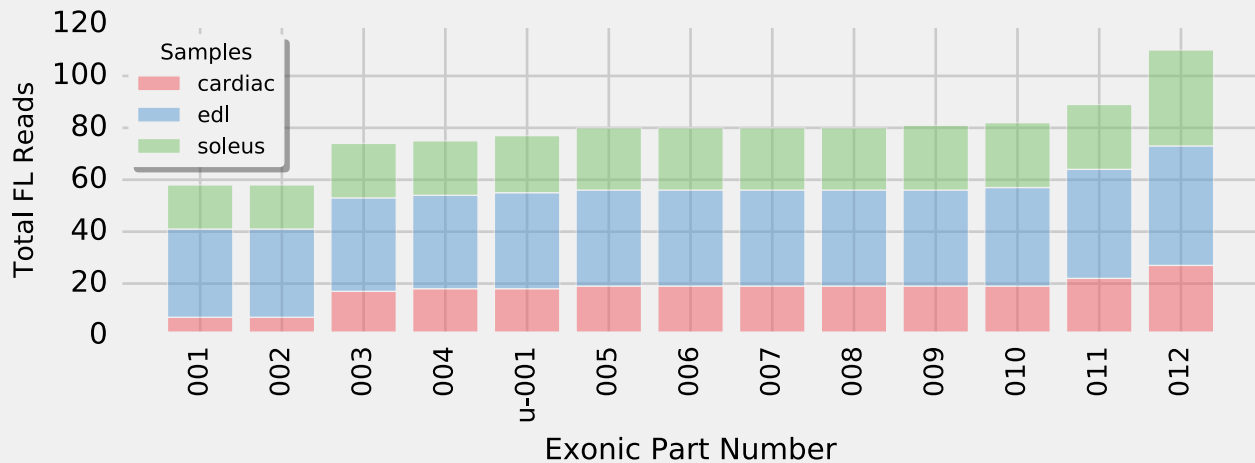

# Bclaf1

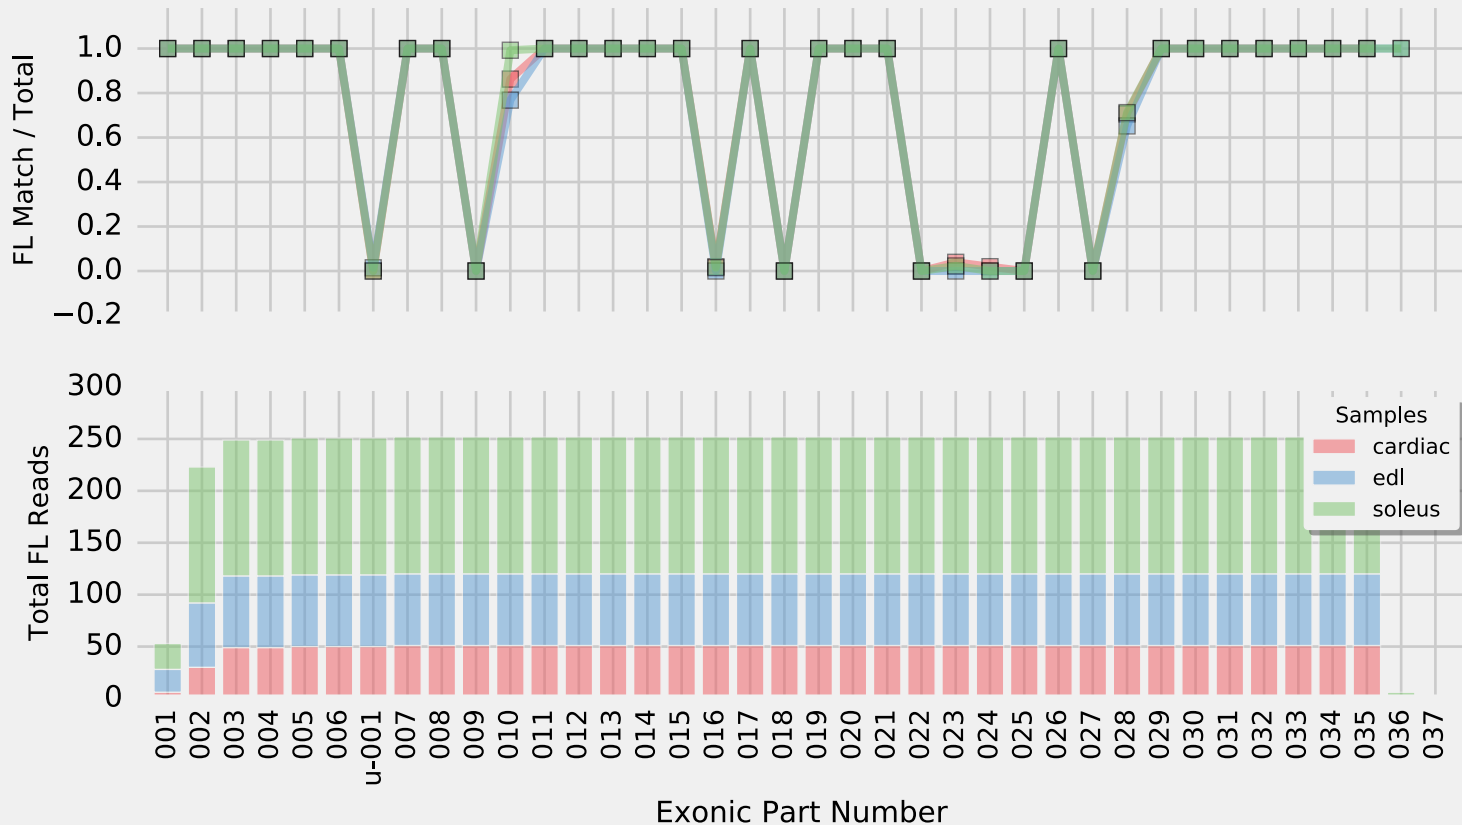

# Bmpr1a

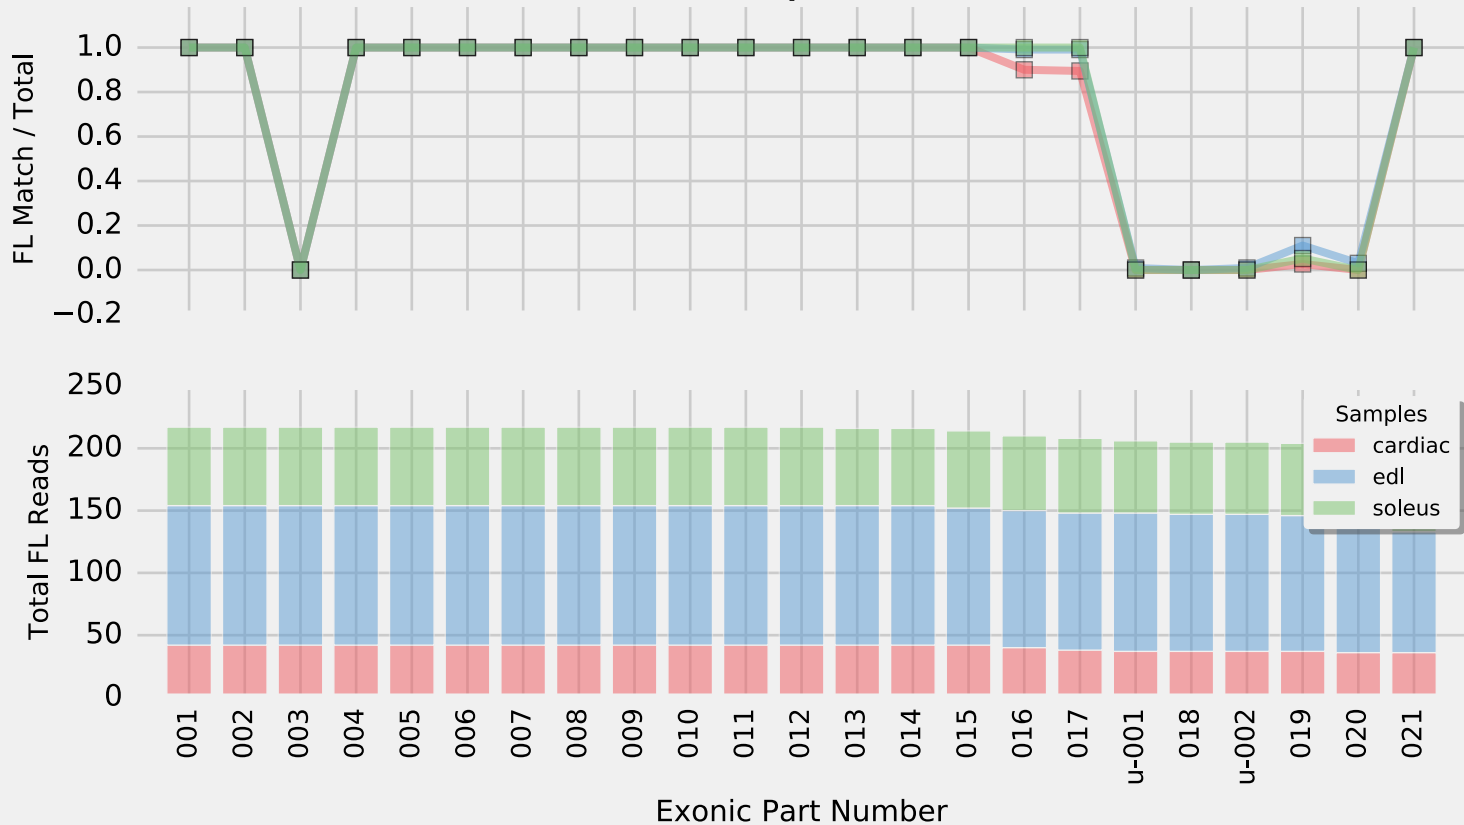

# Bmpr1b

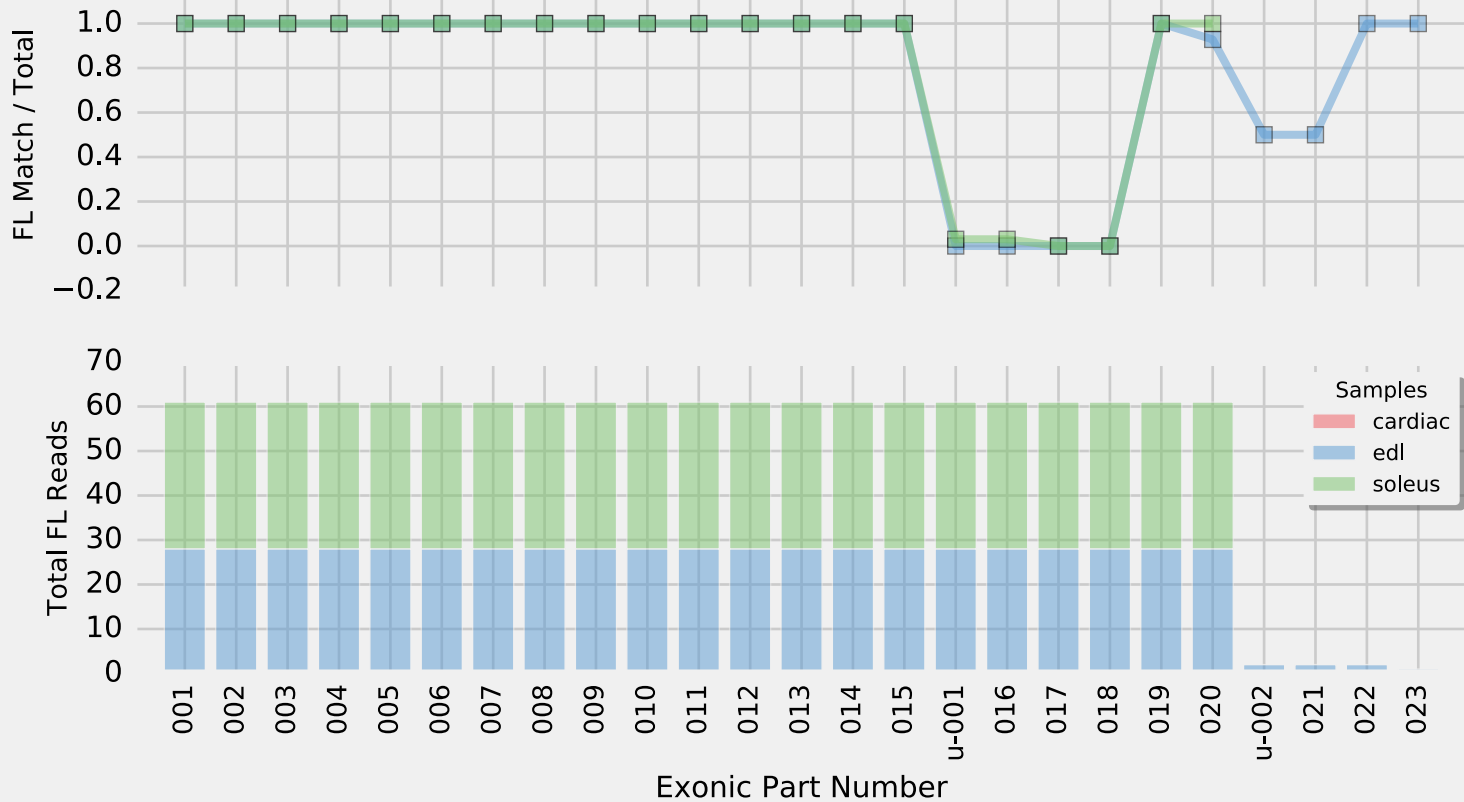

# Brwd1

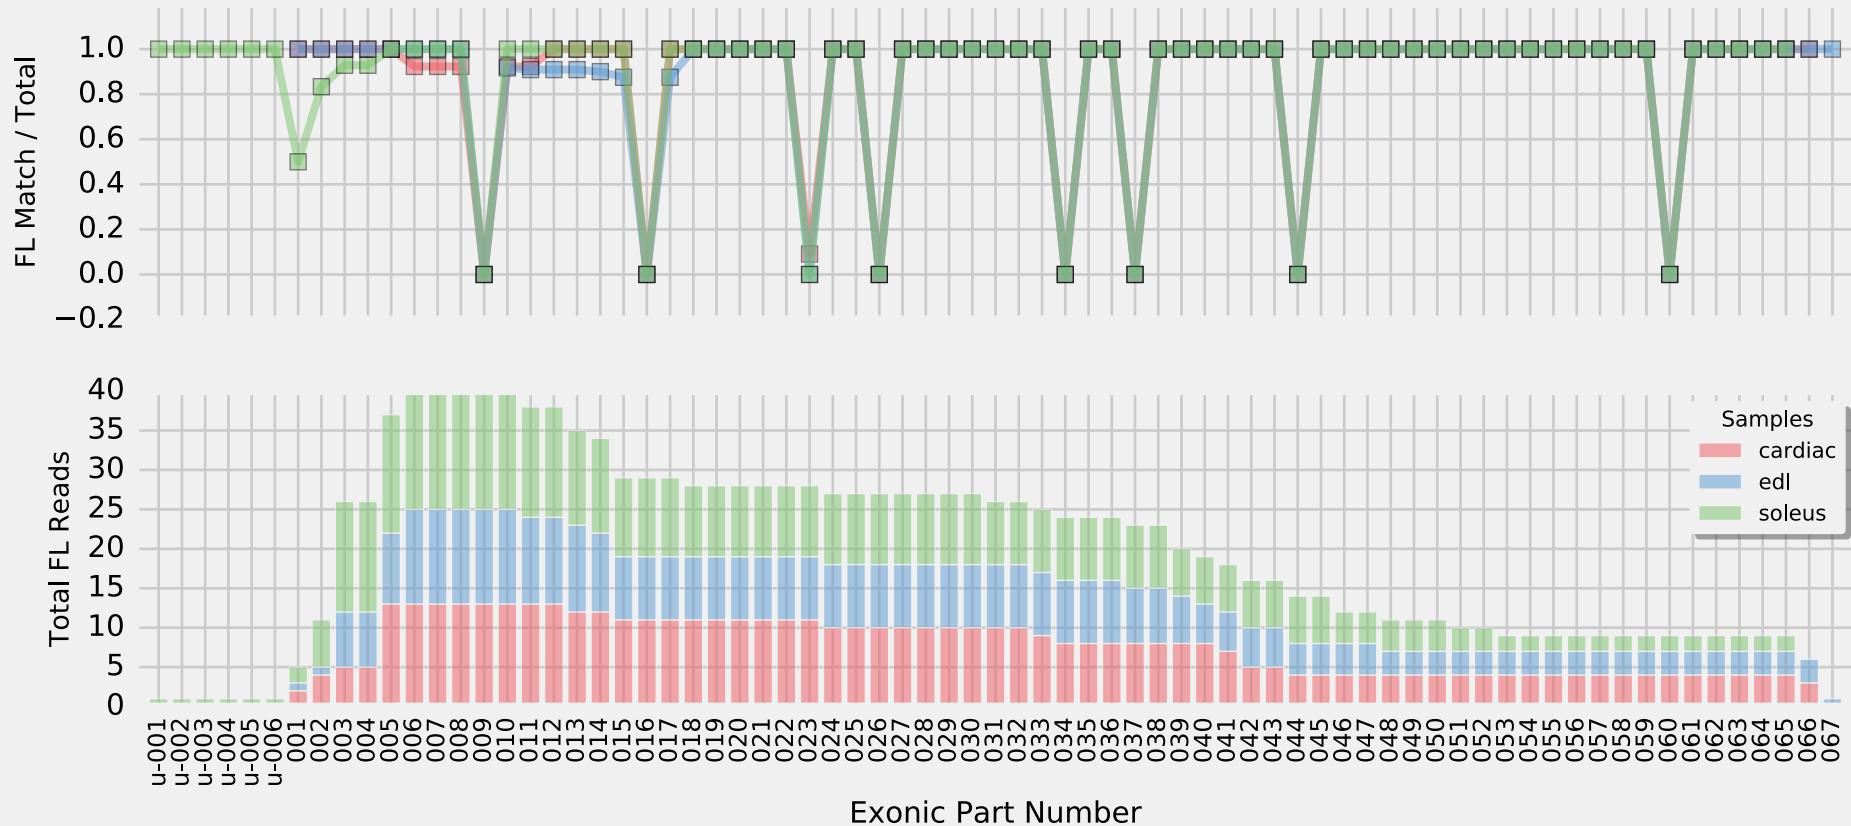



# Btaf1

FL Match / Total

1.0  
0.8  
0.6  
0.4  
0.2  
0.0  
-0.2

Total FL Reads

Samples  
cardiac  
edl  
soleus

001 002 003 004 005 006 007 008 009 010 011 012 013 014 015 016 017 018 u-001 019 020 021 022 023 024 025 026 027 028 029 030 031 032 033 034 035 036 037 038 u-002

Exonic Part Number

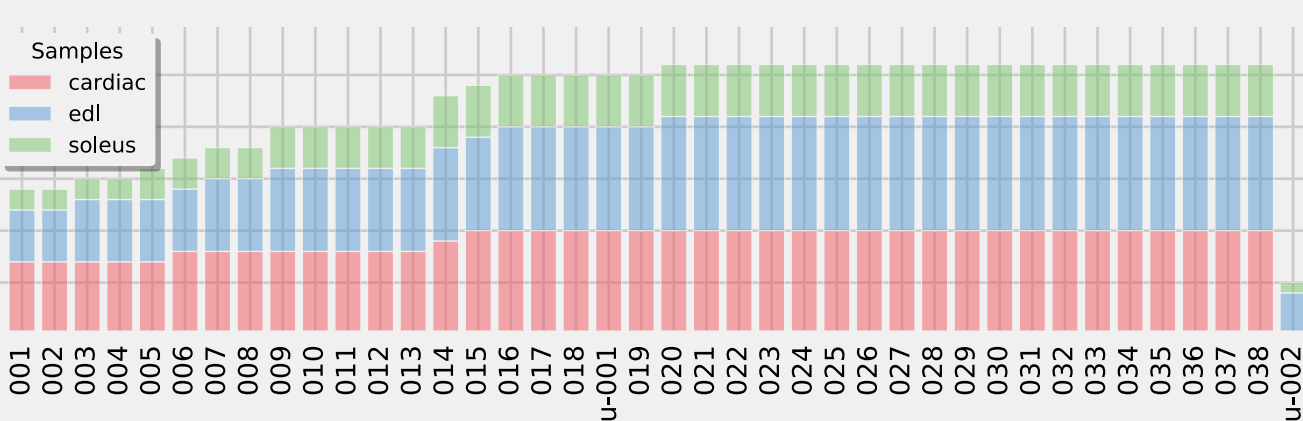

# Btbd7

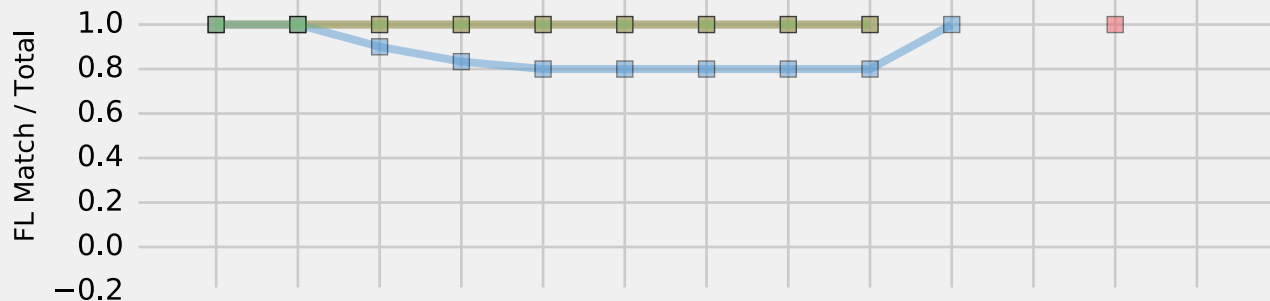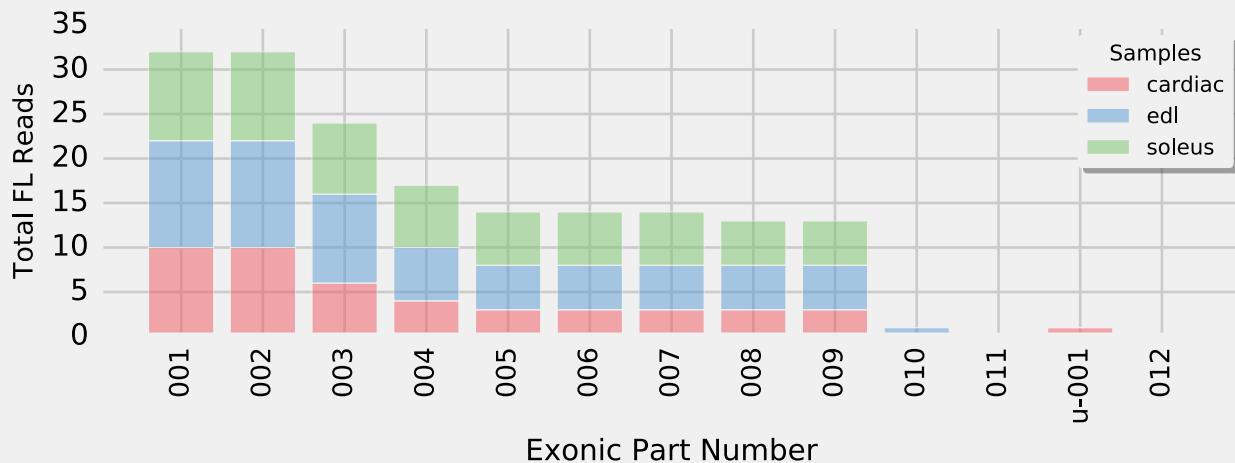

# Cacna1c

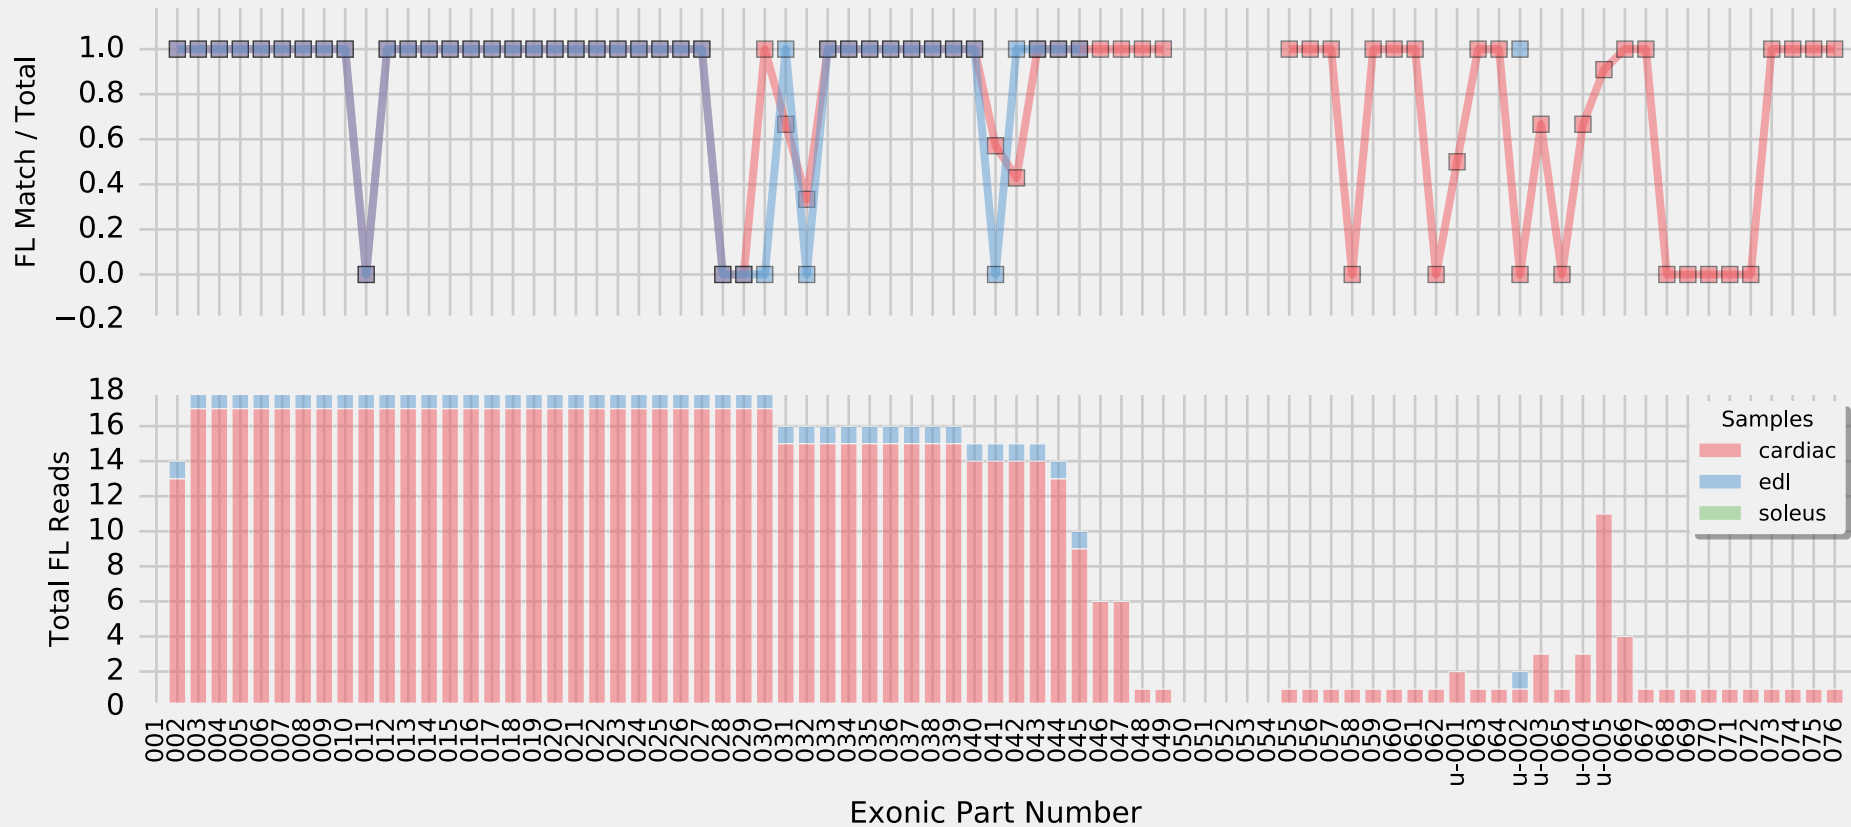

# Cacna1s

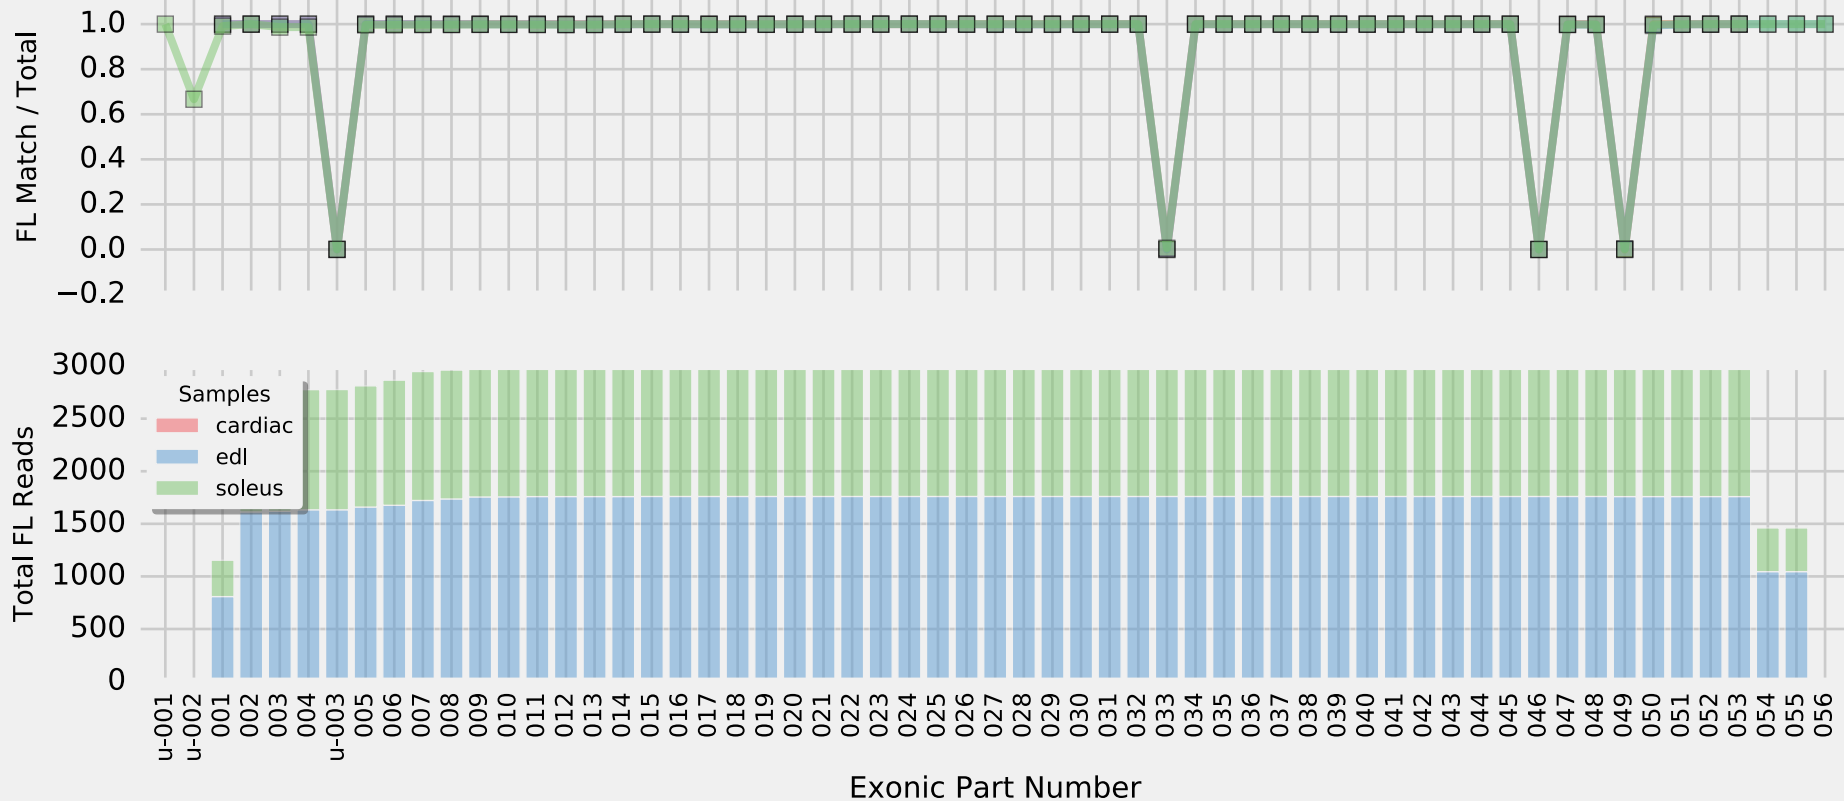

# Cacna2d1

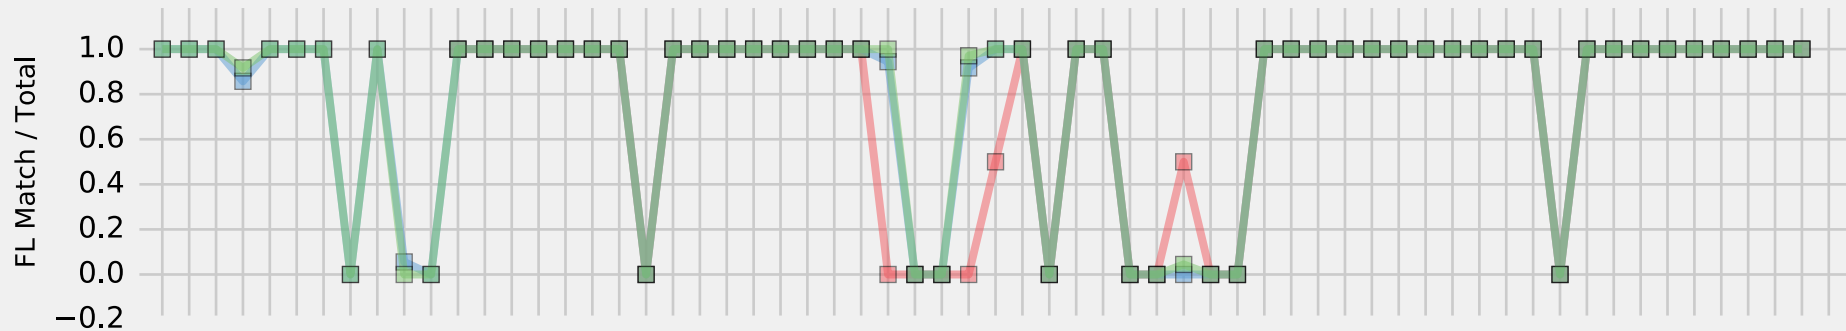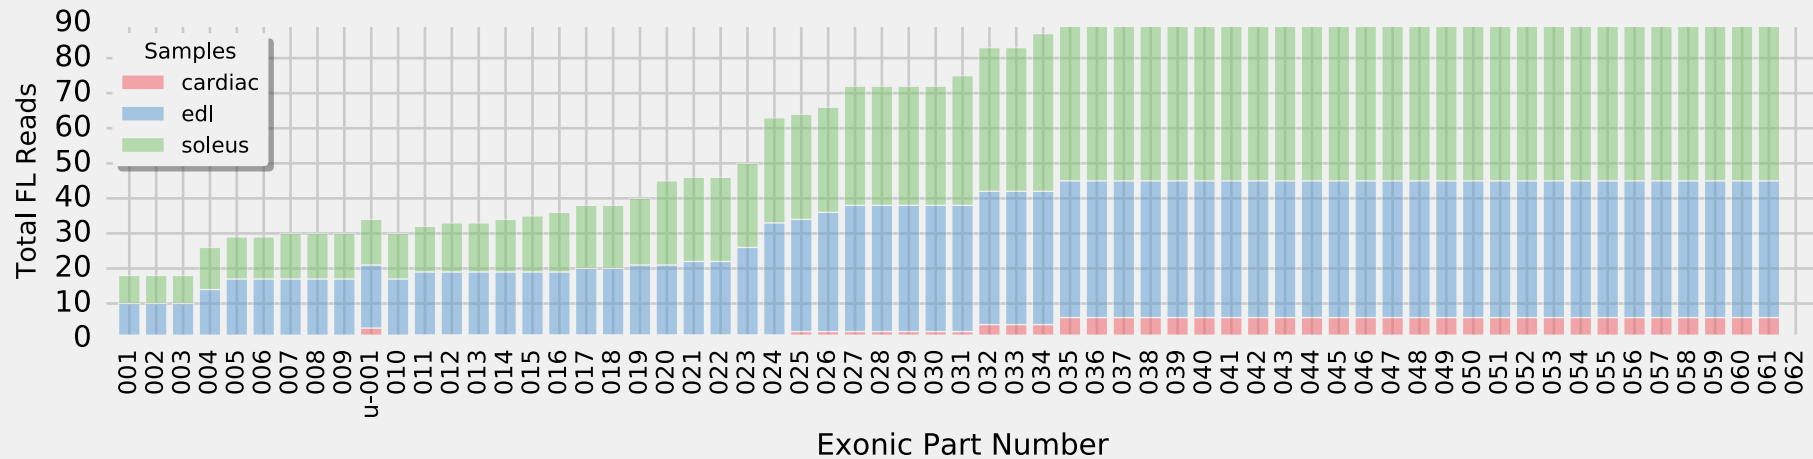

# Cacul1

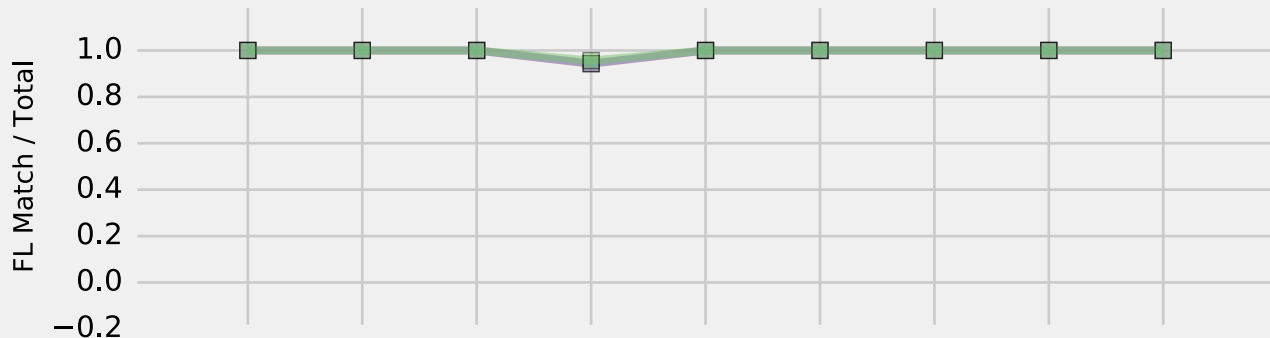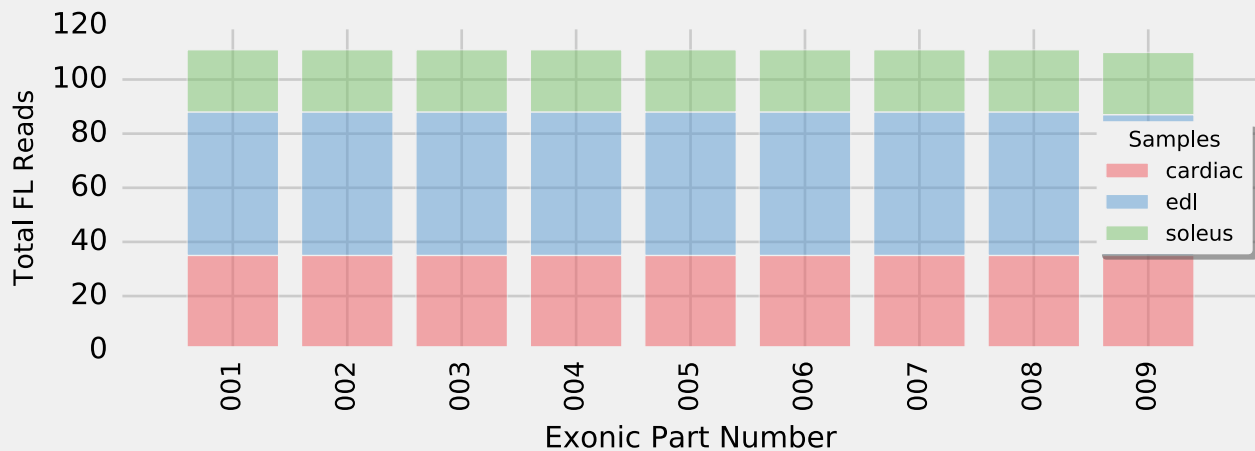

# Cand2

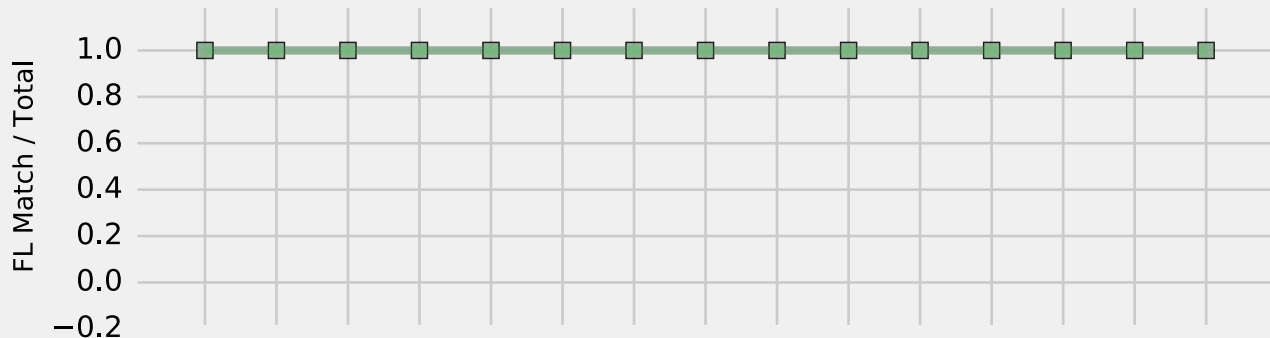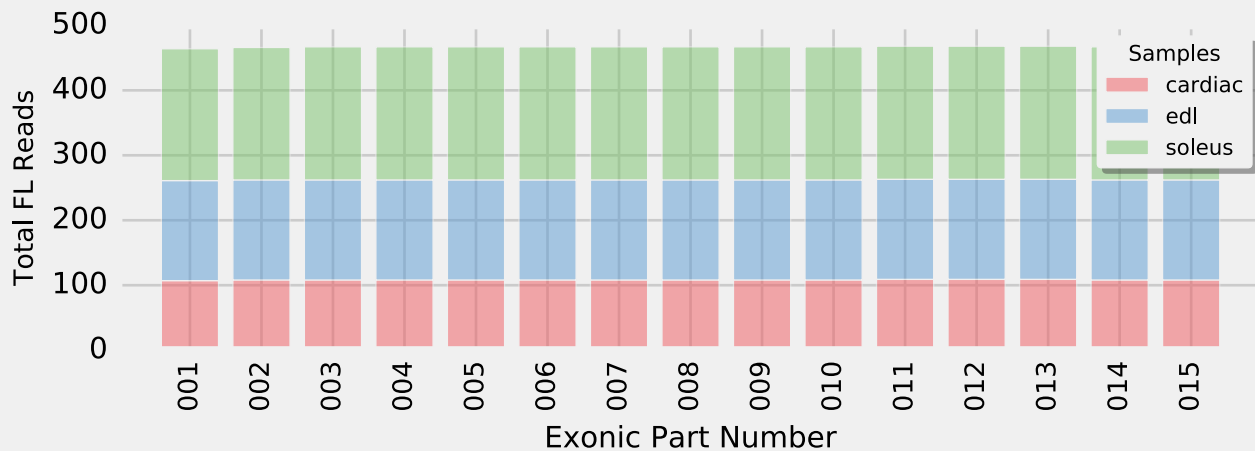

# Cbx5

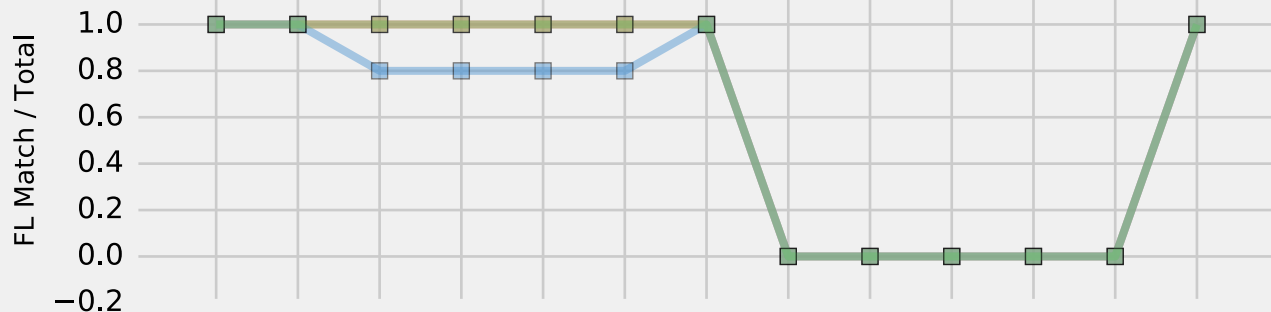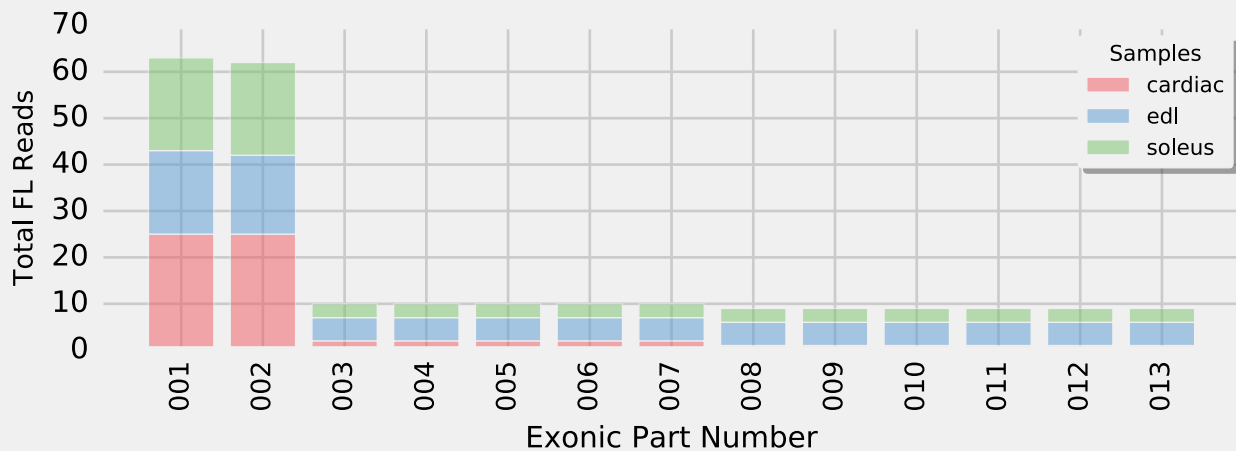



# Ccdc141

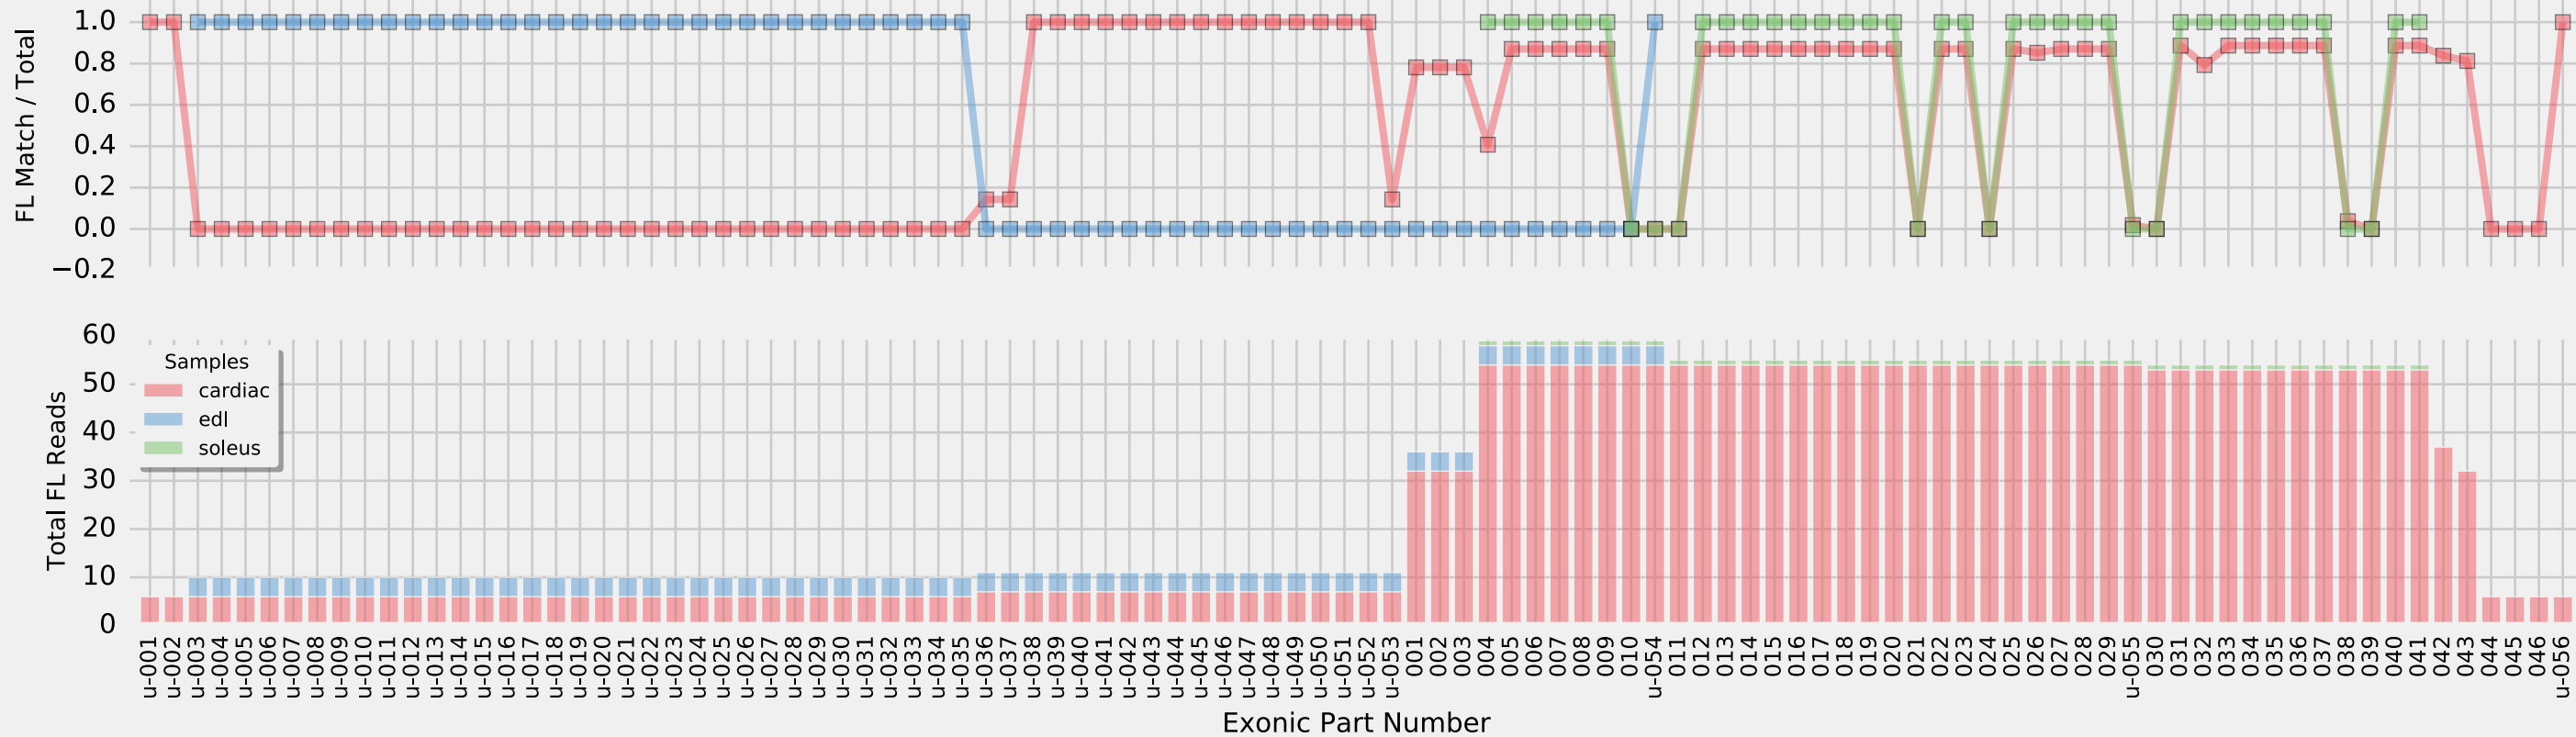

# Ccdc50

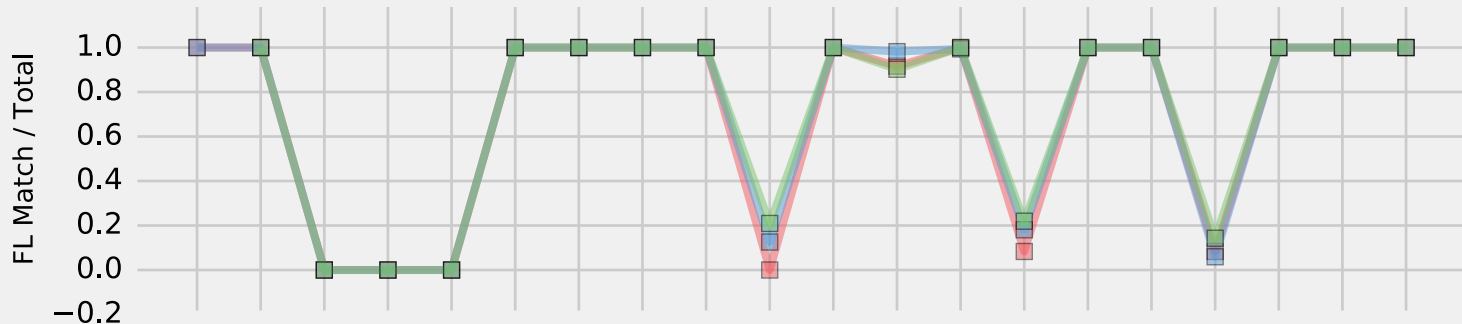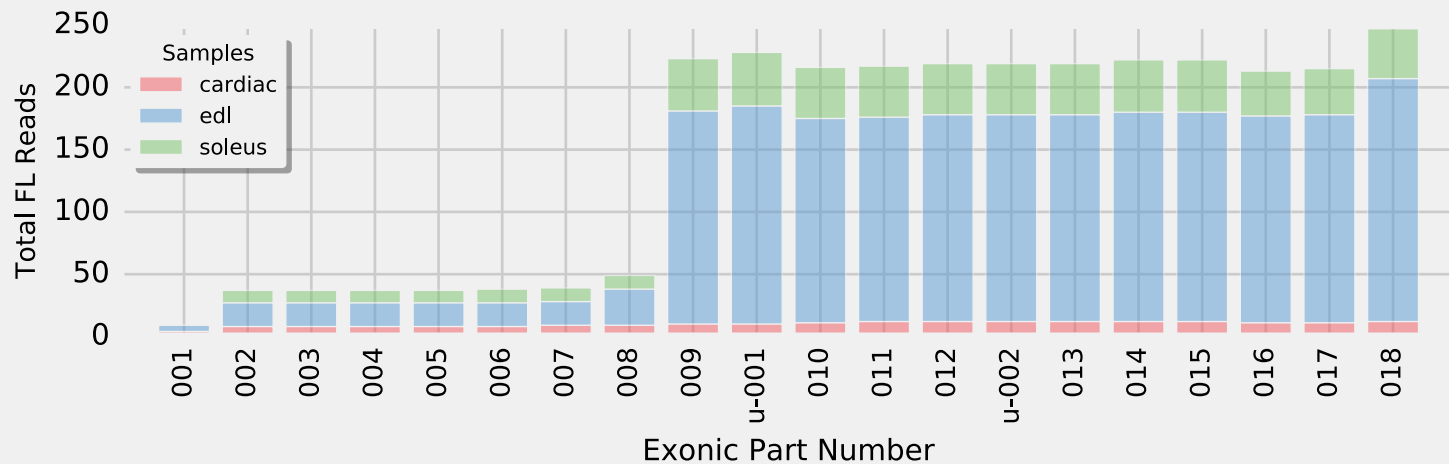

# Ccdc93

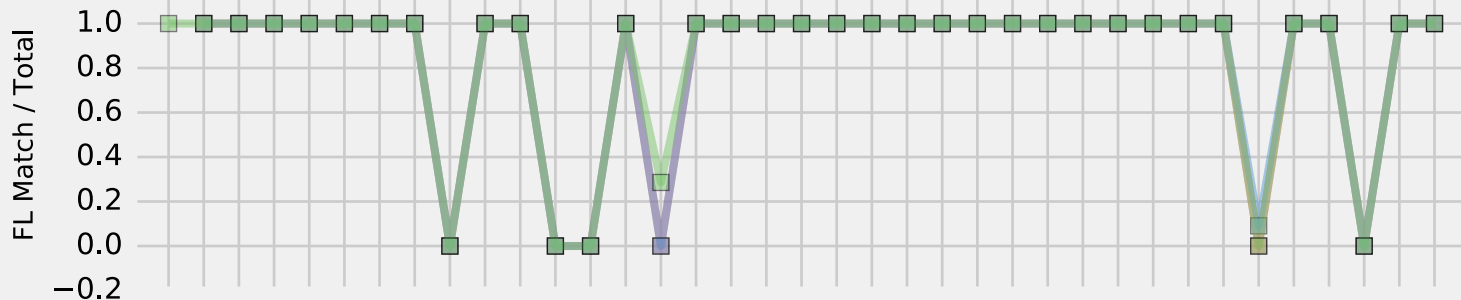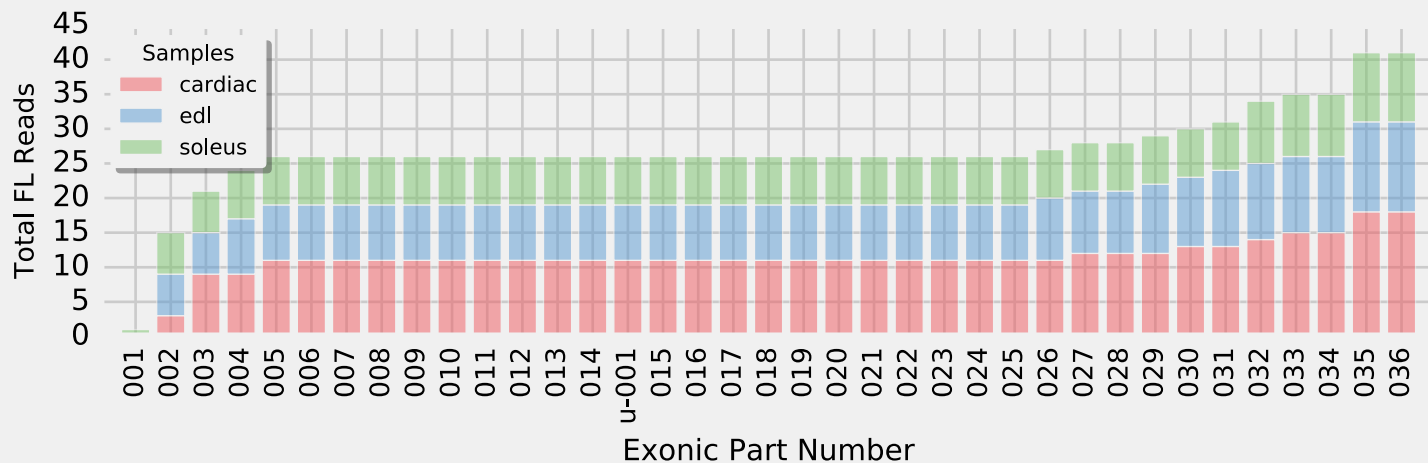

# Ccser2

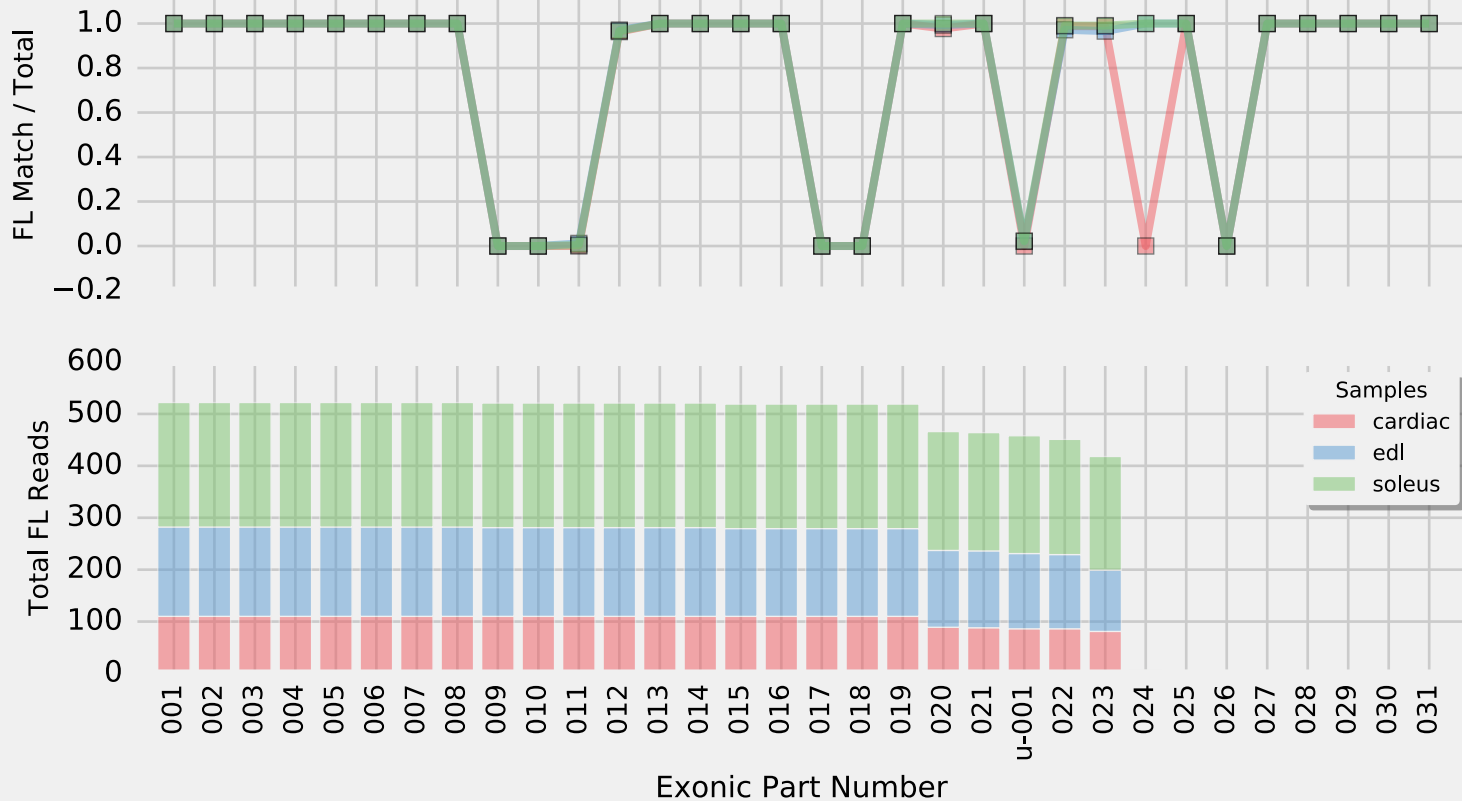

# Cd93

FL Match / Total

1.0  
0.8  
0.6  
0.4  
0.2  
0.0  
-0.2

Total FL Reads

100  
80  
60  
40  
20  
0

Samples

cardiac  
edl  
soleus

001

002

Exonic Part Number

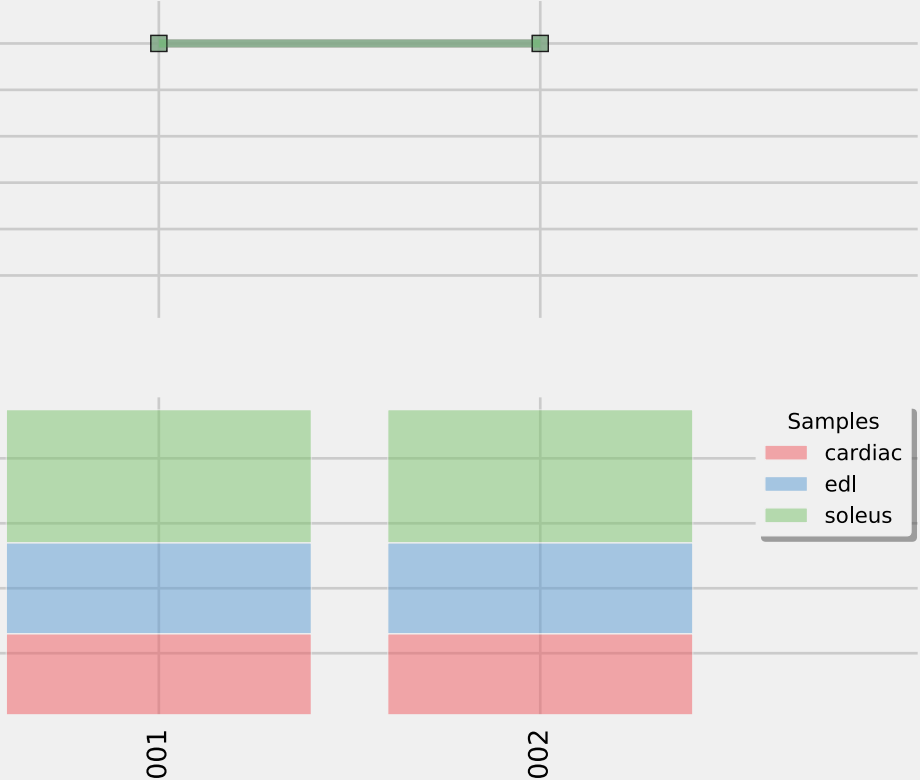

# Cdc37l1

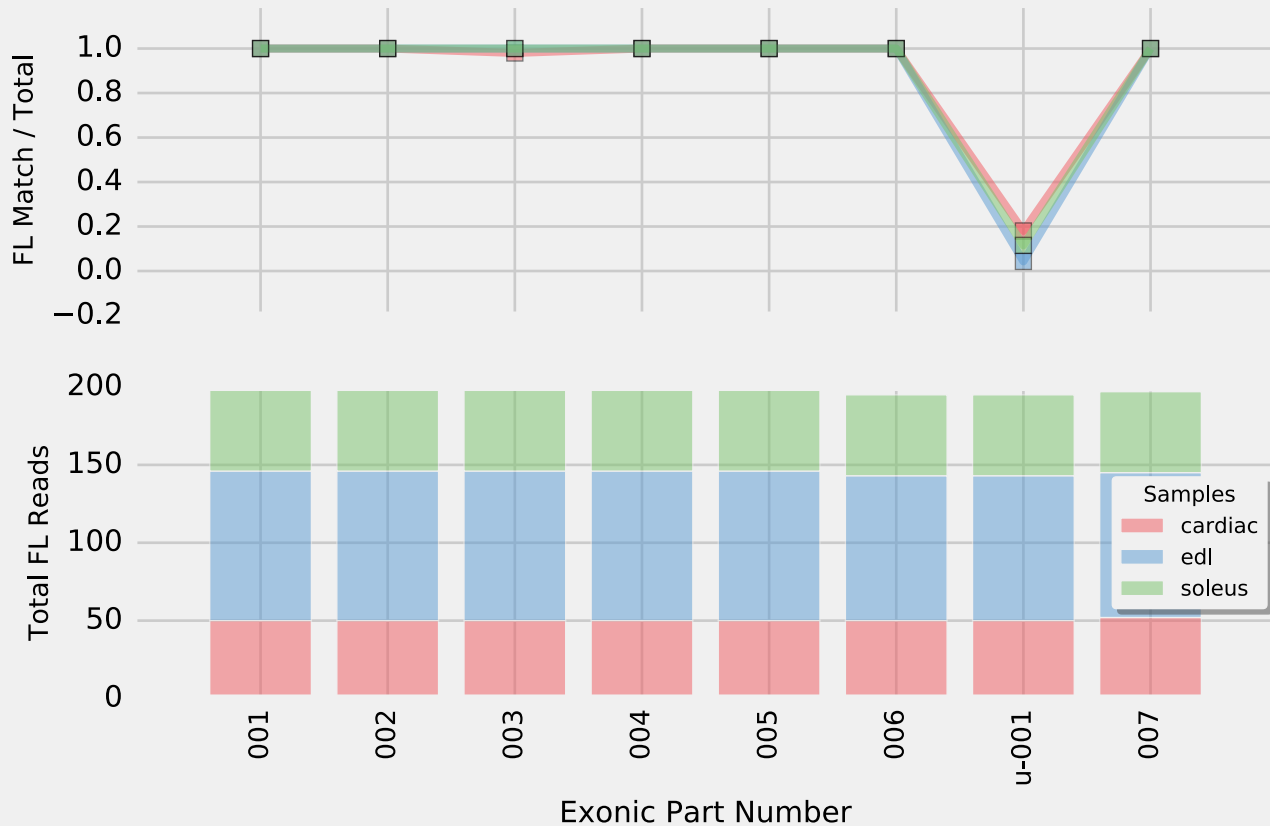

# Cds2

FL Match / Total

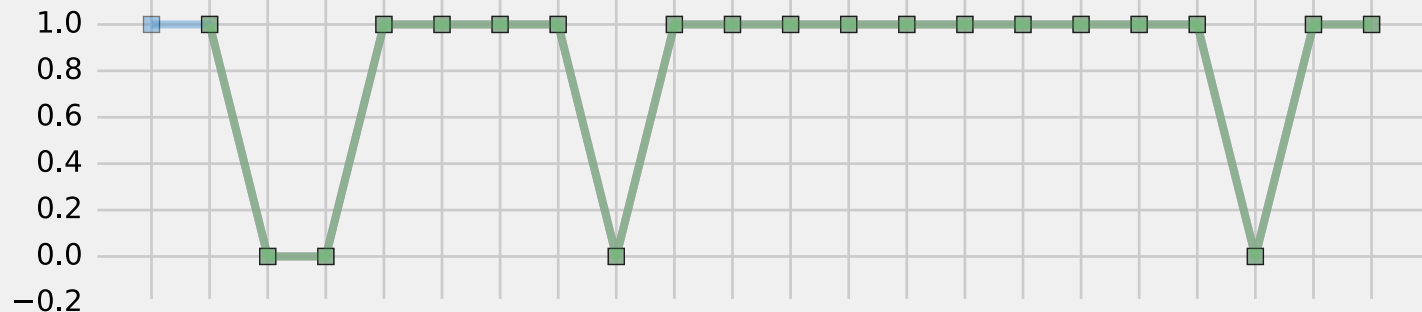

Total FL Reads

Samples

- cardiac
- edl
- soleus

Exonic Part Number

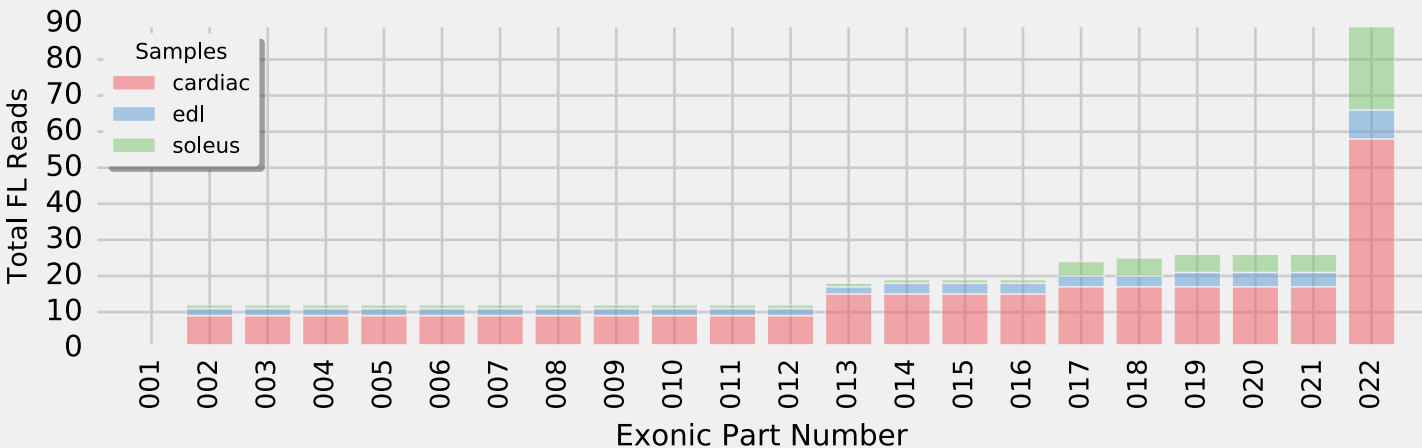

# Cep350

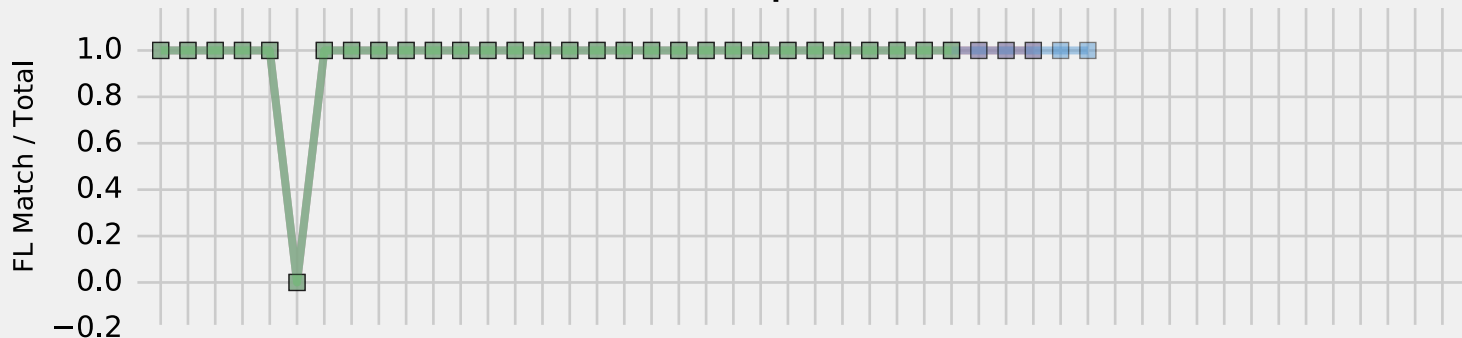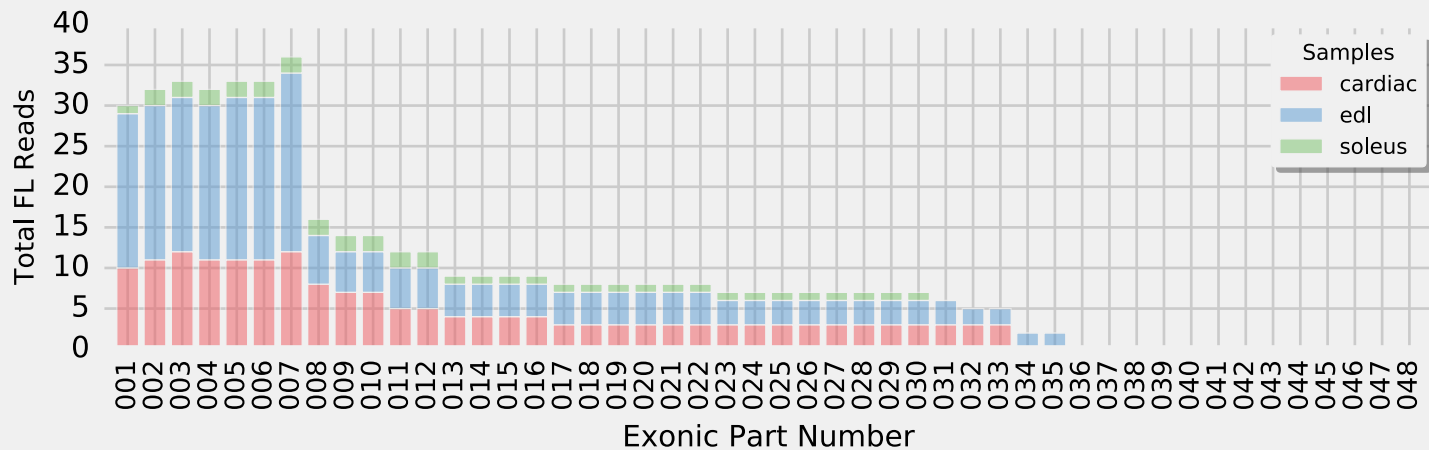



# Cep68

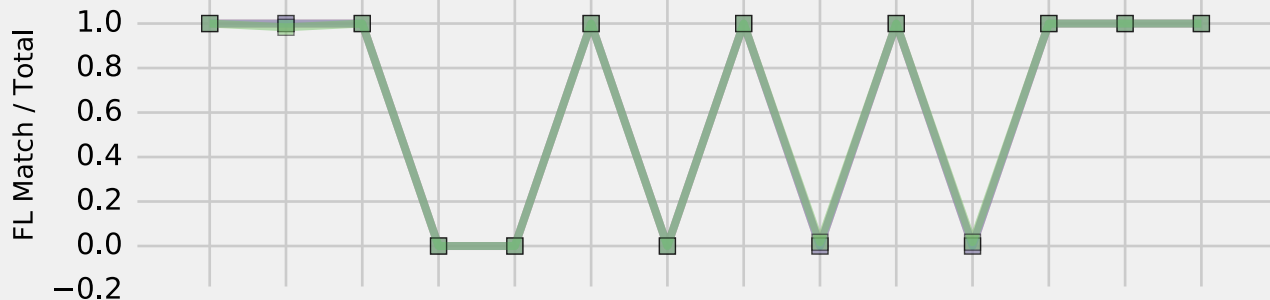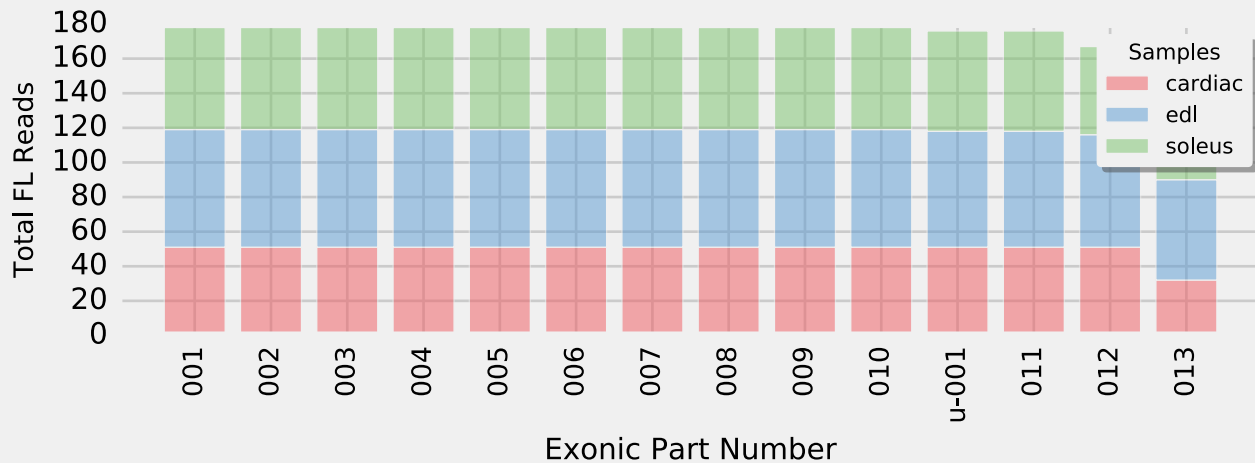

# Chd4

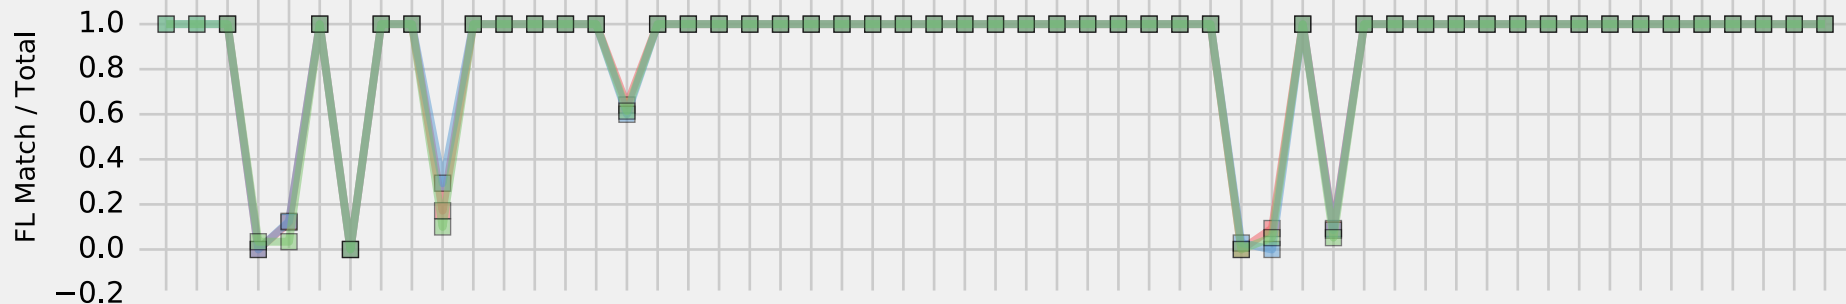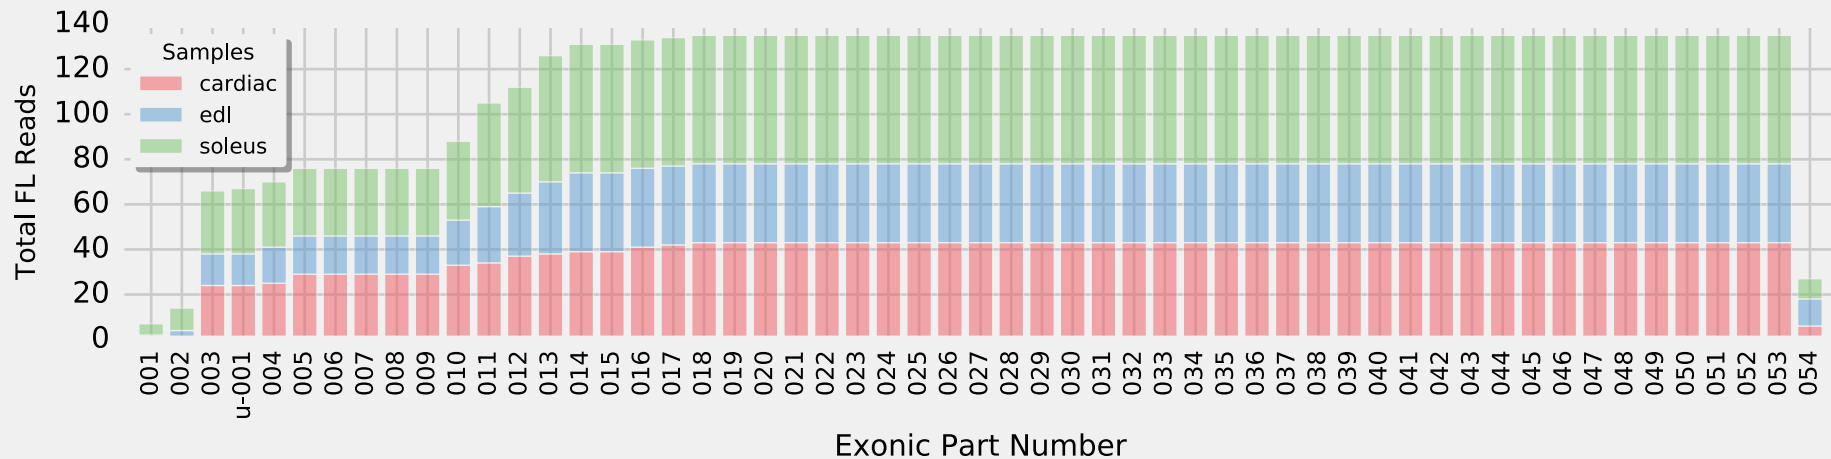

# Chd6

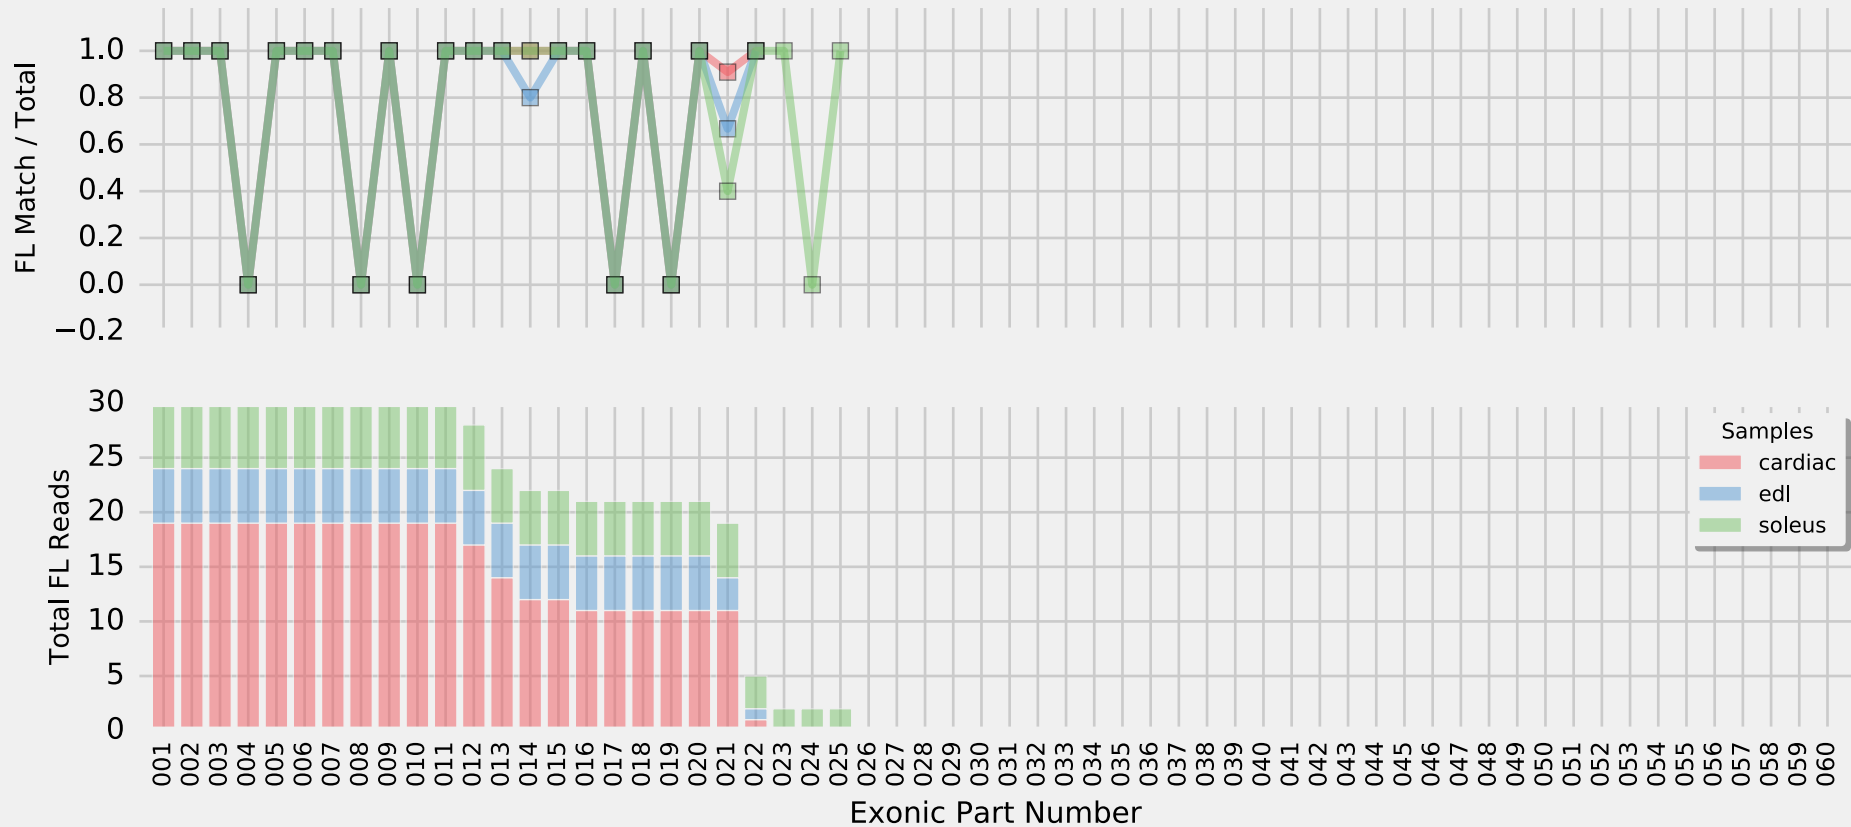

# Chrm2

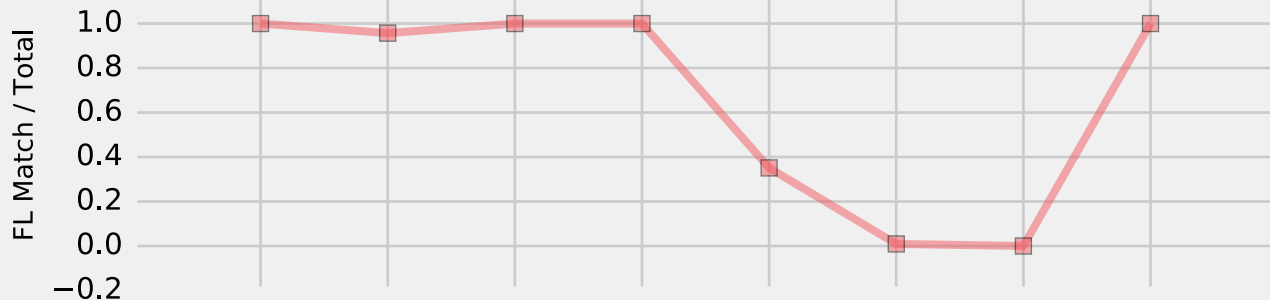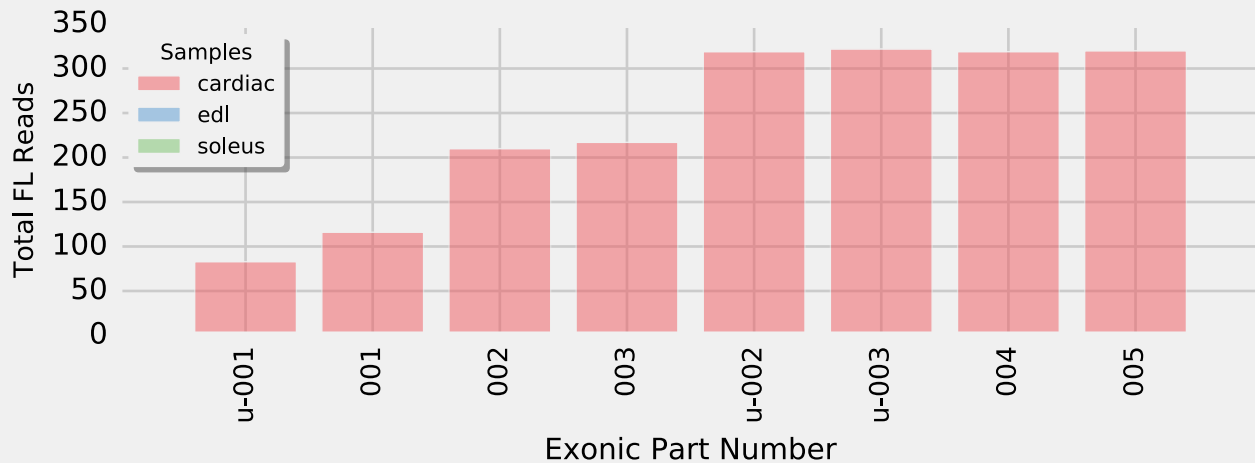

# Ckap5

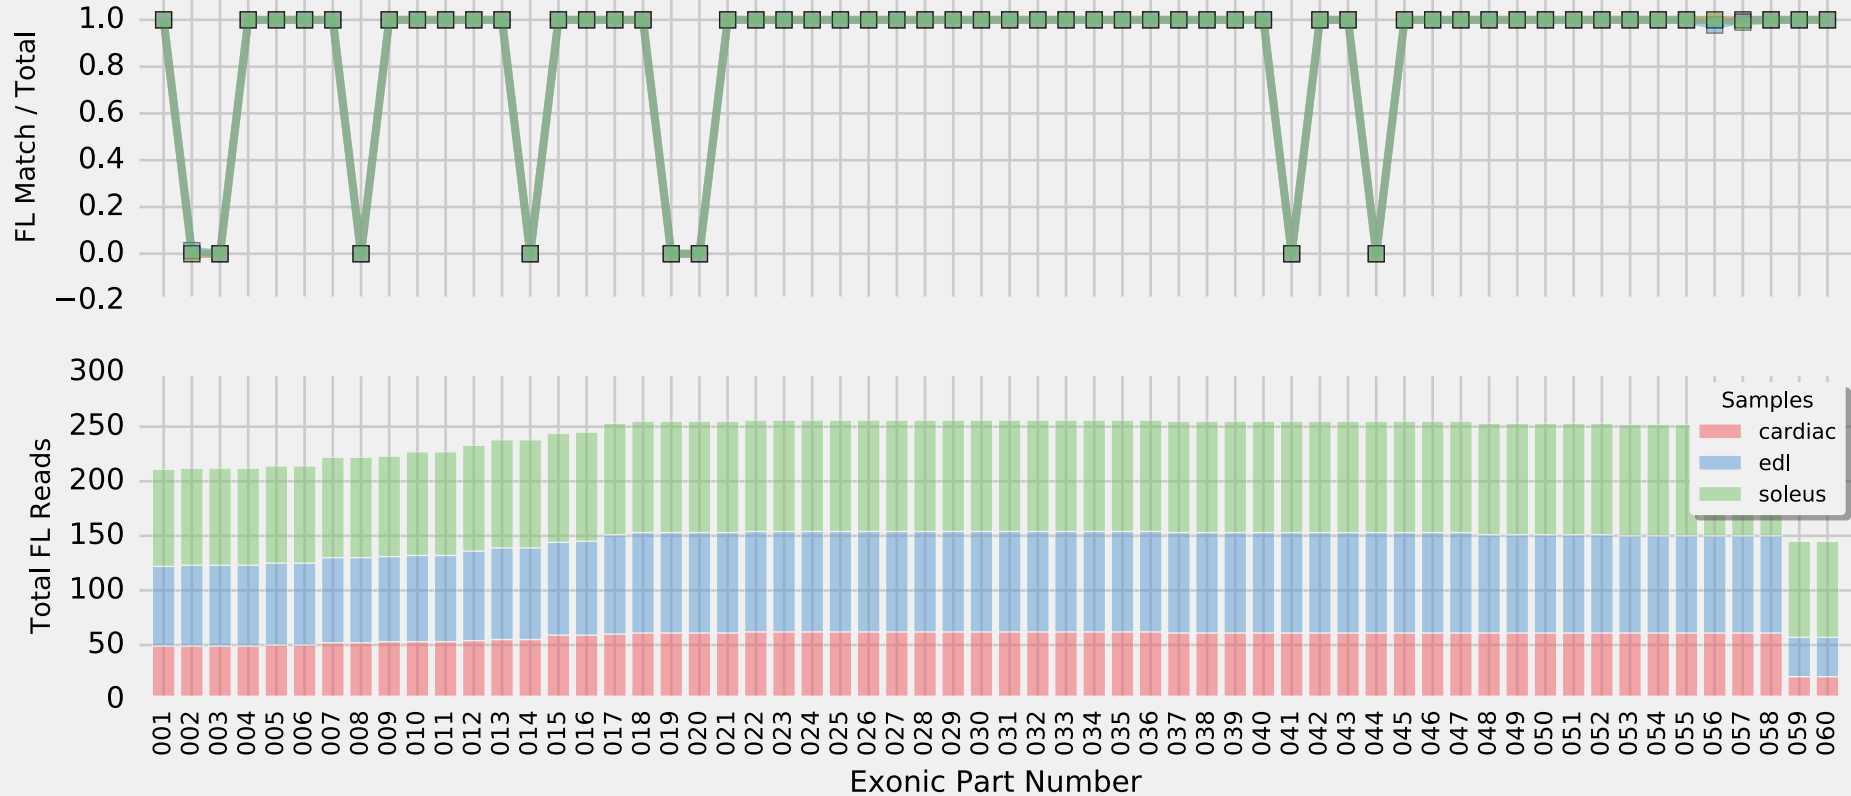

# Clasp1

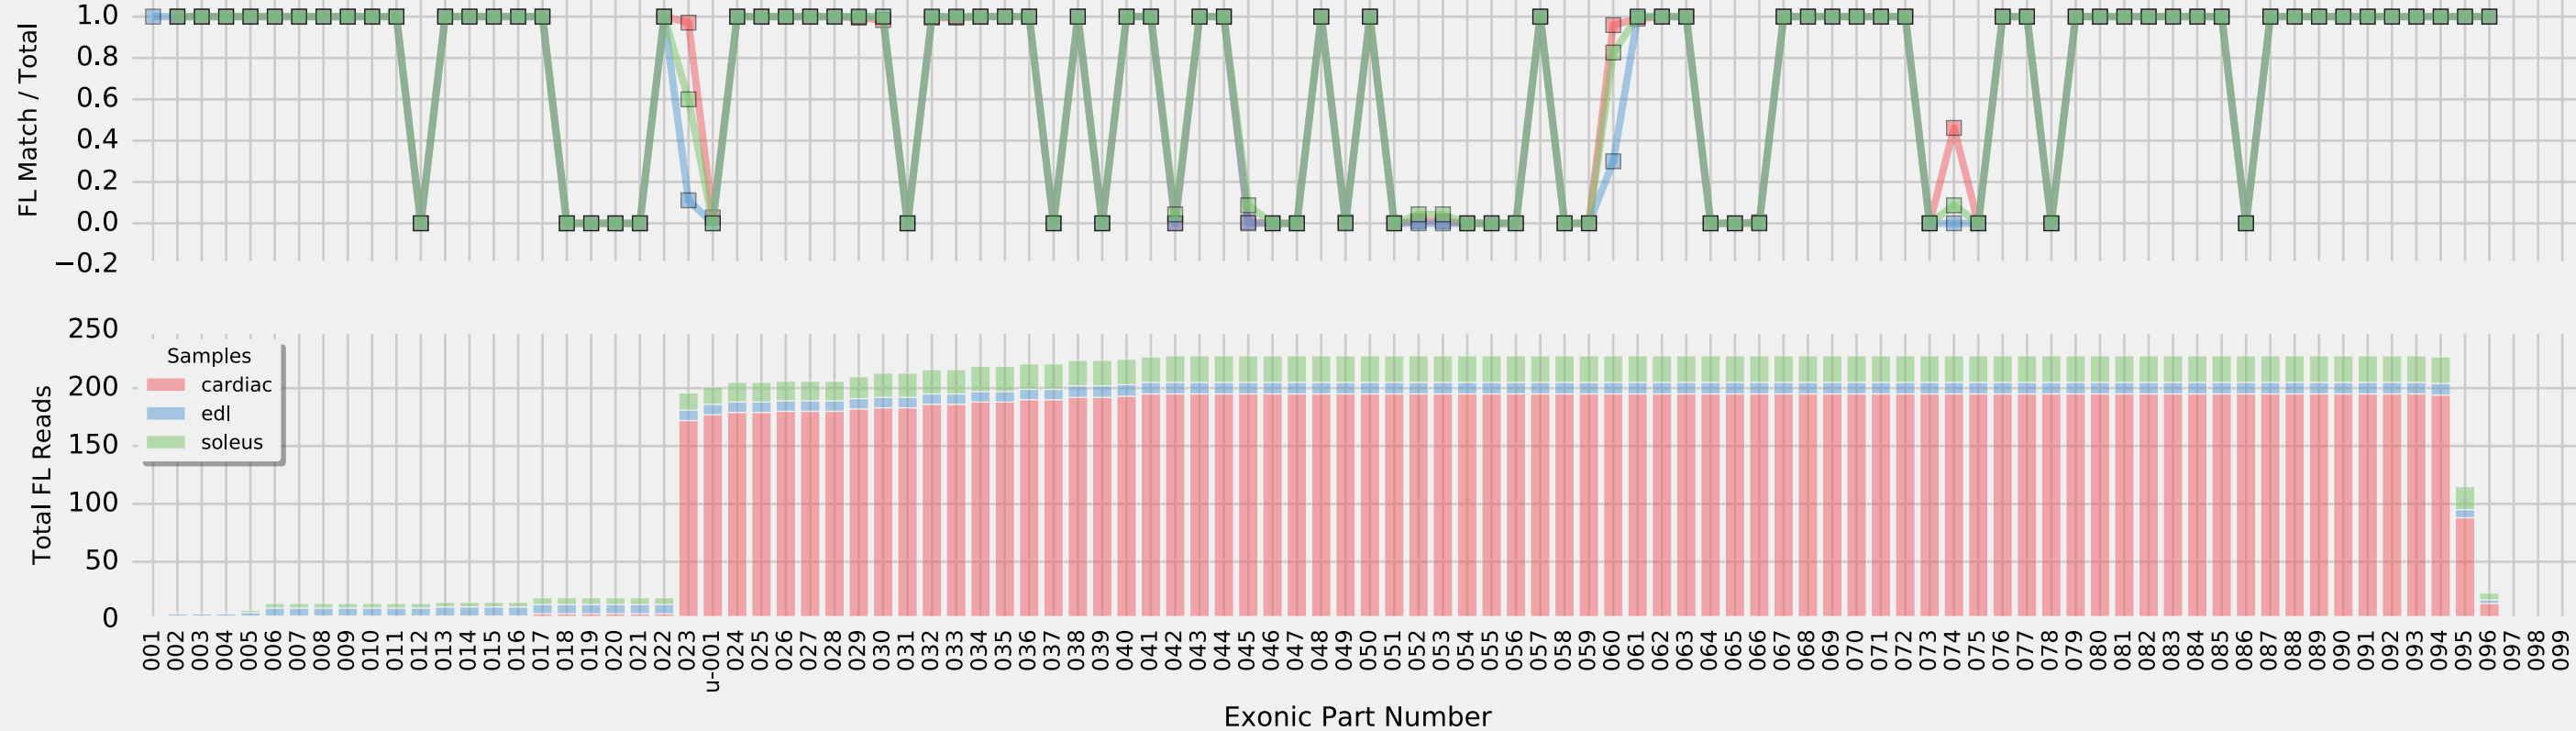

# Clasp2

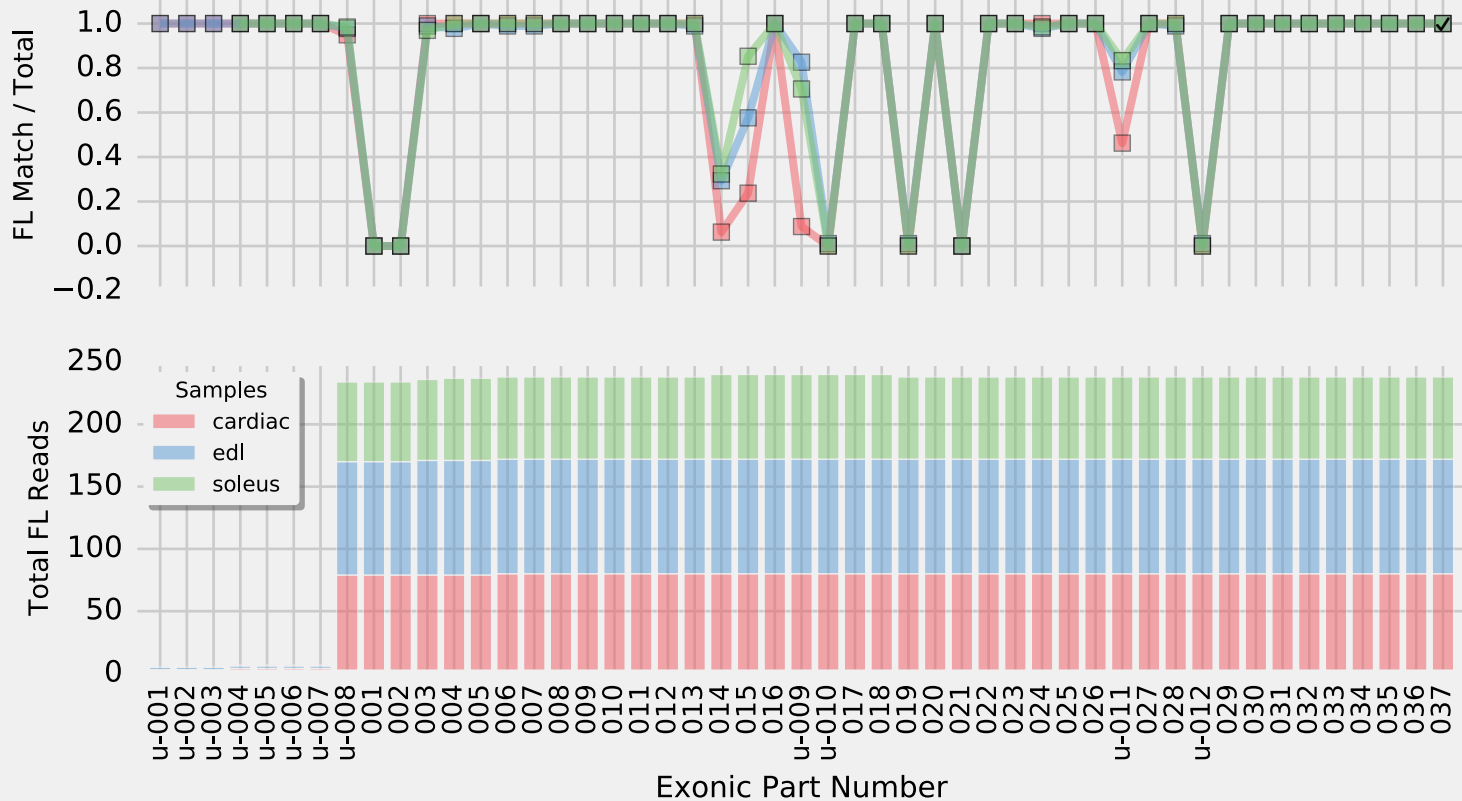

# Clcn3

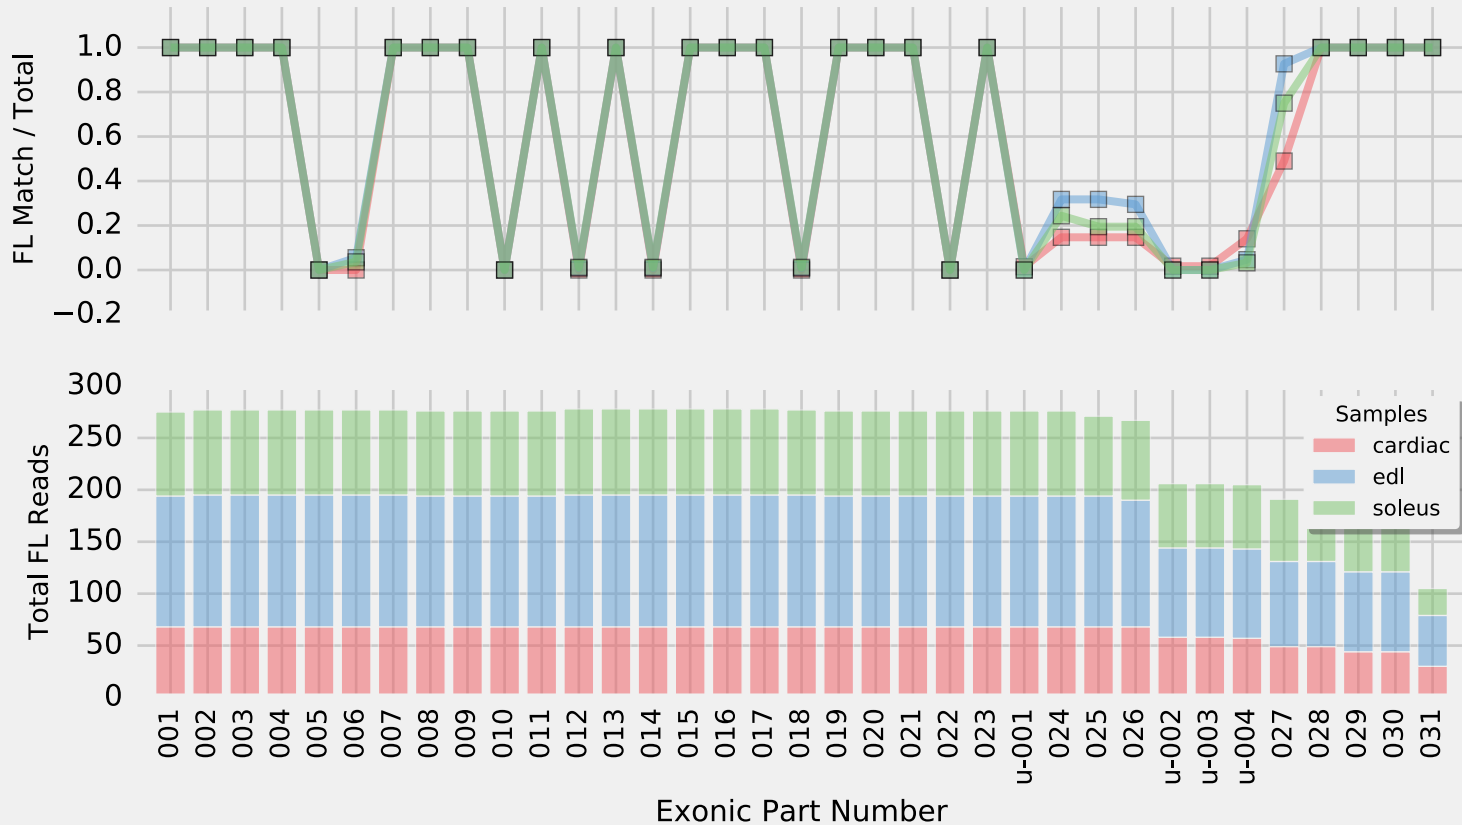



# Clic5

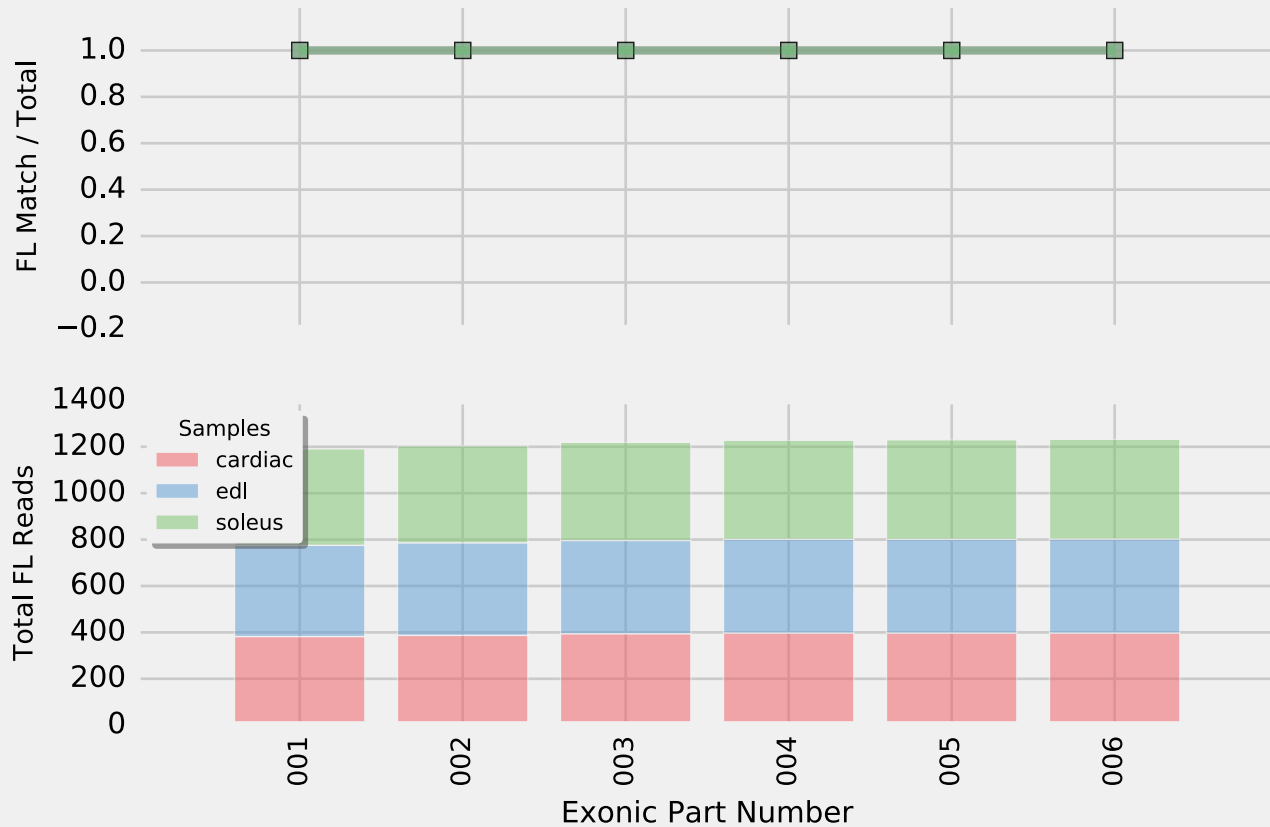

# Clip1

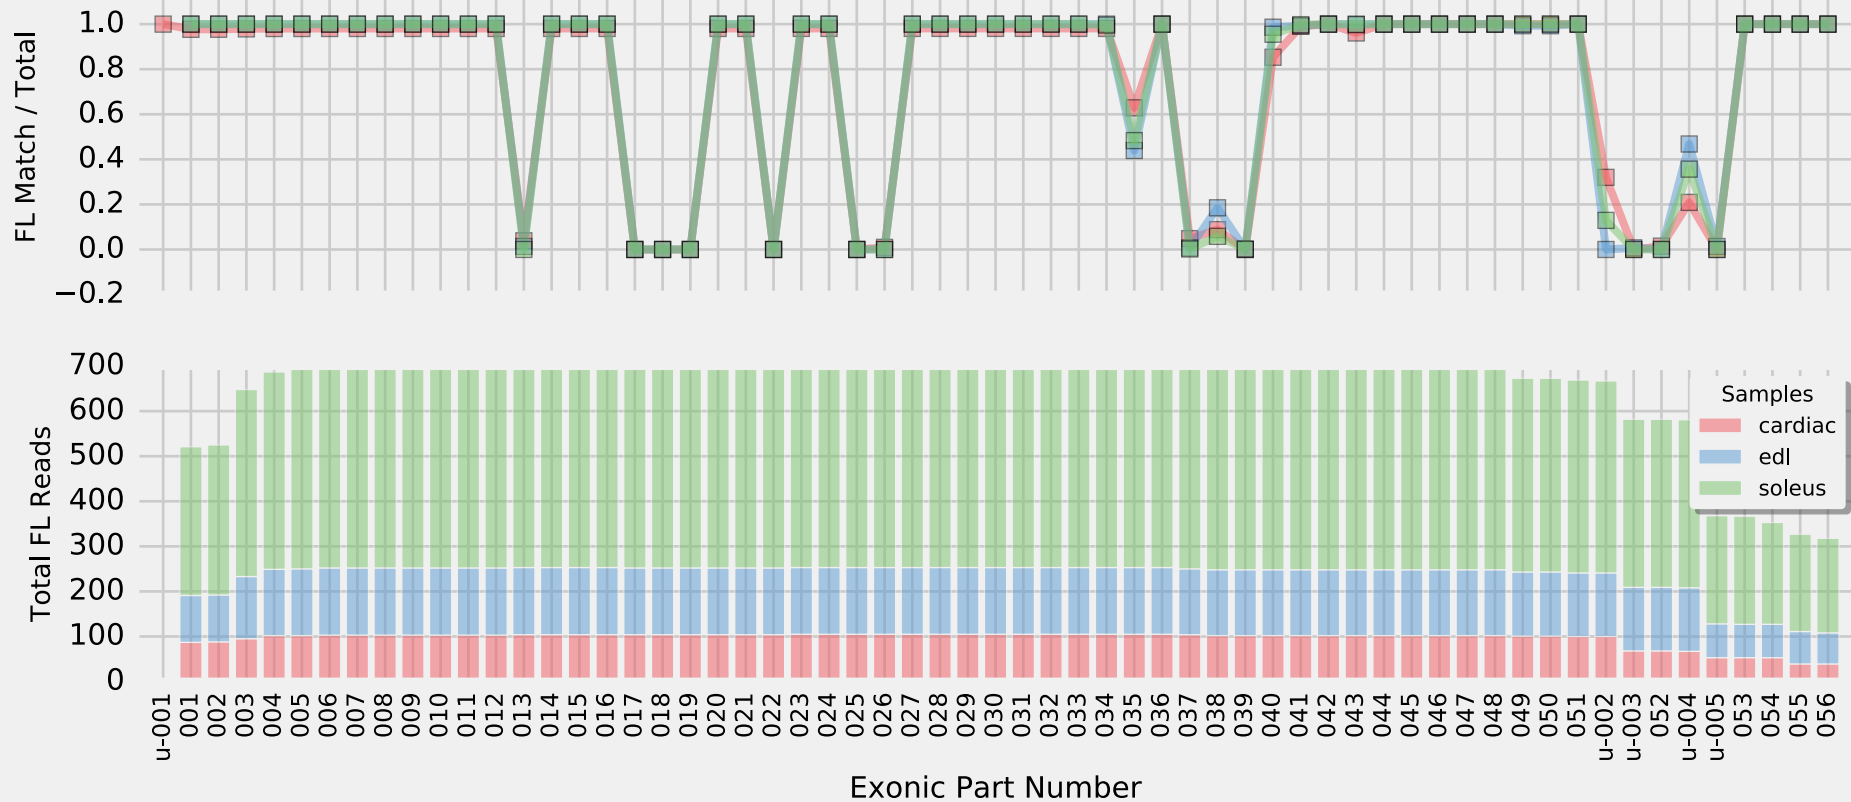

# Cln8

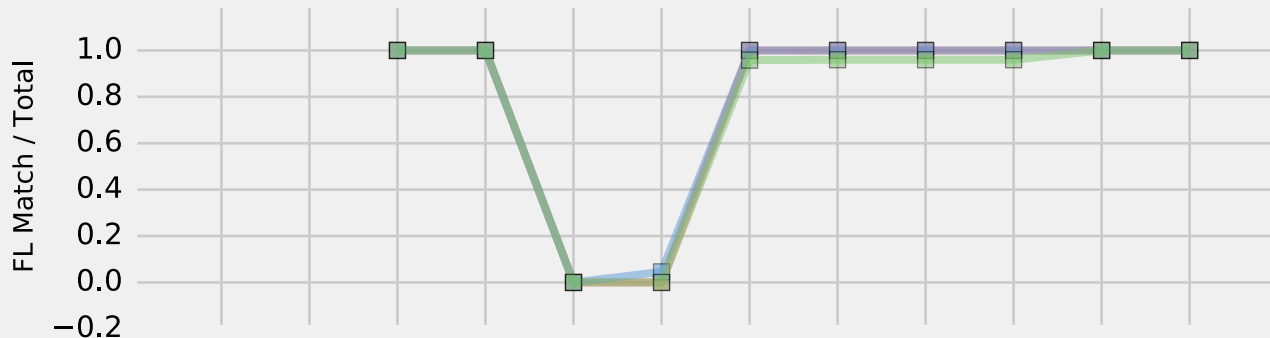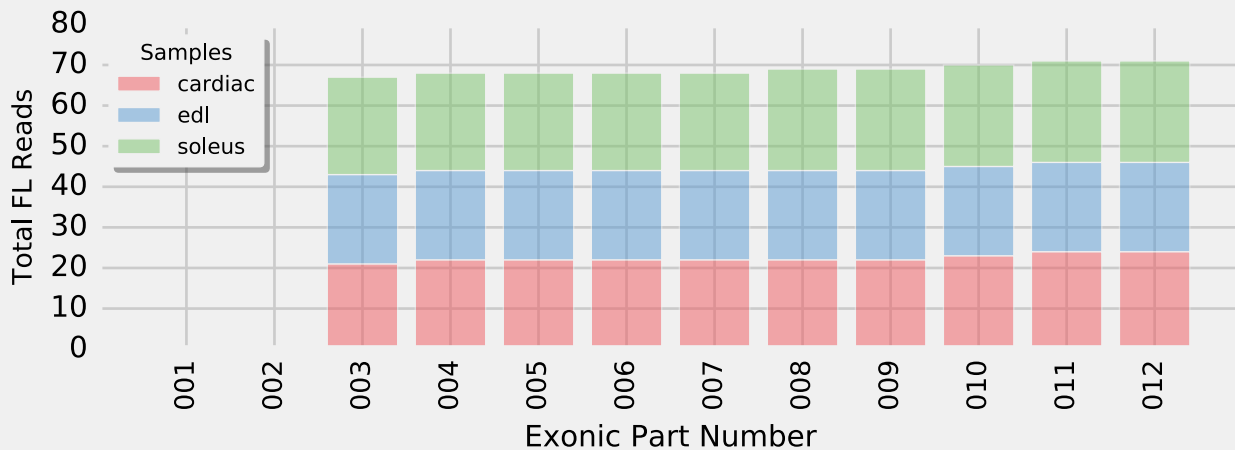

# Clock

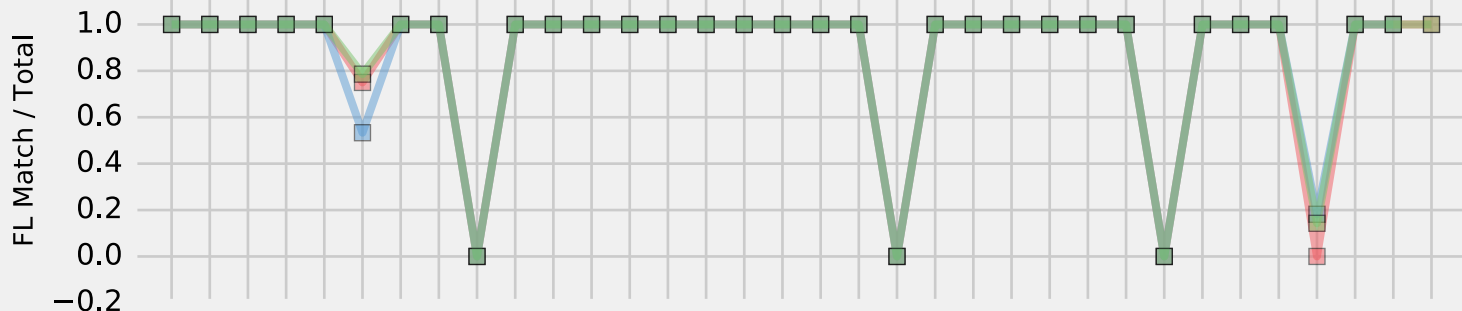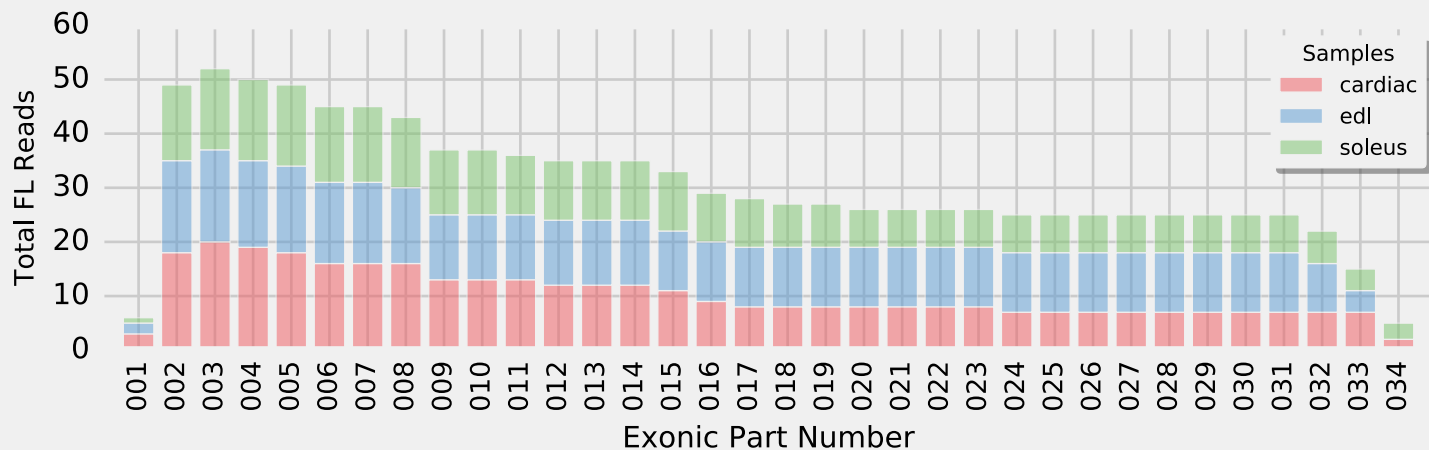

# Cltc

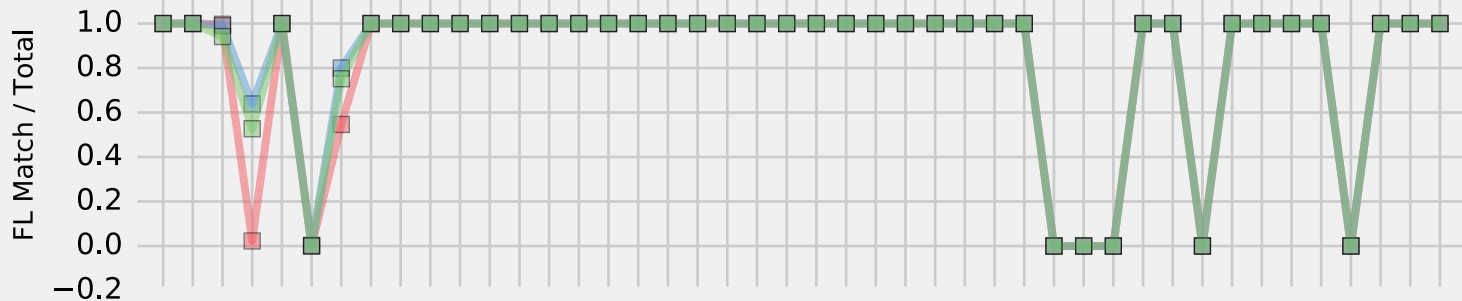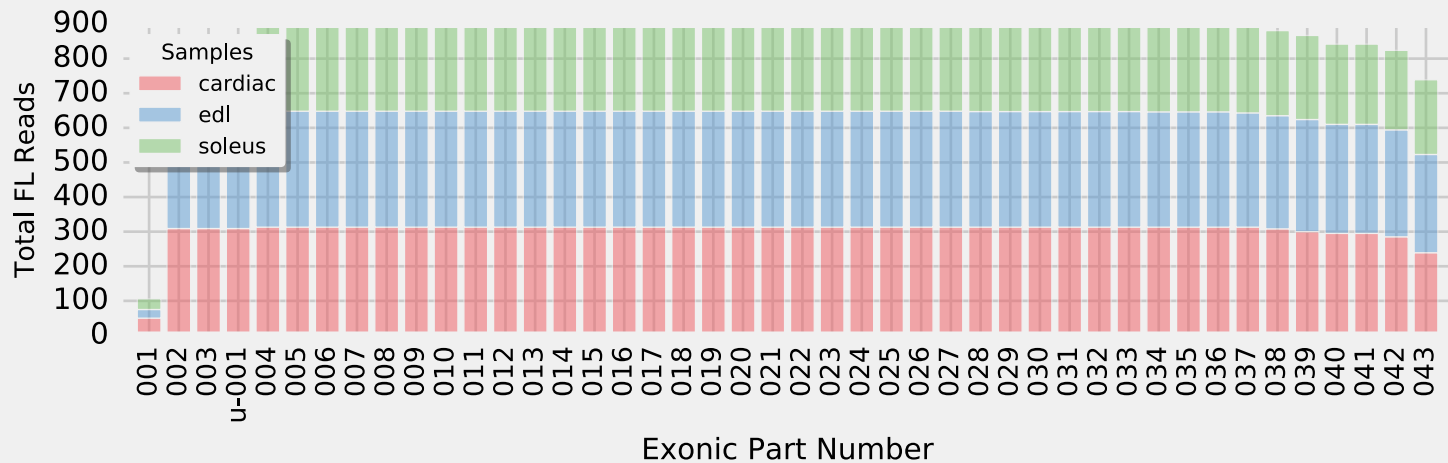

# Cluh

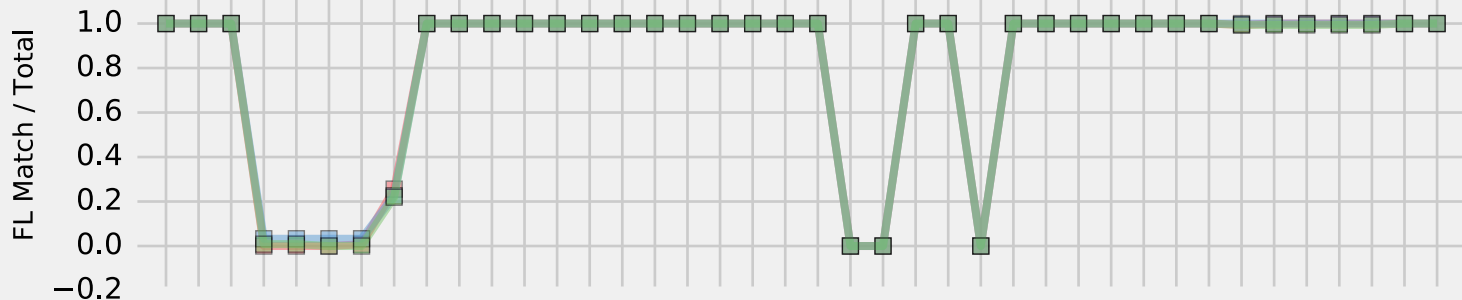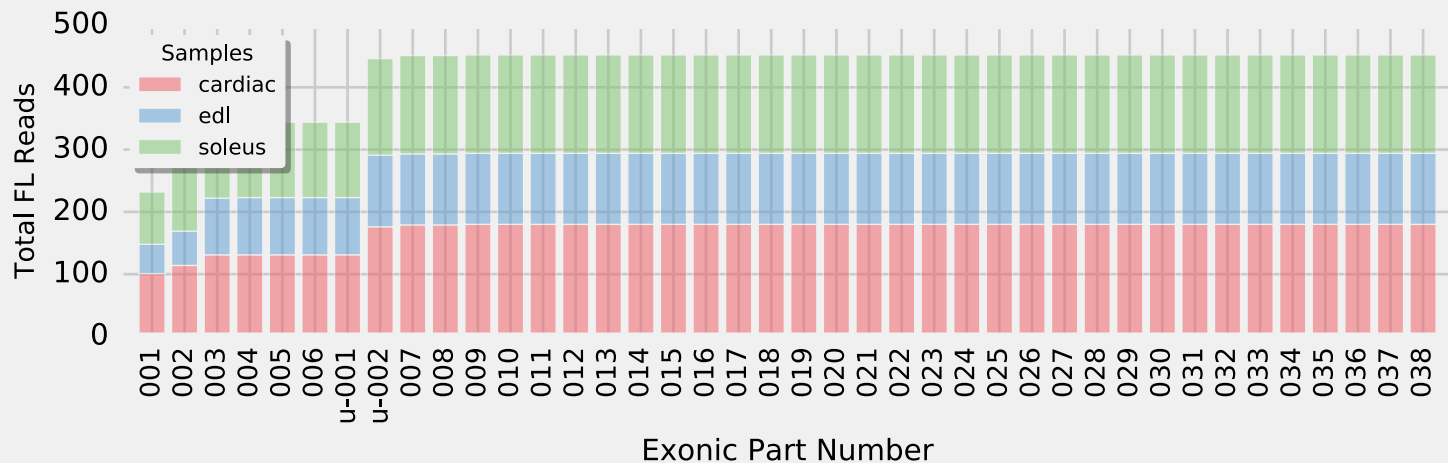

# Cmya5

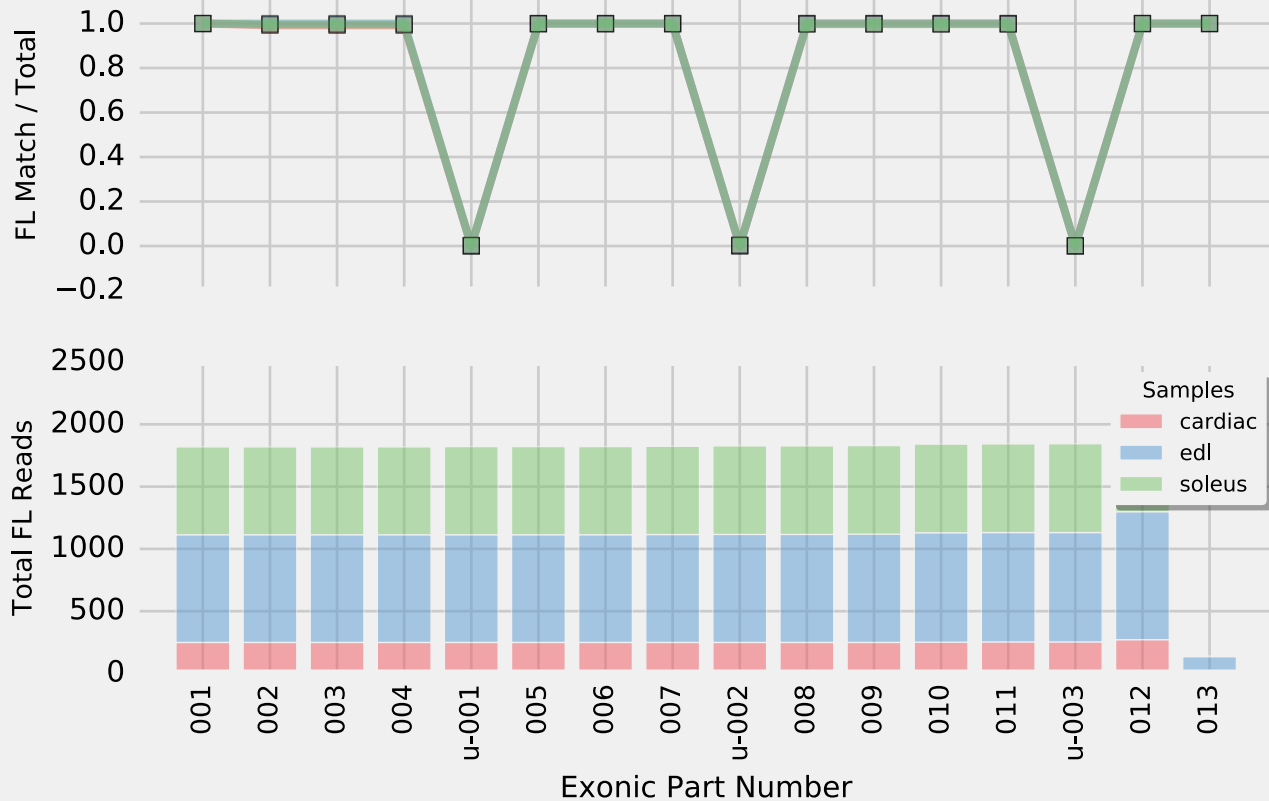

# Cnot1

FL Match / Total

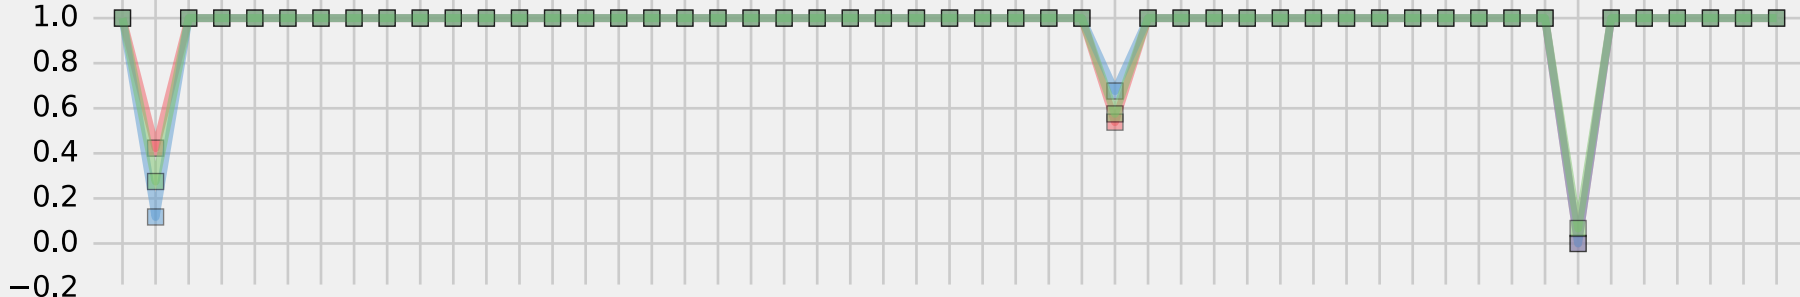

Total FL Reads

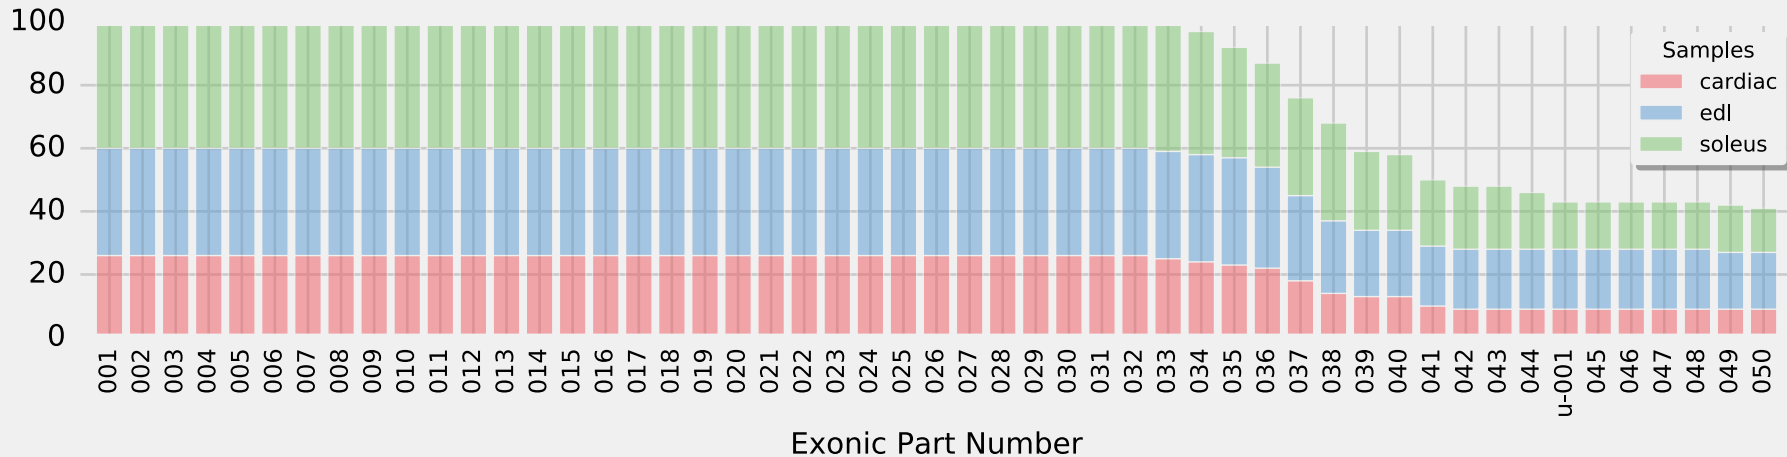



# Col4a1

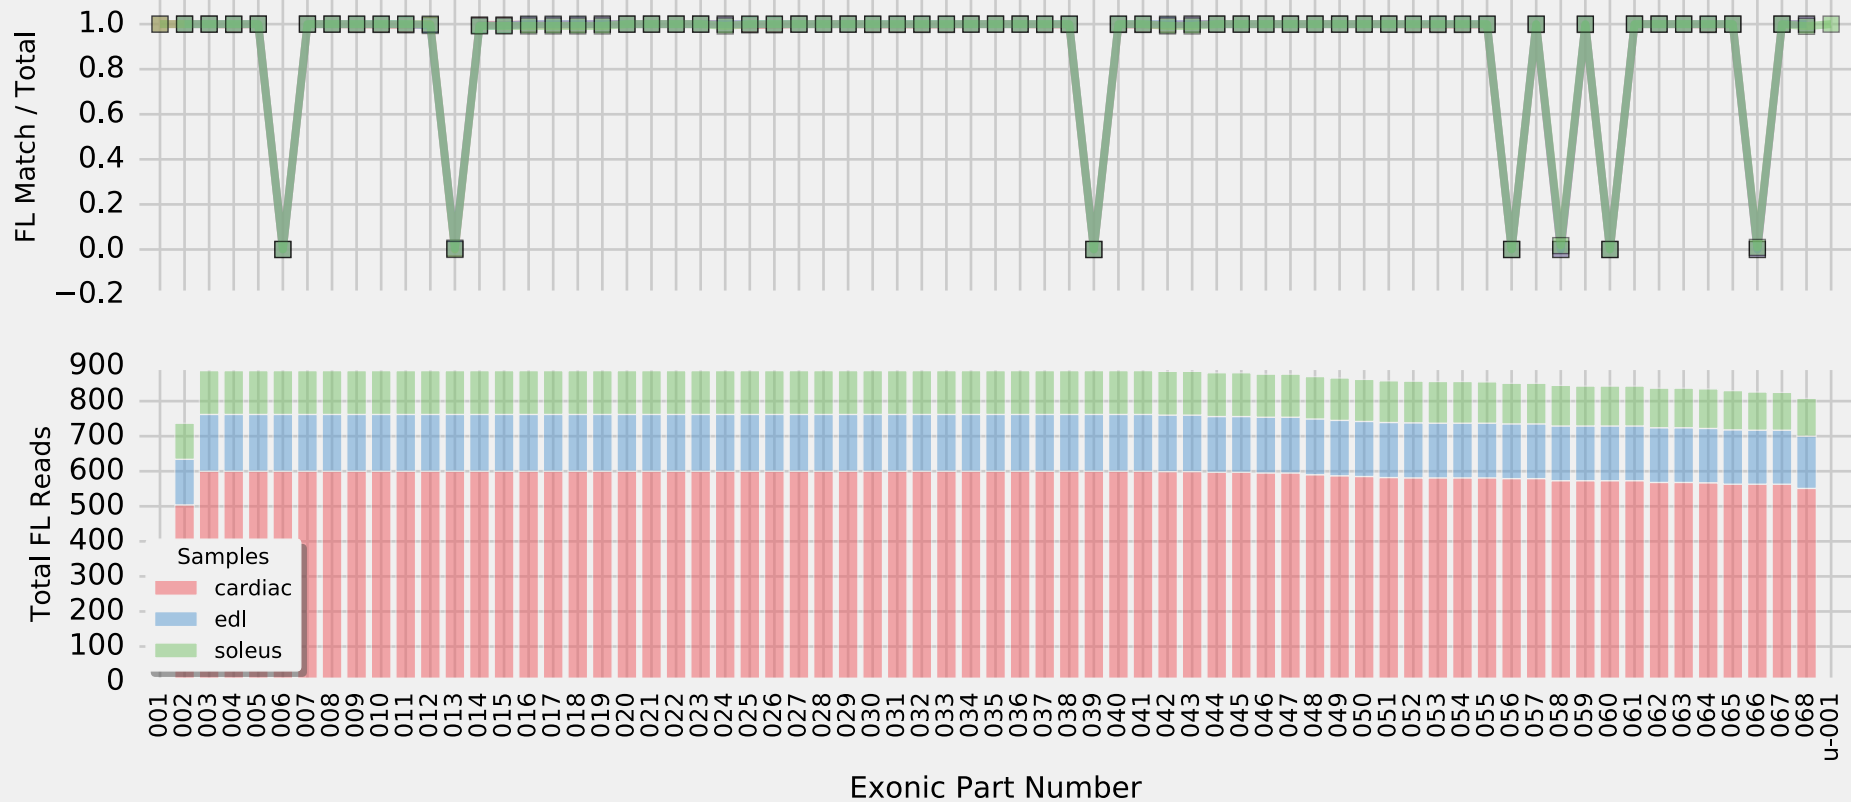

# Col4a2

FL Match / Total

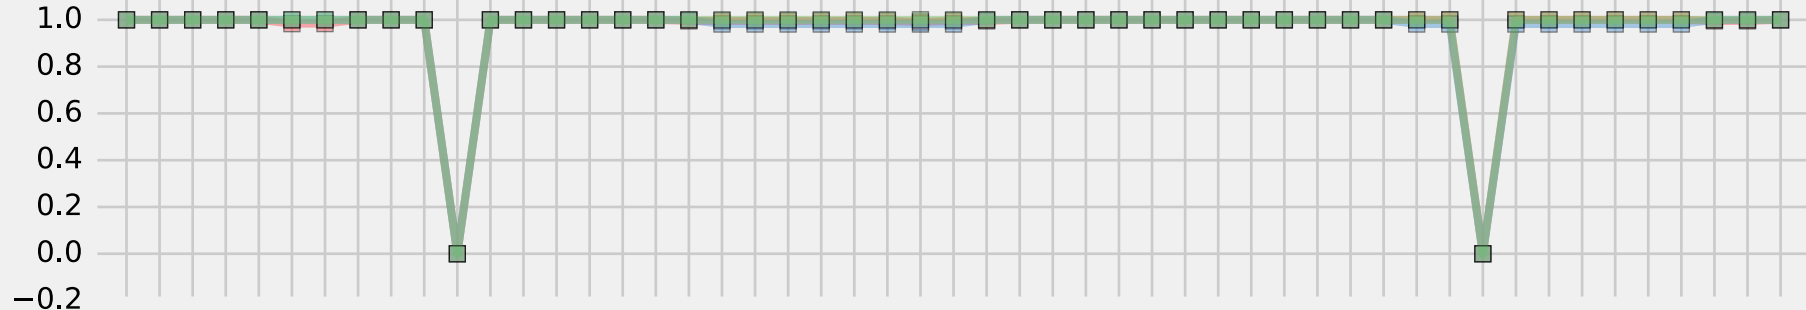

Total FL Reads

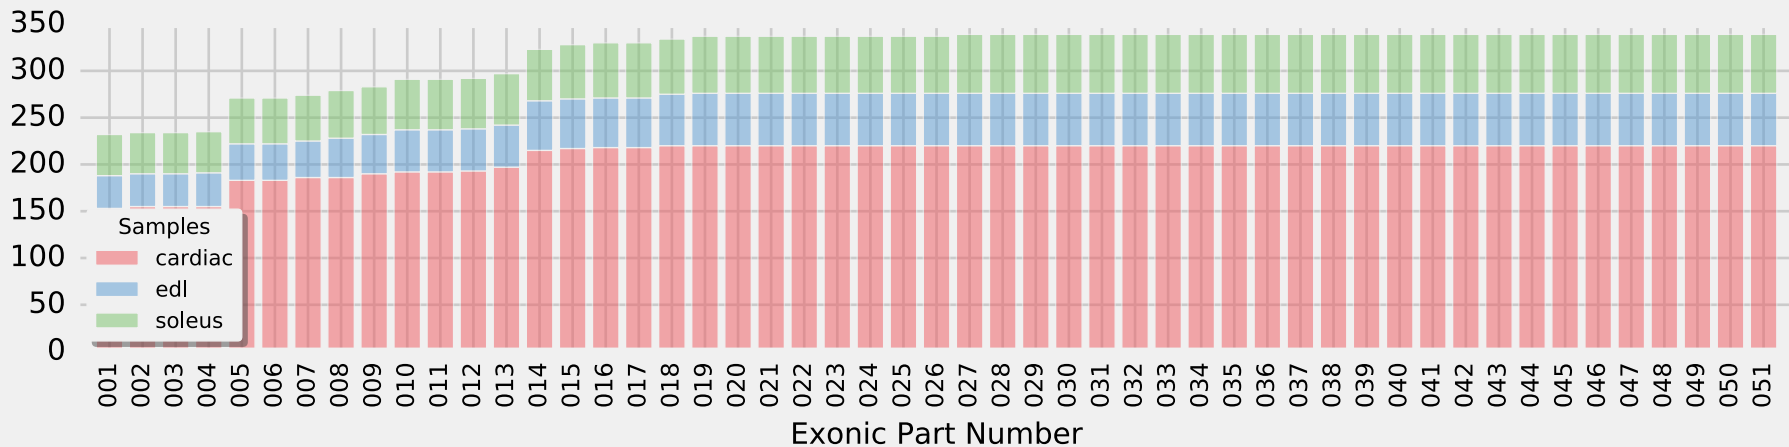

# Col4a5

FL Match / Total

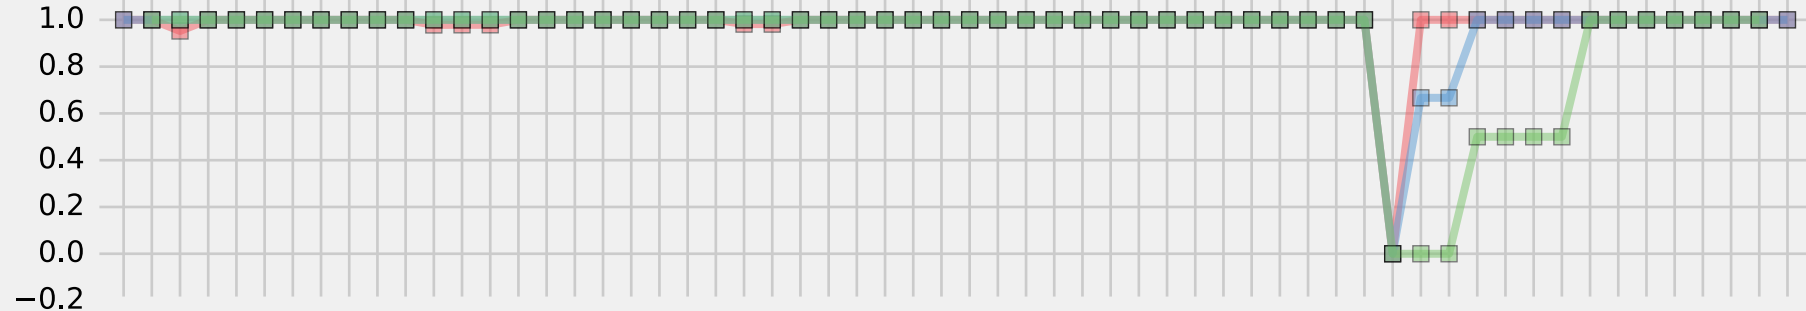

Total FL Reads

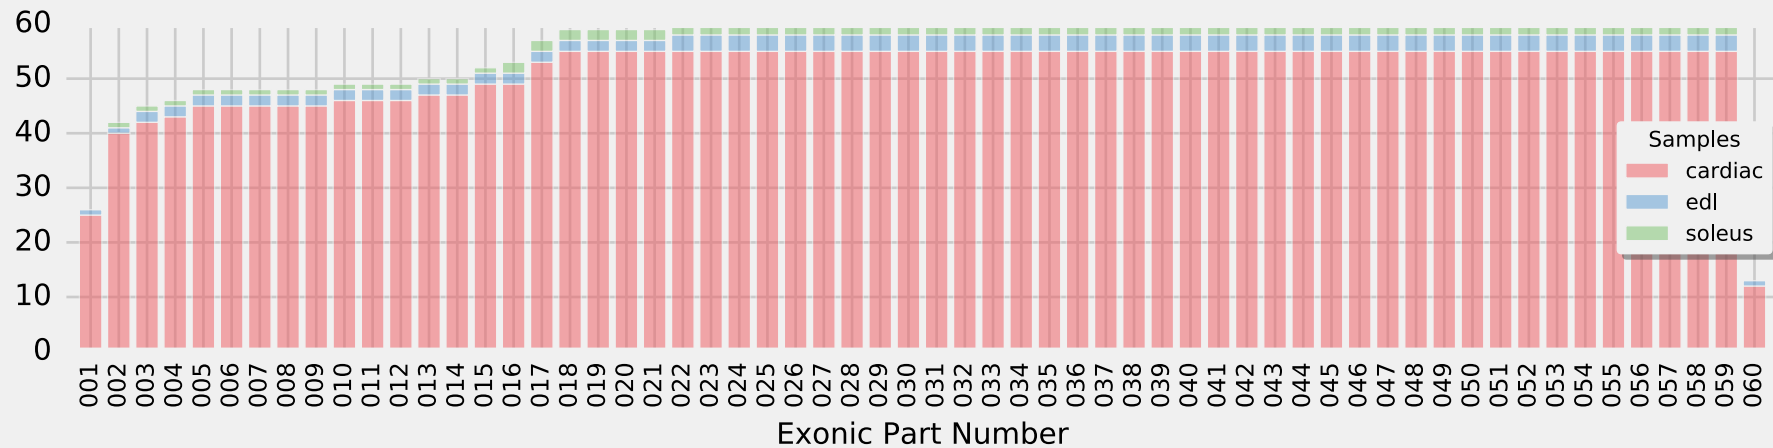

# Corin

FL Match / Total

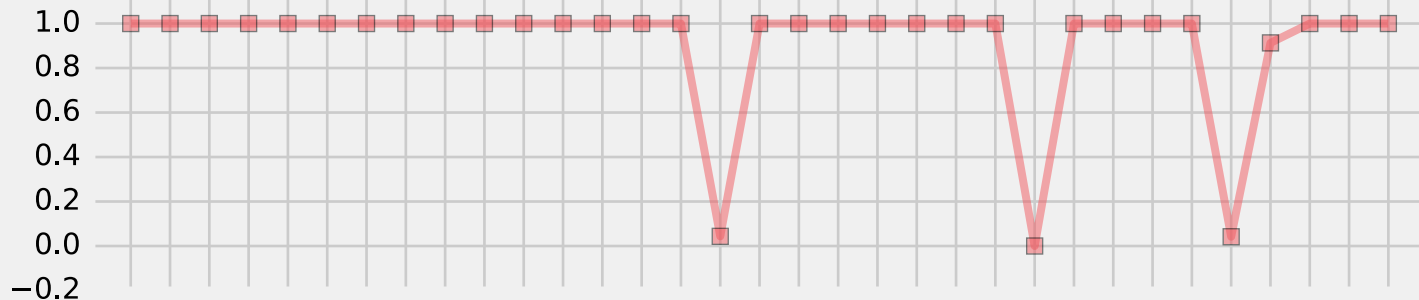

Total FL Reads

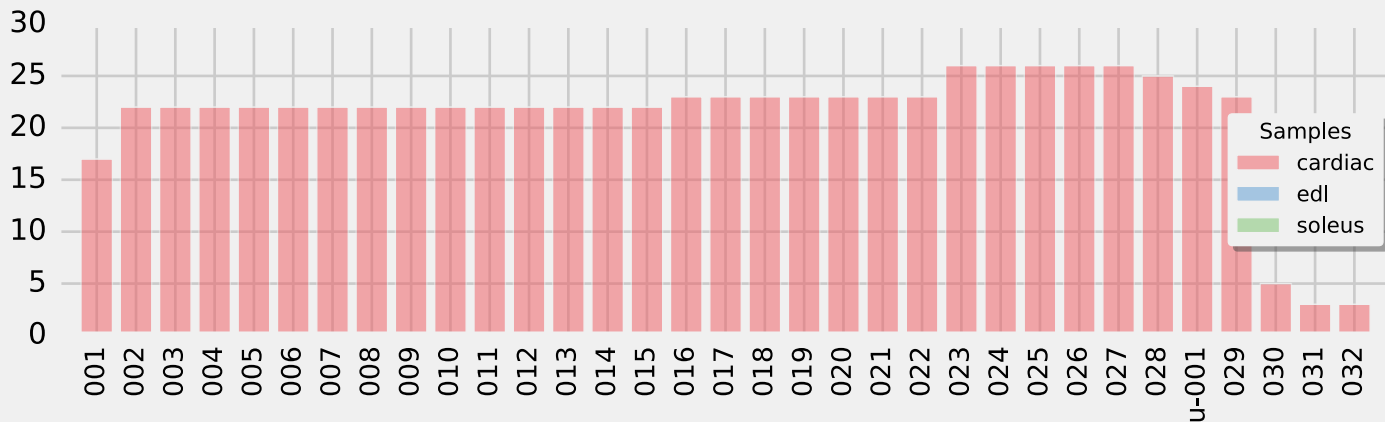

Exonic Part Number

Samples

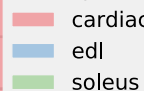

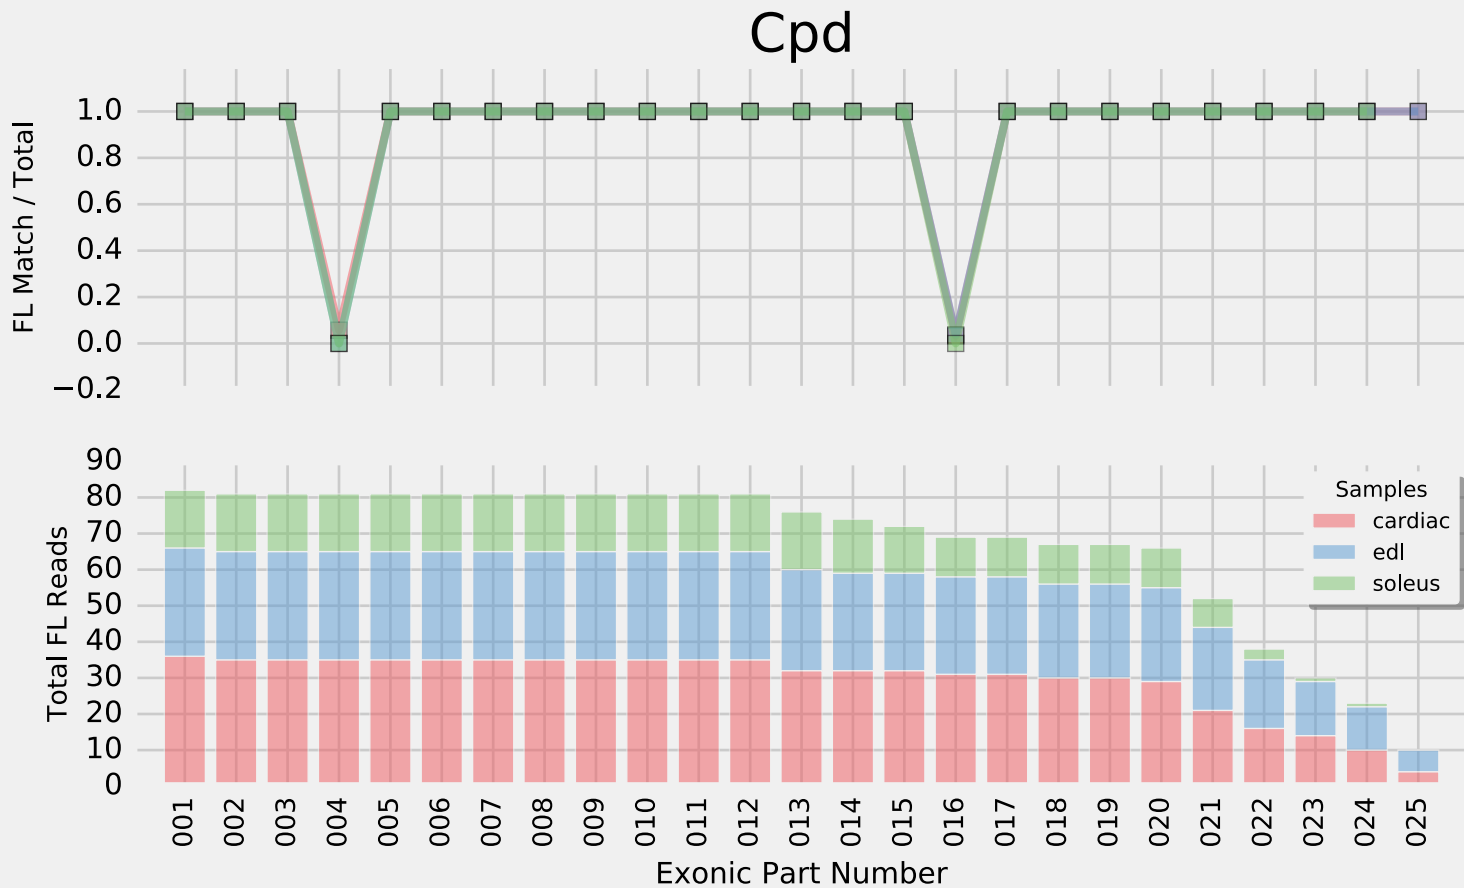

# Cpeb4

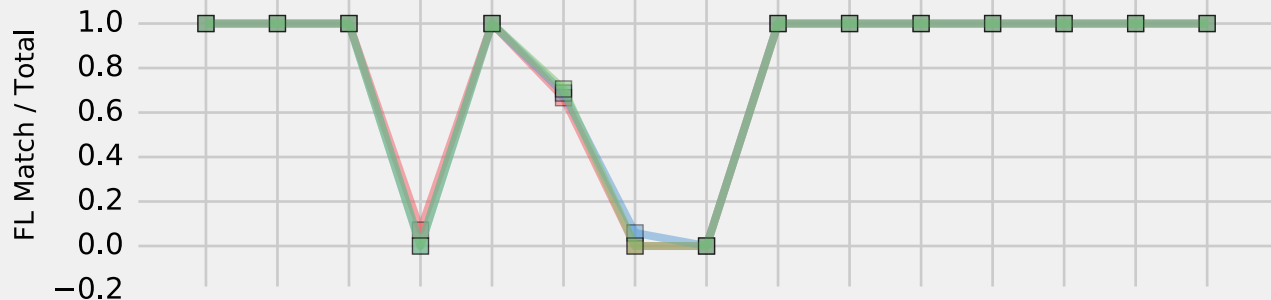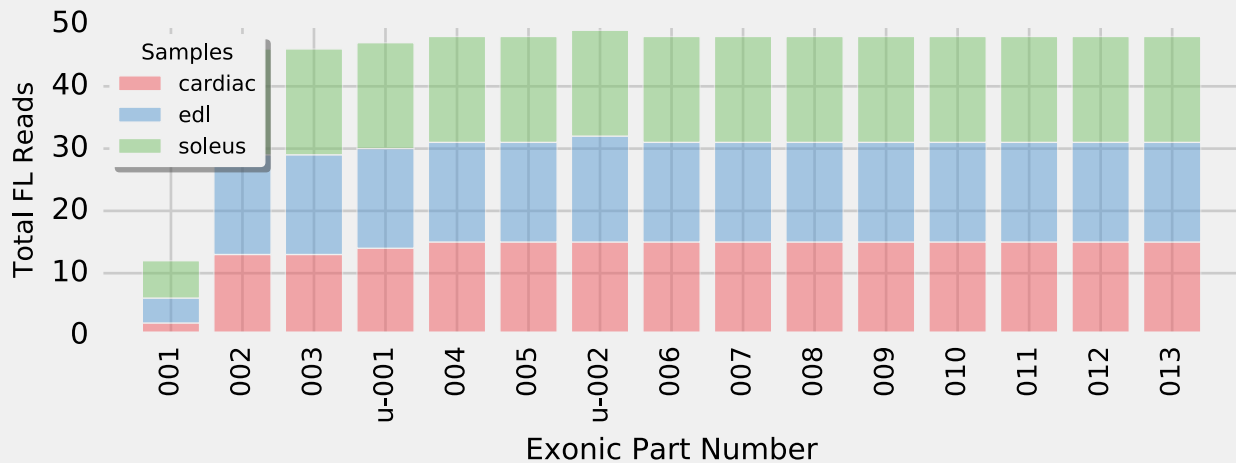

# Cped1

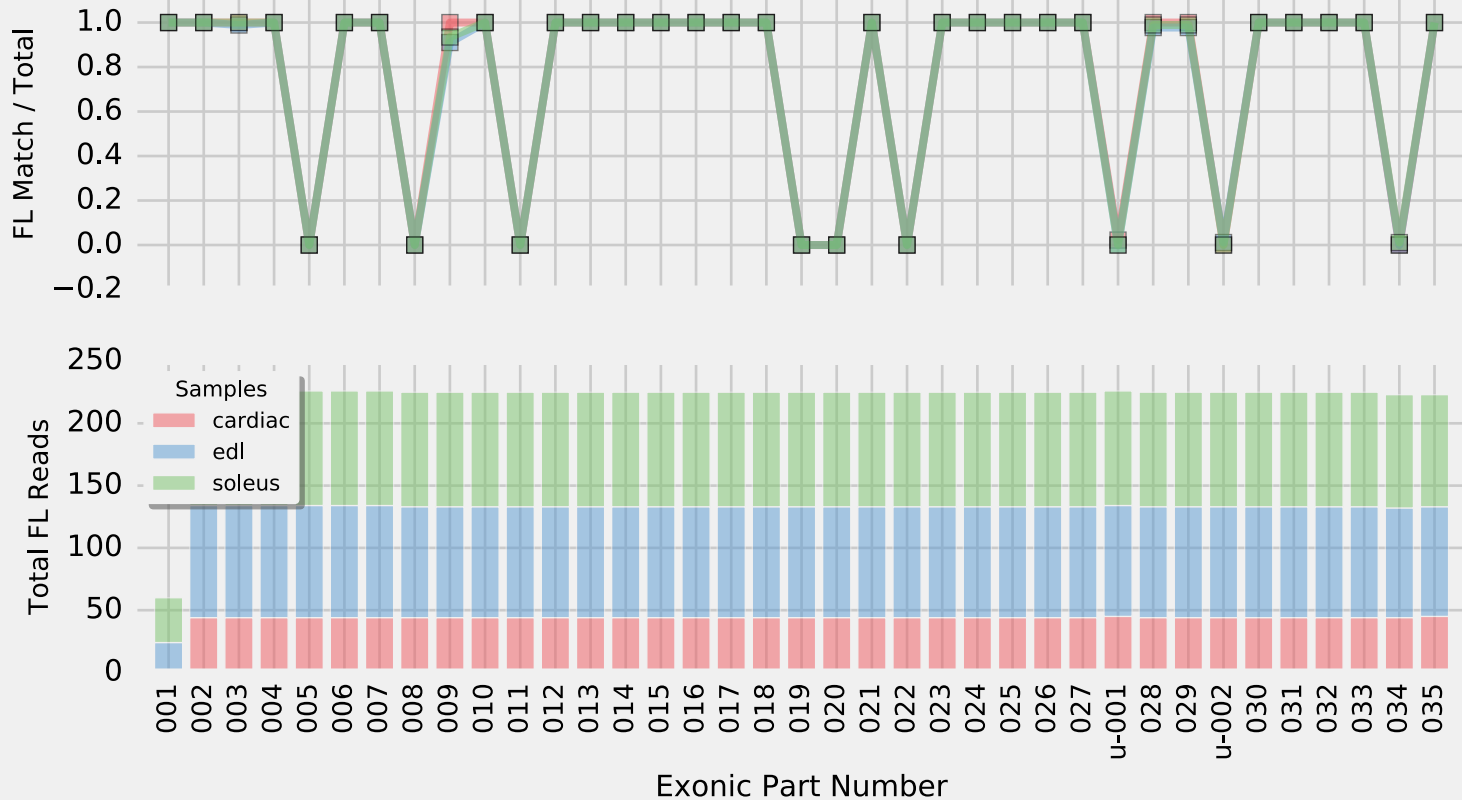

# Creb1

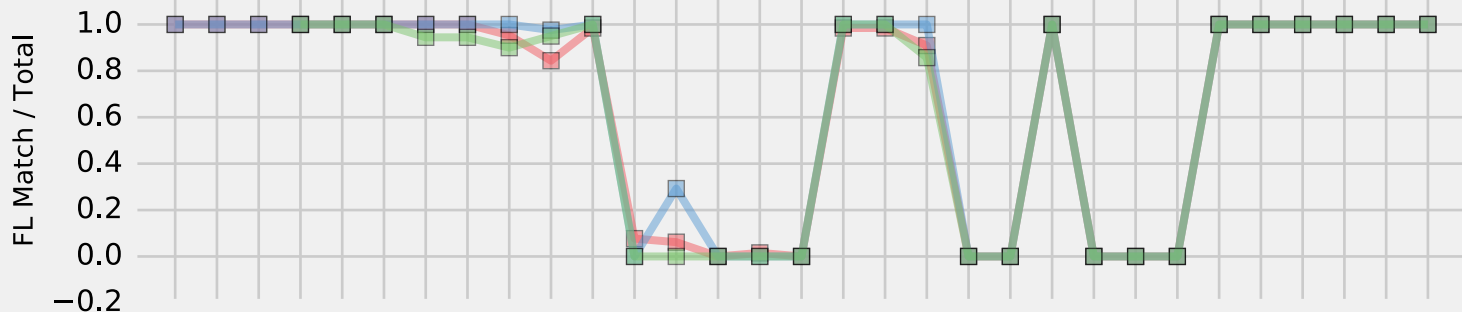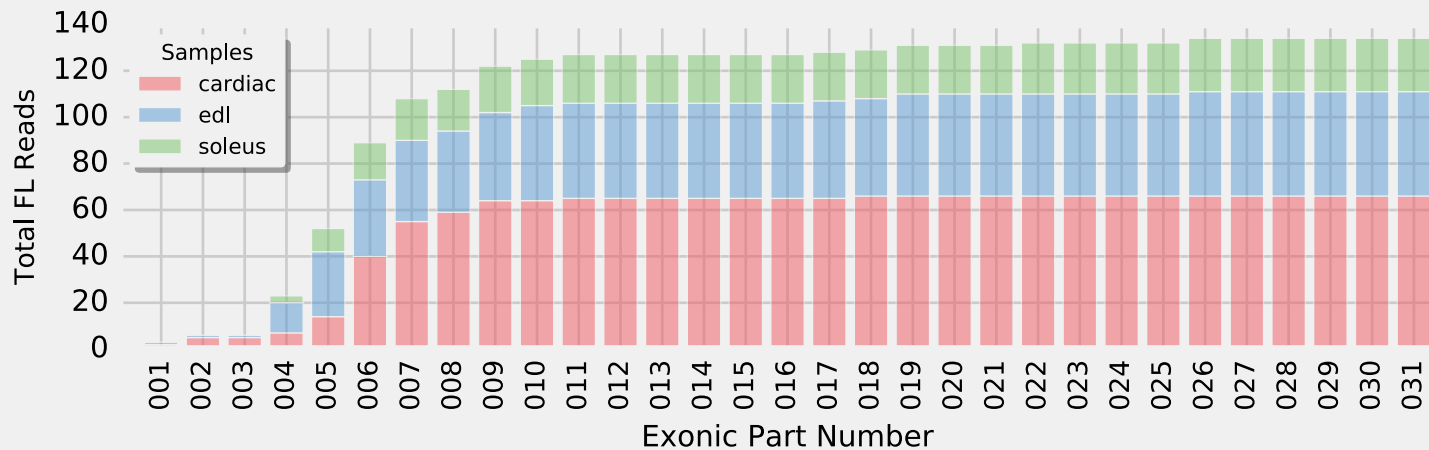



# Crybg3

FL Match / Total

1.0  
0.8  
0.6  
0.4  
0.2  
0.0  
-0.2

Total FL Reads

Samples  
cardiac  
edl  
soleus

001

002

003

004

005

006

007

008

009

010

011

012

013

014

015

016

017

018

019

020

021

022

023

024

025

Exonic Part Number

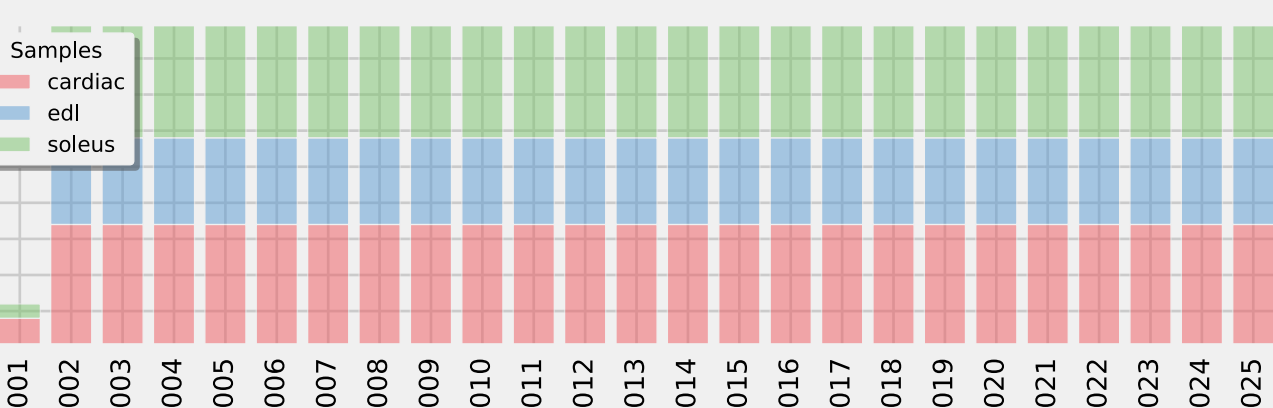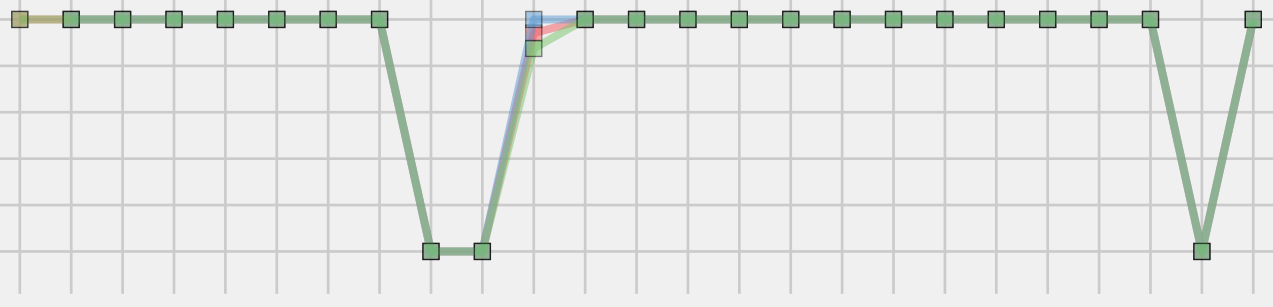

# CuI5

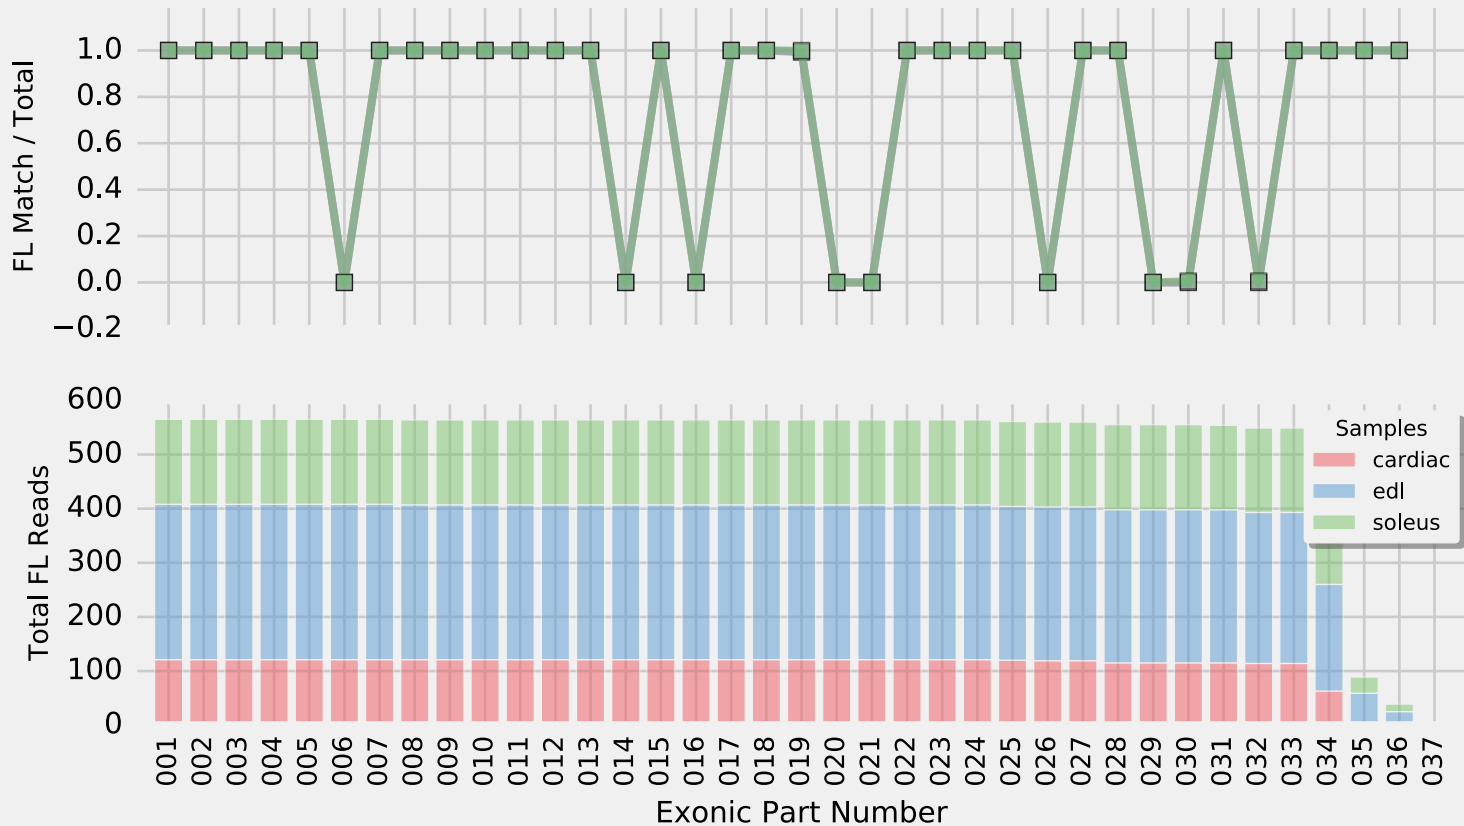

# CuI7

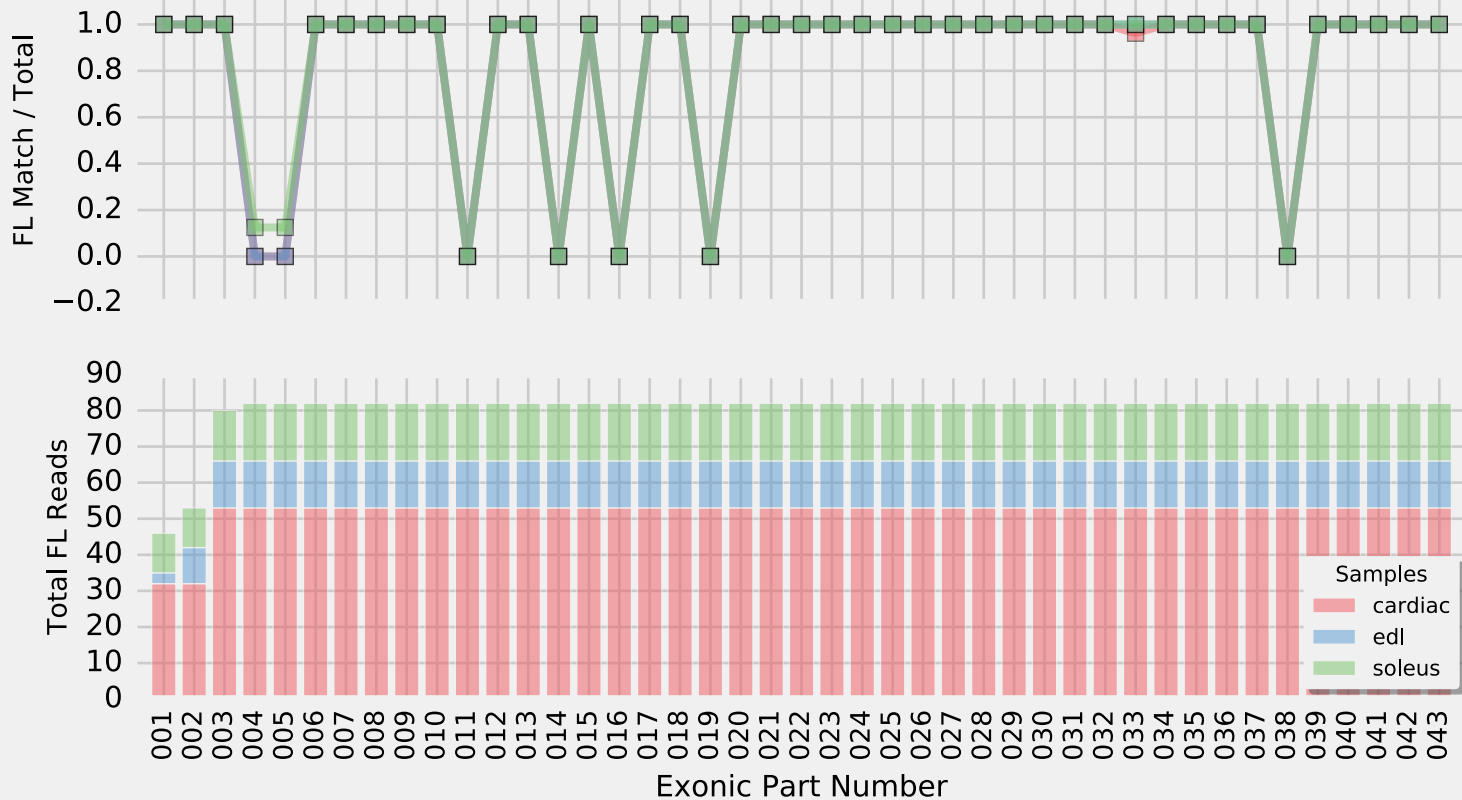

# CuI9

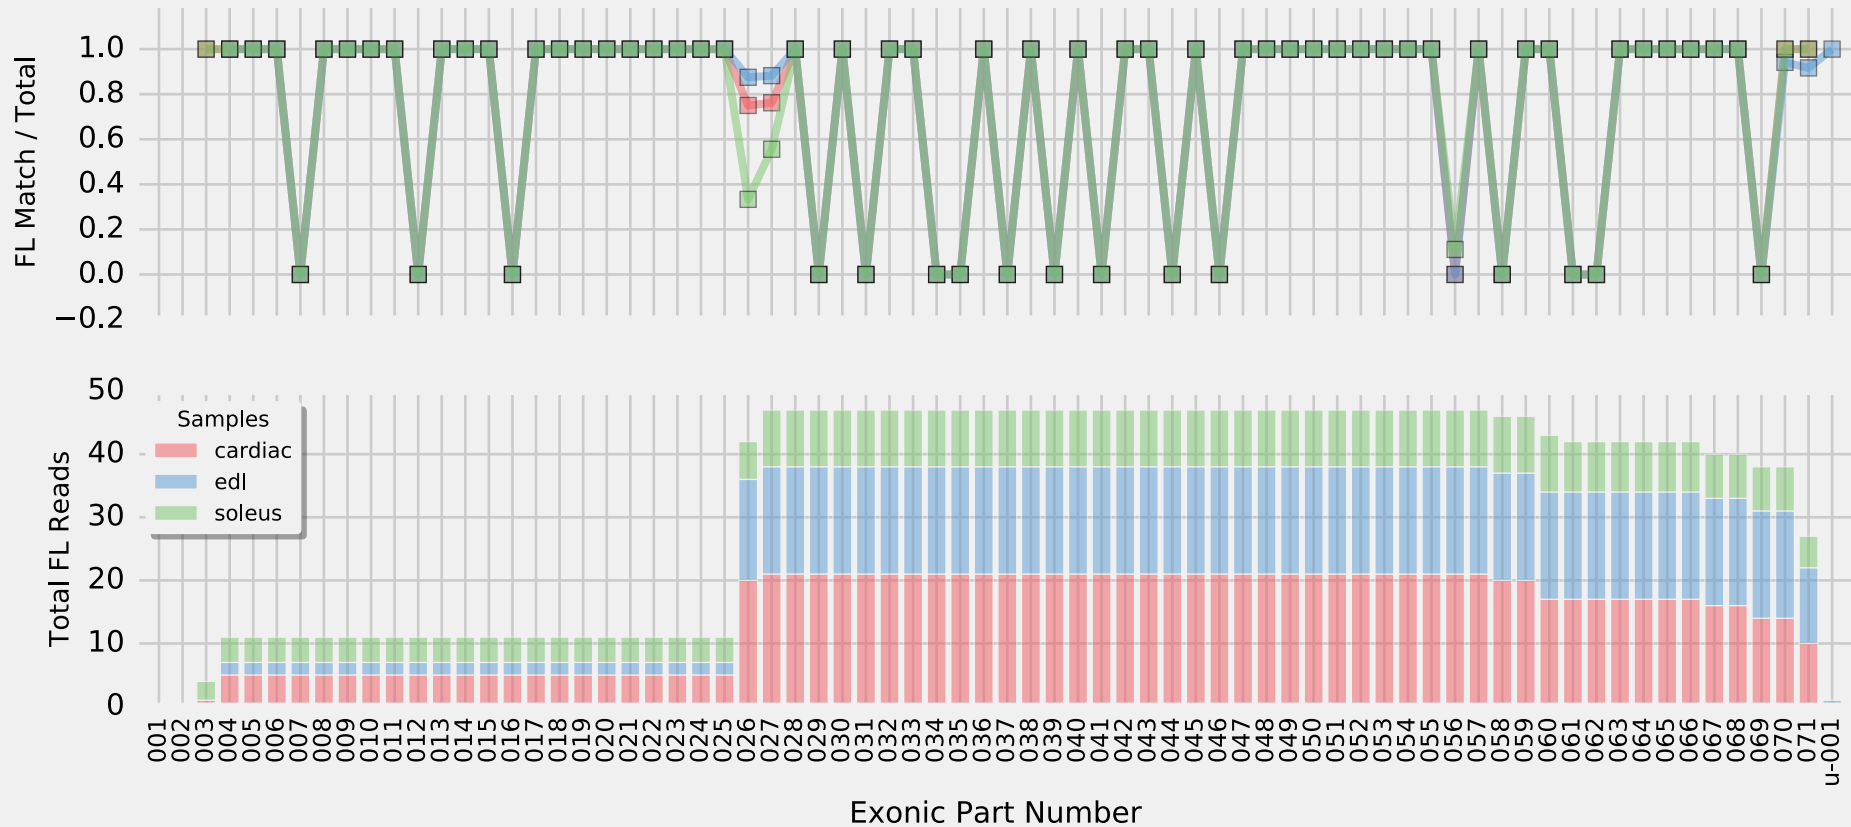

# Cxadr

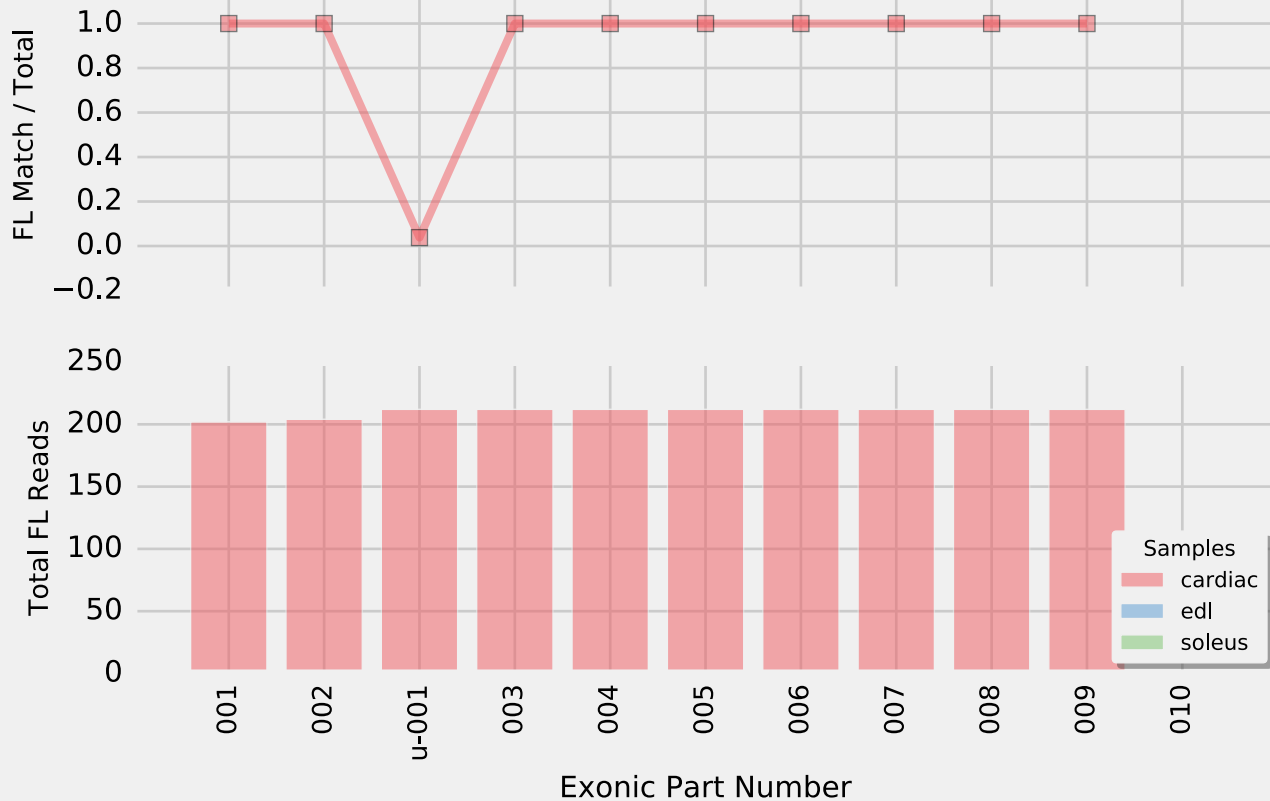

# Cxcl12

FL Match / Total

1.0  
0.8  
0.6  
0.4  
0.2  
0.0  
-0.2

Total FL Reads

Samples

cardiac  
edl  
soleus

300  
250  
200  
150  
100  
50  
0

001 002 003 004 005 006 007 008 009 010 011

Exonic Part Number

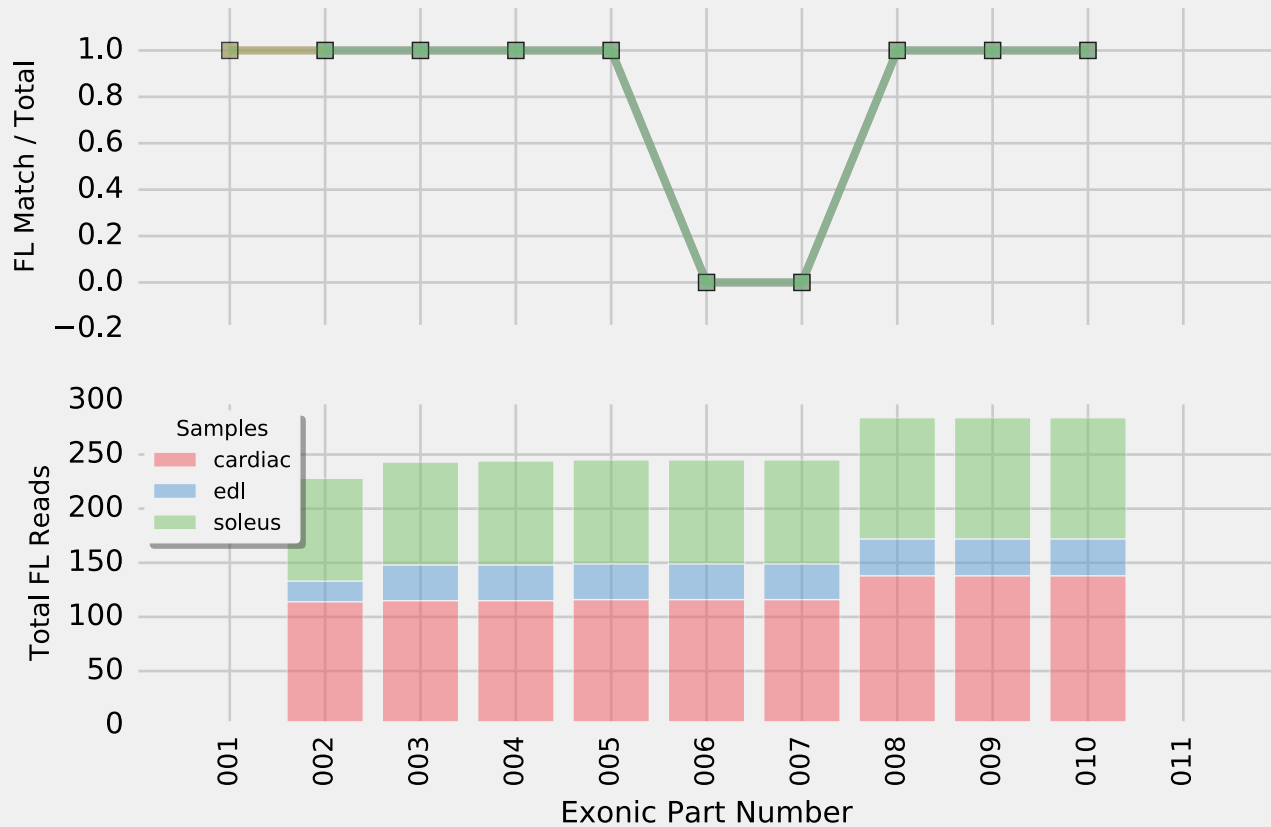

# Cytip2

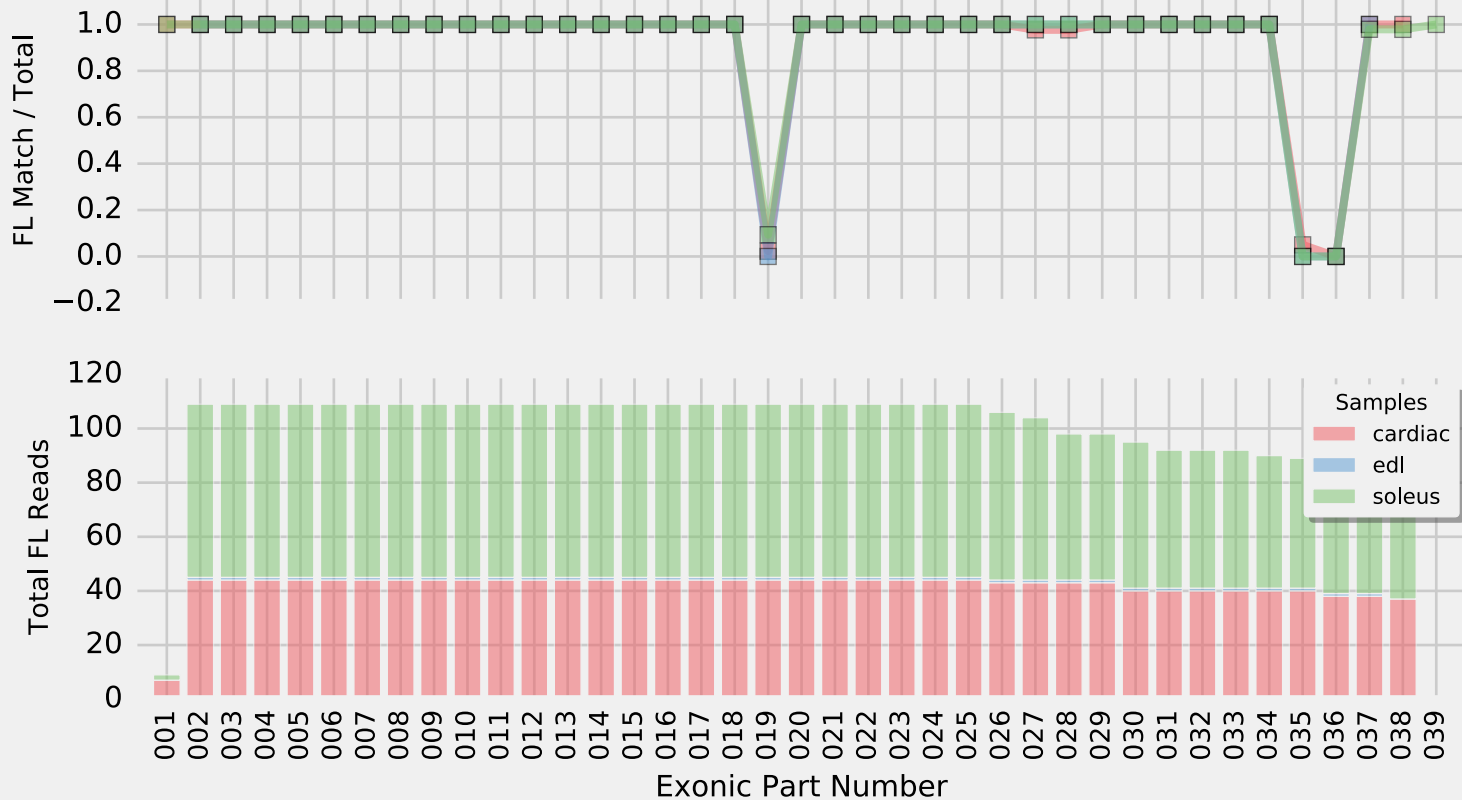

# Cyld

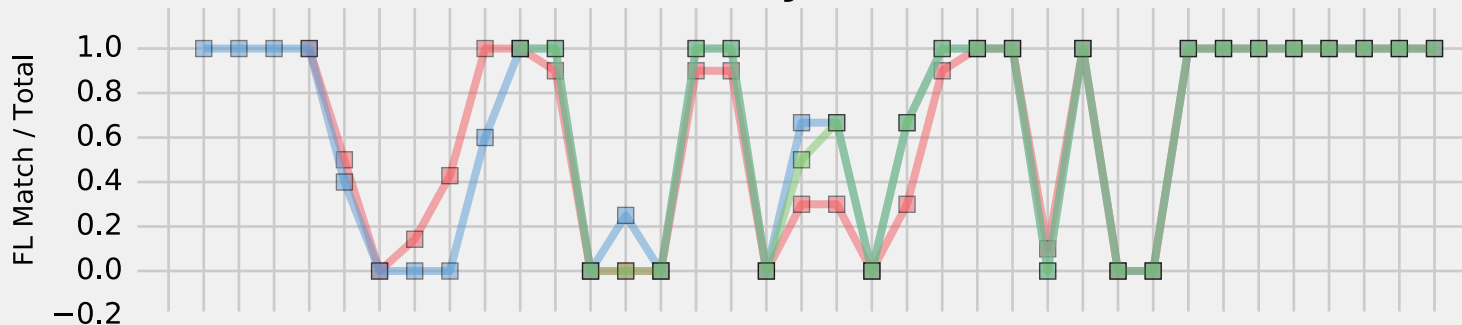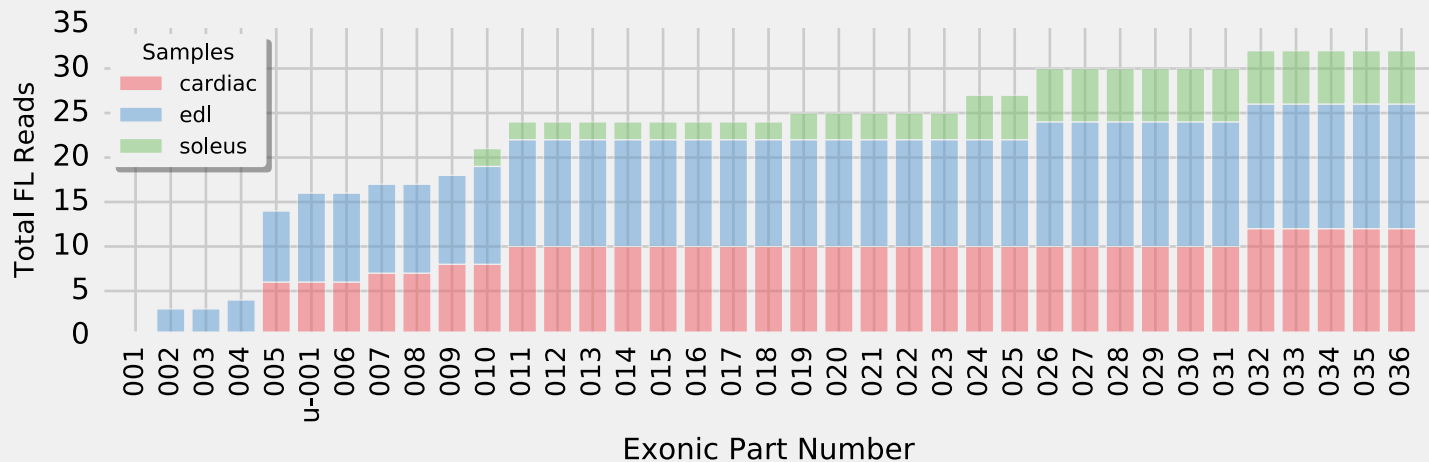



# Daam1

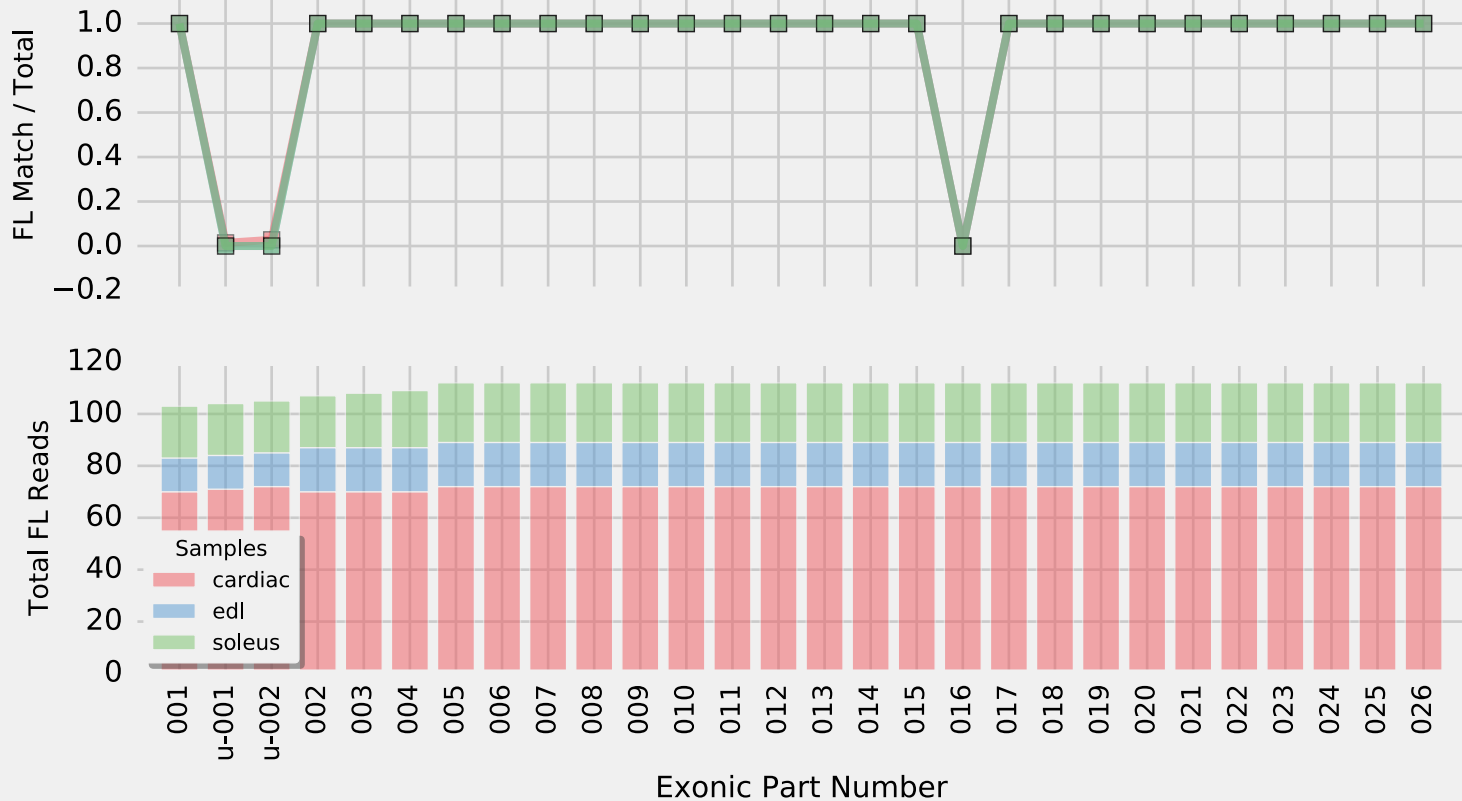

# Dab2ip

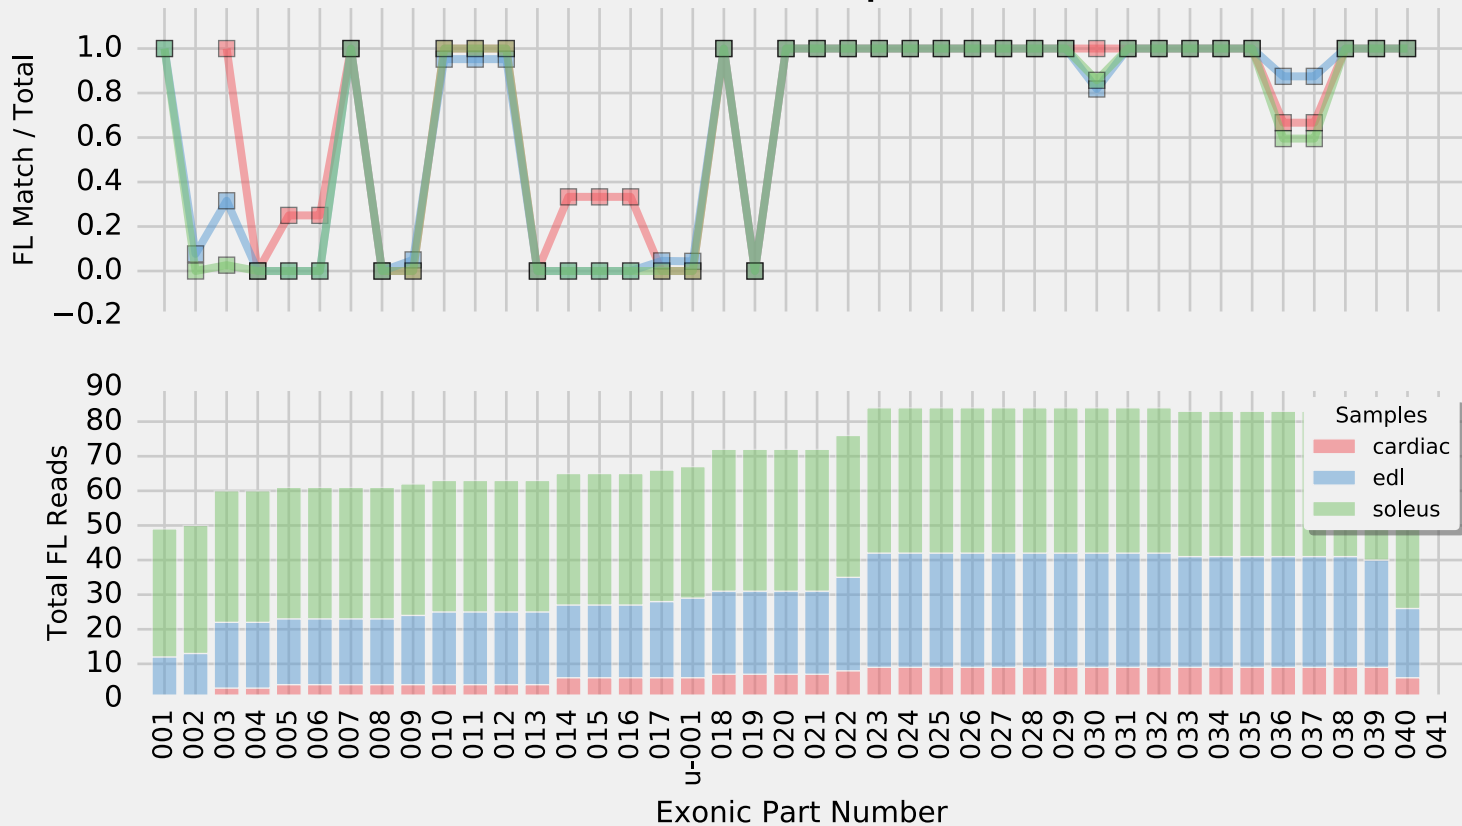

# Dag1

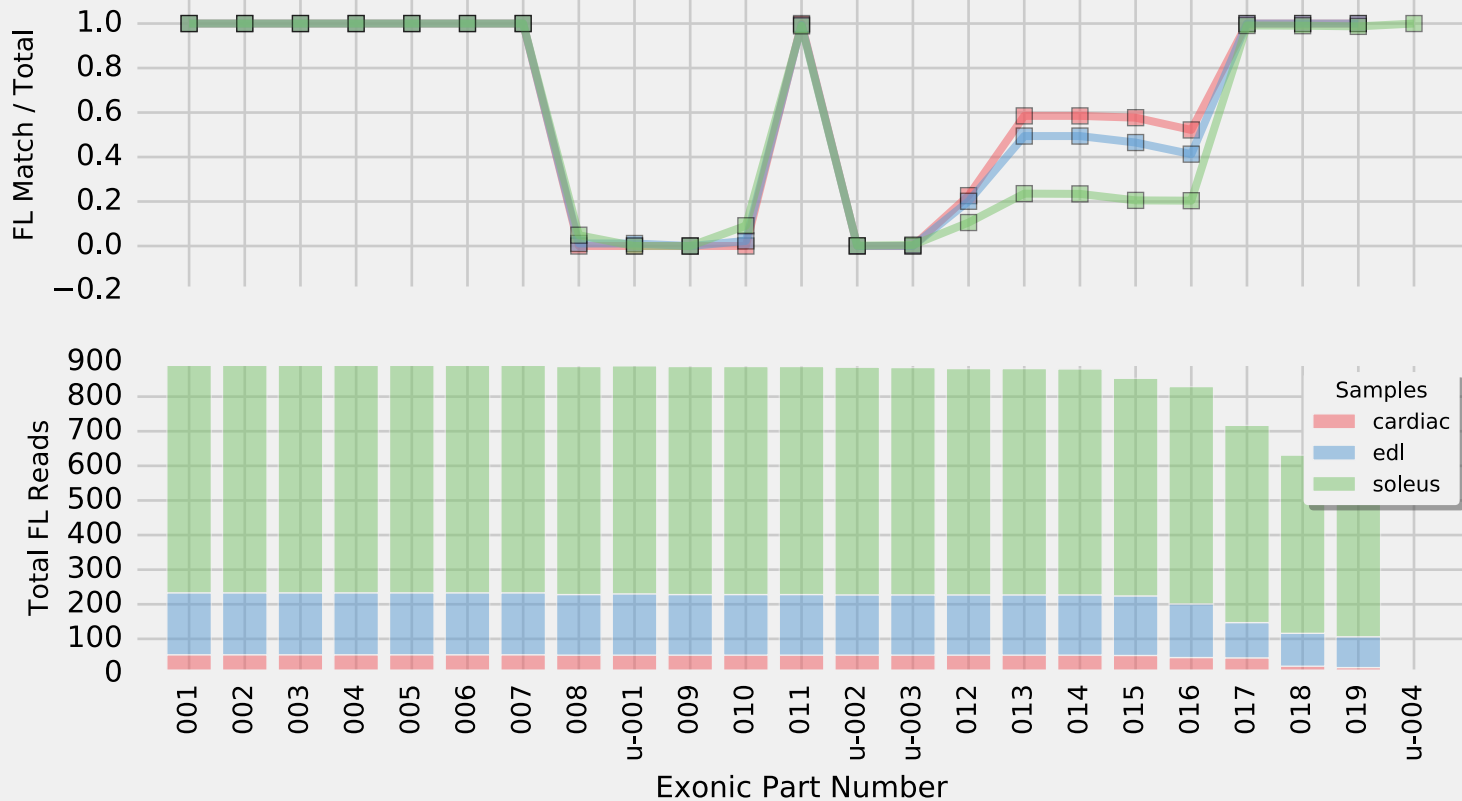

# Dapk2

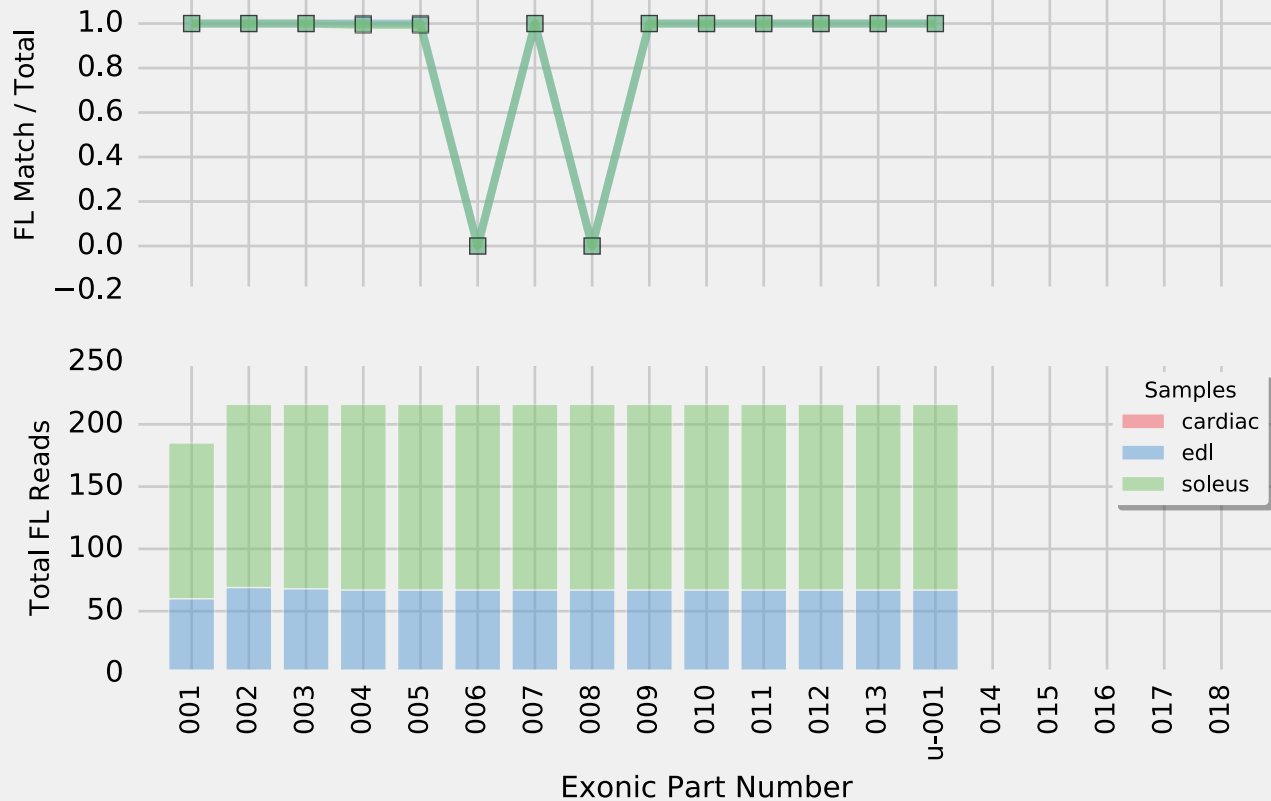

# Dcaf7

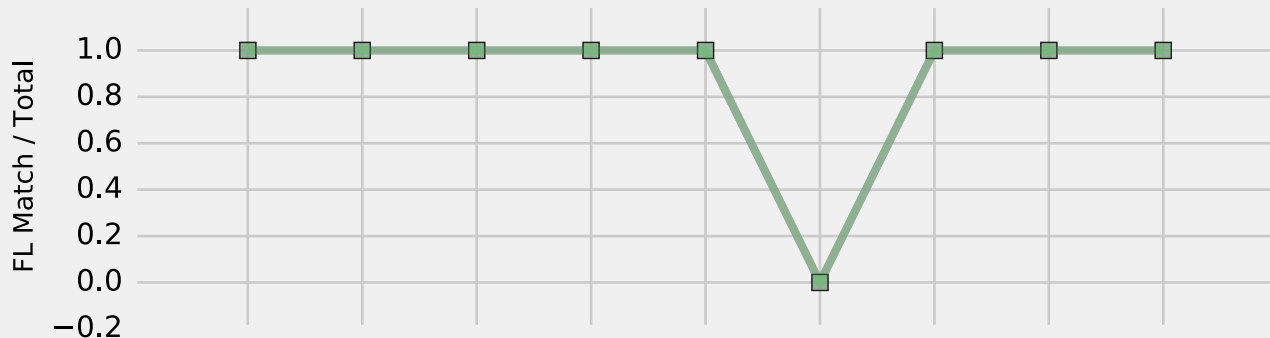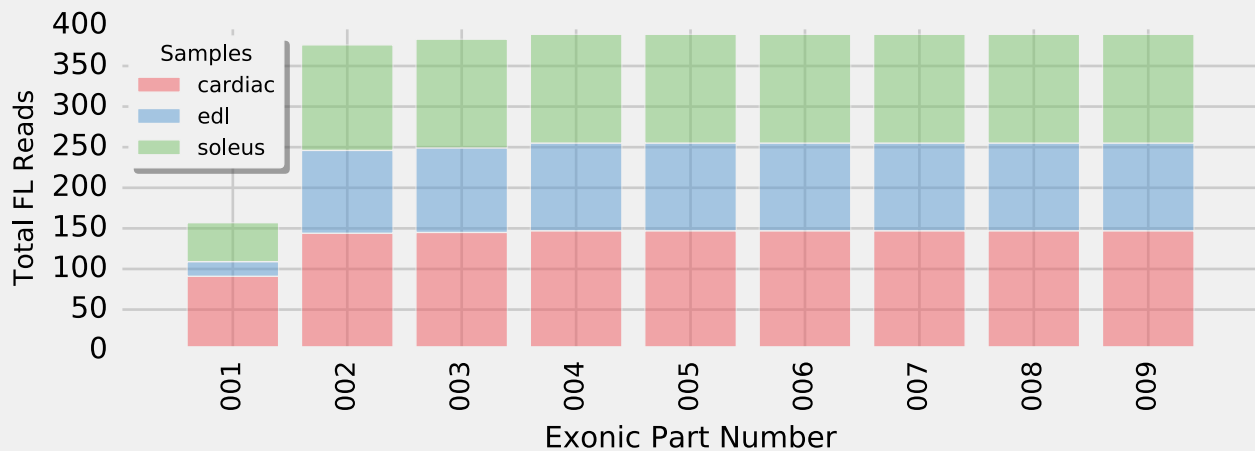

# Dcp1a

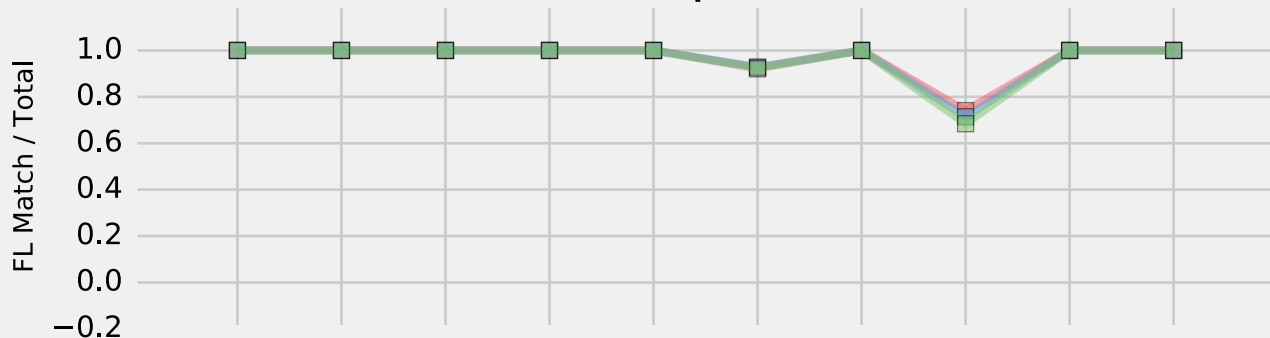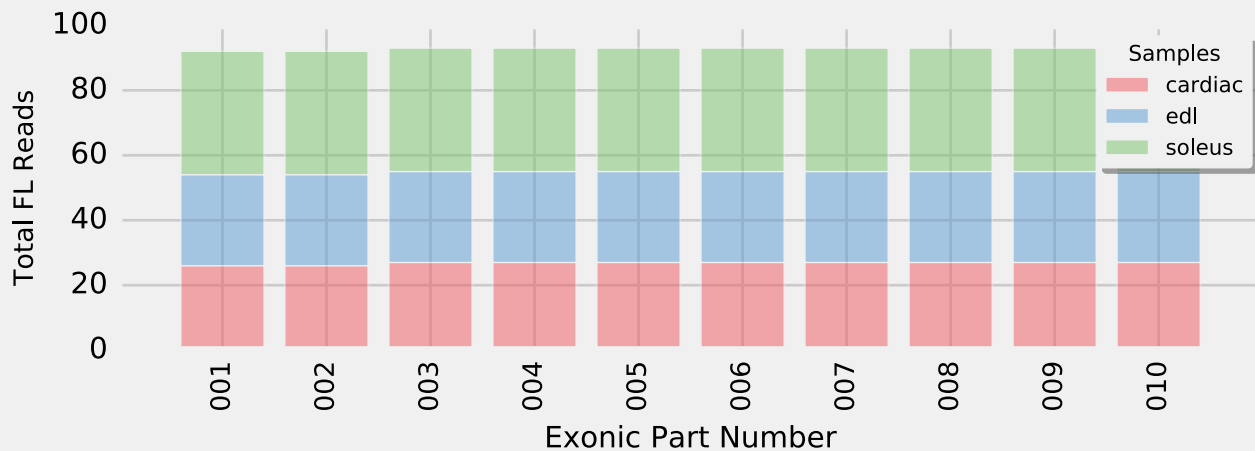

# Dcun1d3

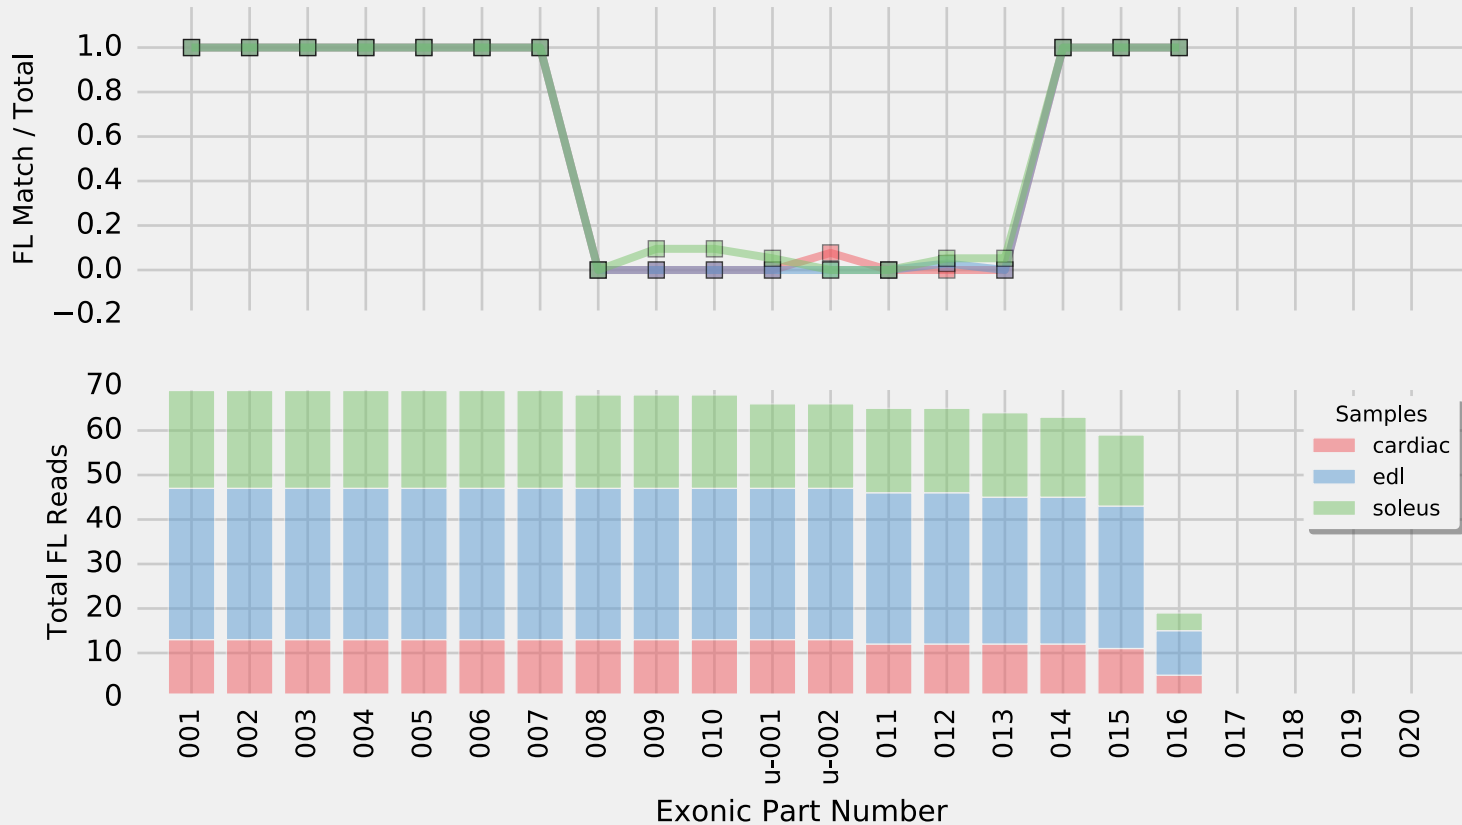

# Ddx46

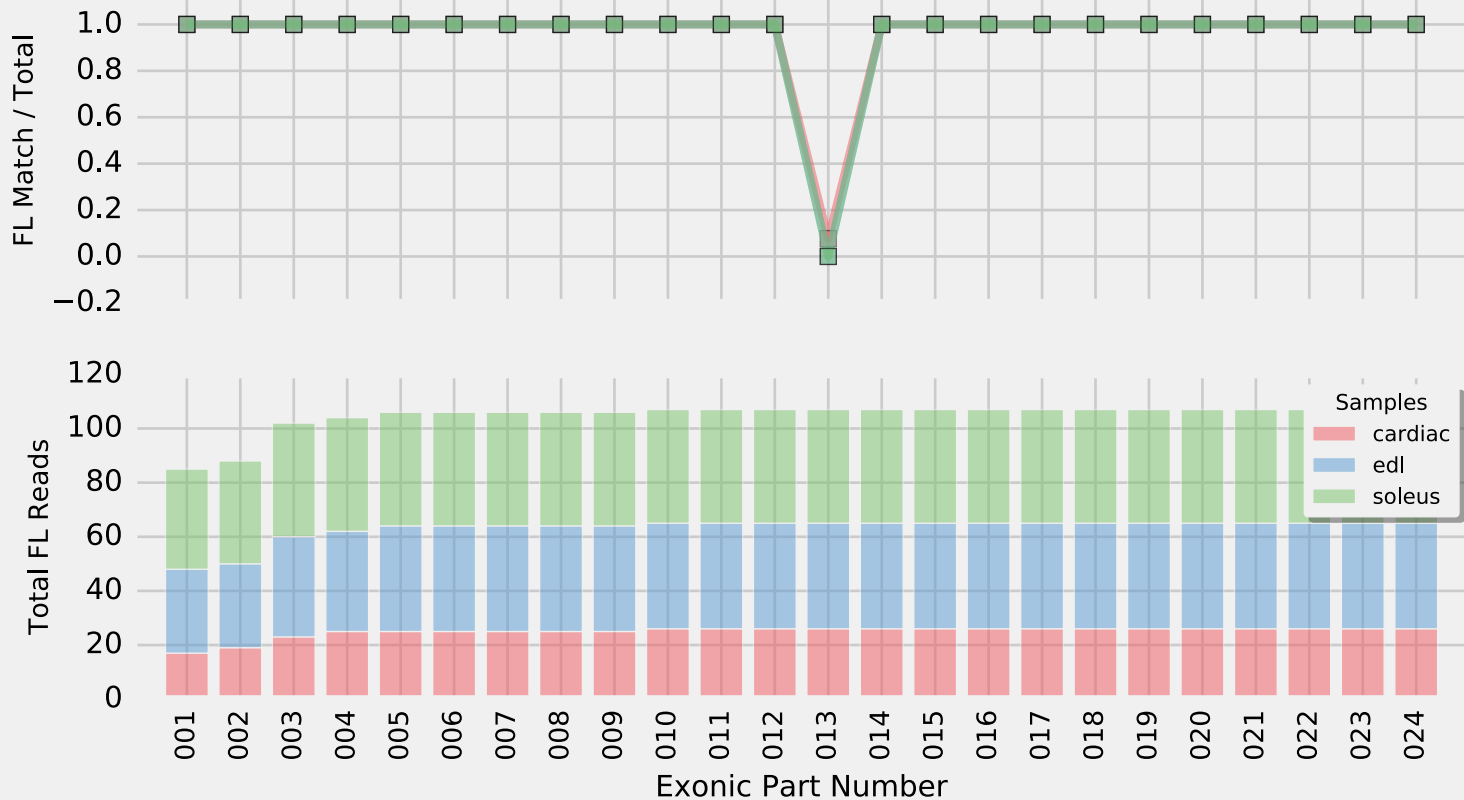



# Dennd1b

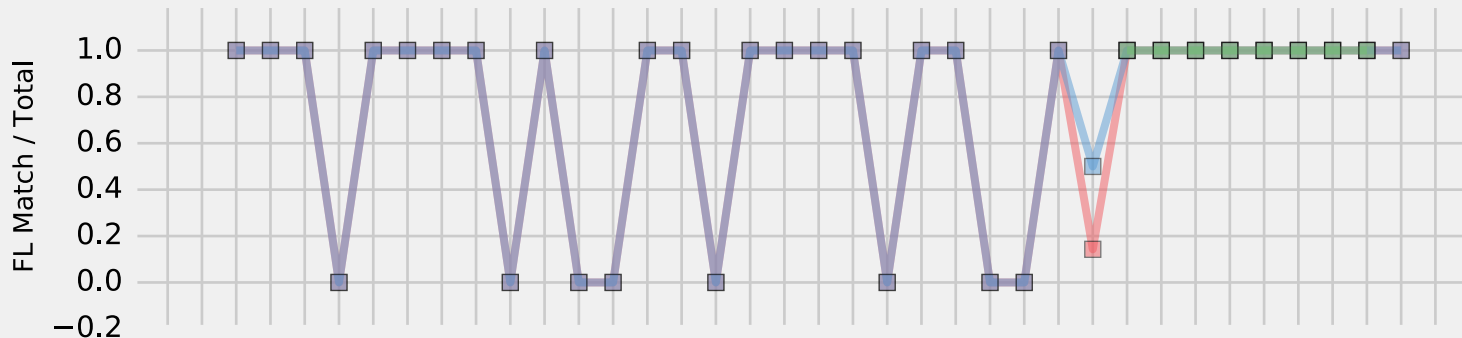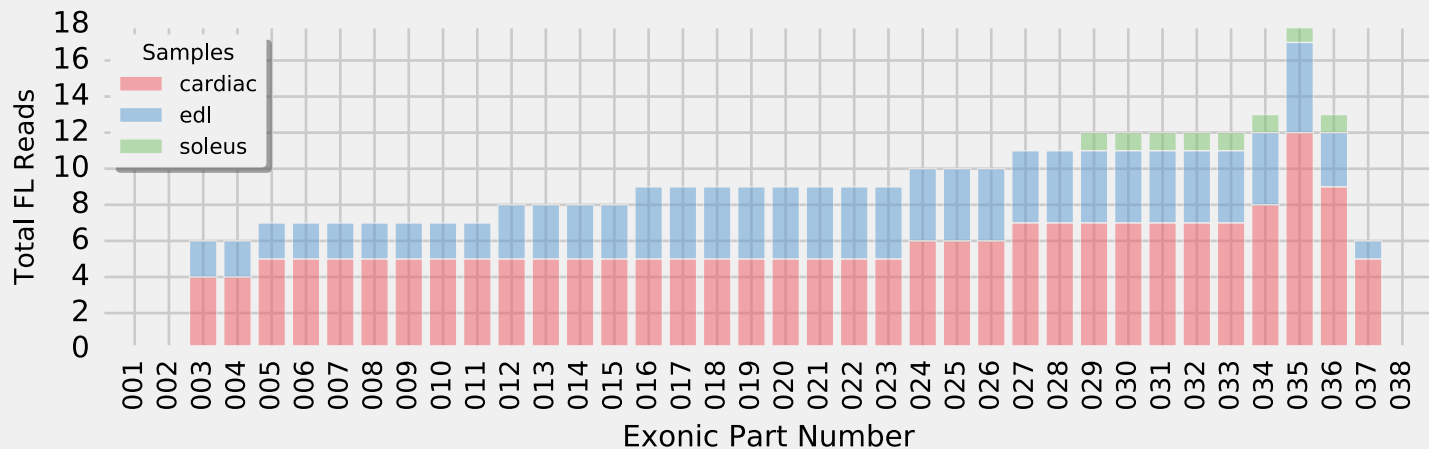

# Dennd4b

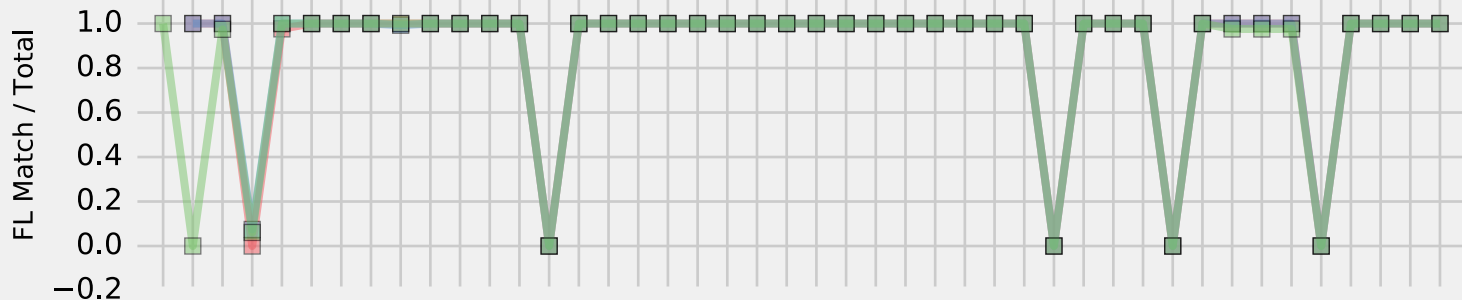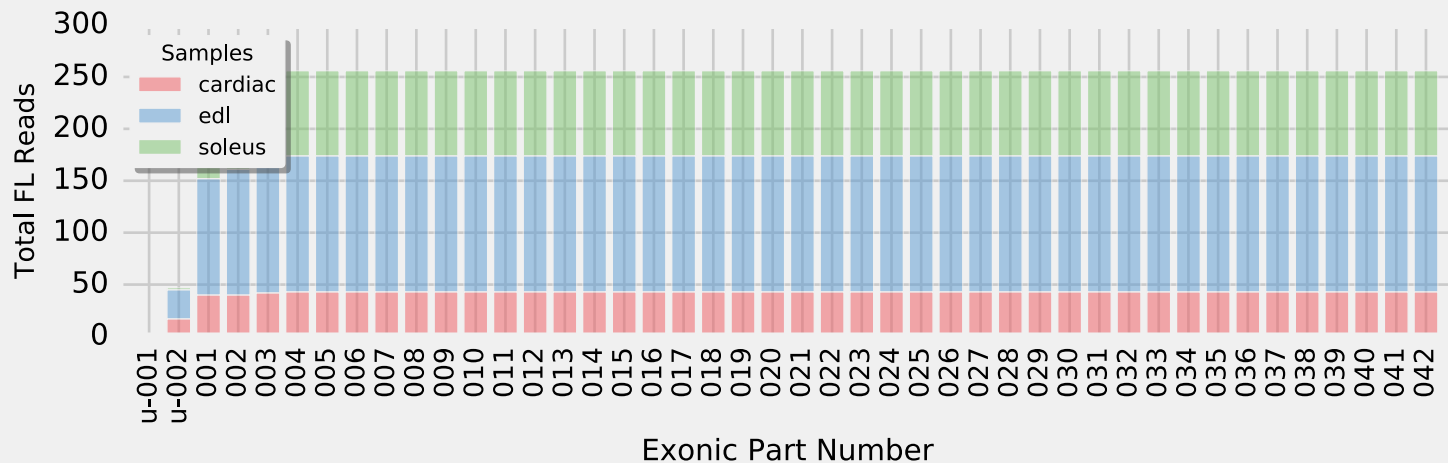

# Dennd4c

FL Match / Total

1.0  
0.8  
0.6  
0.4  
0.2  
0.0  
-0.2

Total FL Reads

Samples  
cardiac  
edl  
soleus

001 002 003 004 005 006 007 008 009 010 011 012 013 014 015 016 017 018 019 020 021 022 023 024 025 026 027 028 029 030 031 032 033 034 035 036 037 038

Exonic Part Number

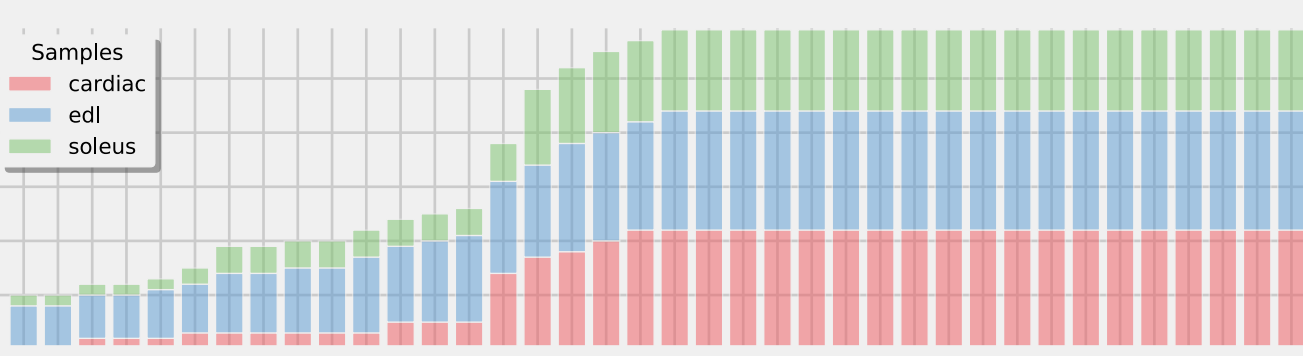

# Depdc5

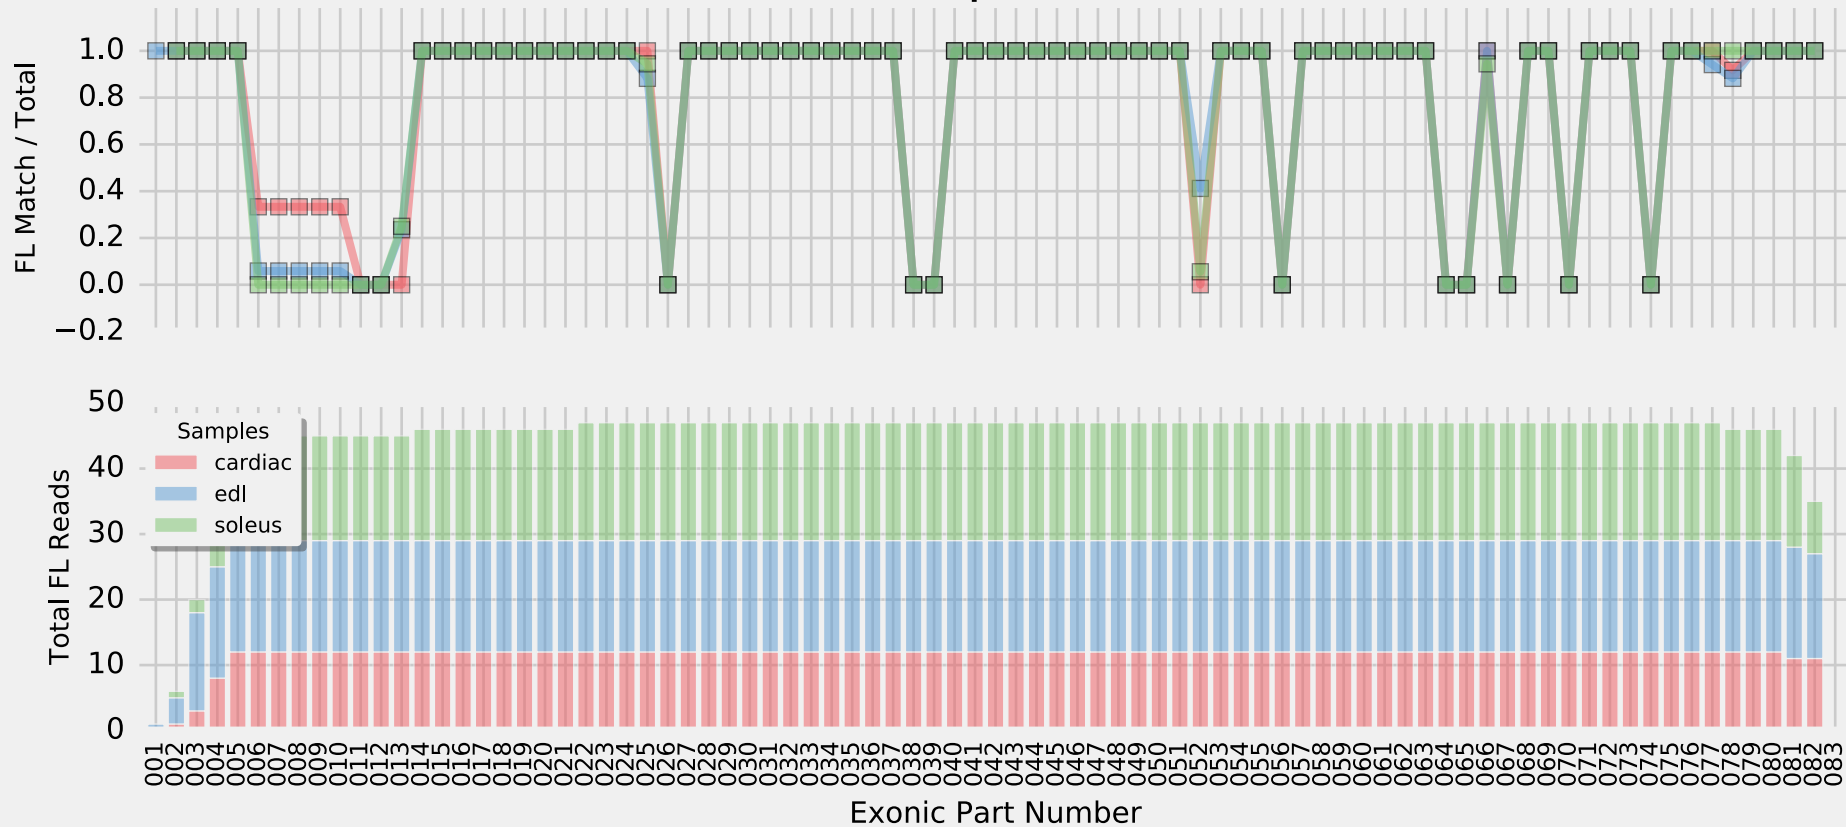

# Dgkd

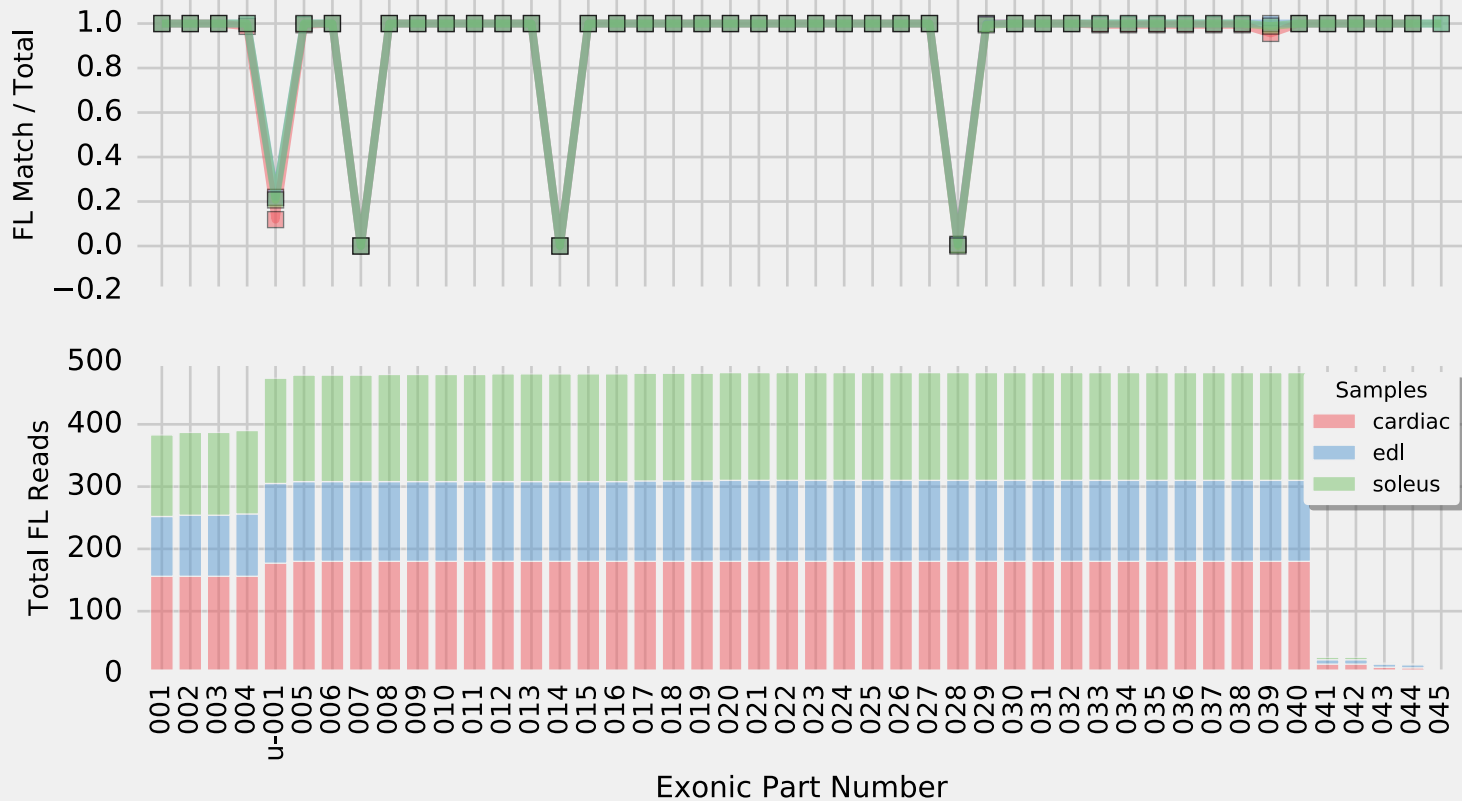

# Dicer1

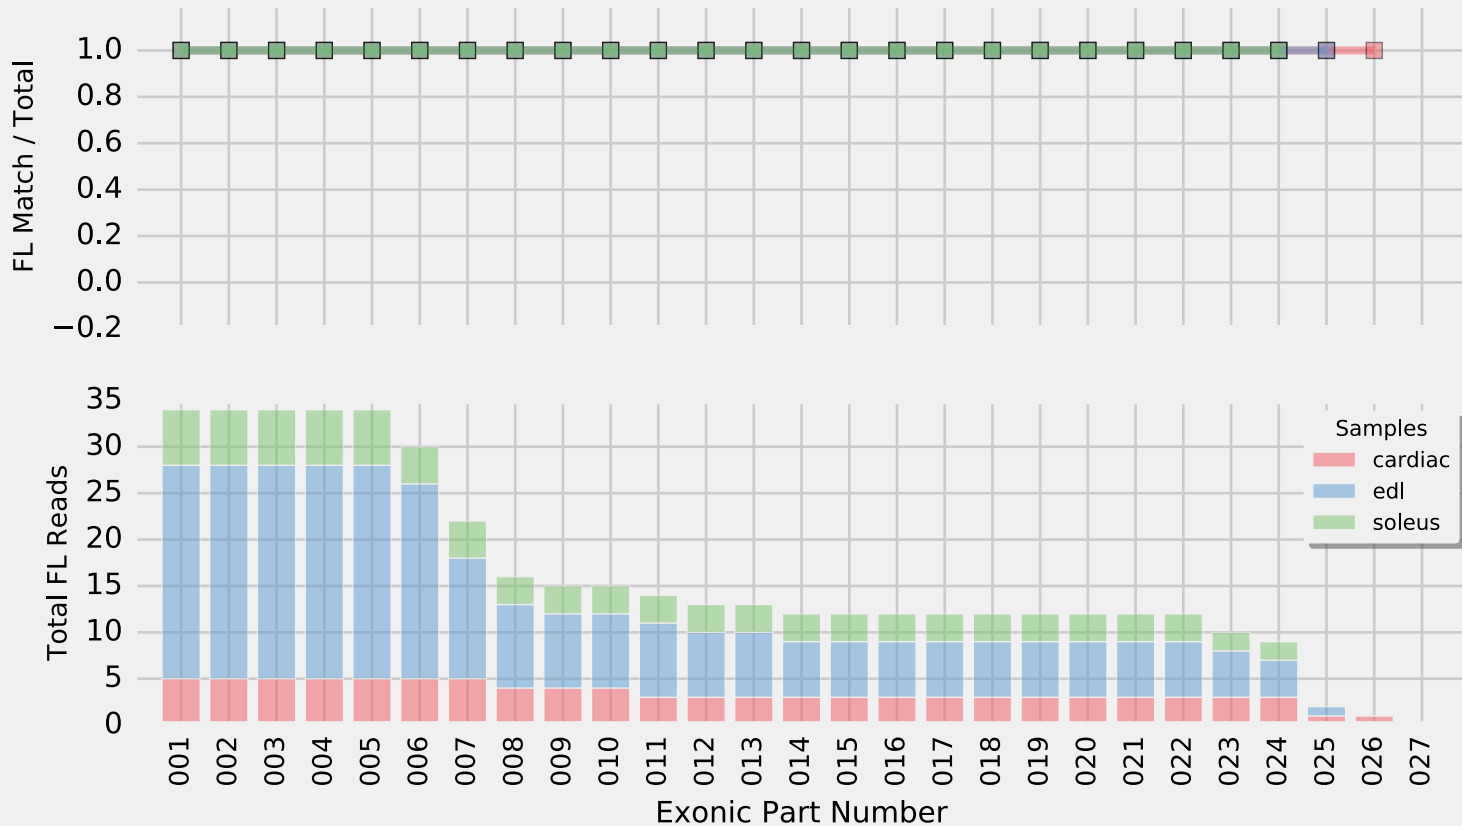

# Dip2c

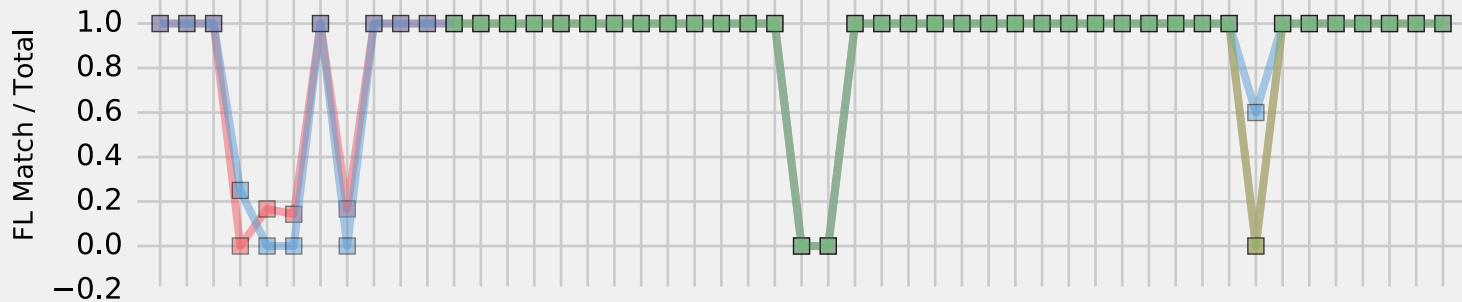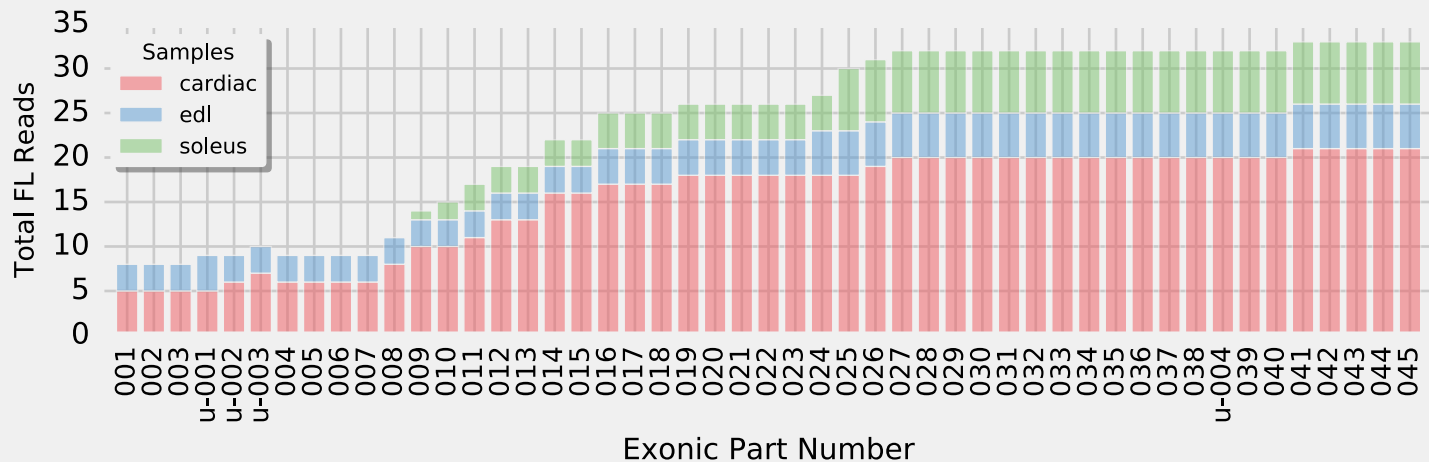

# Dmd

FL Match / Total

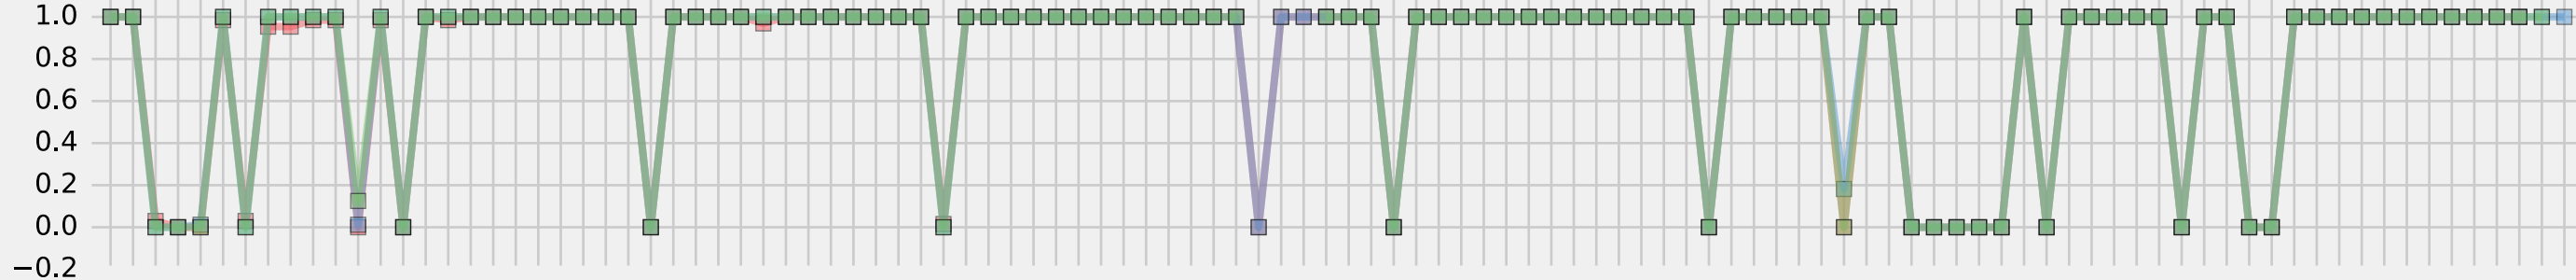

Total FL Reads

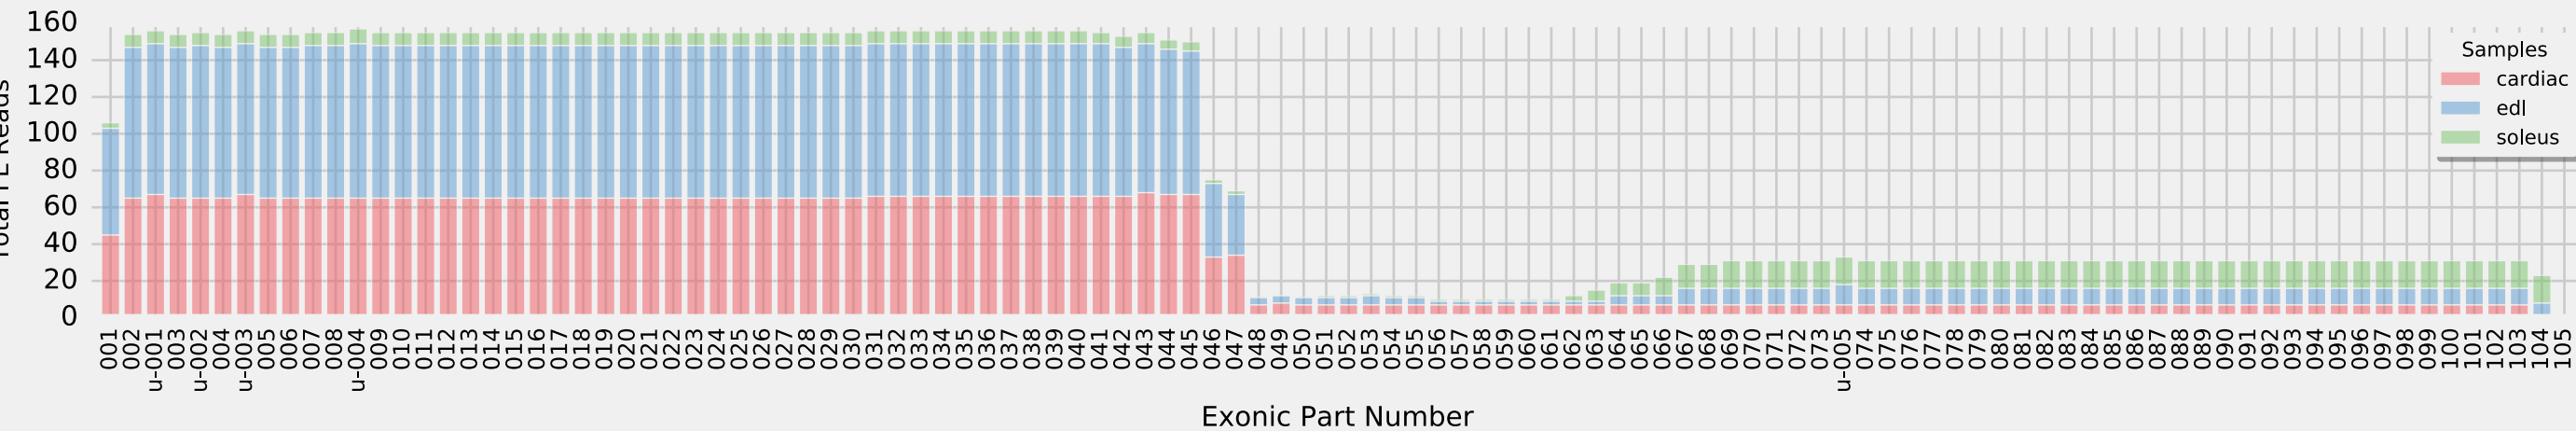



# Dnmt3a

FL Match / Total

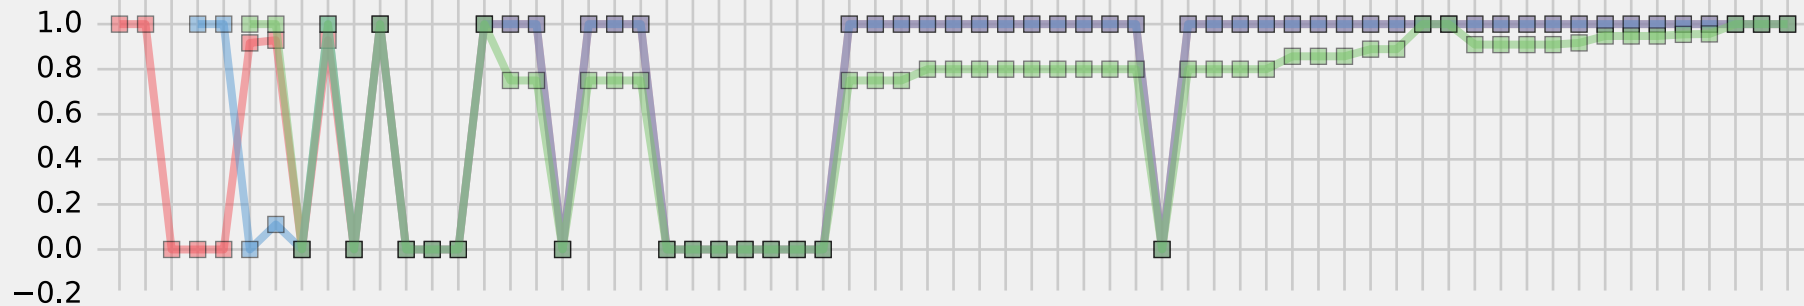

Total FL Reads

Samples  
cardiac  
edl  
soleus

u-001  
u-002  
001  
002  
003  
004  
005  
006  
007  
008  
009  
010  
011  
012  
013  
014  
015  
016  
017  
018  
019  
020  
021  
022  
023  
024  
025  
026  
027  
028  
029  
030  
031  
032  
033  
034  
035  
036  
037  
038  
039  
040  
041  
042  
043  
044  
045  
046  
047  
048  
049  
050  
051  
052  
053  
054  
055  
056  
057  
058  
059  
060  
061  
062  
063

Exonic Part Number

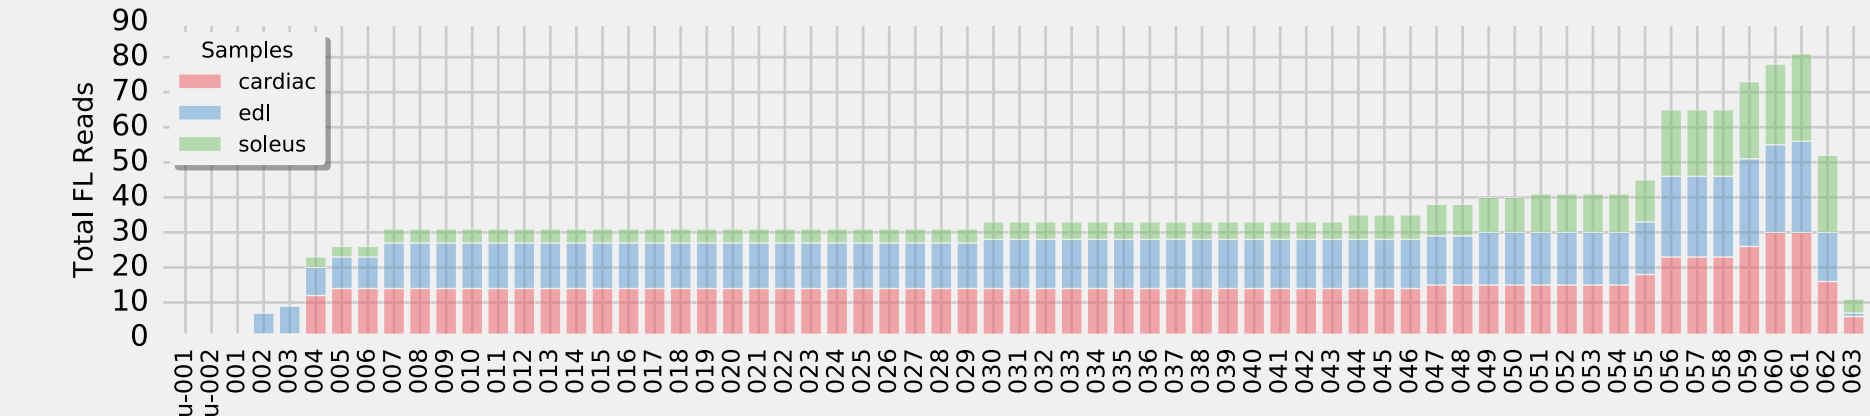

# Dock1

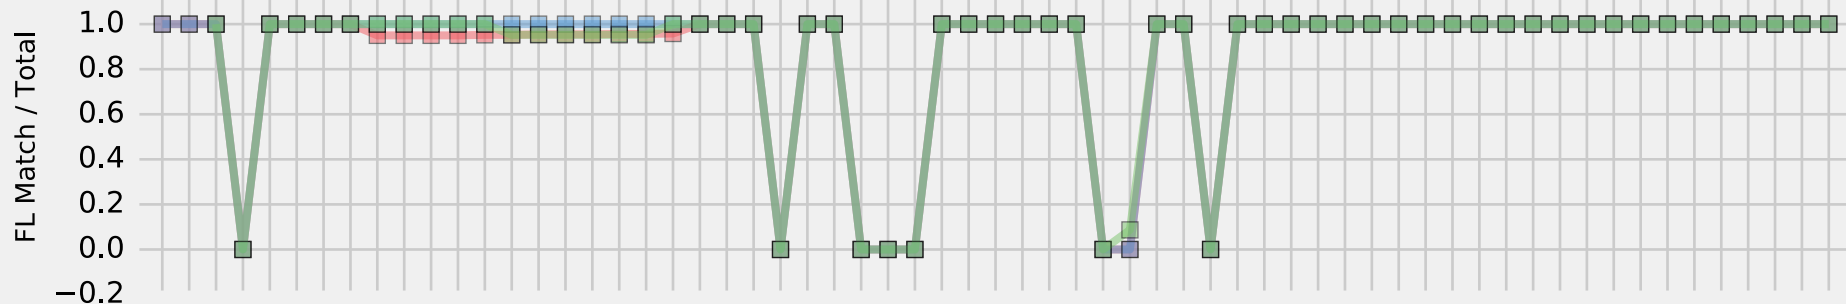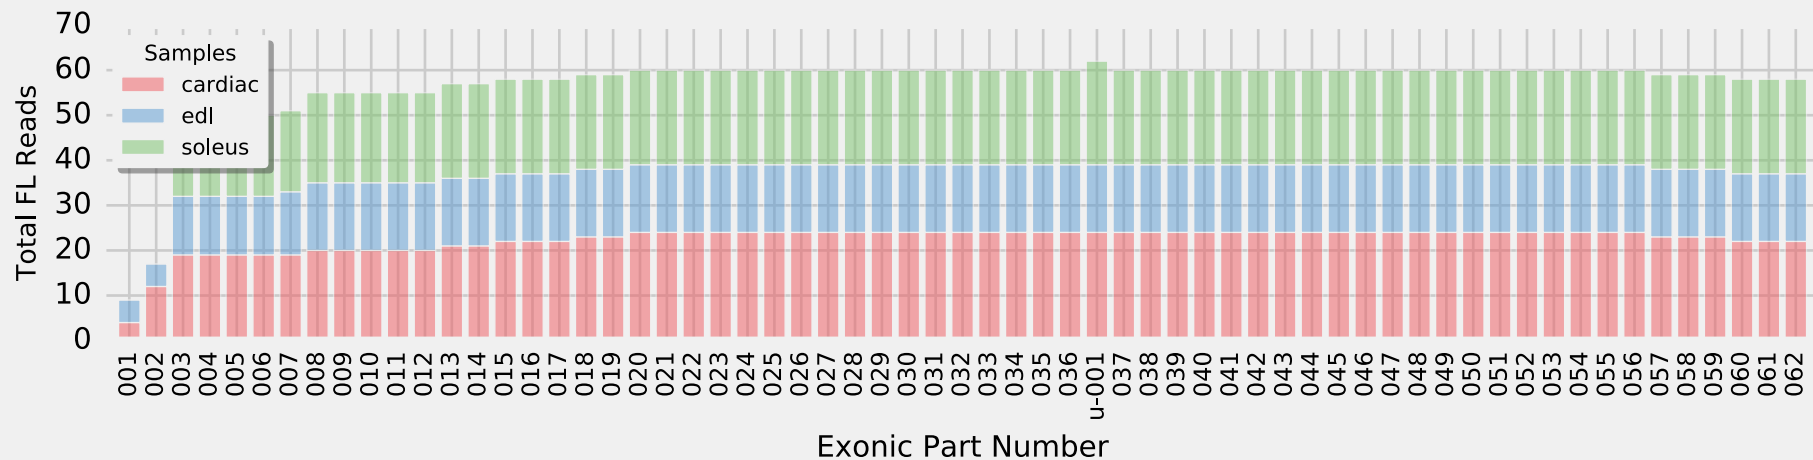

# Dpp8

FL Match / Total

1.0  
0.8  
0.6  
0.4  
0.2  
0.0  
-0.2

Total FL Reads

Samples

cardiac  
edl  
soleus

001 002 003 004 005 006 007 008 009 010 011 012 013 014 015 016 017 018 019 020 021 022 023 u-001

Exonic Part Number

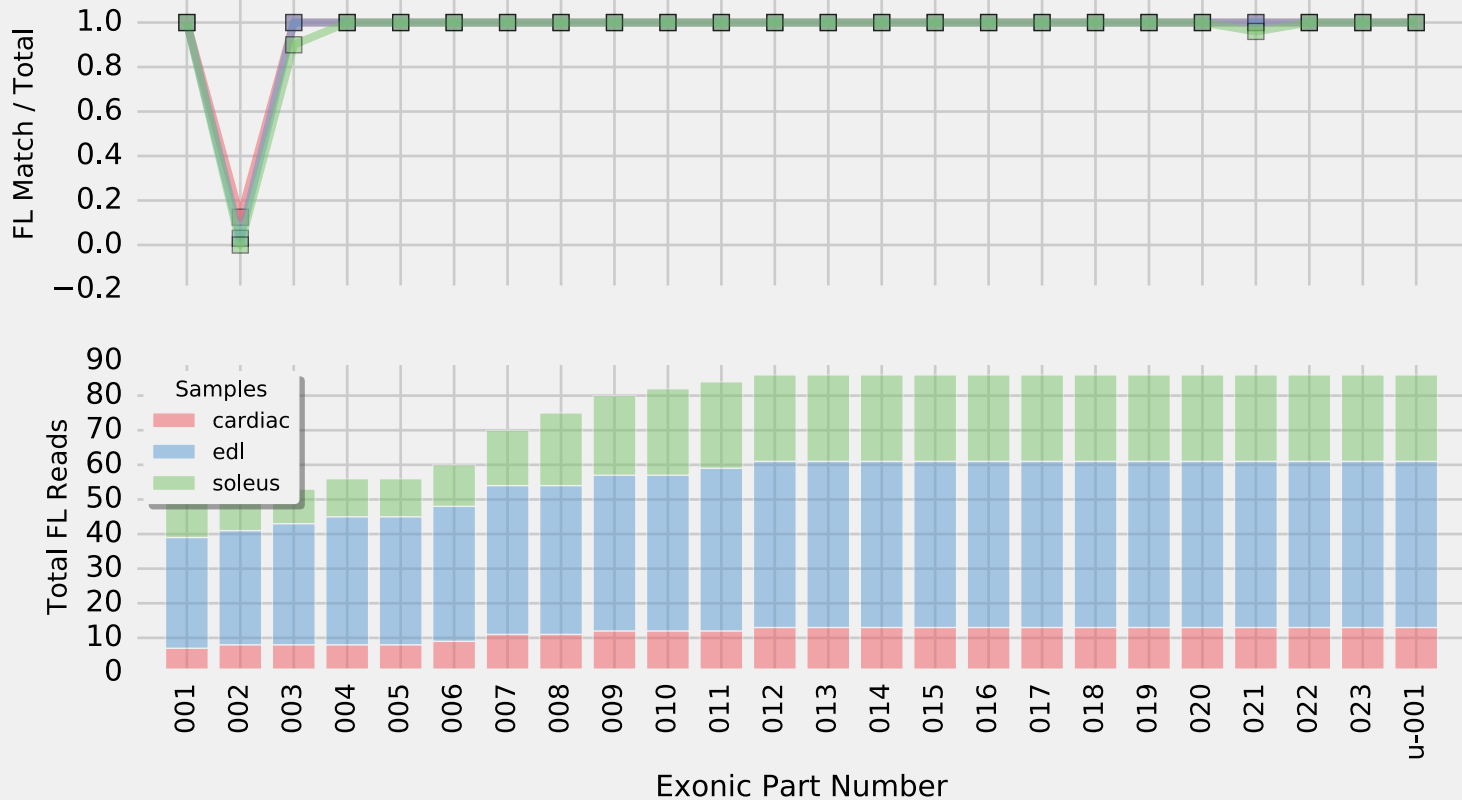

# Dpy19l4

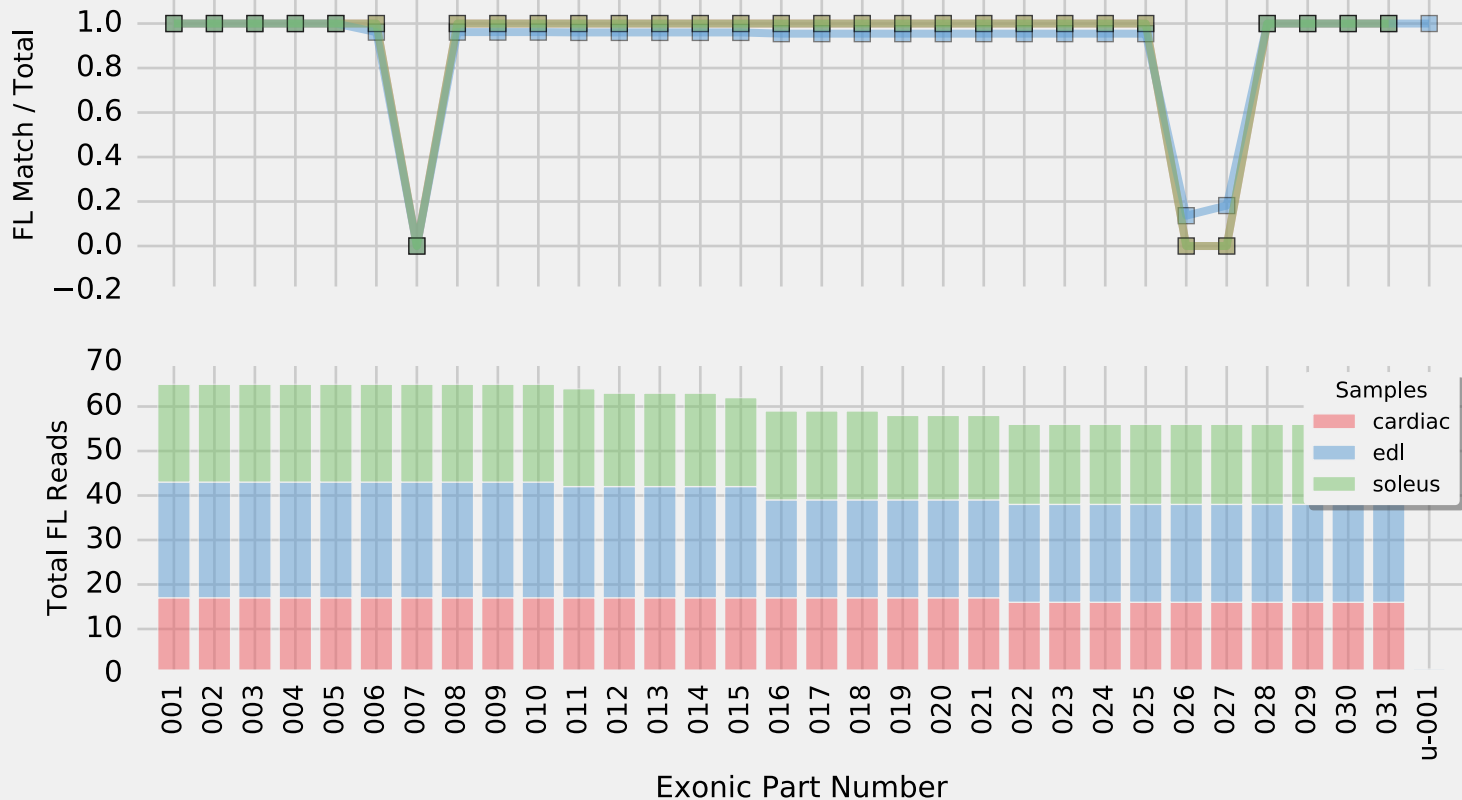

# Dsg2

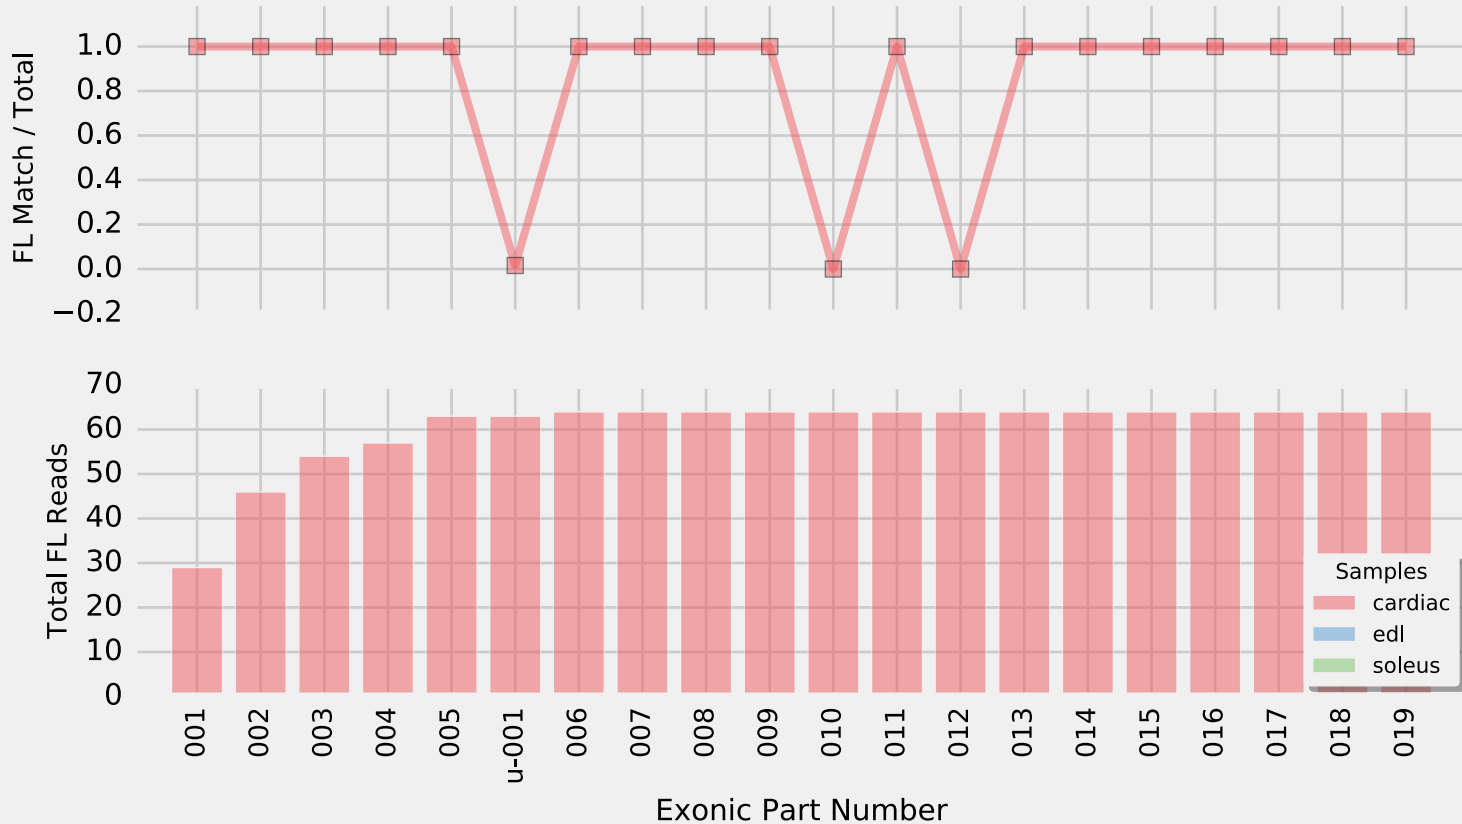

# Dsp

FL Match / Total

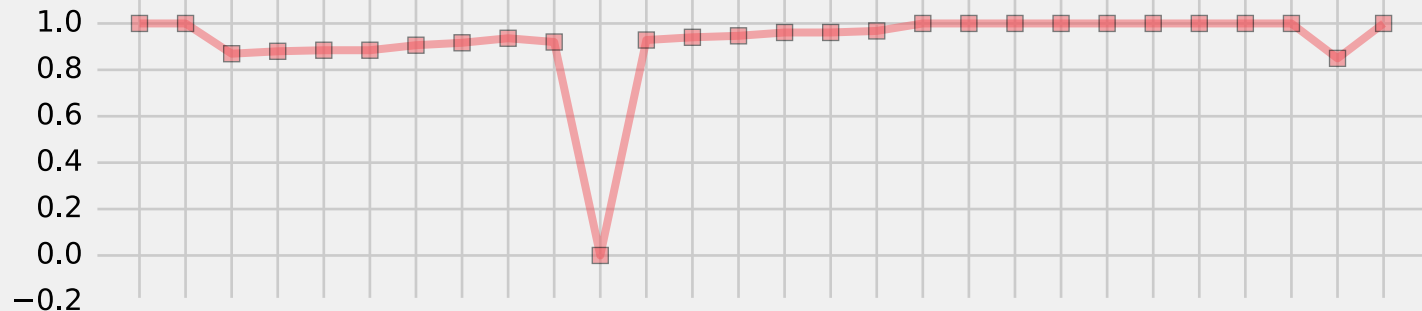

Total FL Reads

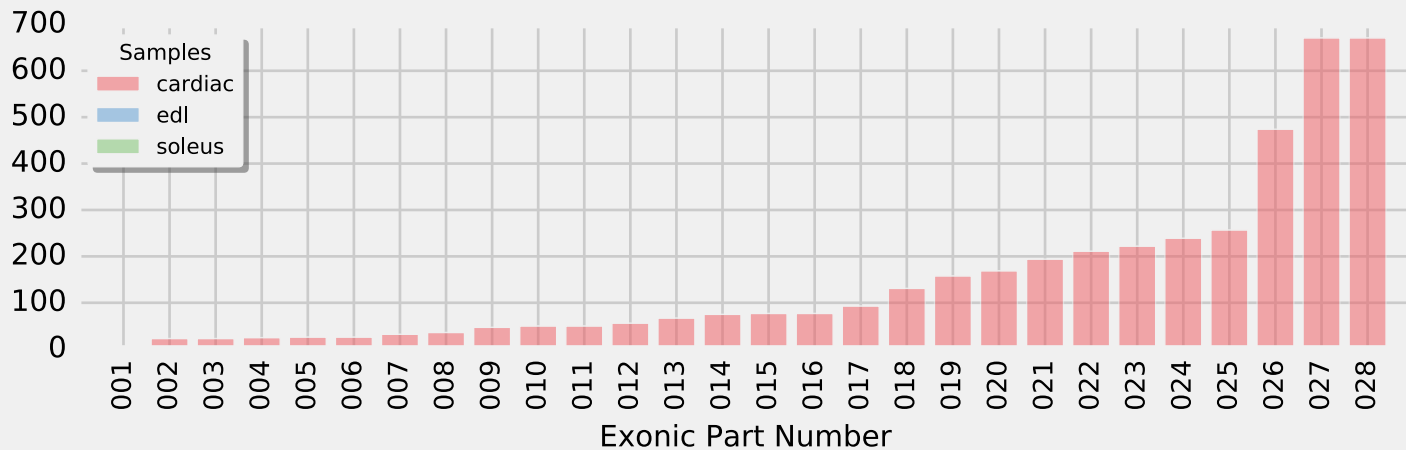

# Dst

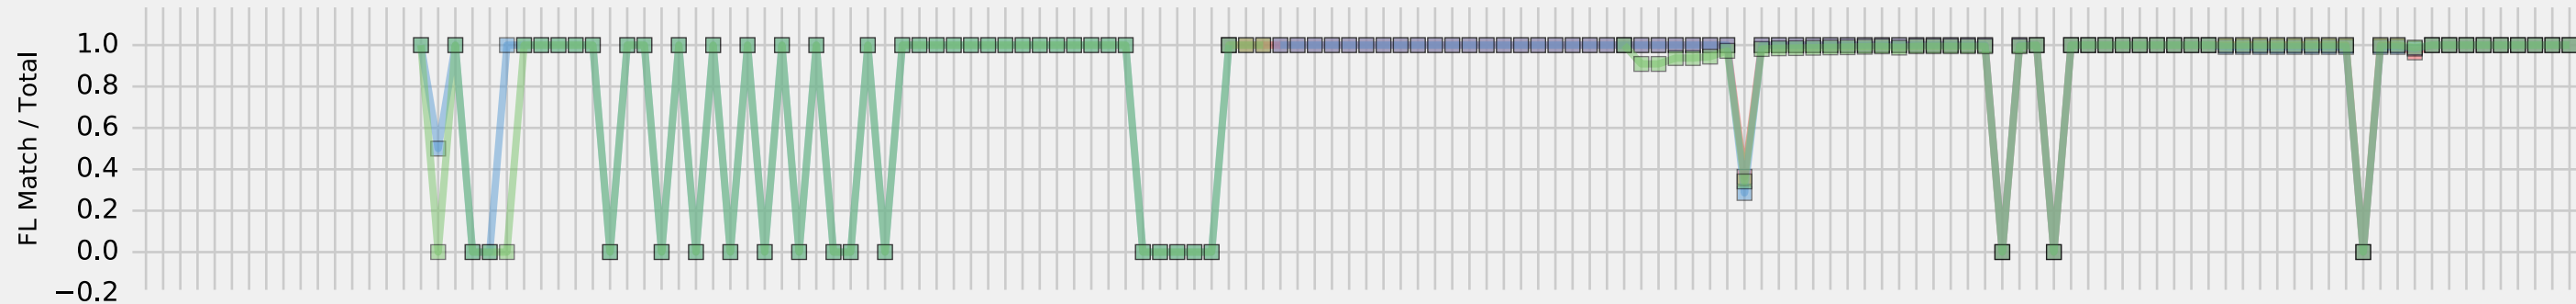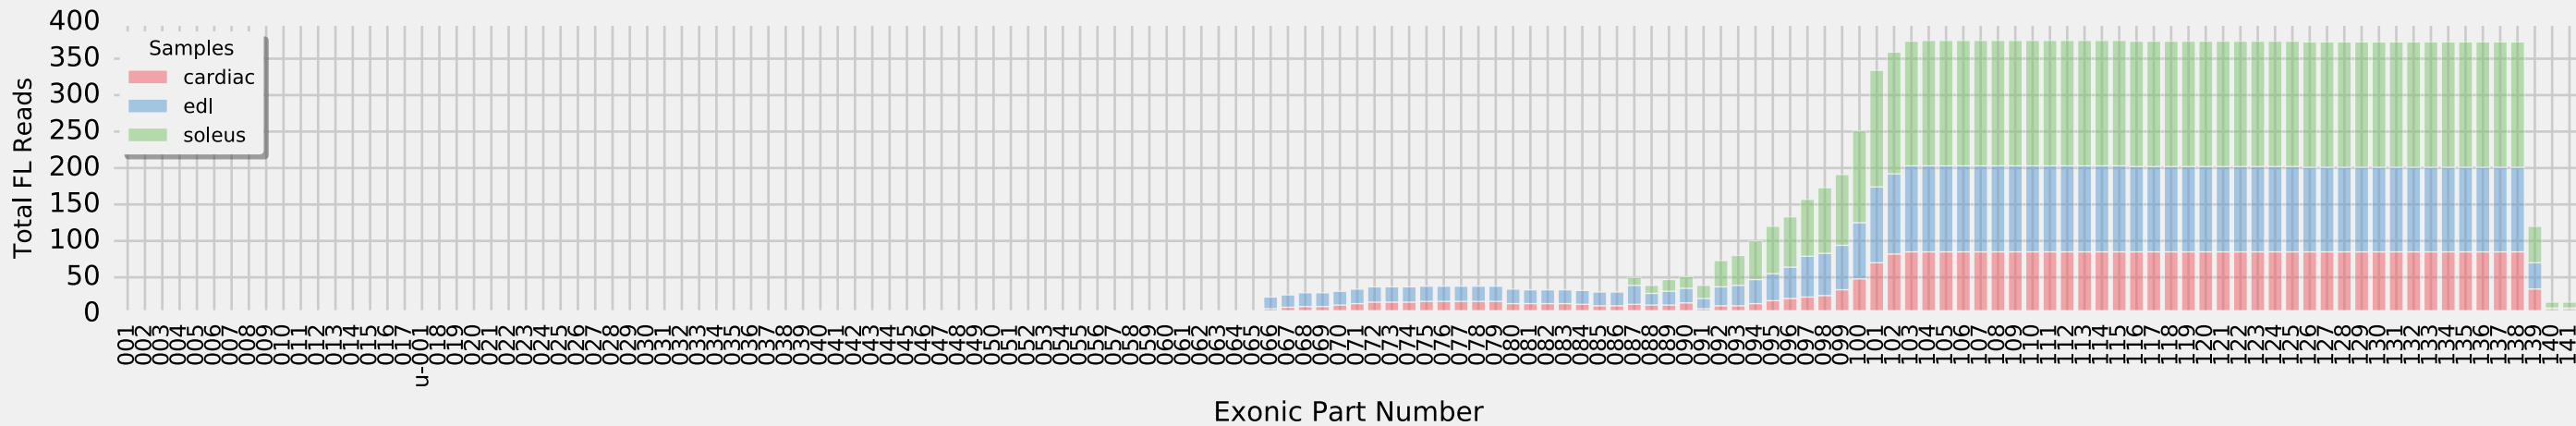

# Dstyk

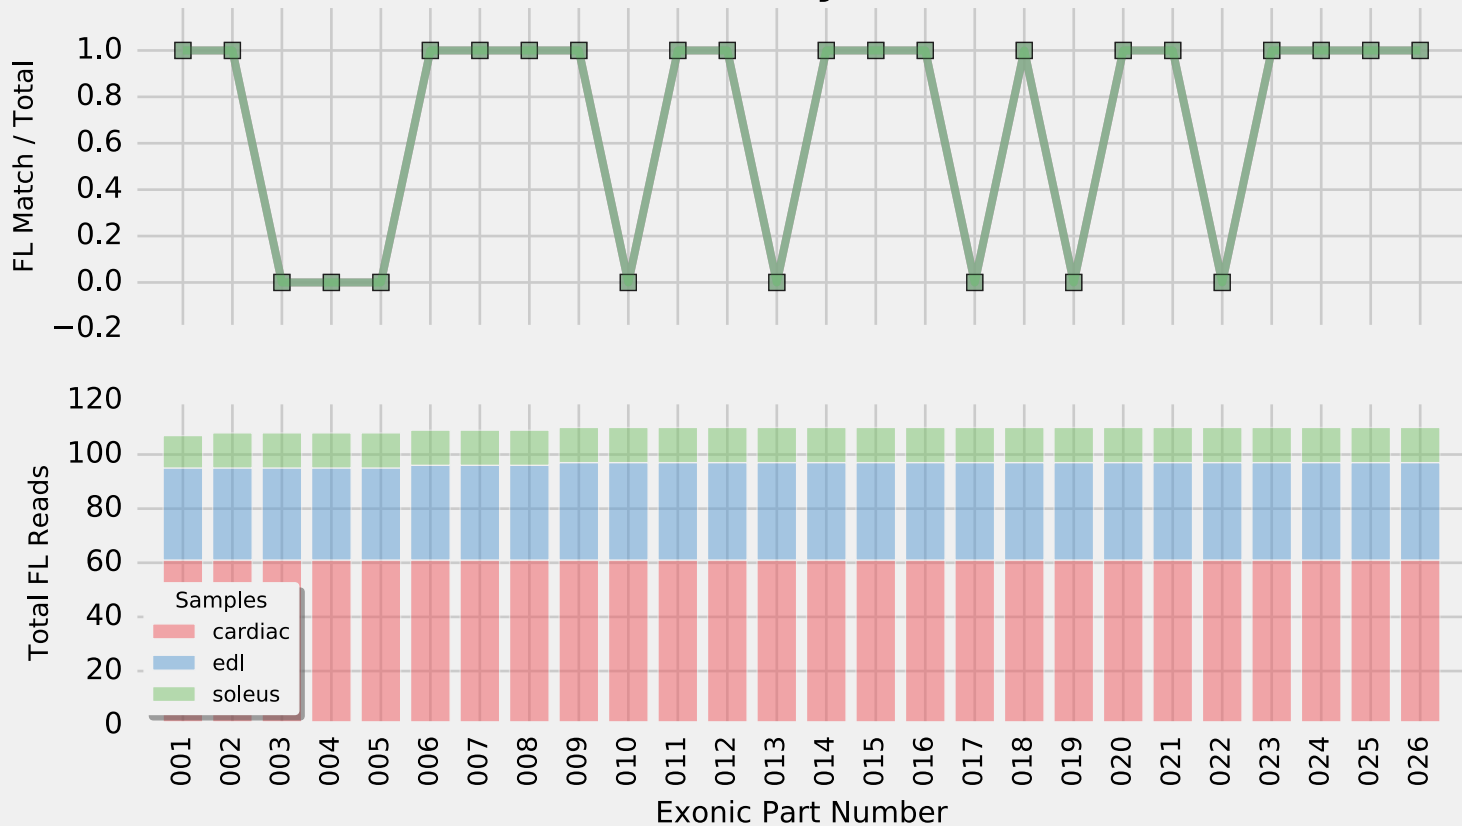



# Dync1h1

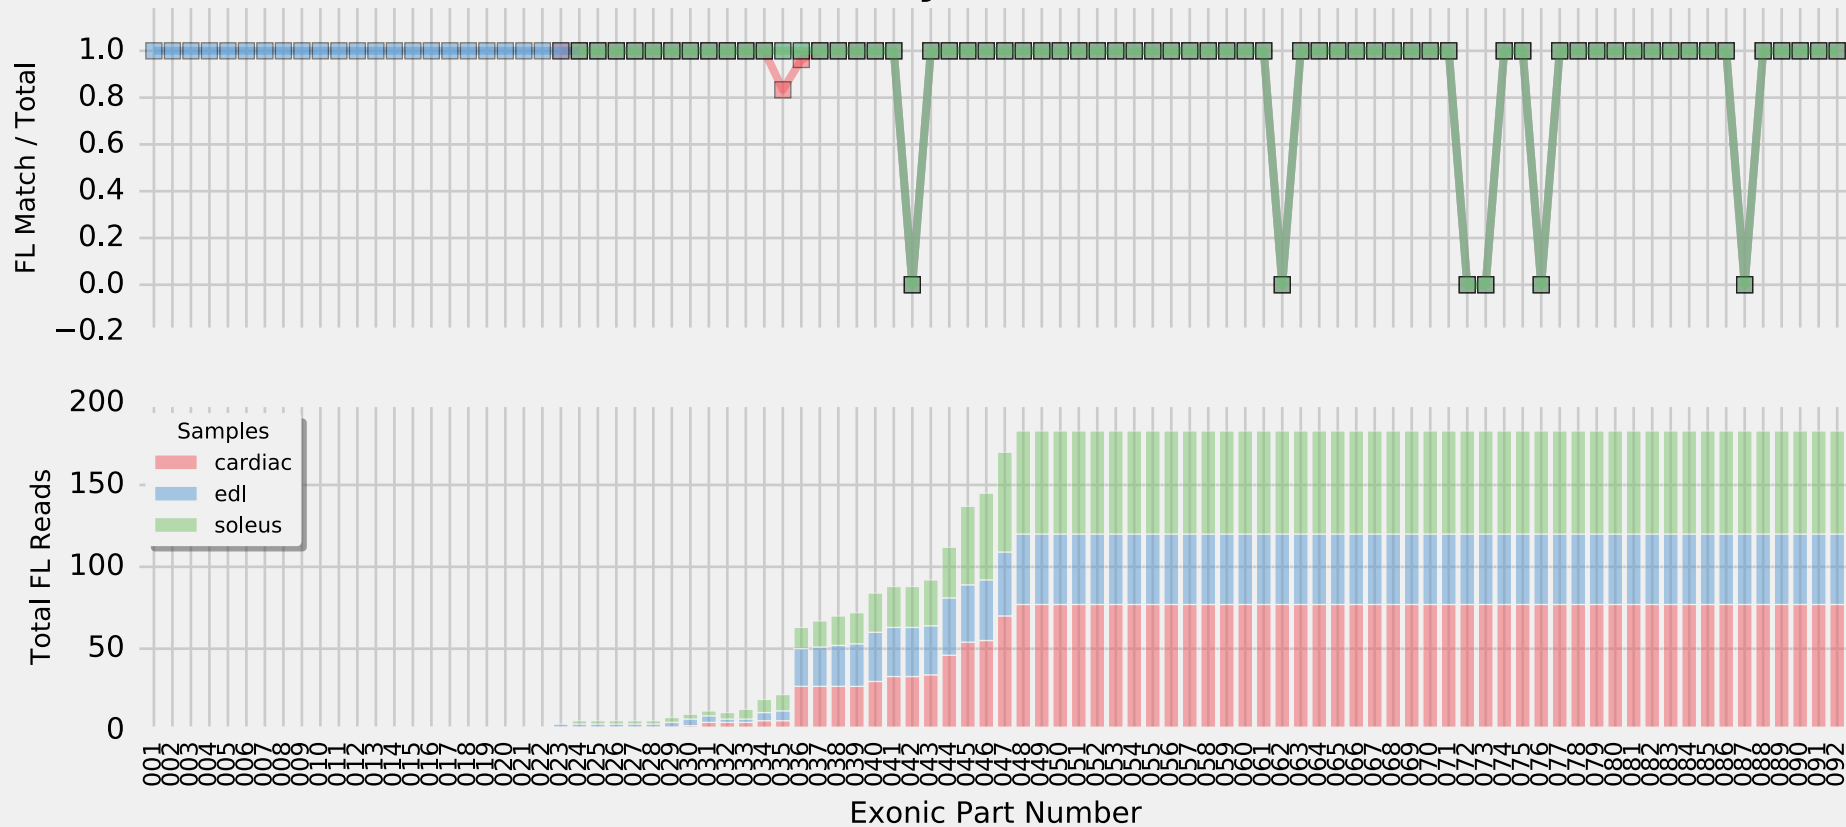

# Dysf

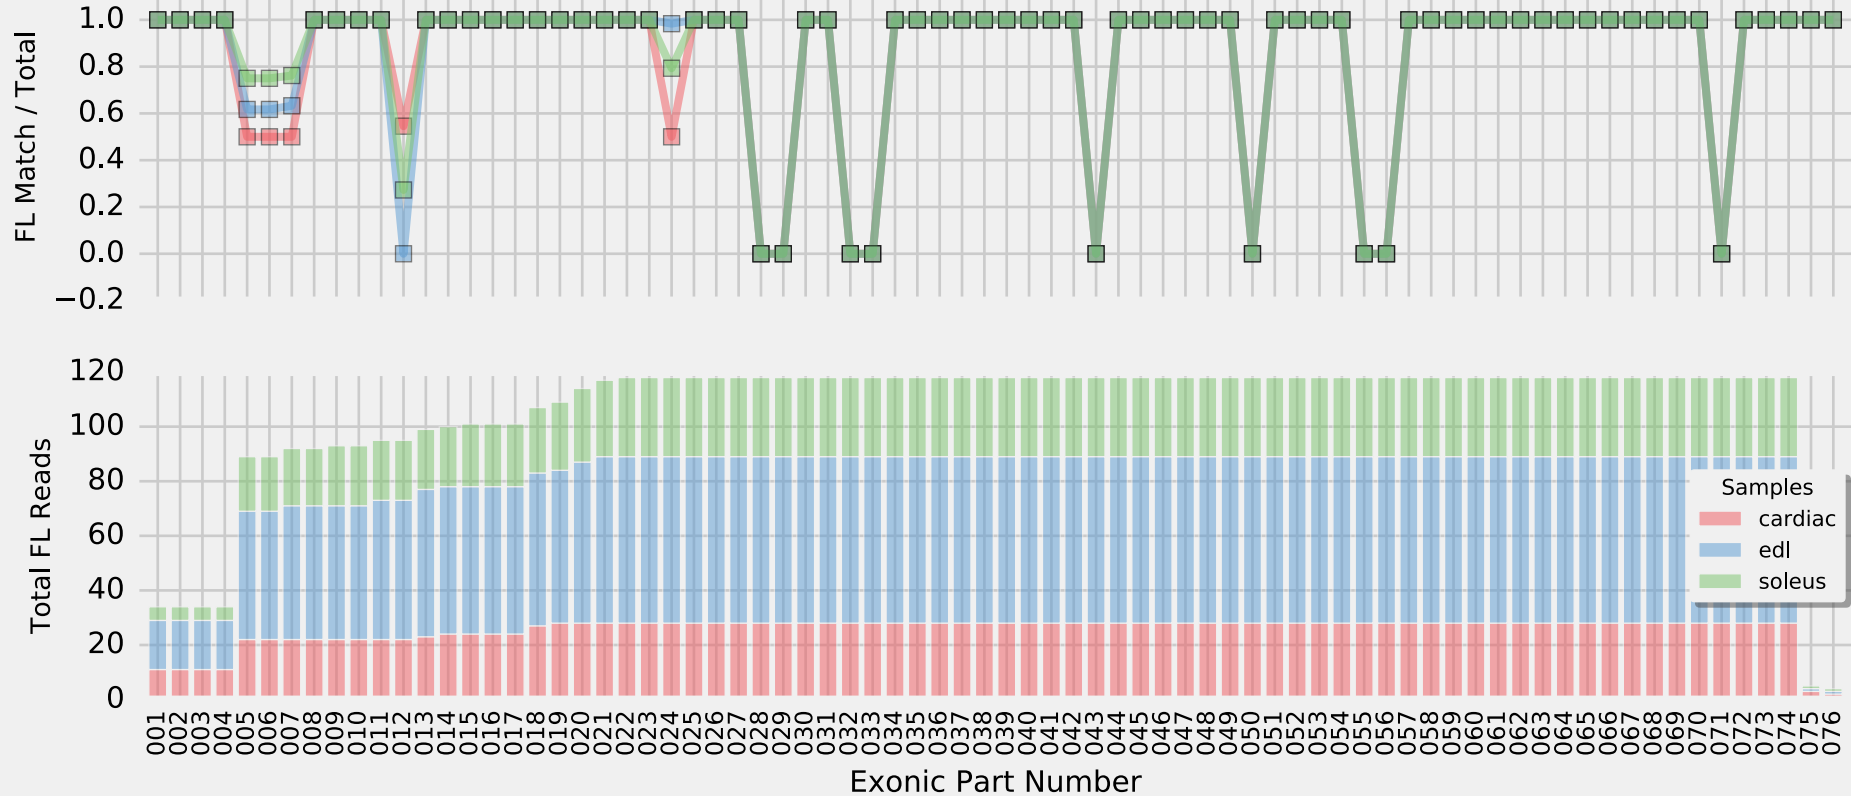

# Edem3

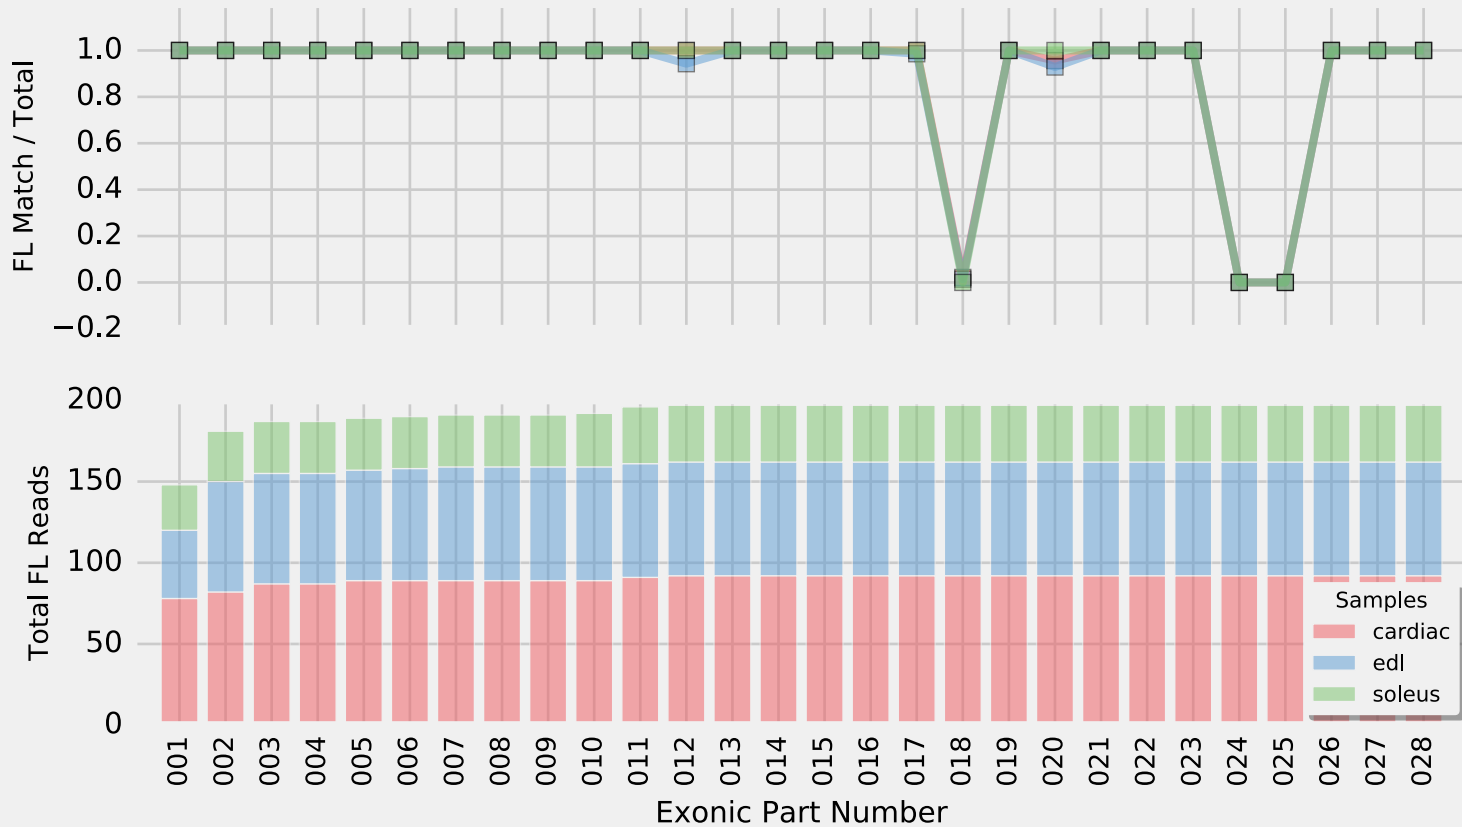

# Efcab14

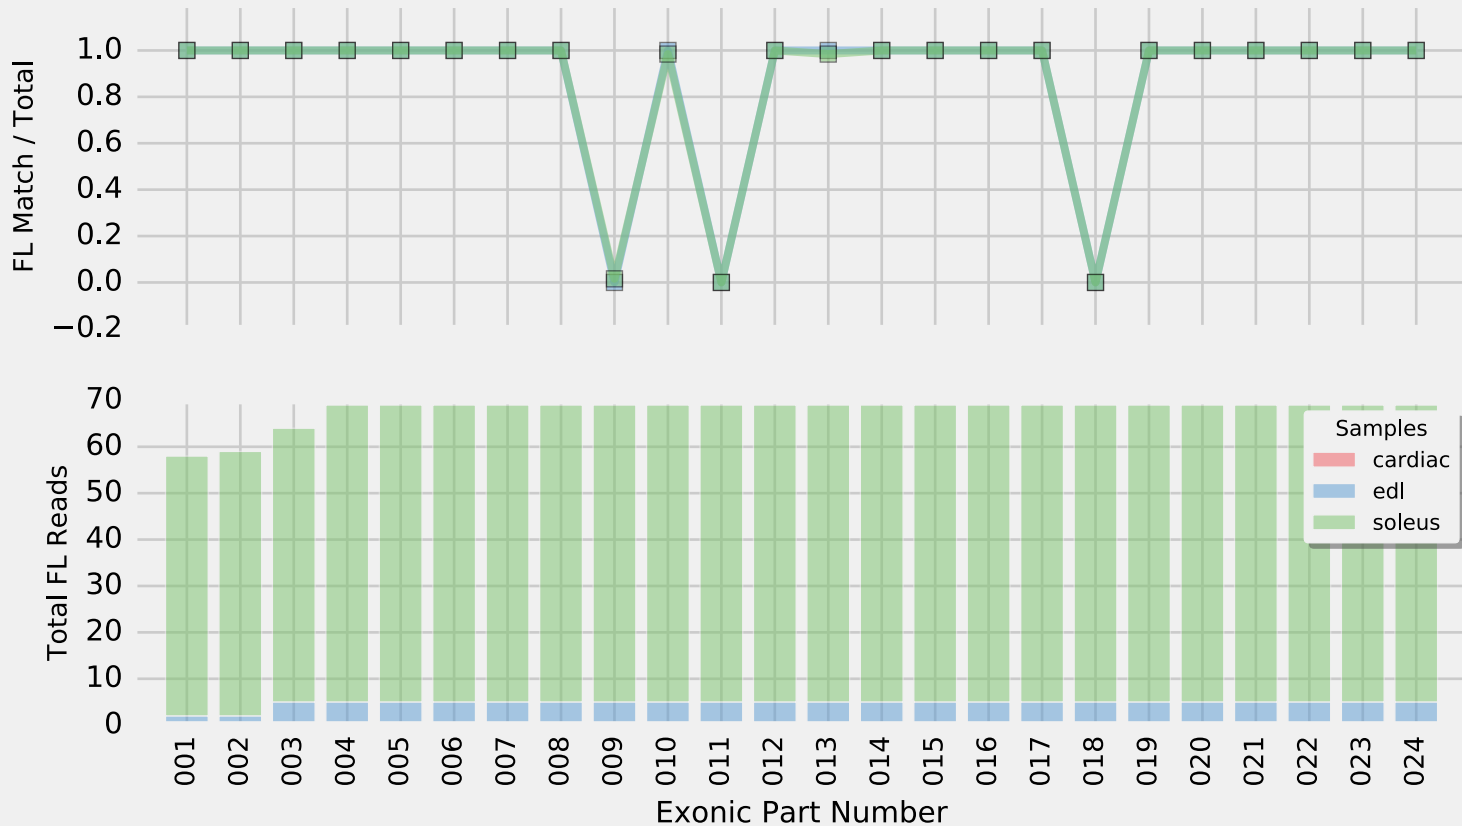

# Efr3b

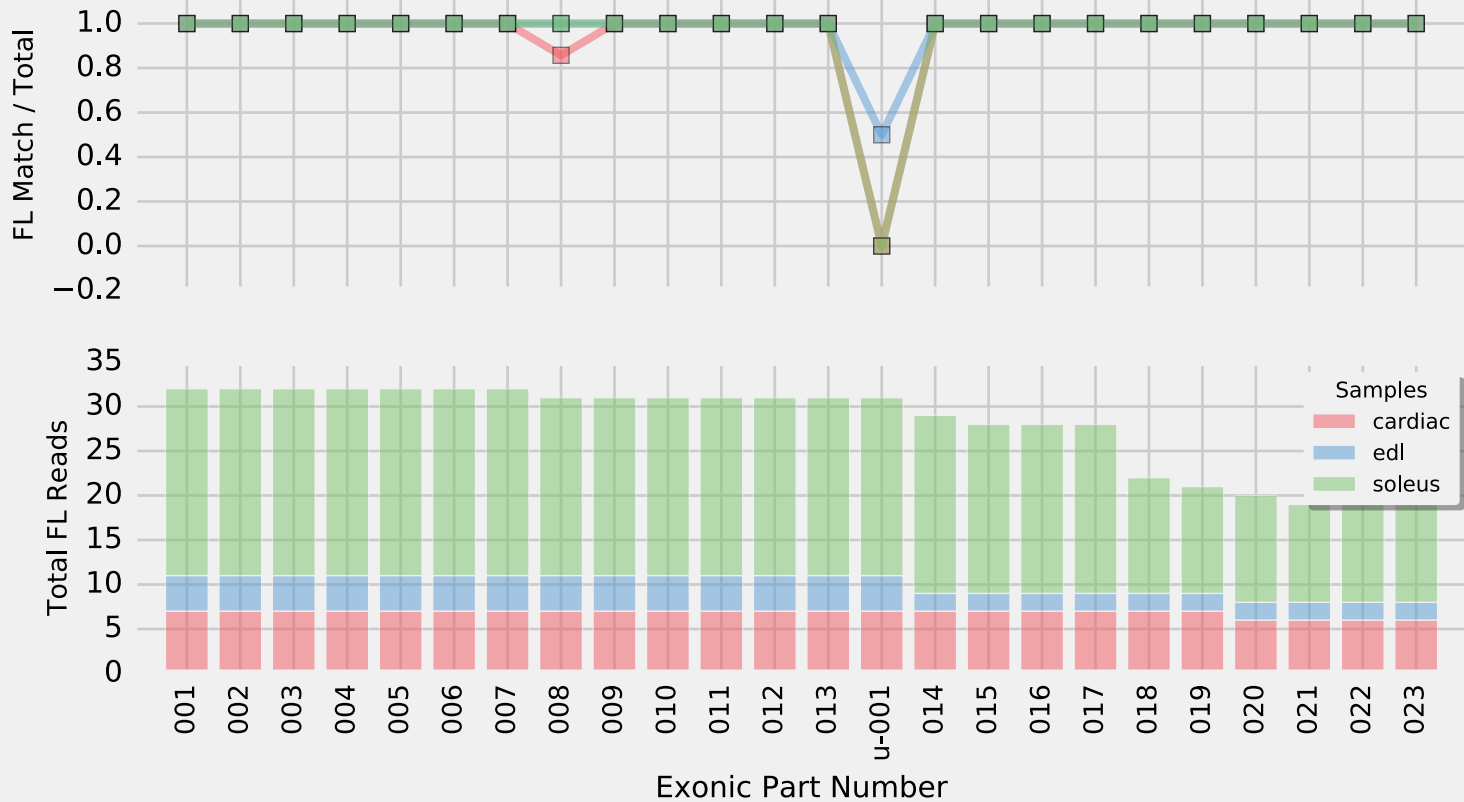

# Ehbp1l1

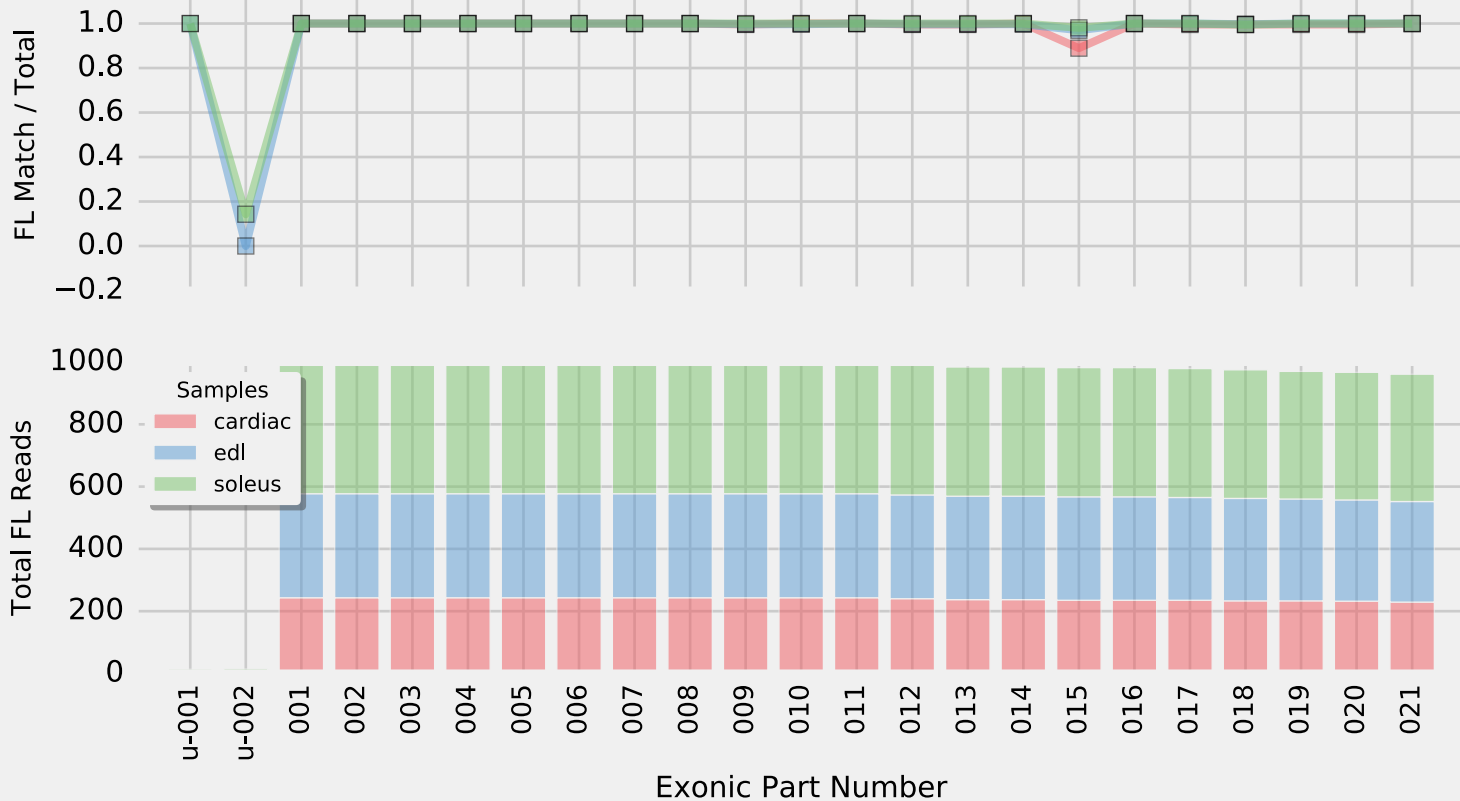

# Eif4g1

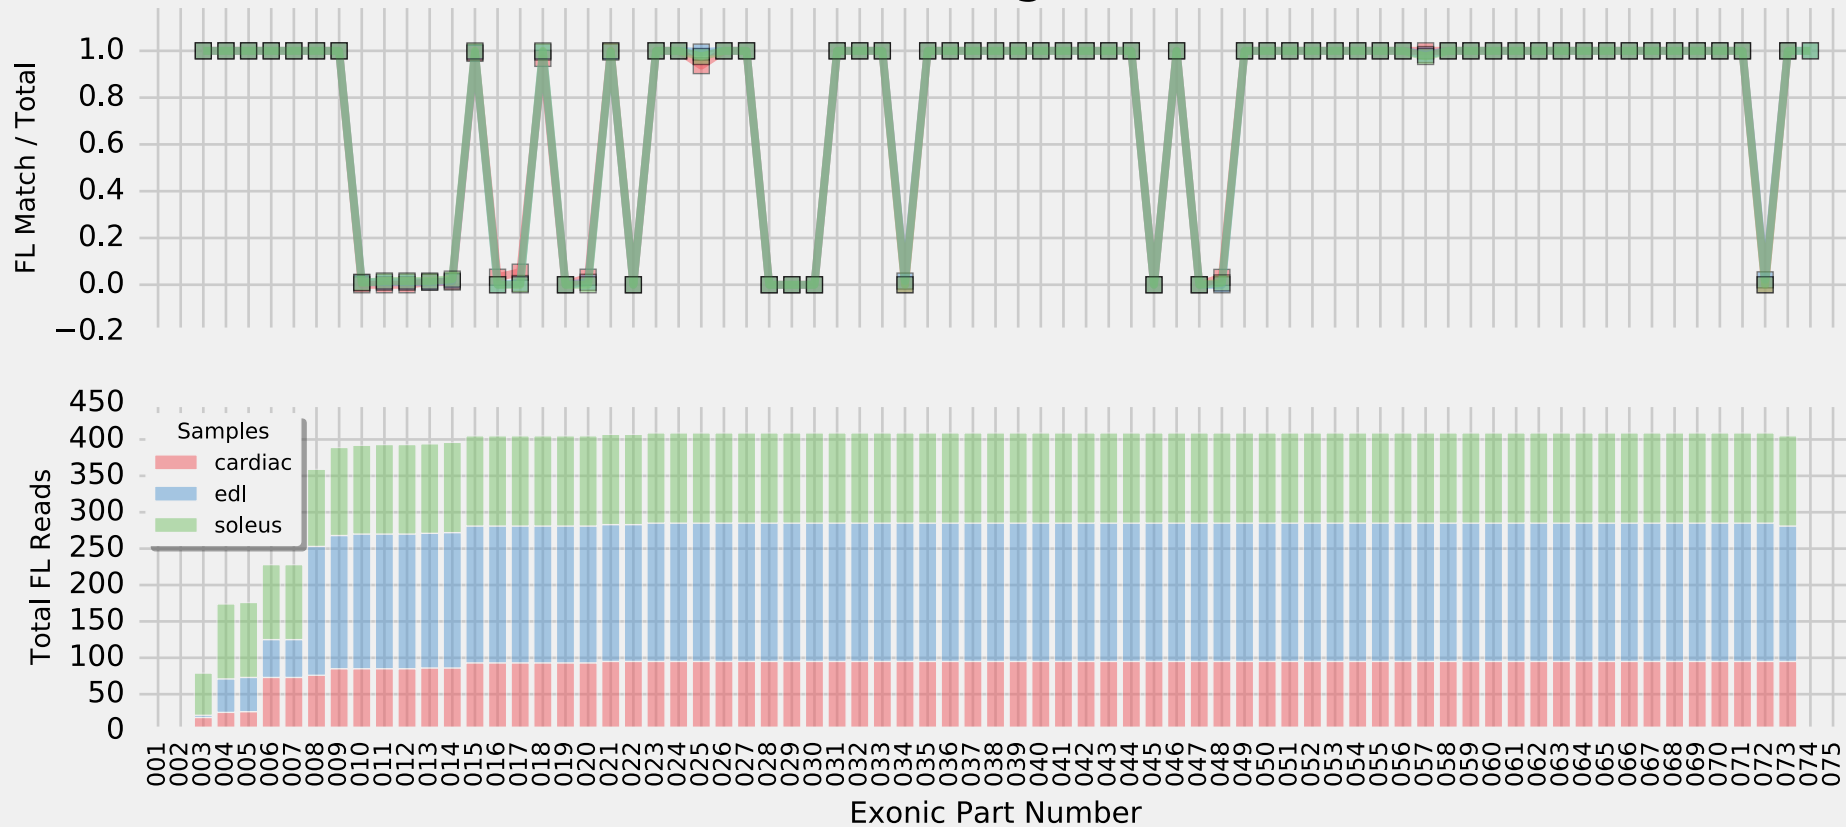

# Eif4g2

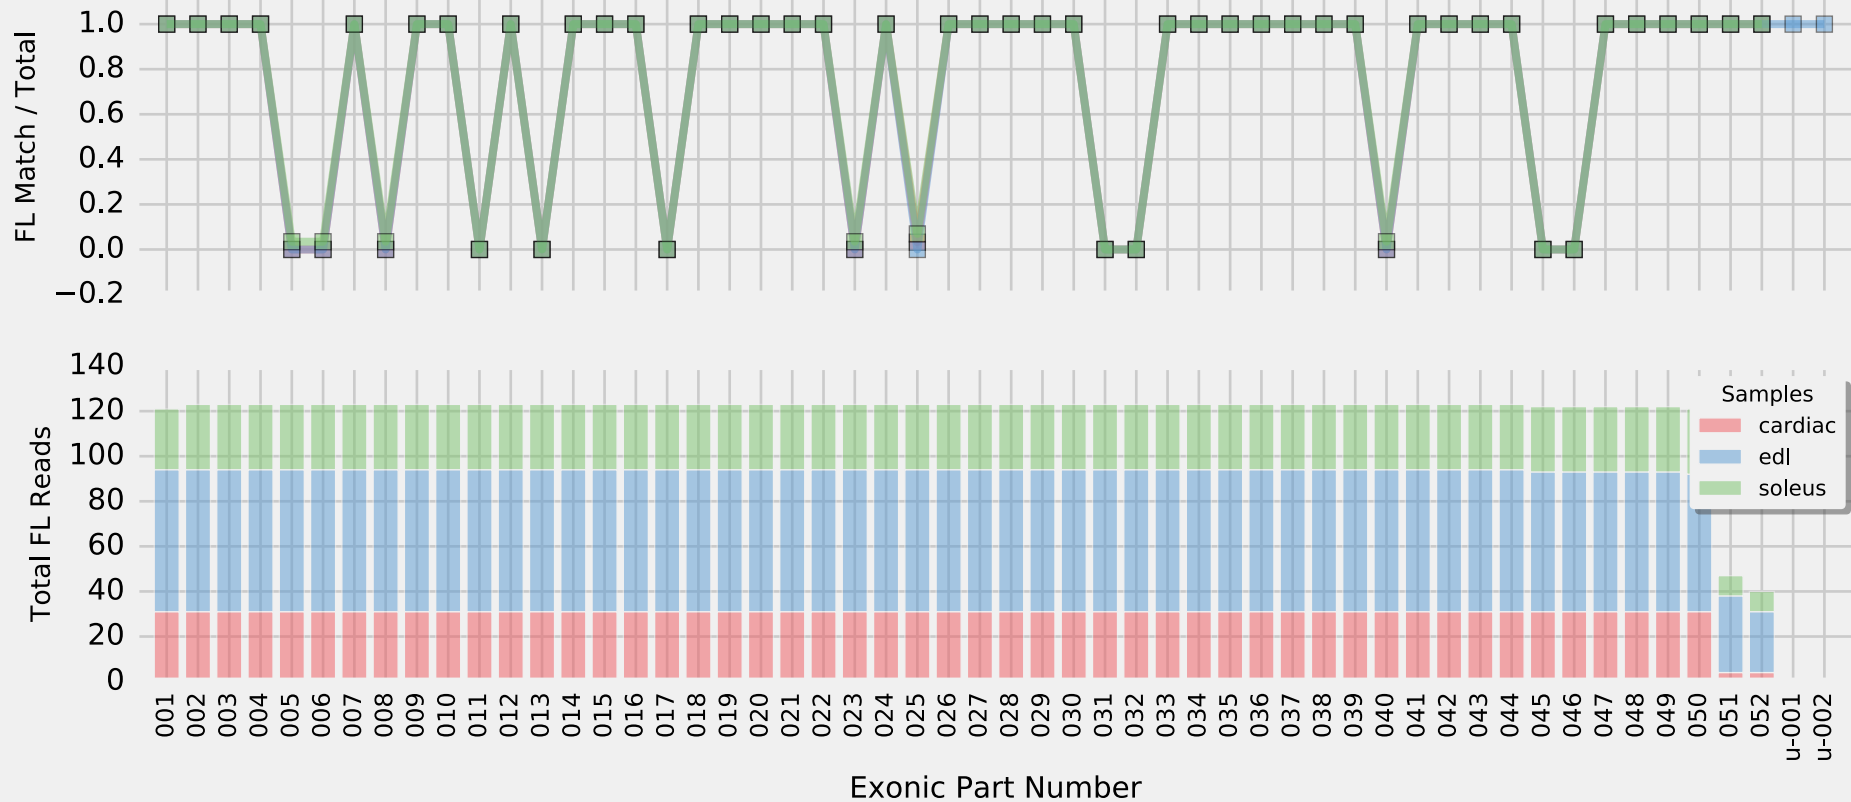



# Eif4g3

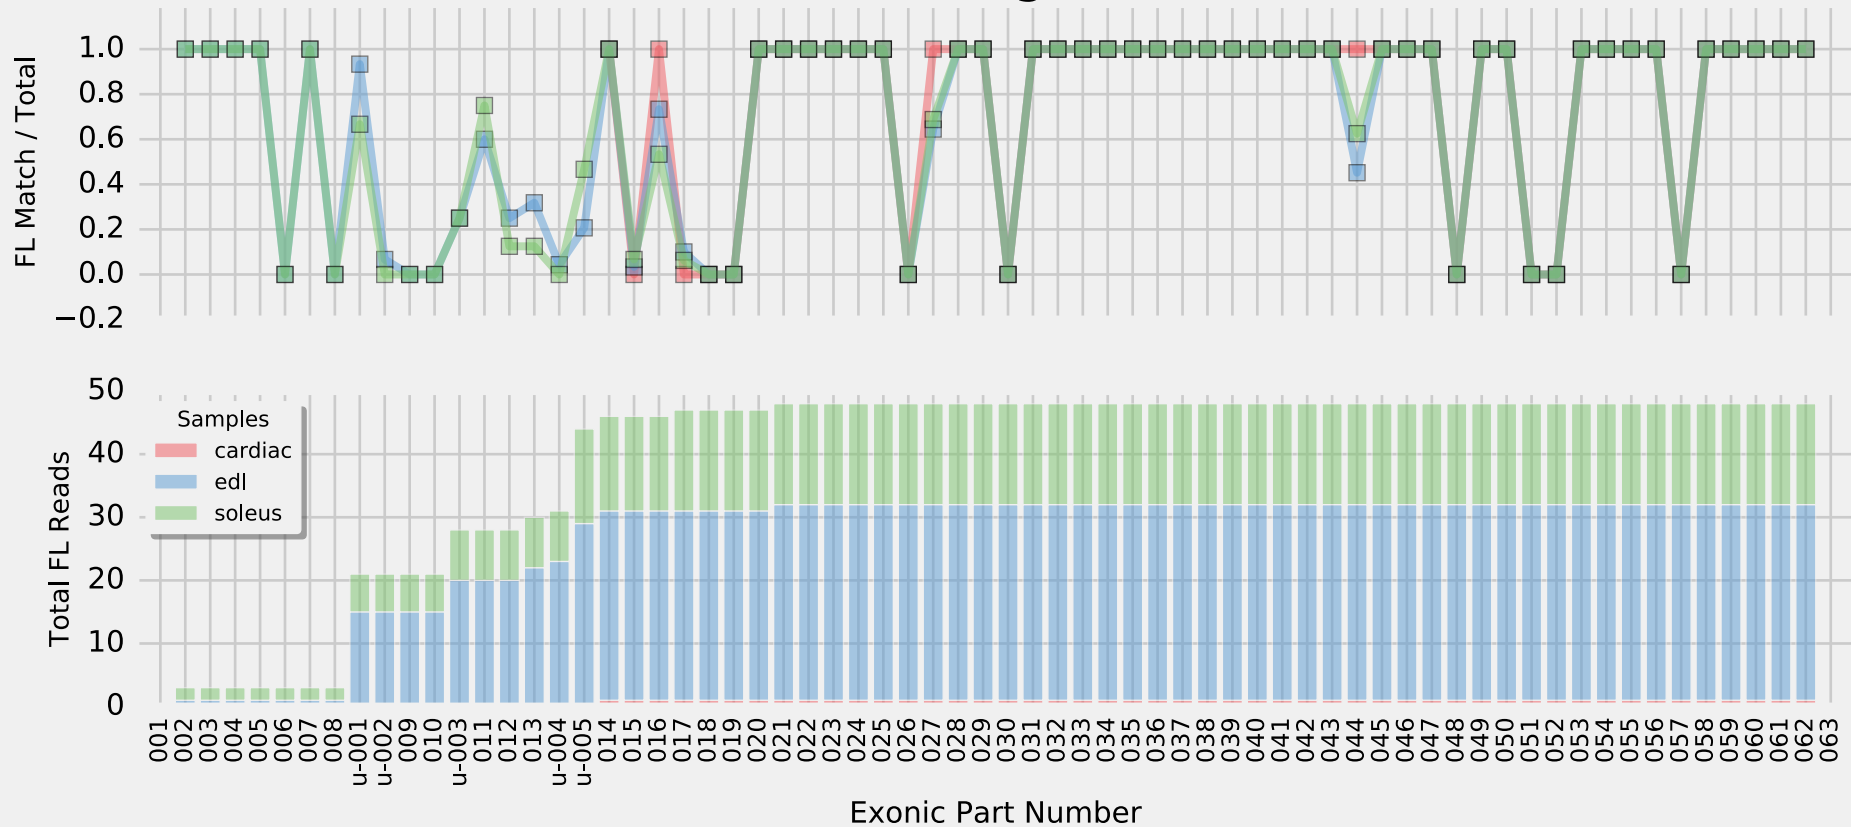

# Elk4

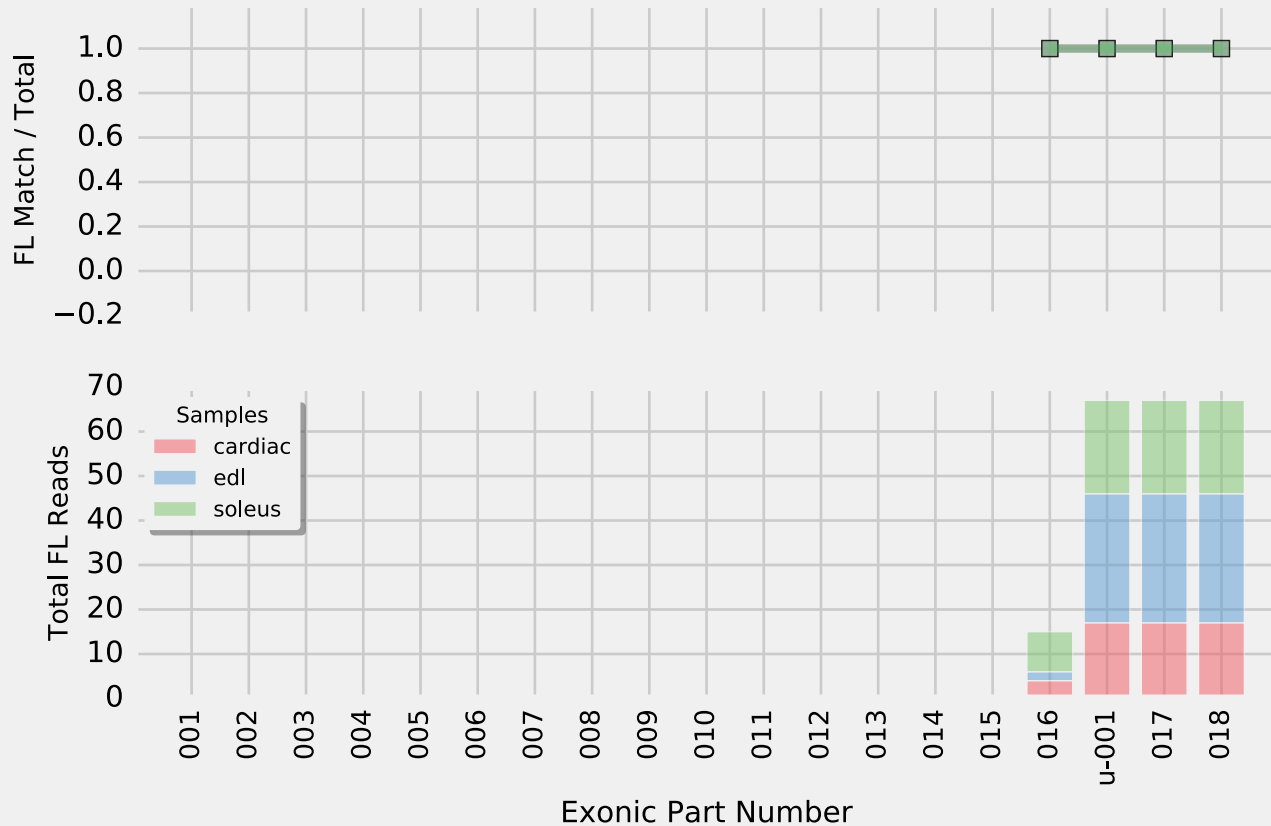

# Epas1

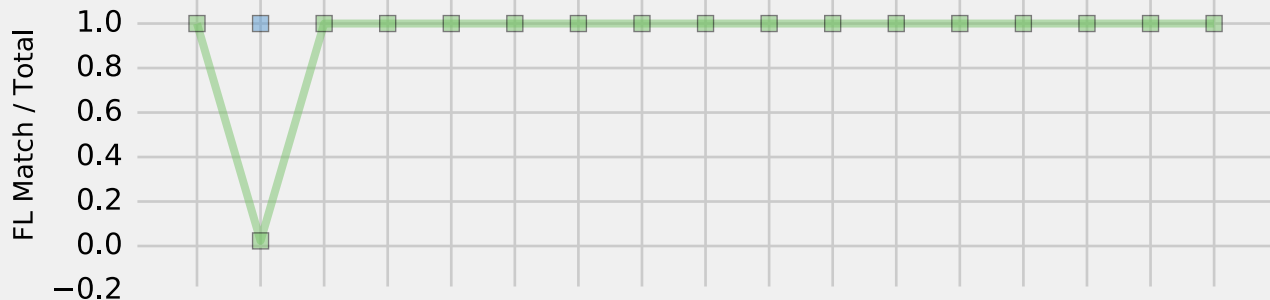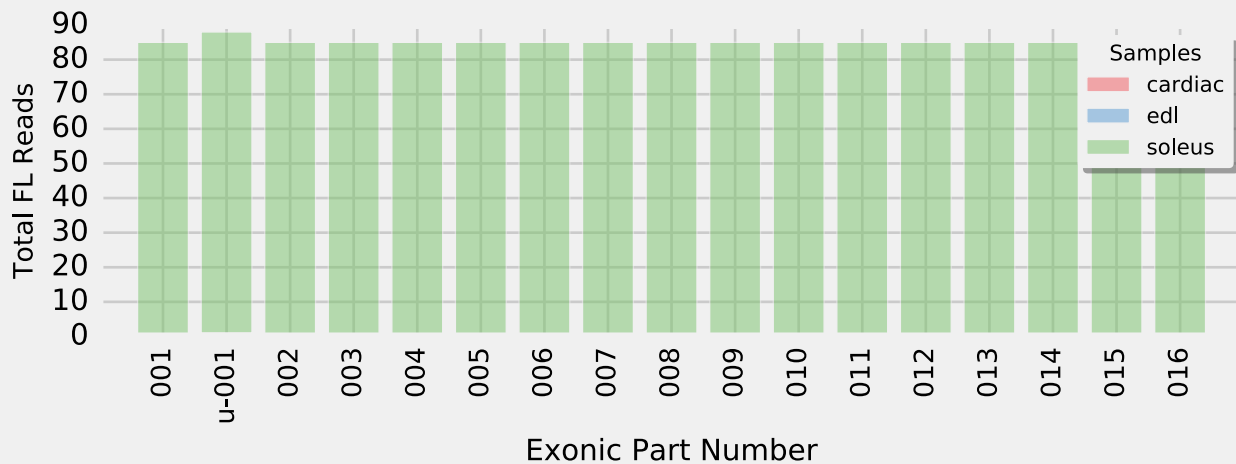

# Epb41

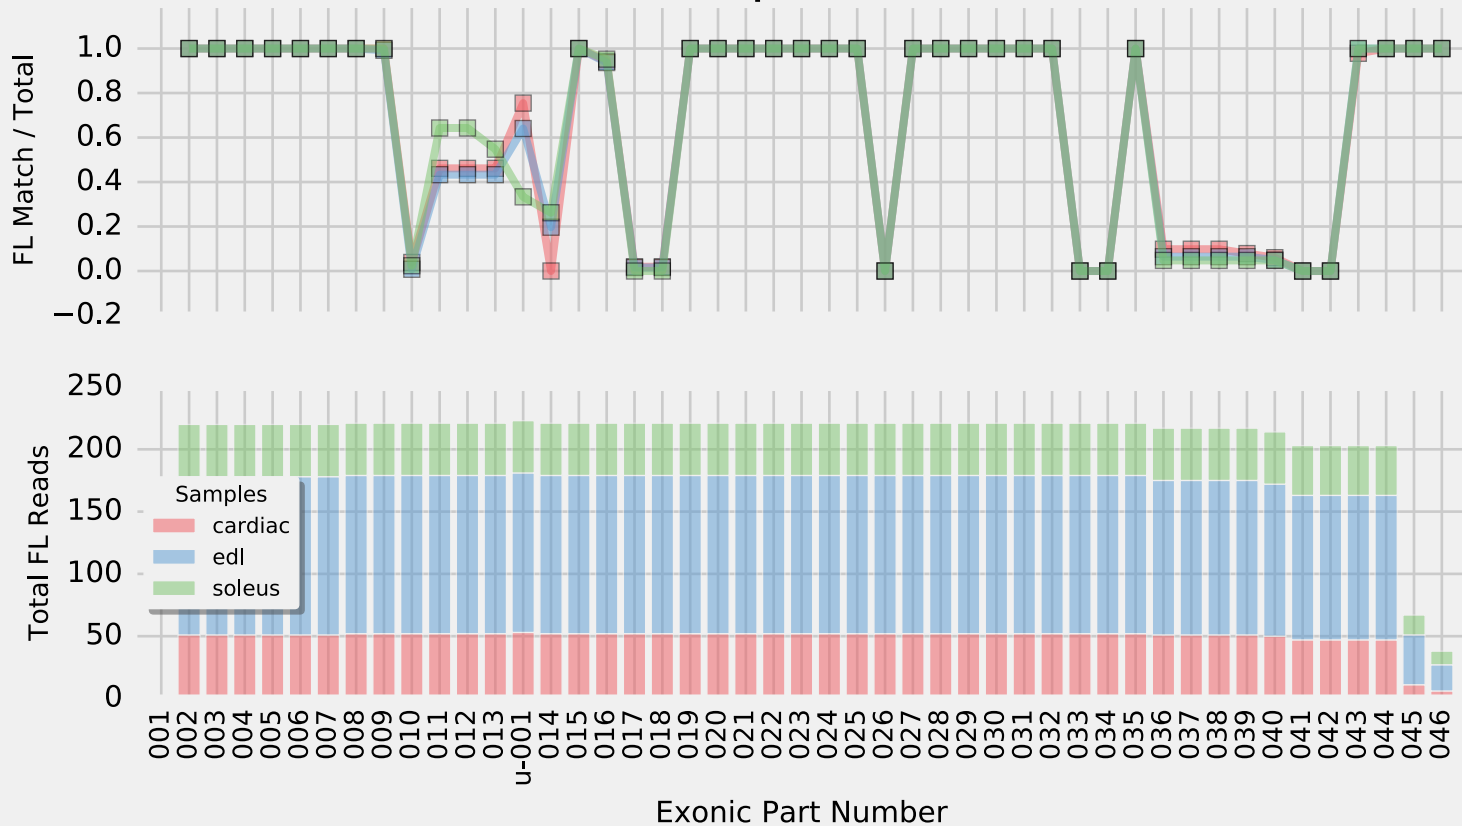

# Epg5

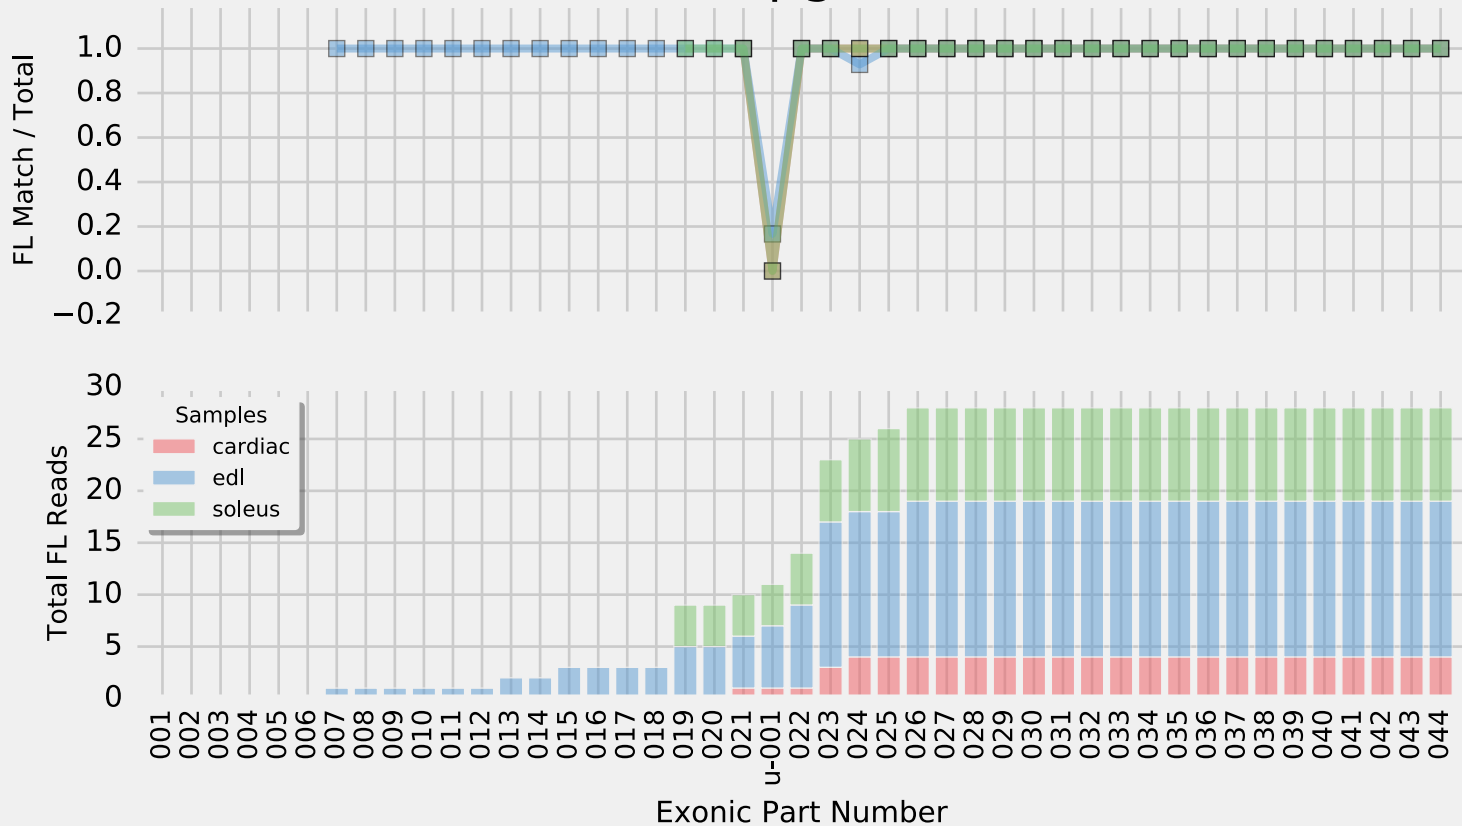

# Epm2aip1

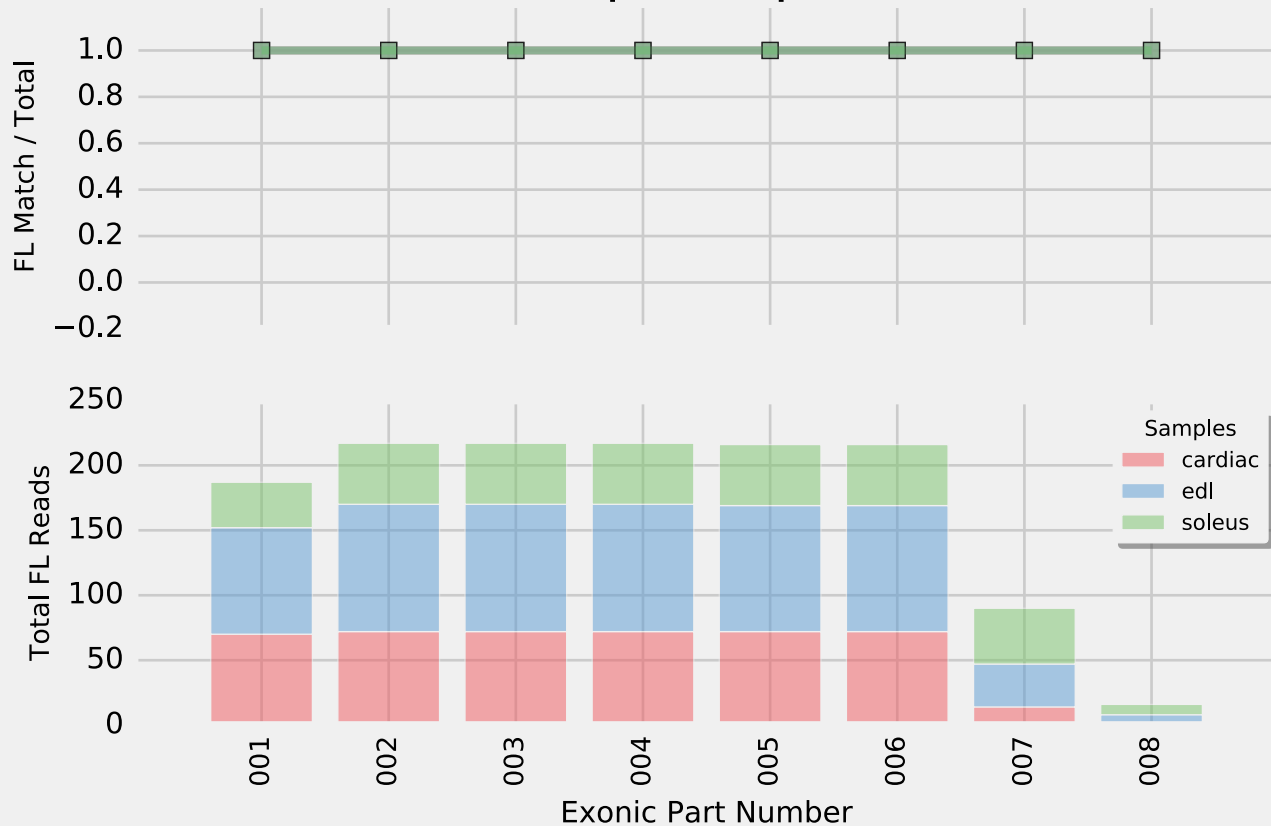

# Eps15

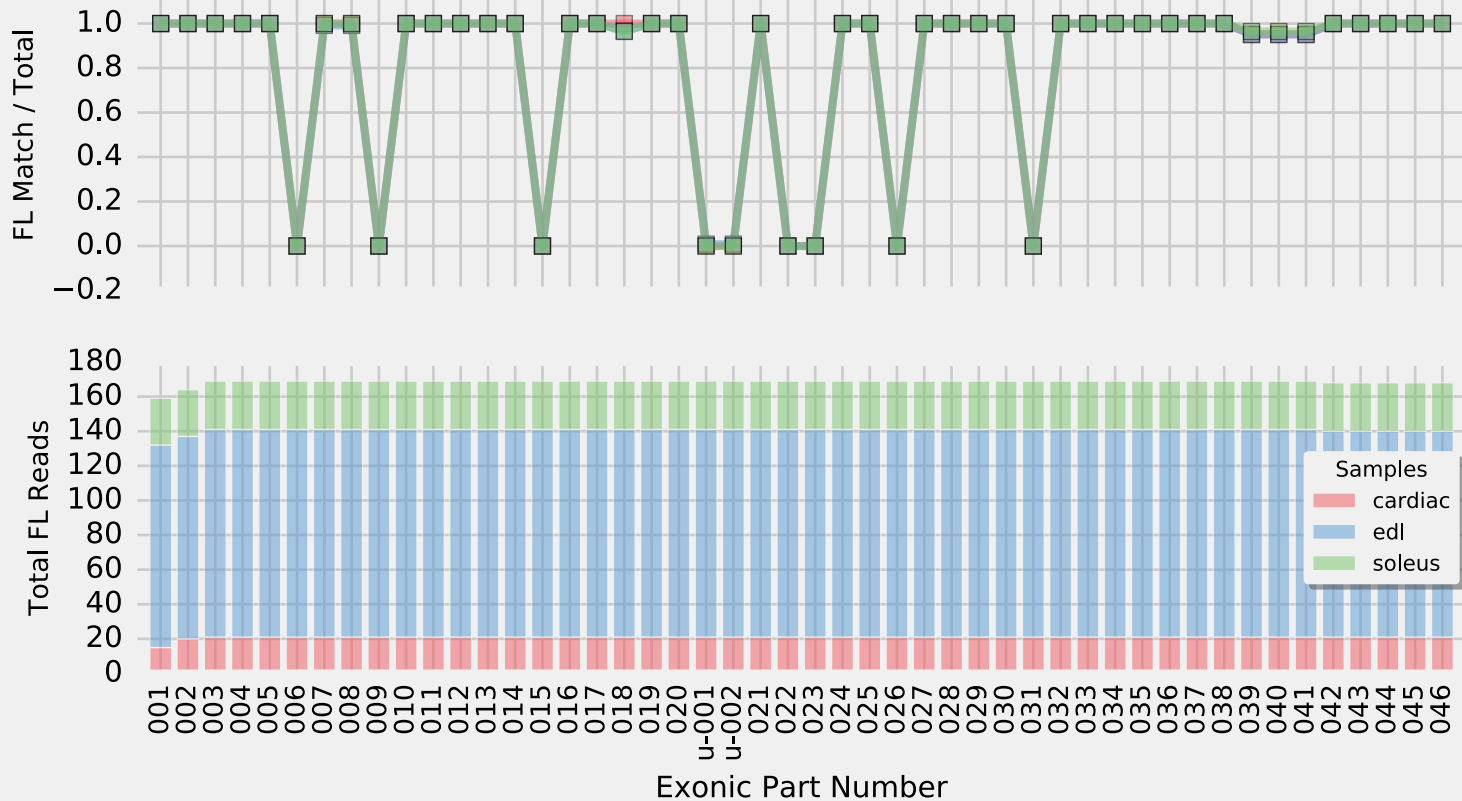

# Ept1

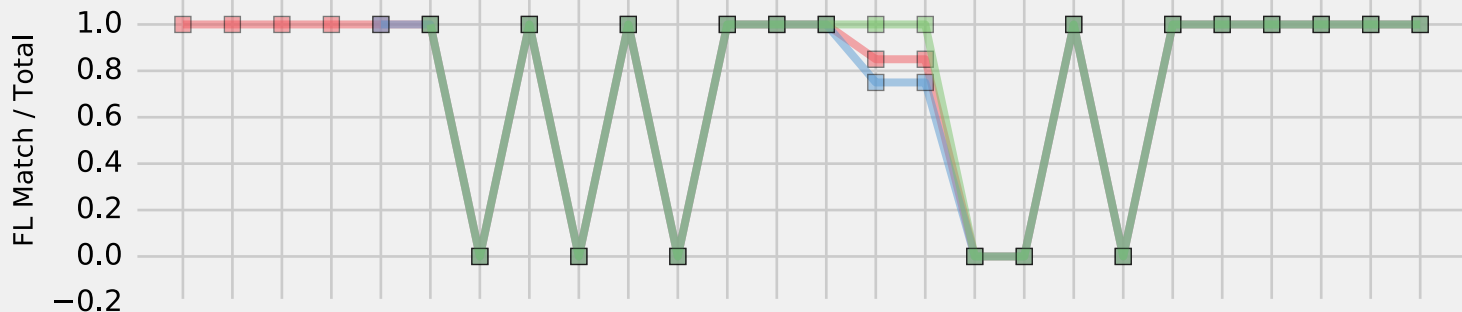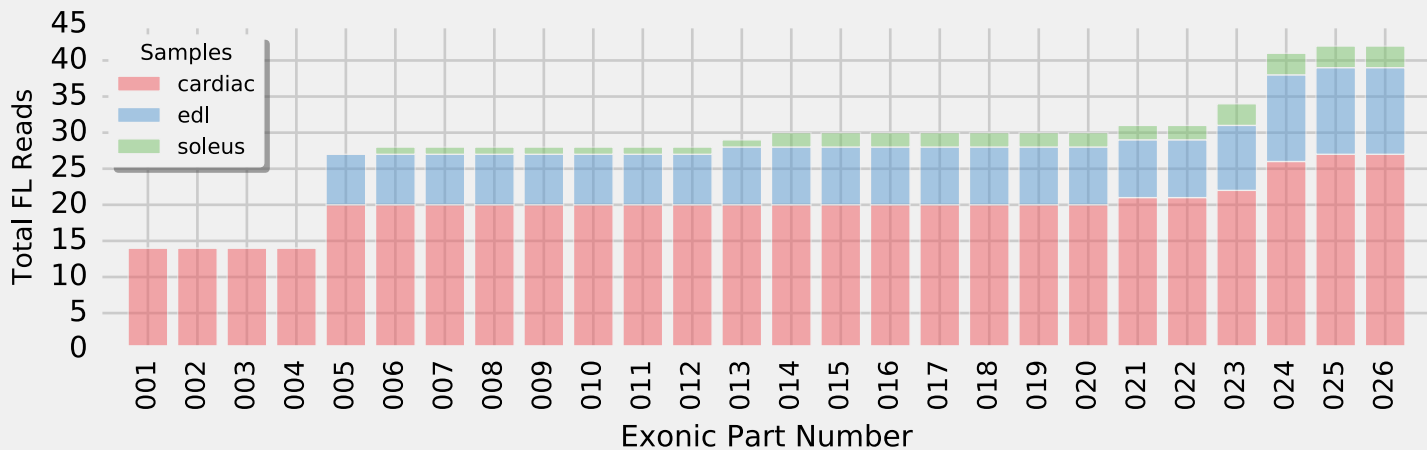



# ErbB2ip

FL Match / Total

-

Total FL Reads

Samples

cardiac  
edl  
soleus

001

002

003

004

005

006

007

008

009

010

011

012

013

014

015

016

017

018

019

020

021

022

023

024

025

026

027

028

029

030

031

032

033

034

035

Exonic Part Number

1.0  
0.8  
0.6  
0.4  
0.2  
0.0  
-0.2

70  
60  
50  
40  
30  
20  
10  
0

# ErbB3

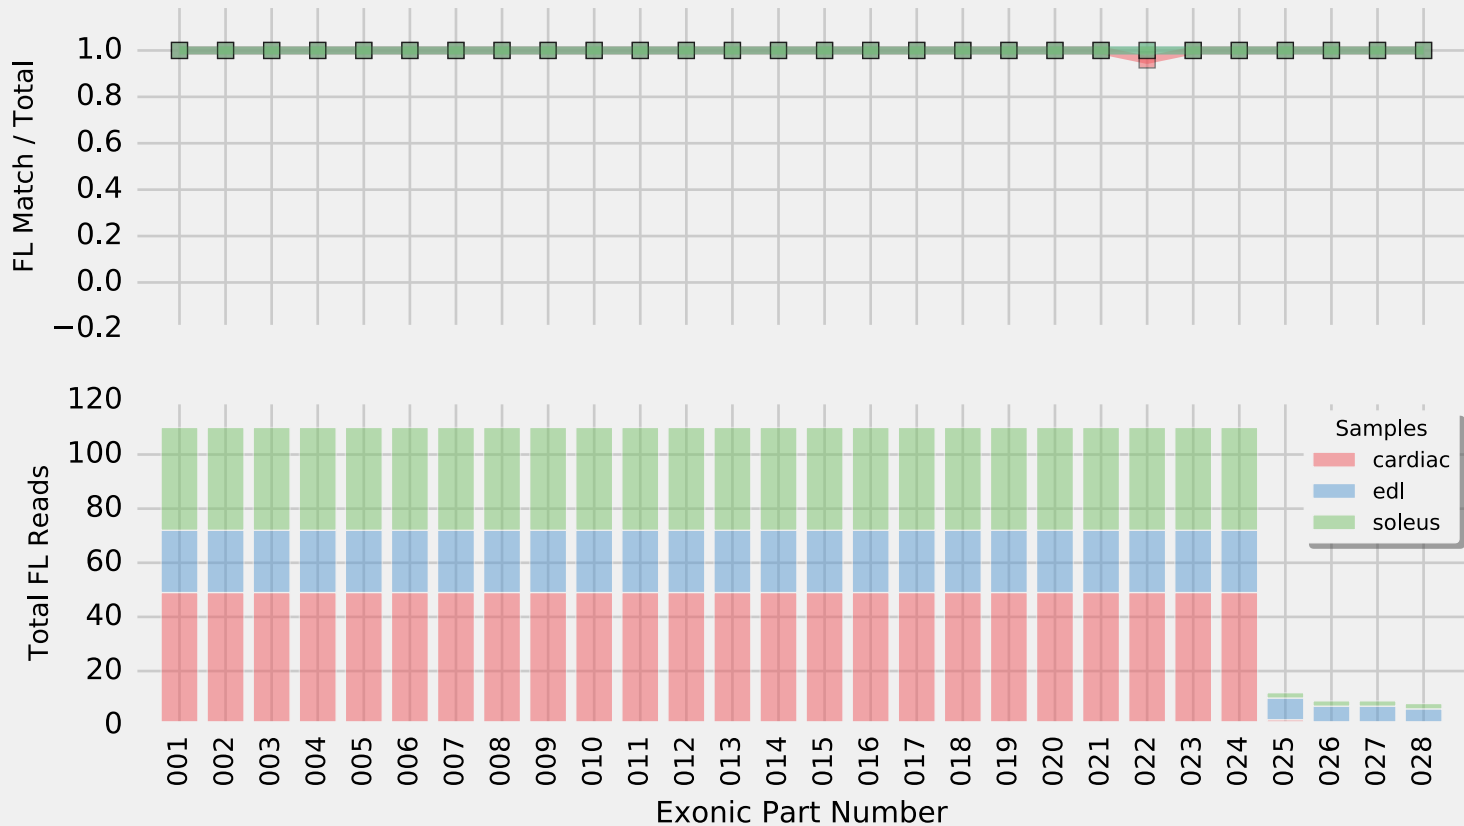

# Ercc6l2

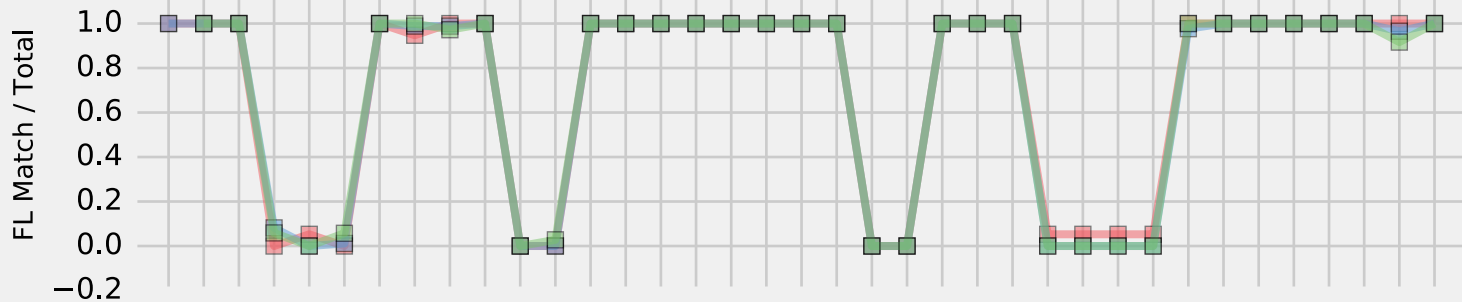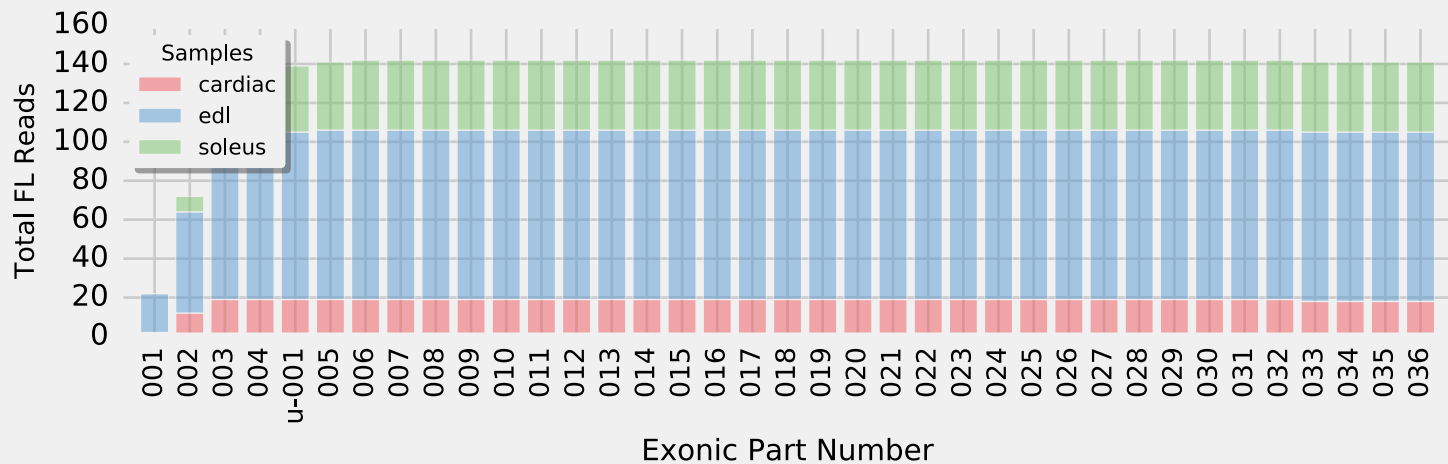

# Esrr1

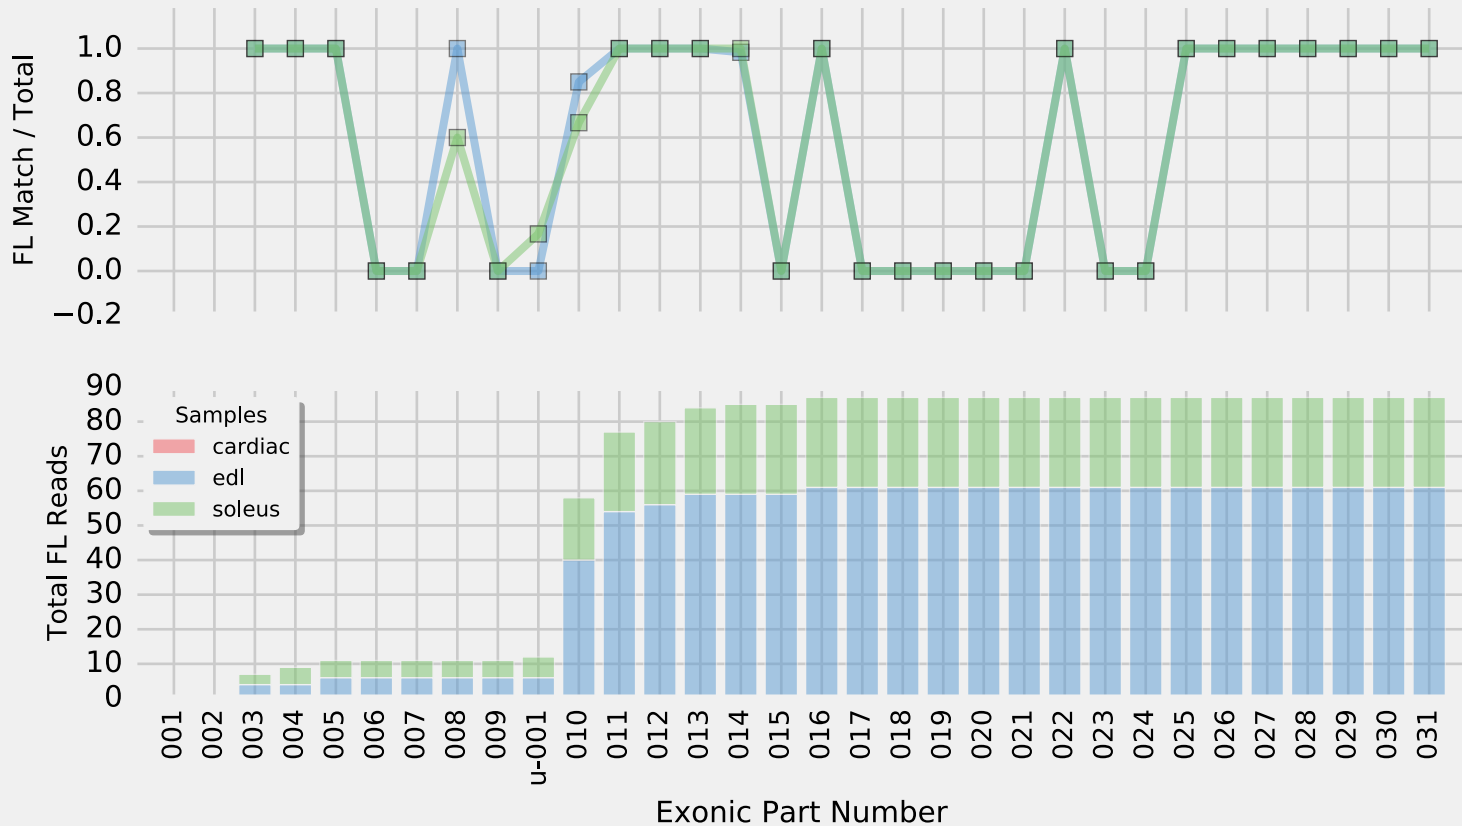

# Esrrg

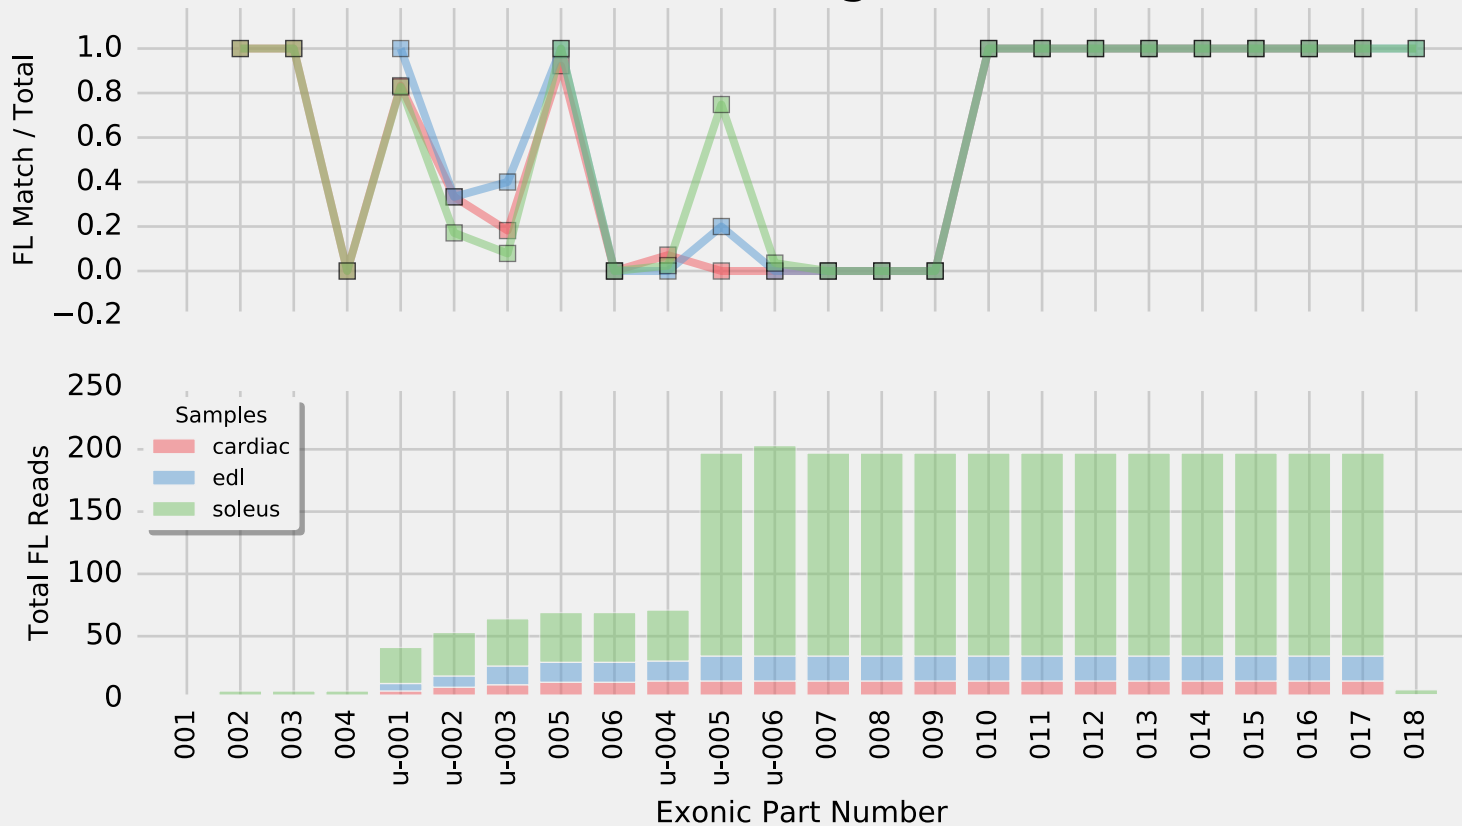

# Esyt2

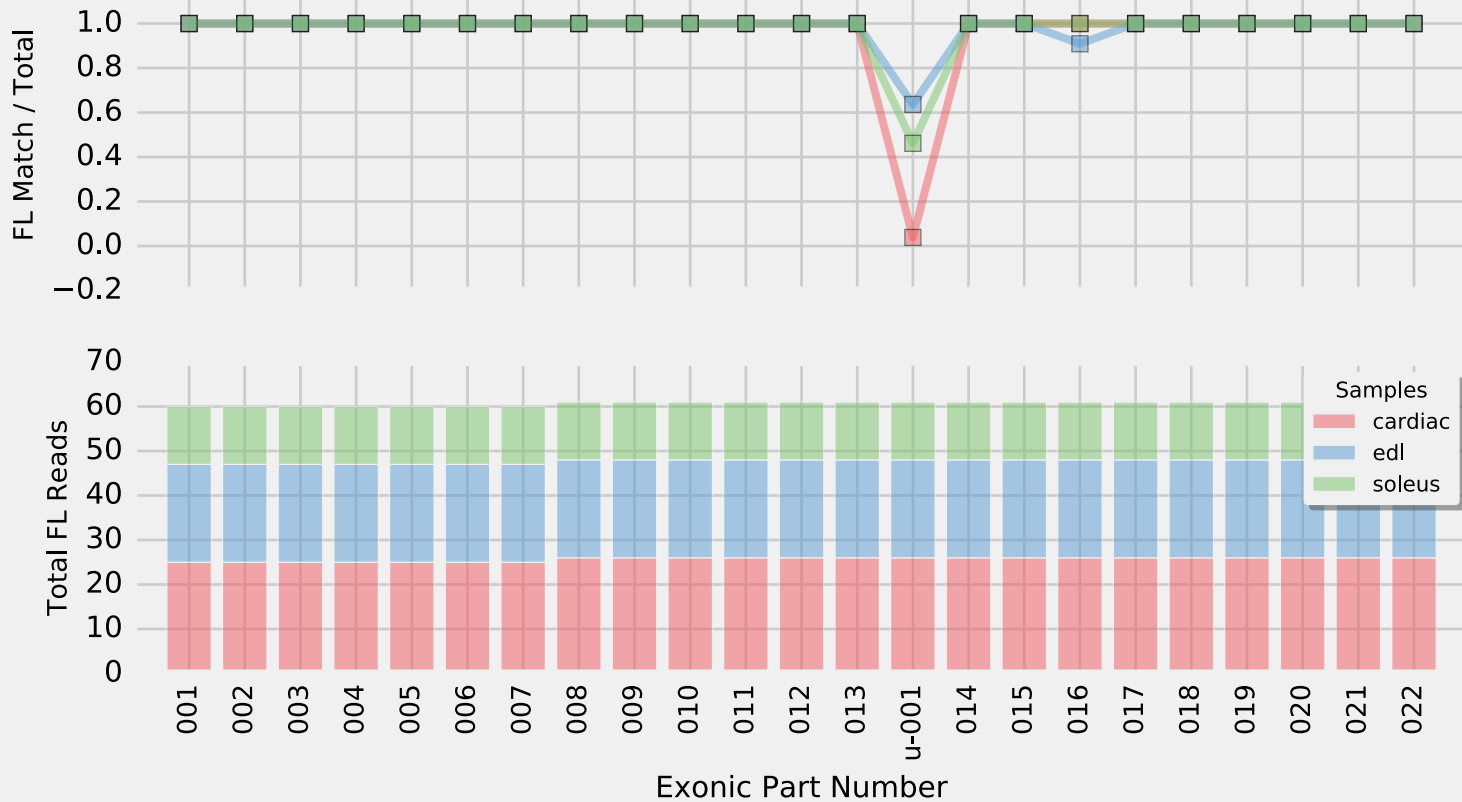

# EtI4

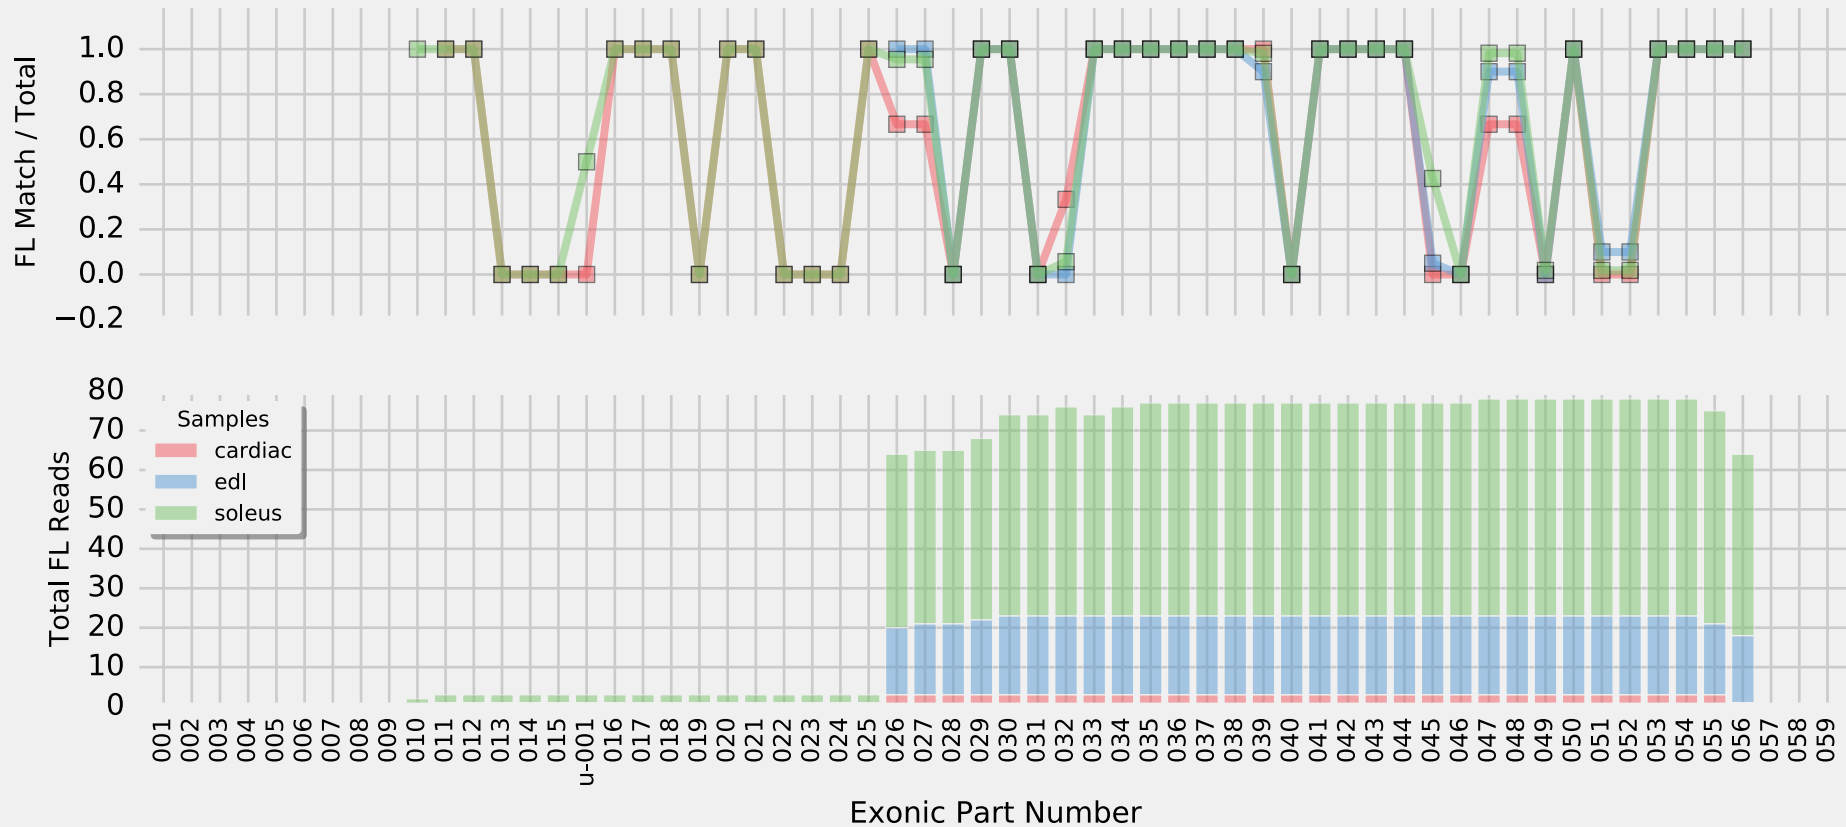

# Etnk1

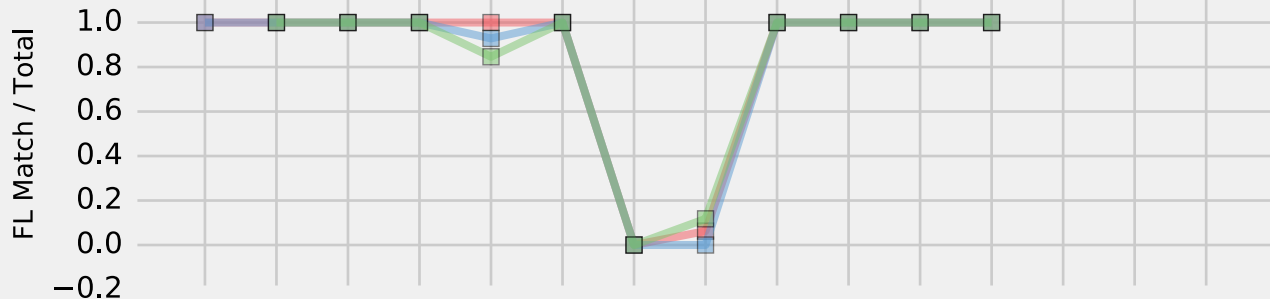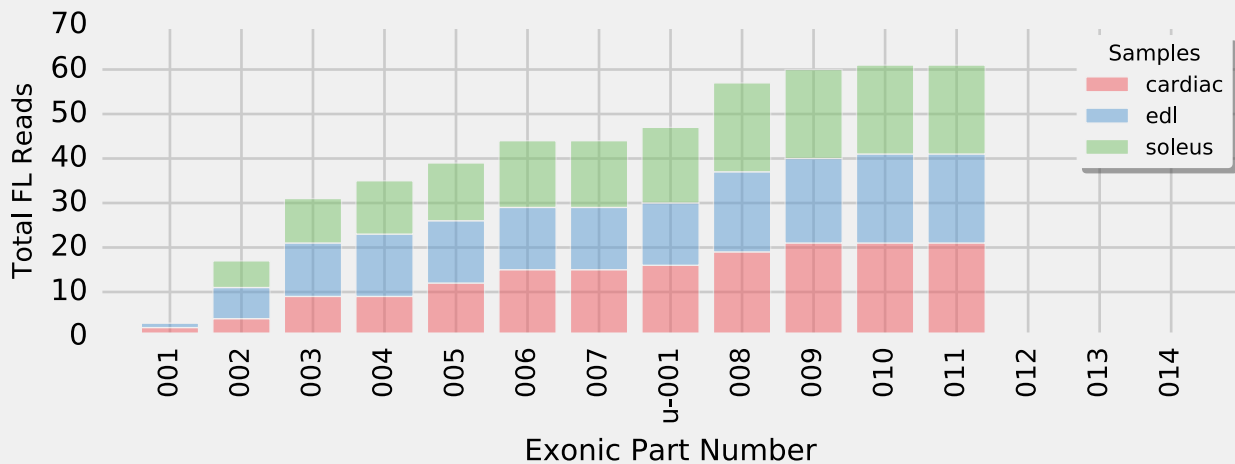



# Etohi1

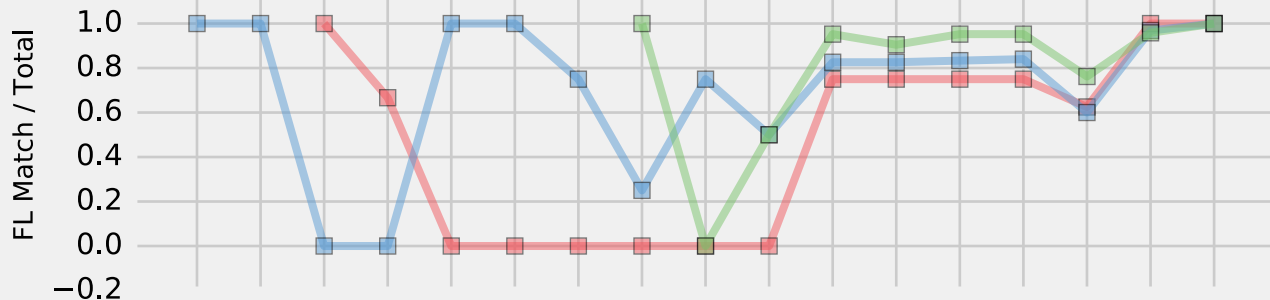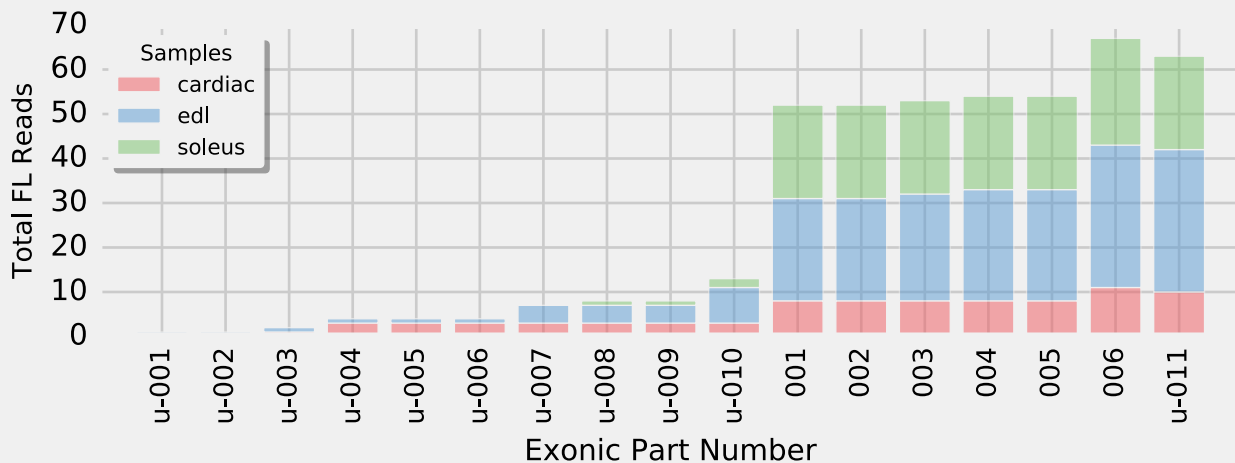

# Ewsr1

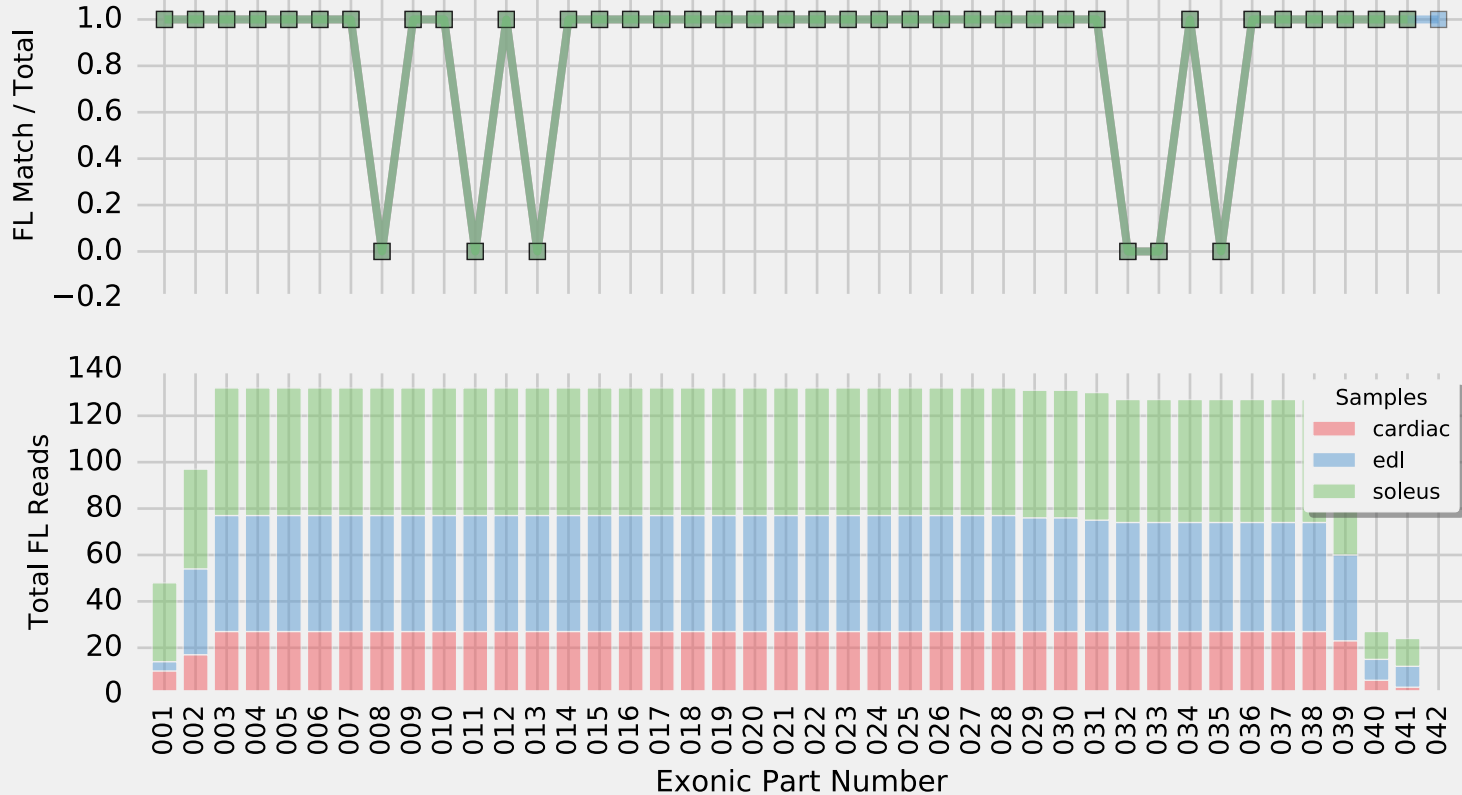

# Exoc6b

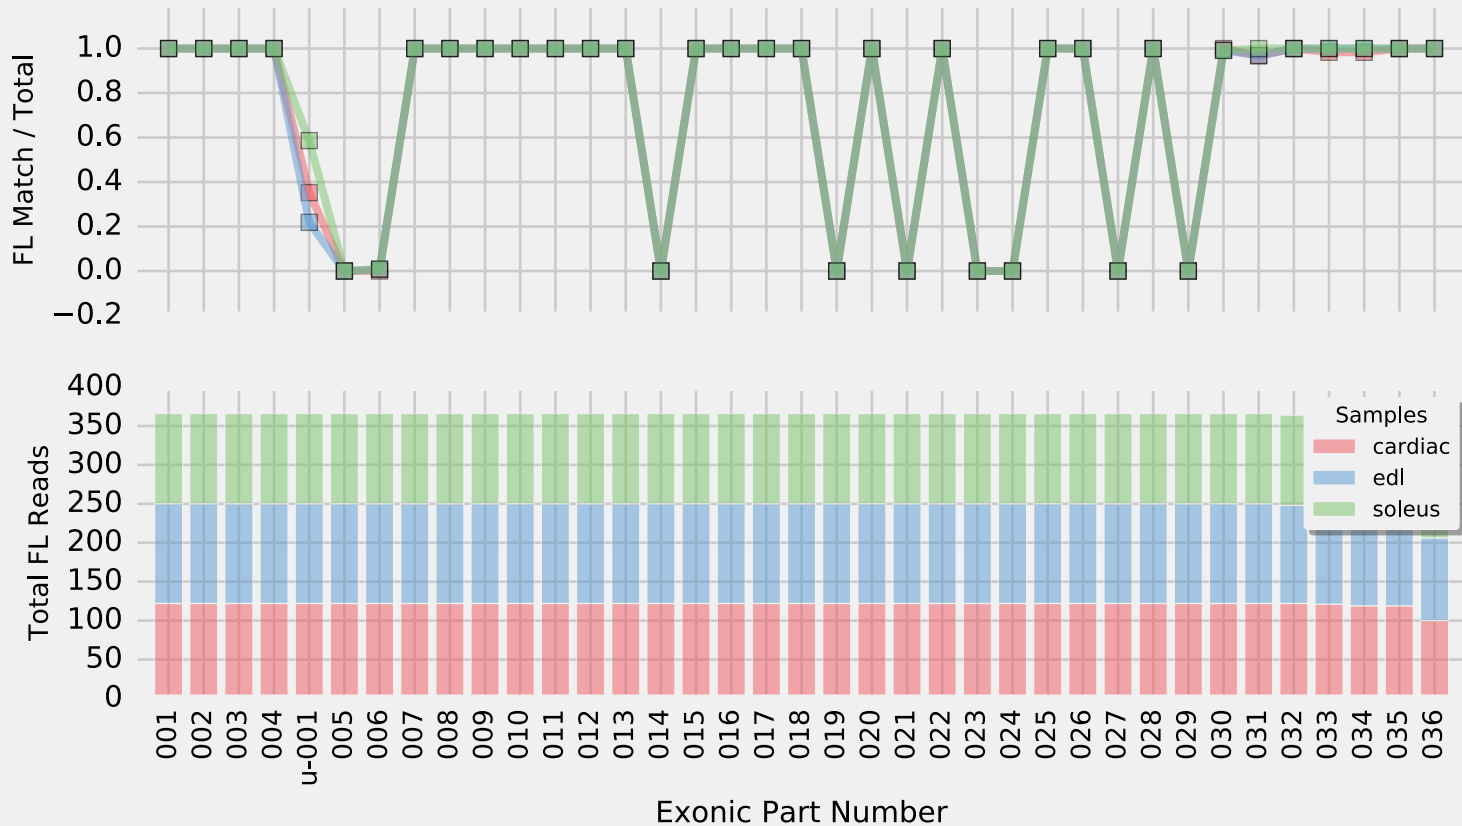

# Extl3

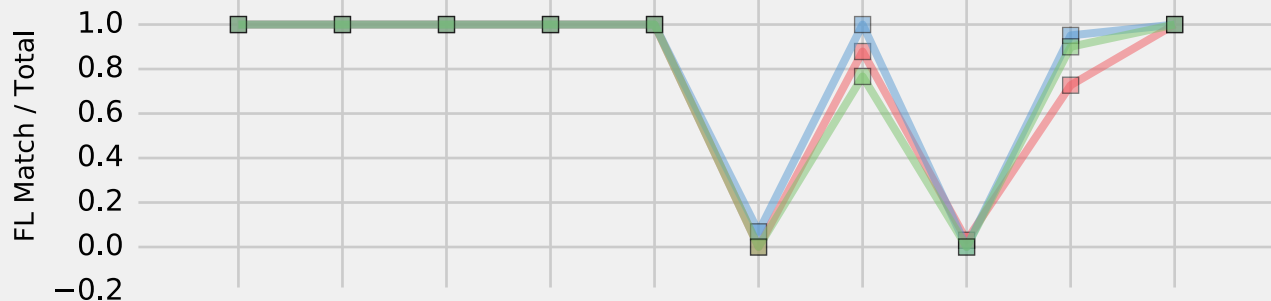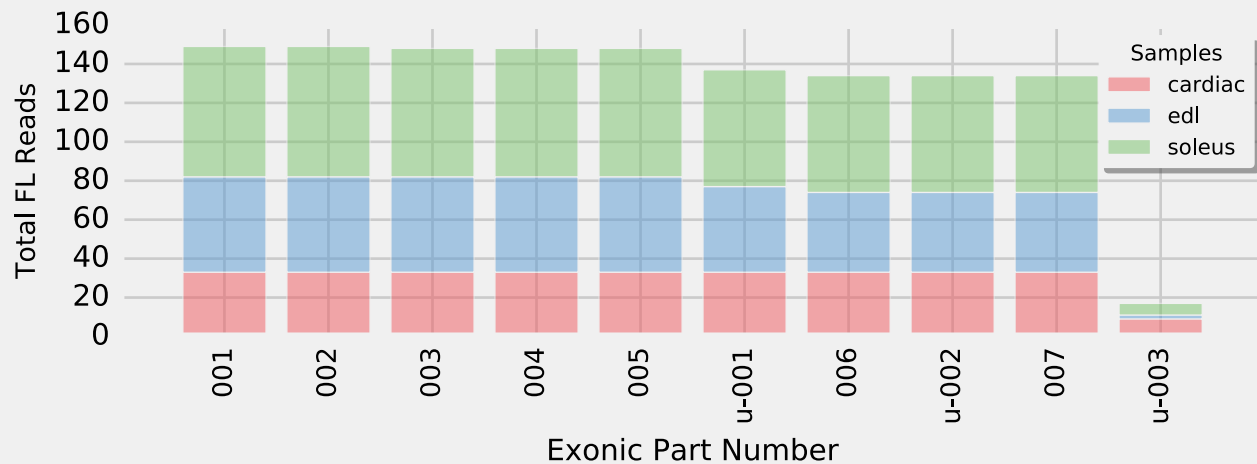

# Eya3

FL Match / Total

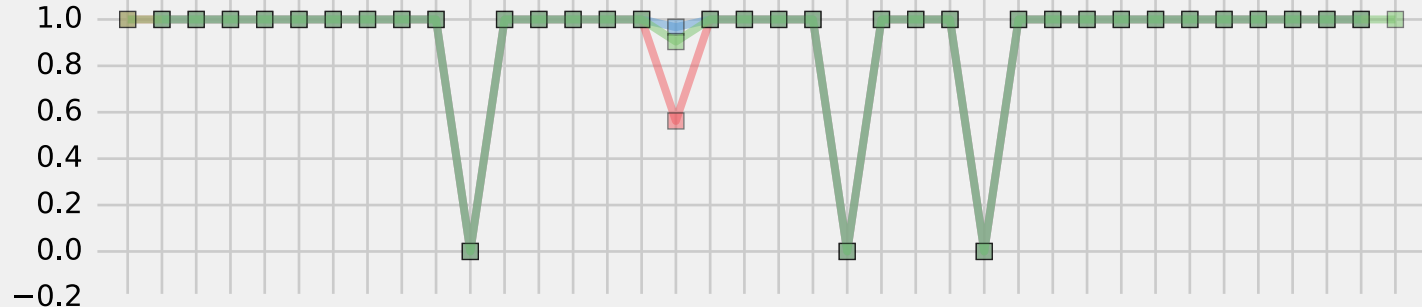

Total FL Reads

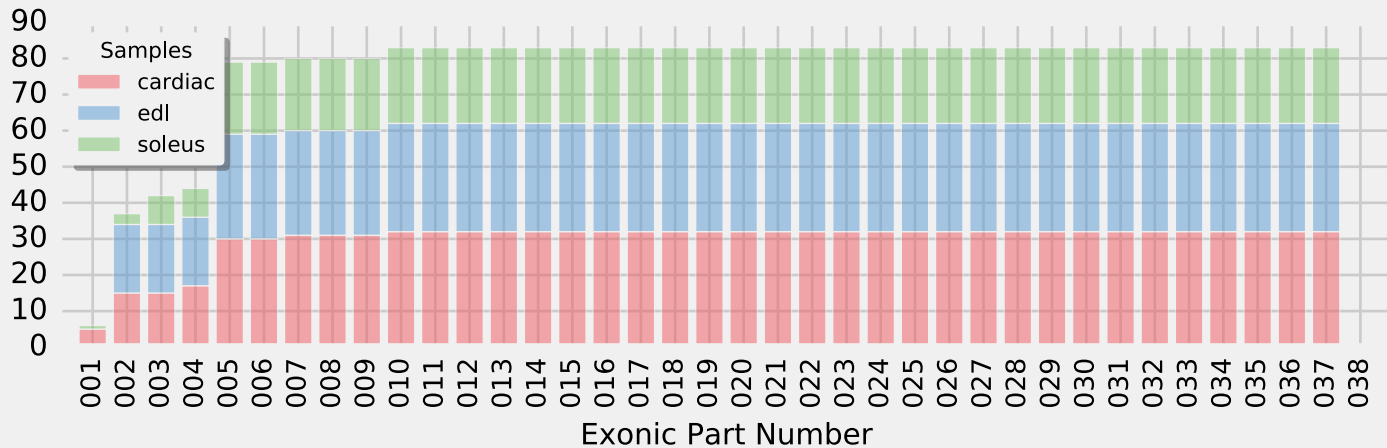

# Eya4

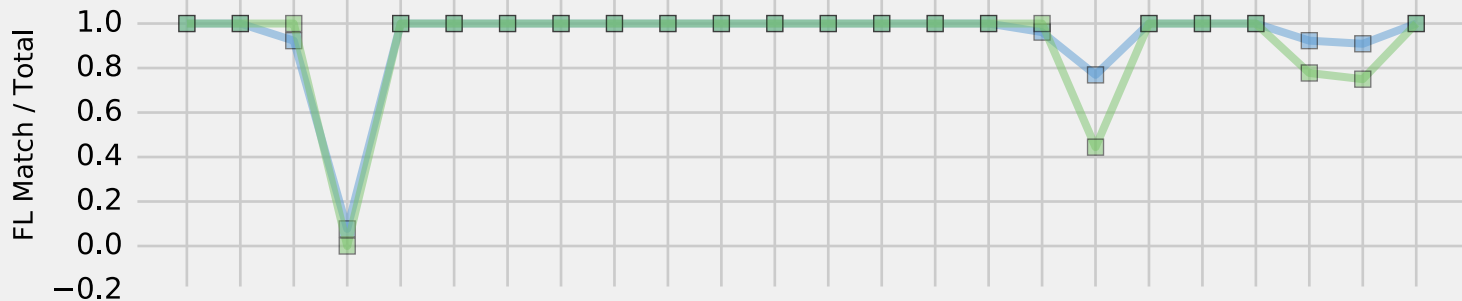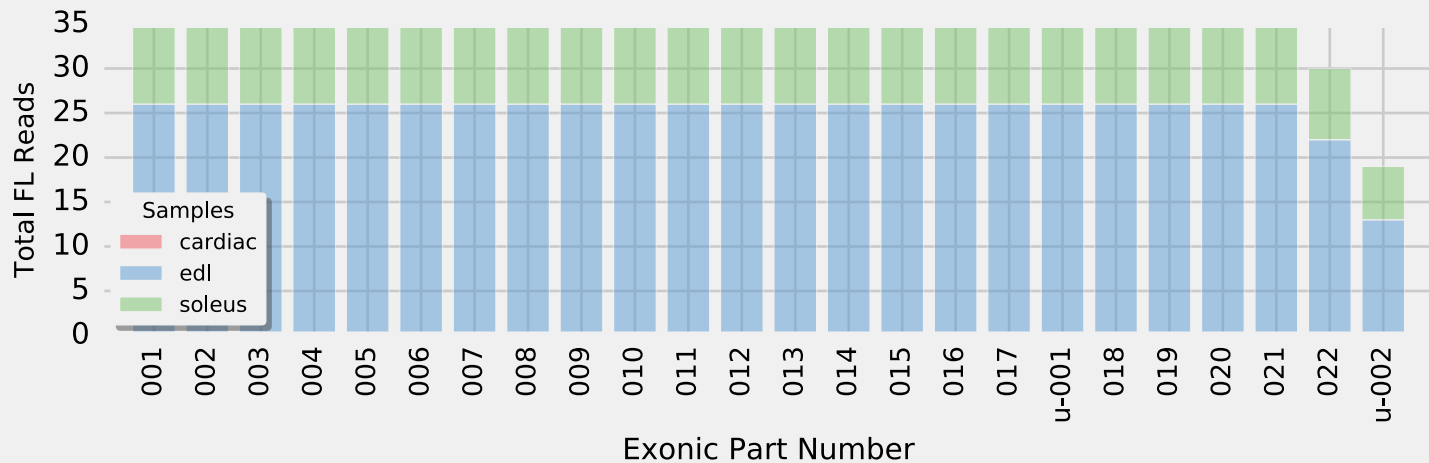

# Fam126a

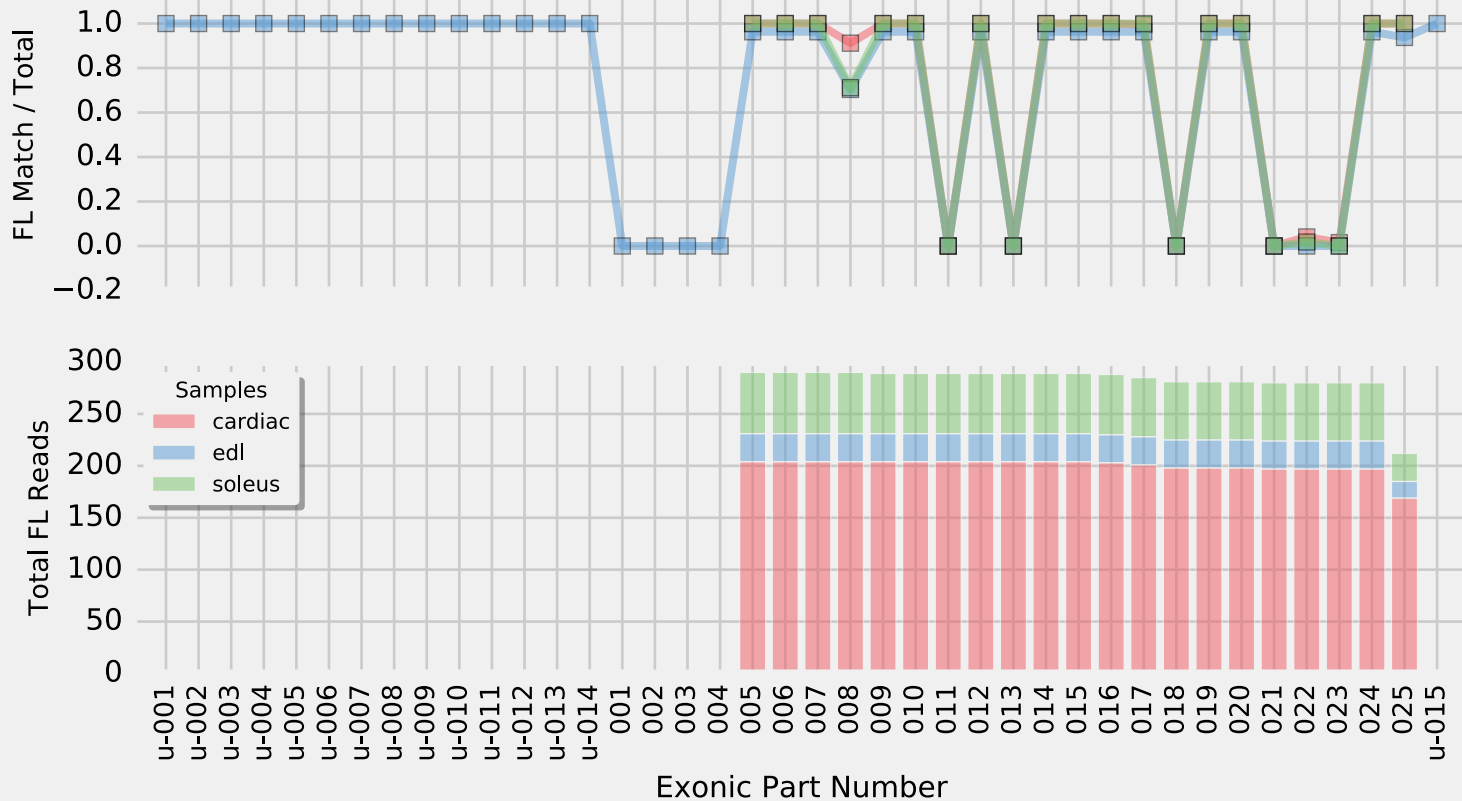

# Fam129a

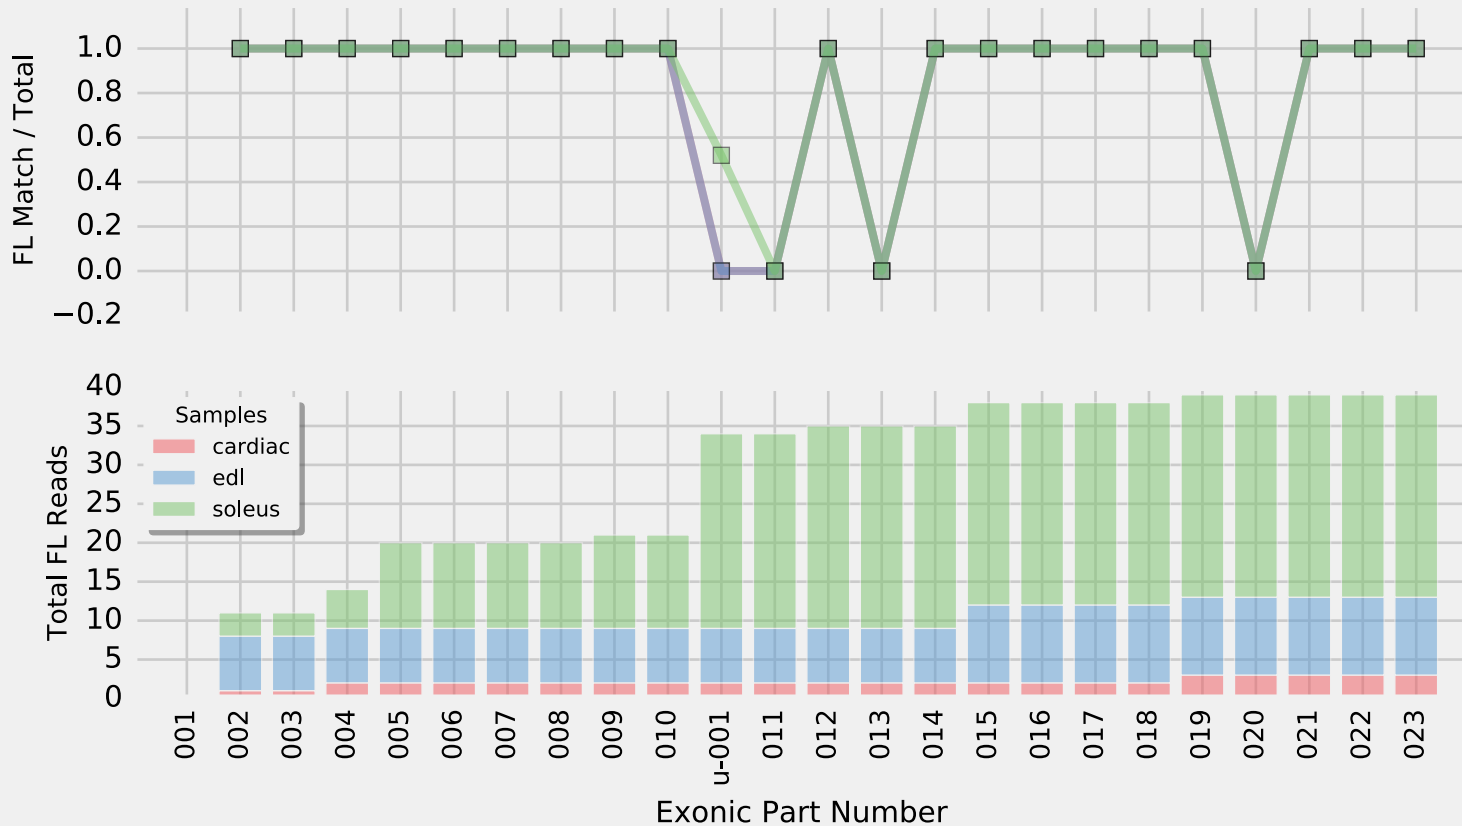



# Fam135a

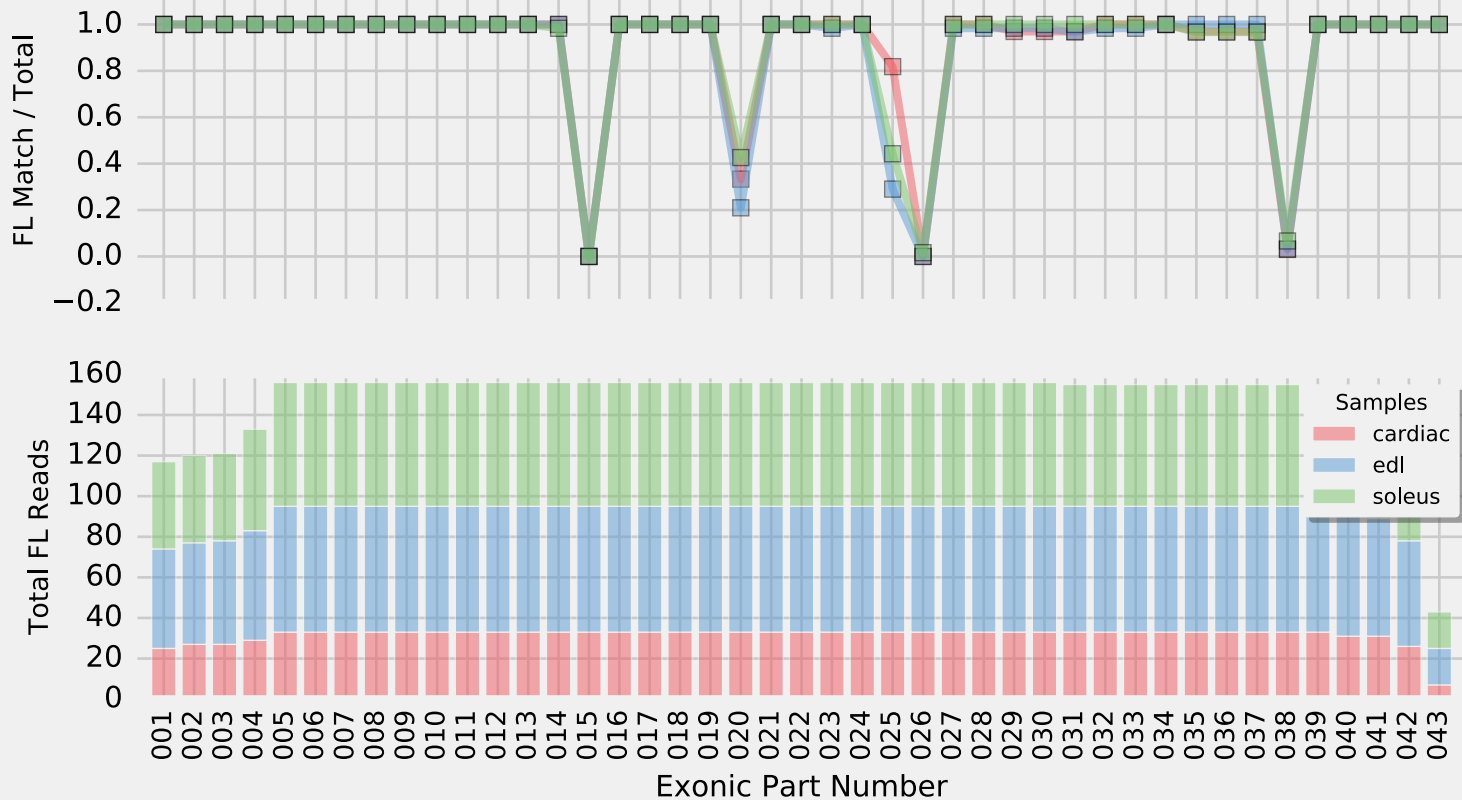

# Fam168a

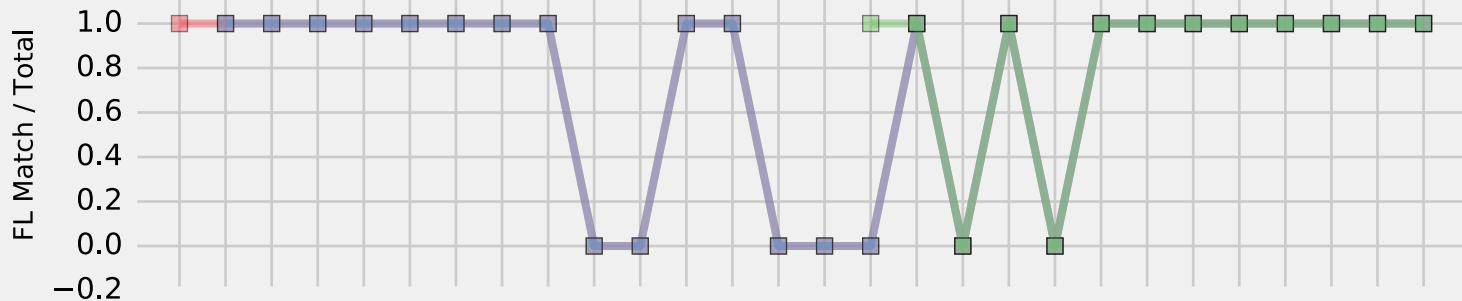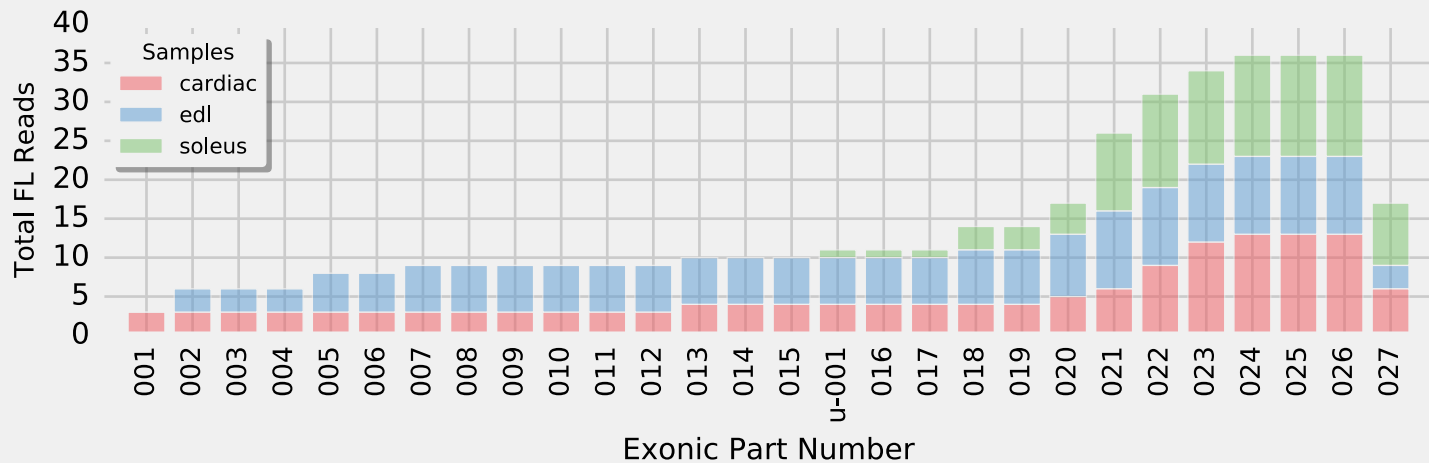

# Fam178a

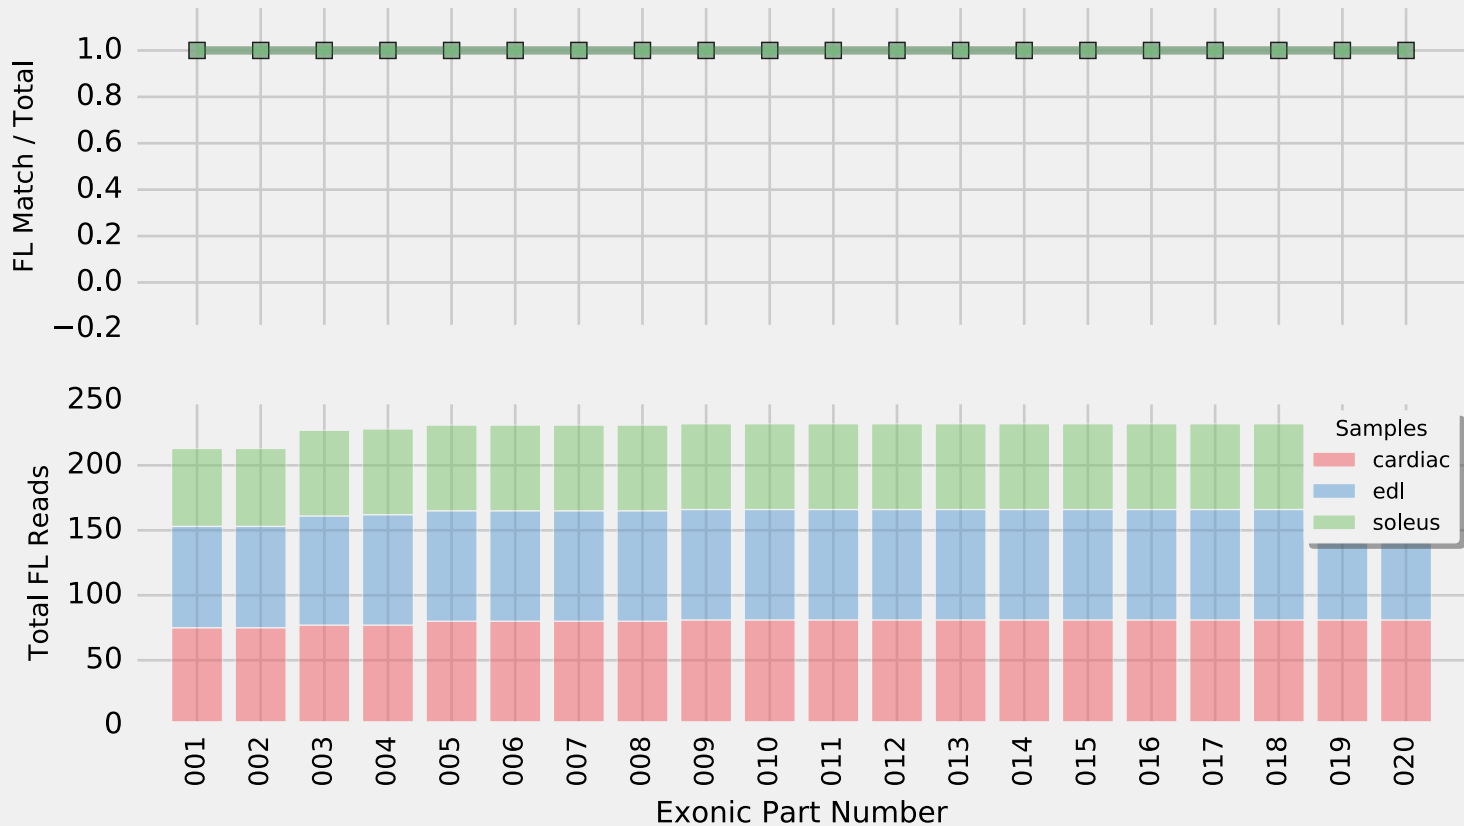

# Fam214a

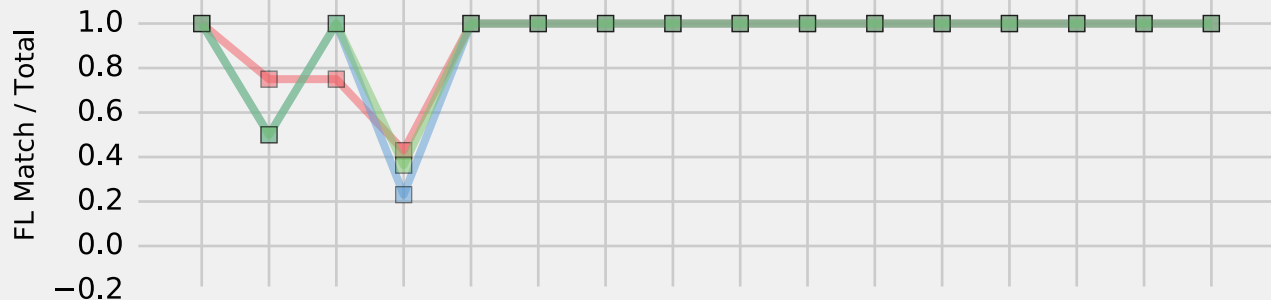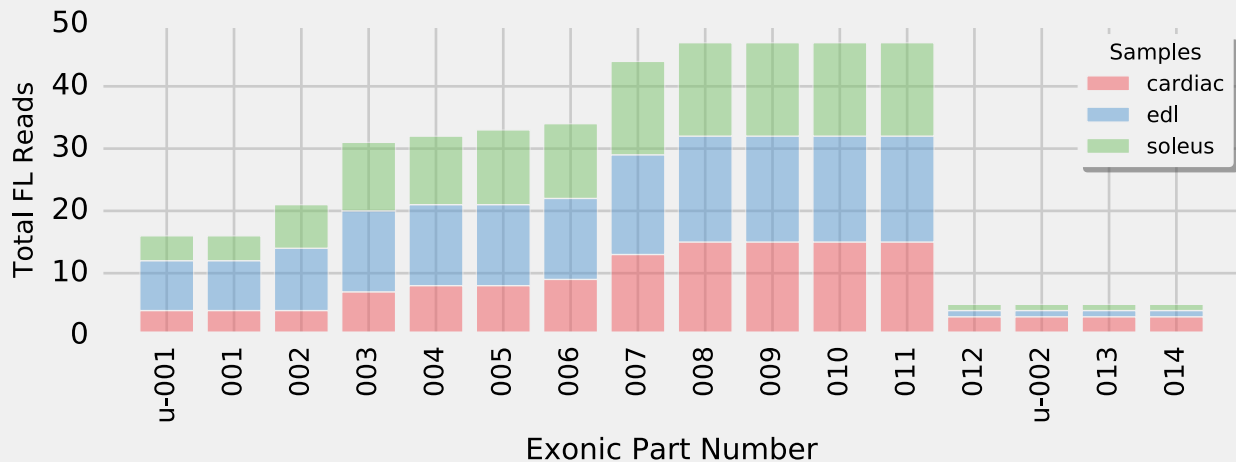

# Fam65b

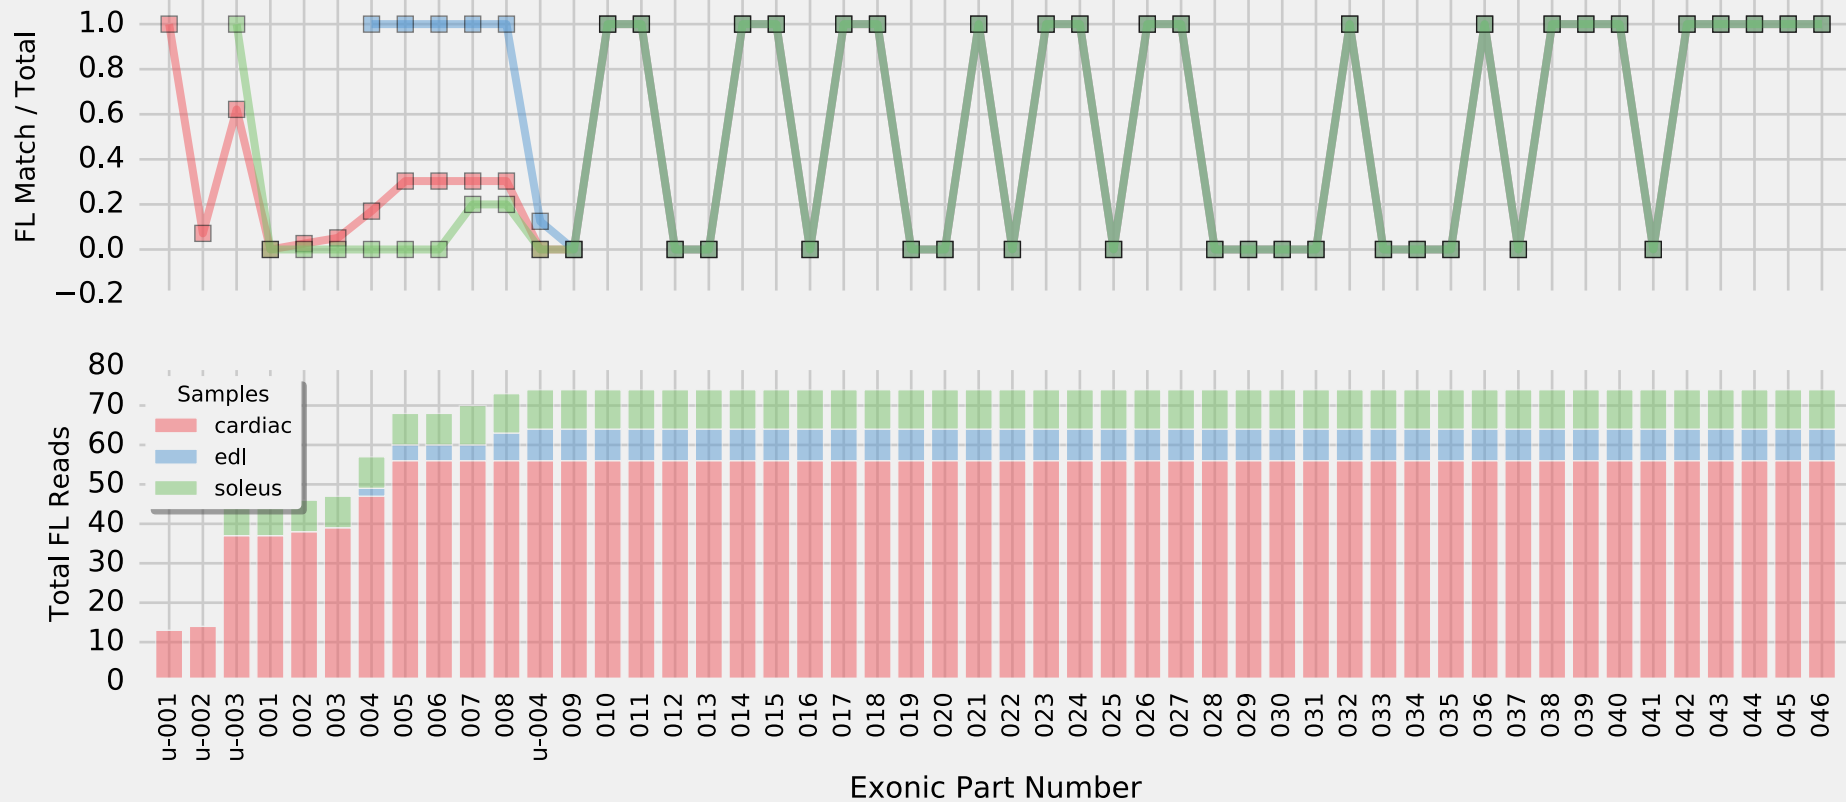

# Fbn1

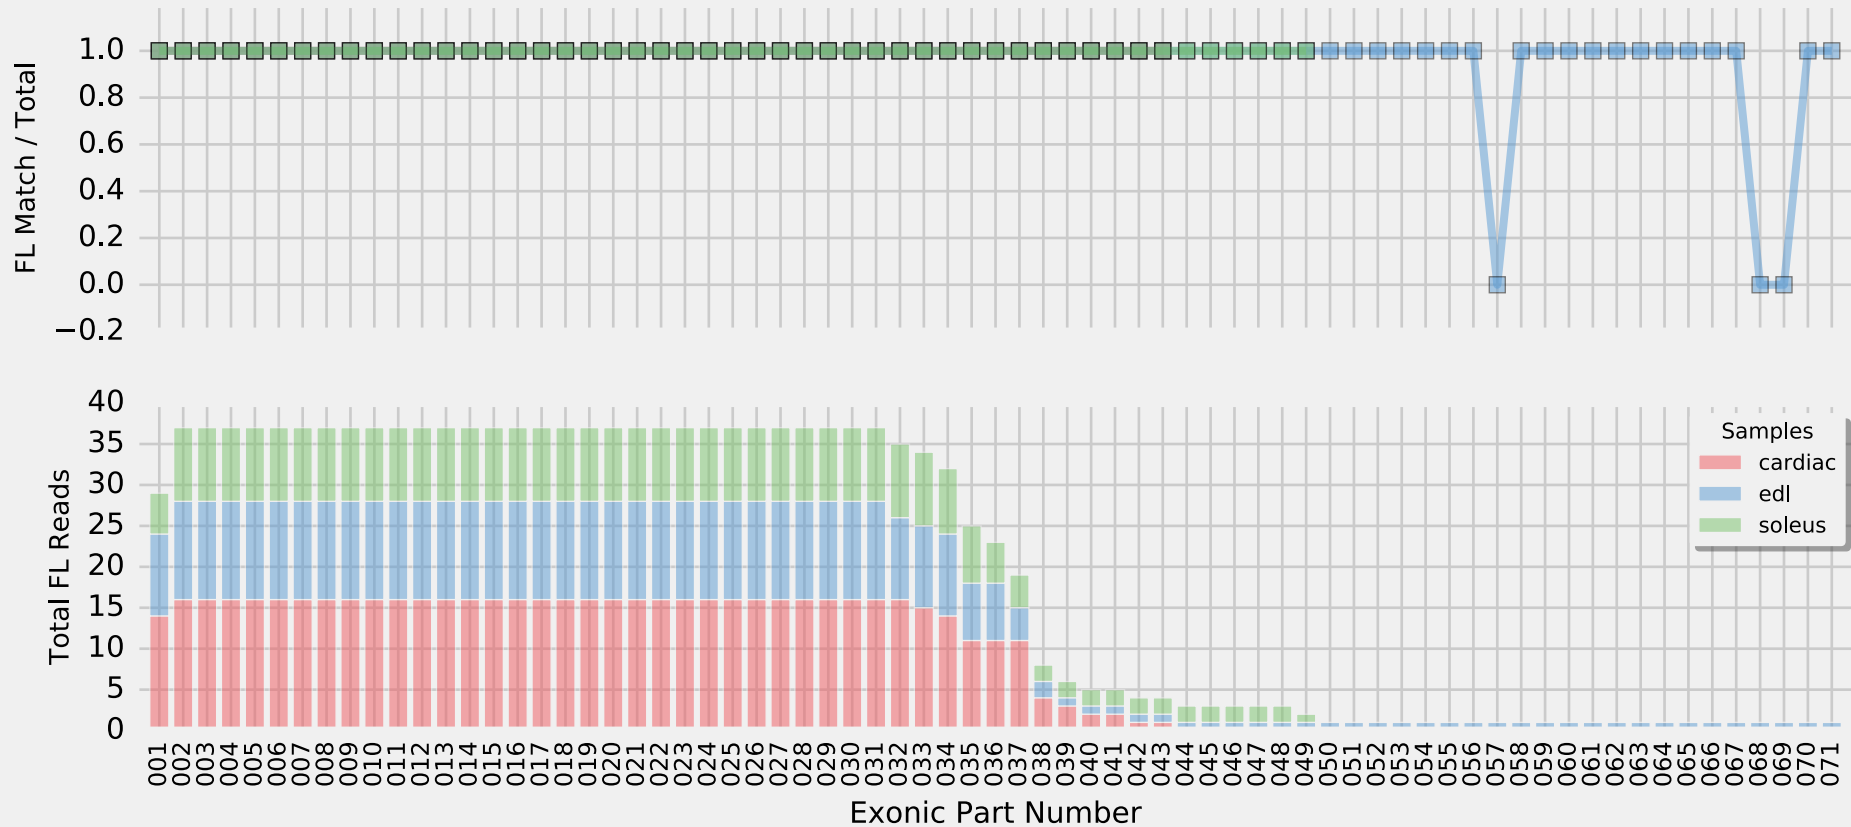

# Fbxo40

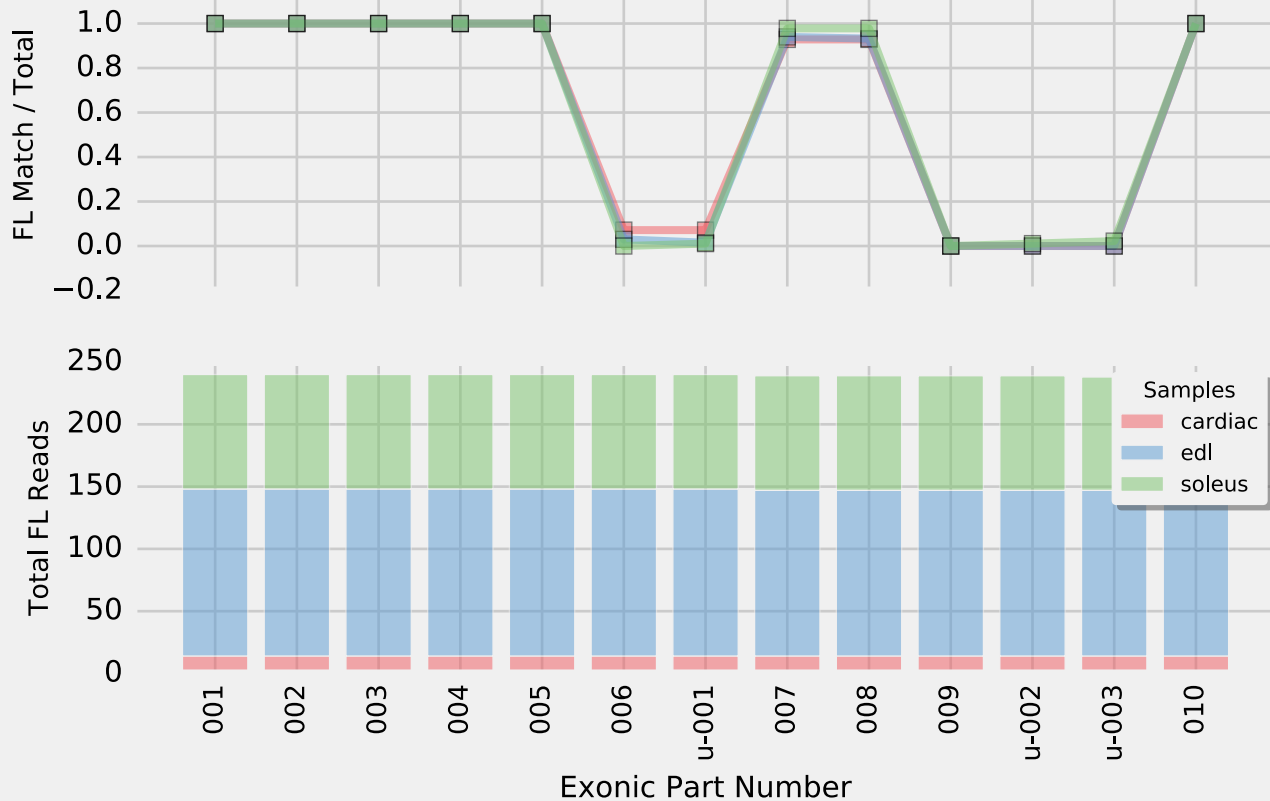

# Fem1a

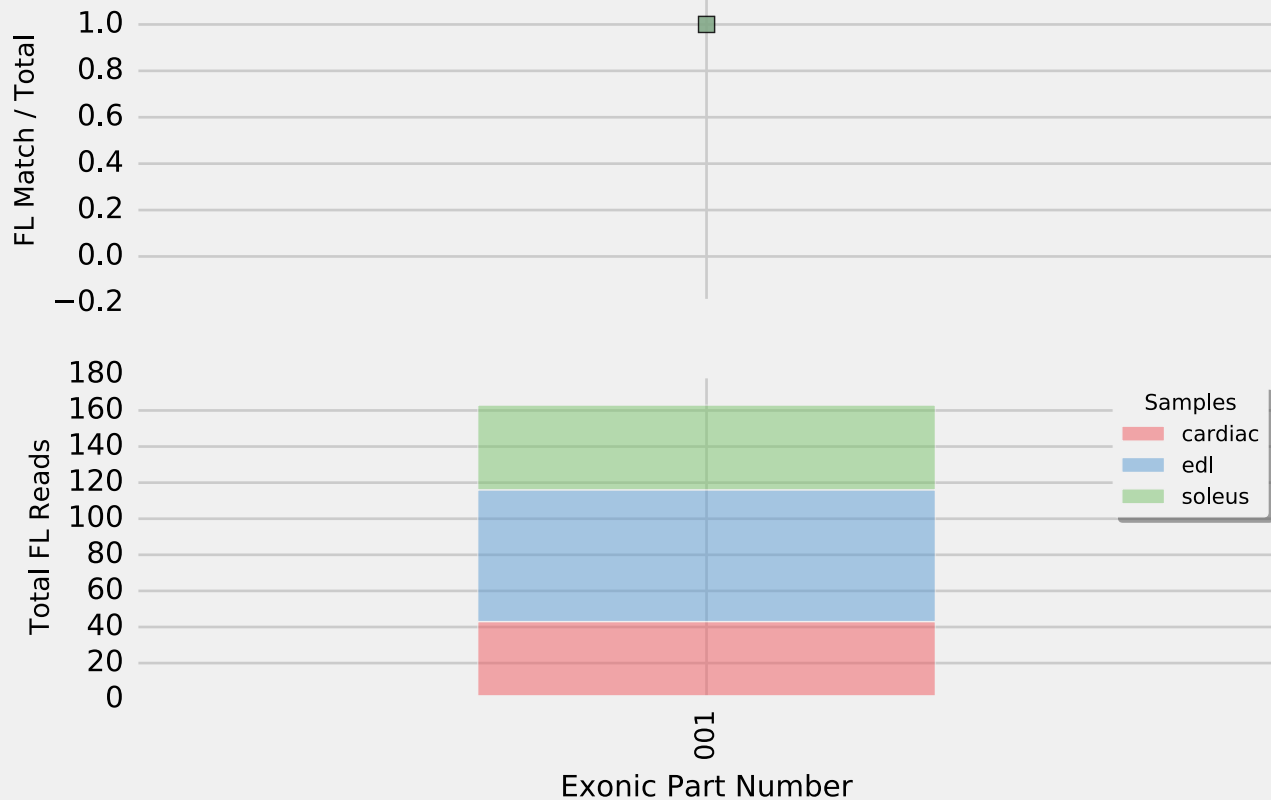



# Fem1b

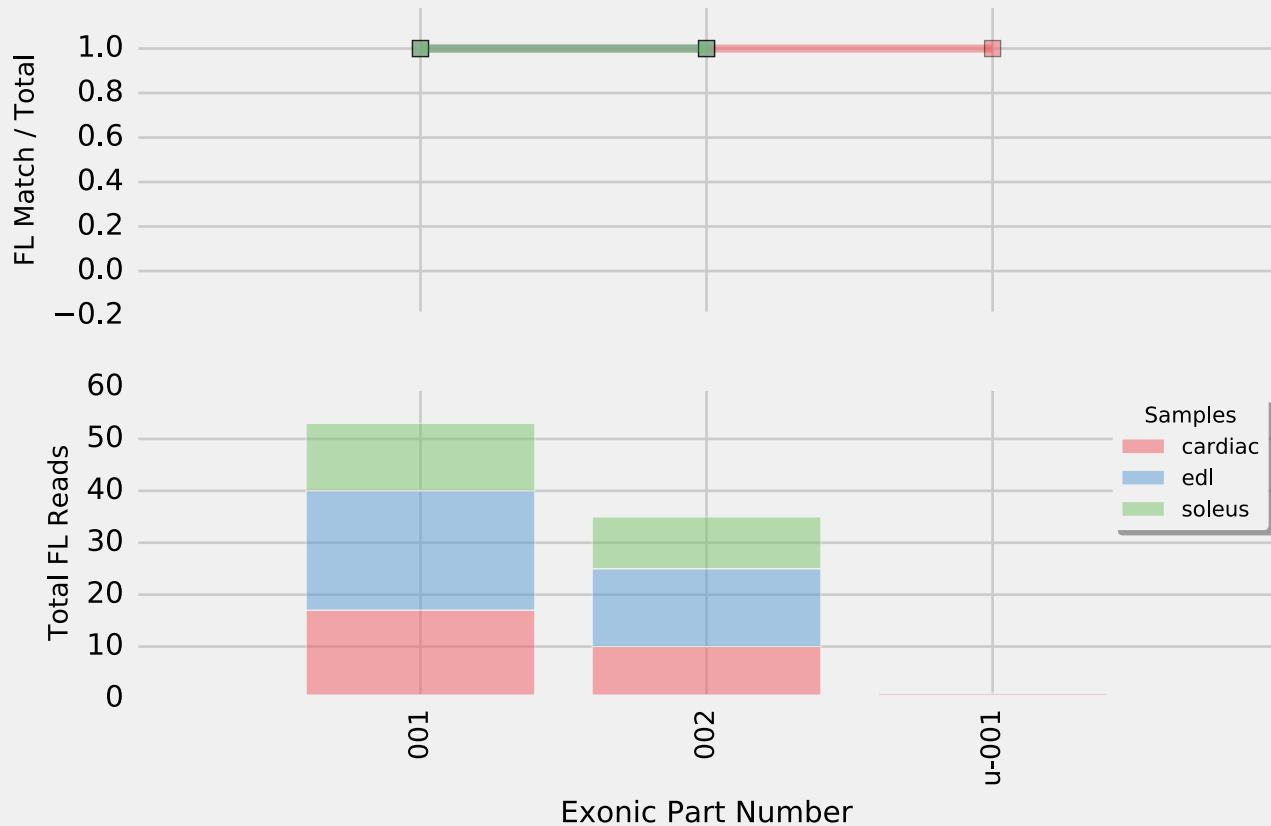

# Fhod3

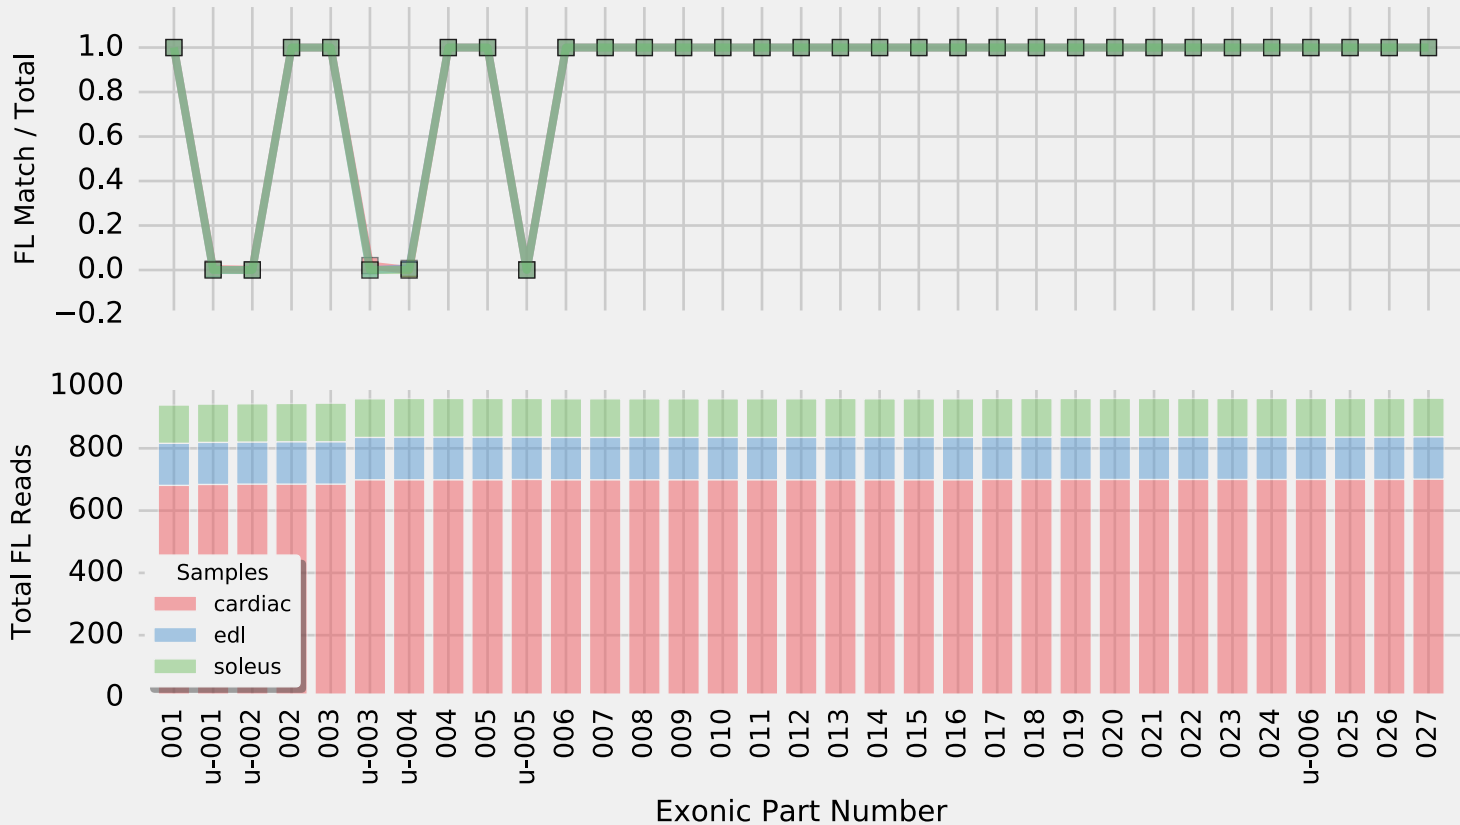

# Filip1l

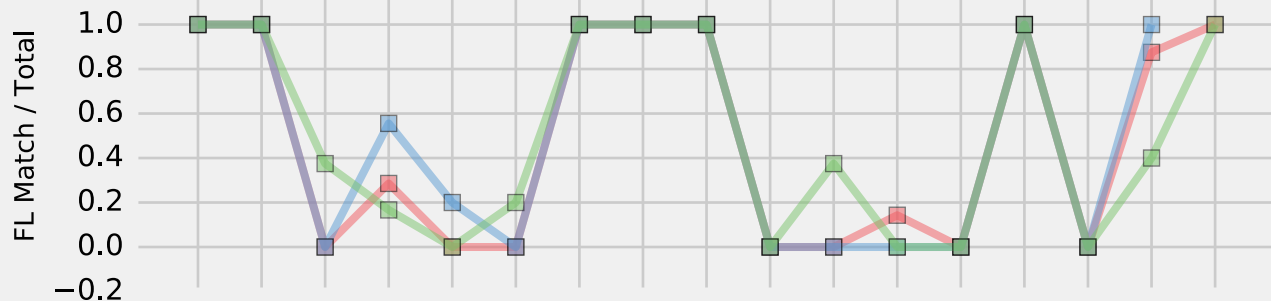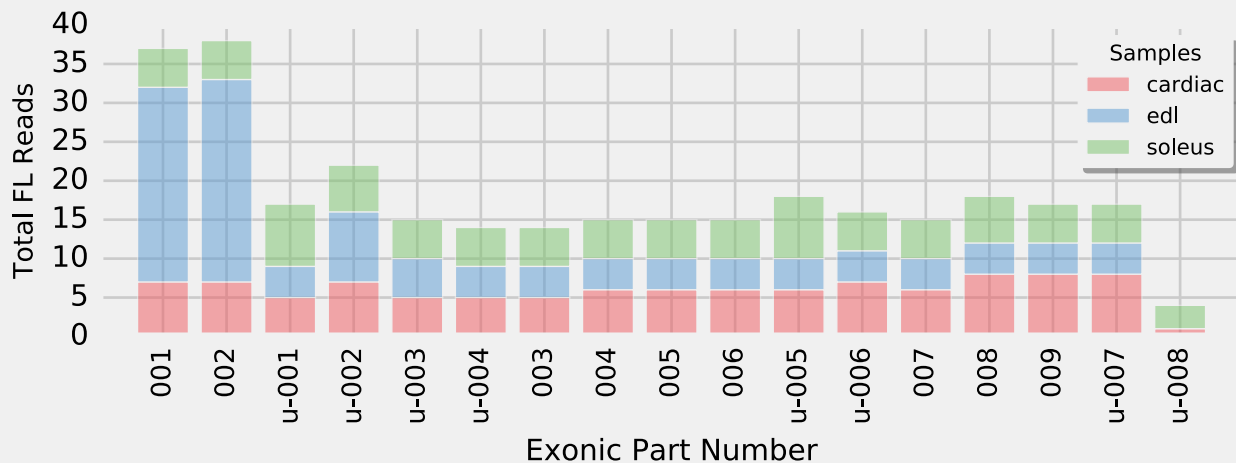

# Flna

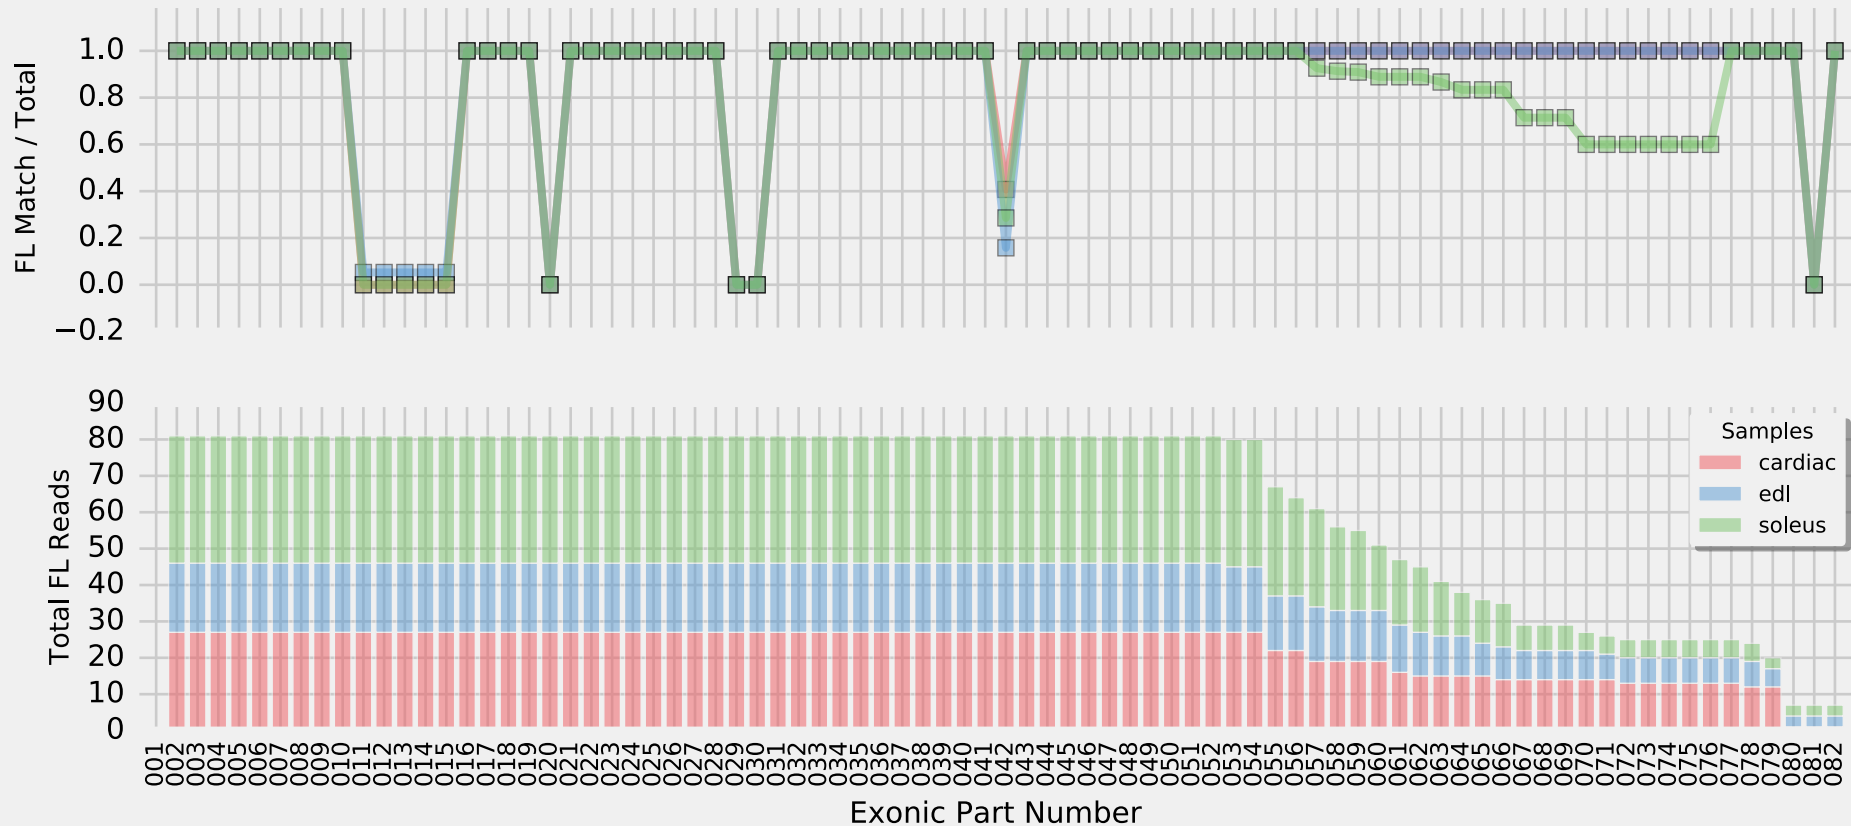

# FInc

FL Match / Total

1.0  
0.8  
0.6  
0.4  
0.2  
0.0  
-0.2

Total FL Reads

1600  
1400  
1200  
1000  
800  
600  
400  
200  
0

Samples  
cardiac  
edl  
soleus

u-001  
001  
002  
003  
004  
005  
006  
007  
008  
009  
010  
011  
012  
013  
014  
015  
016  
017  
018  
019  
020  
021  
022  
023  
024  
025  
026  
027  
028  
029  
030  
031  
032  
033  
034  
035  
036  
037  
038  
039  
040  
041  
042  
043  
044  
045  
046  
047  
048  
049  
050

Exonic Part Number

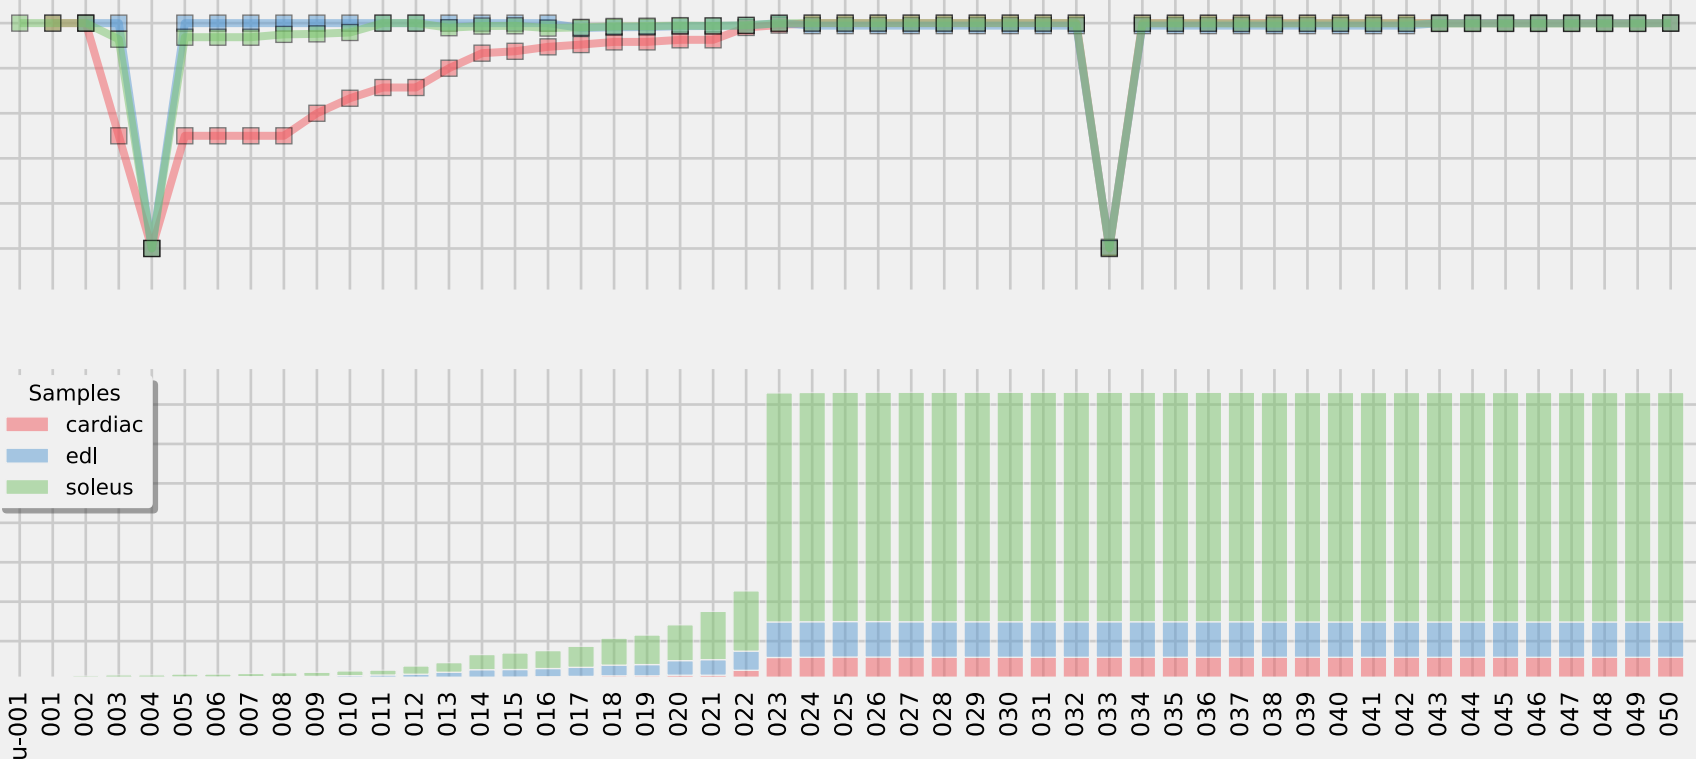

# Flt1

FL Match / Total

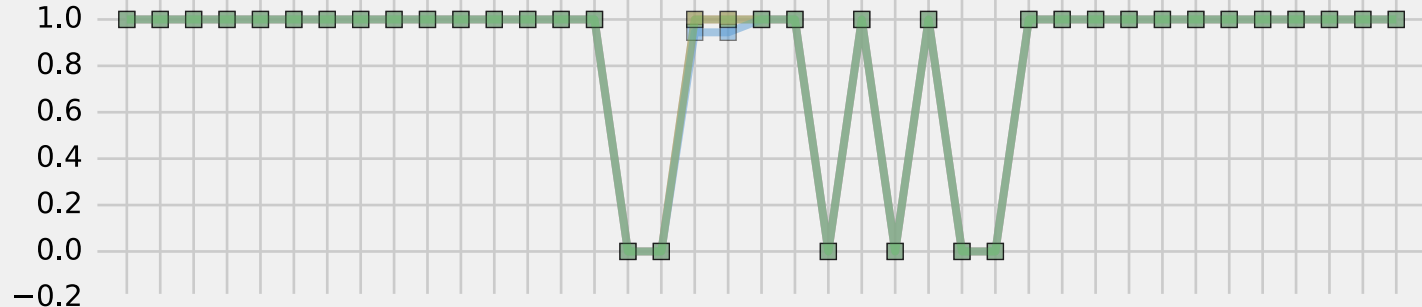

Total FL Reads

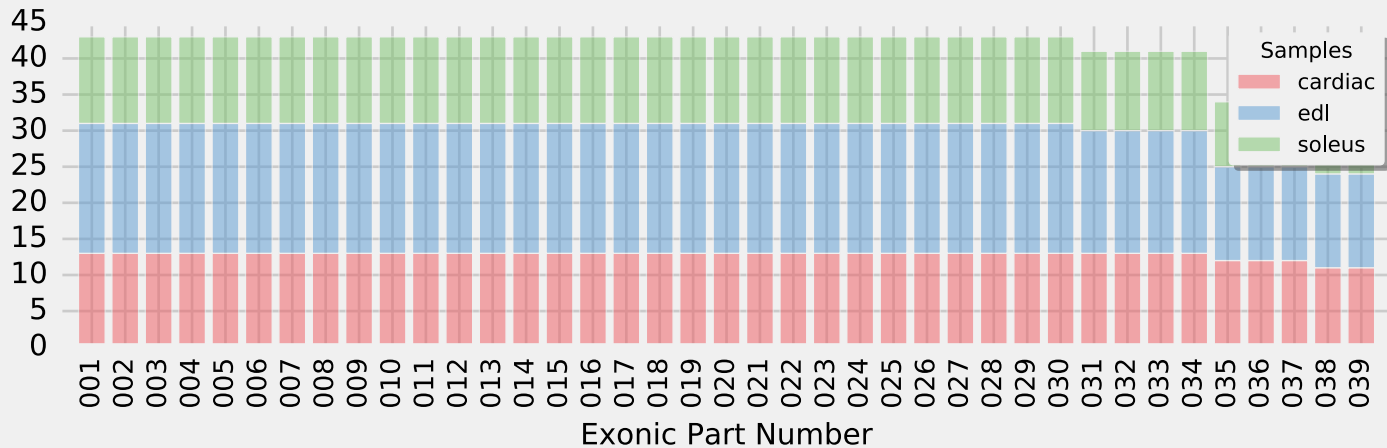

# Fn1

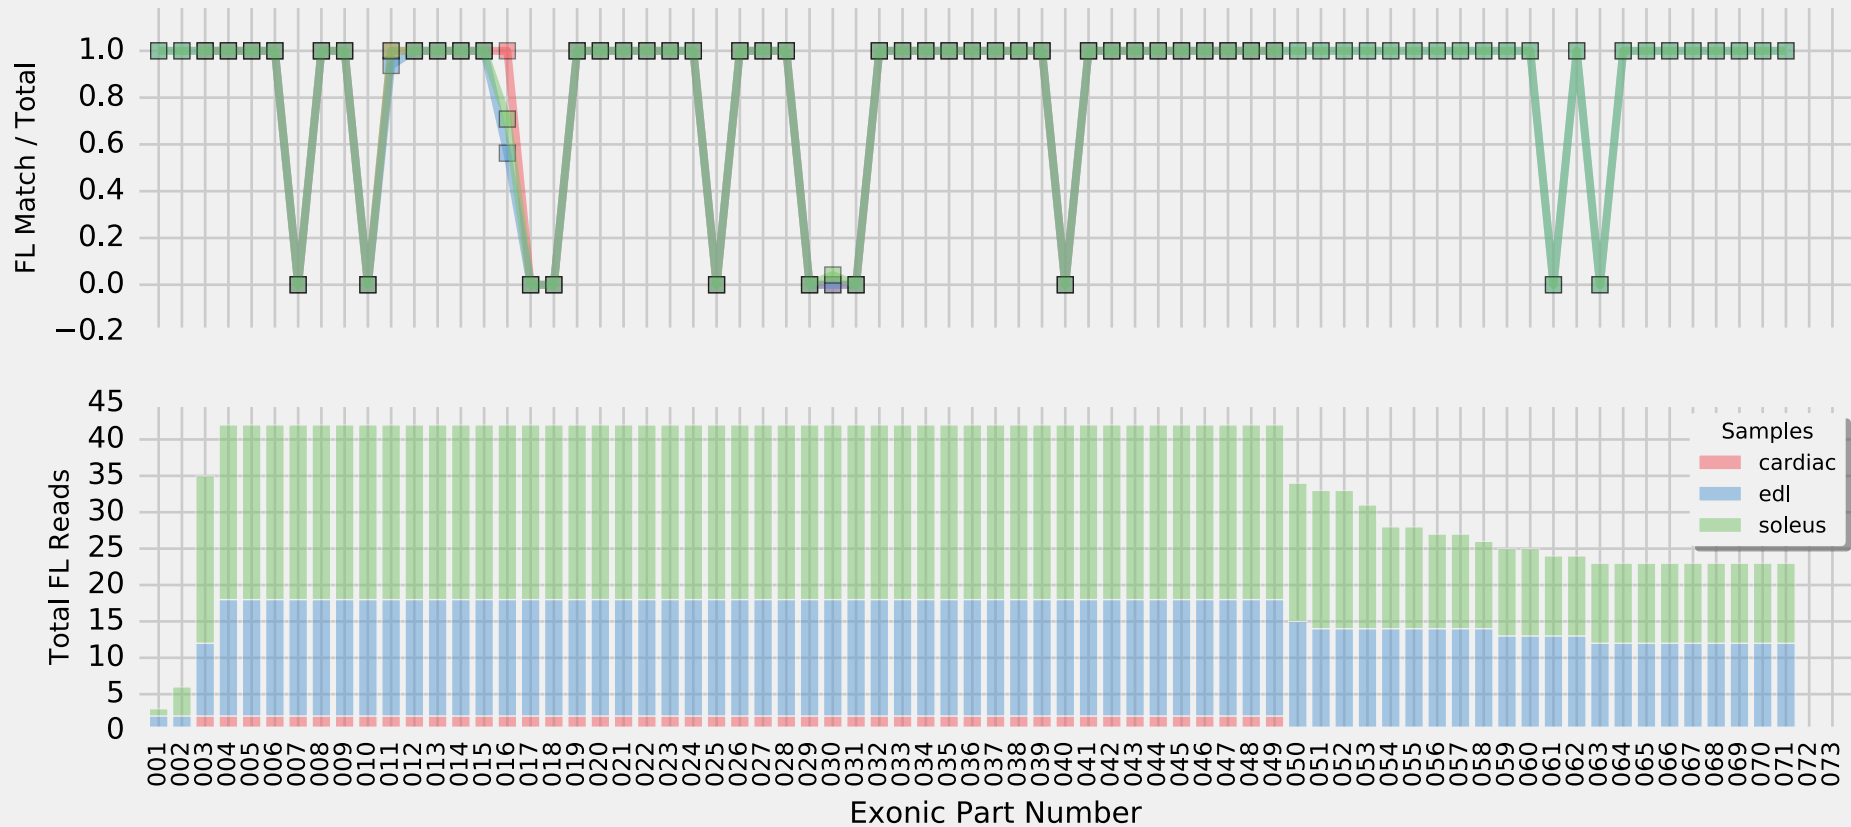

# Fndc3a

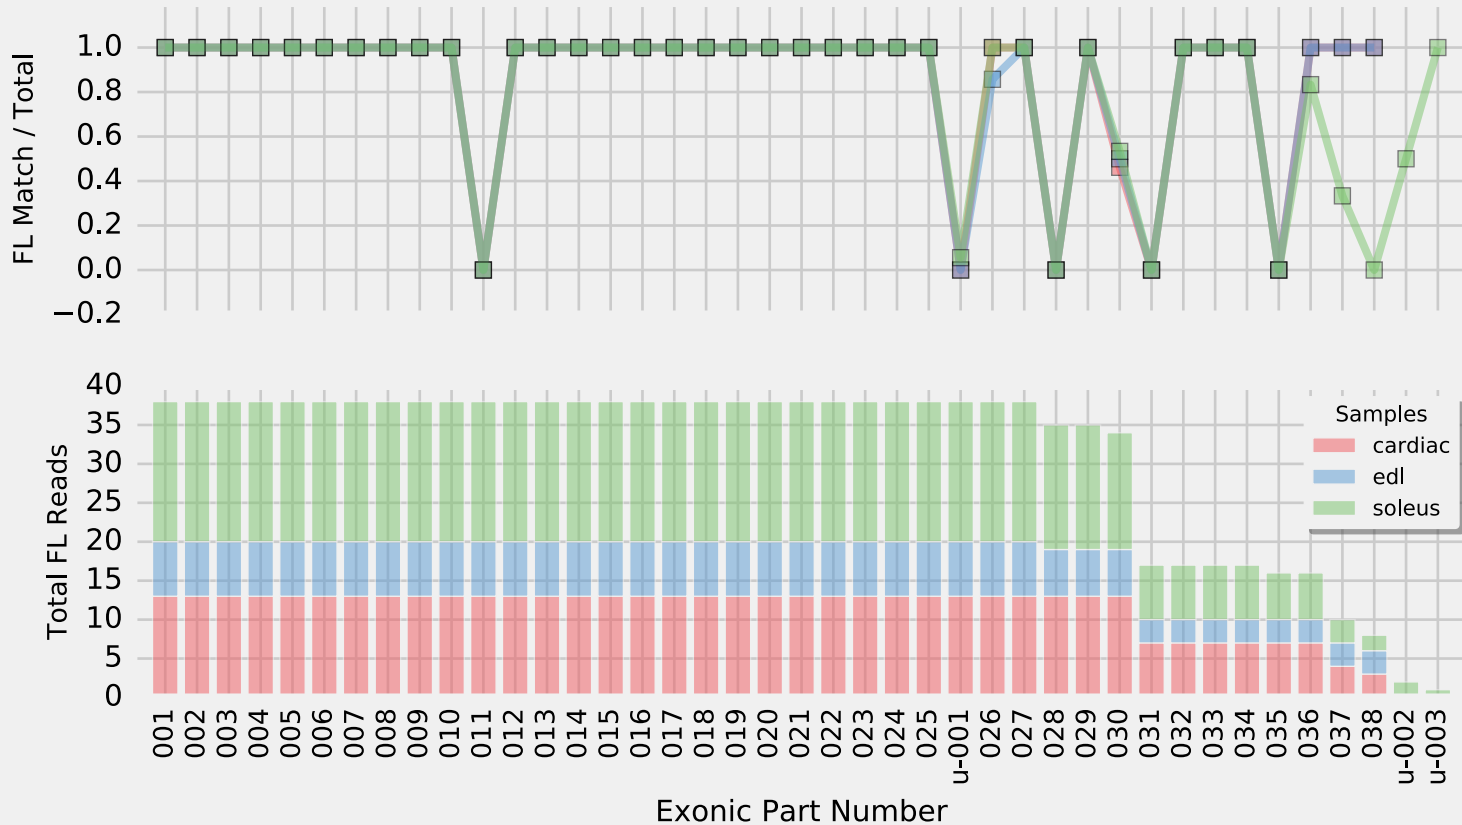



# Fndc3b

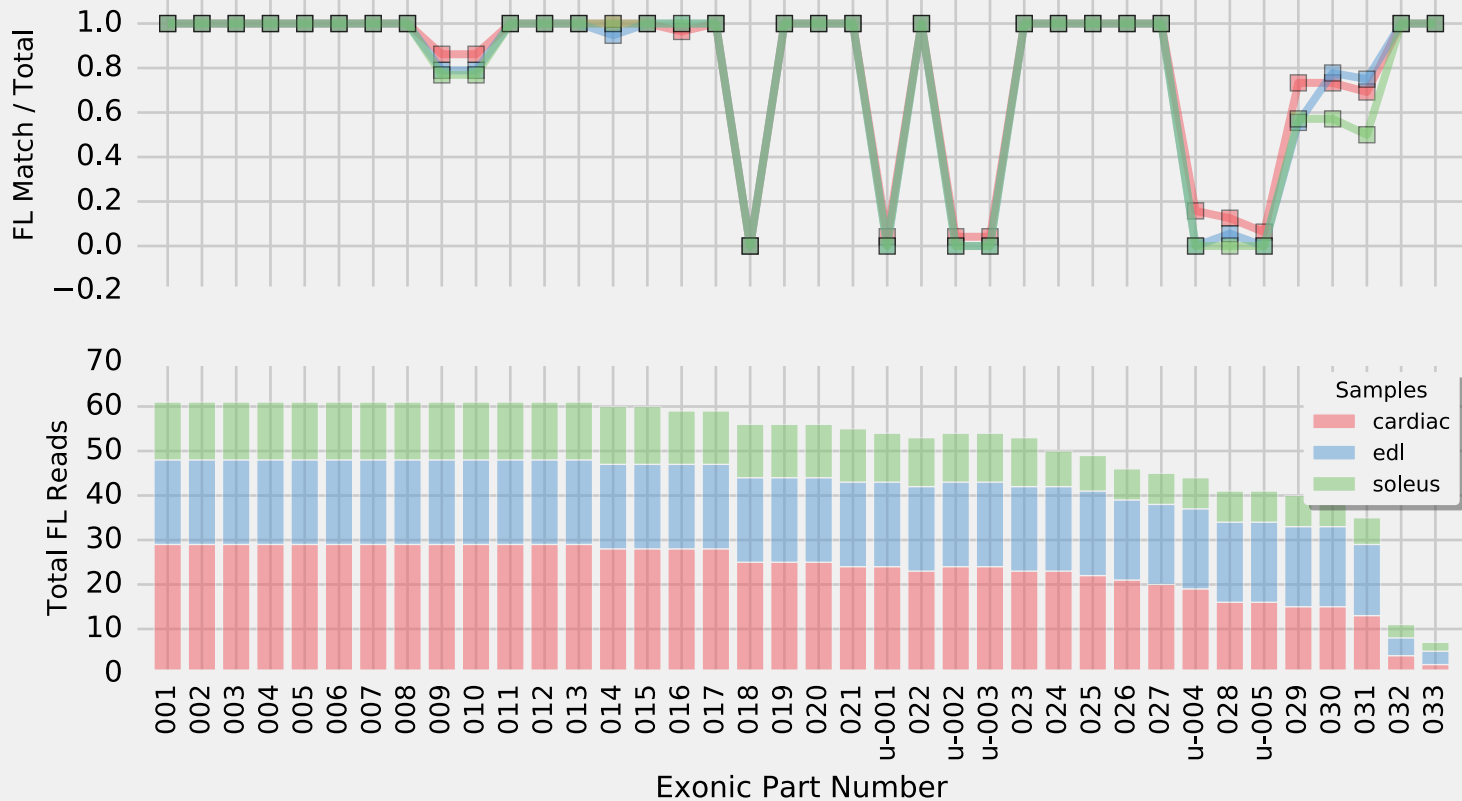

# Fnip1

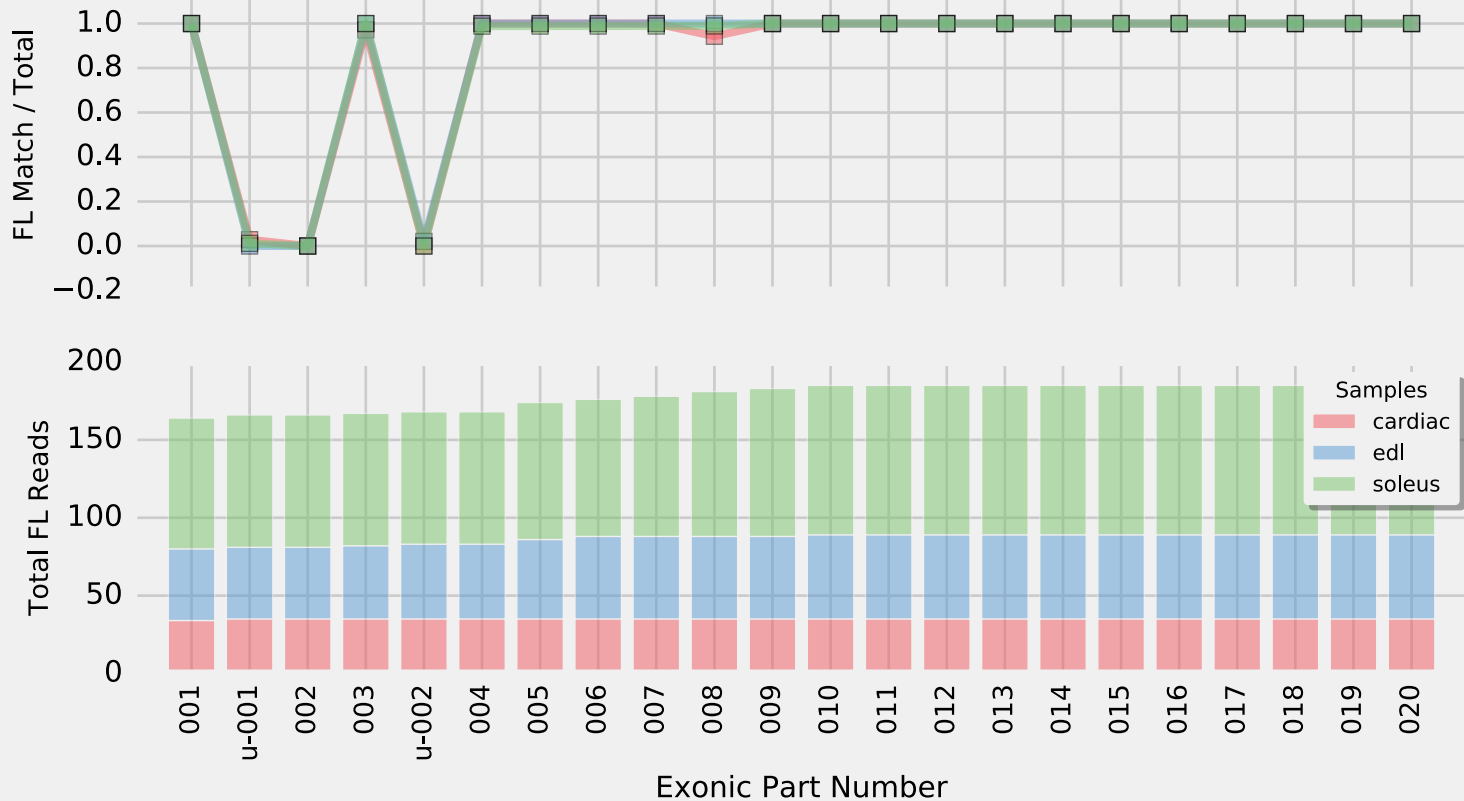

# Focad

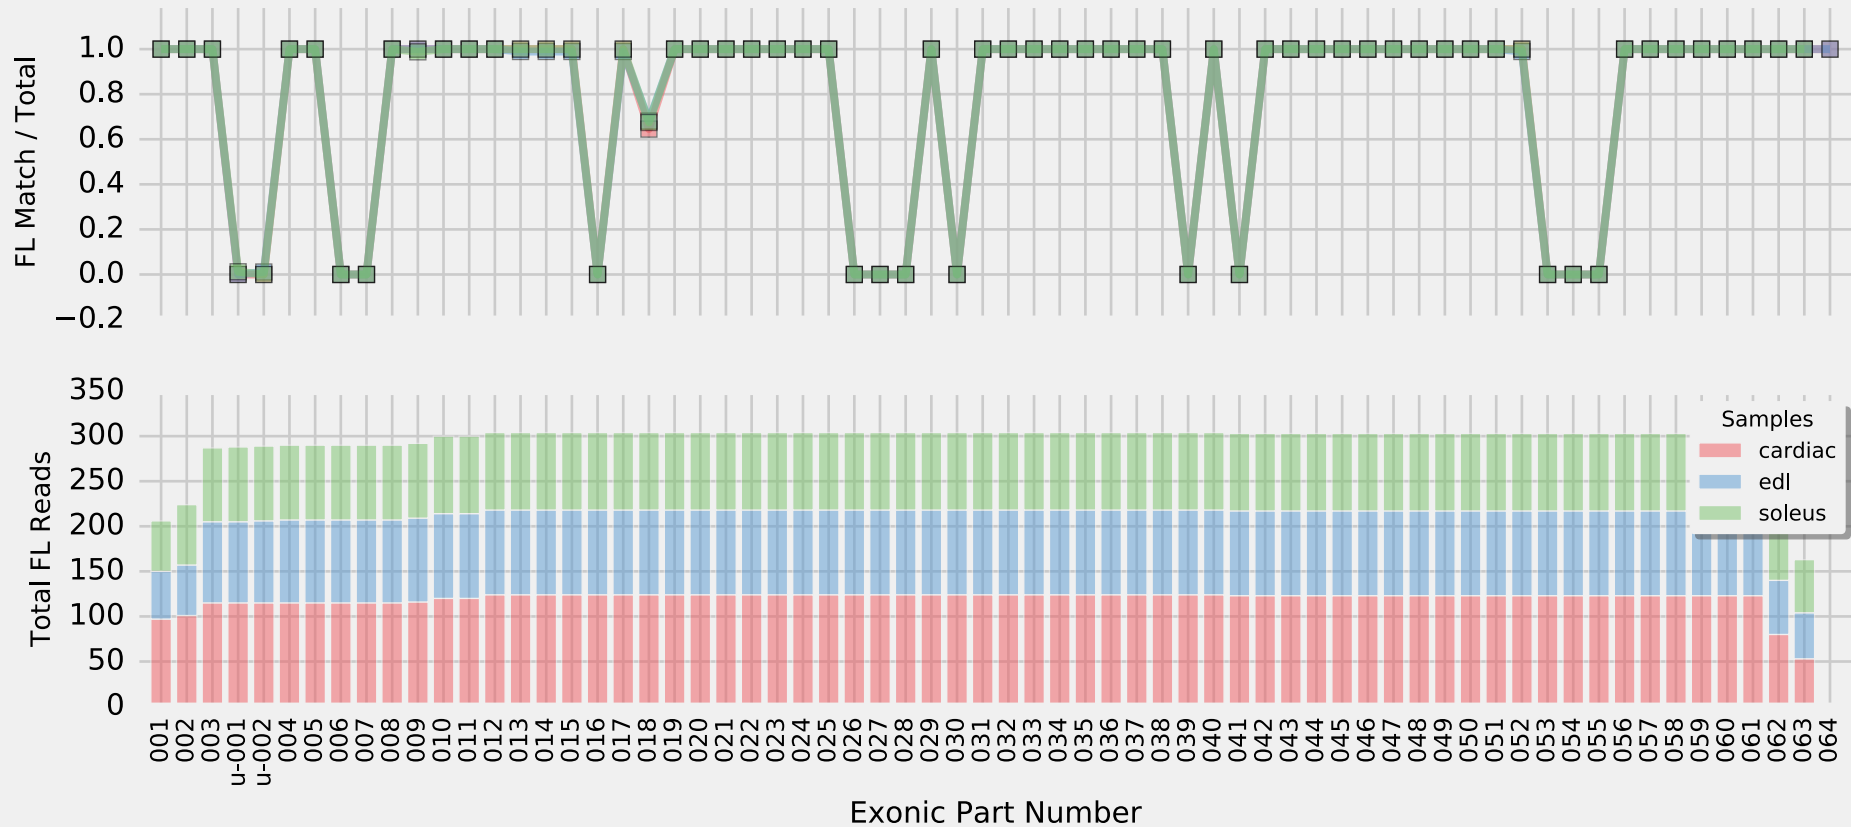

# Foxn3

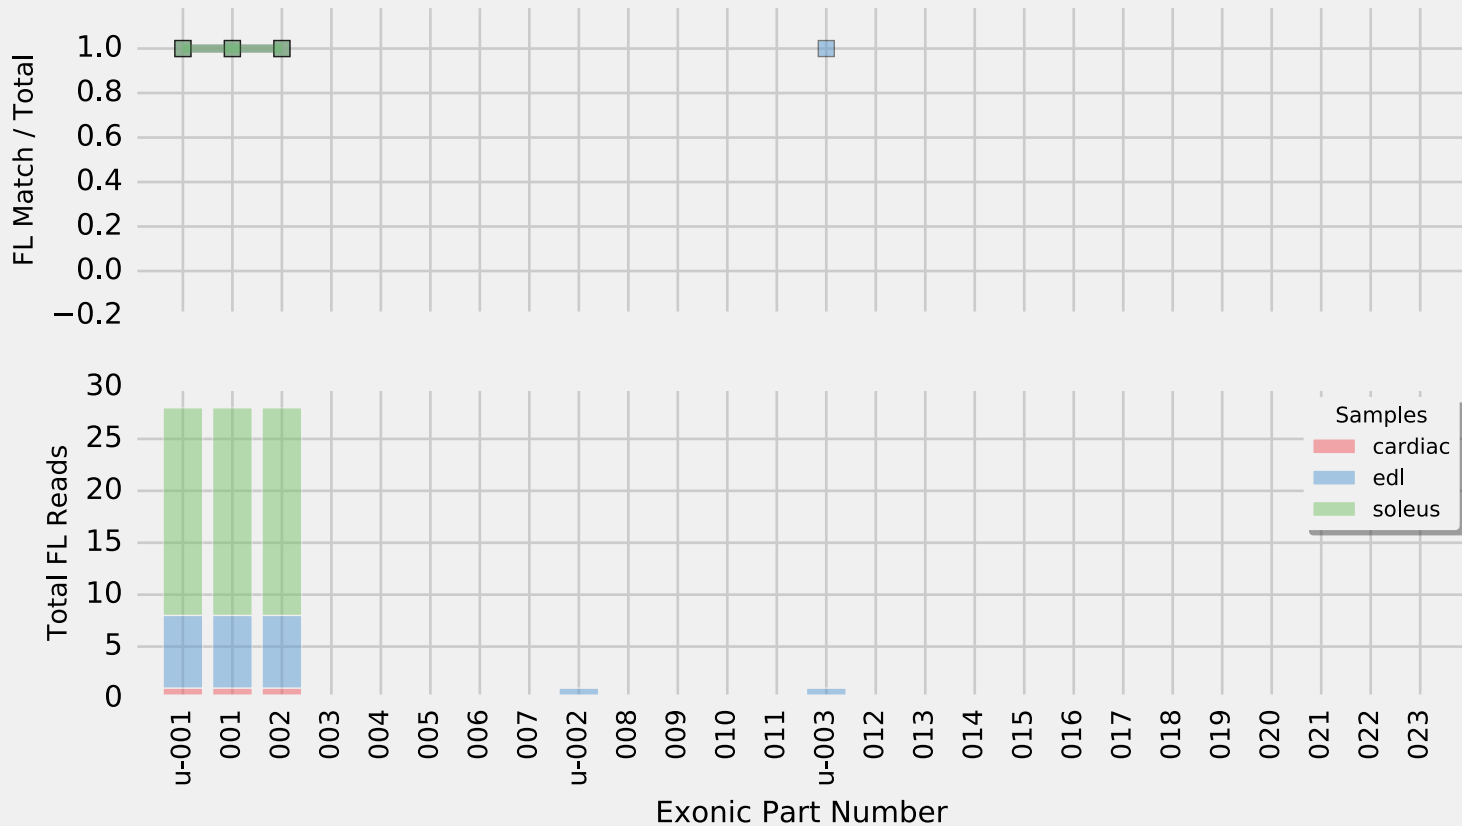

# Foxo3

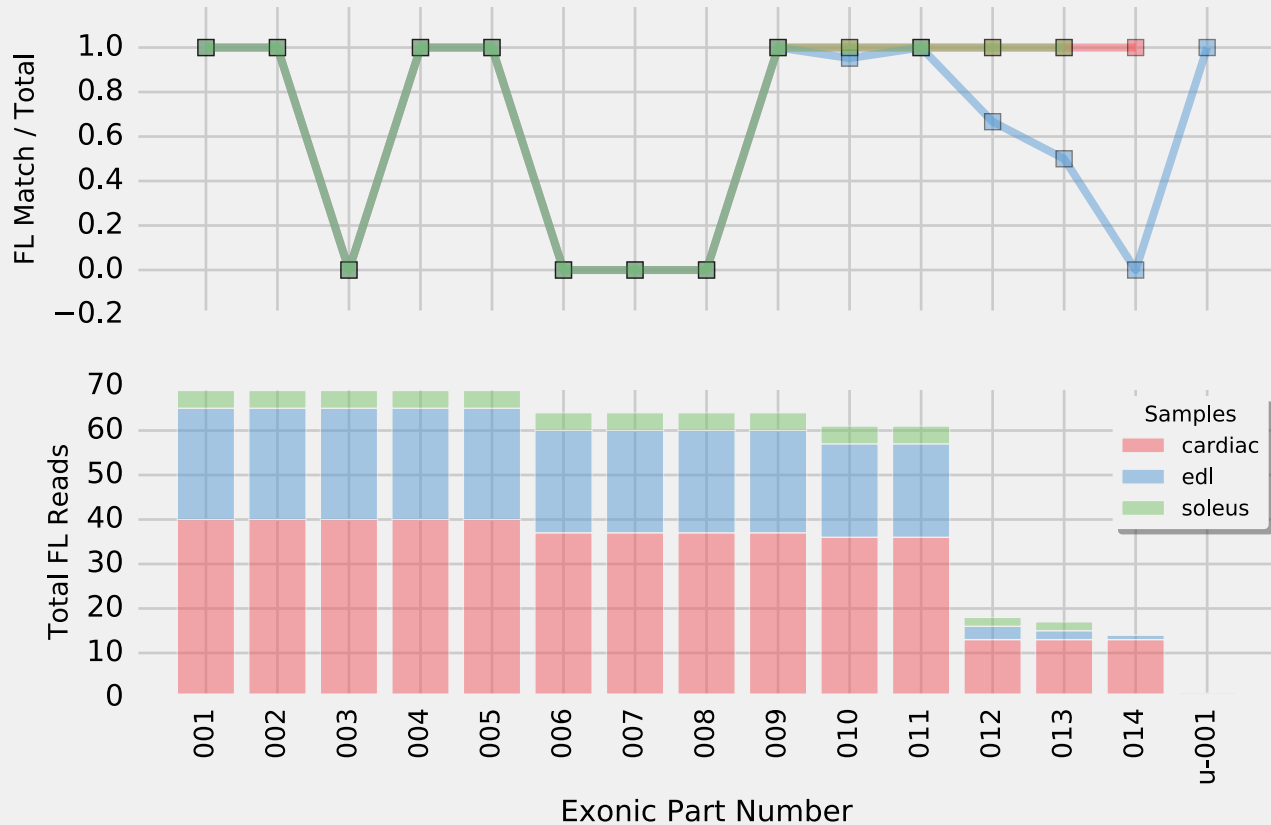

# Fryl

FL Match / Total

1.0  
0.8  
0.6  
0.4  
0.2  
0.0  
-0.2

Total FL Reads

20  
15  
10  
5  
0

Samples

cardiac  
edl  
soleus

Exonic Part Number

001 002 003 004 005 006 007 008 009 010 011 012 013 014 015 016 017 018 019 020 021 022 023 024 025 026 027 028 029 030 031 032 033 034 035 036 037 038 039 040 041 042 043 044 045 046 047 048 049 050 051 052 053 054 055 056 057 058 059 060 061 062 063 064 065 066 067 068 069 070 071 072 073 074 075 076 077 078 079 080 081 082 083 084 085 086 087 088 089 090 091 092 093 094 095 096 097 098 099 100 101 102 103 104 105 106

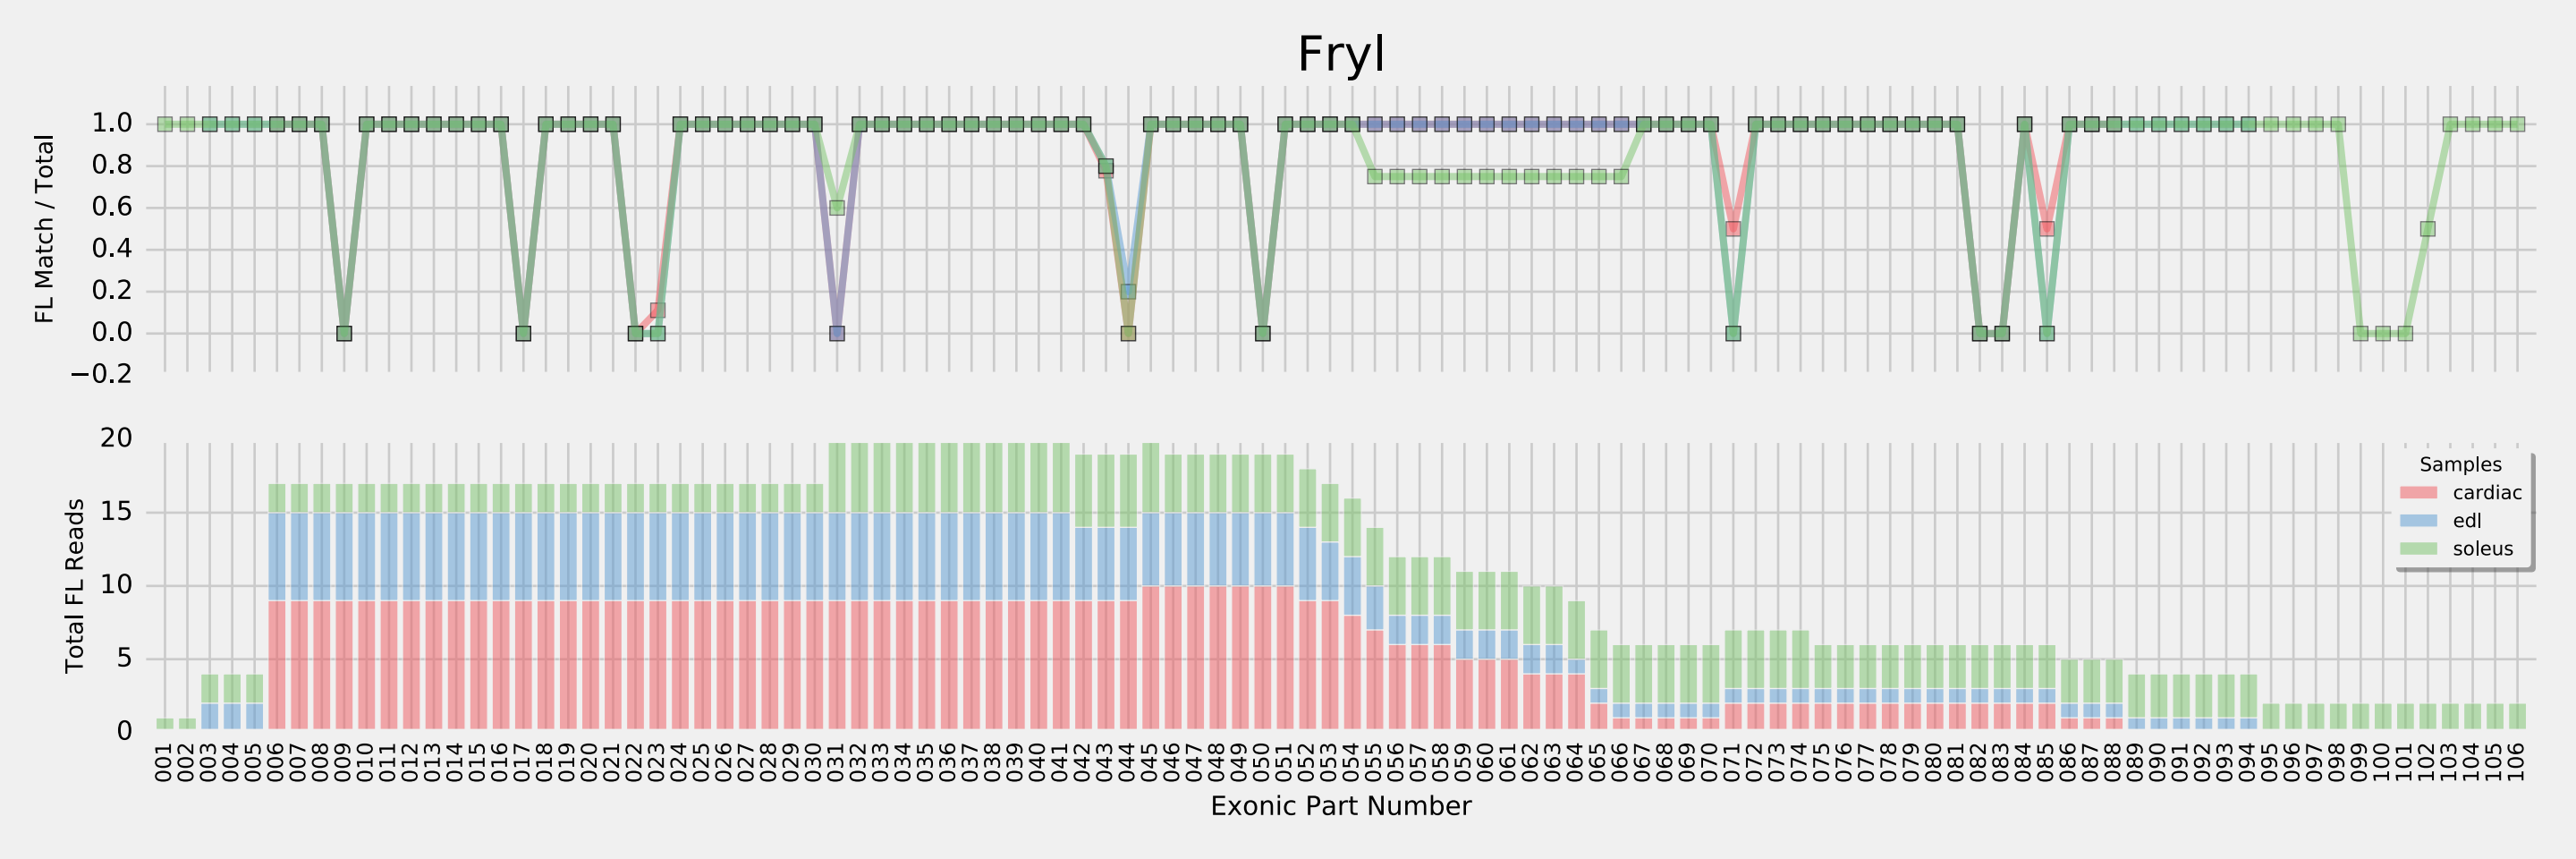

# Fsd1l

FL Match / Total

1.0  
0.8  
0.6  
0.4  
0.2  
0.0  
-0.2

Total FL Reads

40  
35  
30  
25  
20  
15  
10  
5  
0

Samples  
cardiac  
edl  
soleus

Exonic Part Number

001 002 003 004 005 006 007 008 009 010 011 012 013 014 015 016 017 018 019 020 021 022 023 024 025 026

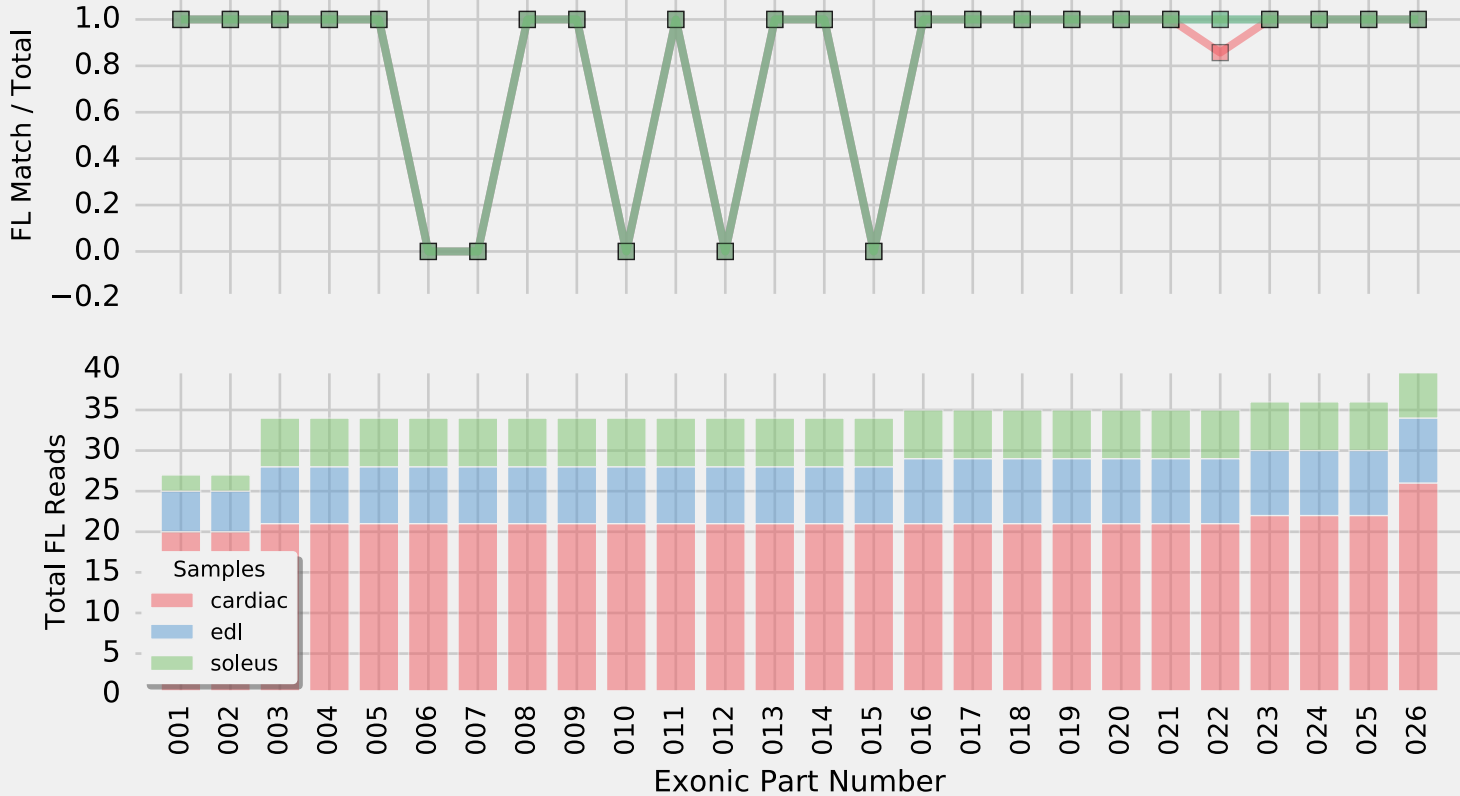

# Fzd4

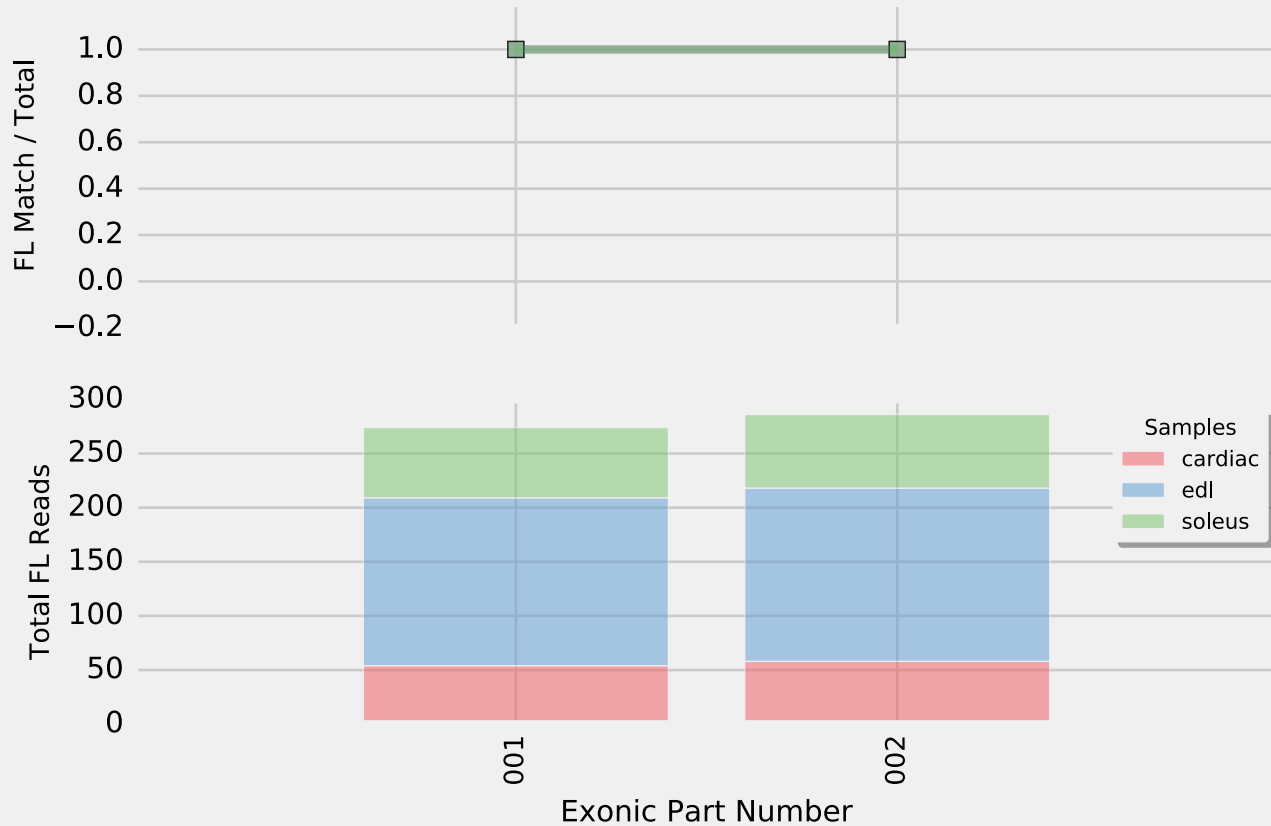



# Galnt15

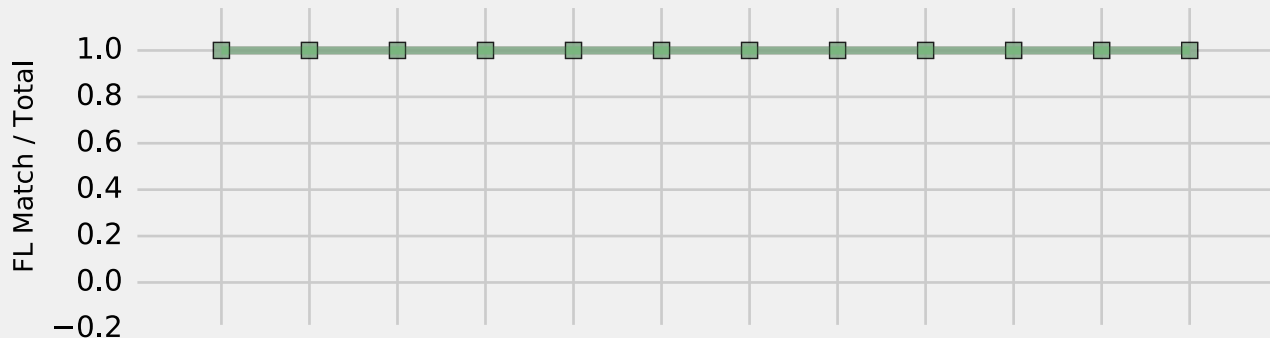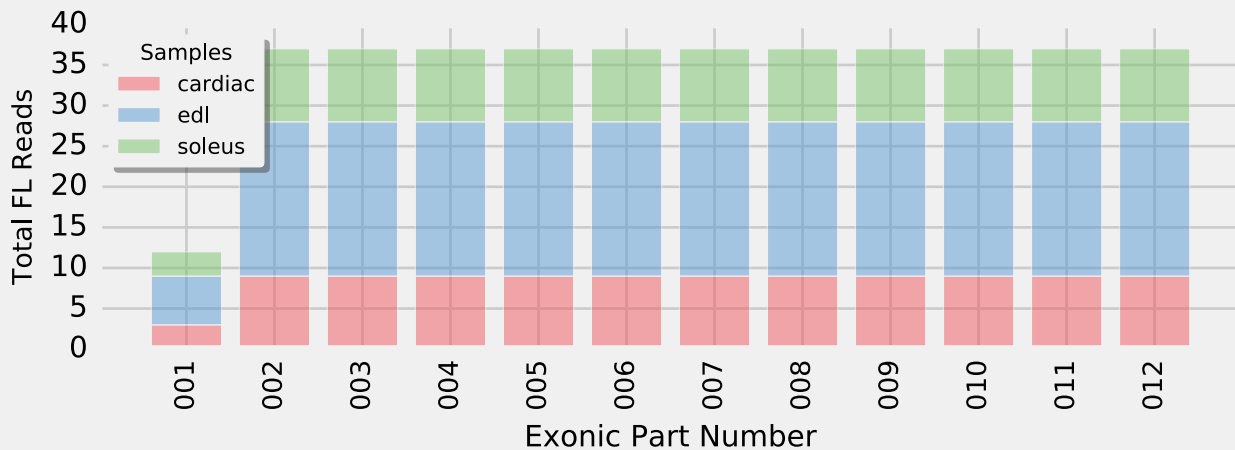

# Gapvd1

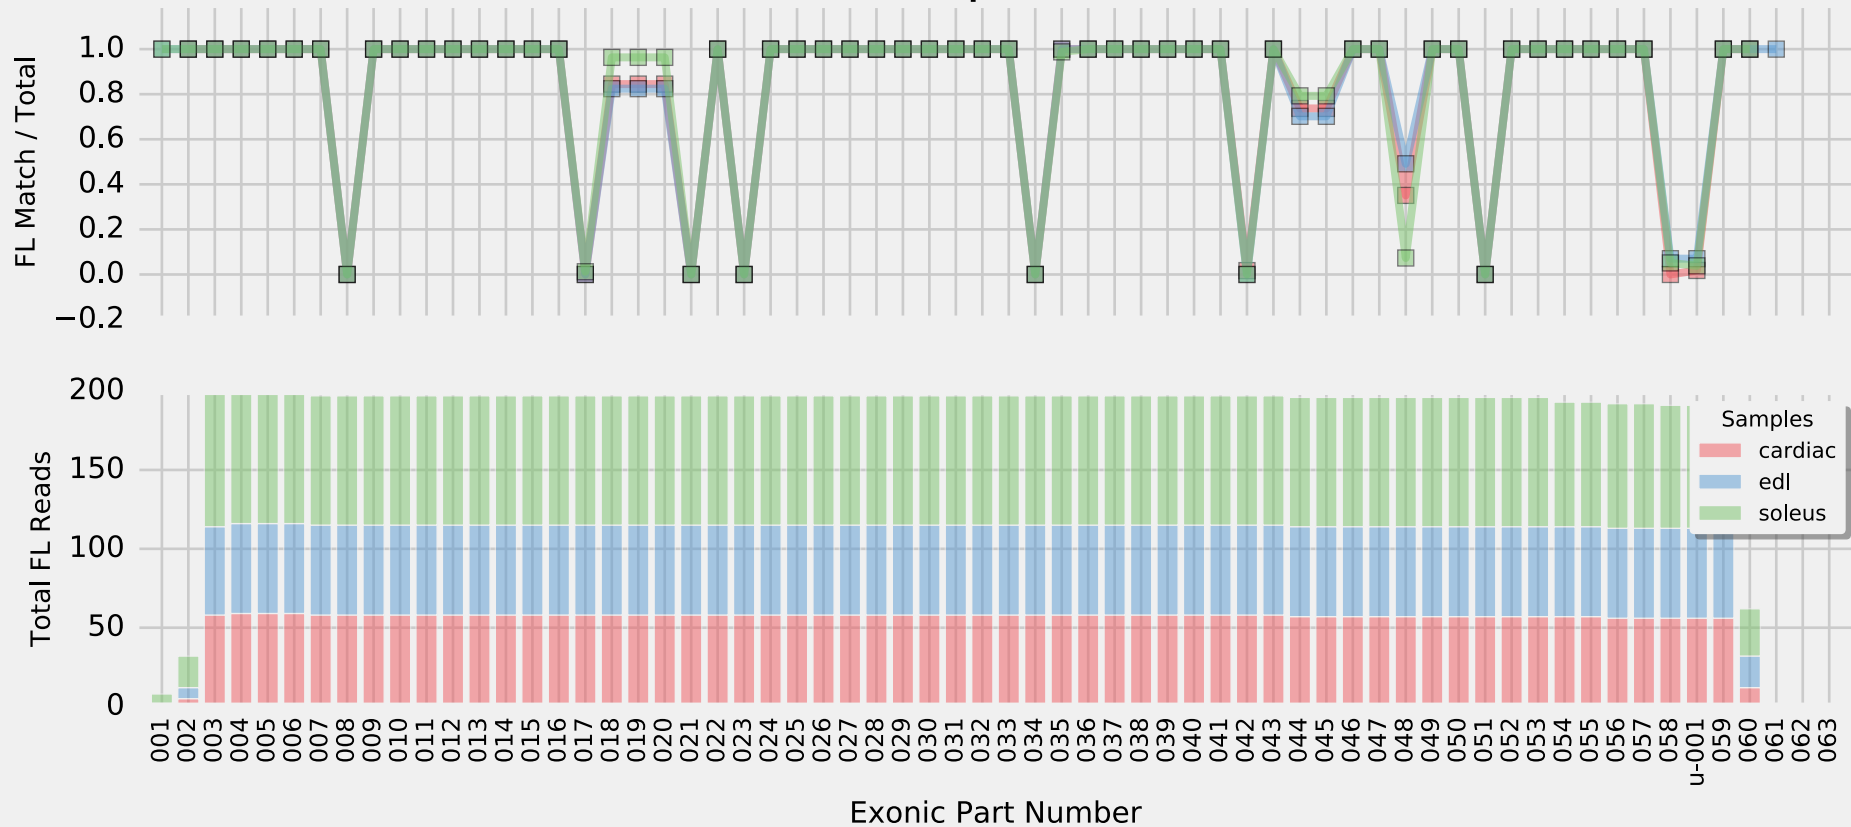

# Gbf1

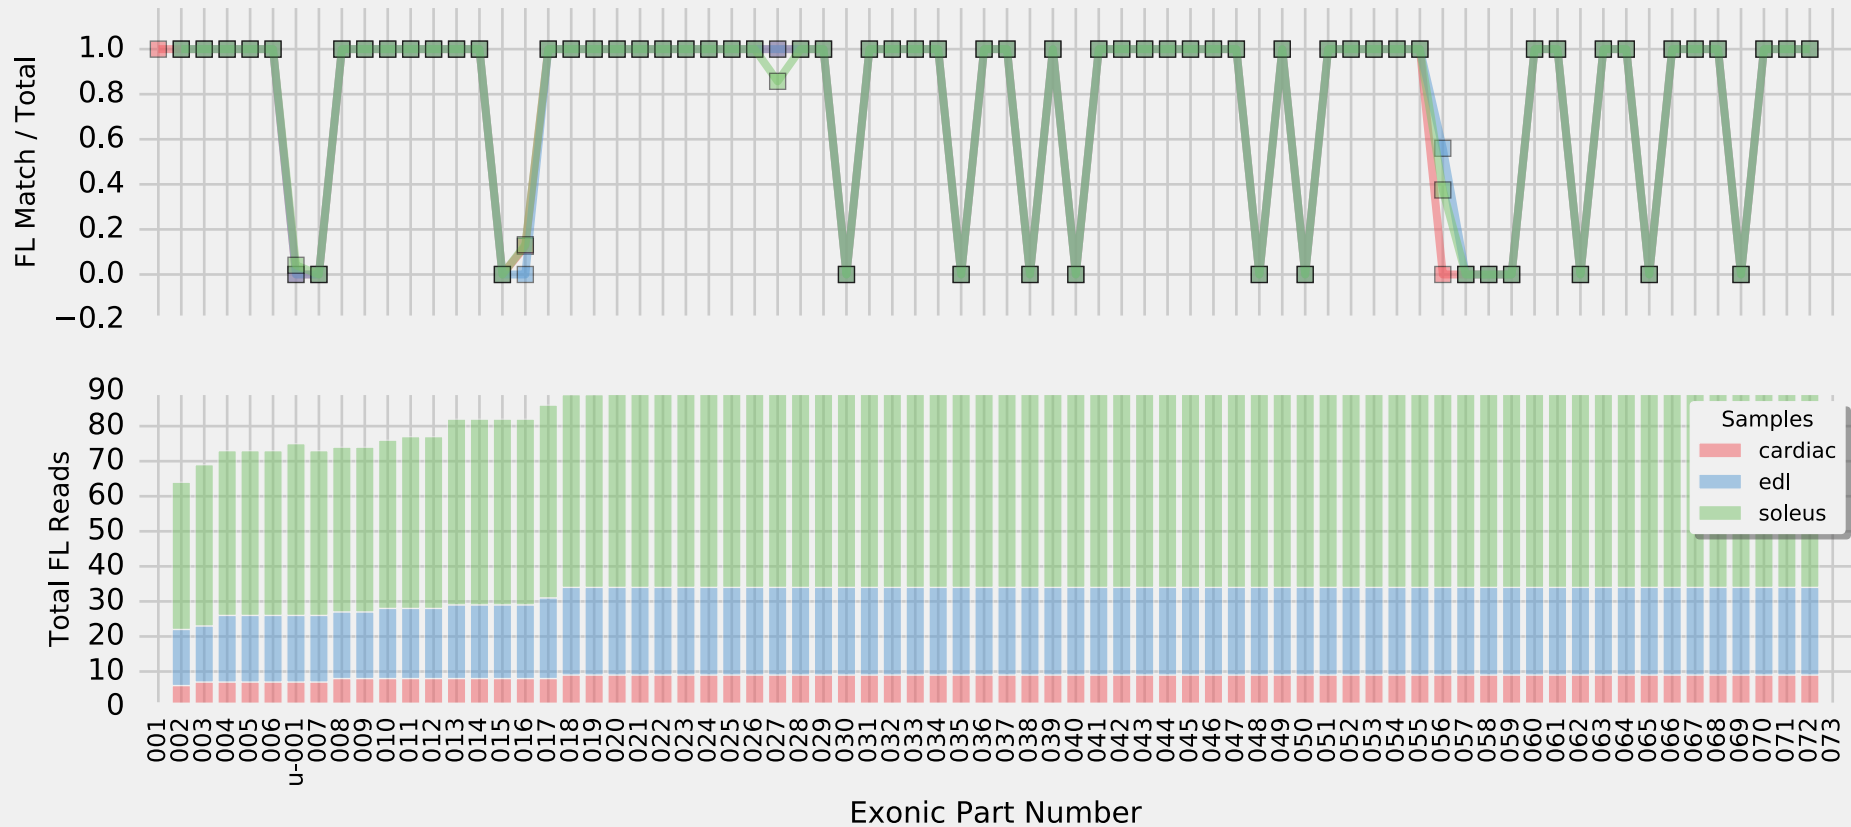

# Gcn1l1

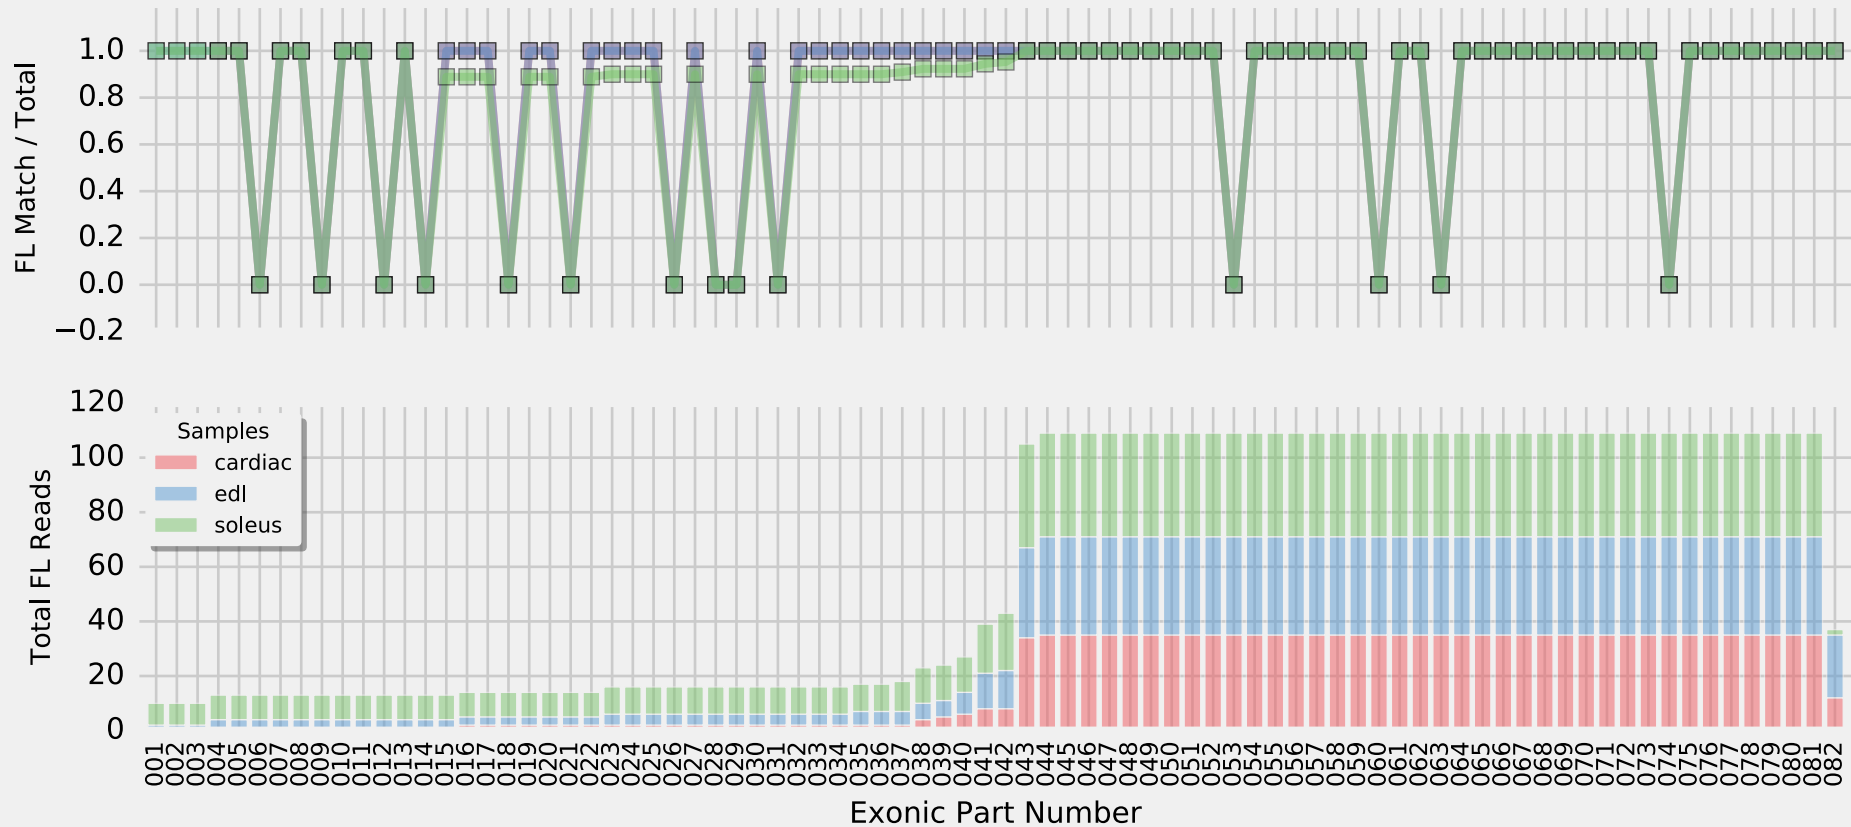

# Gdap10

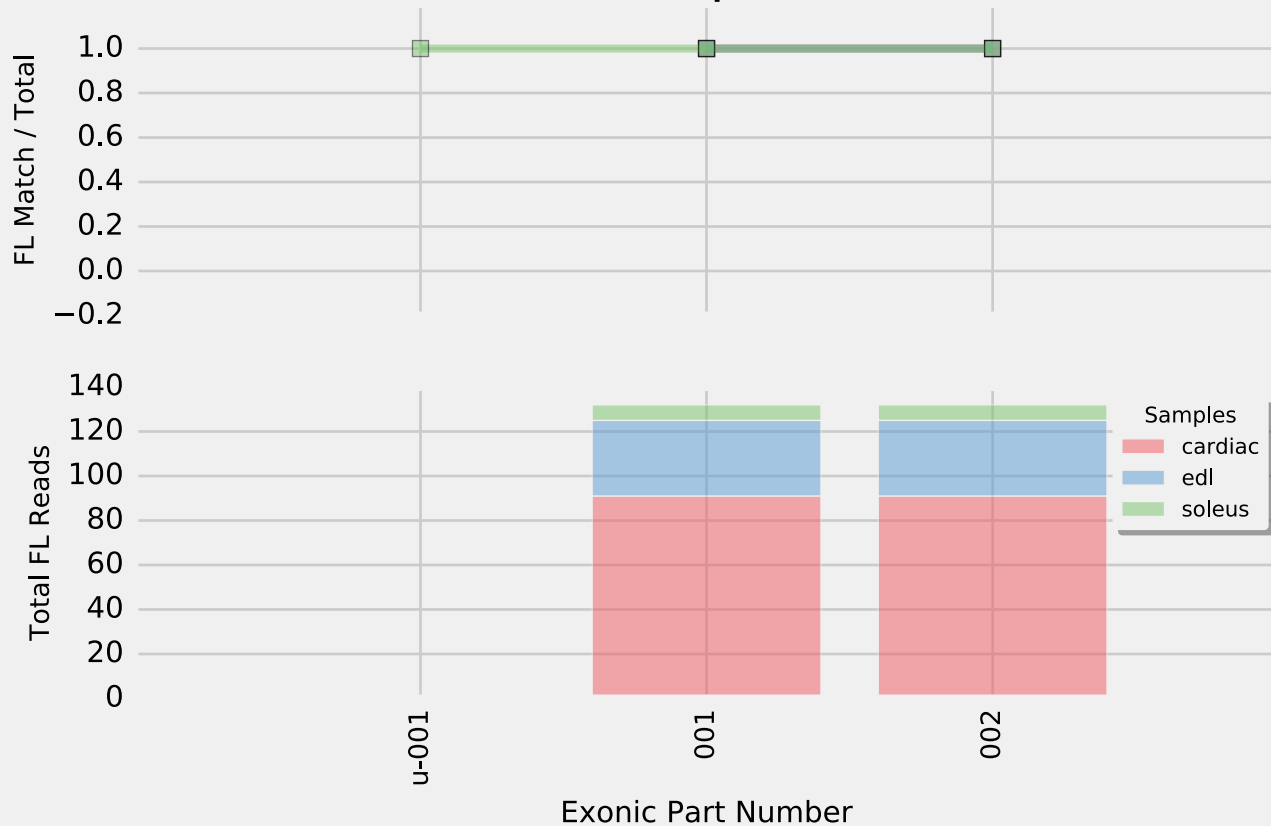

# Gemin5

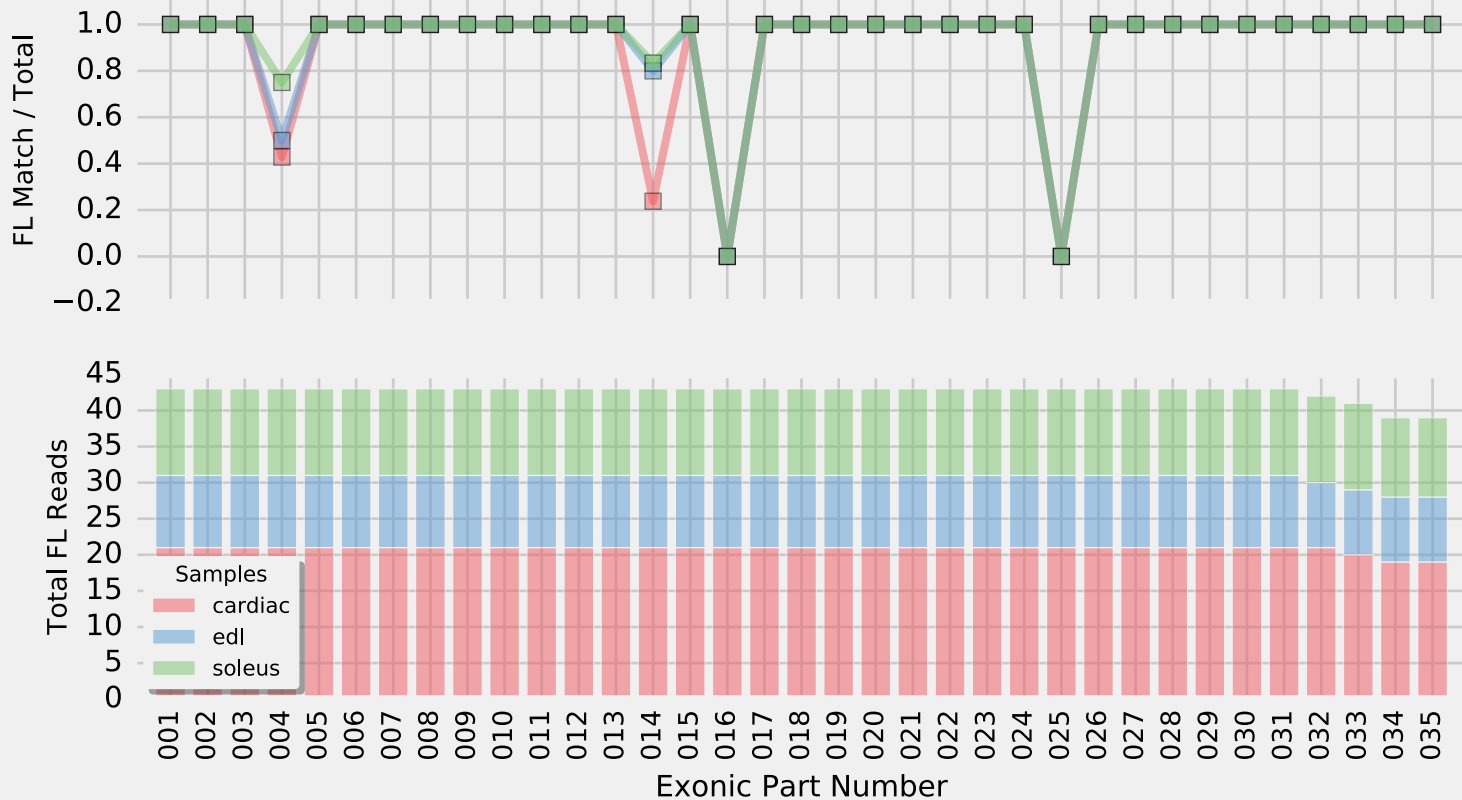

# Gfpt1

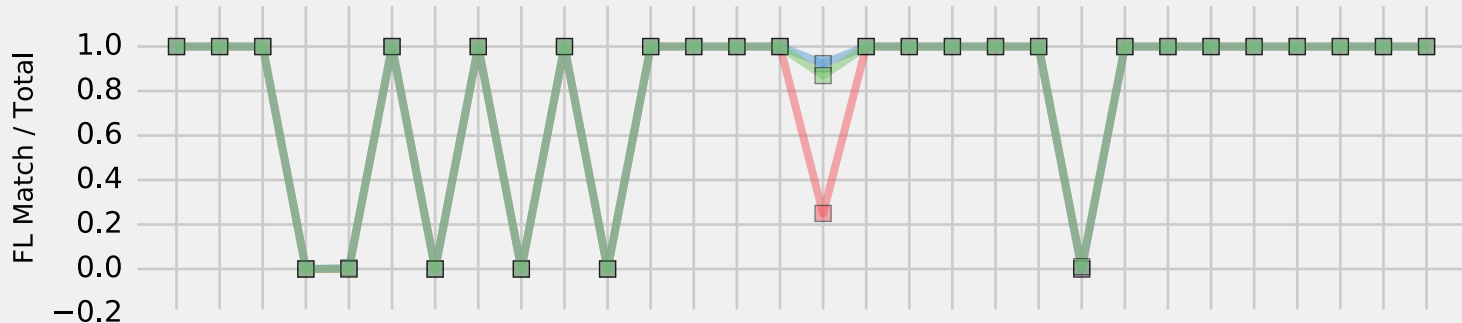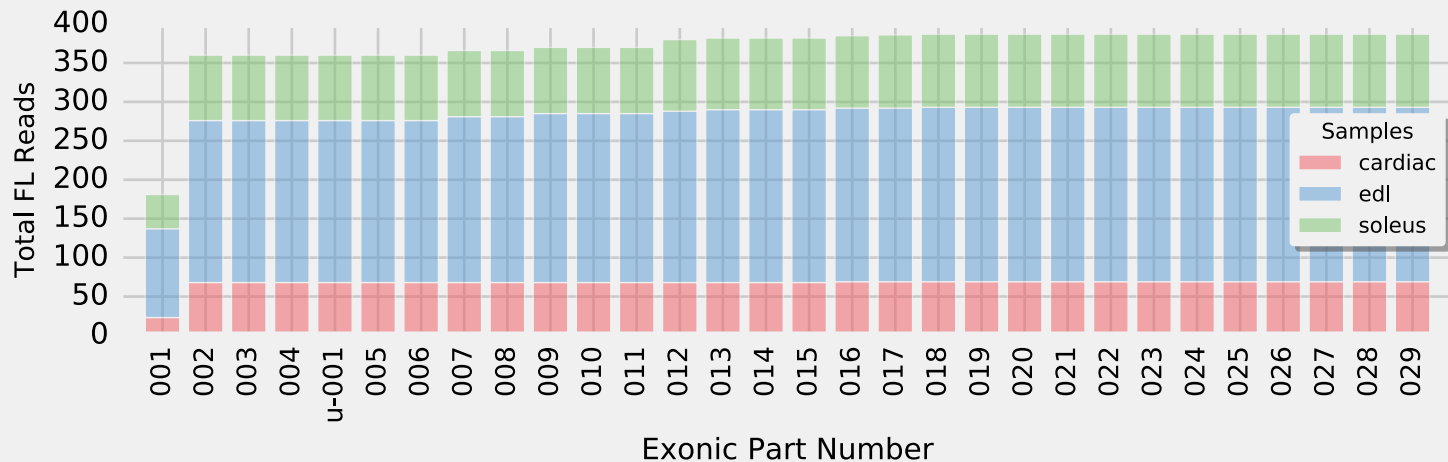

# Gigyf2

FL Match / Total

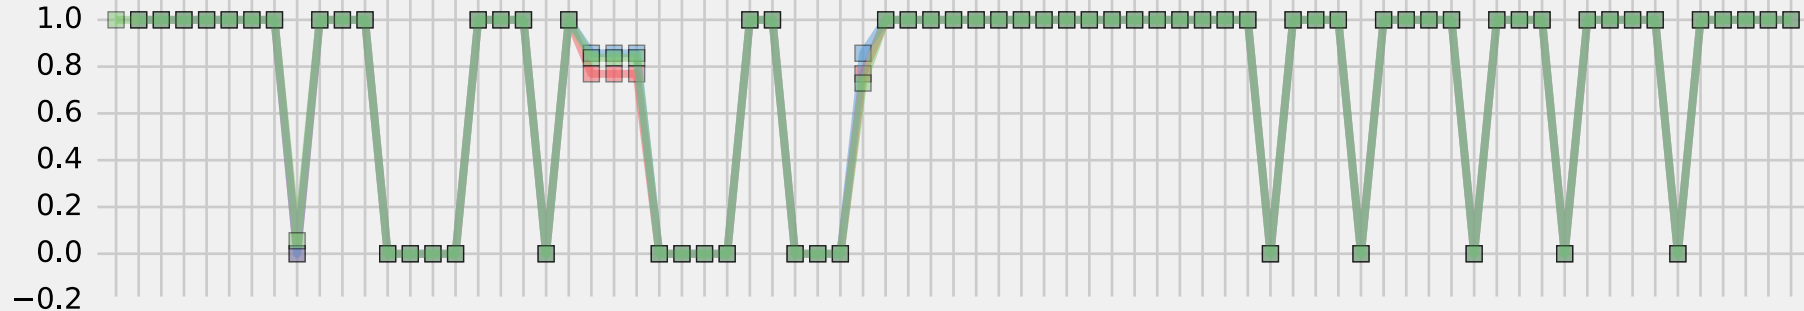

Total FL Reads

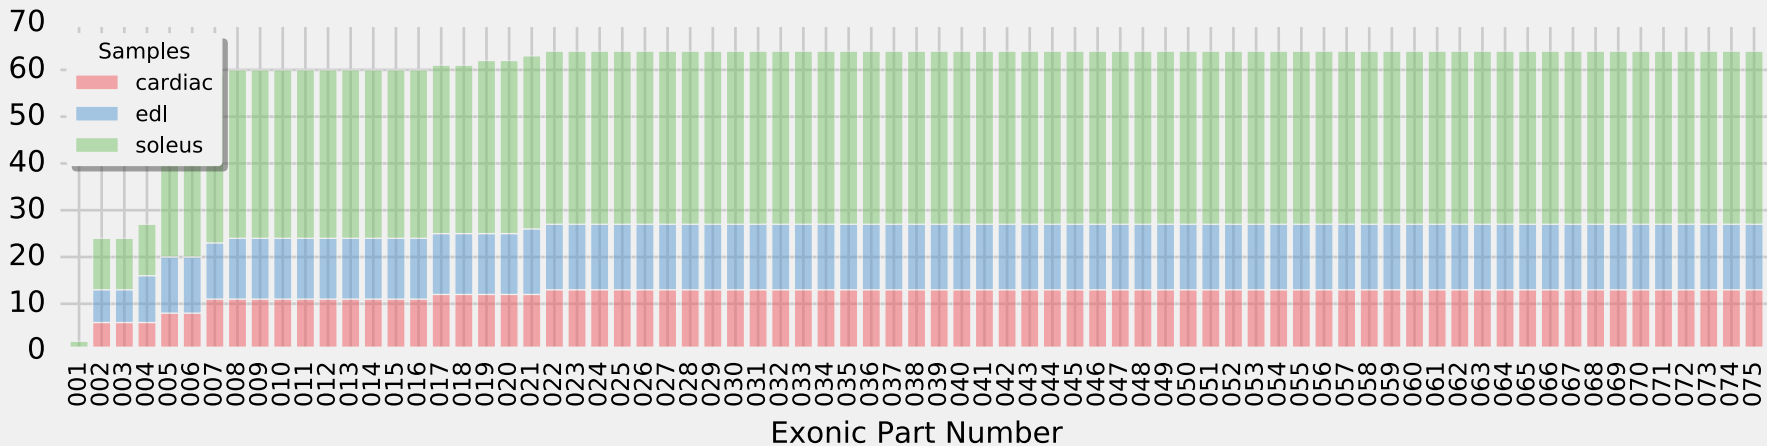



# Gm10435

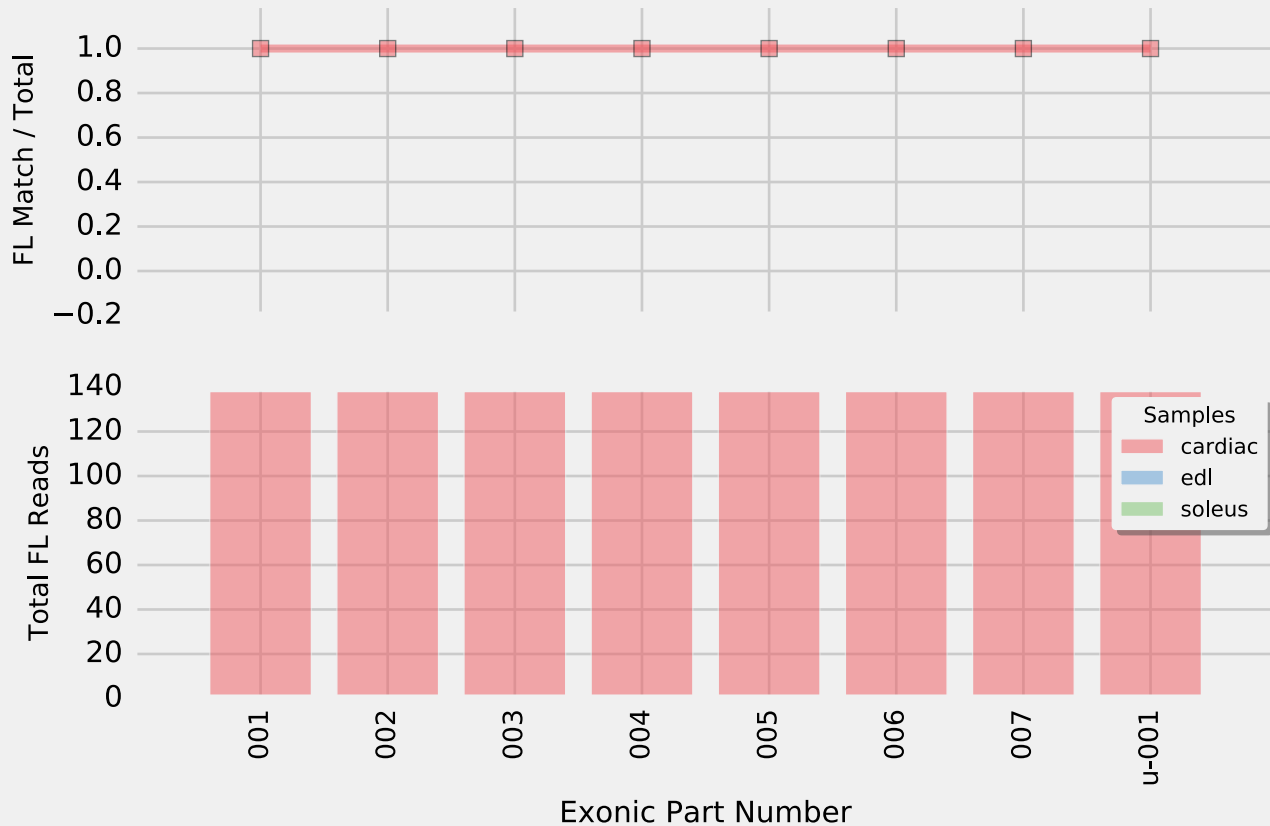

# Gm14420

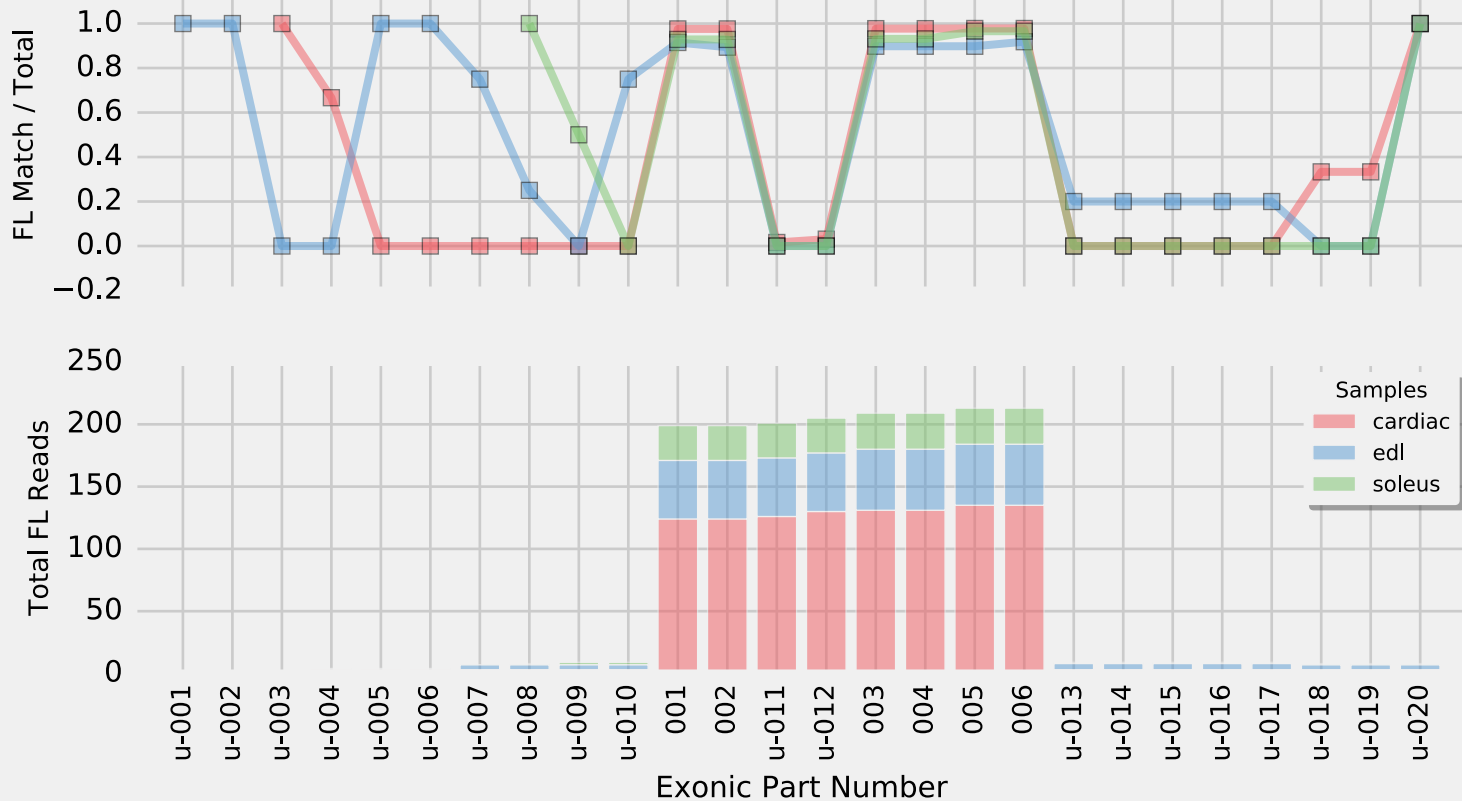

# Gm37494

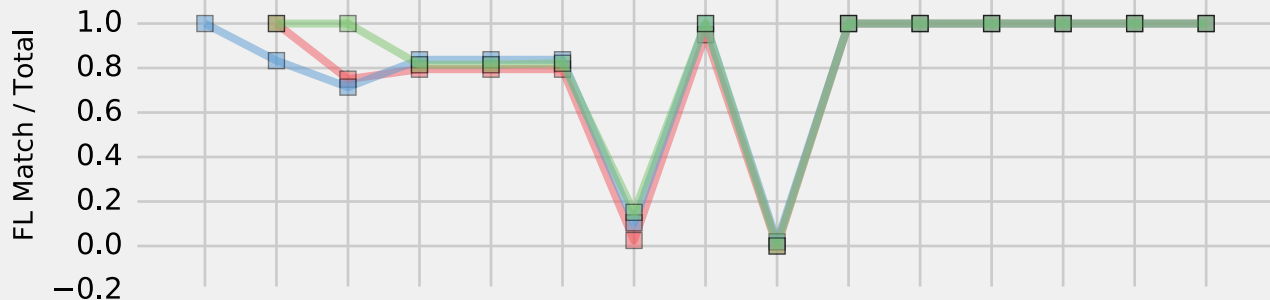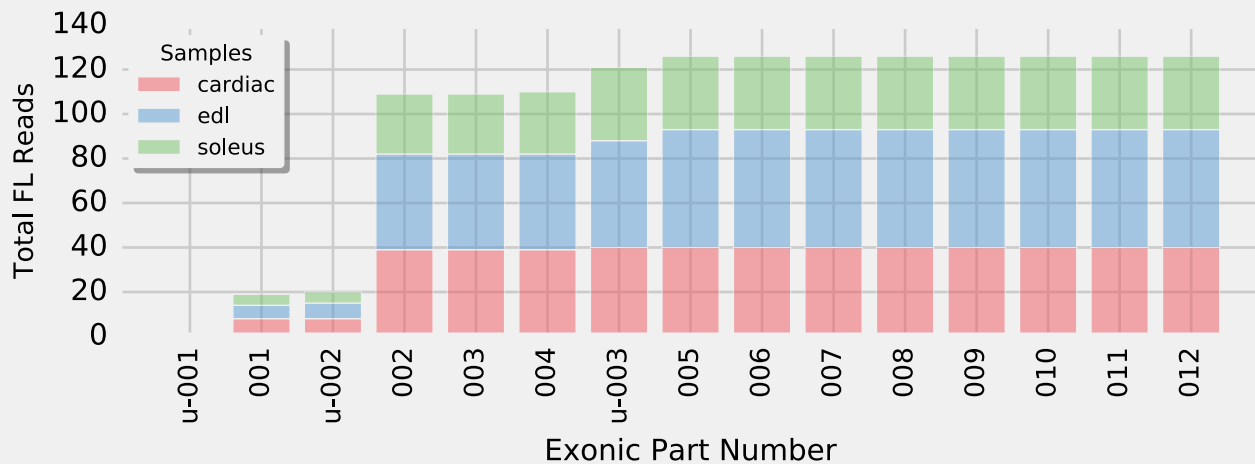

# Golga3

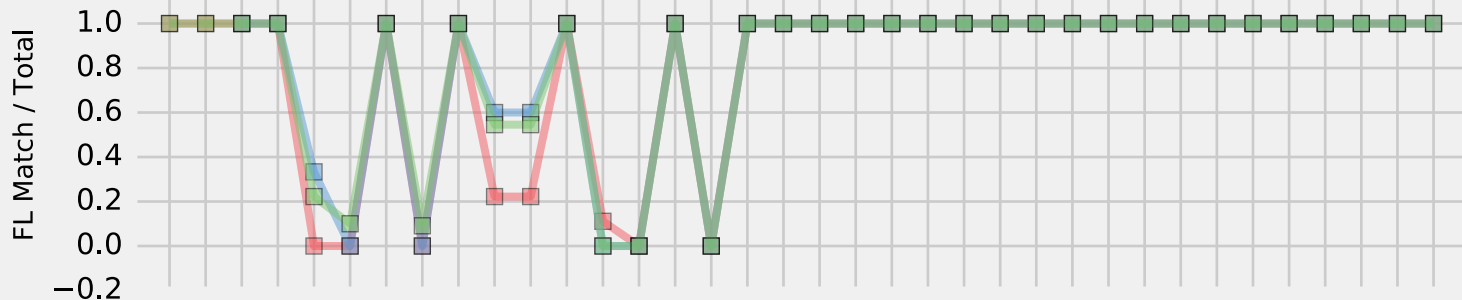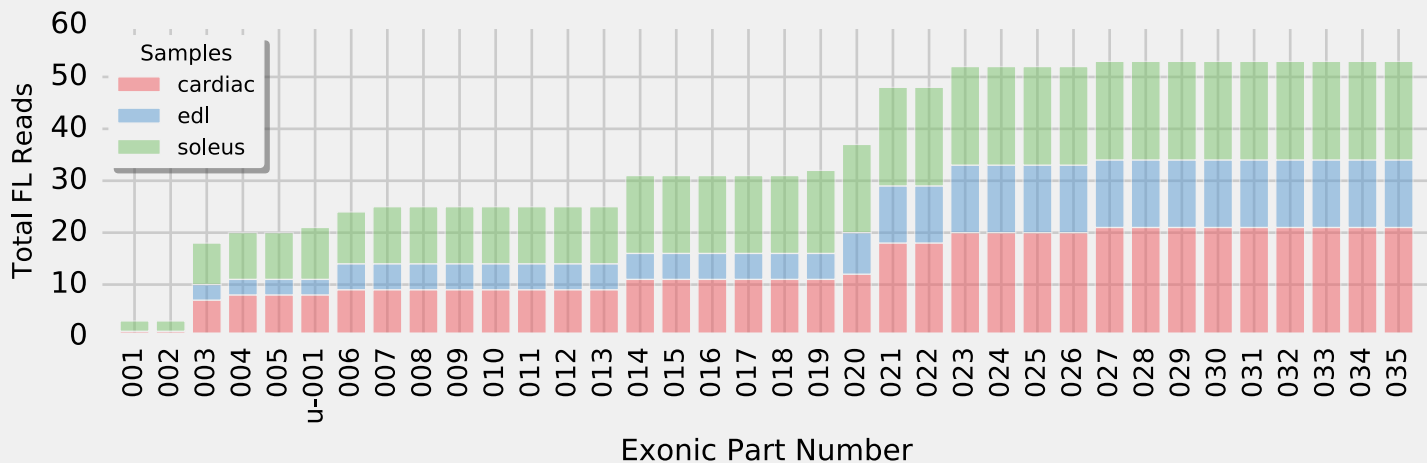

# Golga4

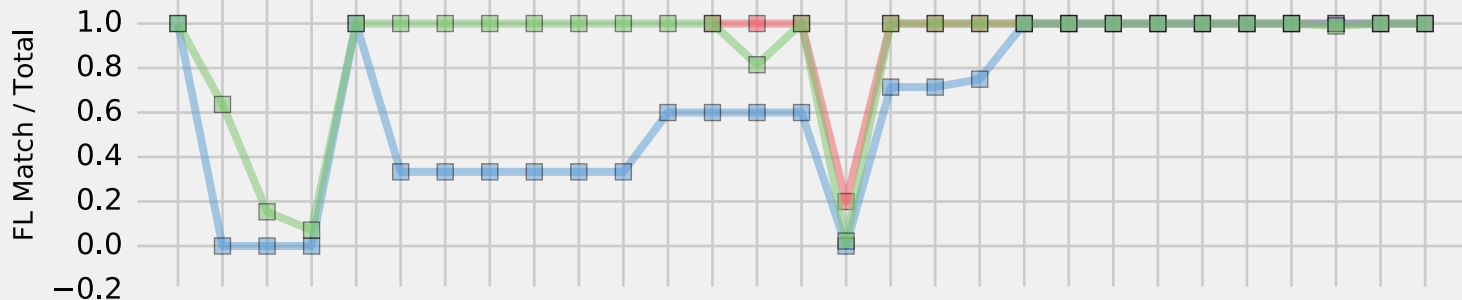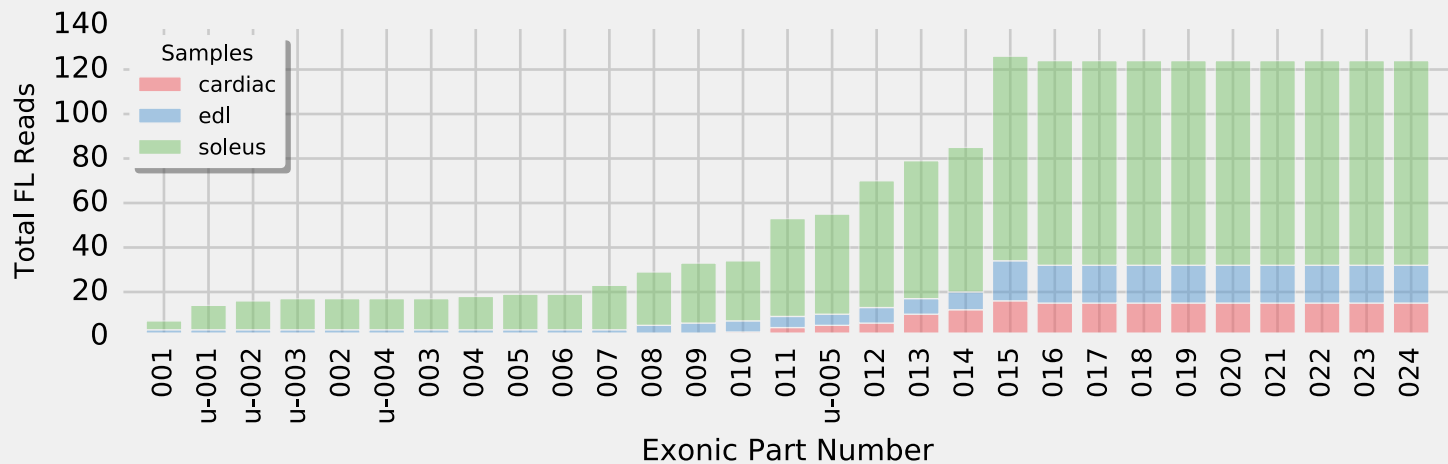

# Golgb1

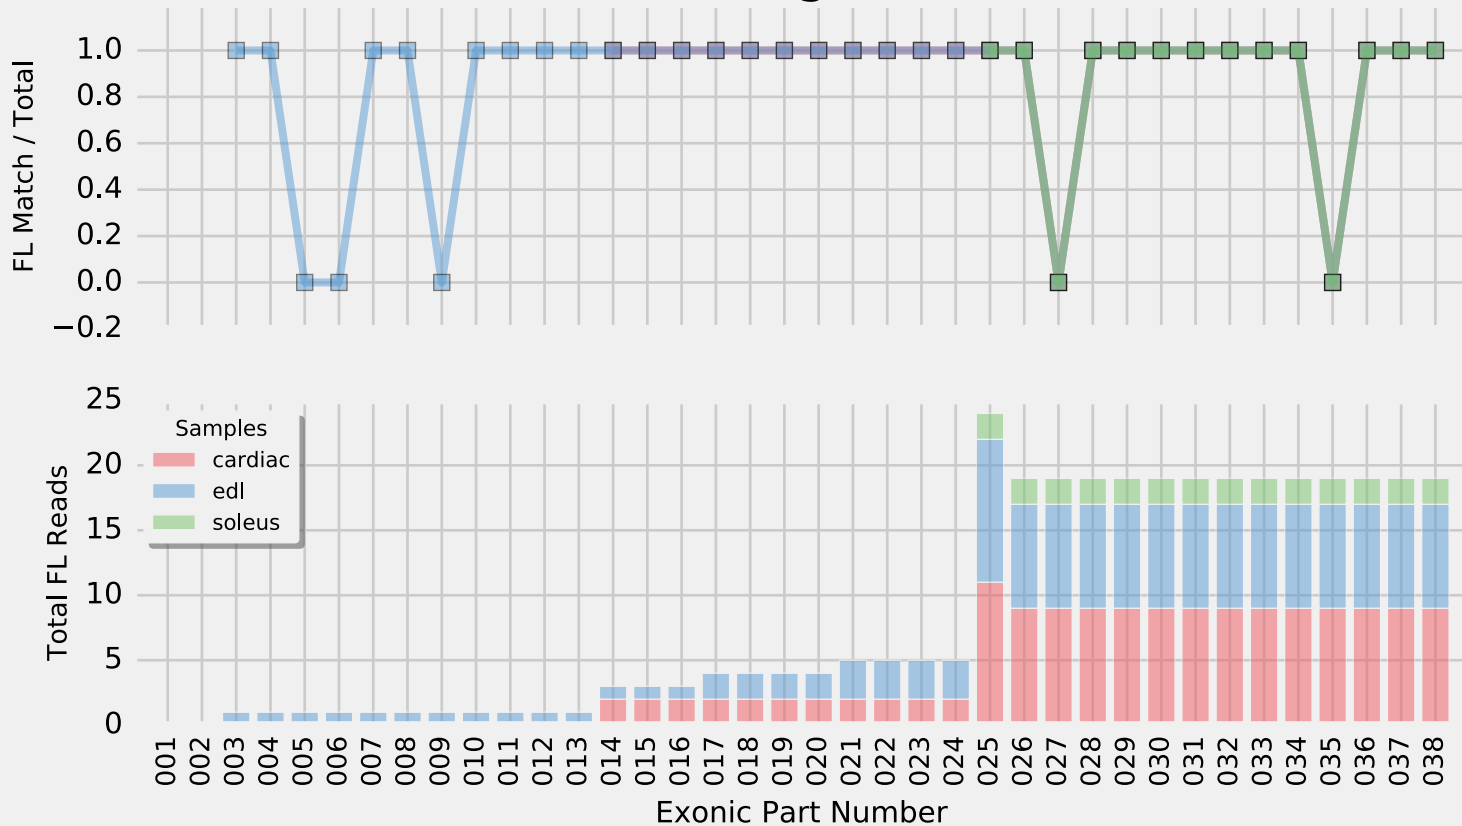

# Gpam

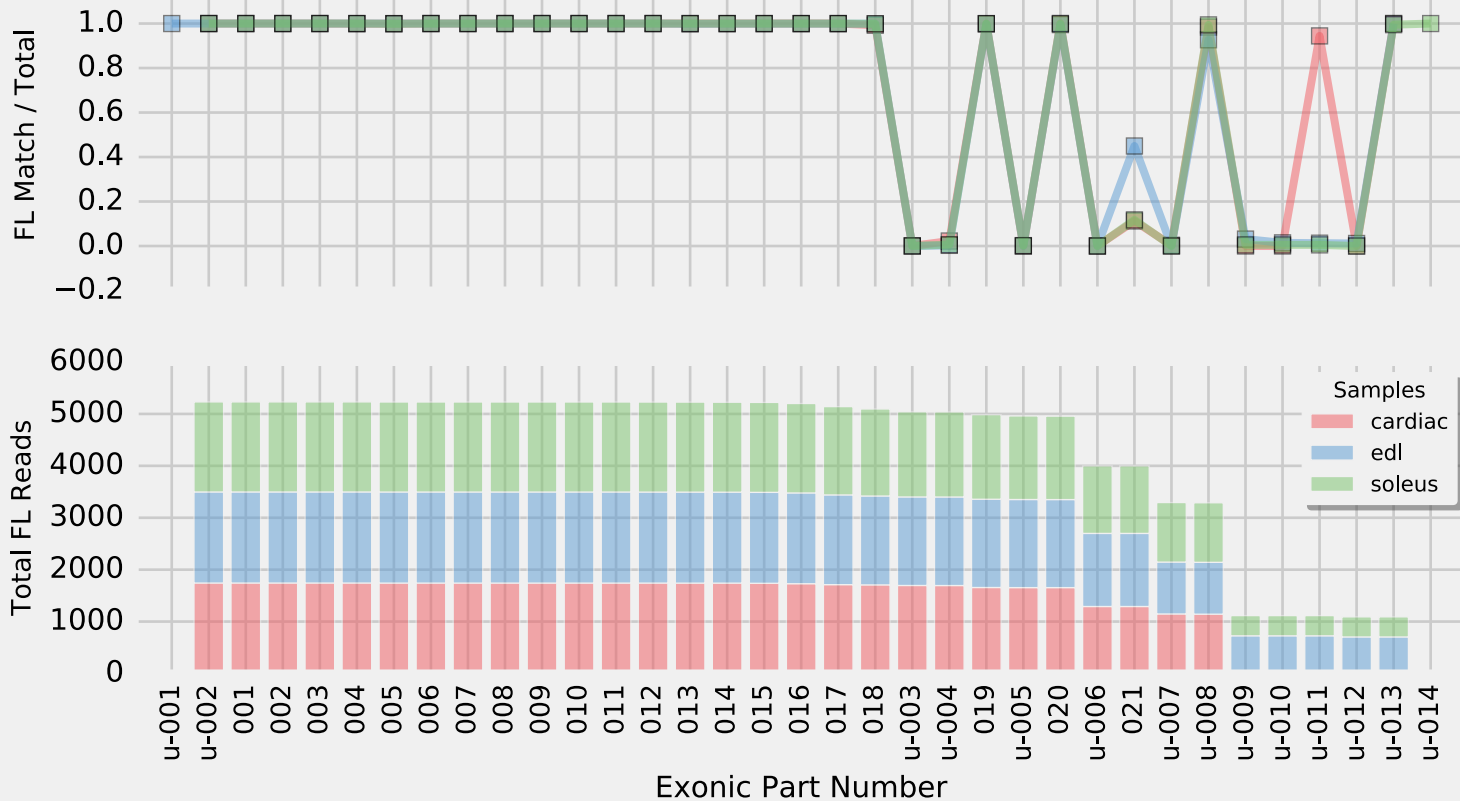

# Gpatch8

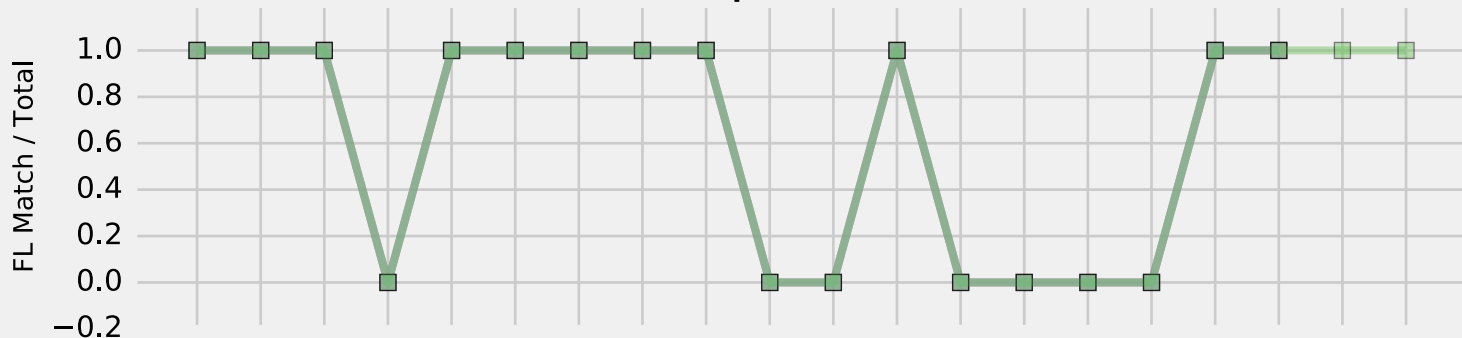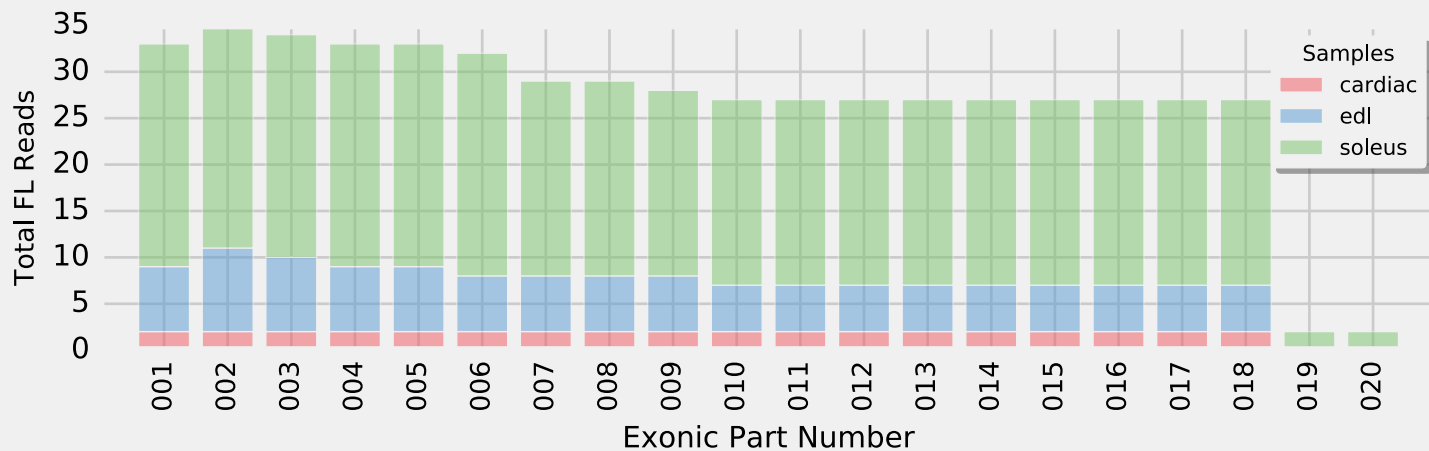



# Gpcpd1

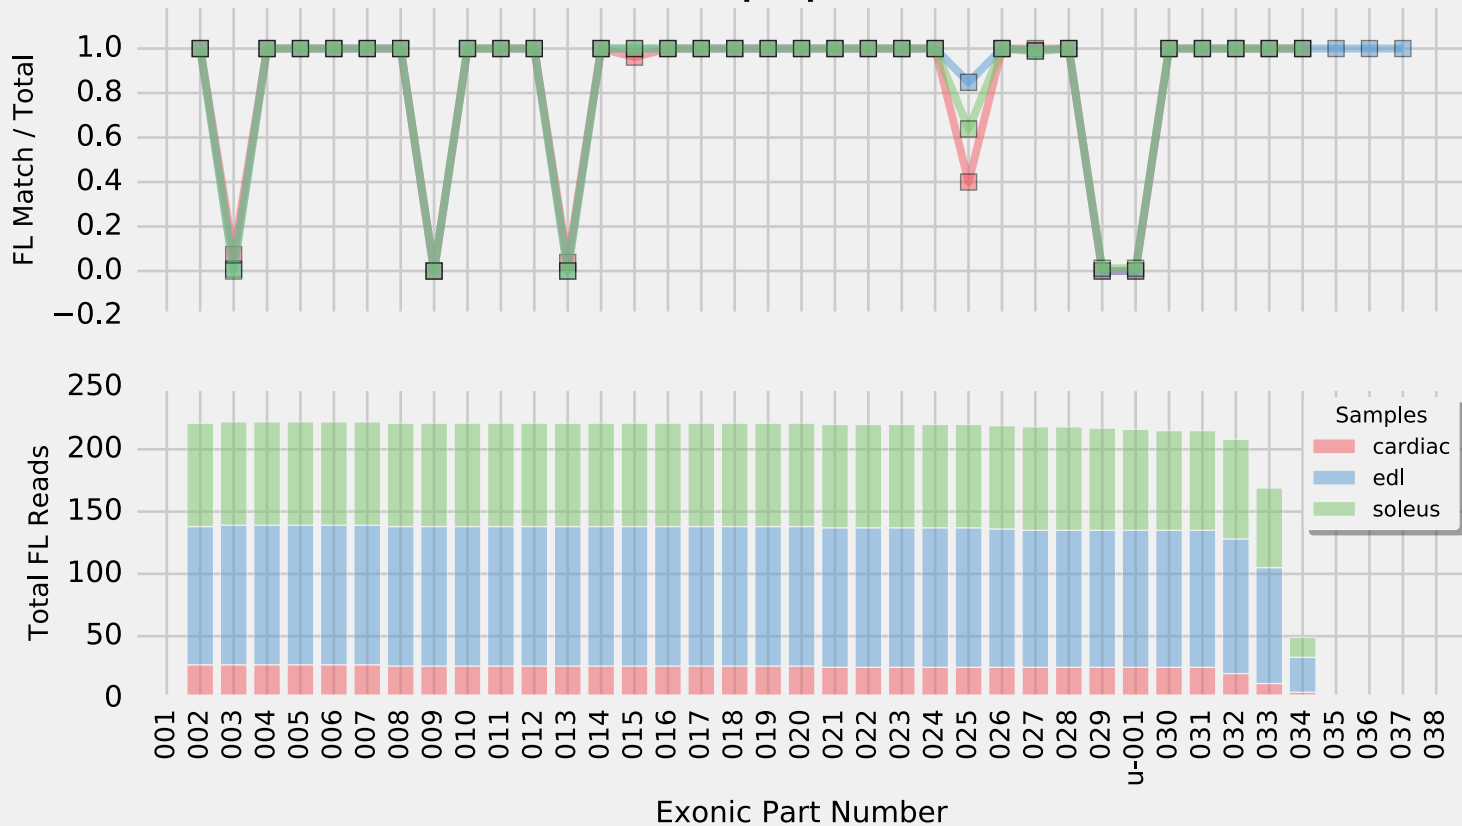

# Grb10

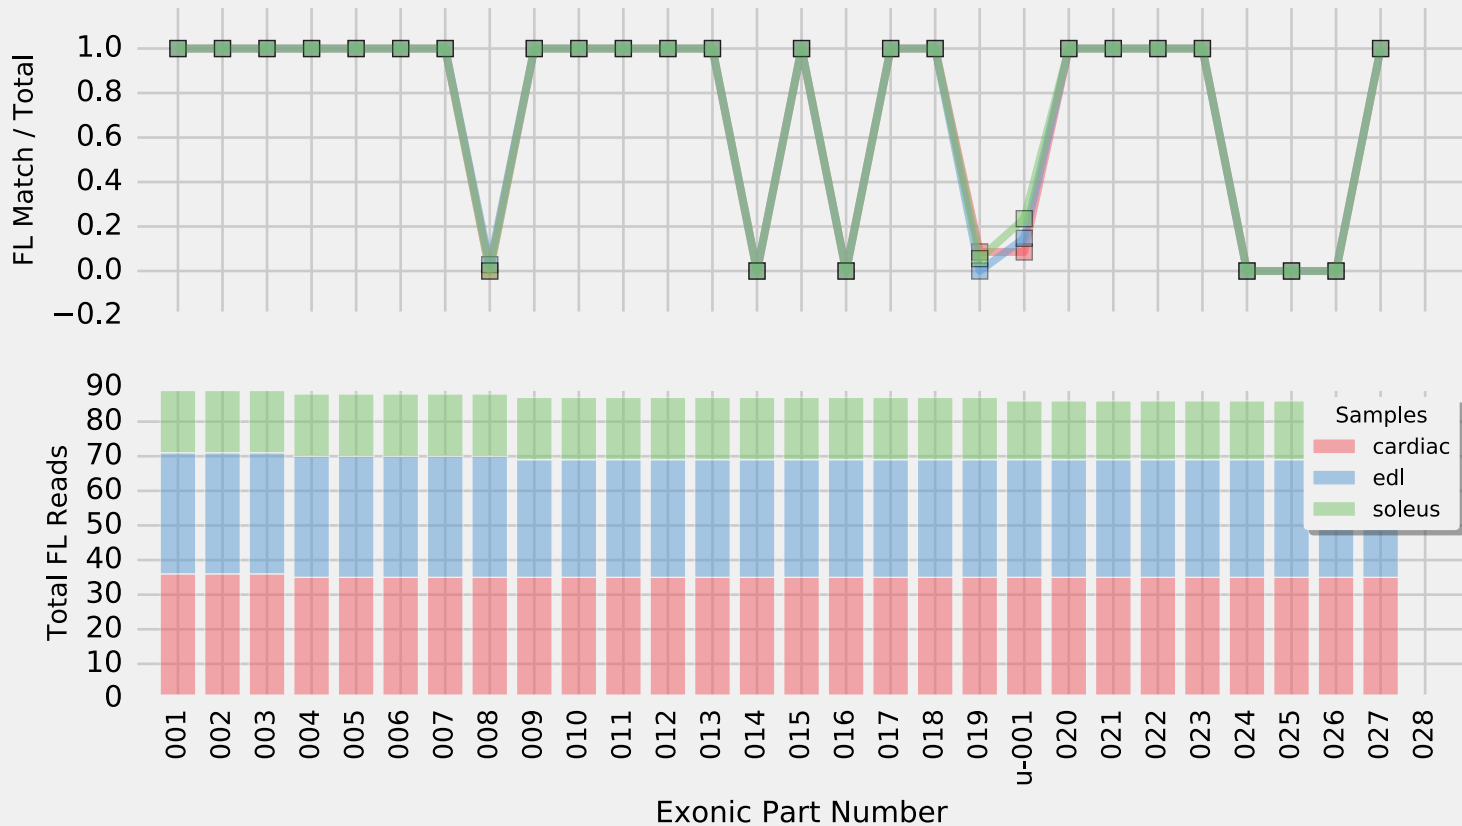

# Gspt1

FL Match / Total

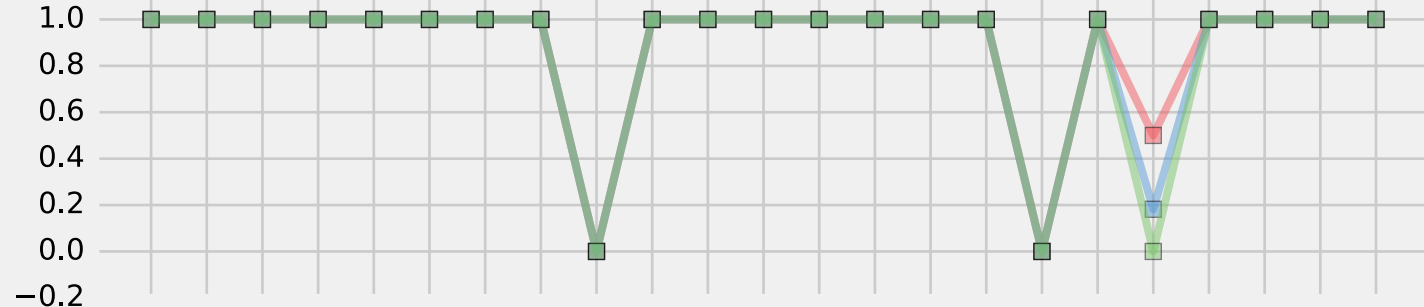

Total FL Reads

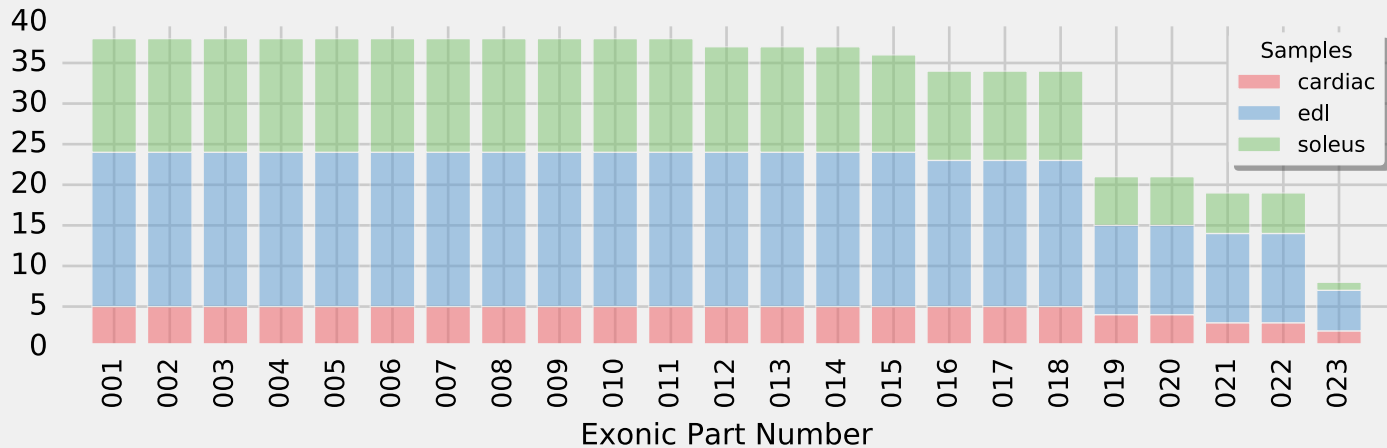

# Gtf2a1

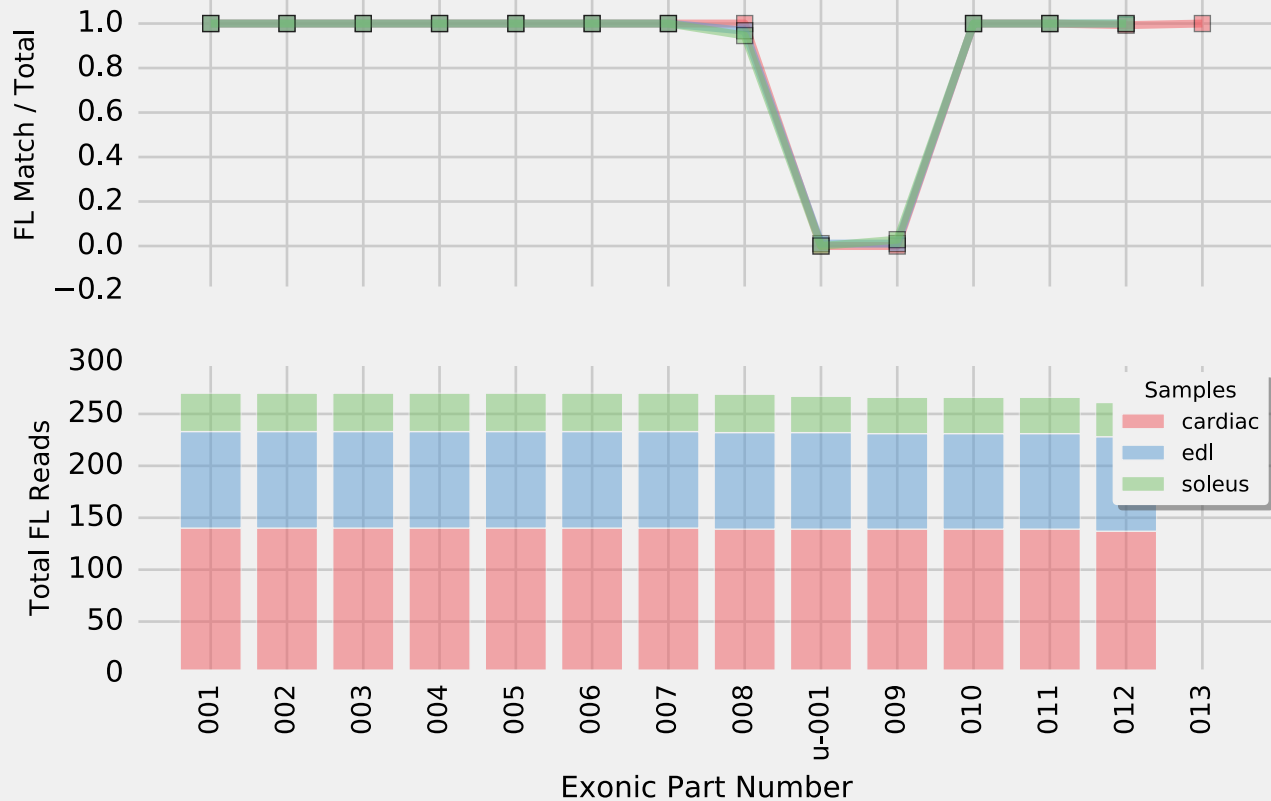

# Gtf3c1

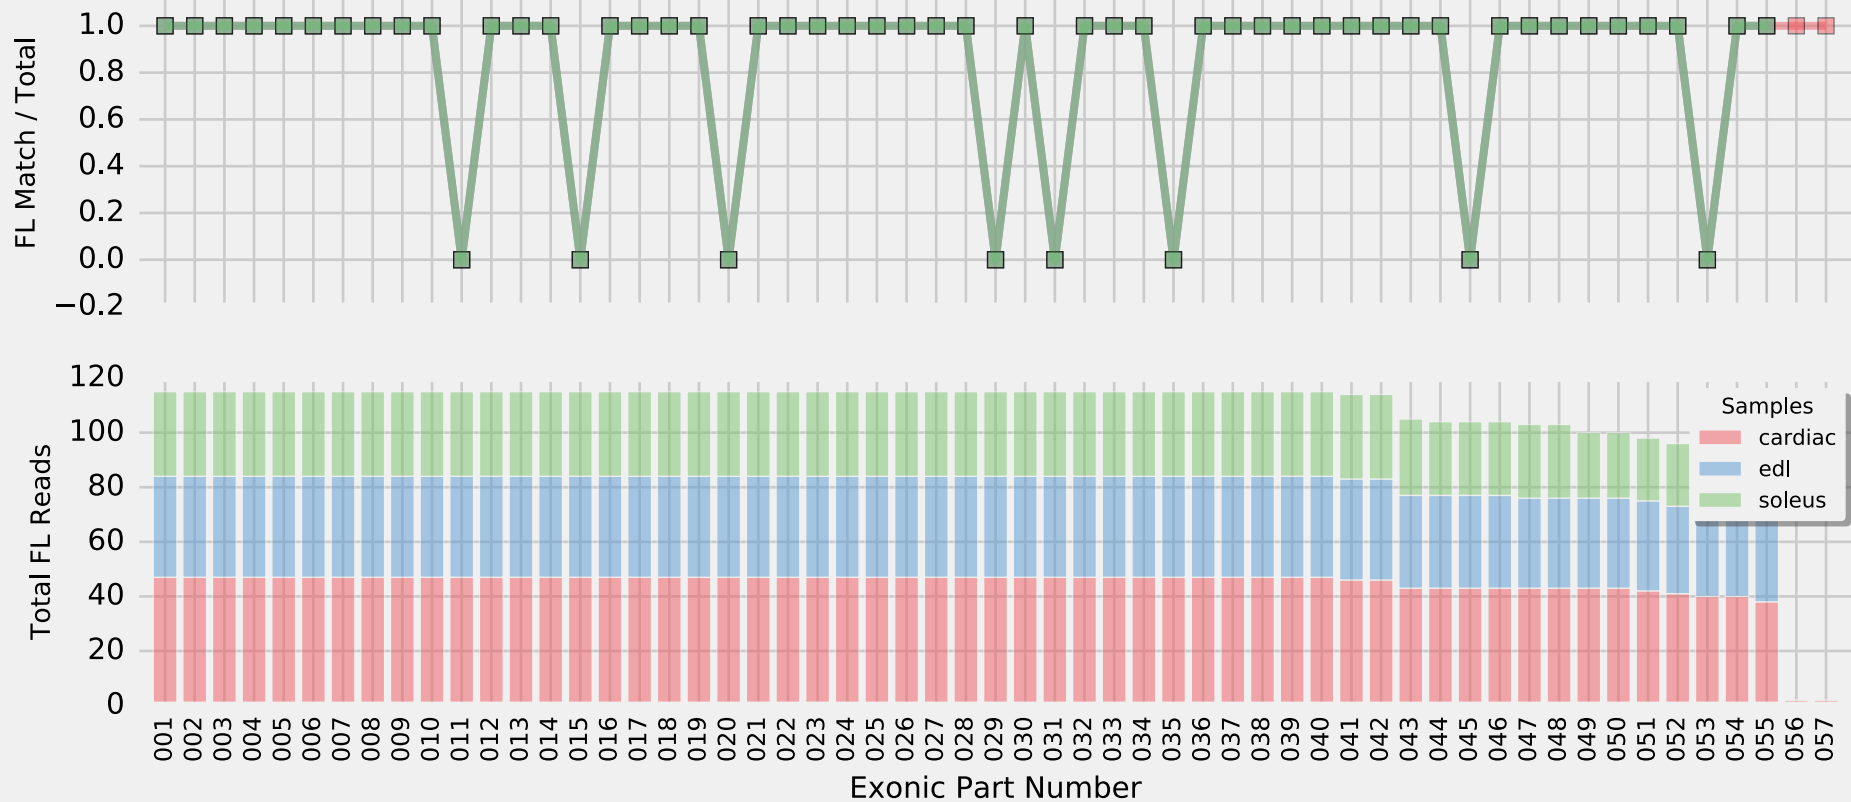

# Gtf3c4

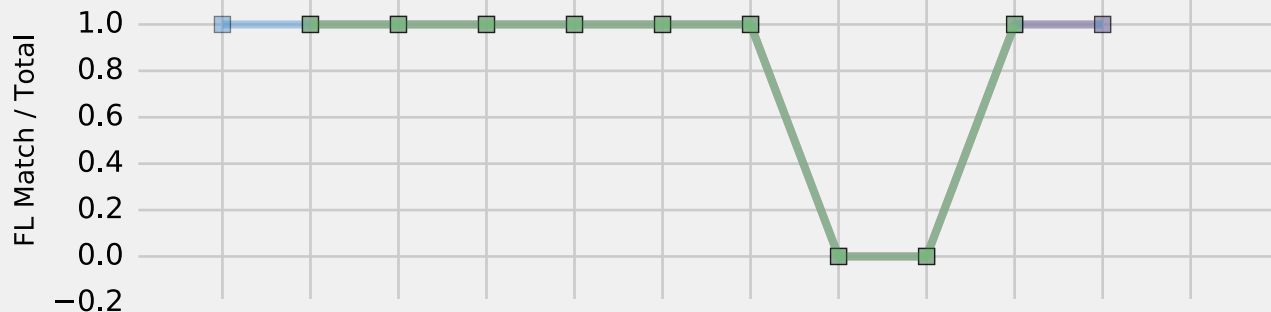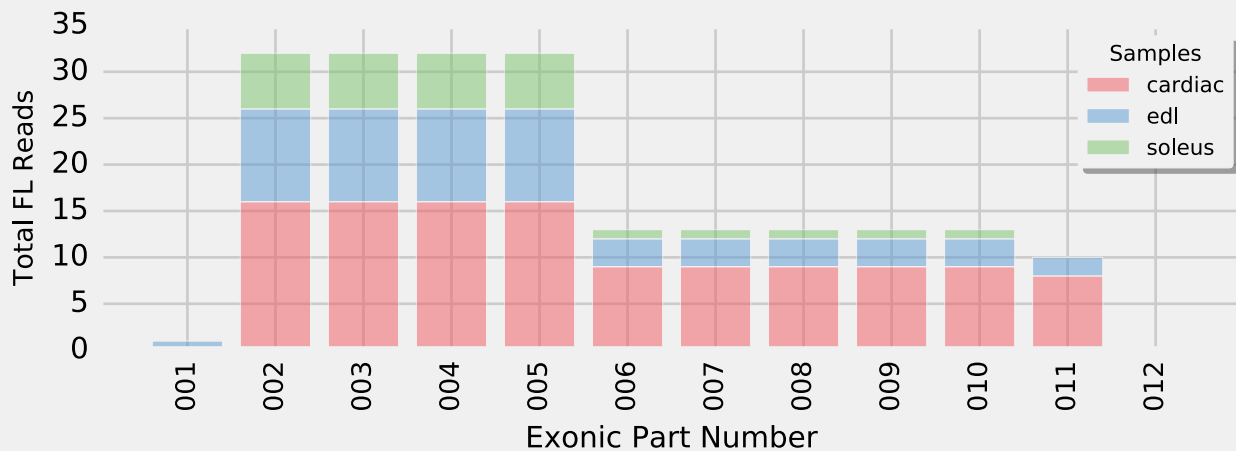

# Gvin1

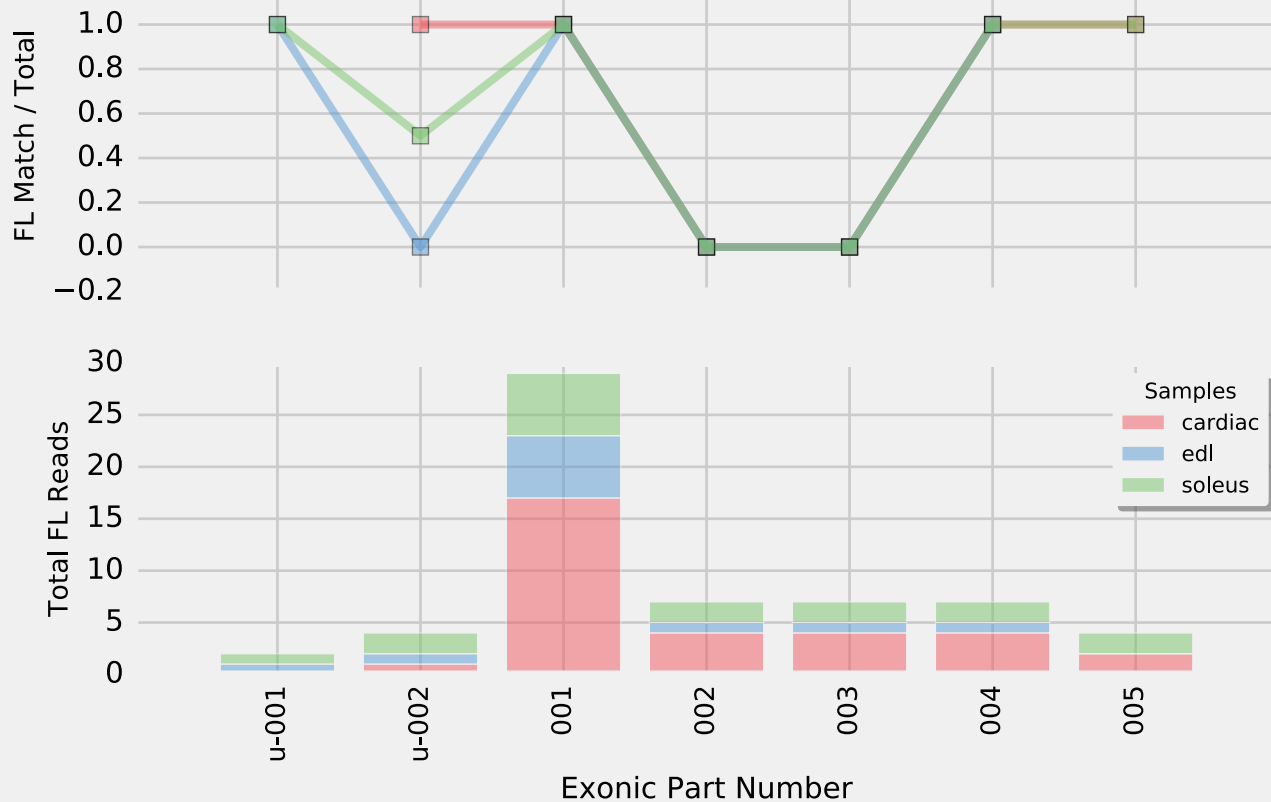

# Hdhd2

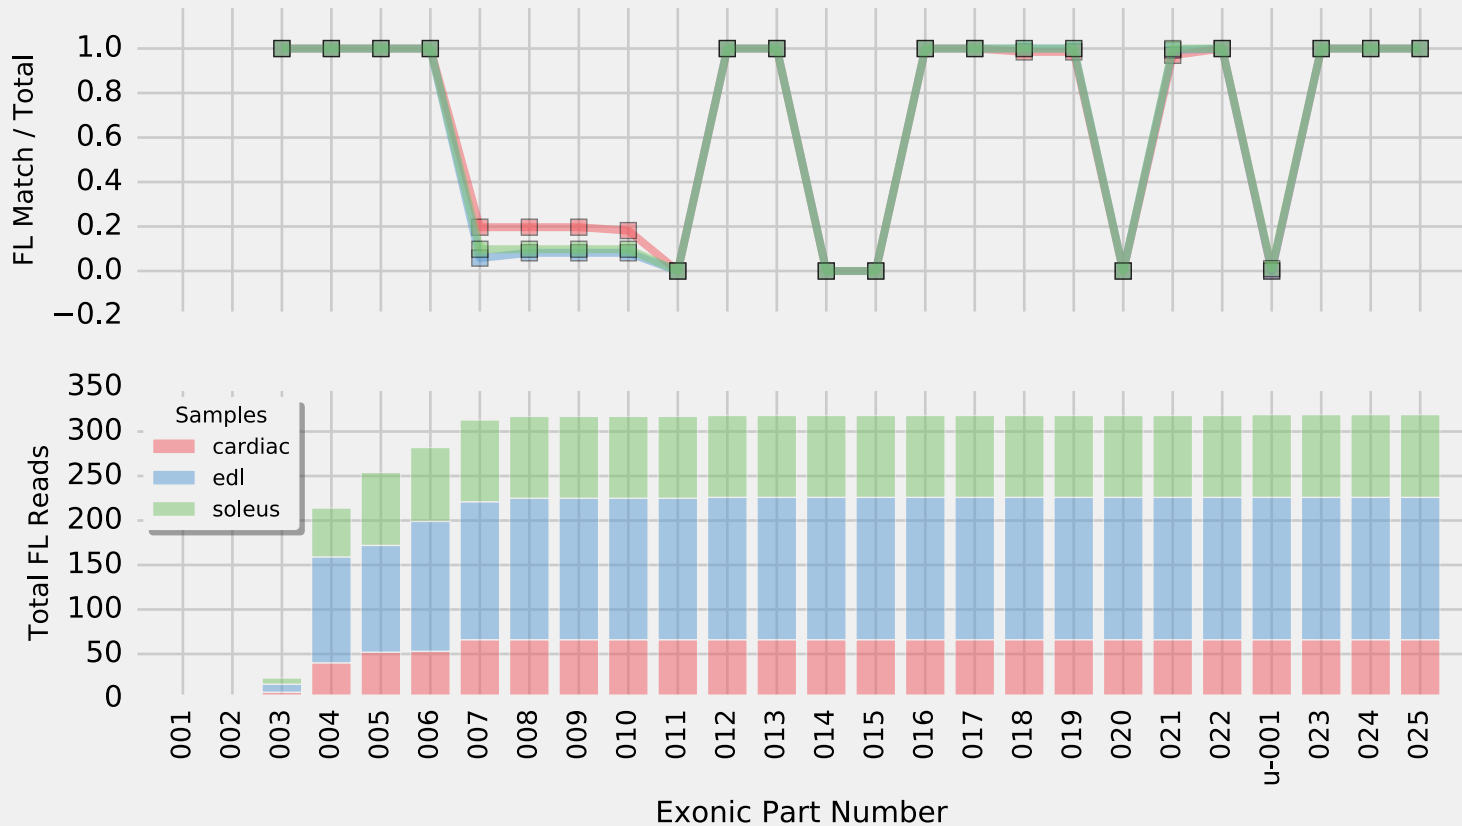



# Hdlbp

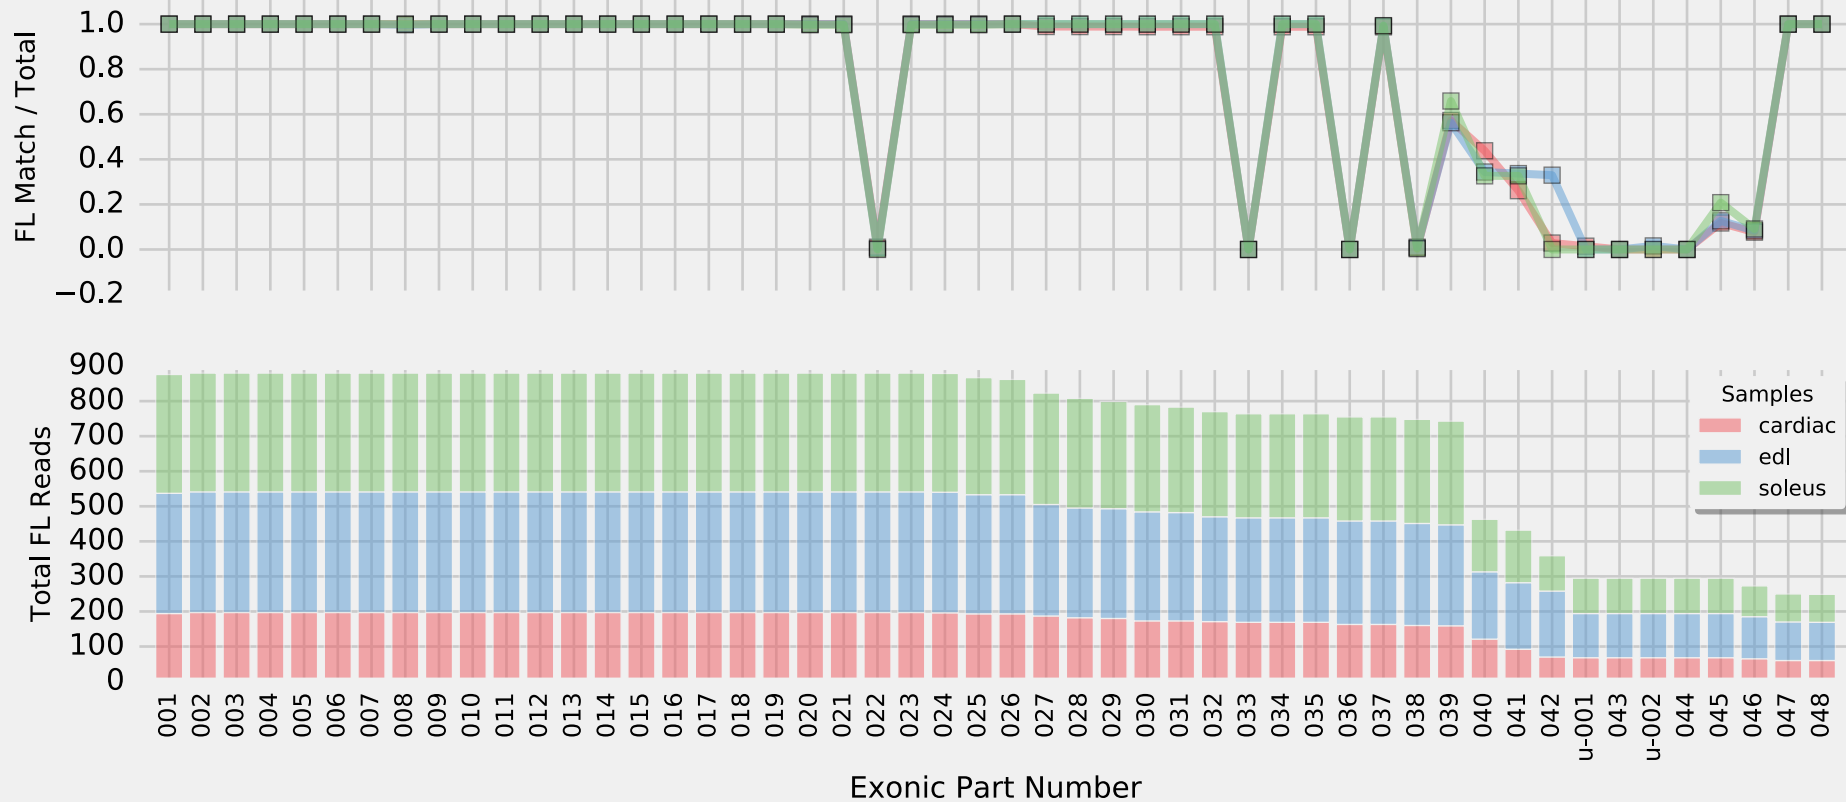

# Heatr1

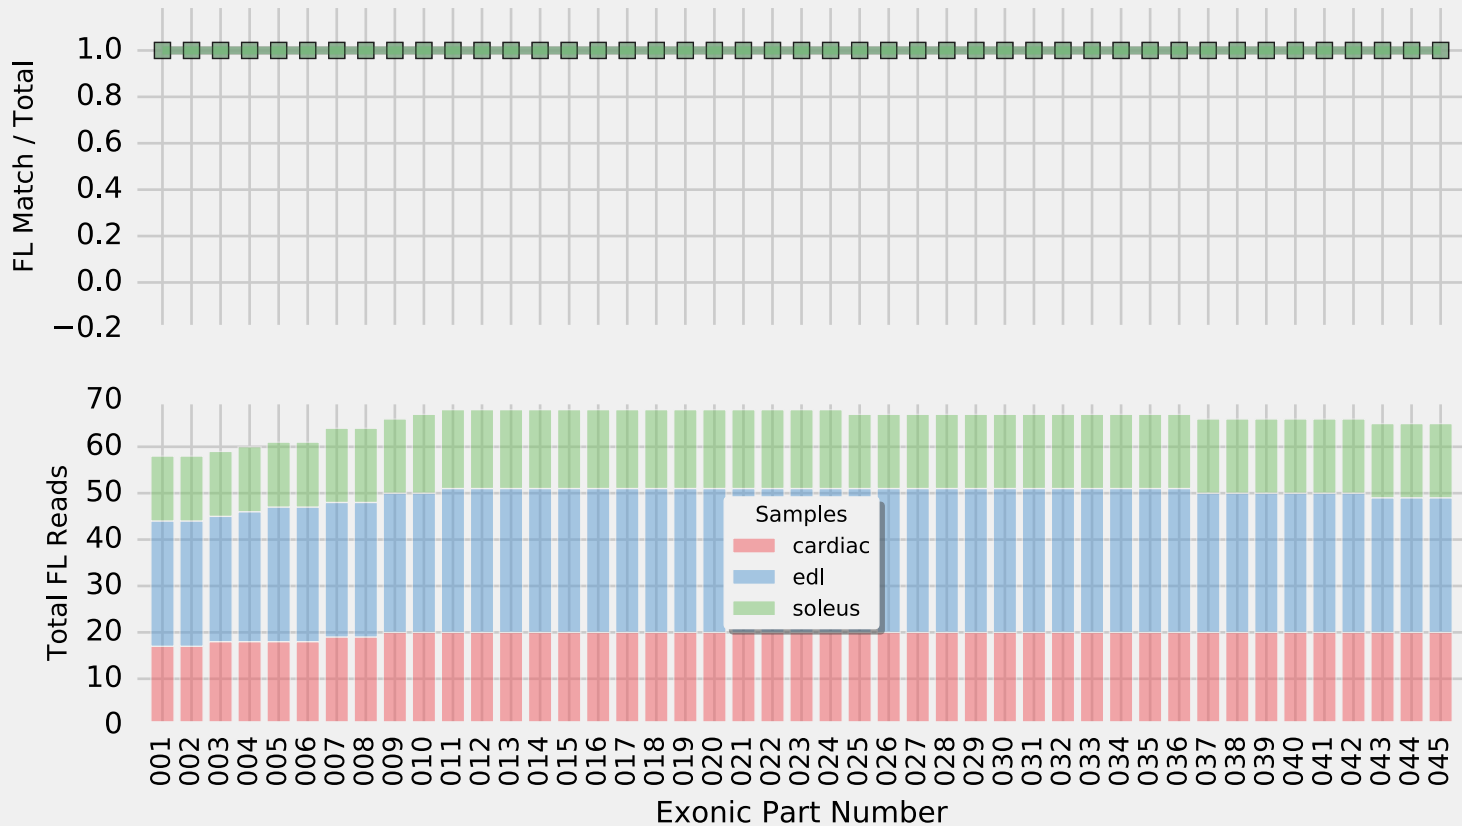

# Hectd1

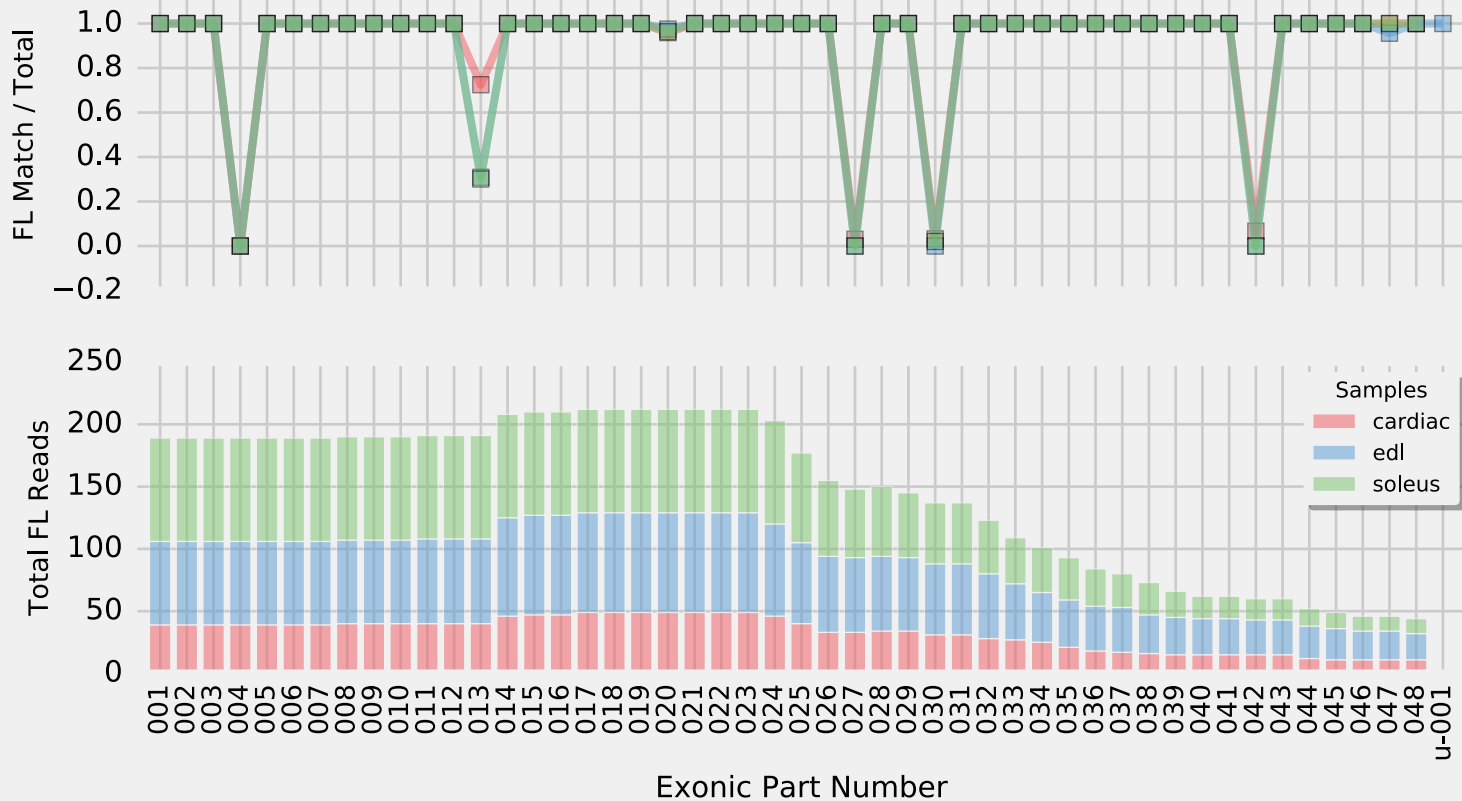

# Heg1

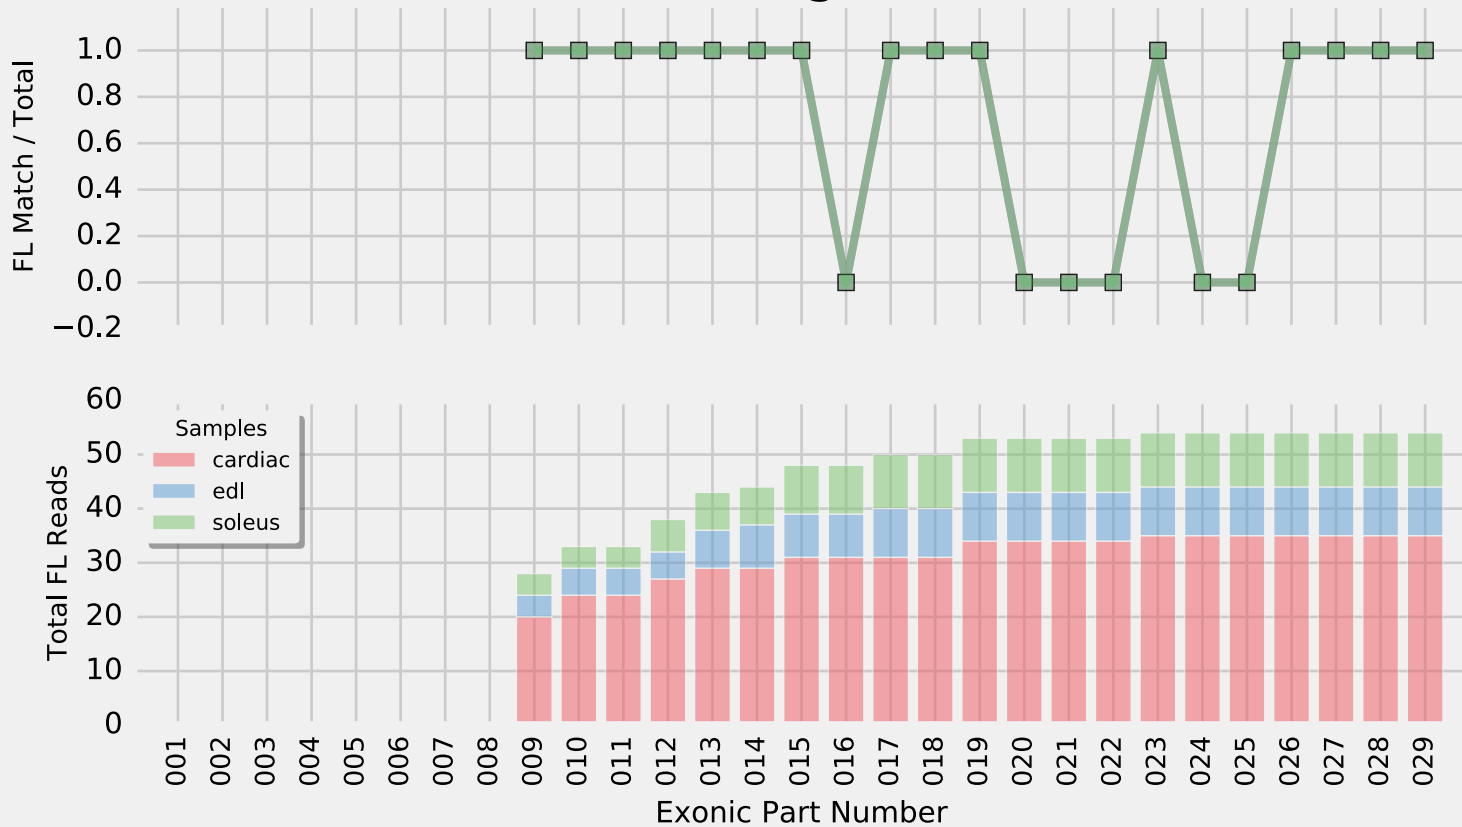

# Helz

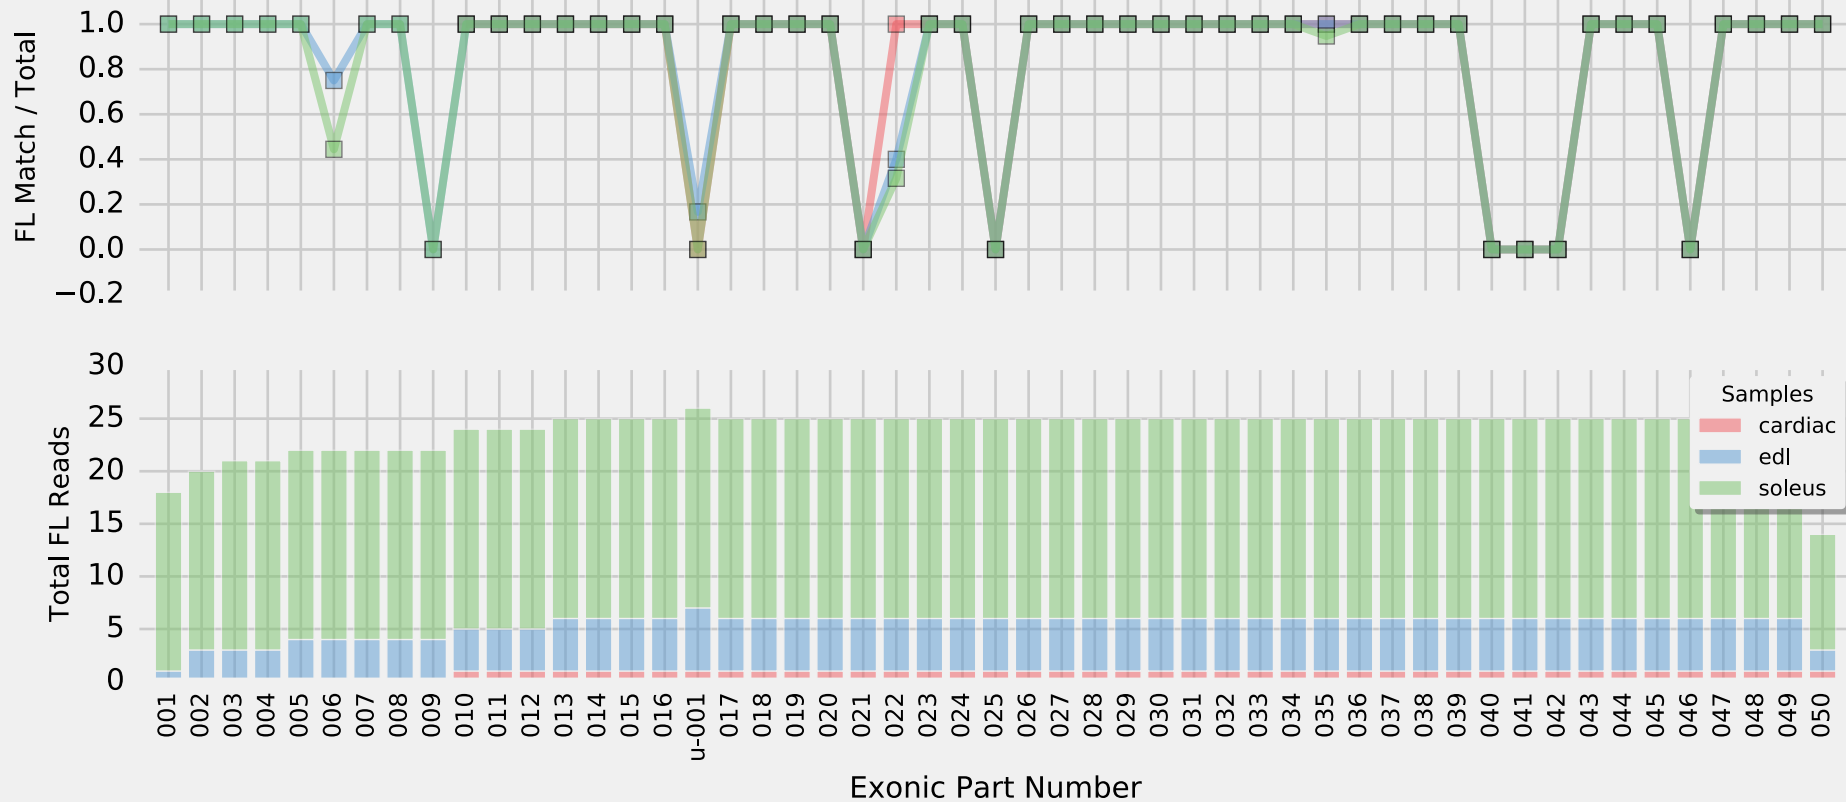

# Herc1

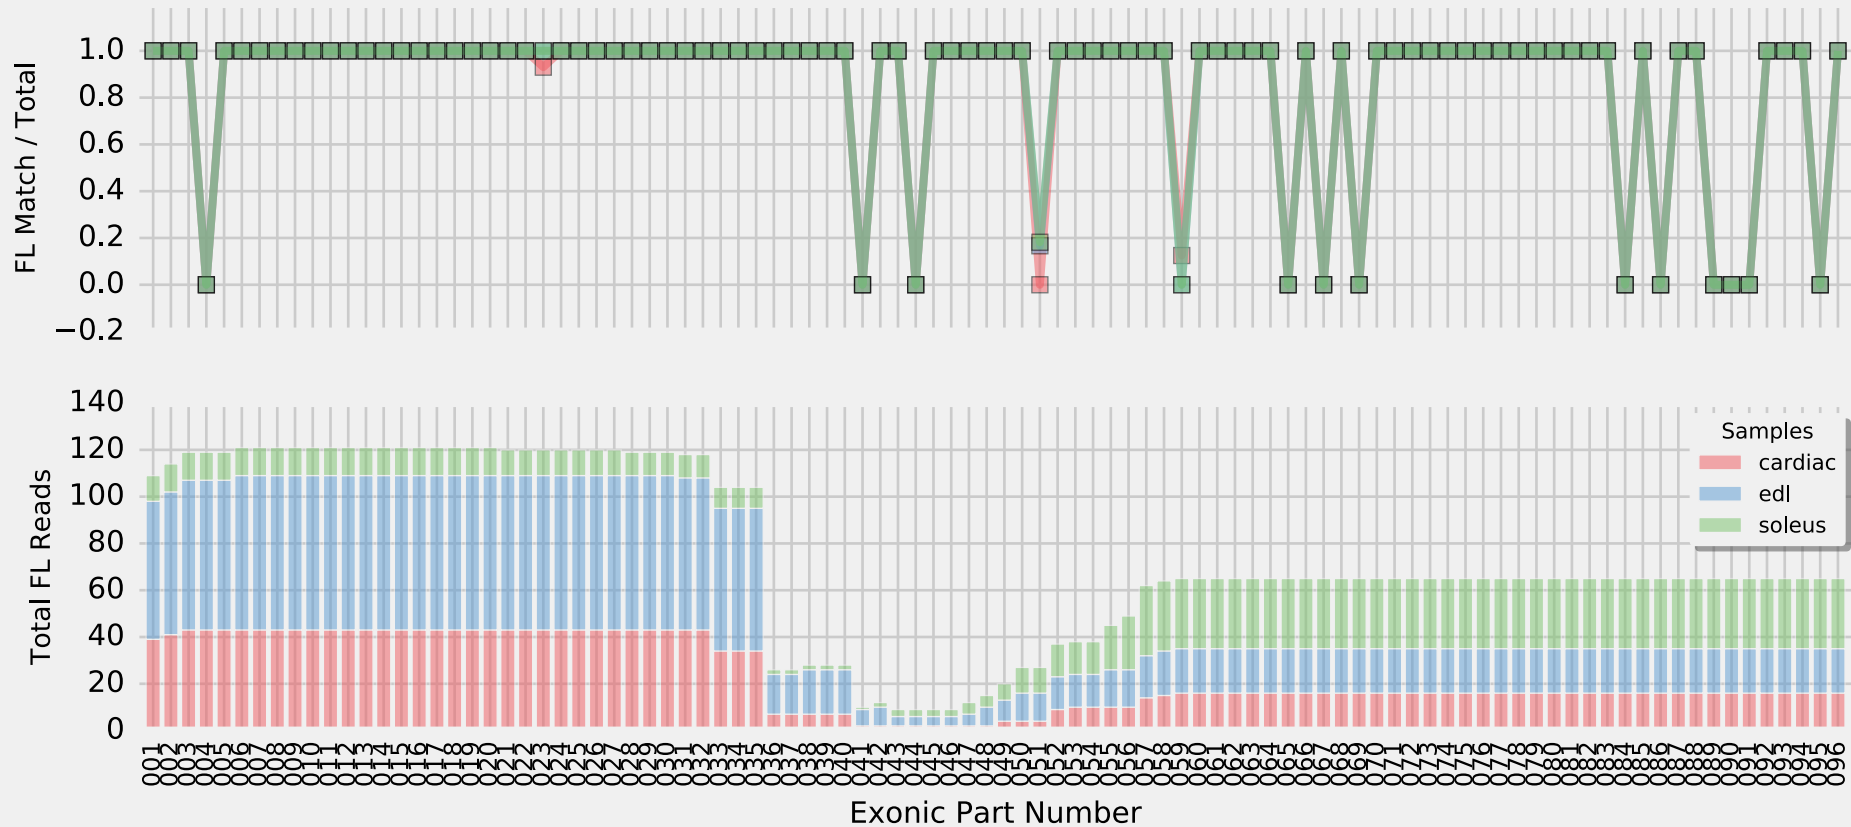

# Herc2

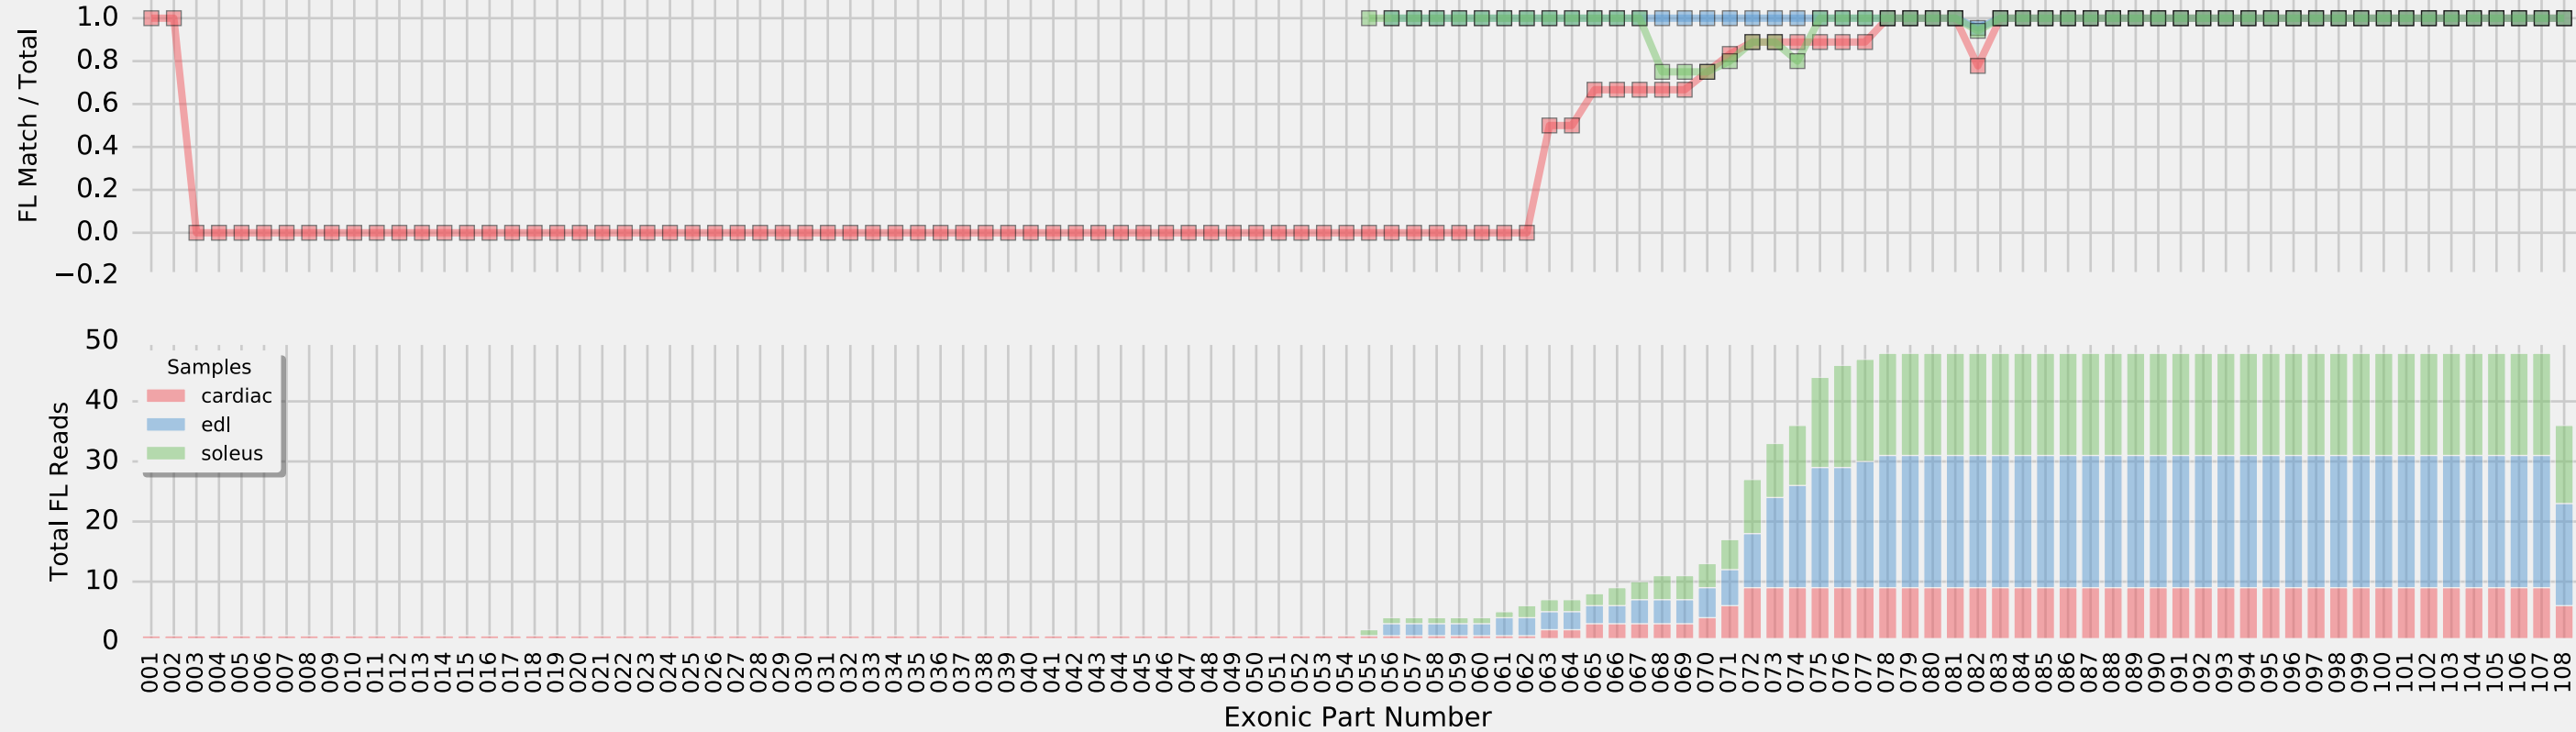

# Hif1an

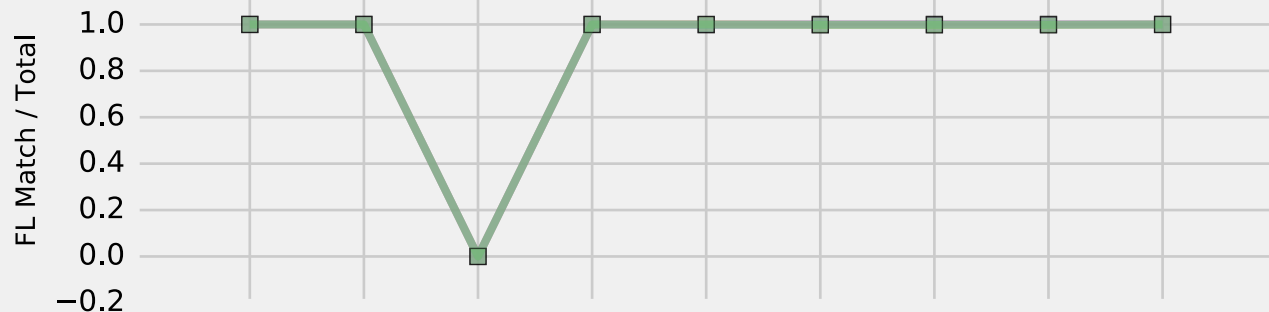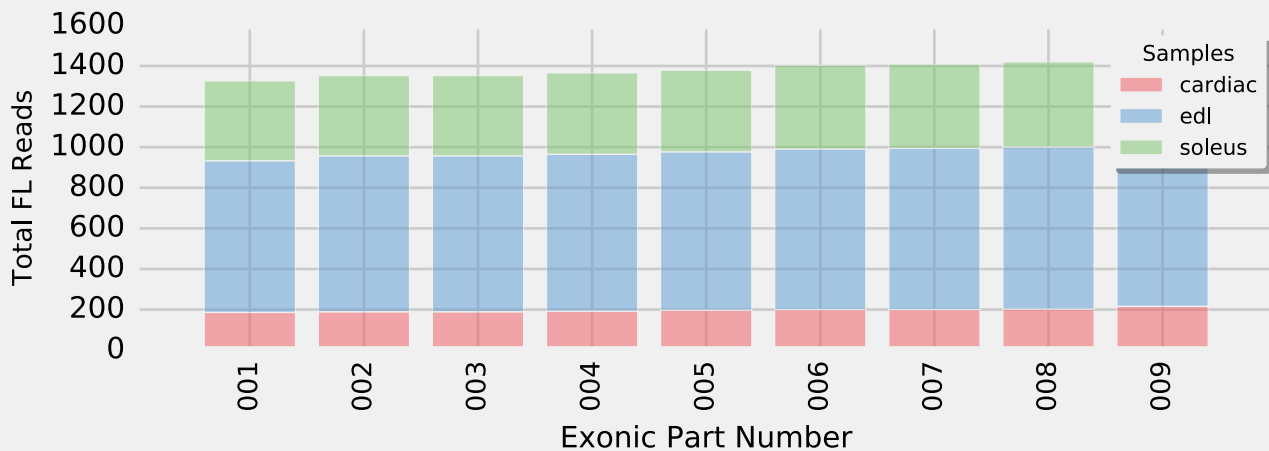



# Hipk1

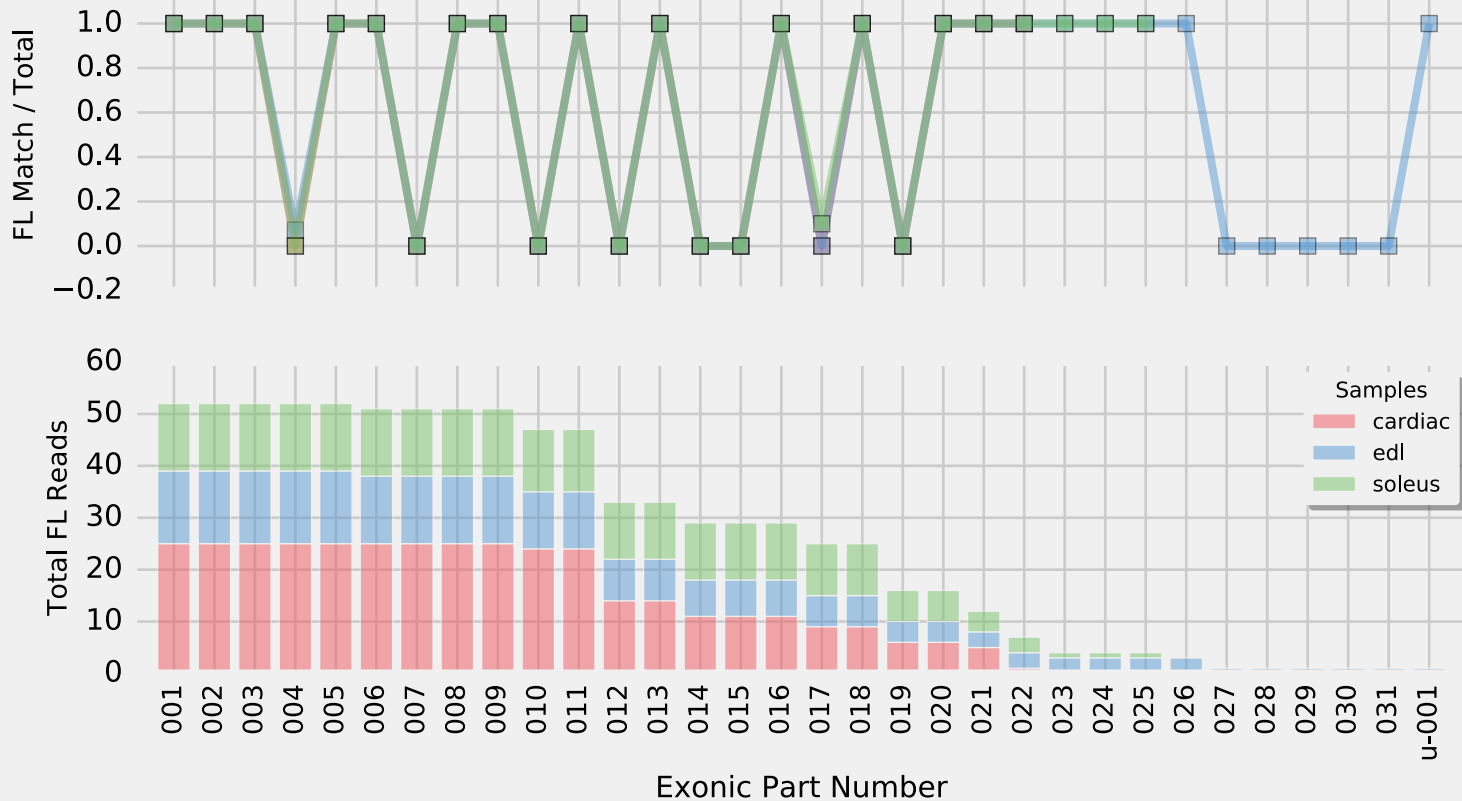

# Hivep2

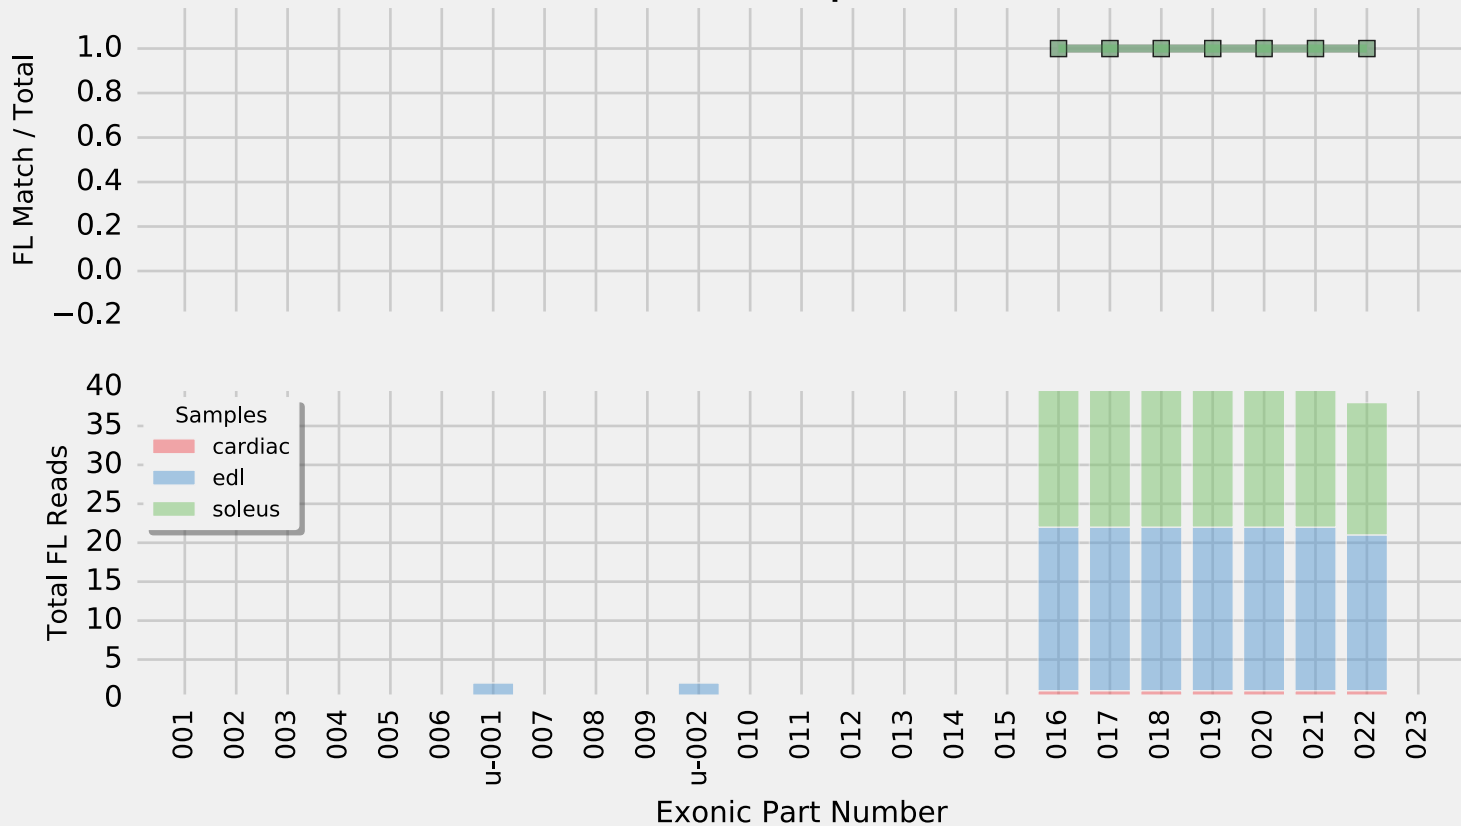

# Hk2

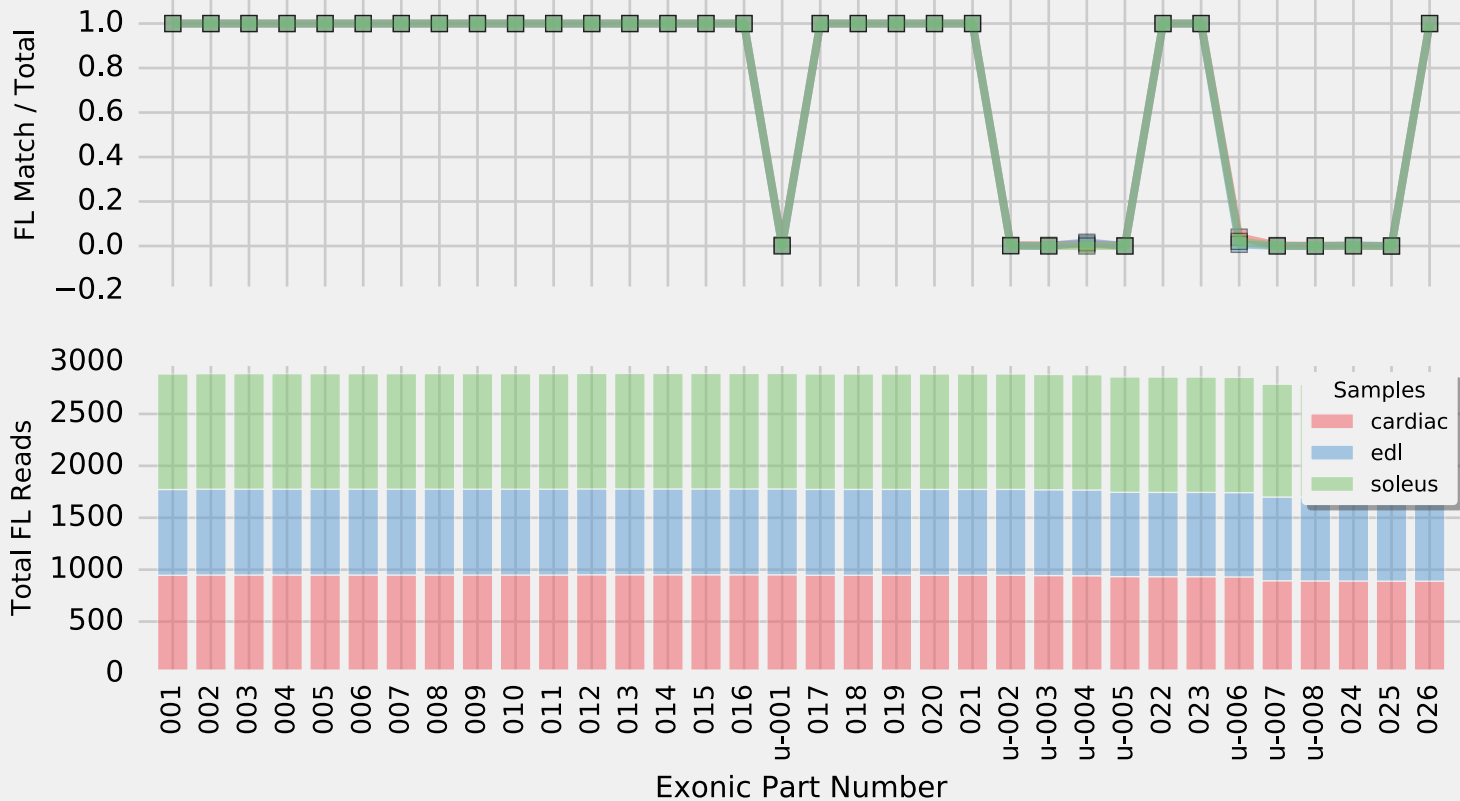

# Hook1

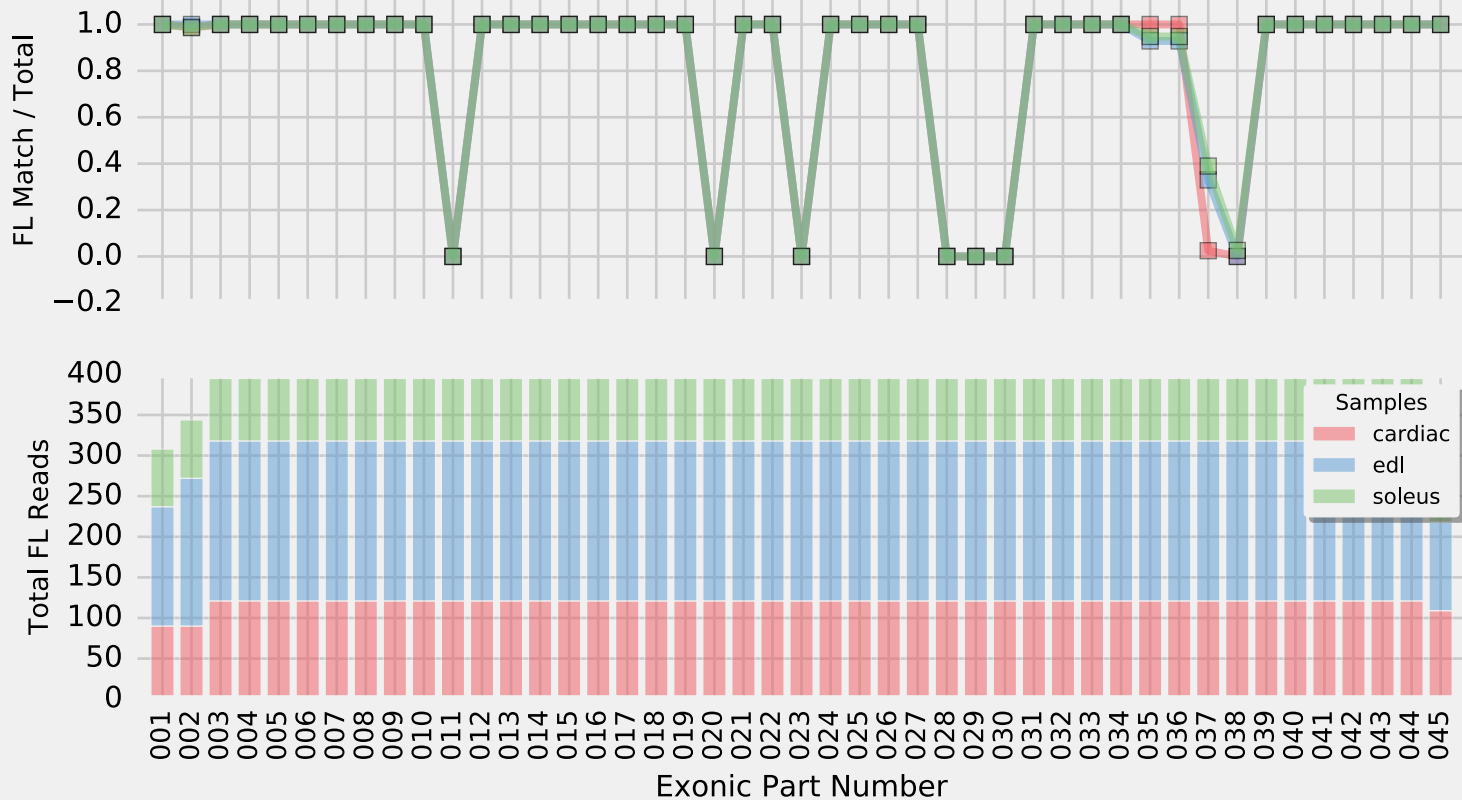

# Hook3

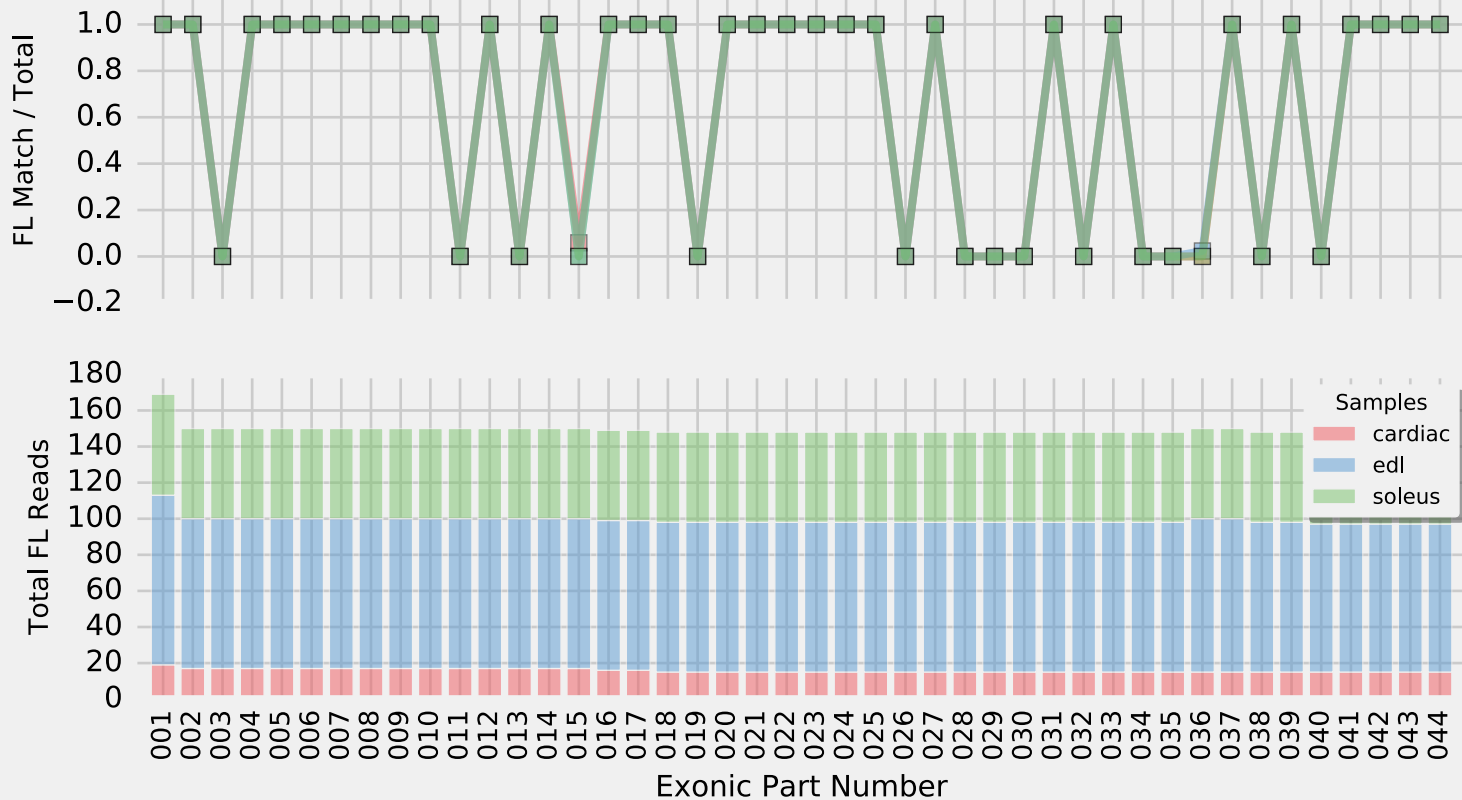

# Hr

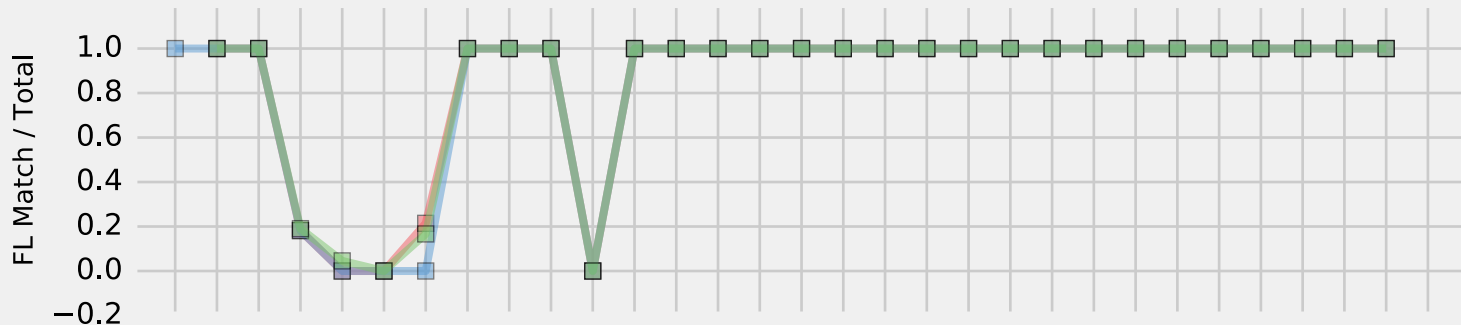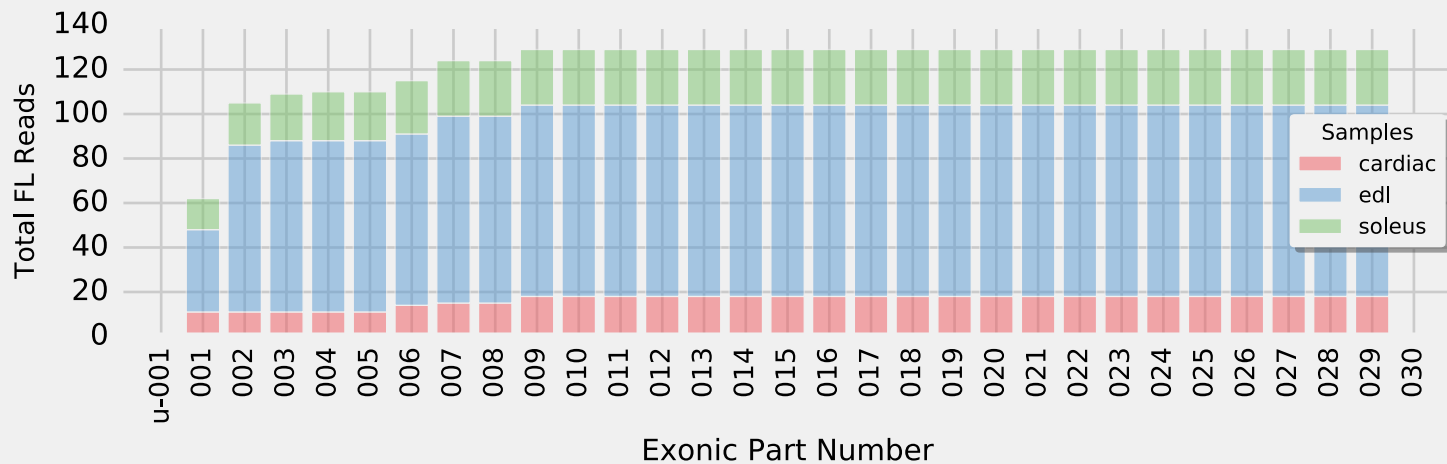

# Hspa12a

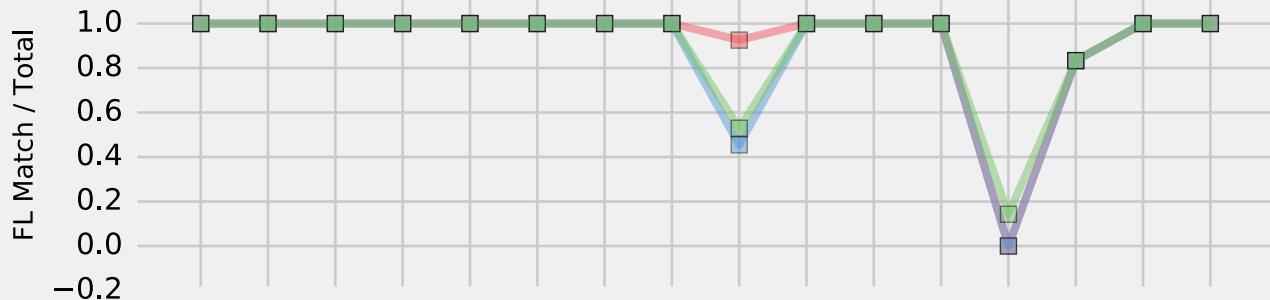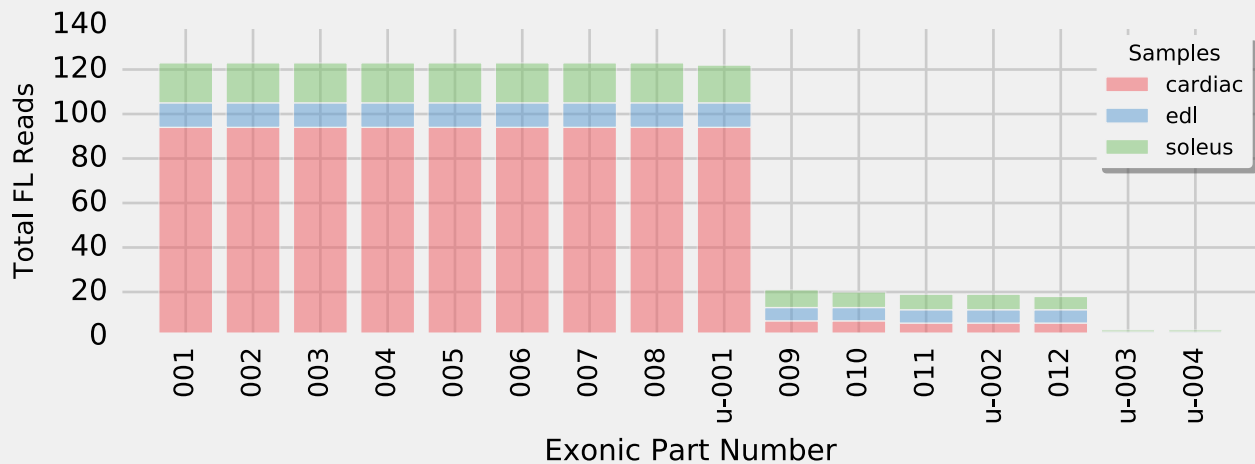

# Huwe1

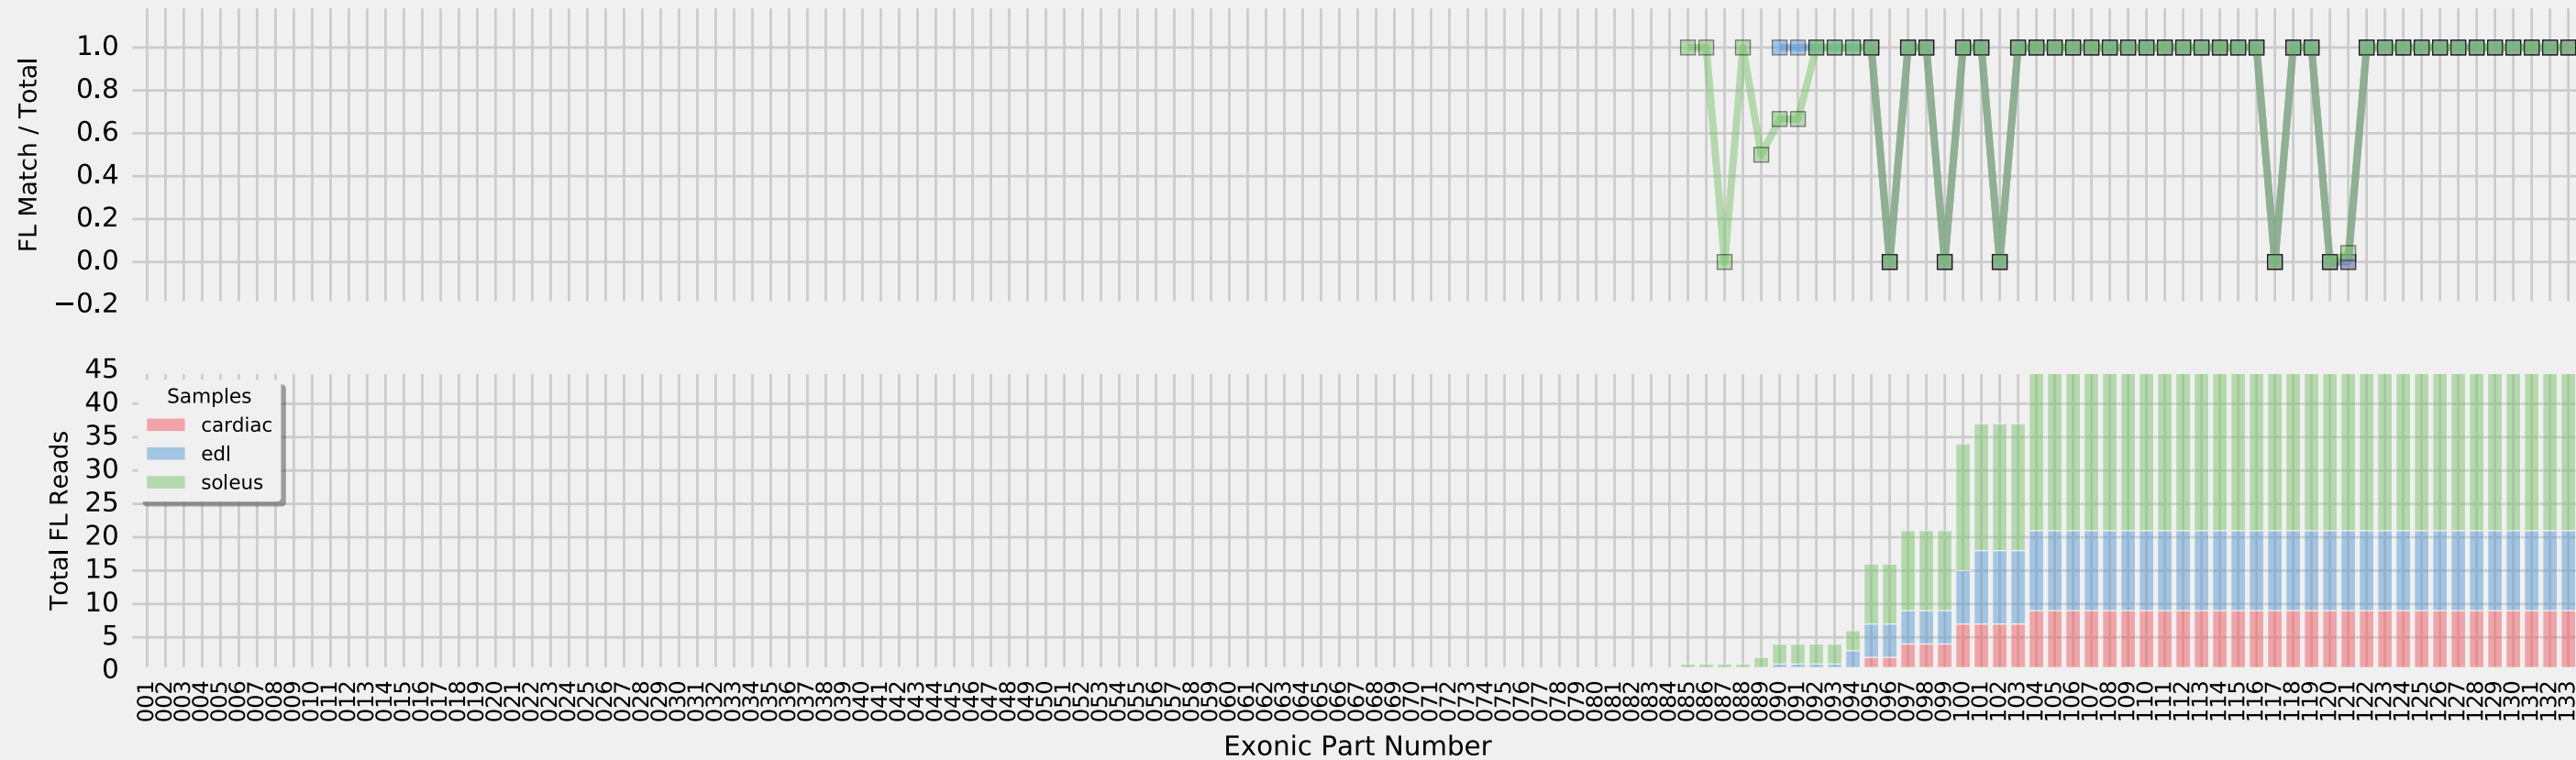



# Ibtk

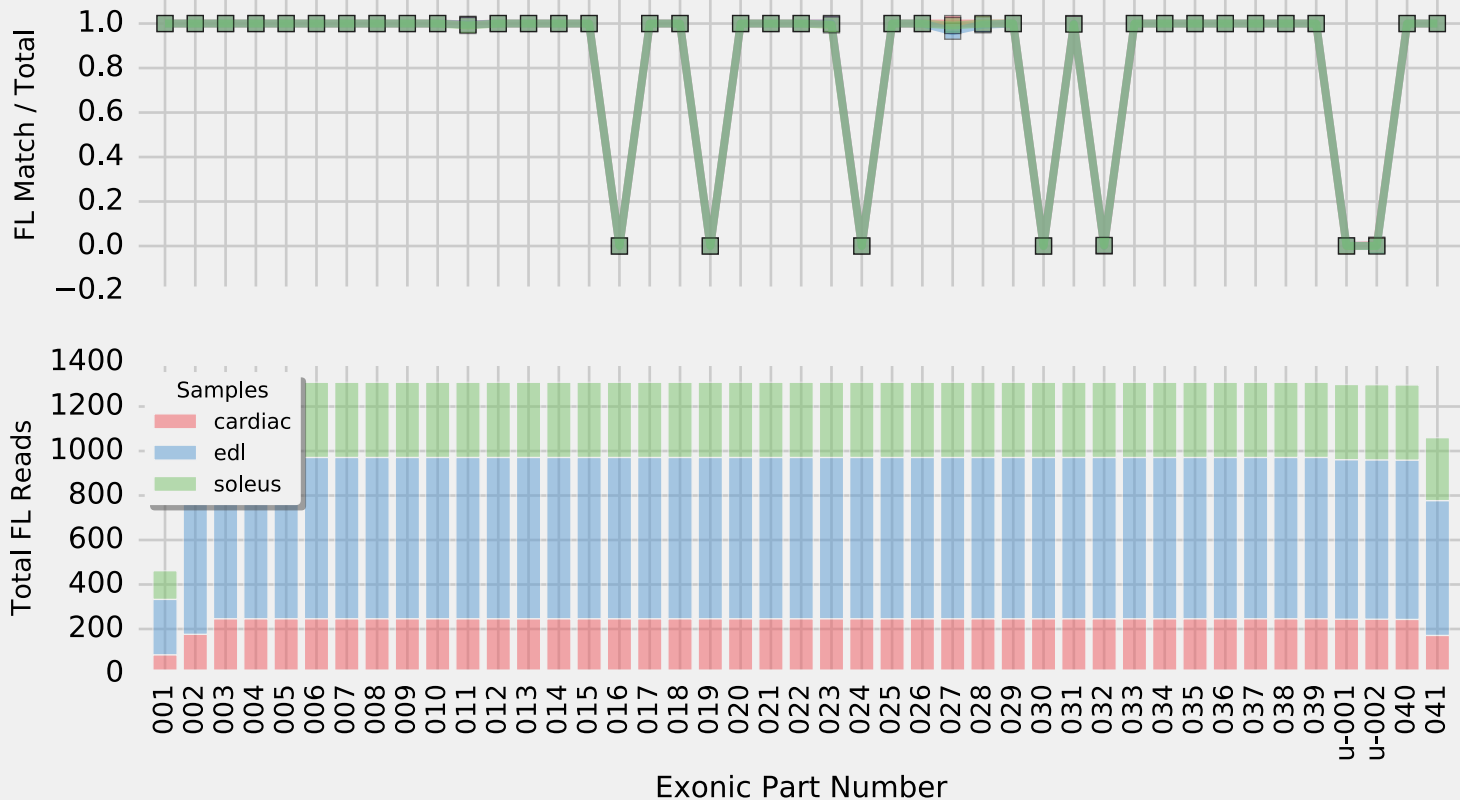

# Ide

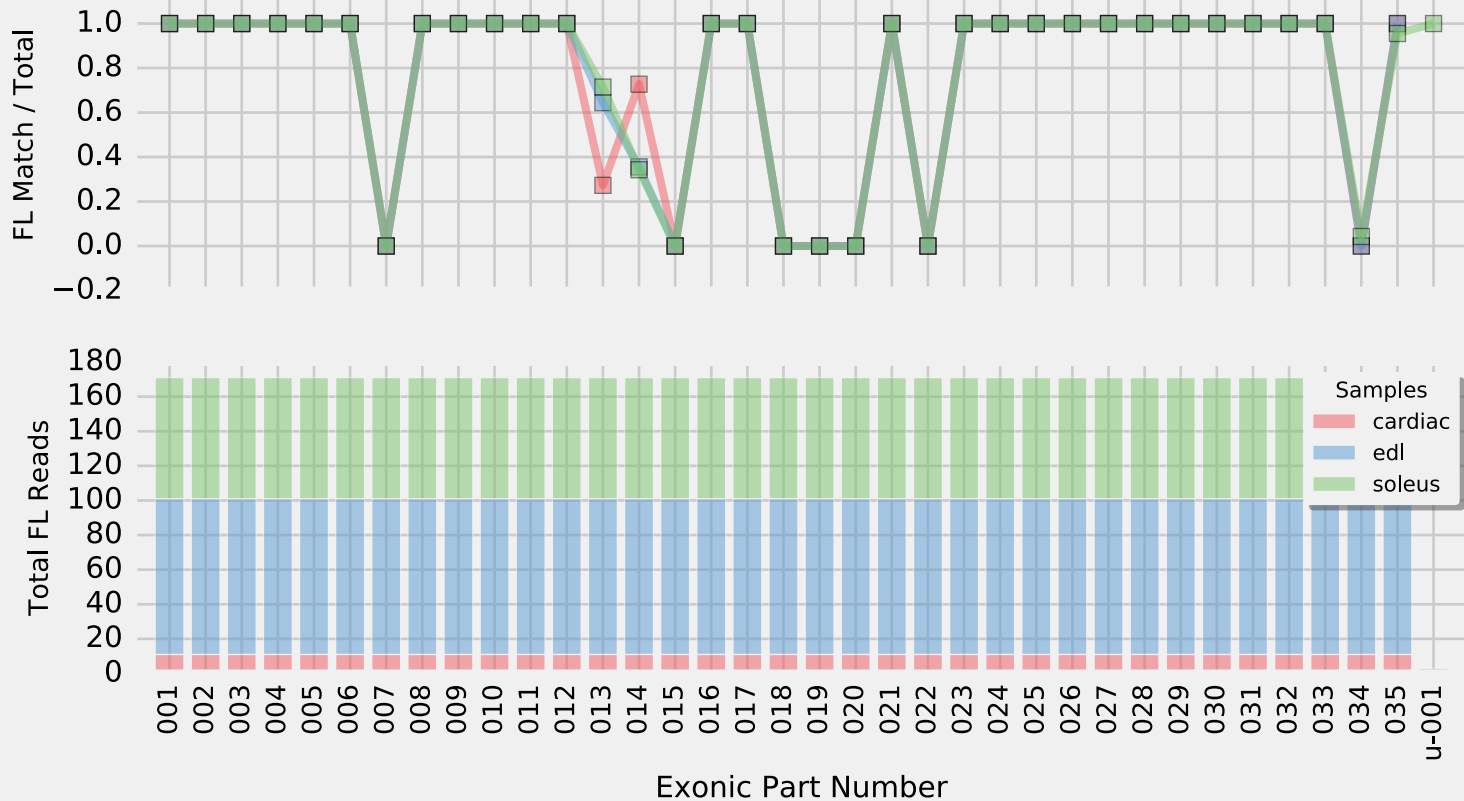

# Ift172

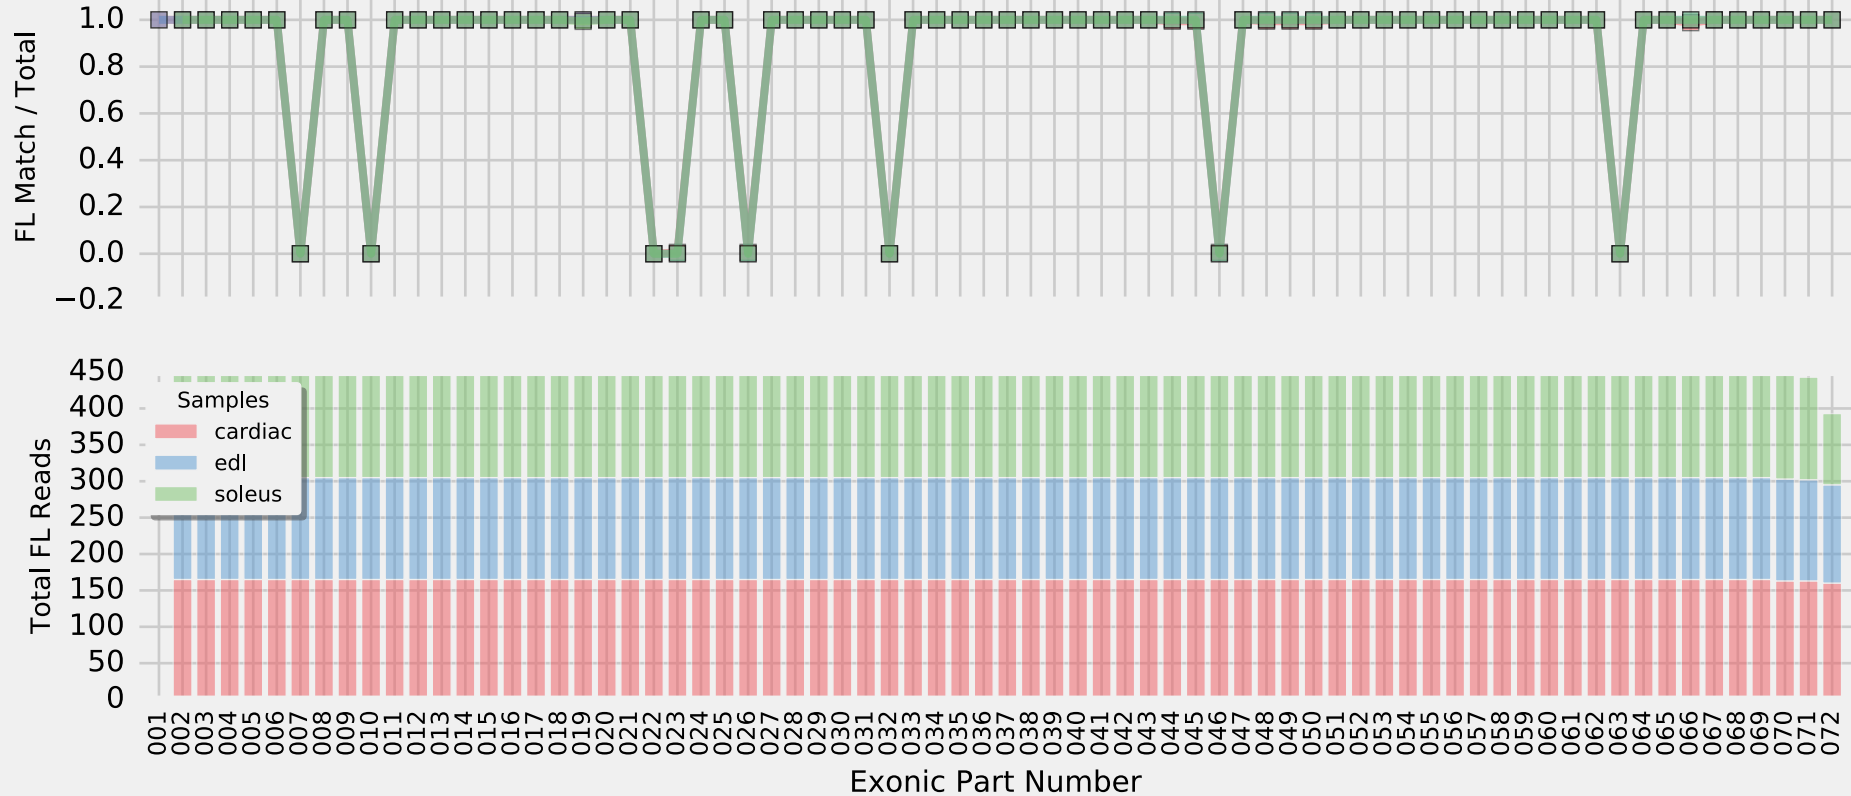

# Igdcc4

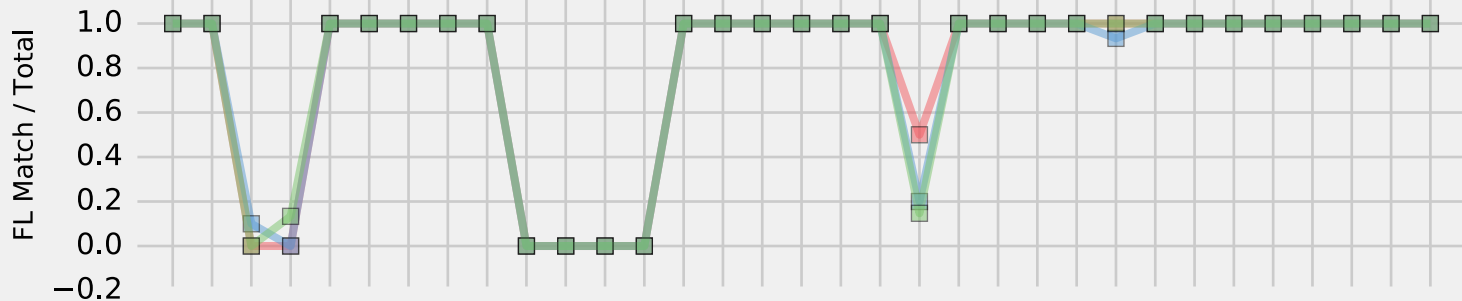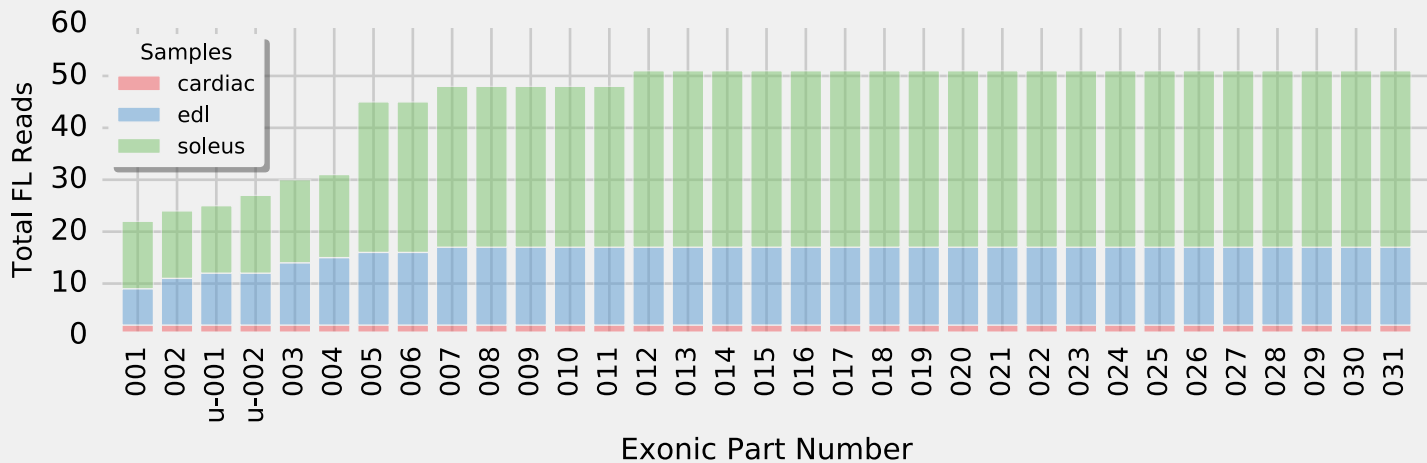

# Igf2r

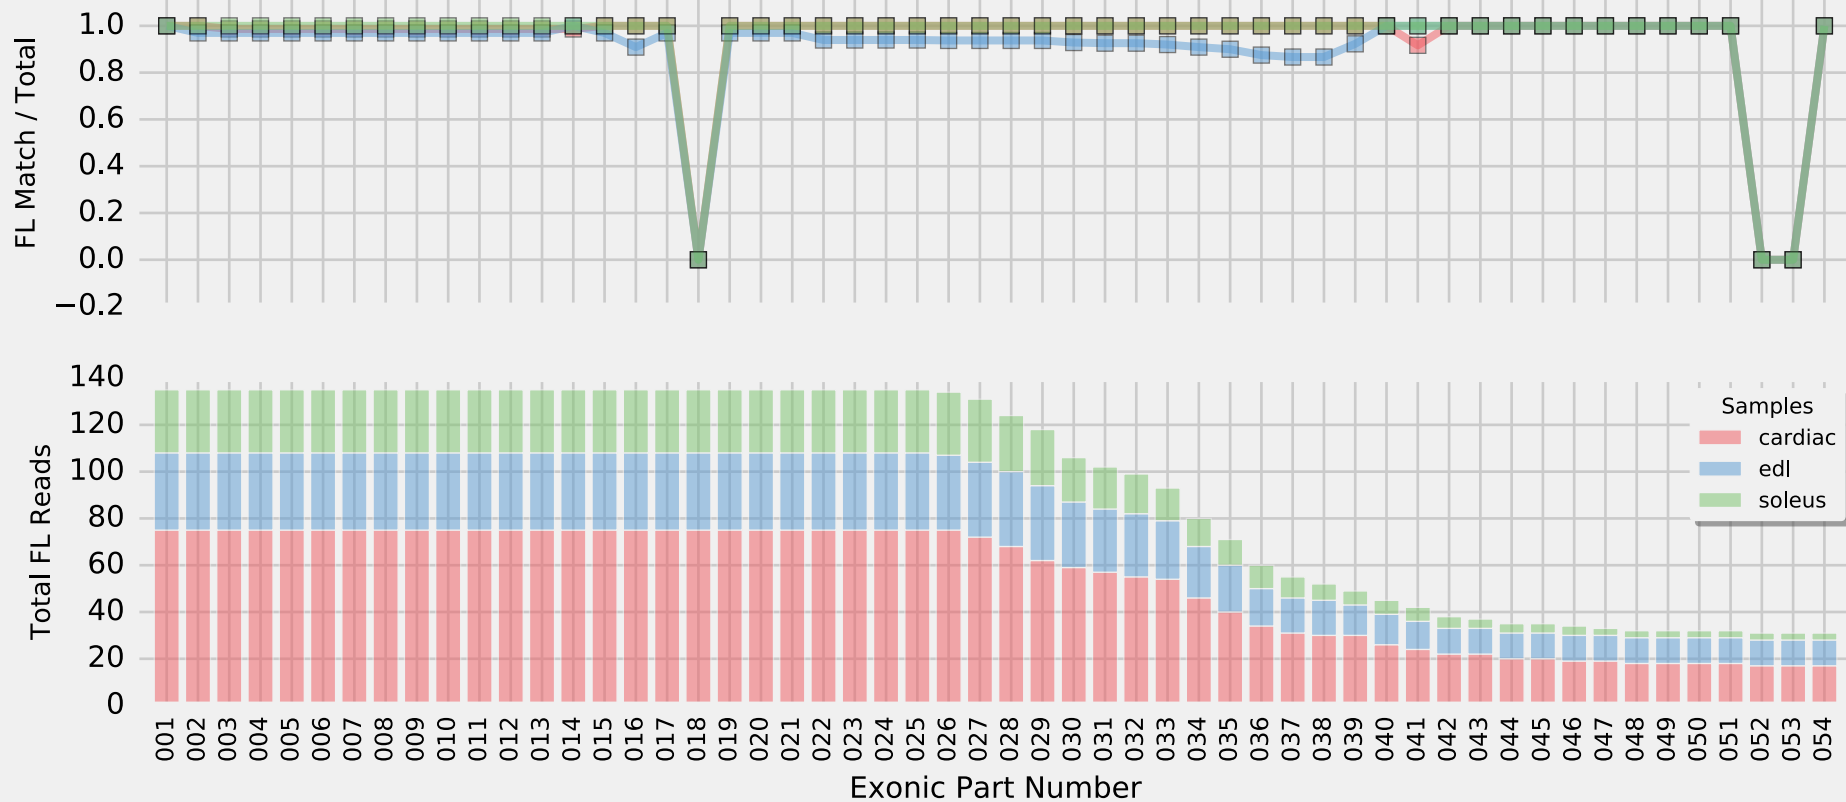

# Igfbp5

FL Match / Total

1.0  
0.8  
0.6  
0.4  
0.2  
0.0  
-0.2

Total FL Reads

400  
350  
300  
250  
200  
150  
100  
50  
0

Samples  
cardiac  
edl  
soleus

Exonic Part Number

001

002

003

004

005

006

007

008

009

010

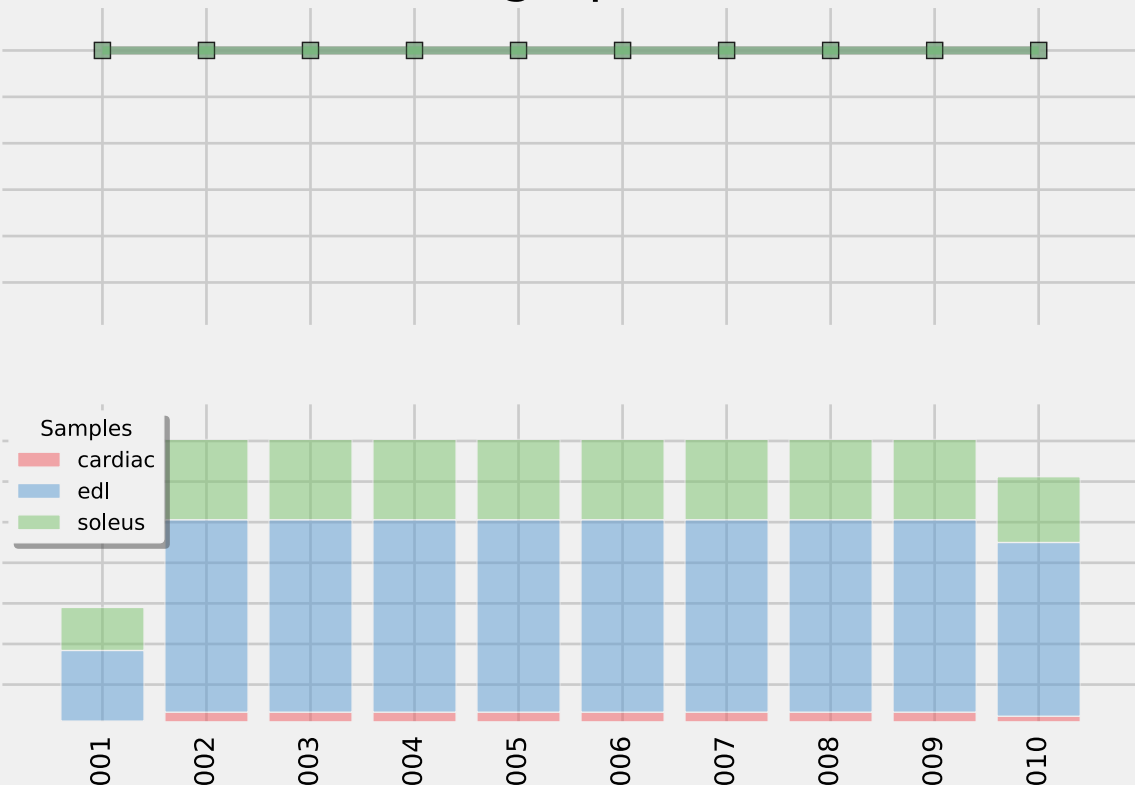

# Ikbkg

FL Match / Total

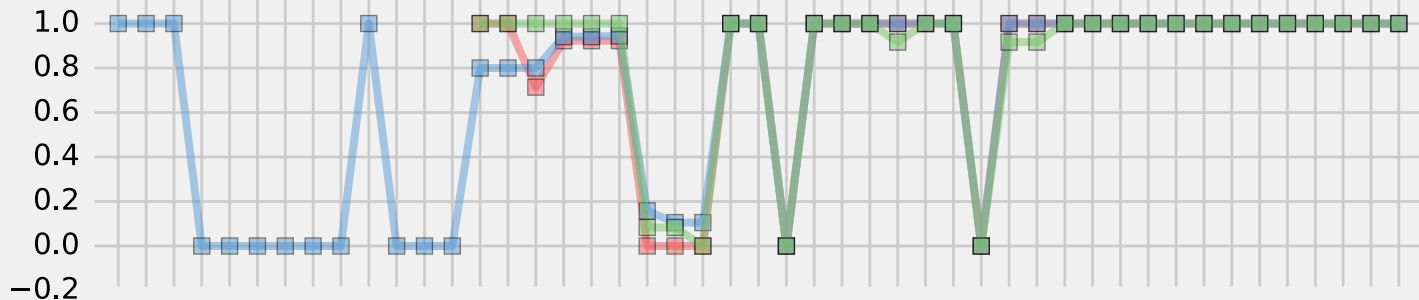

Total FL Reads

Samples  
cardiac  
edl  
soleus

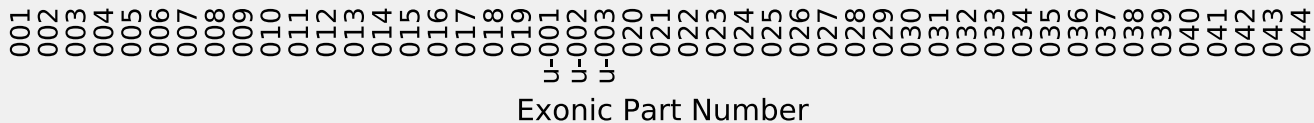

# II6st

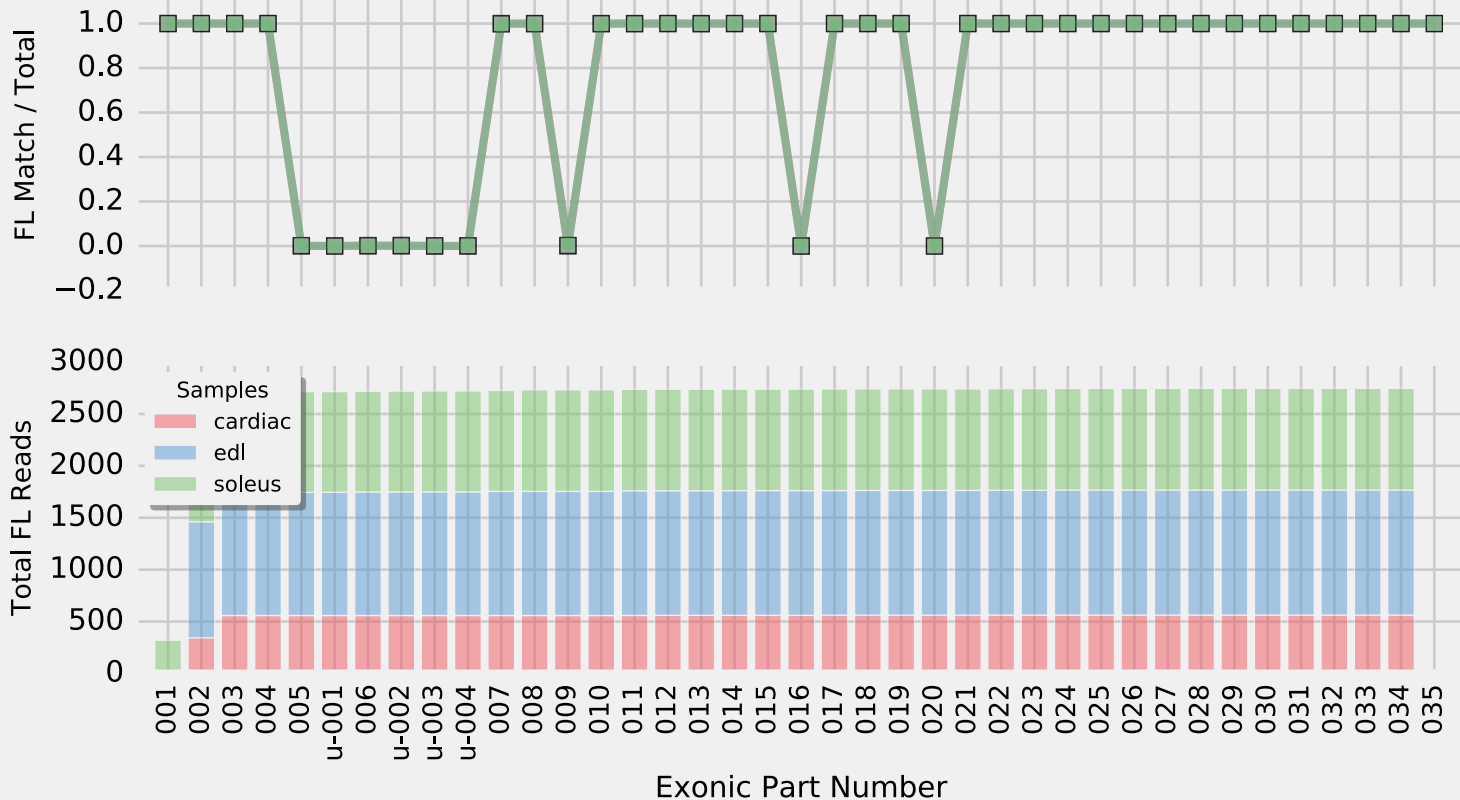



# Imp4

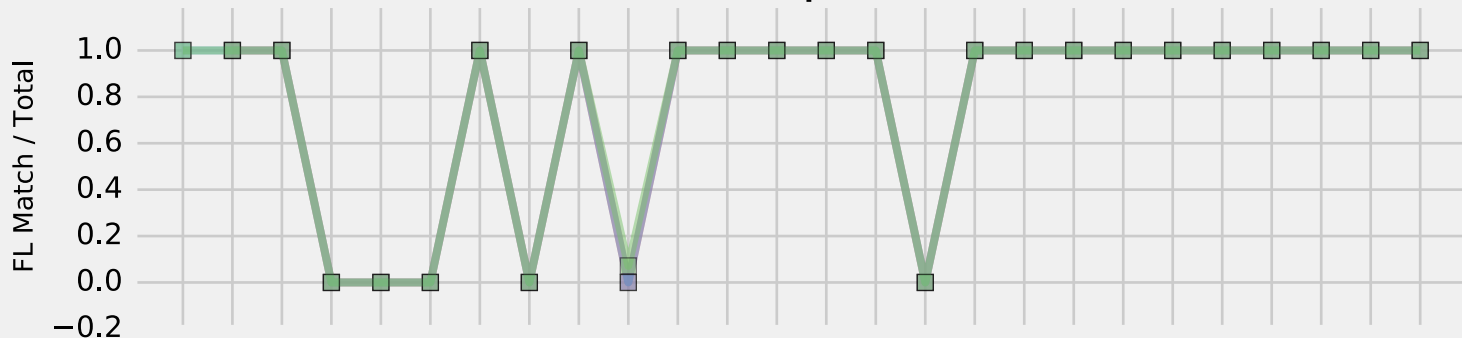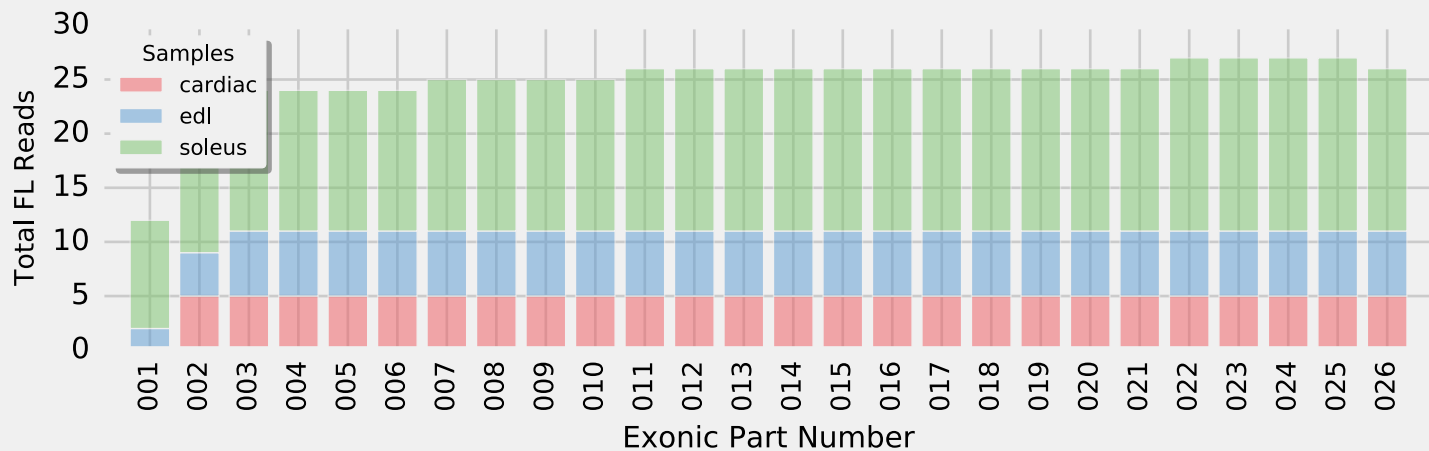

# Impad1

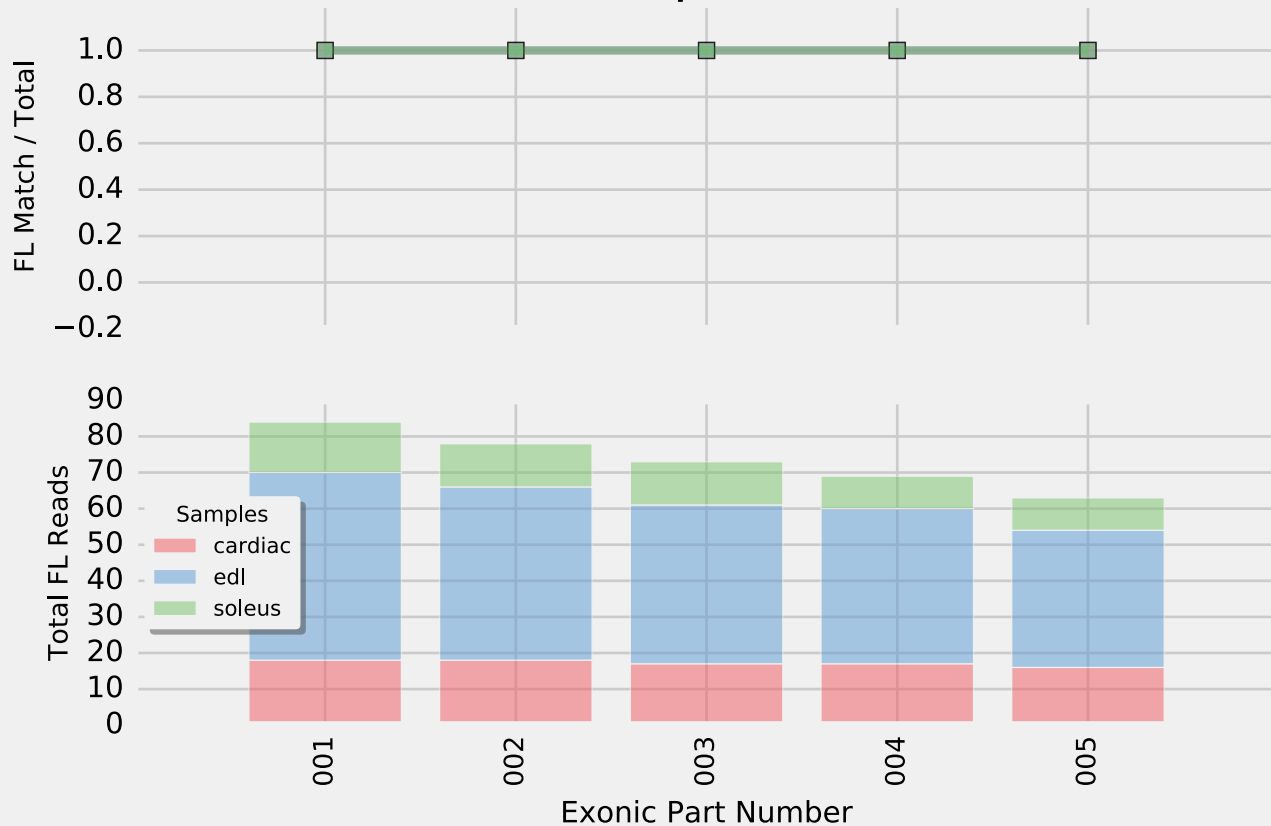

# Inpp4b

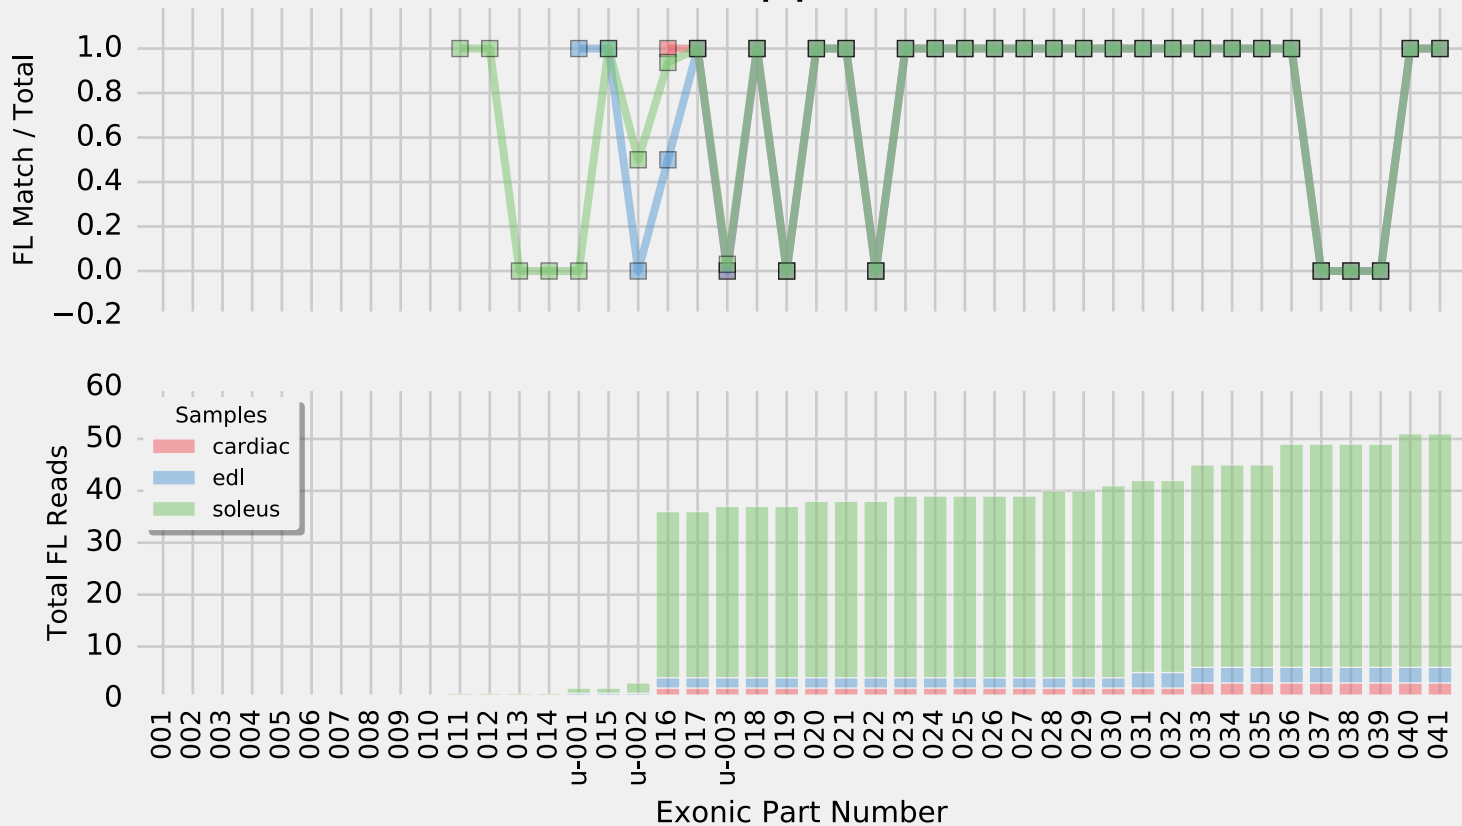

# Ipo8

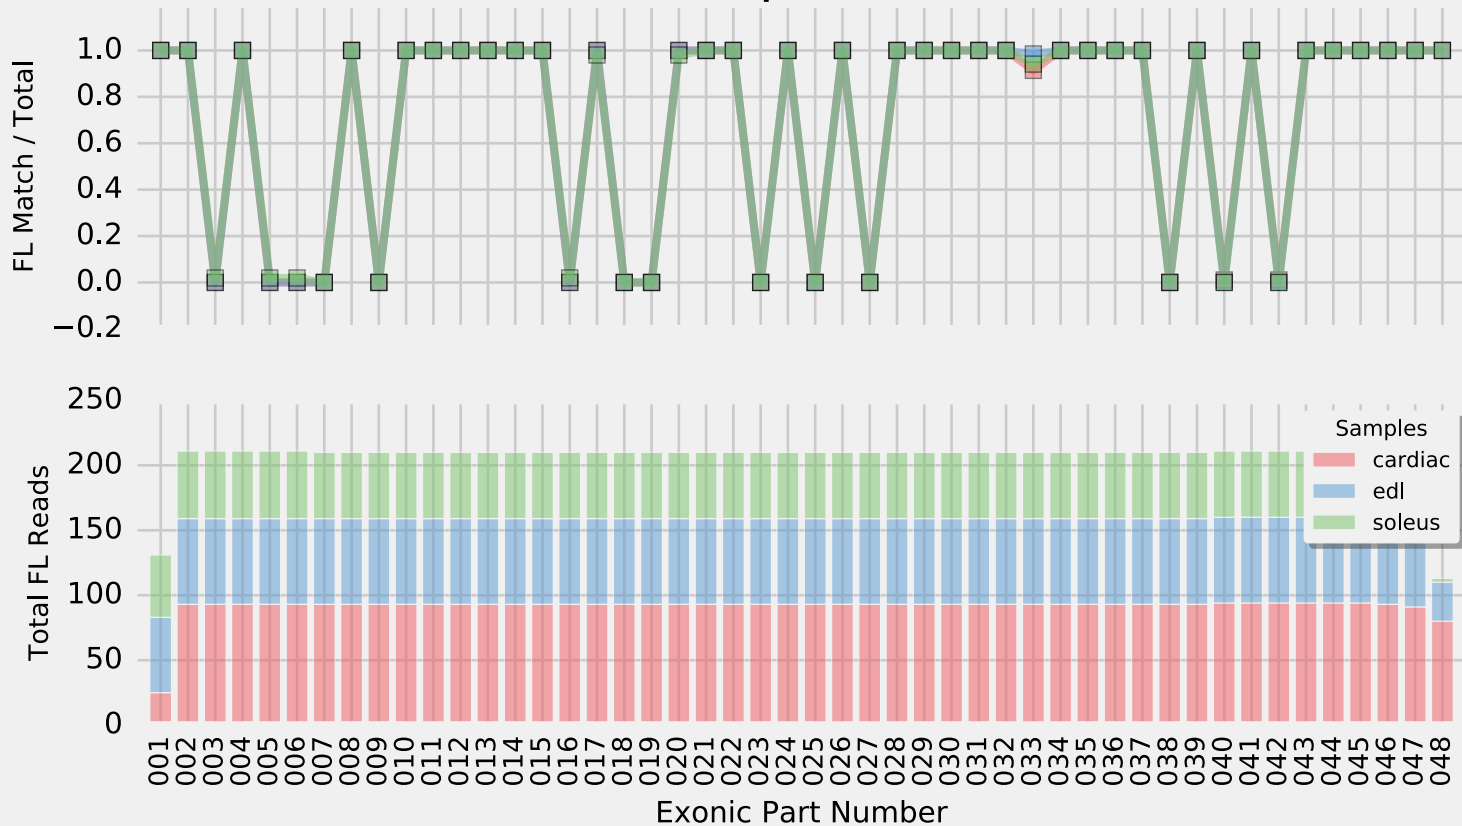

# Ipo9

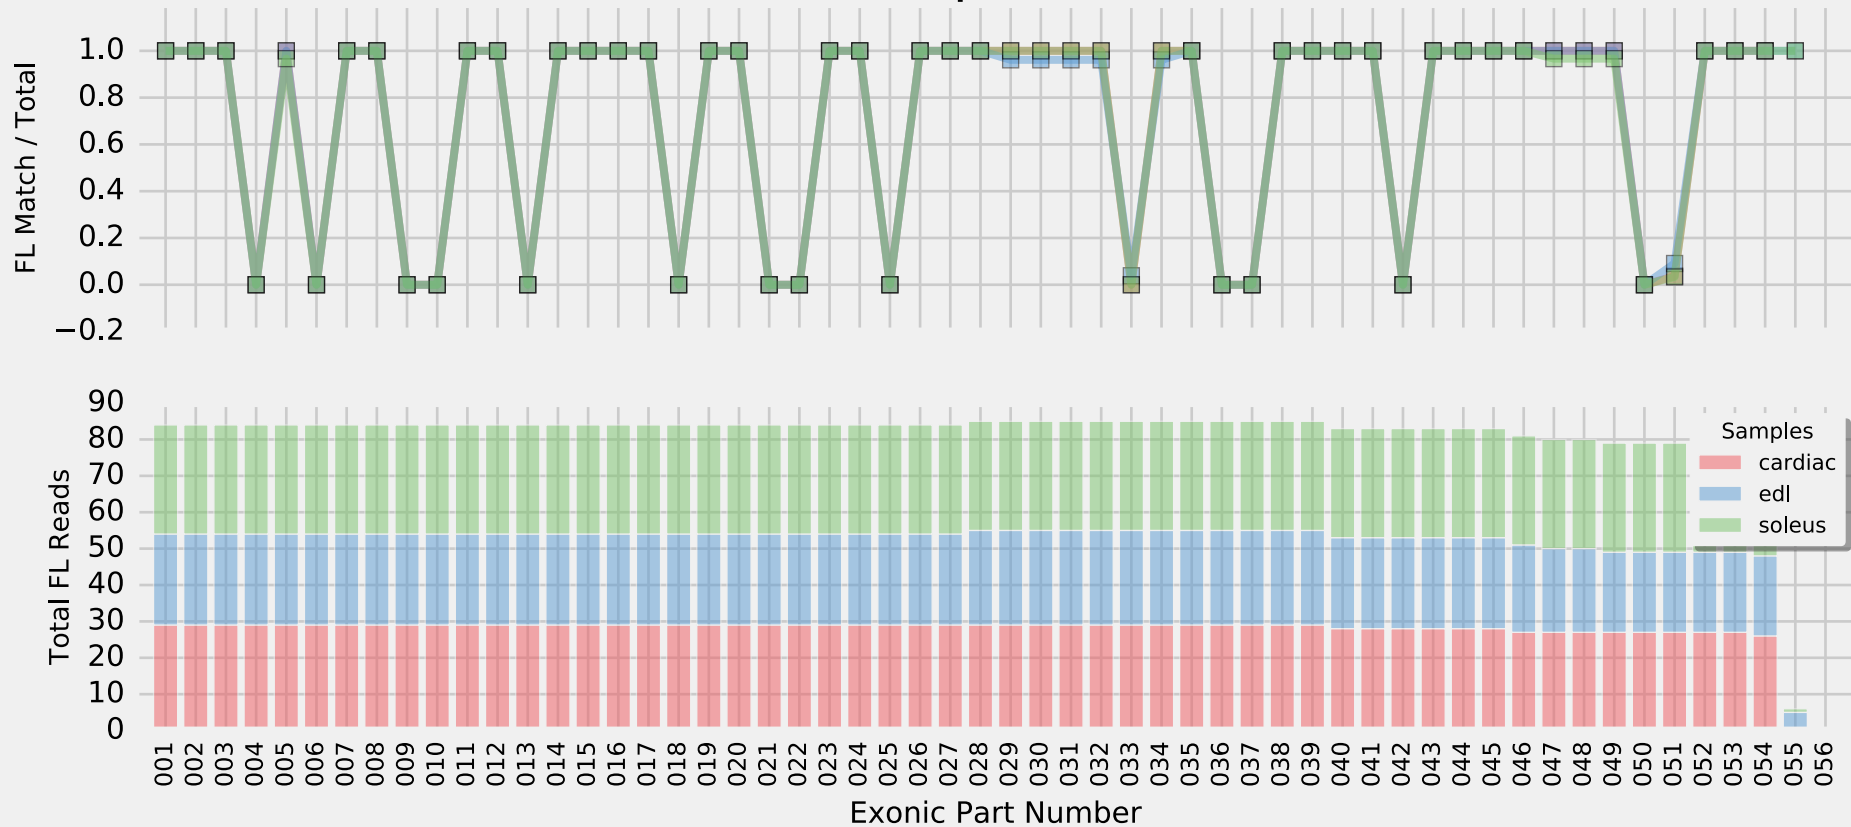

# Iqgap1

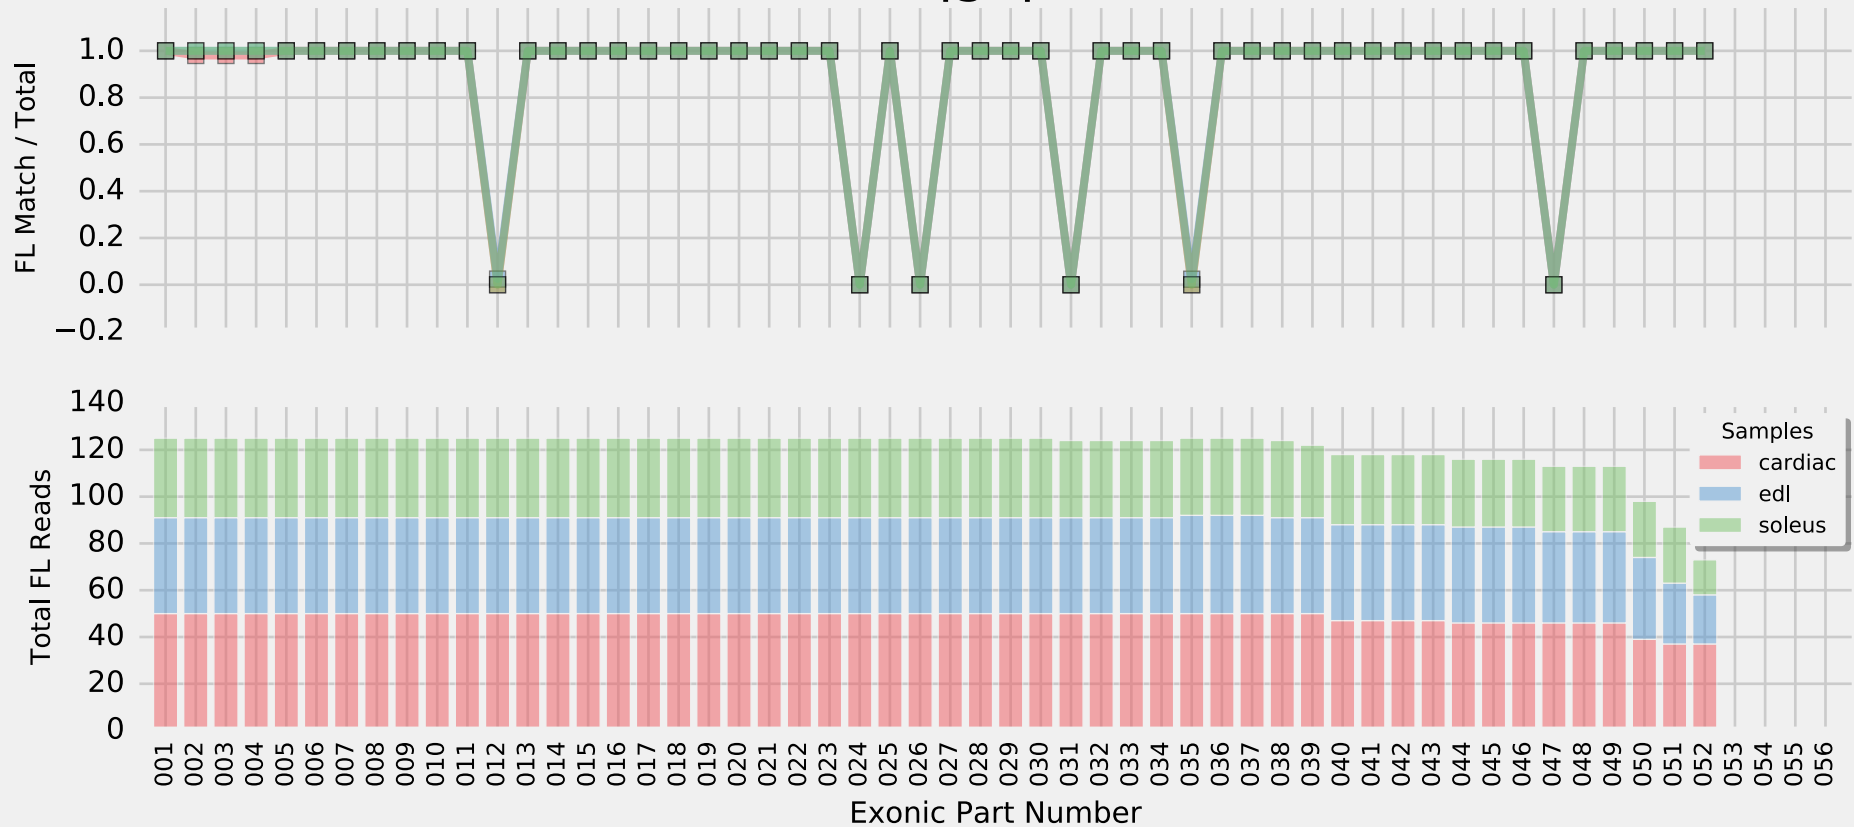

# Ireb2

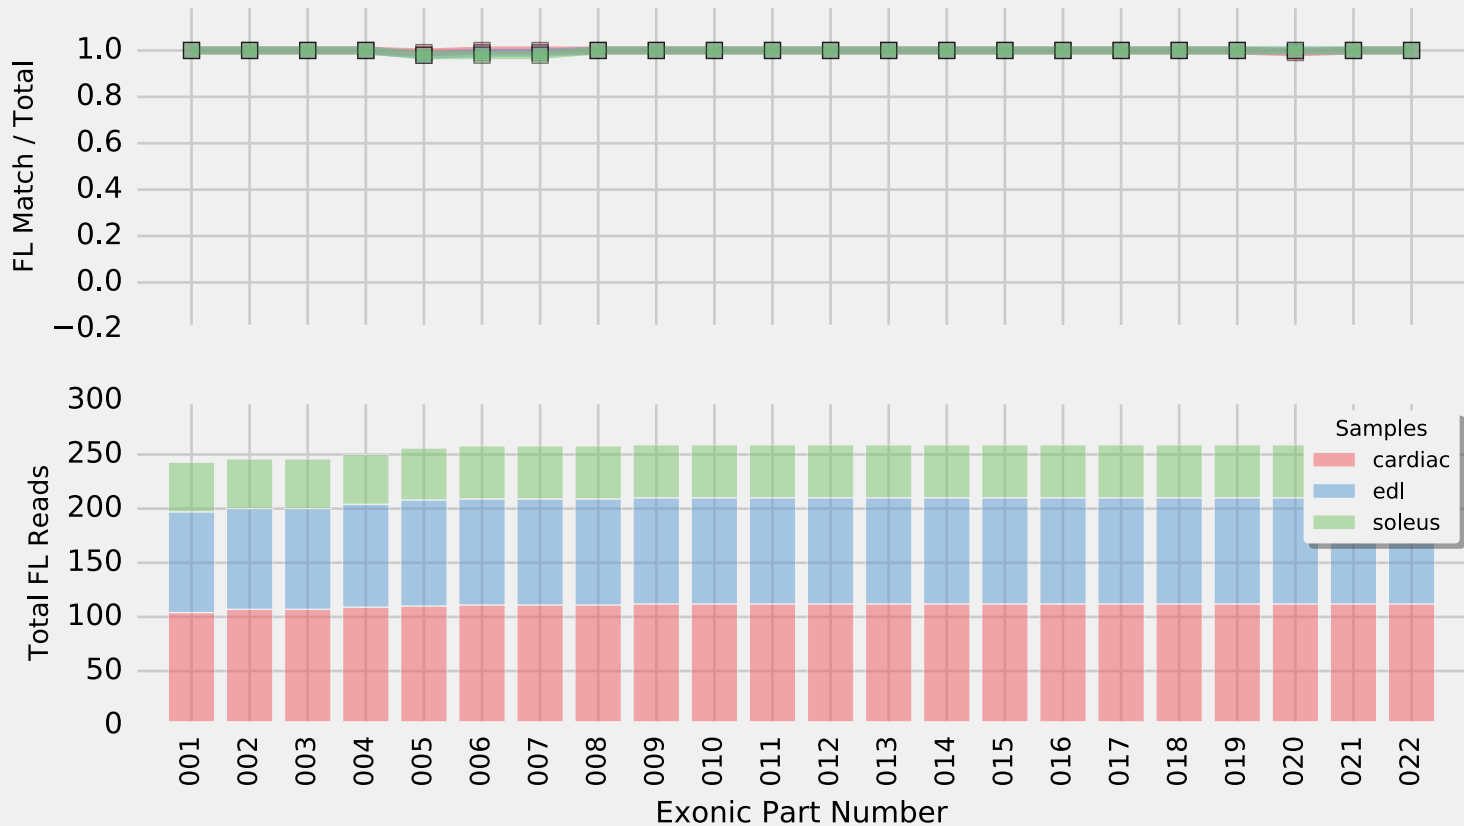

# Irs1

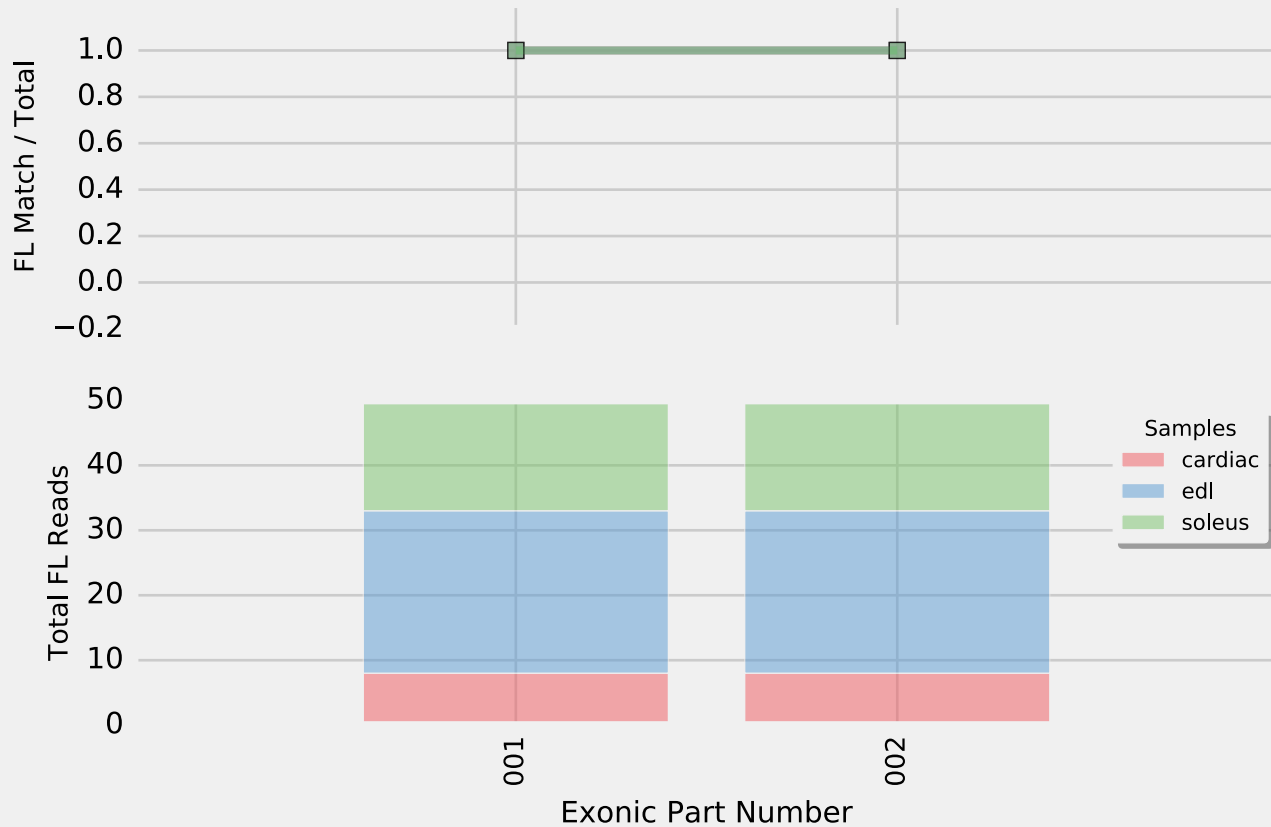



# Itch

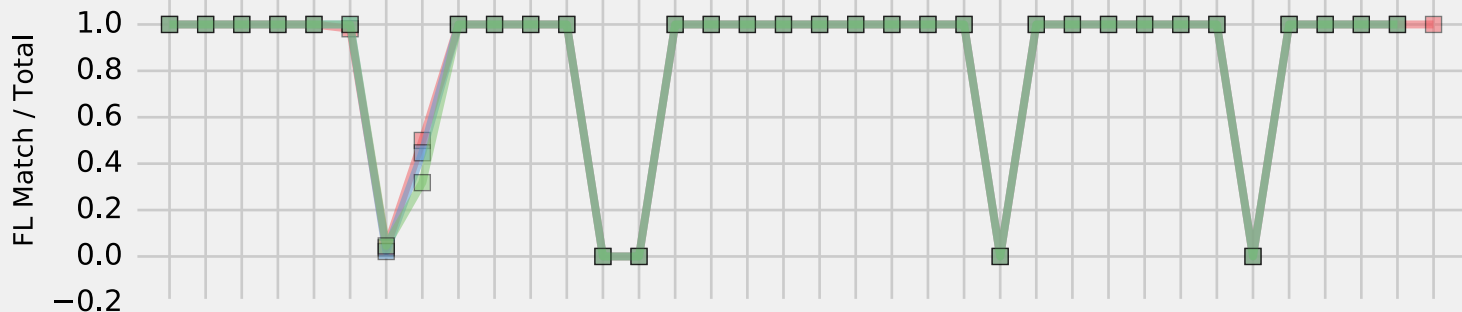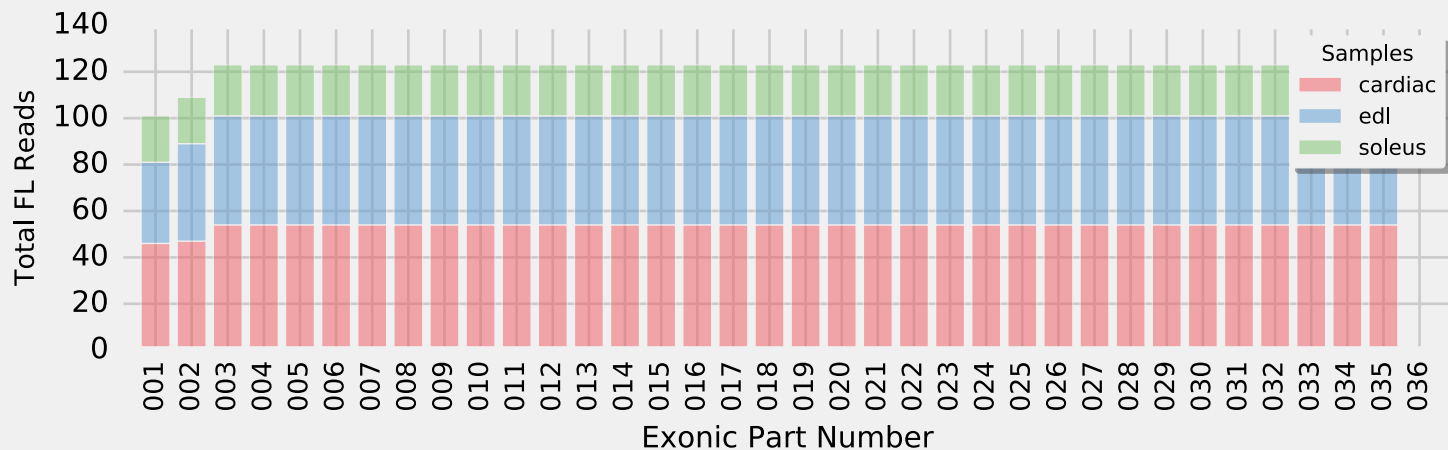

# Itga6

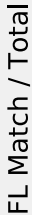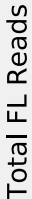

## Samples

cardiac

edl

# Itgav

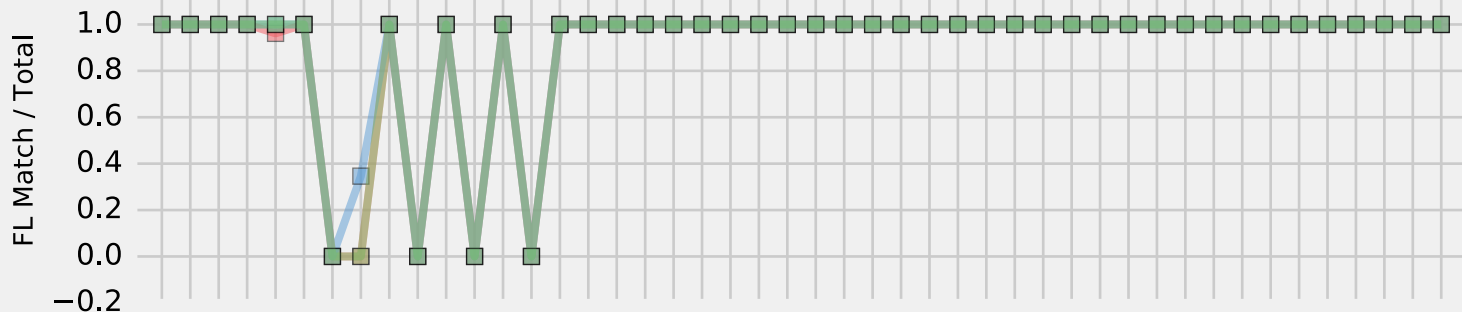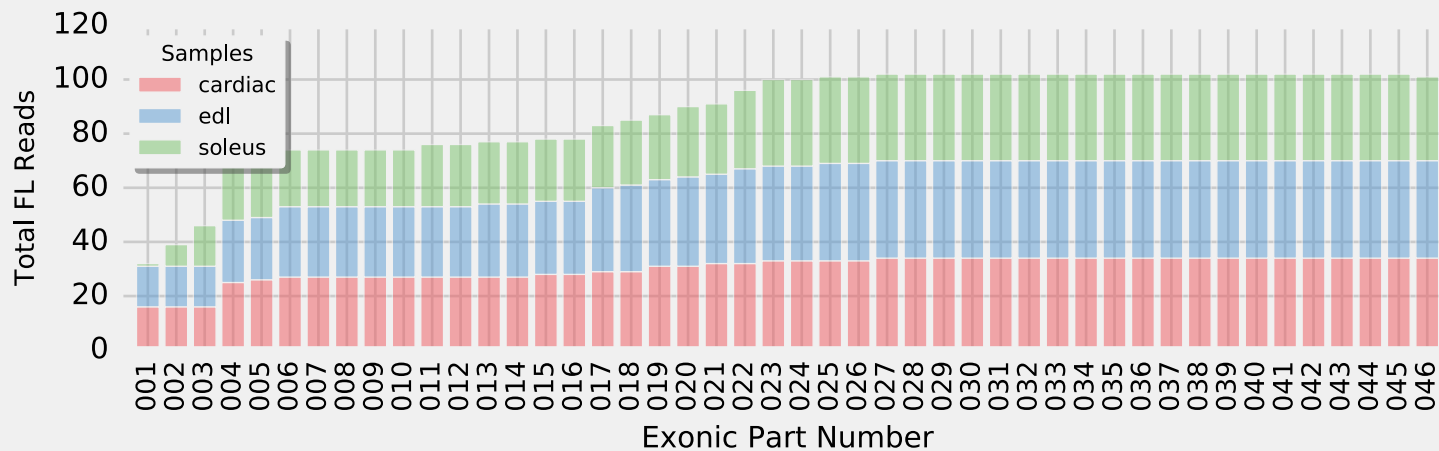

# ltpr1

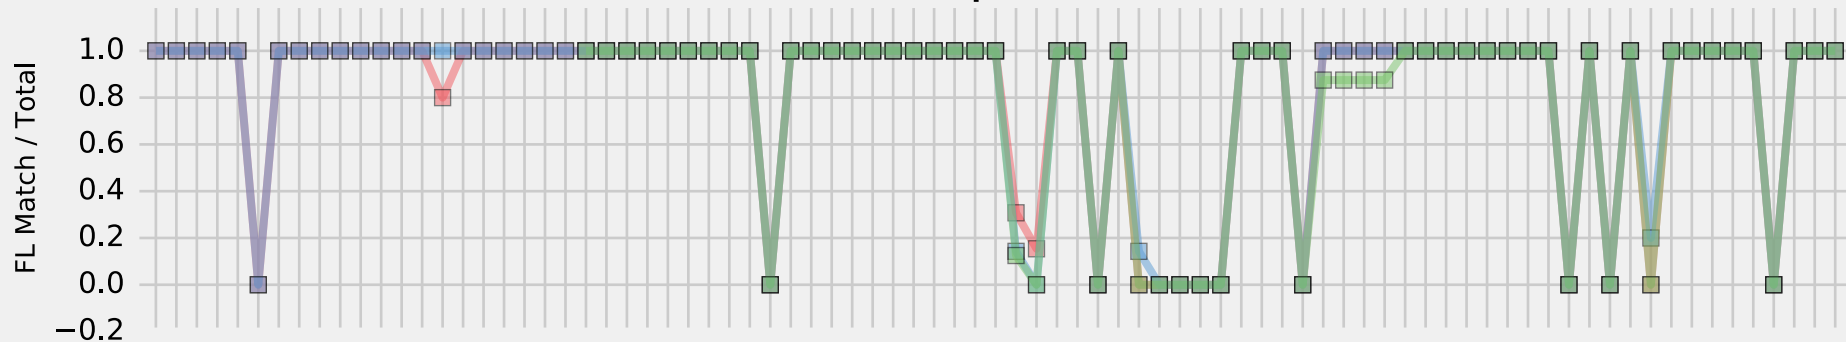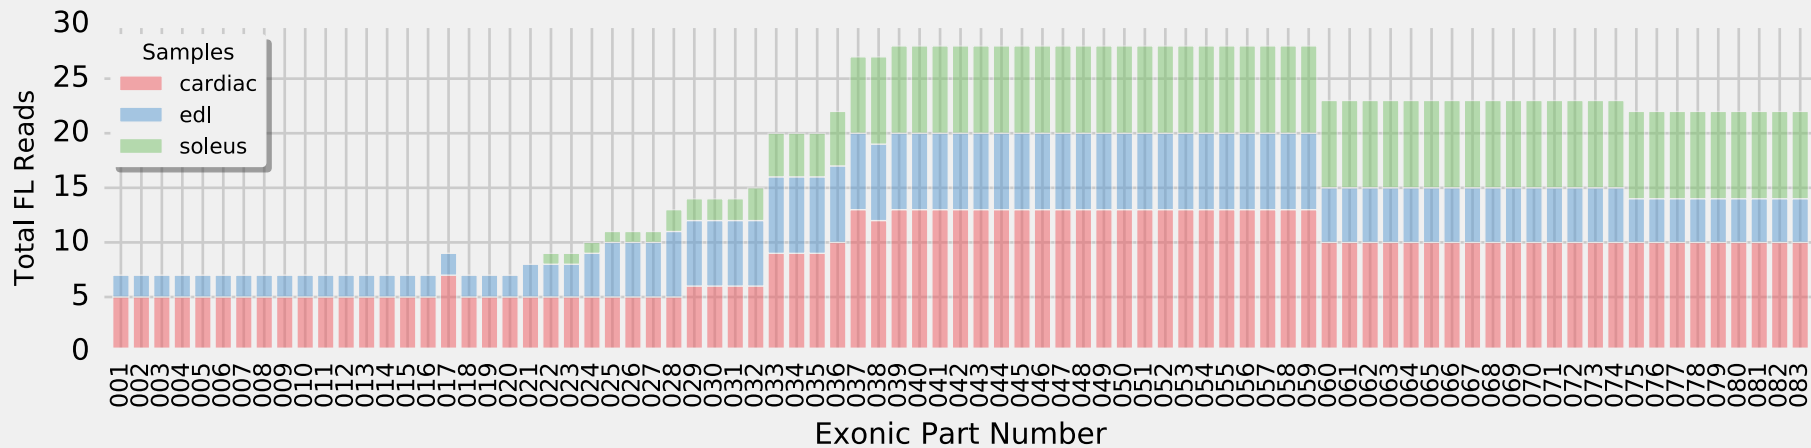

# ltsn1

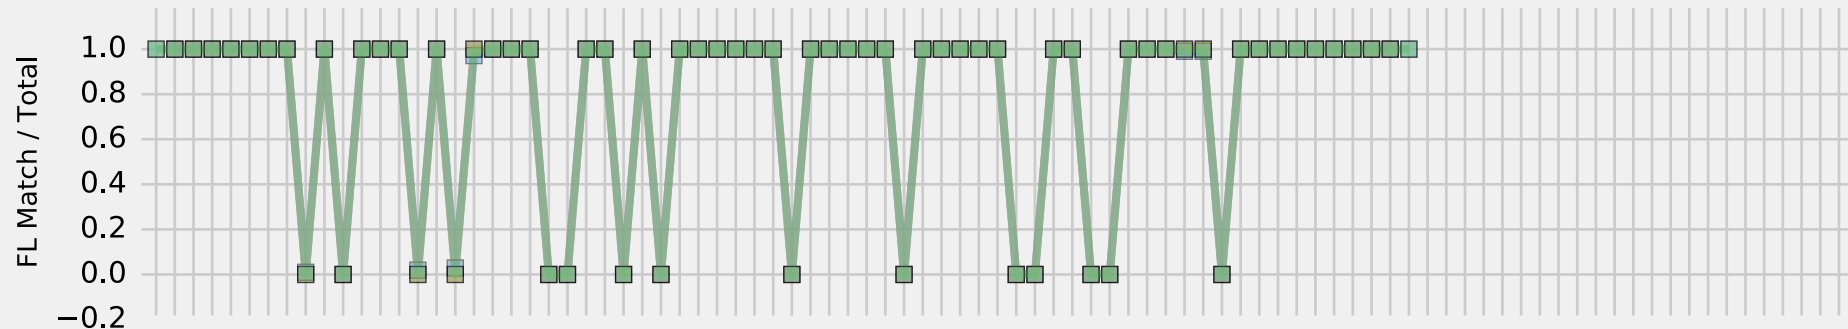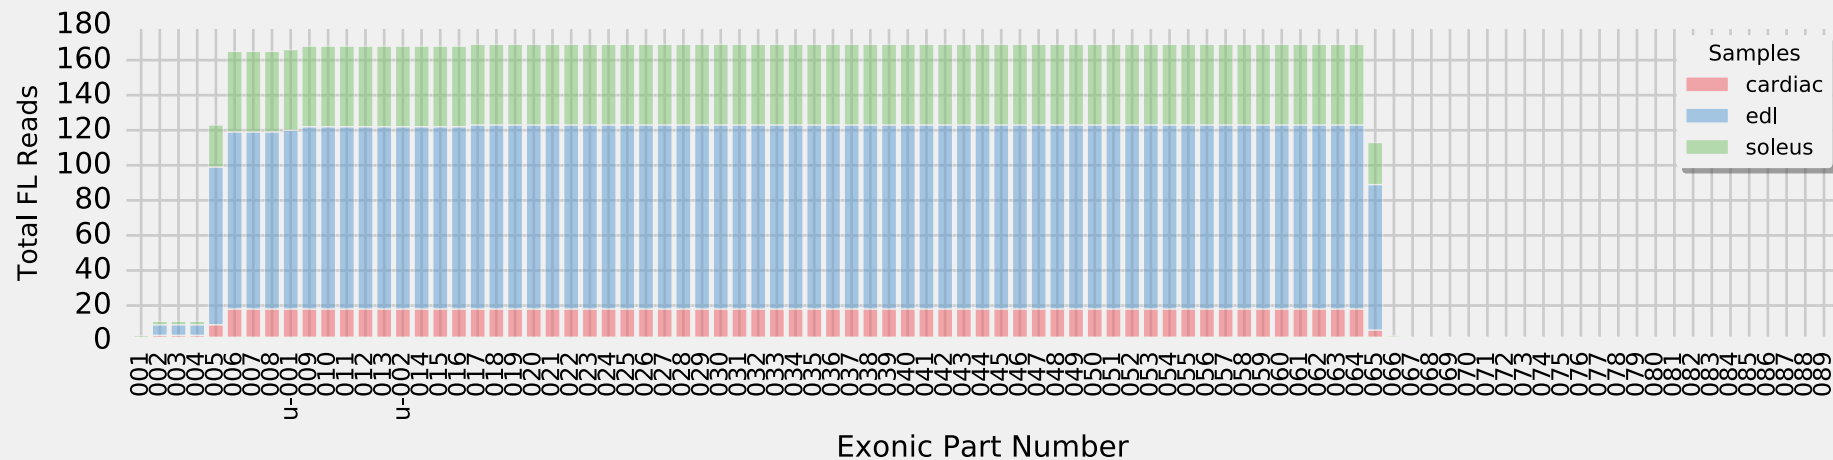

# Itsn2

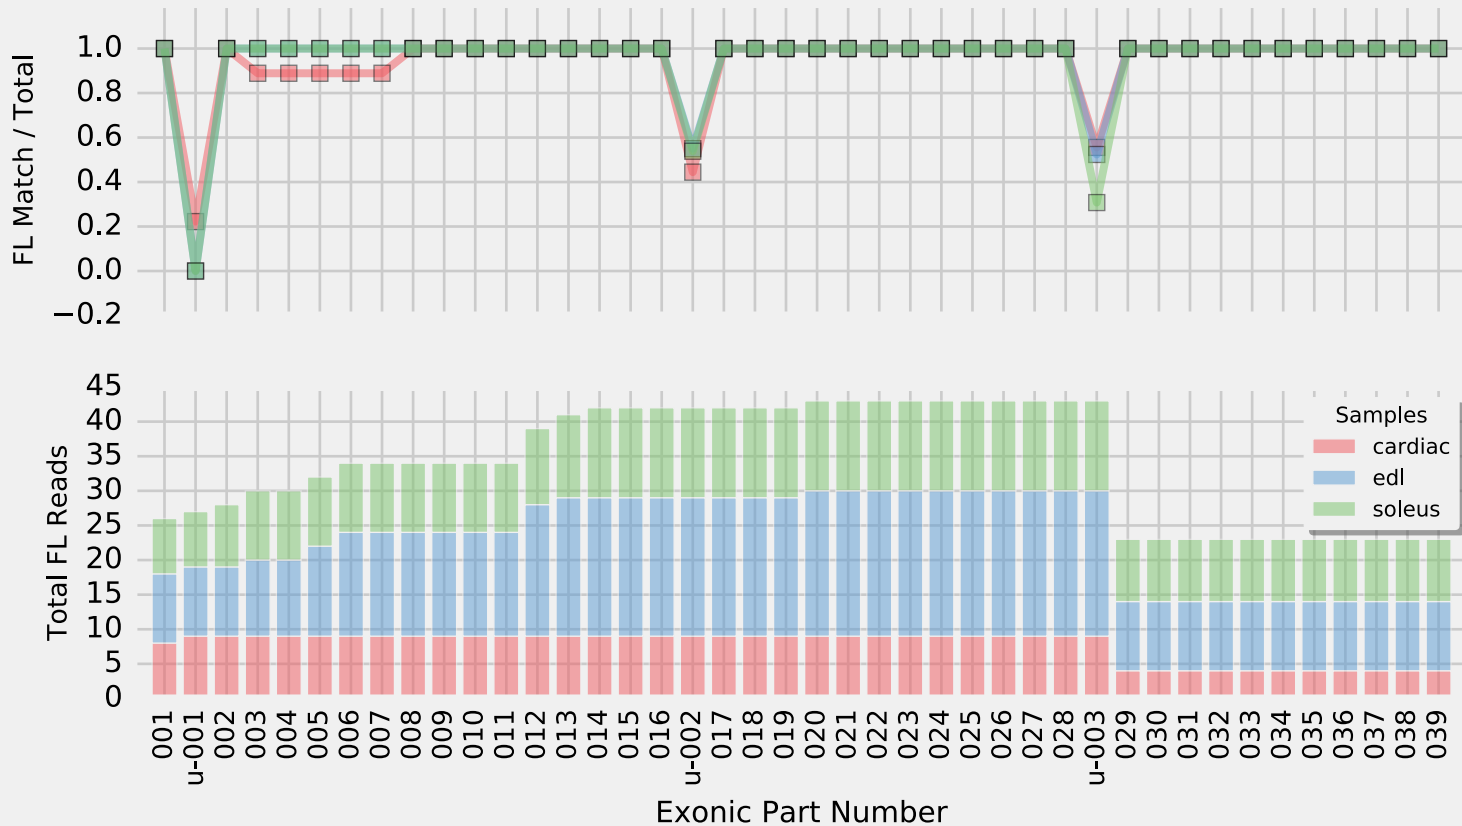

# Ivns1abp

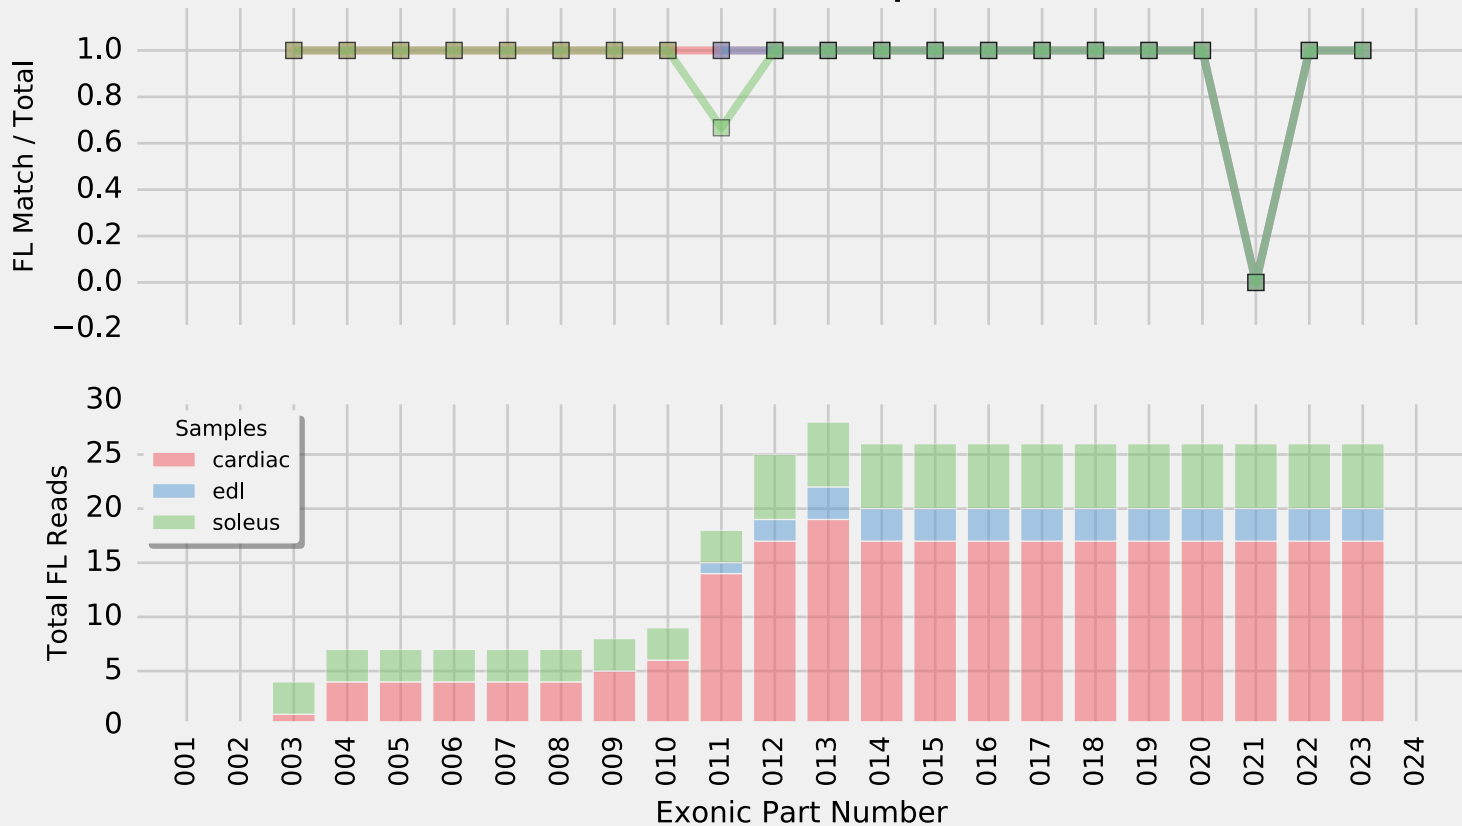

# Jarid2

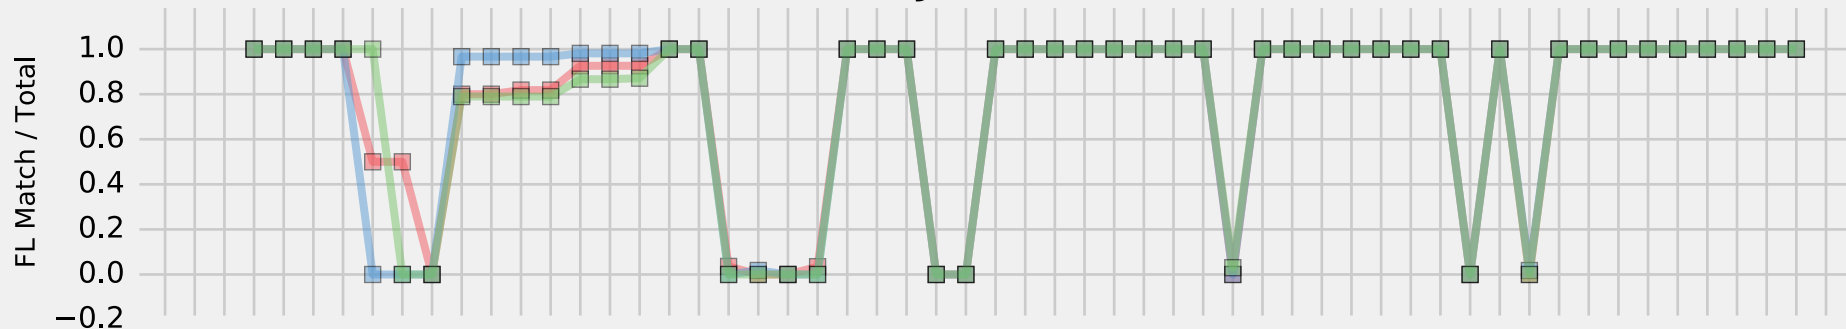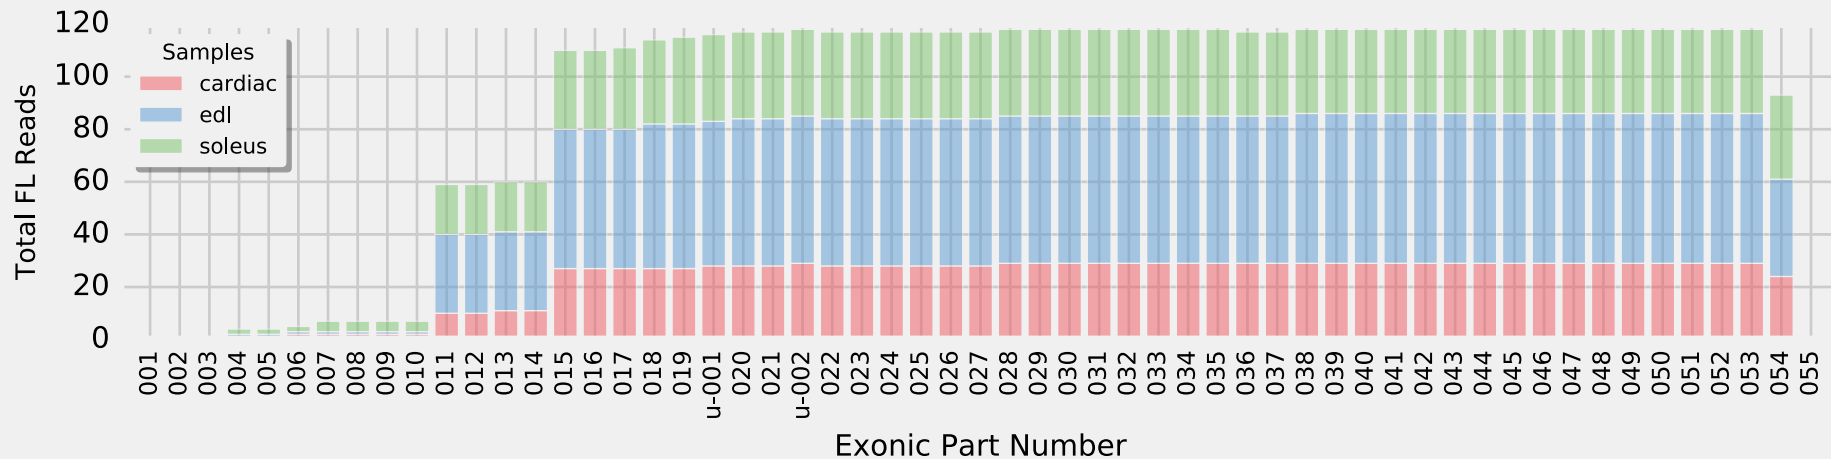



# Jmjd1c

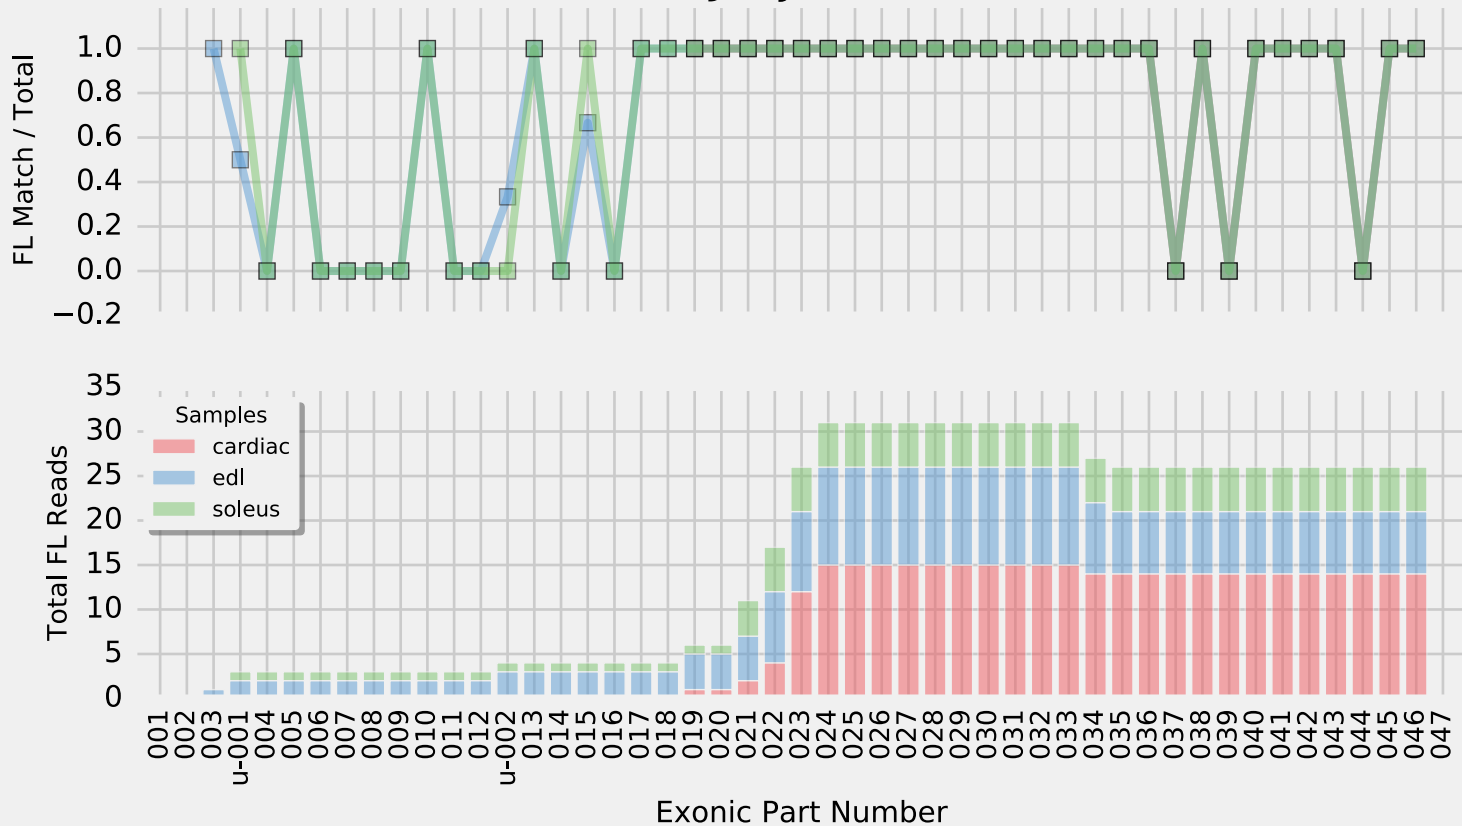

# Kank1

FL Match / Total

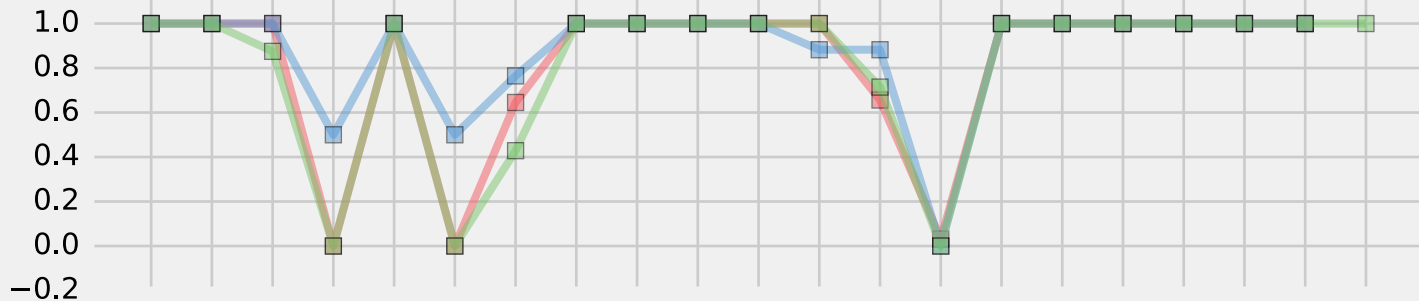

Total FL Reads

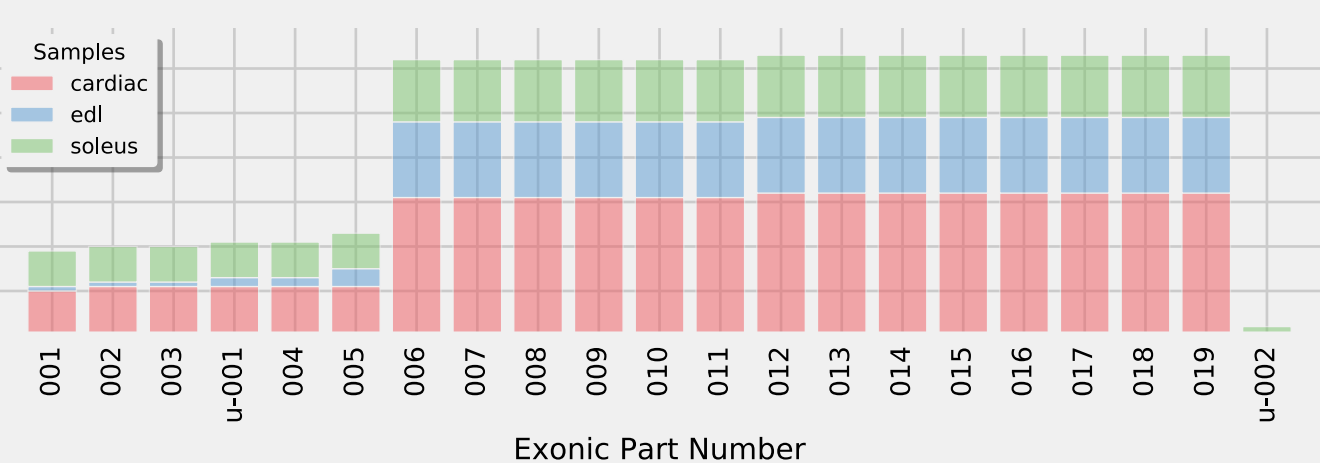

# Kbtbd2

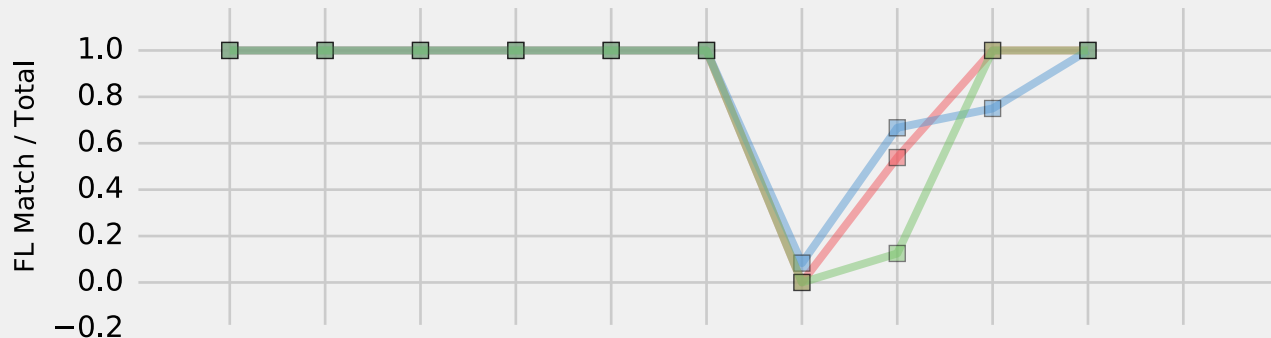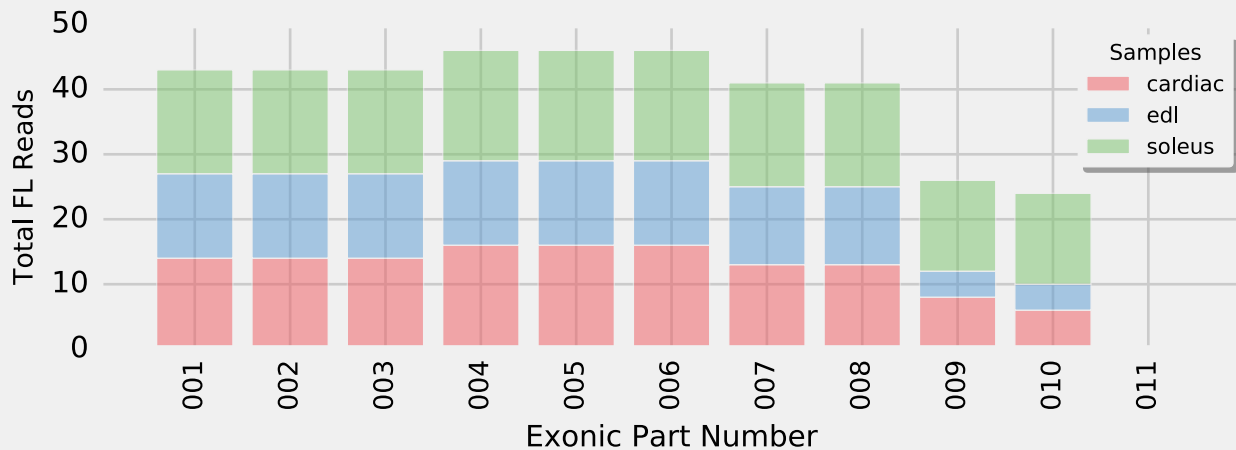

# Kcnj2

FL Match / Total

1.0  
0.8  
0.6  
0.4  
0.2  
0.0  
-0.2

Total FL Reads

450  
400  
350  
300  
250  
200  
150  
100  
50  
0

Samples

cardiac  
edl  
soleus

001

002

Exonic Part Number

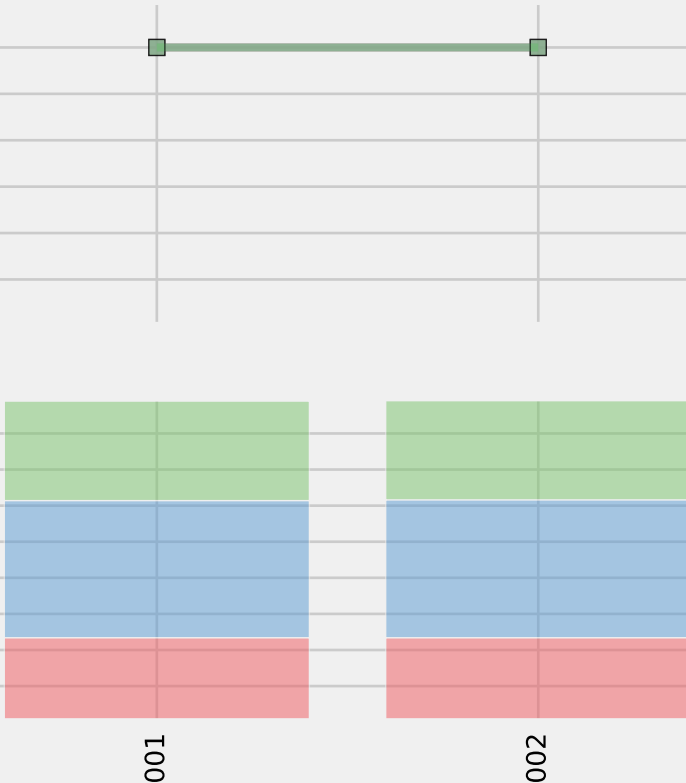

# Kdm5a

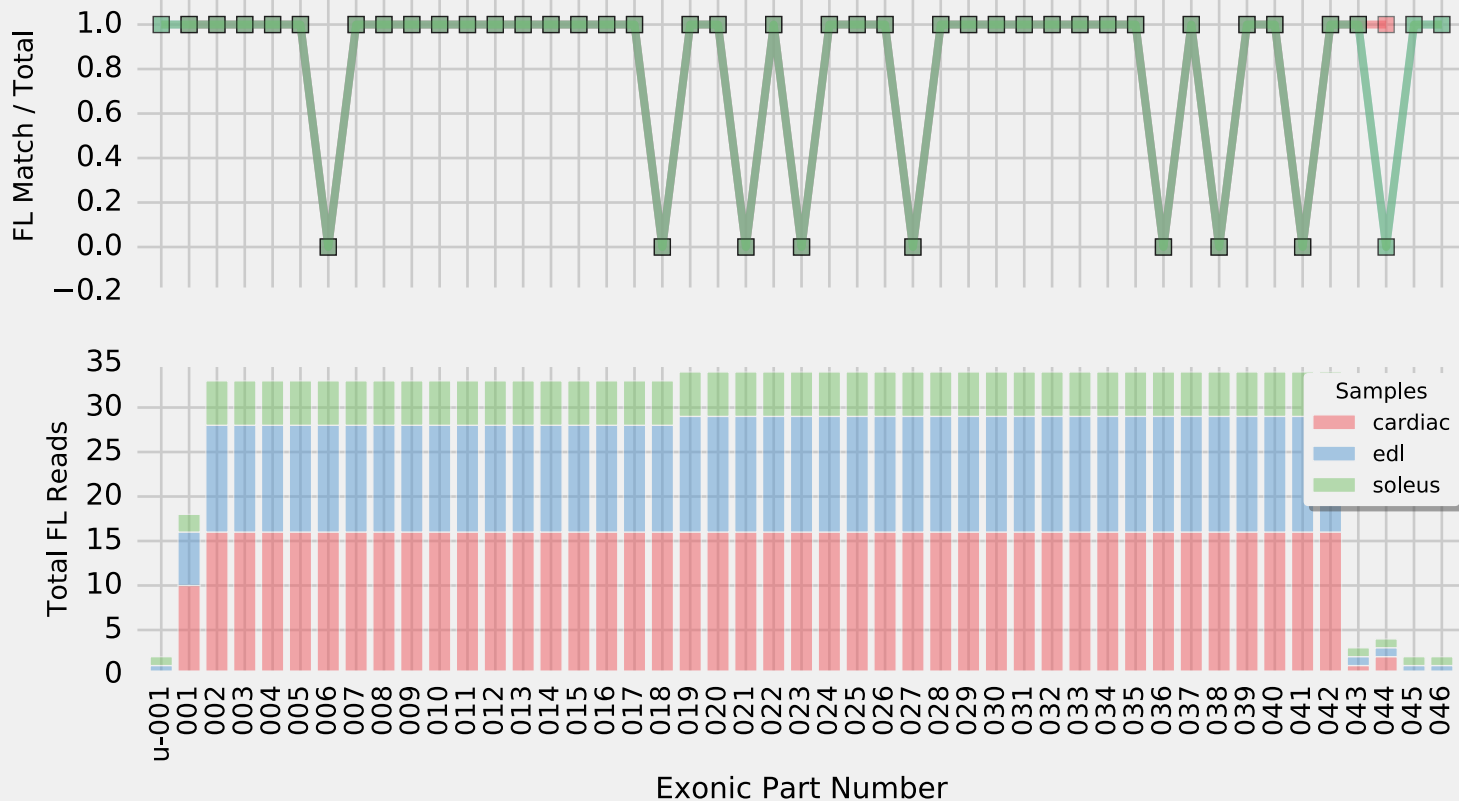

# Kdm5c

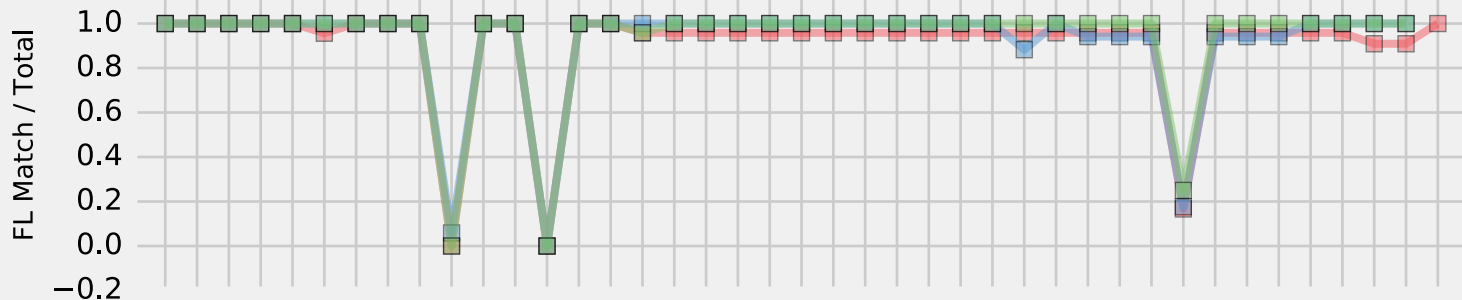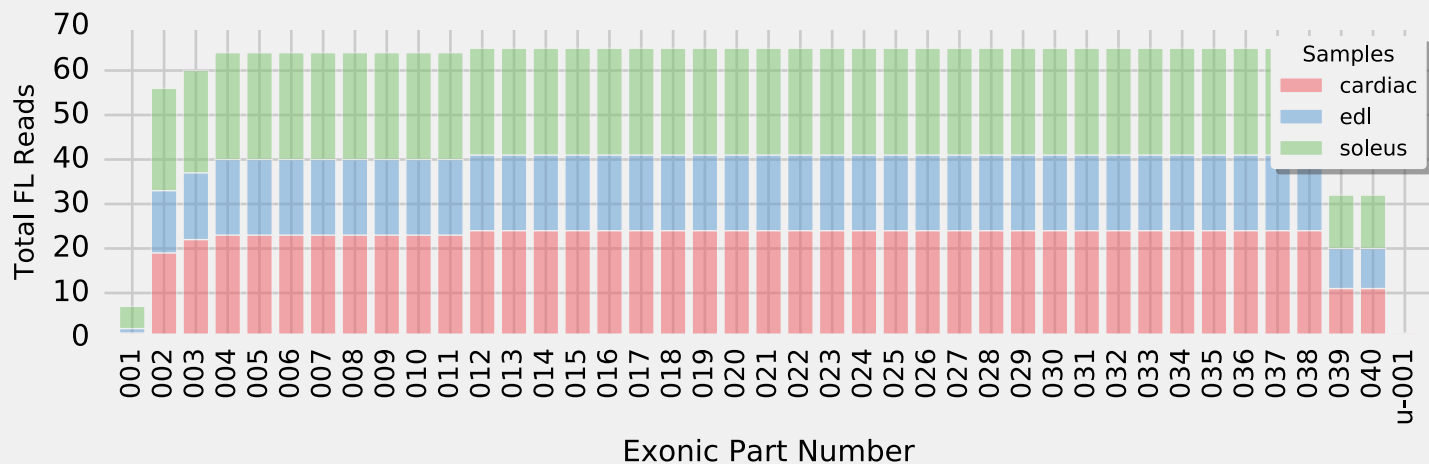

# Kdm5d

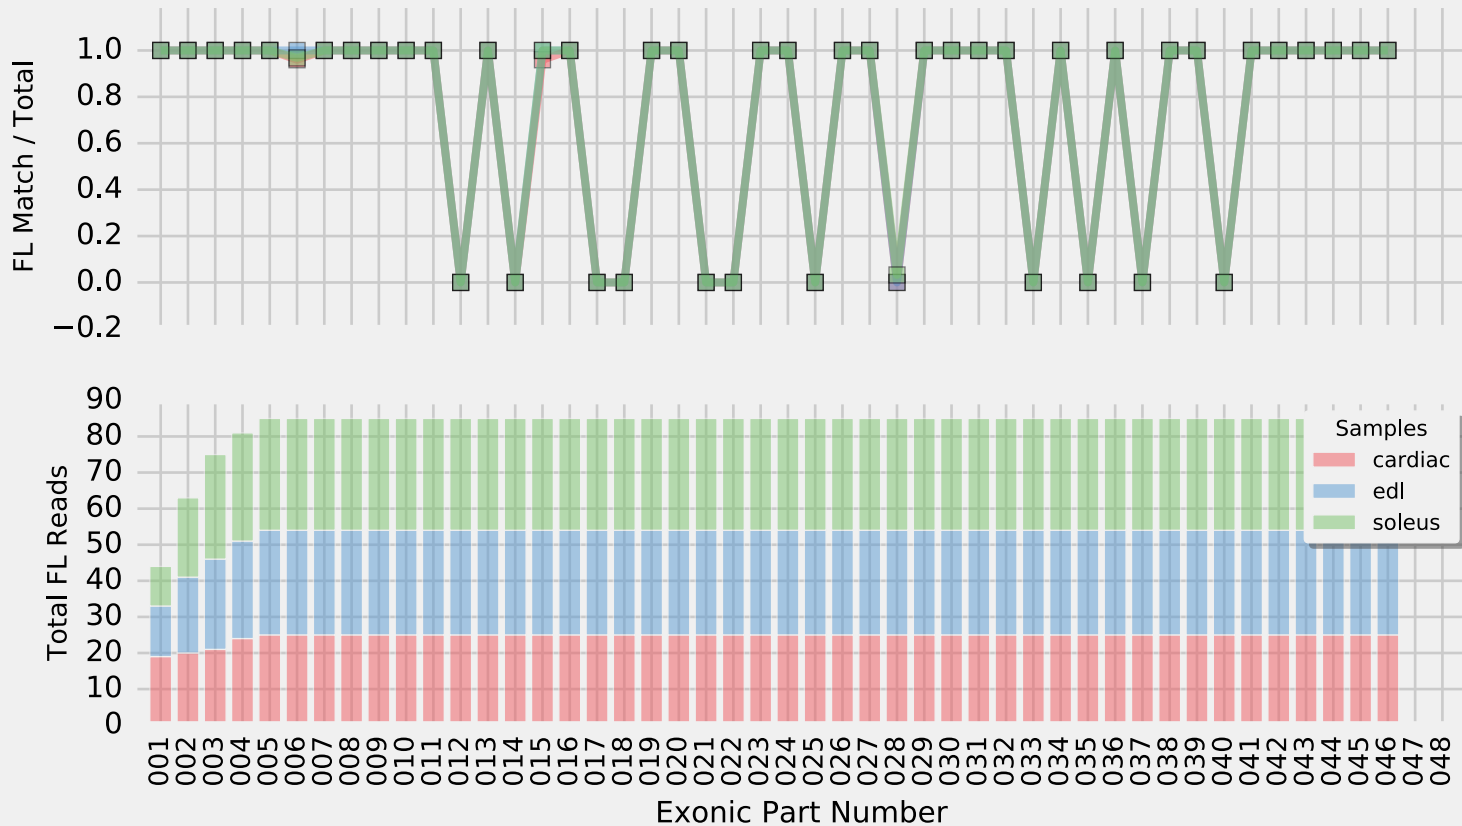

# Kdm6a

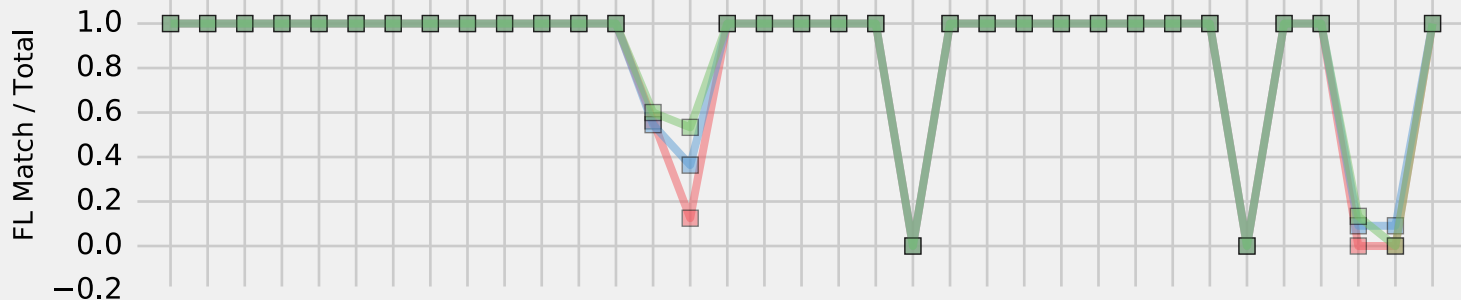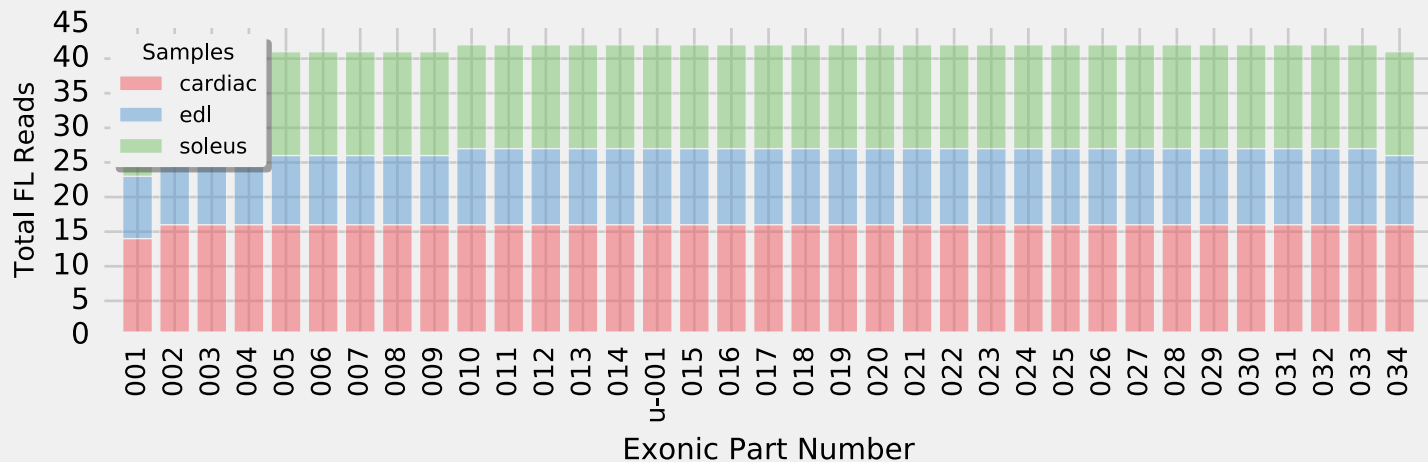



# Kdm7a

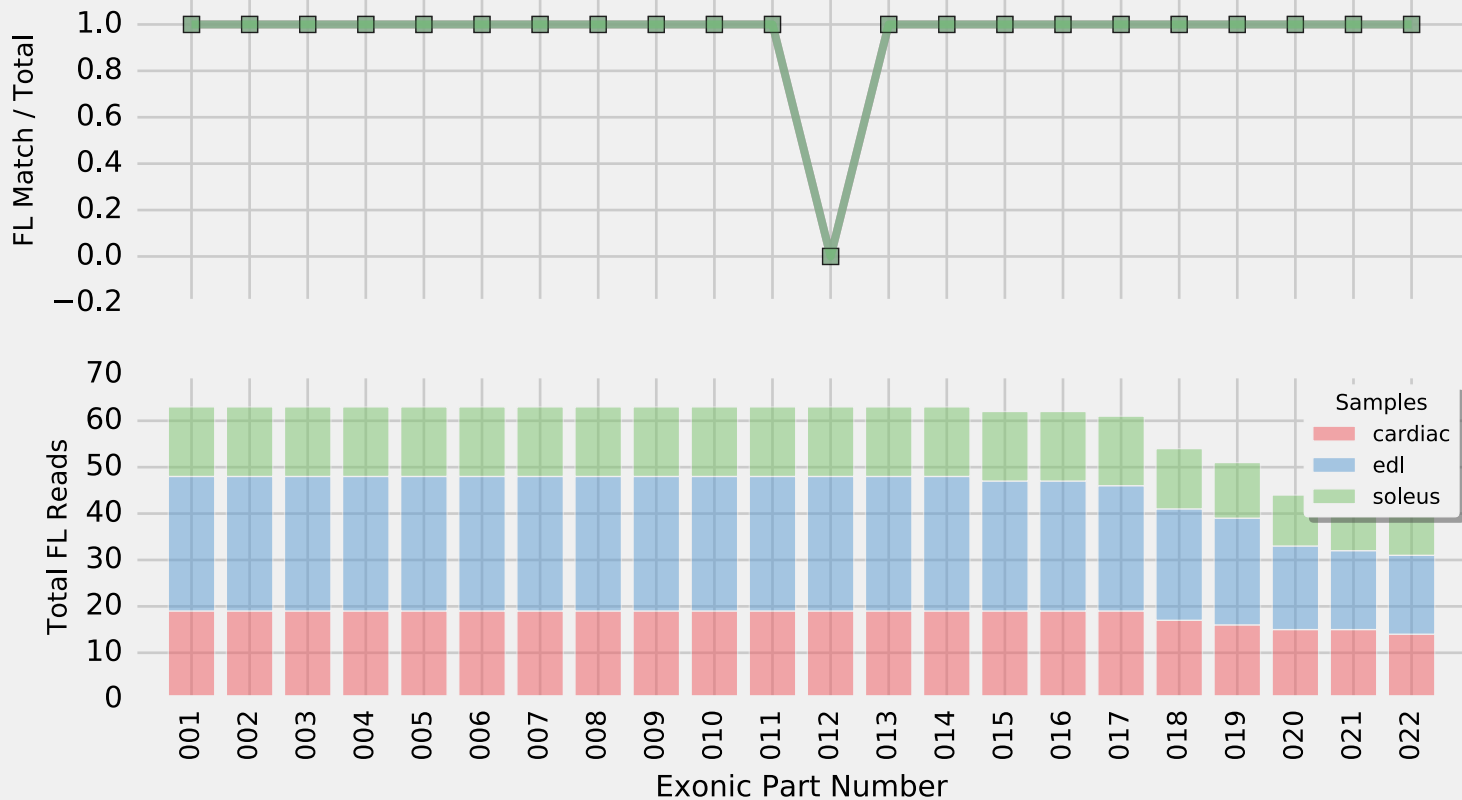

# Kdr

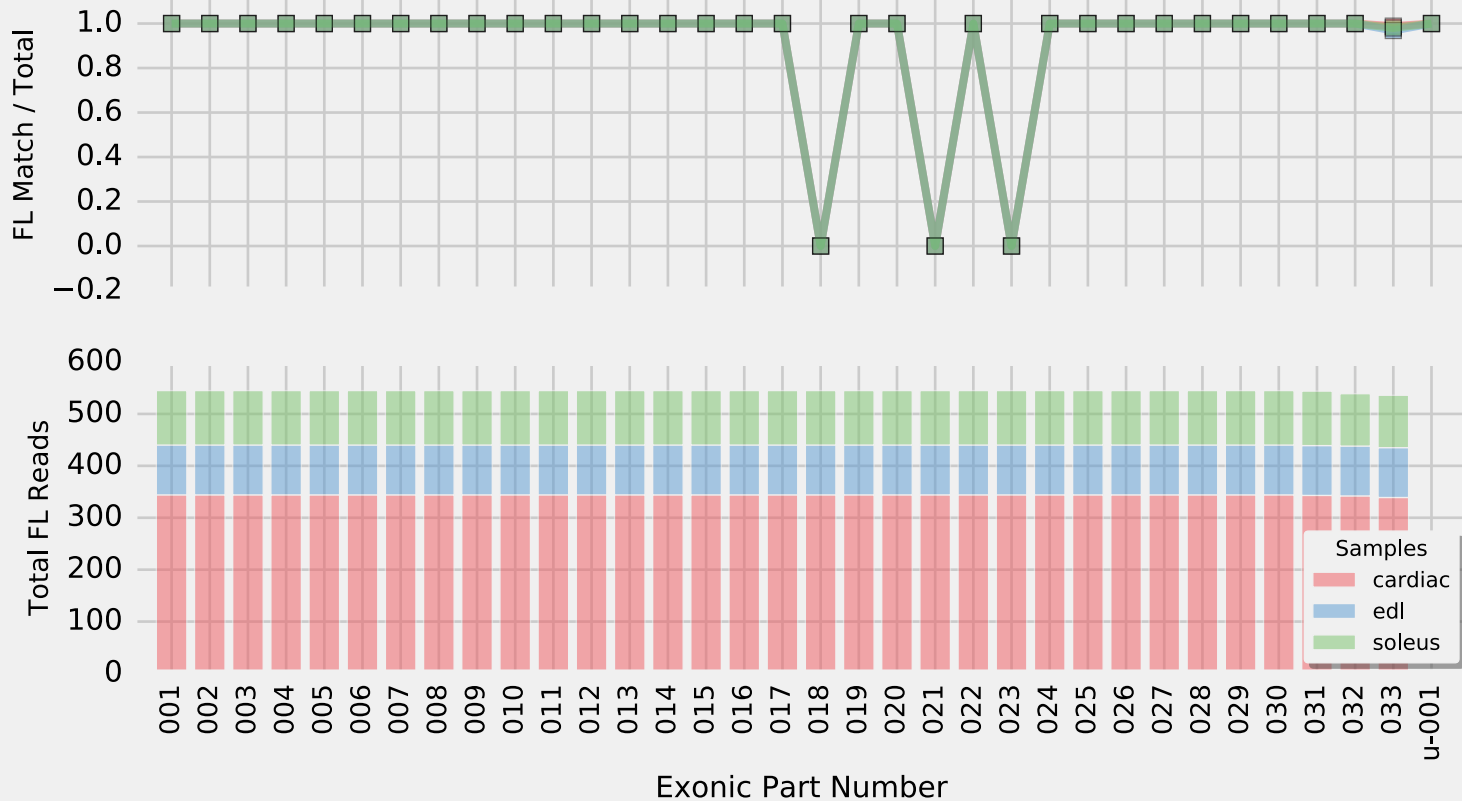

# Khнын

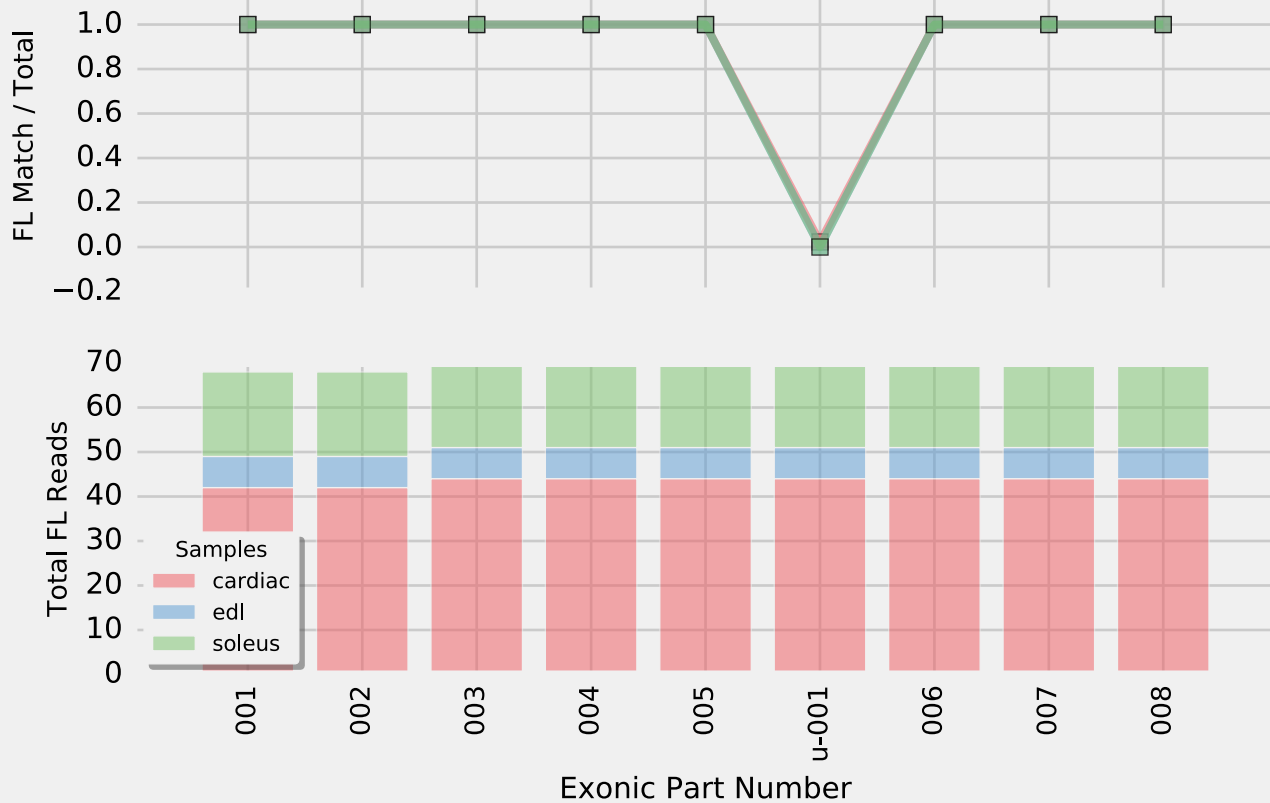

# Kidins220

FL Match / Total

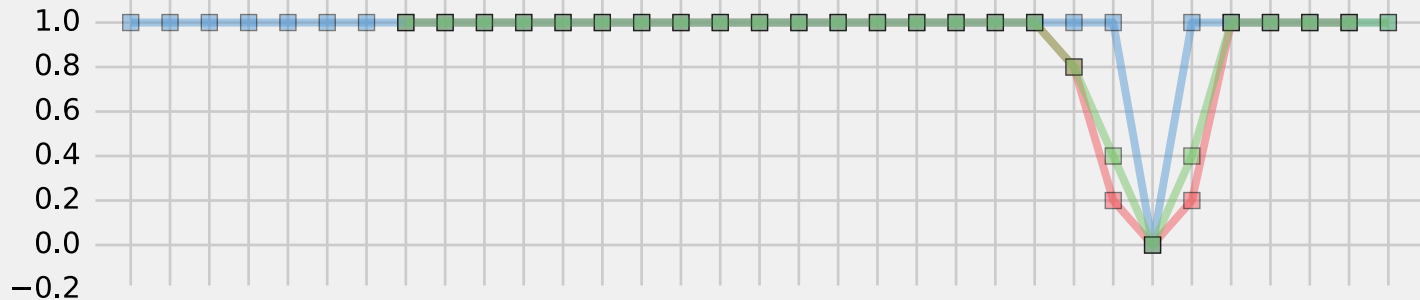

Total FL Reads

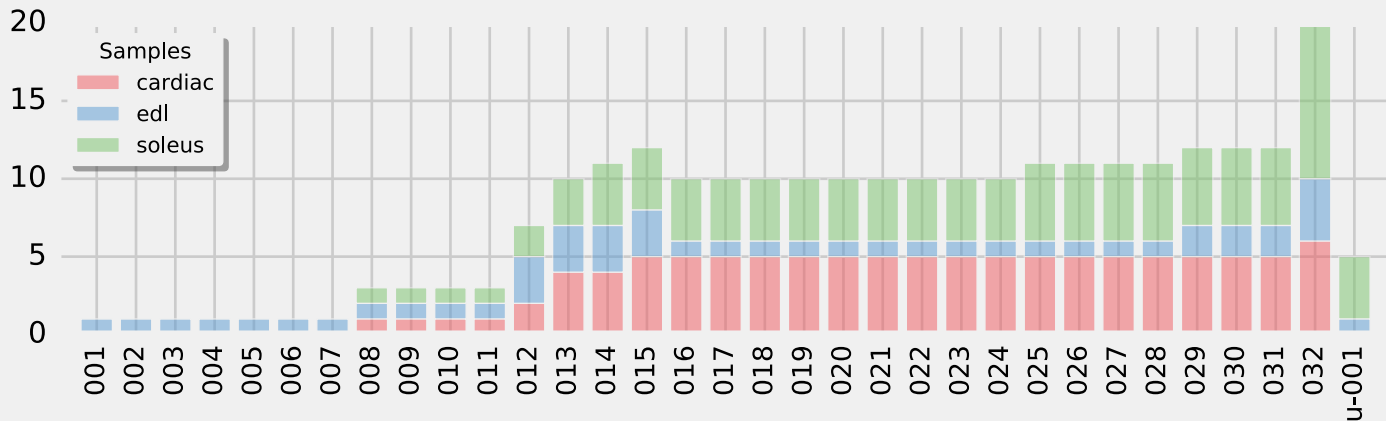

Exonic Part Number

# Kif13a

FL Match / Total

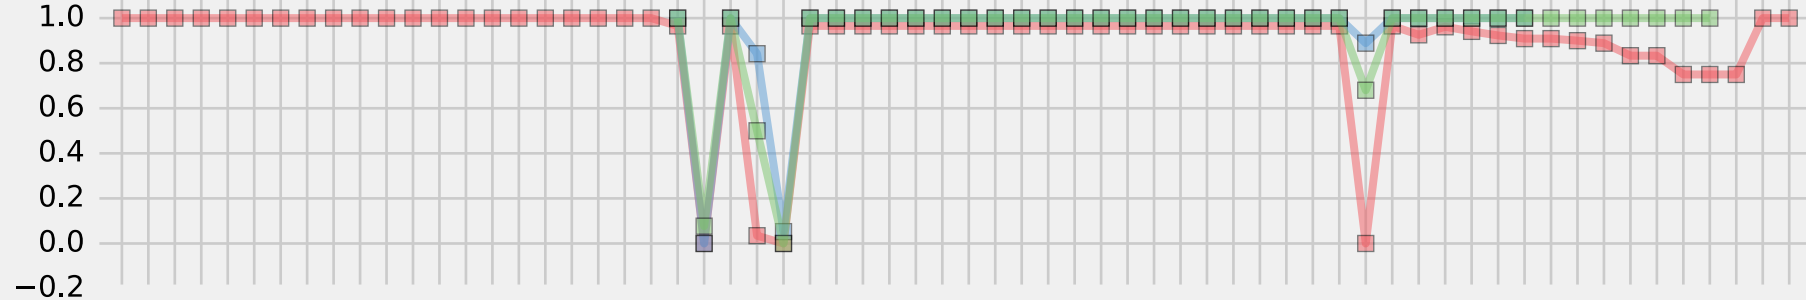

Total FL Reads

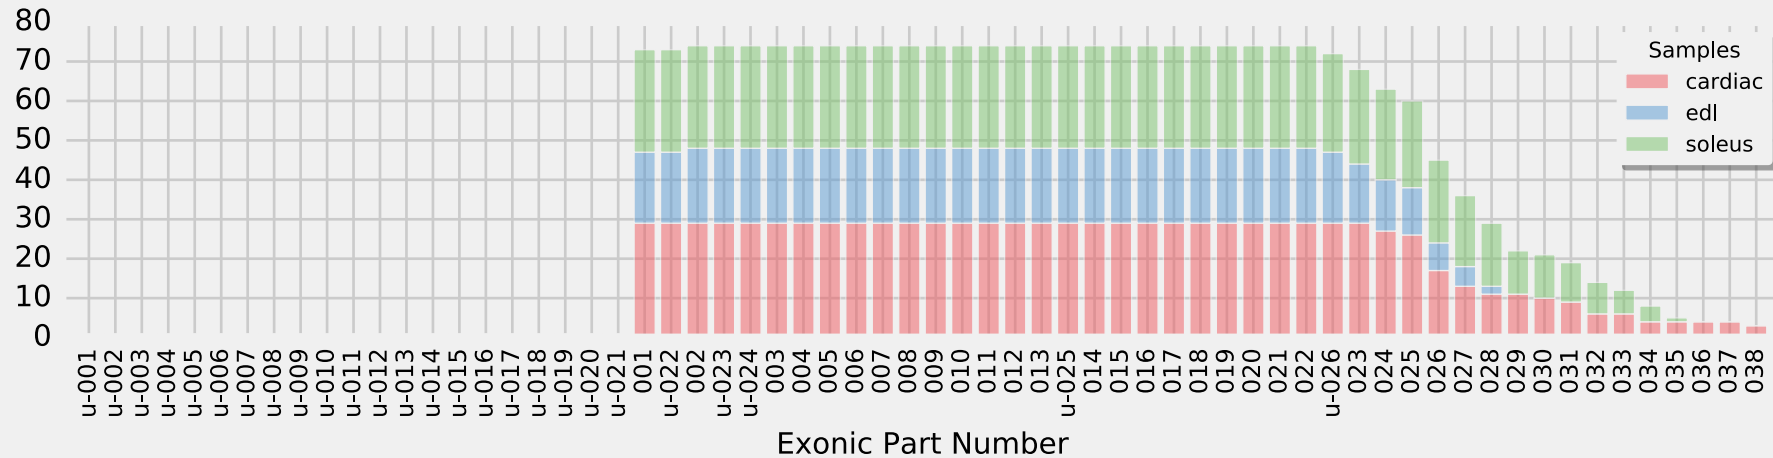

# Kif16b

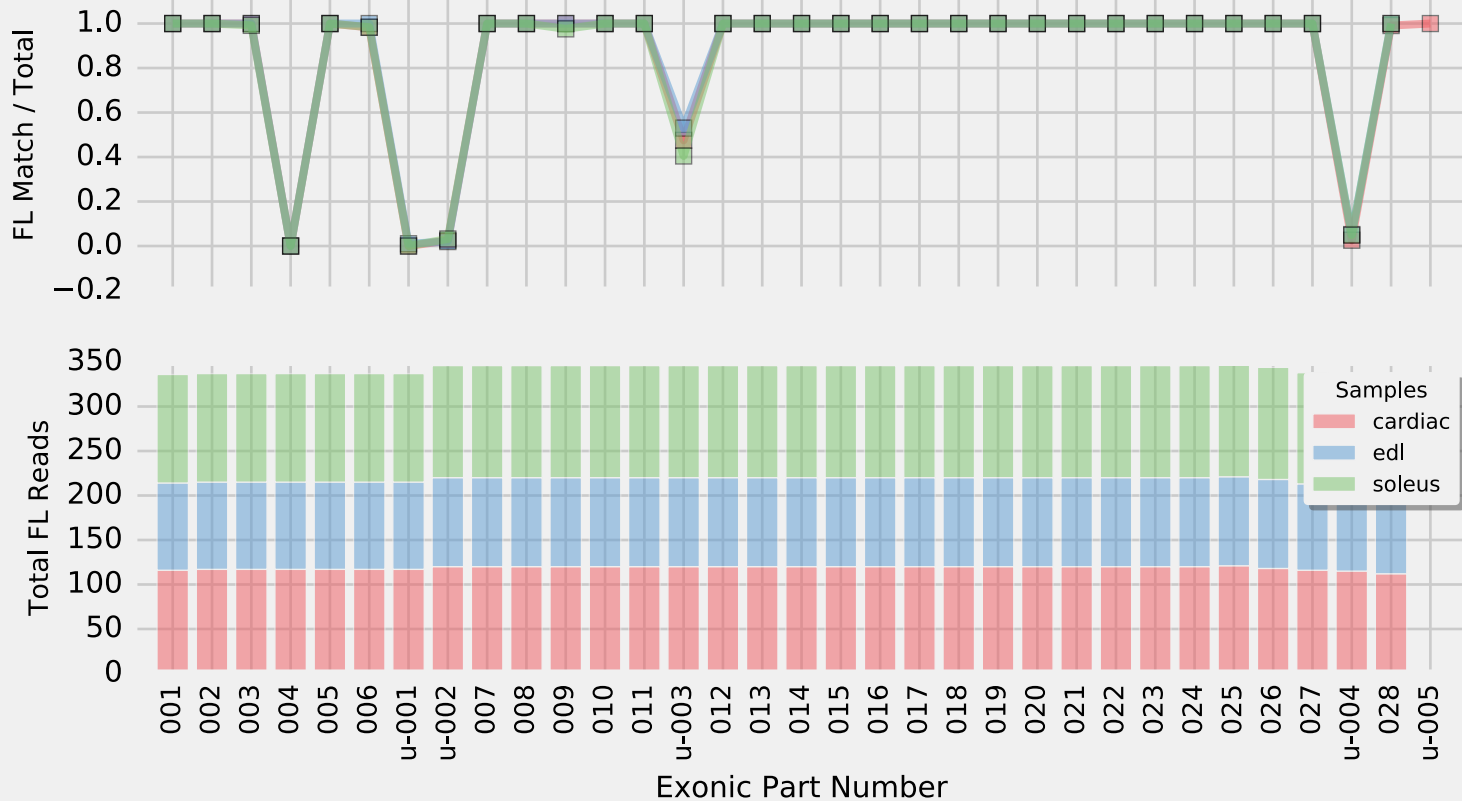

# Kif1b

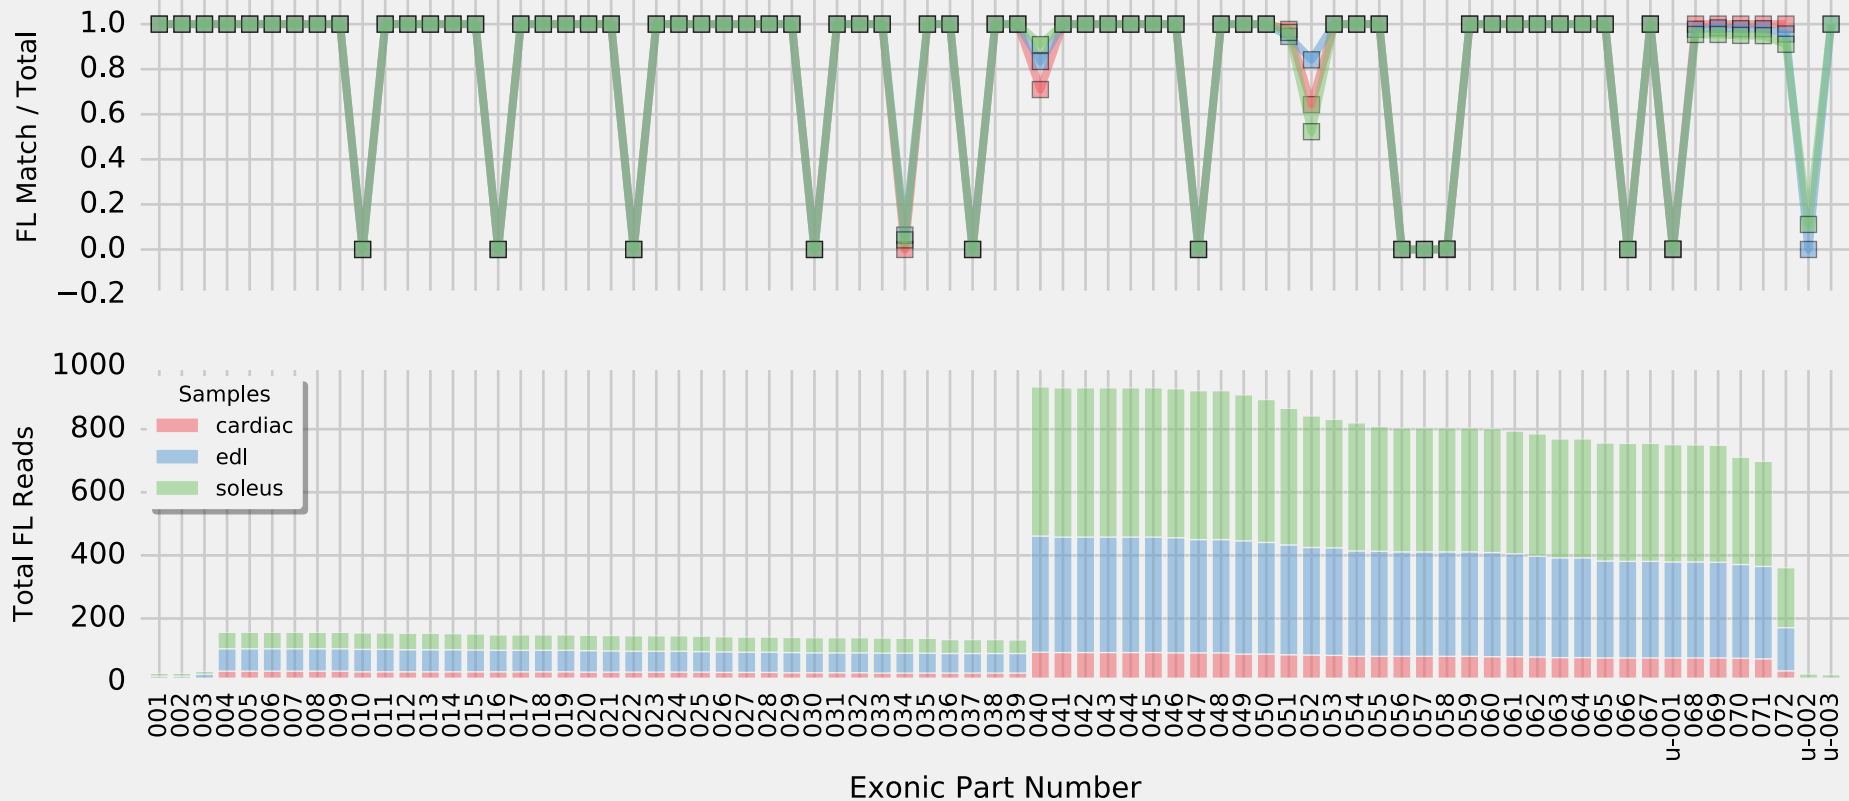

# Kif21a

FL Match / Total

1.0  
0.8  
0.6  
0.4  
0.2  
0.0  
-0.2

Total FL Reads

45  
40  
35  
30  
25  
20  
15  
10  
5  
0

Samples

cardiac  
edl  
soleus

Exonic Part Number

001 002 003 004 005 006 007 008 009 010 011 012 013 014 015 016 017 018 019 020 021 022 023 024 025 026 027 028 029 030 031 032 033 034 035 036 037 038 039

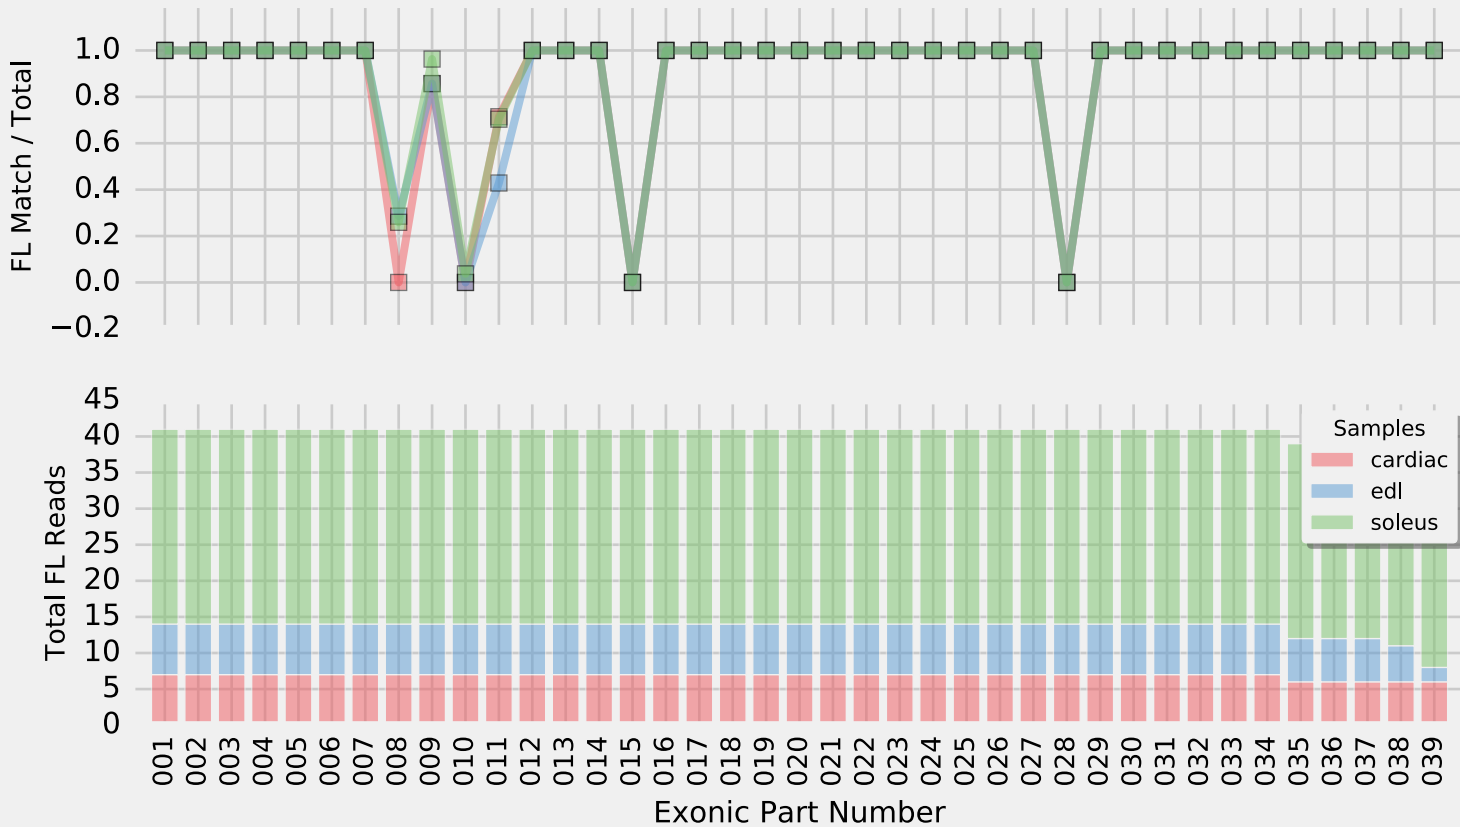



# Kif5b

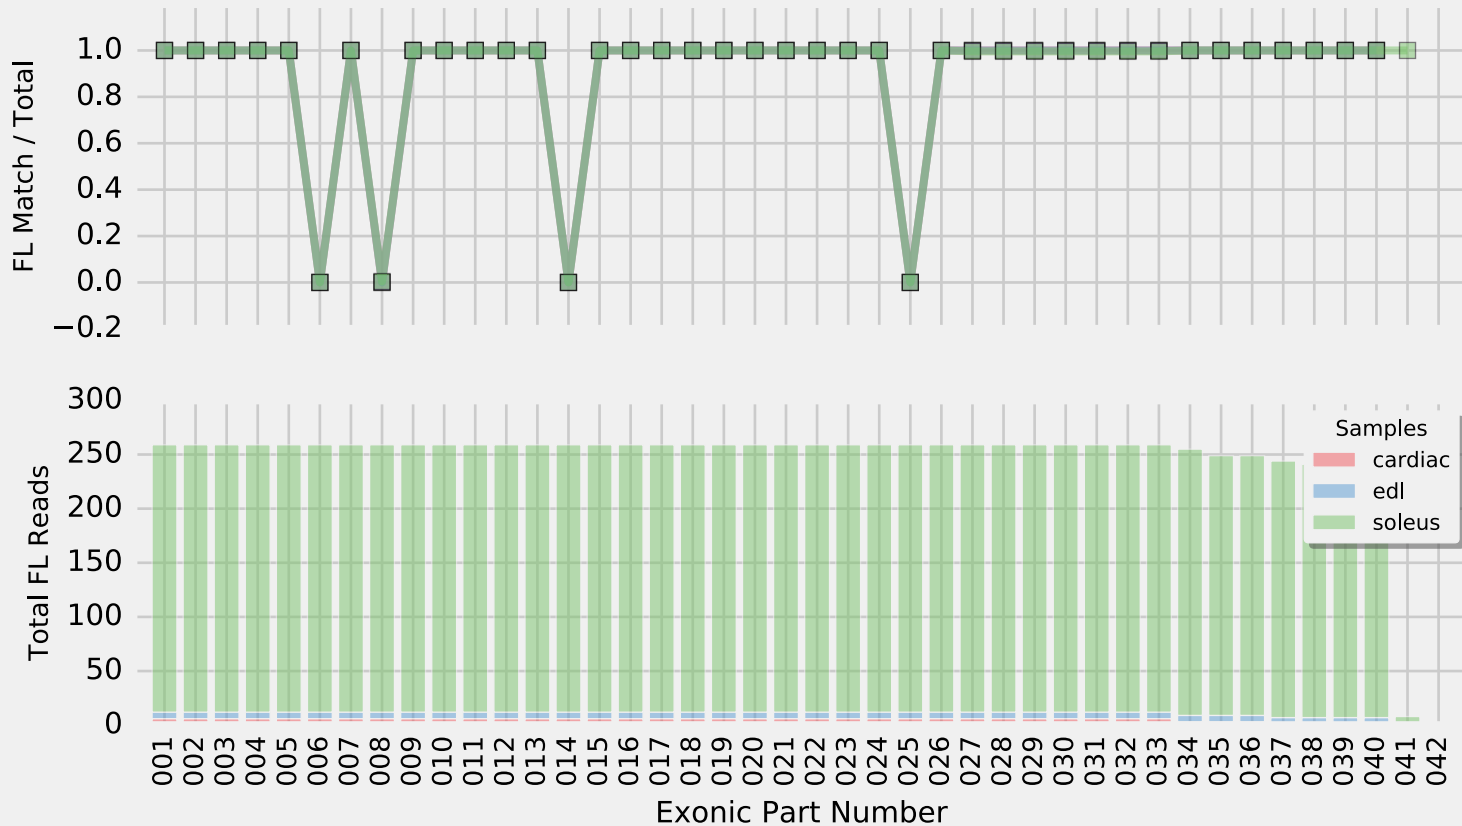

# Kitl

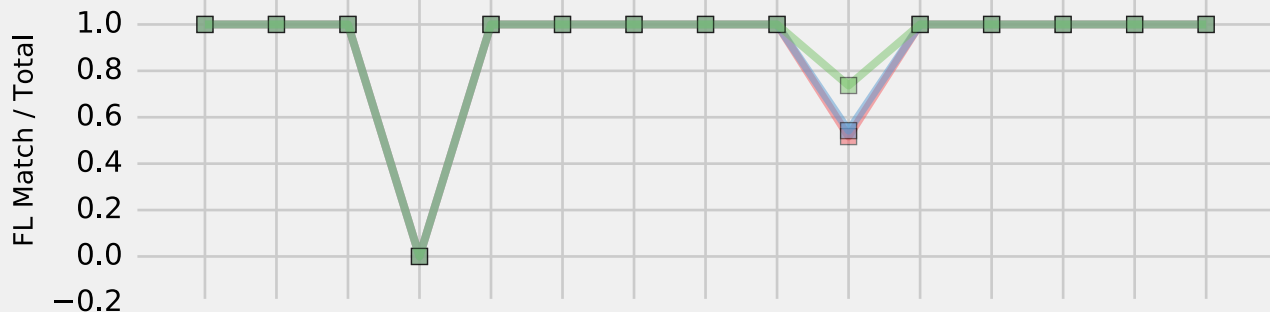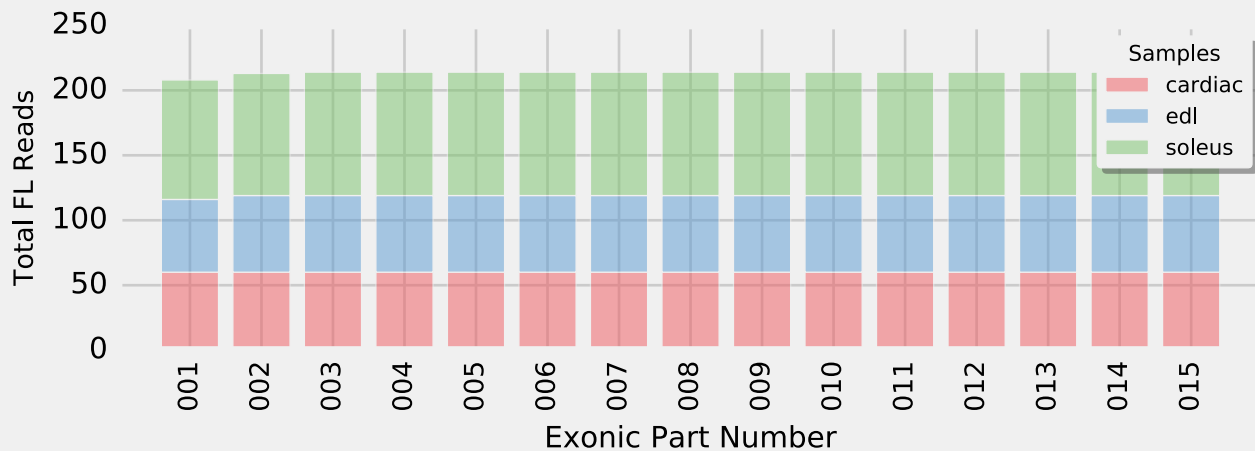

# KIhl24

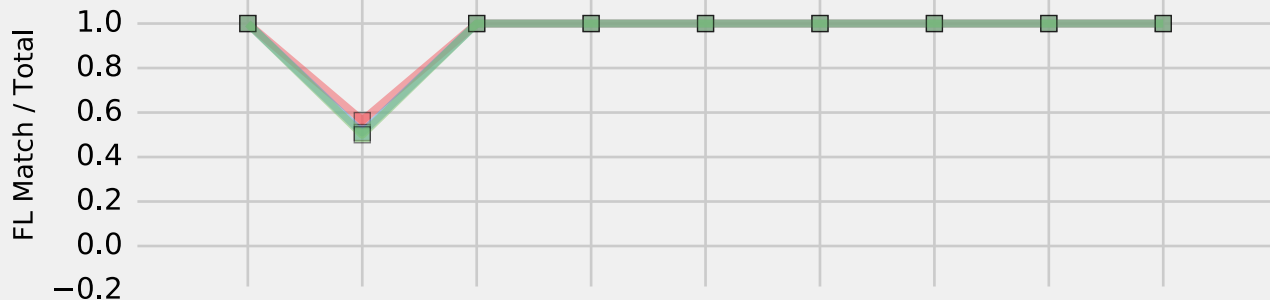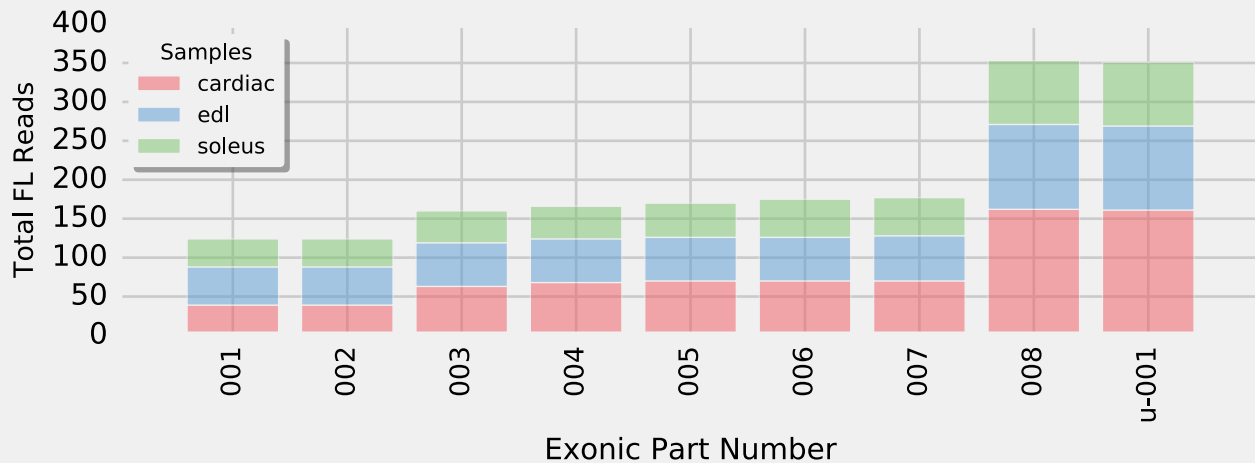

# KIhl31

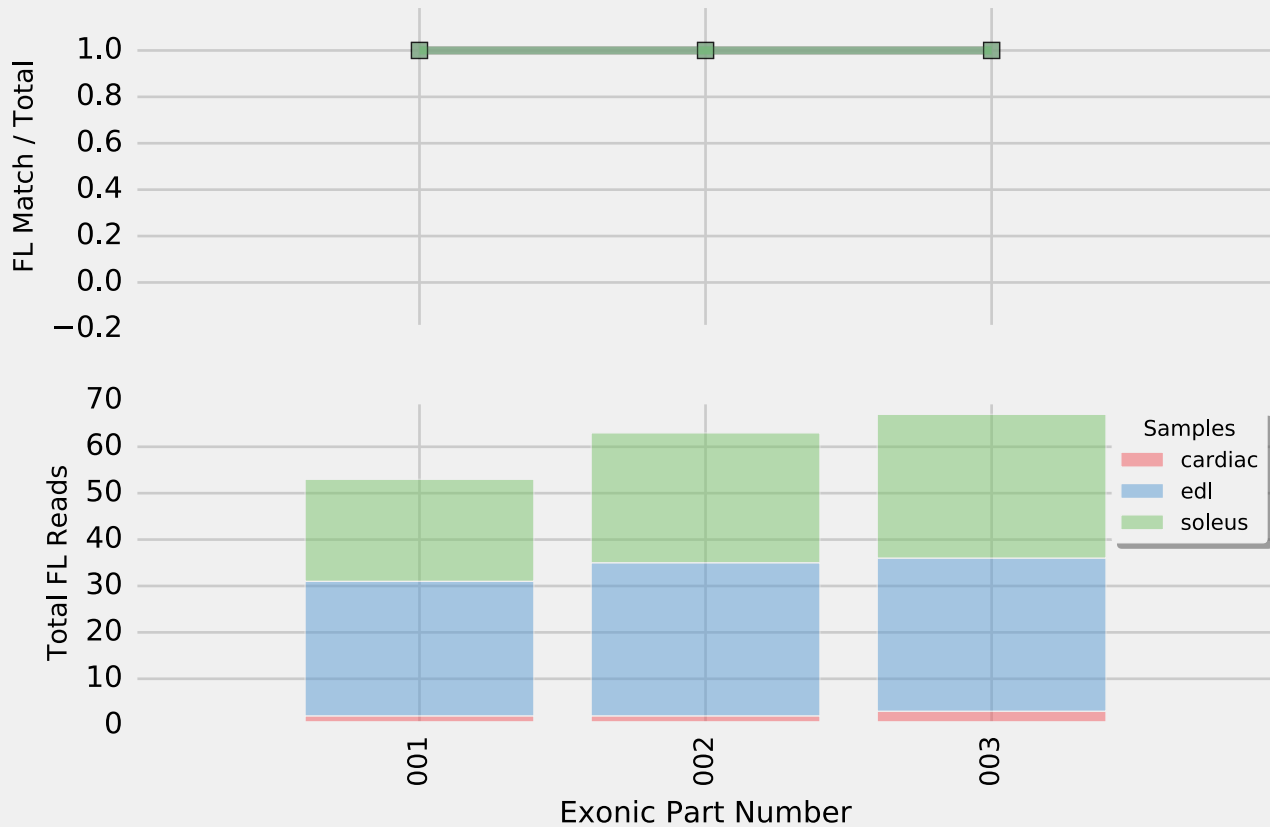

# Kmt2c

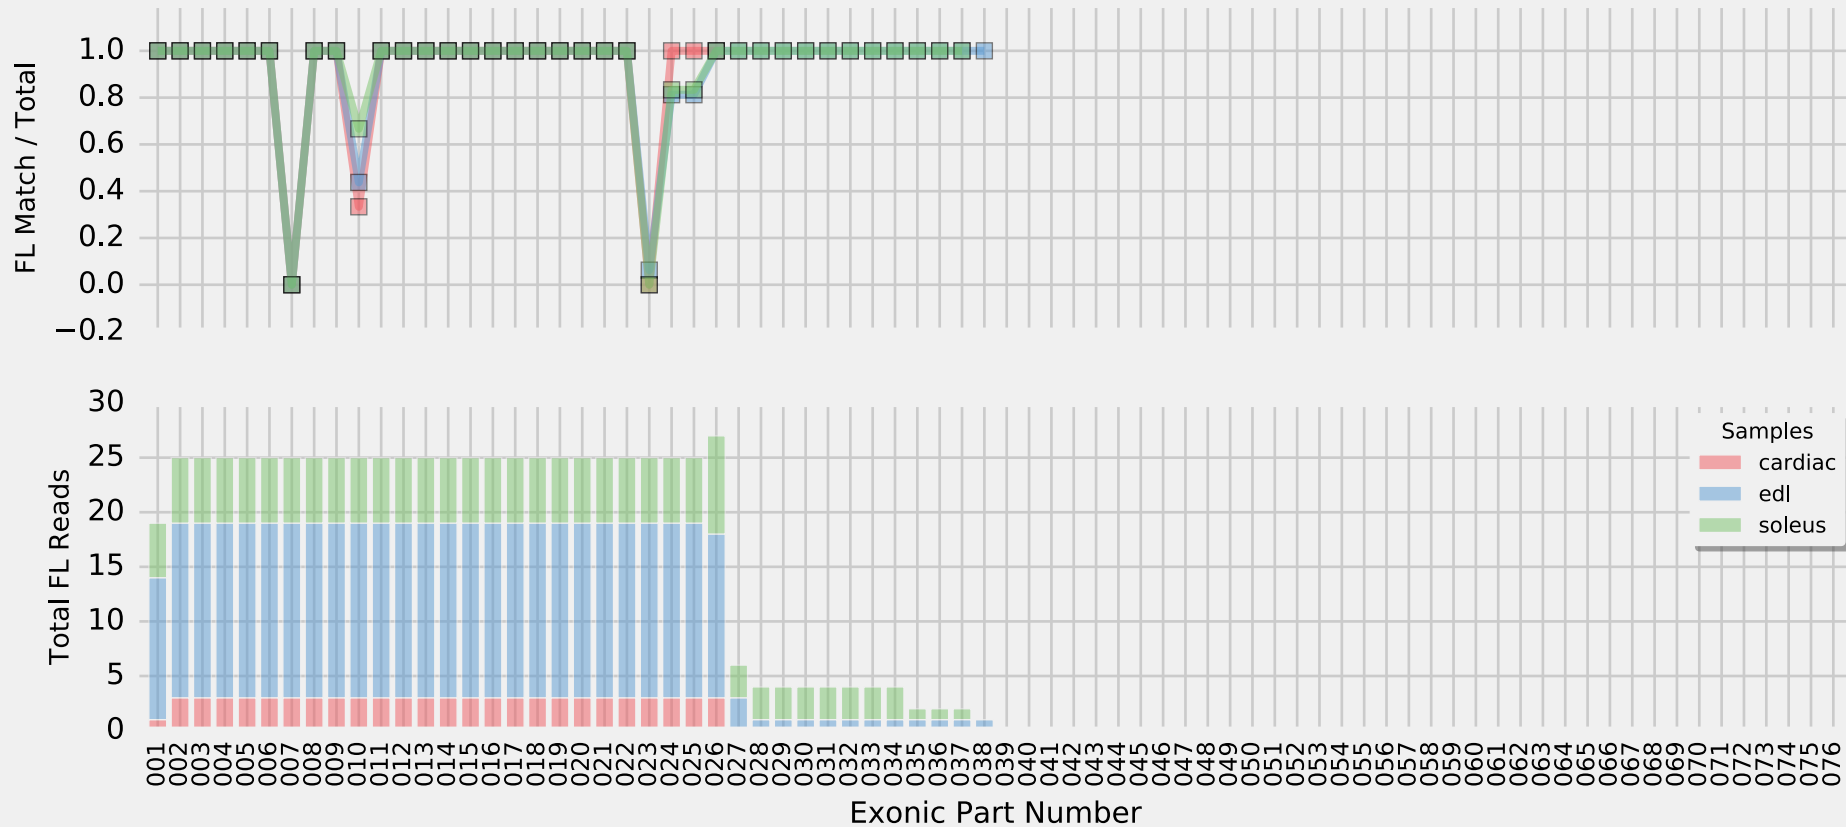

# Kpna1

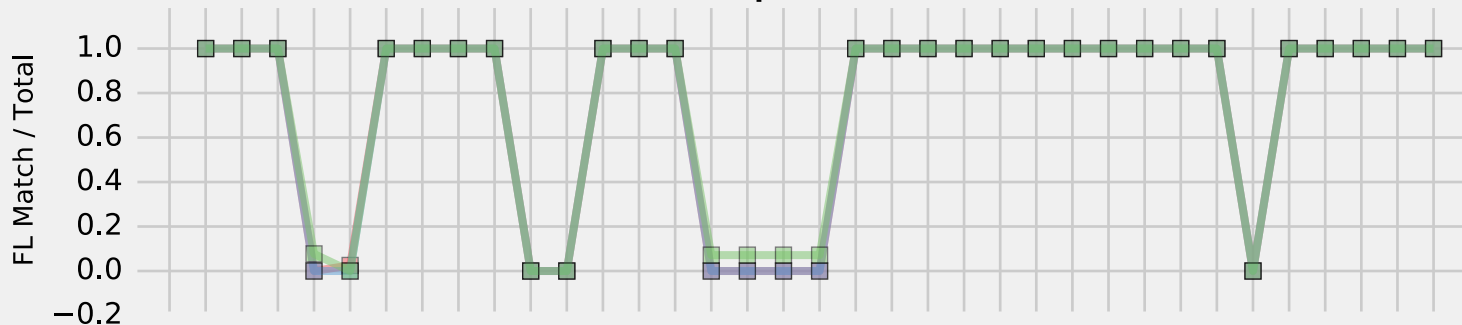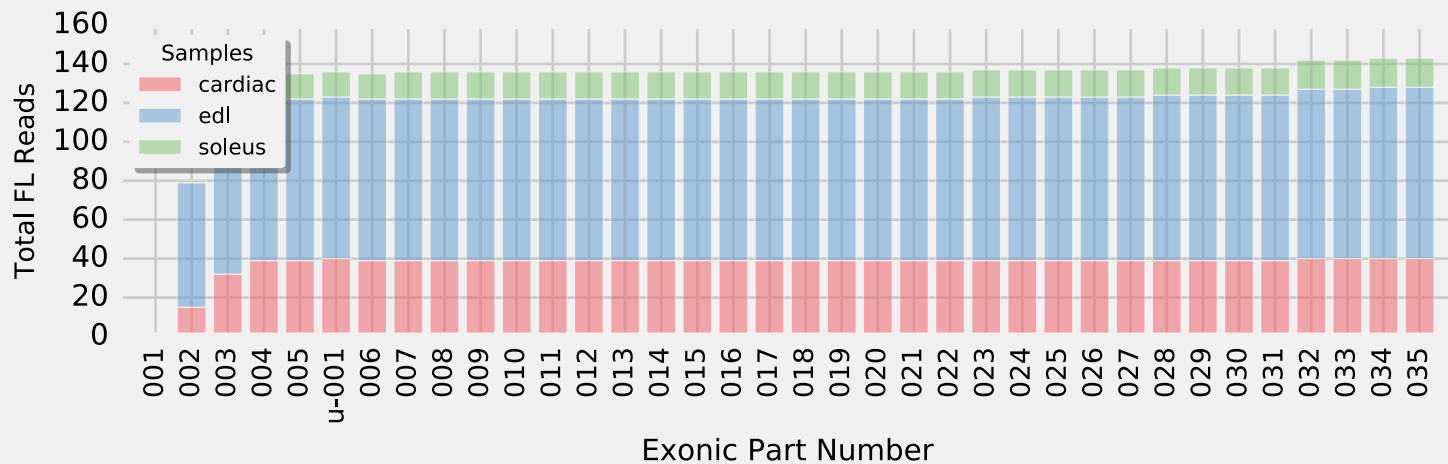

# Kpnb1

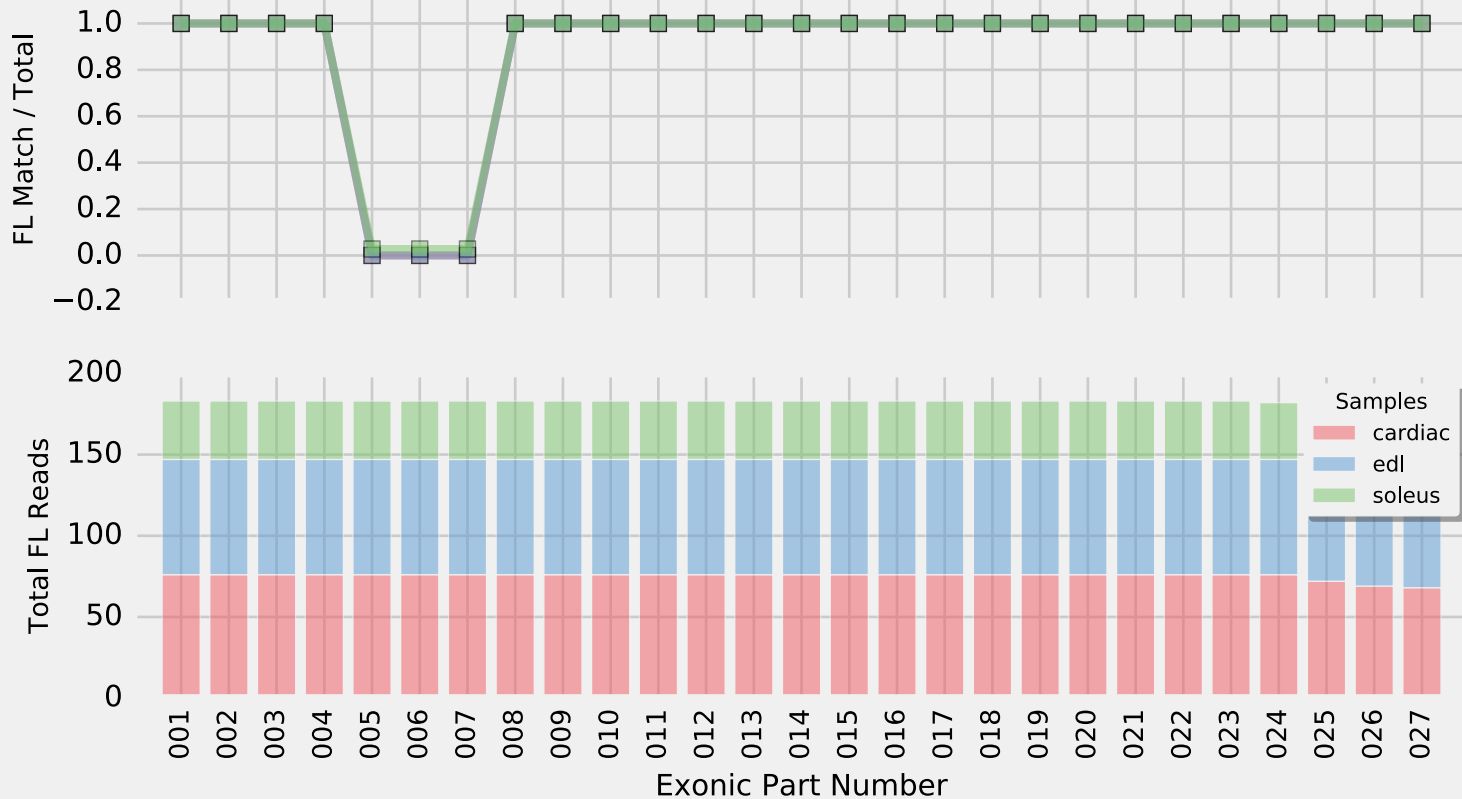

# Krba1

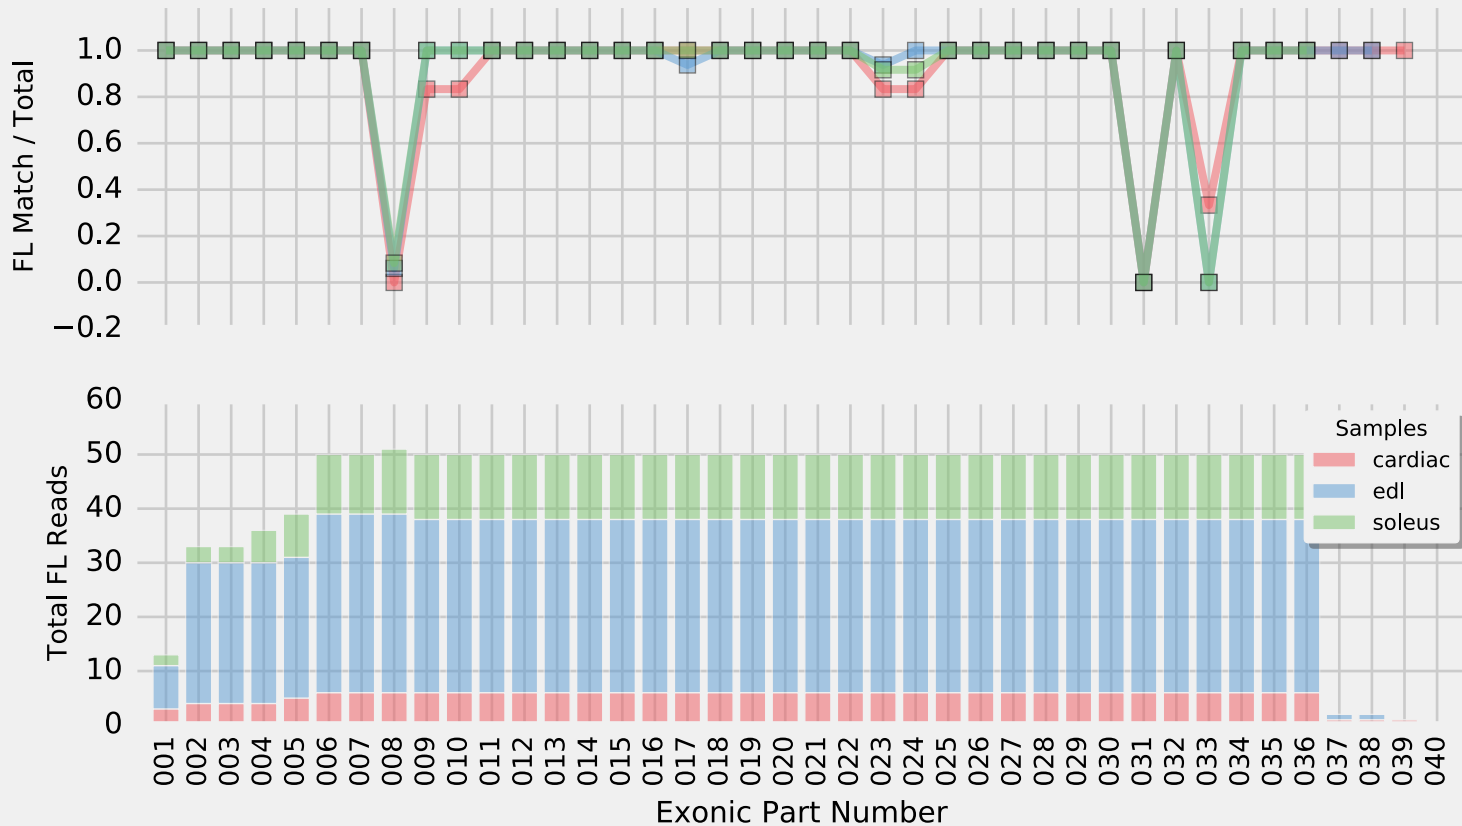



# Ksr1

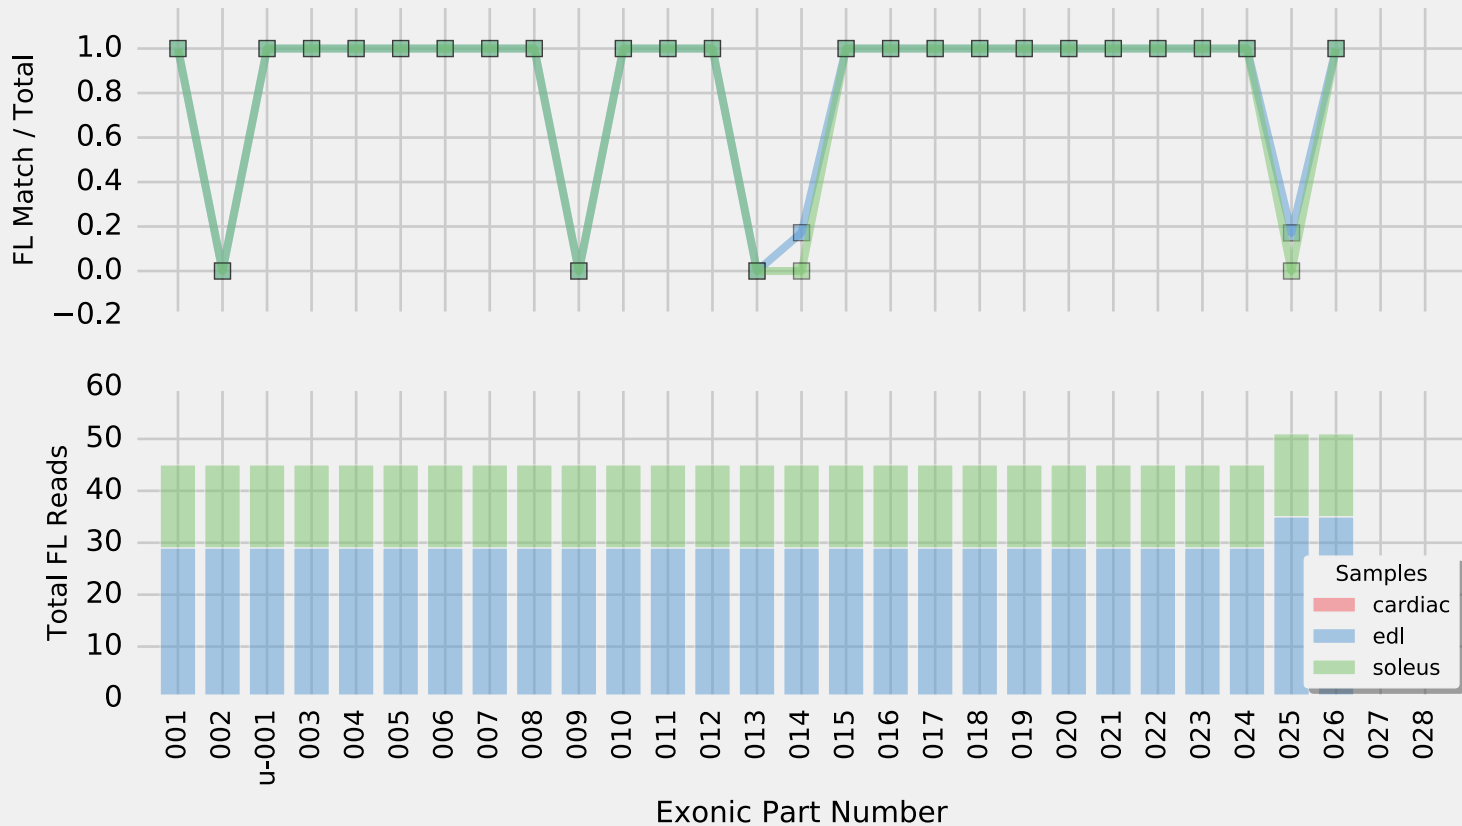

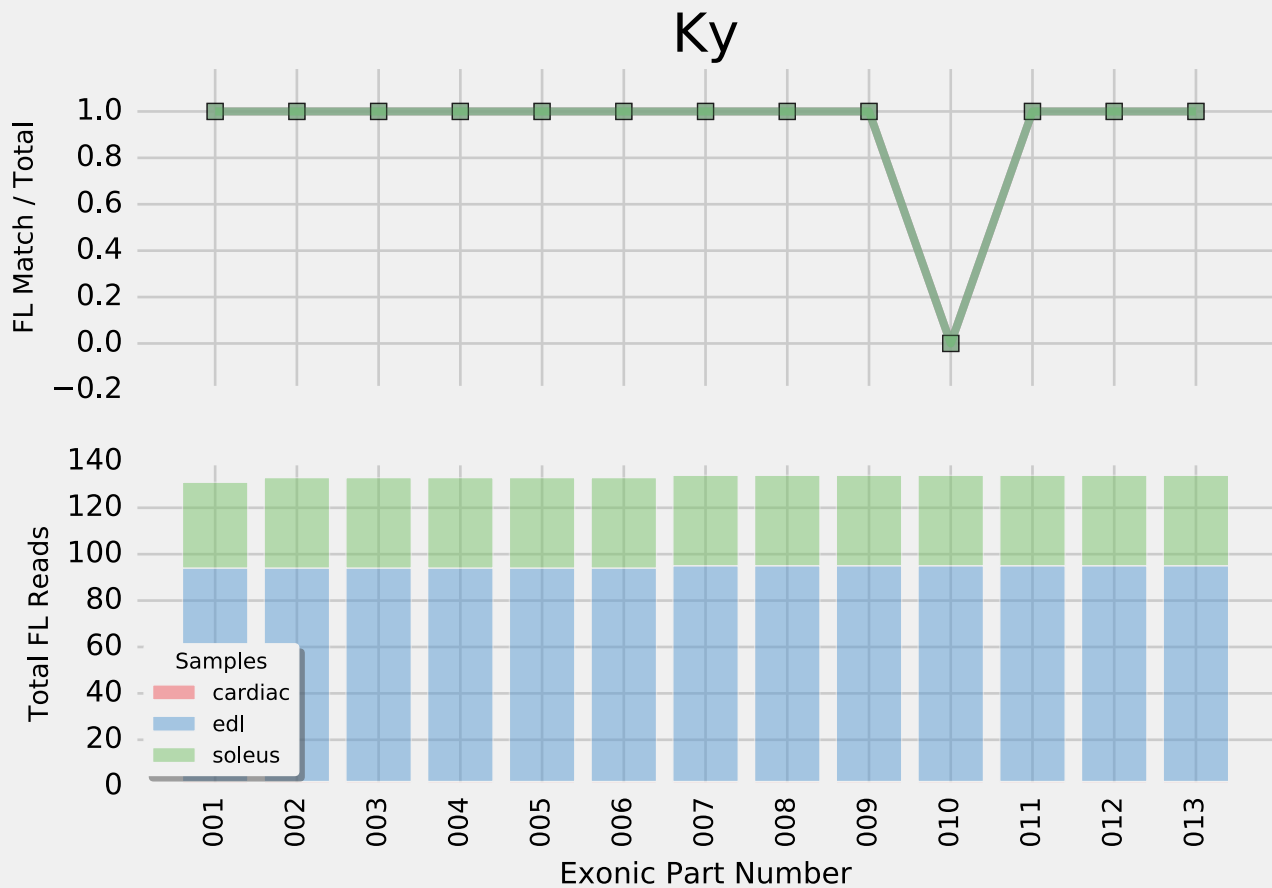

# Lama2

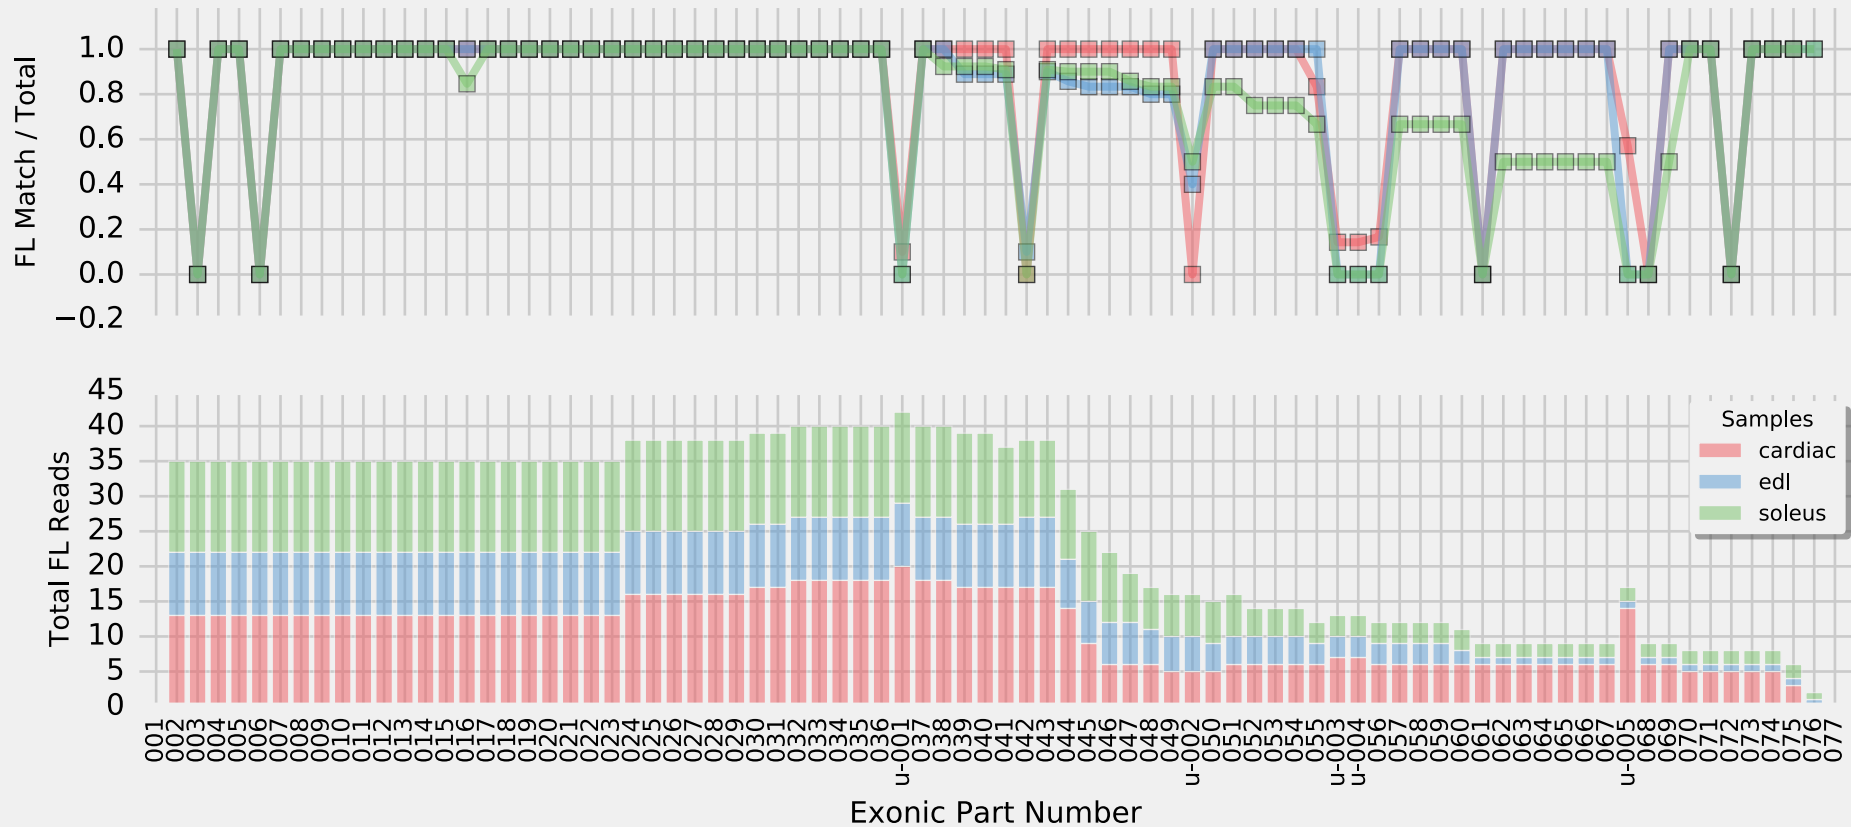

# Lama4

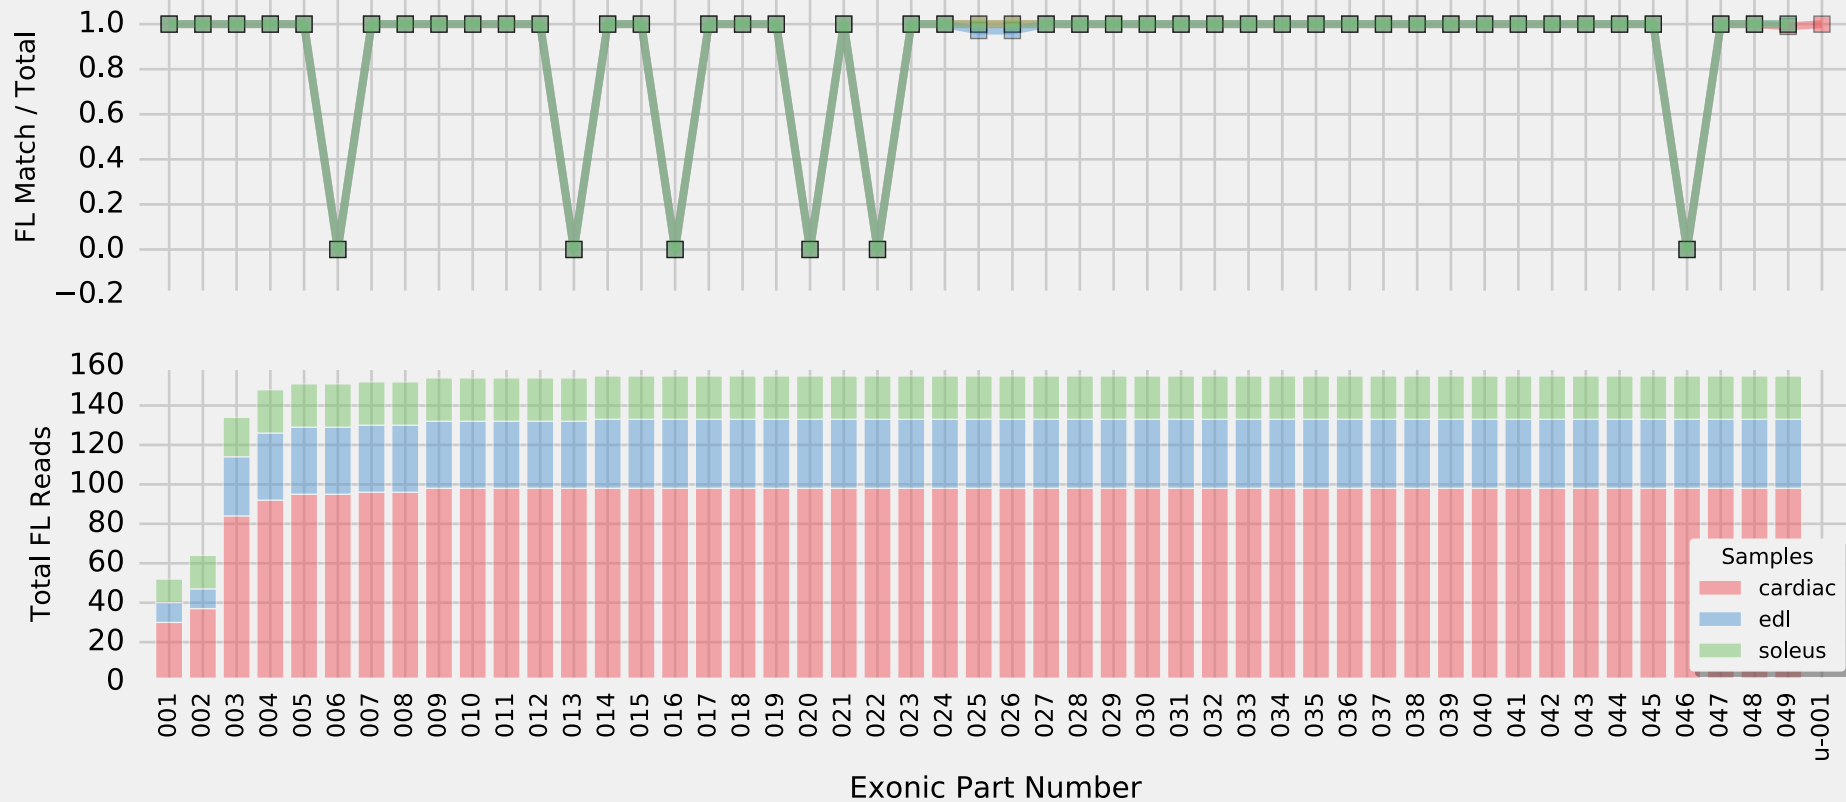

# Lama5

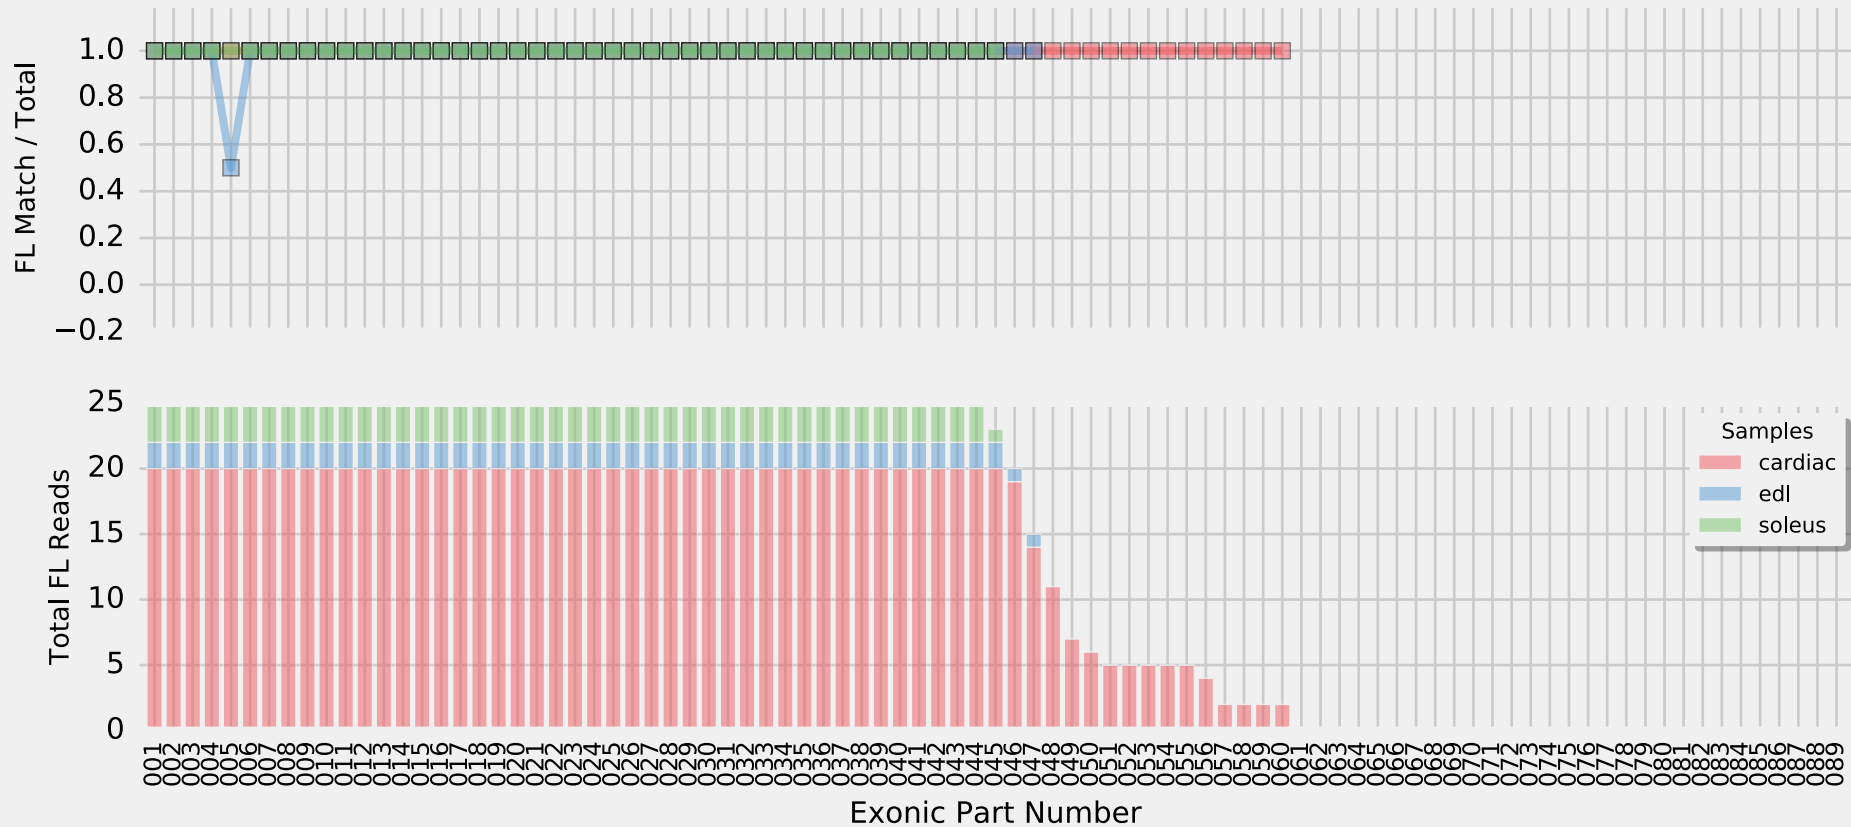

# Lamb1

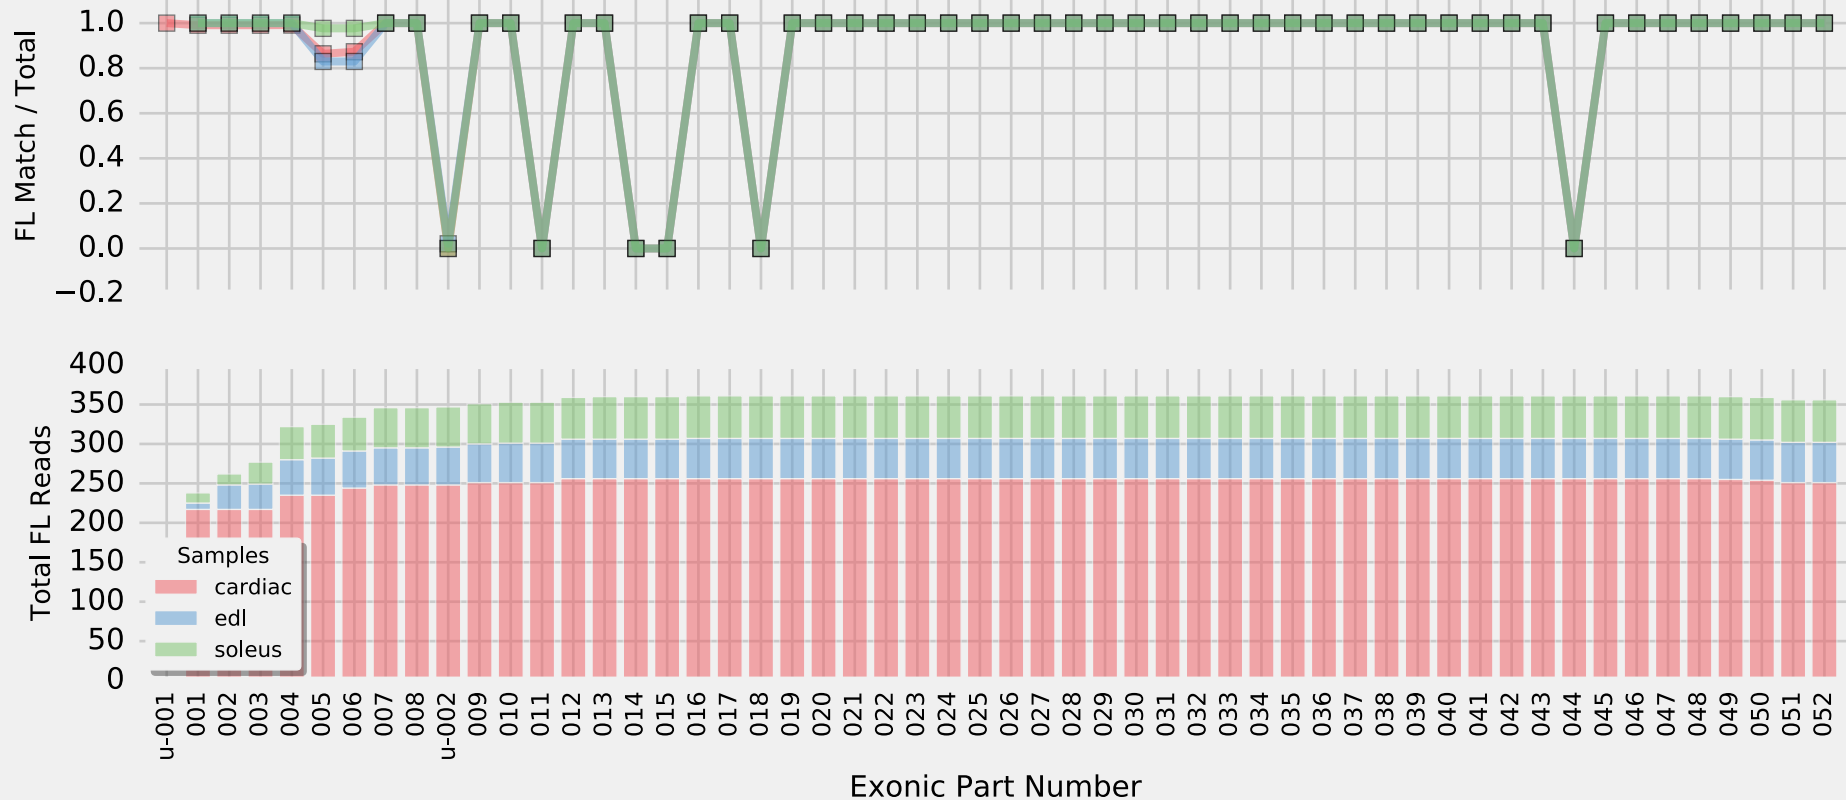

# Lamb2

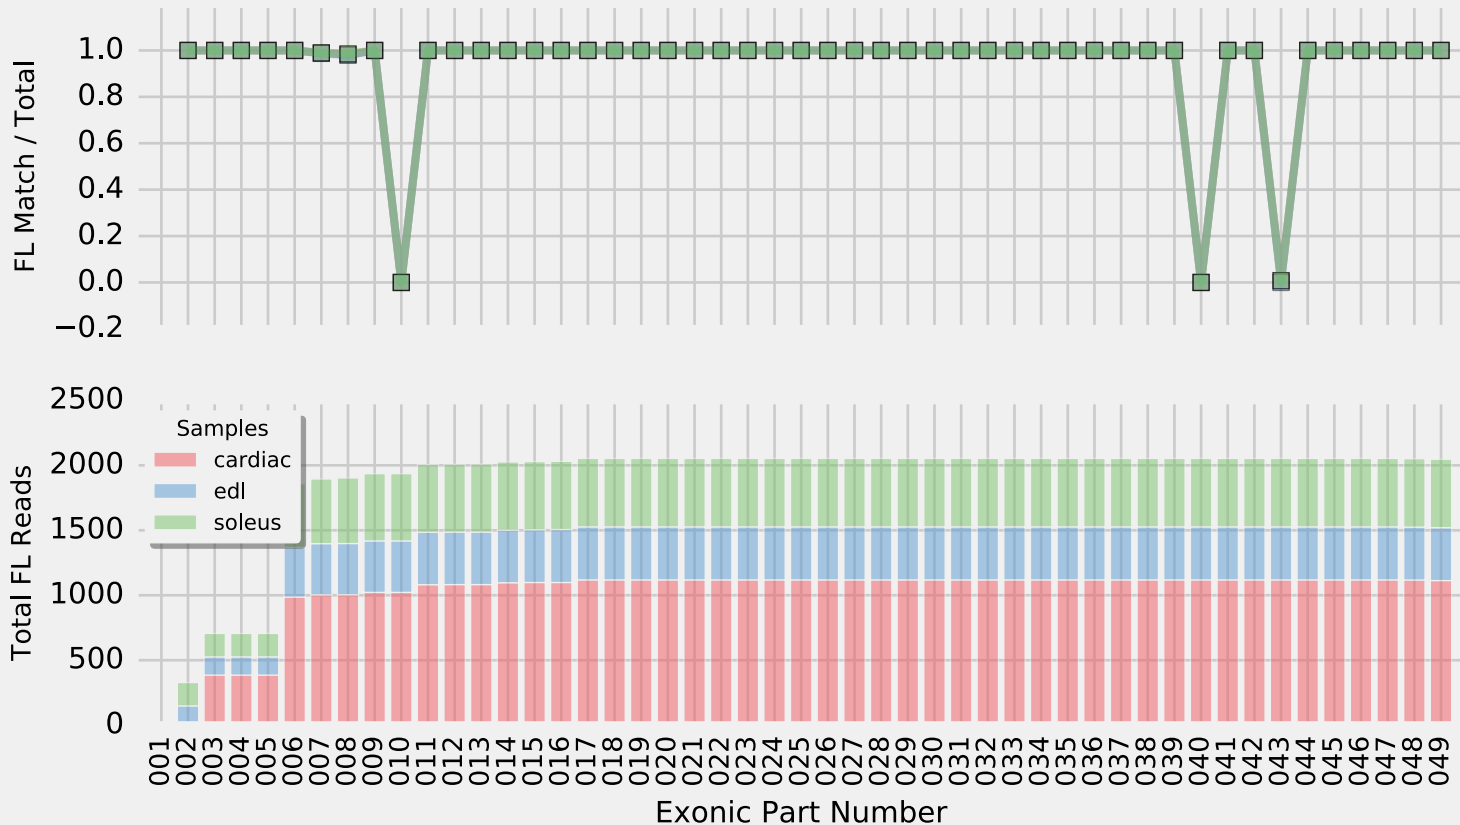

# Lamc1

FL Match / Total

1.0  
0.8  
0.6  
0.4  
0.2  
0.0  
-0.2

Total FL Reads

70  
60  
50  
40  
30  
20  
10  
0

Samples  
cardiac  
edl  
soleus

Exonic Part Number

001 002 003 004 005 006 007 008 009 010 011 012 013 014 015 016 017 018 019 020 021 022 023 024 025 026 027 028 029 030 031 032 033 034 035 036 037

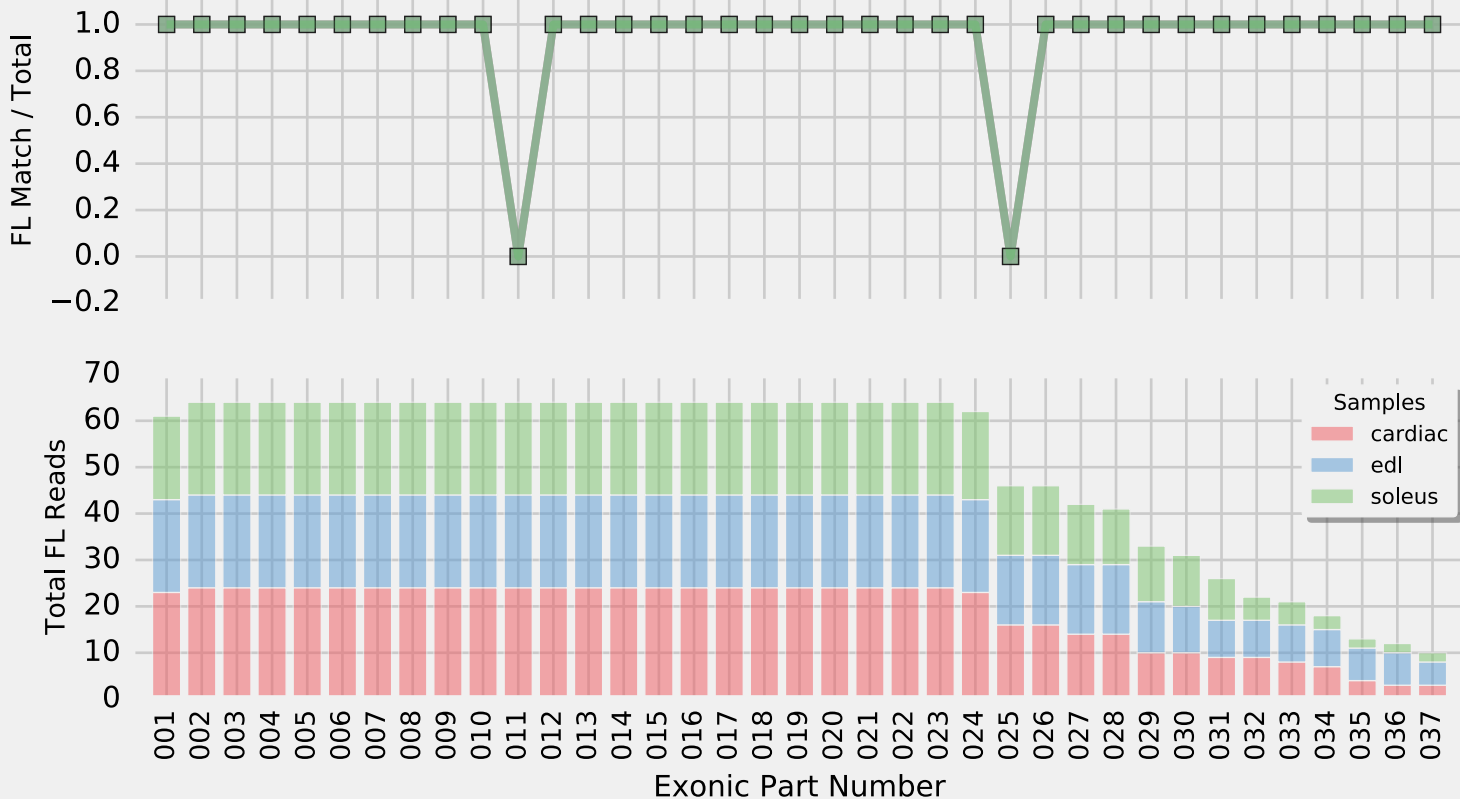



# Larp4b

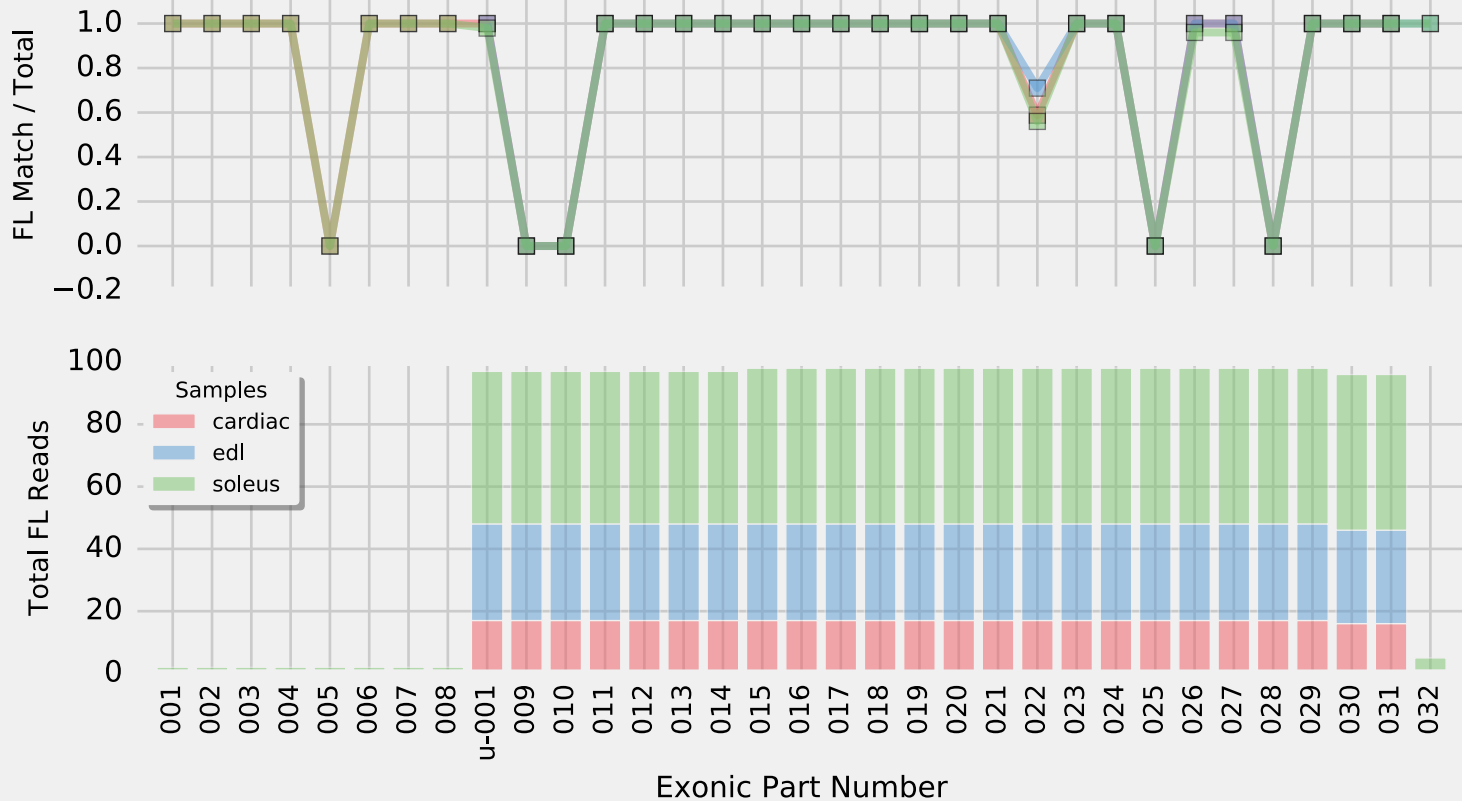

# Leng8

FL Match / Total

1.0  
0.8  
0.6  
0.4  
0.2  
0.0  
-0.2

Total FL Reads

60  
50  
40  
30  
20  
10  
0

001 002 003 004 005 006 007 008 009 010 011 012 013 014 015 016 017 018 019 020 021 022 023 024 025 026 027 028 029 030 031 032 033 034 035 036 037 038 039 040

Exonic Part Number

Samples  
cardiac  
edl  
soleus

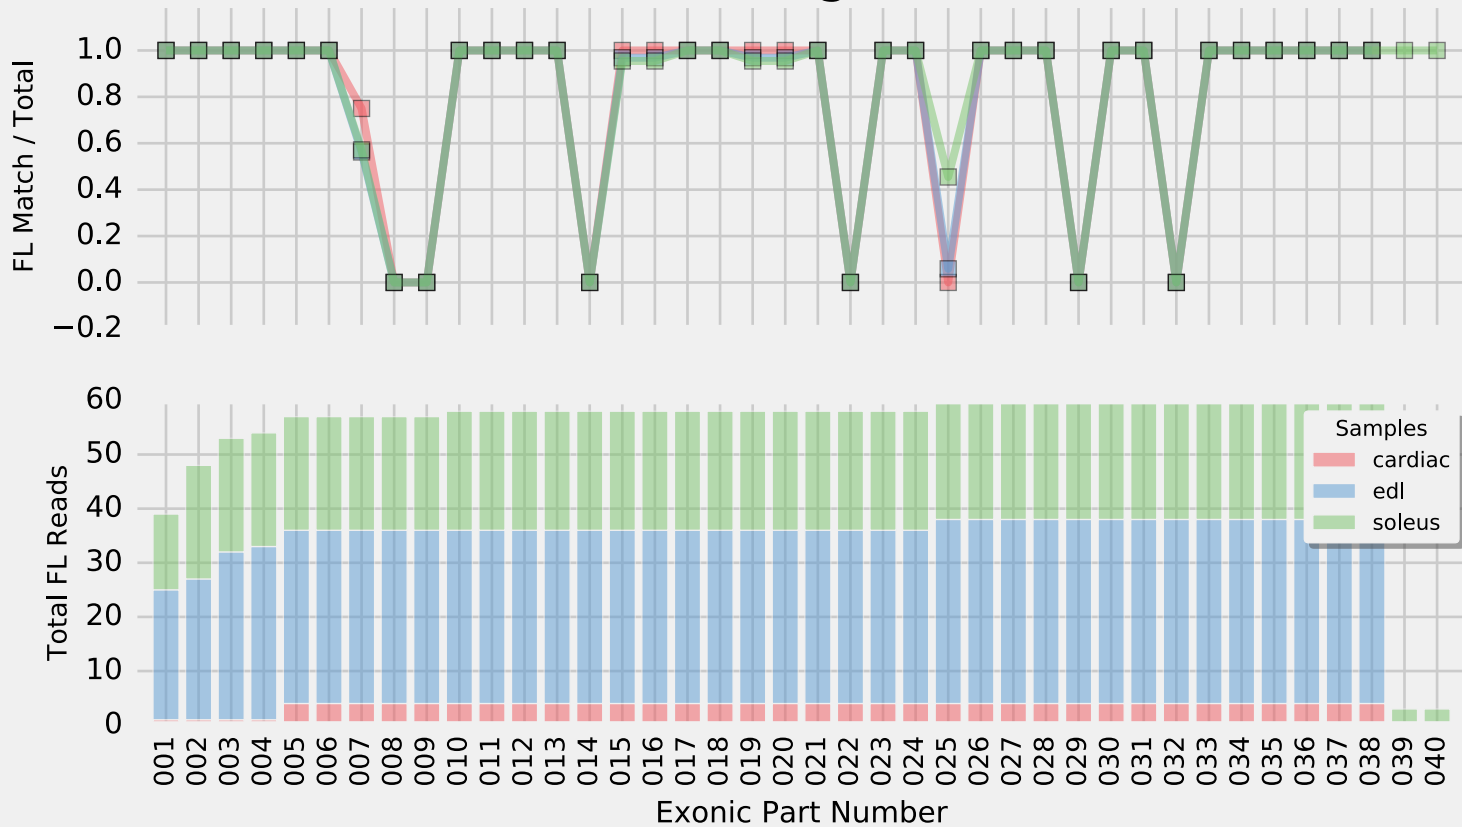

# Lig3

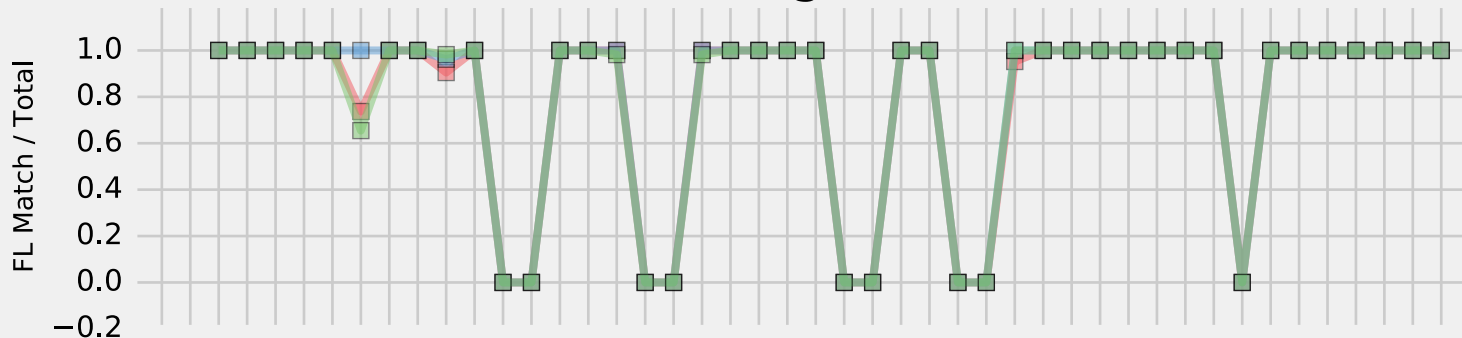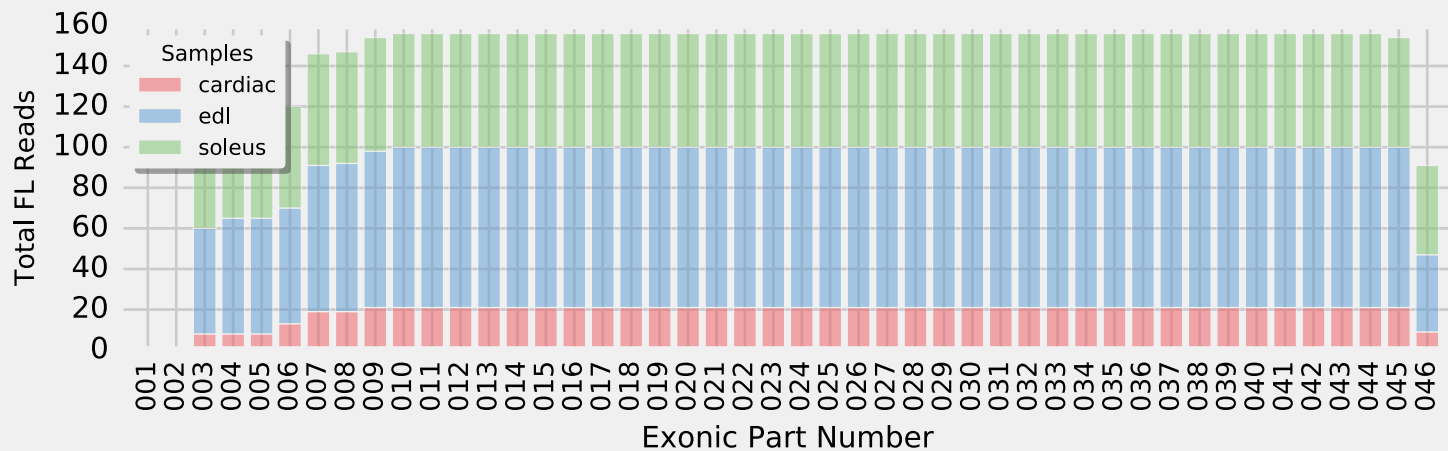

# Limch1

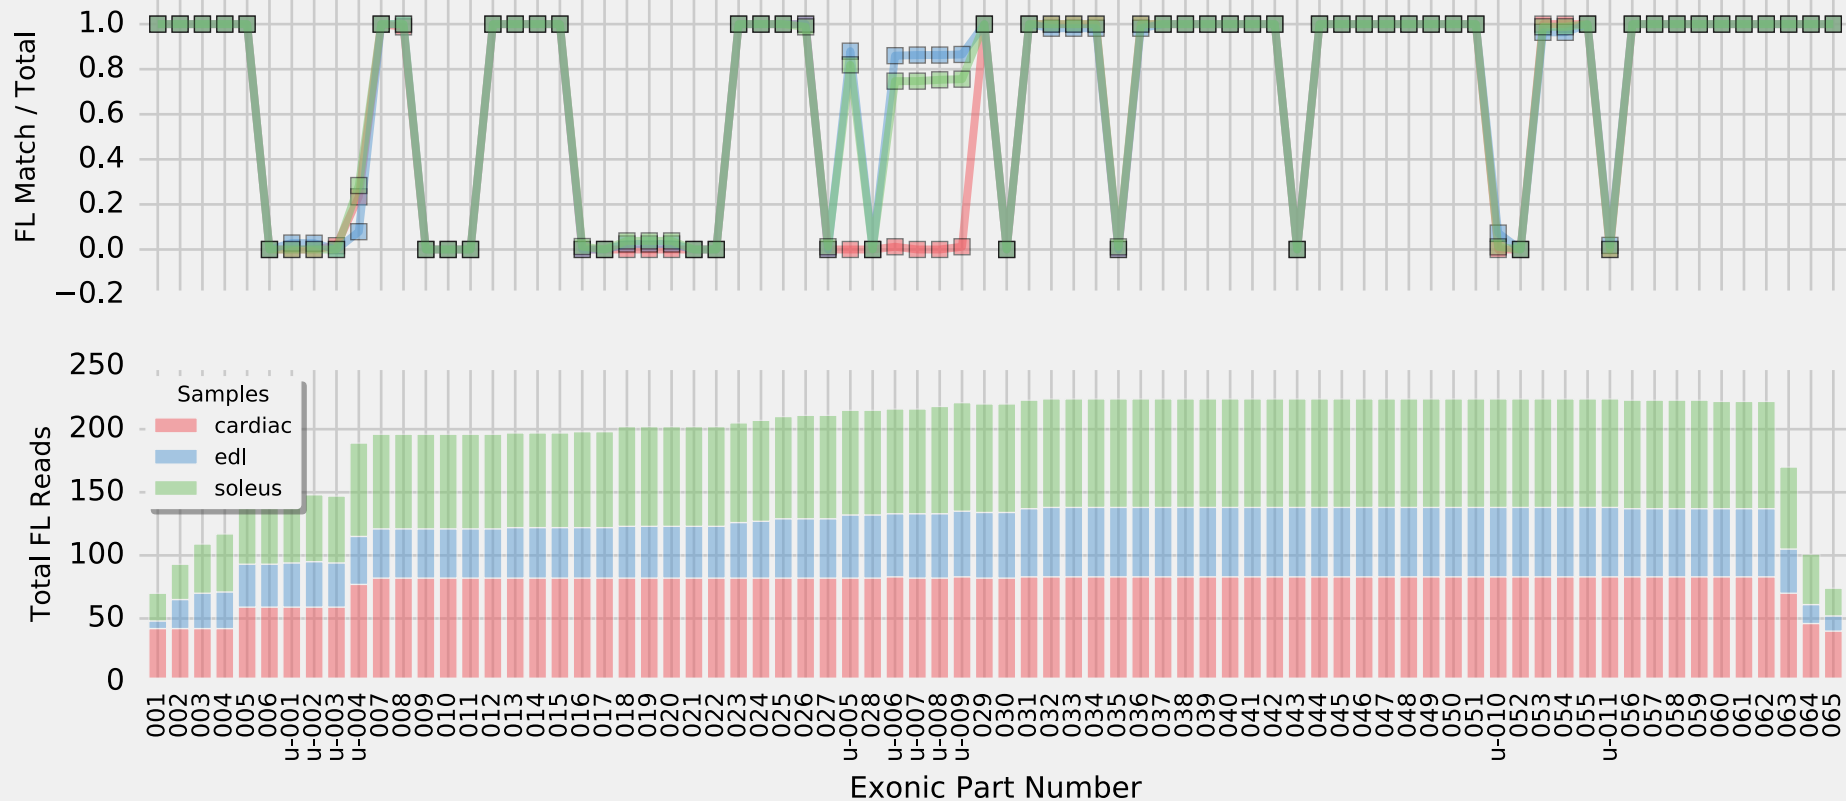

# Lman2l

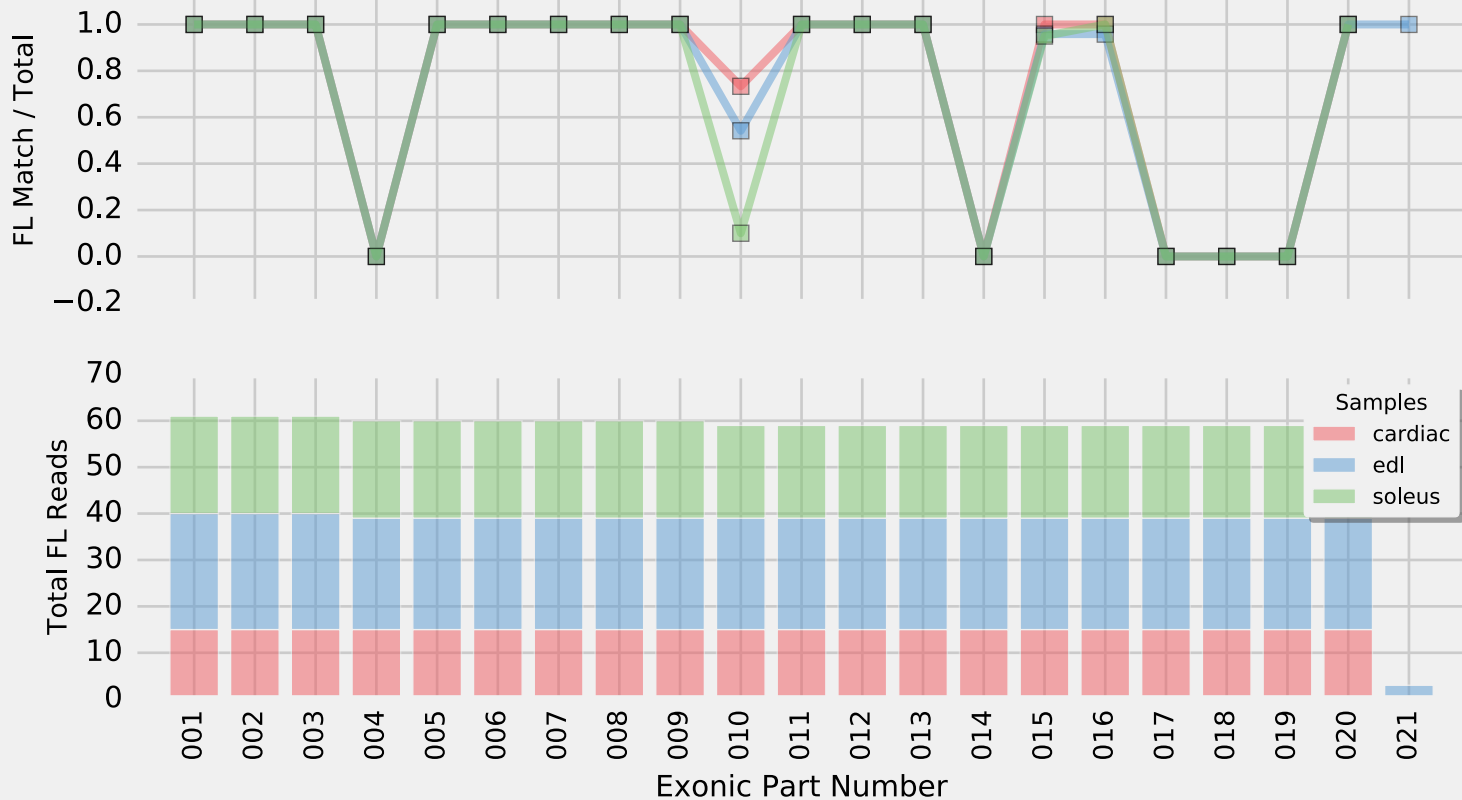

# Lmbrd1

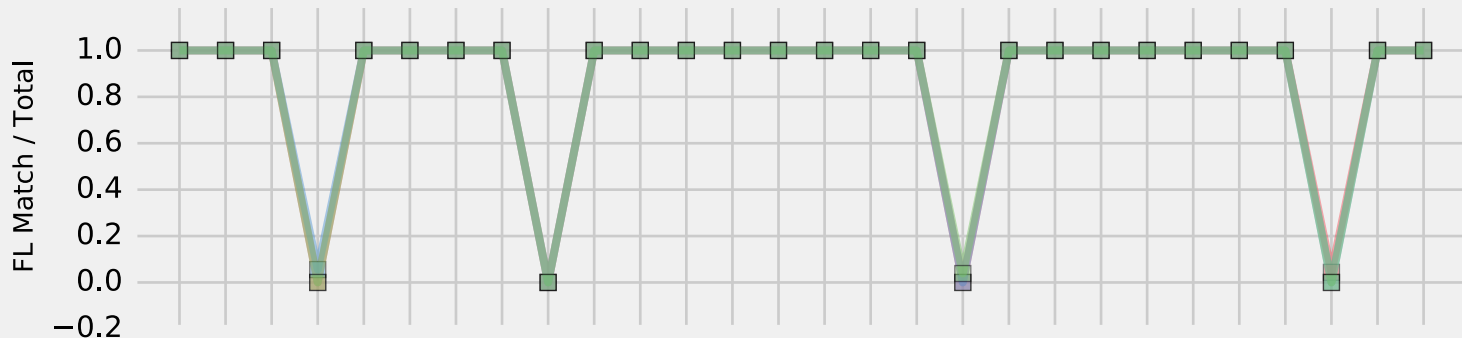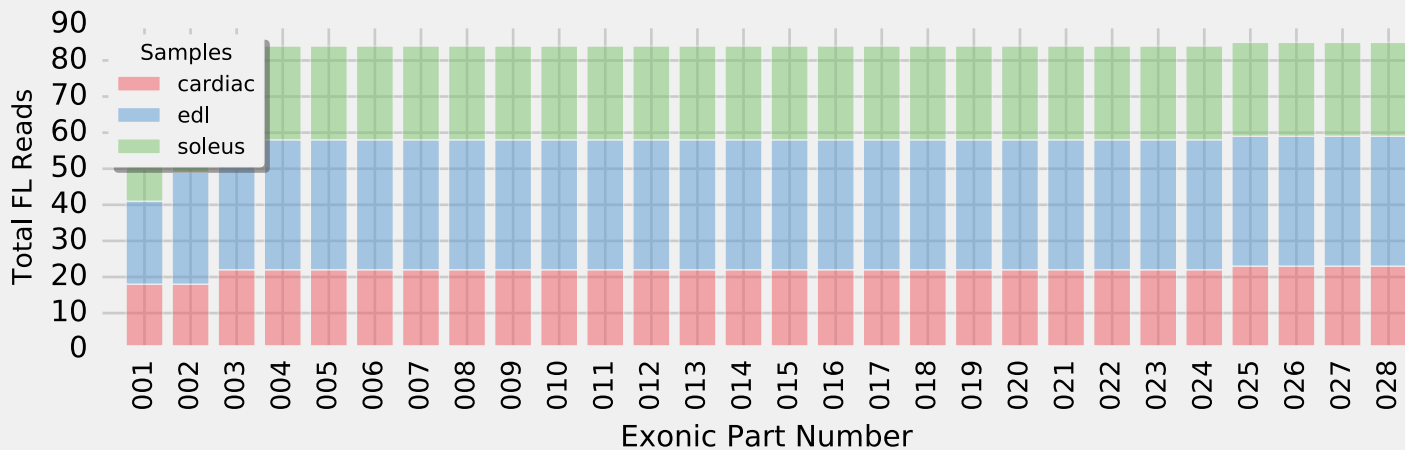

# Lmo7

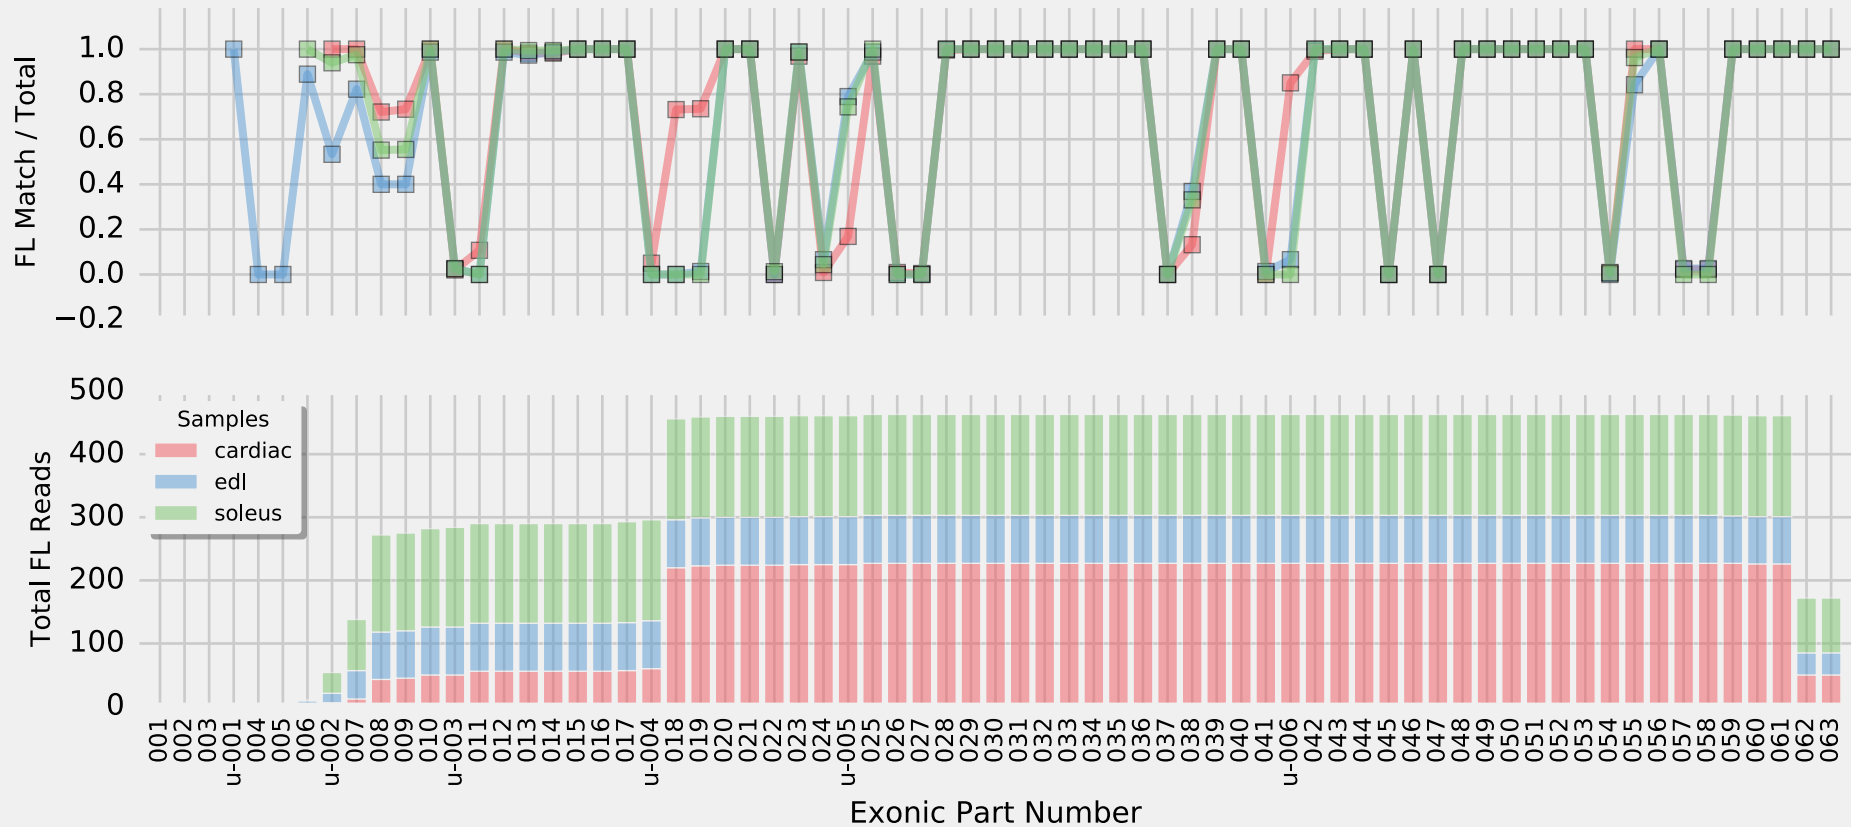

# Lnpep

FL Match / Total

1.0  
0.8  
0.6  
0.4  
0.2  
0.0  
-0.2

Total FL Reads

70  
60  
50  
40  
30  
20  
10  
0

Samples

cardiac

edl

soleus

Exonic Part Number

001 002 003 004 005 006 007 008 009 010 011 012 013 014 015 016 017 018

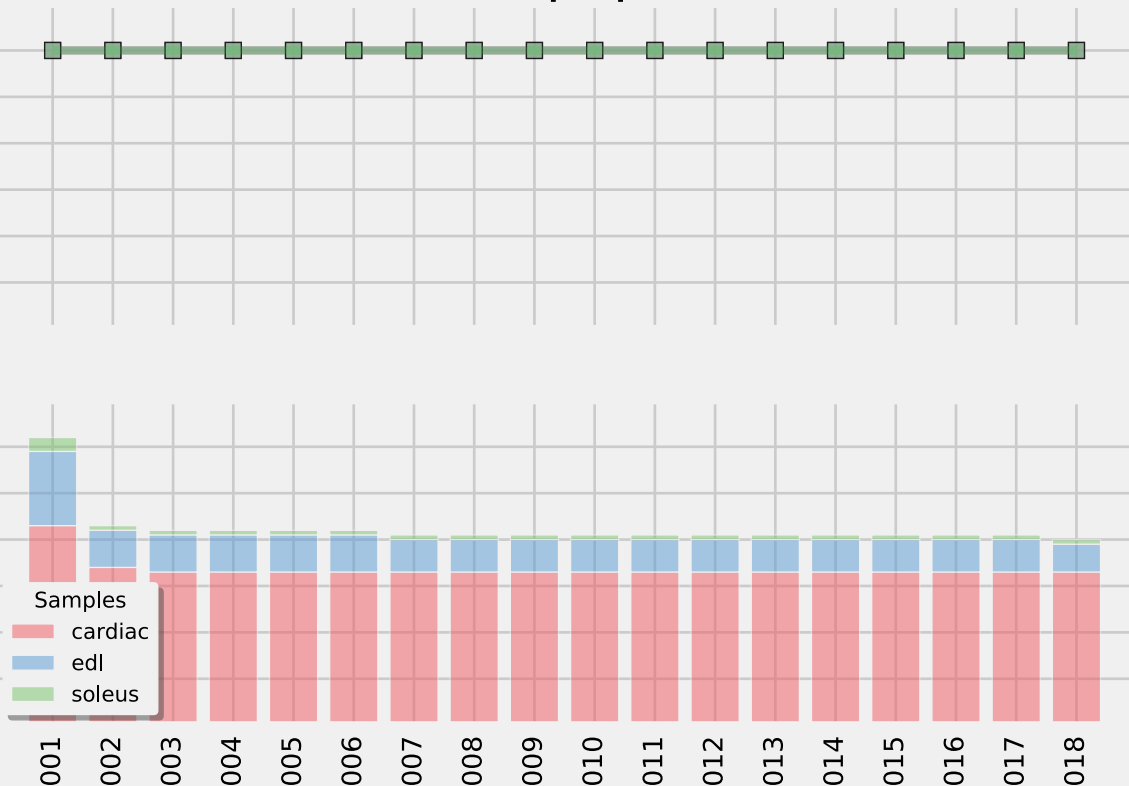



# Lpgat1

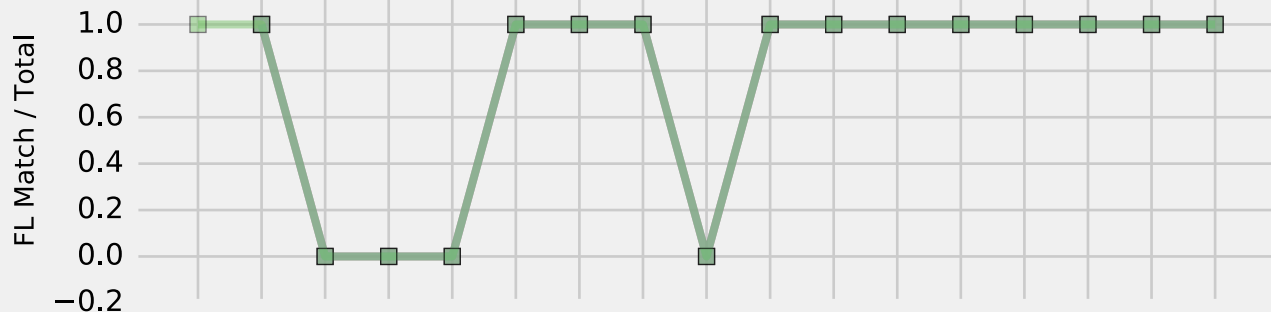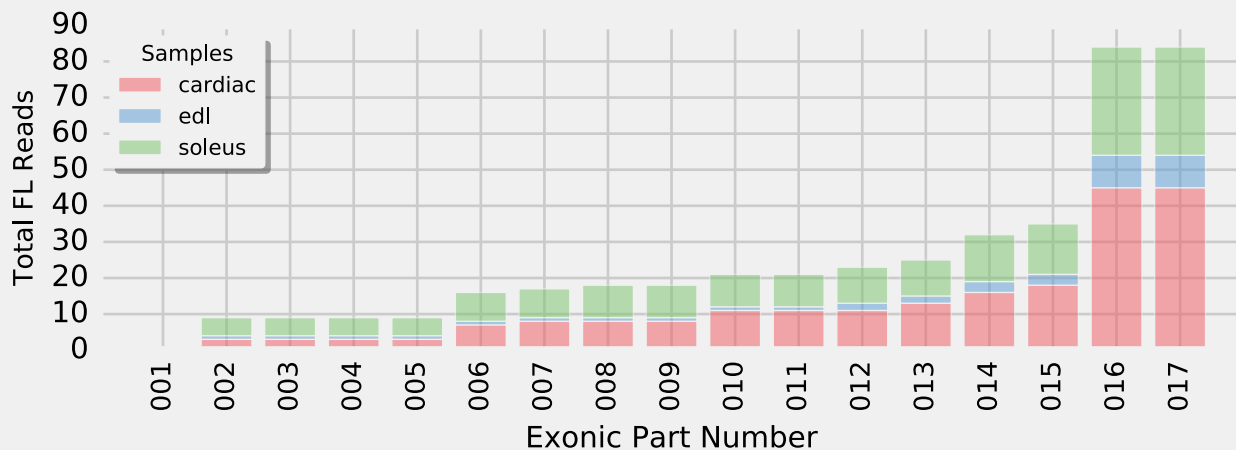

# Lpin1

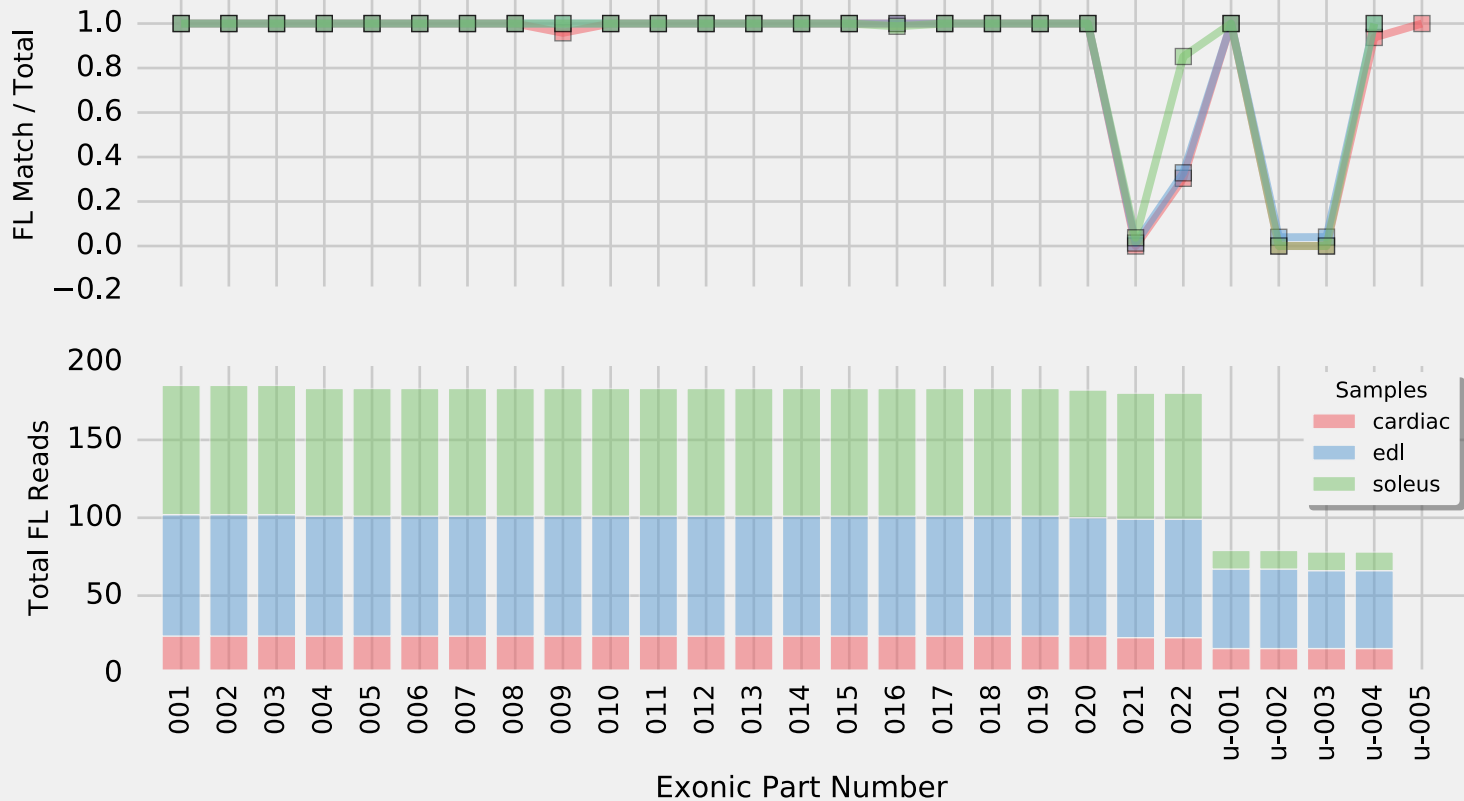

# Lpp

FL Match / Total

1.0  
0.8  
0.6  
0.4  
0.2  
0.0  
-0.2

Total FL Reads

80  
70  
60  
50  
40  
30  
20  
10  
0

Samples  
cardiac  
edl  
soleus

Exonic Part Number

001

002

003

004

005

006

007

008

009

010

011

012

013

014

015

016

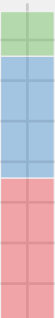

# Lrch3

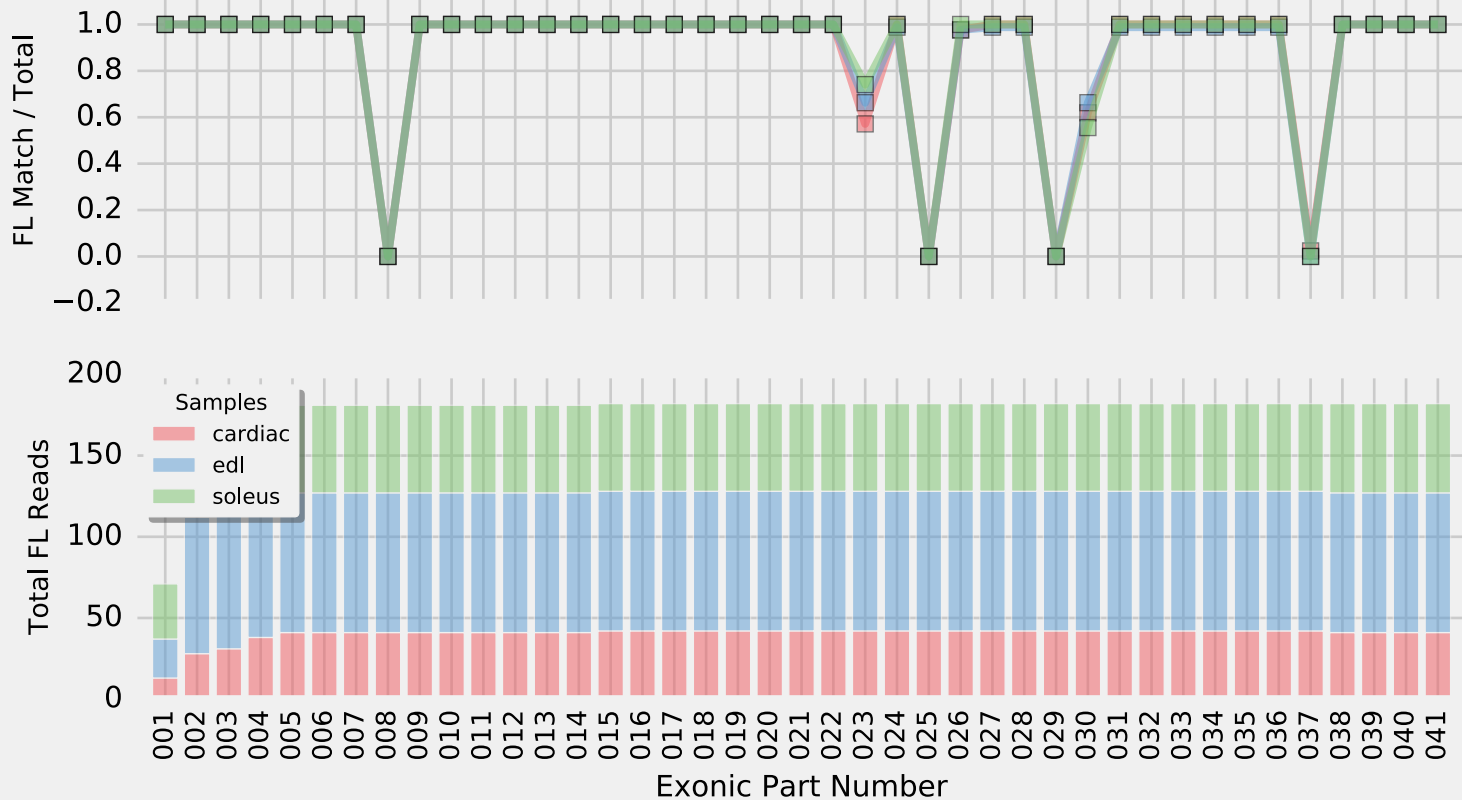

# Lrp1

FL Match / Total

1.0  
0.8  
0.6  
0.4  
0.2  
0.0  
-0.2

Total FL Reads

60  
50  
40  
30  
20  
10  
0

Samples

cardiac  
edl  
soleus

Exonic Part Number

001 002 003 004 005 006 007 008 009 010 011 012 013 014 015 016 017 018 019 020 021 022 023 024 025 026 027 028 029 030 031 032 033 034 035 036 037 038 039 040 041 042 043 044 045 046 047 048 049 050 051 052 053 054 055 056 057 058 059 060 061 062 063 064 065 066 067 068 069 070 071 072 073 074 075 076 077 078 079 080 081 082 083 084 085 086 087 088 089 090 091 092 093 094 095 096 097 098 099 100 101 102 103 104 105 106 107 108 109 110 111

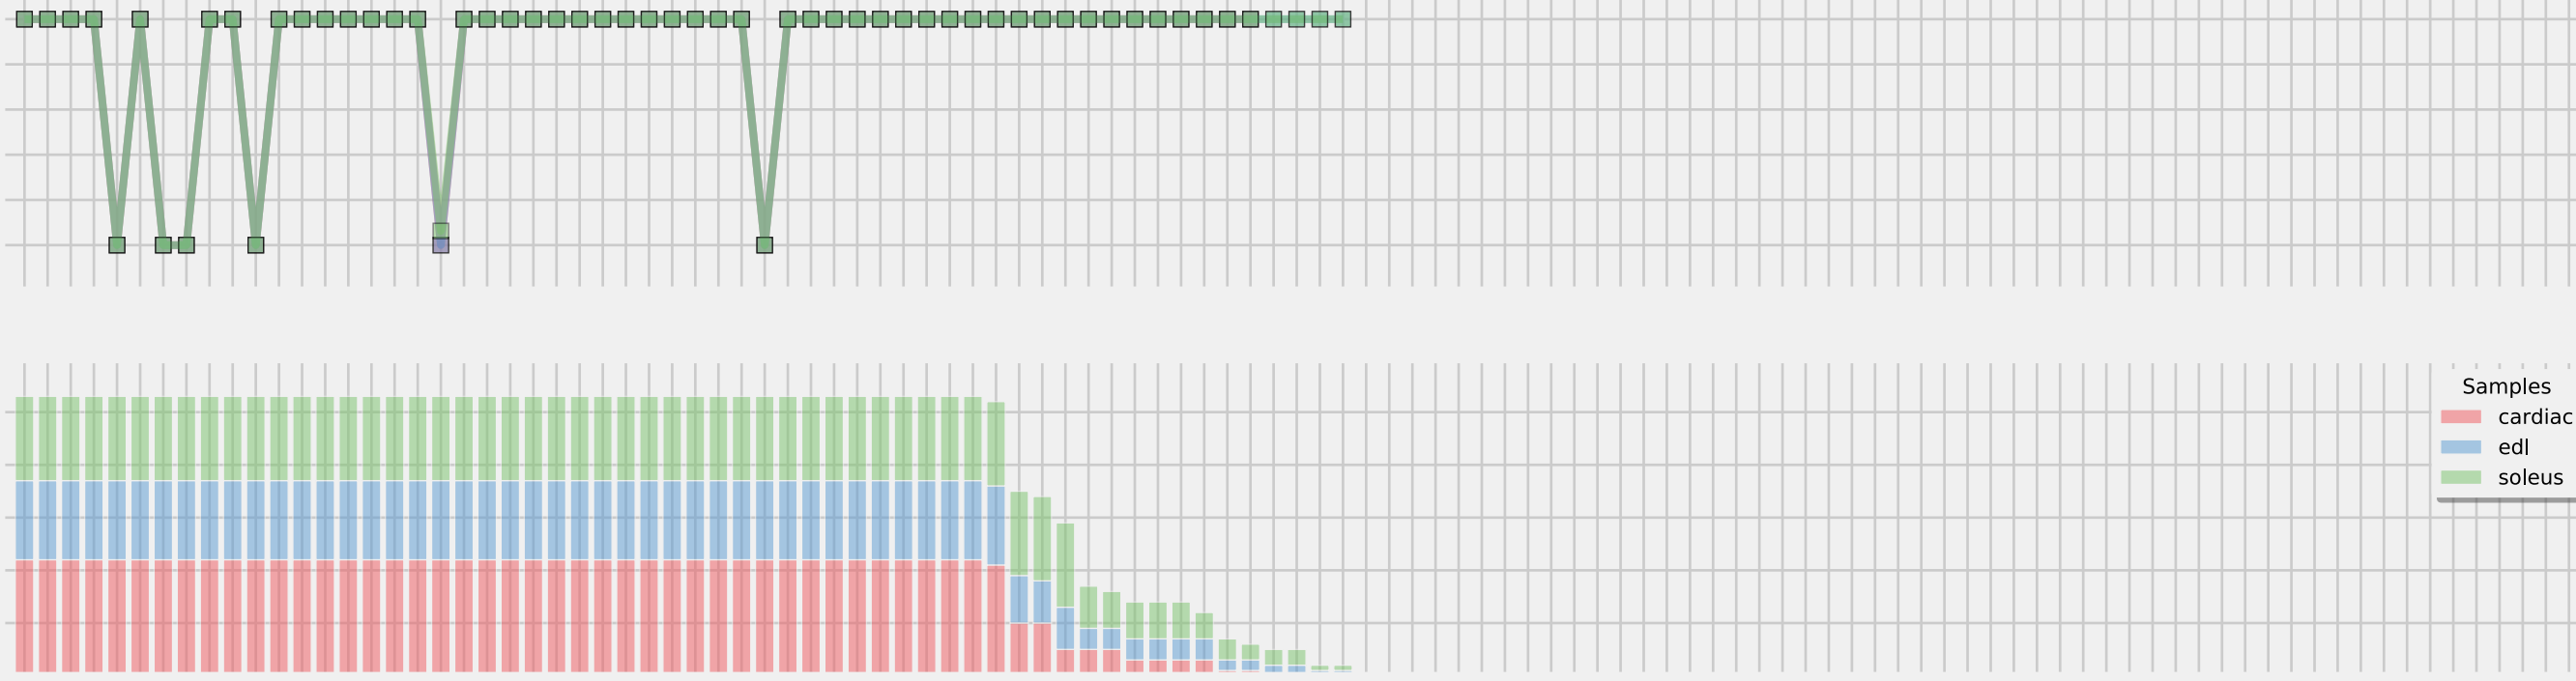

# Lrp6

FL Match / Total

1.0  
0.8  
0.6  
0.4  
0.2  
0.0  
-0.2

Total FL Reads

30  
25  
20  
15  
10  
5  
0

Samples  
cardiac  
edl  
soleus

Exonic Part Number

001 002 003 004 005 006 007 008 009 010 011 012 013 014 015 016 017 018 019 020 021 022 023 024 025 026 027 028 029 030 031 032 033 034

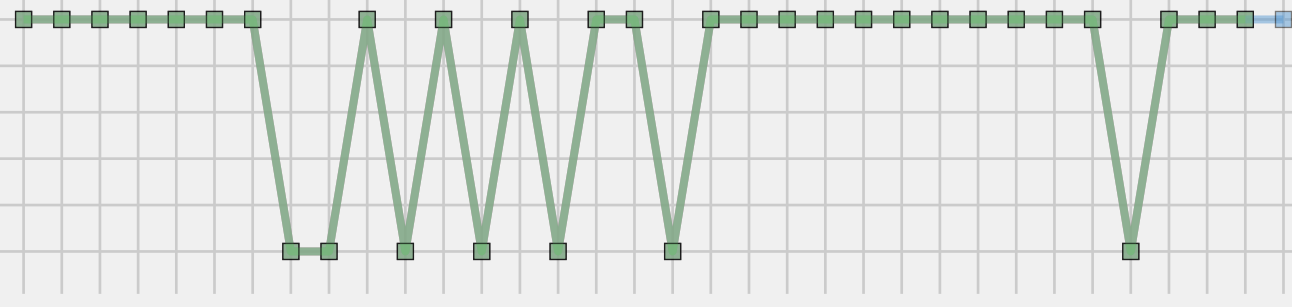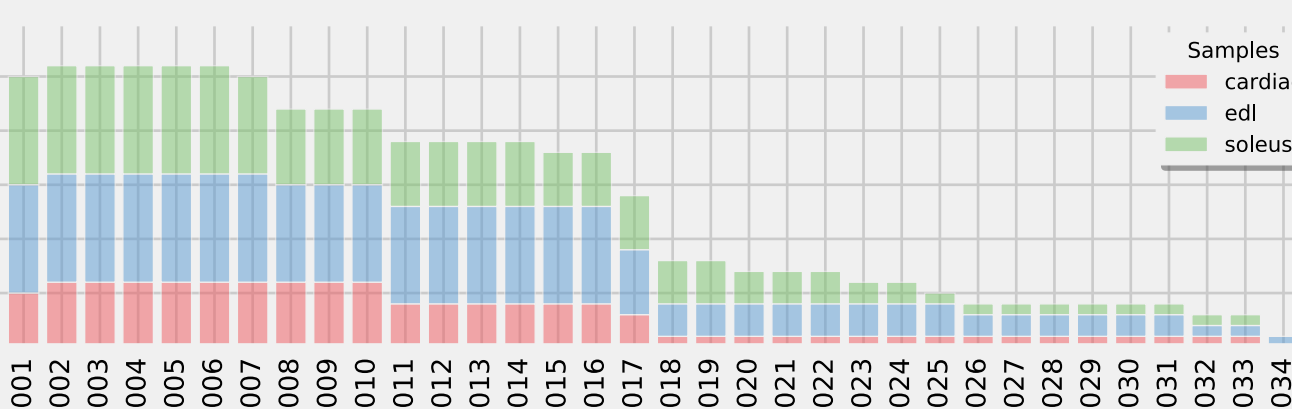

# Lrtm1

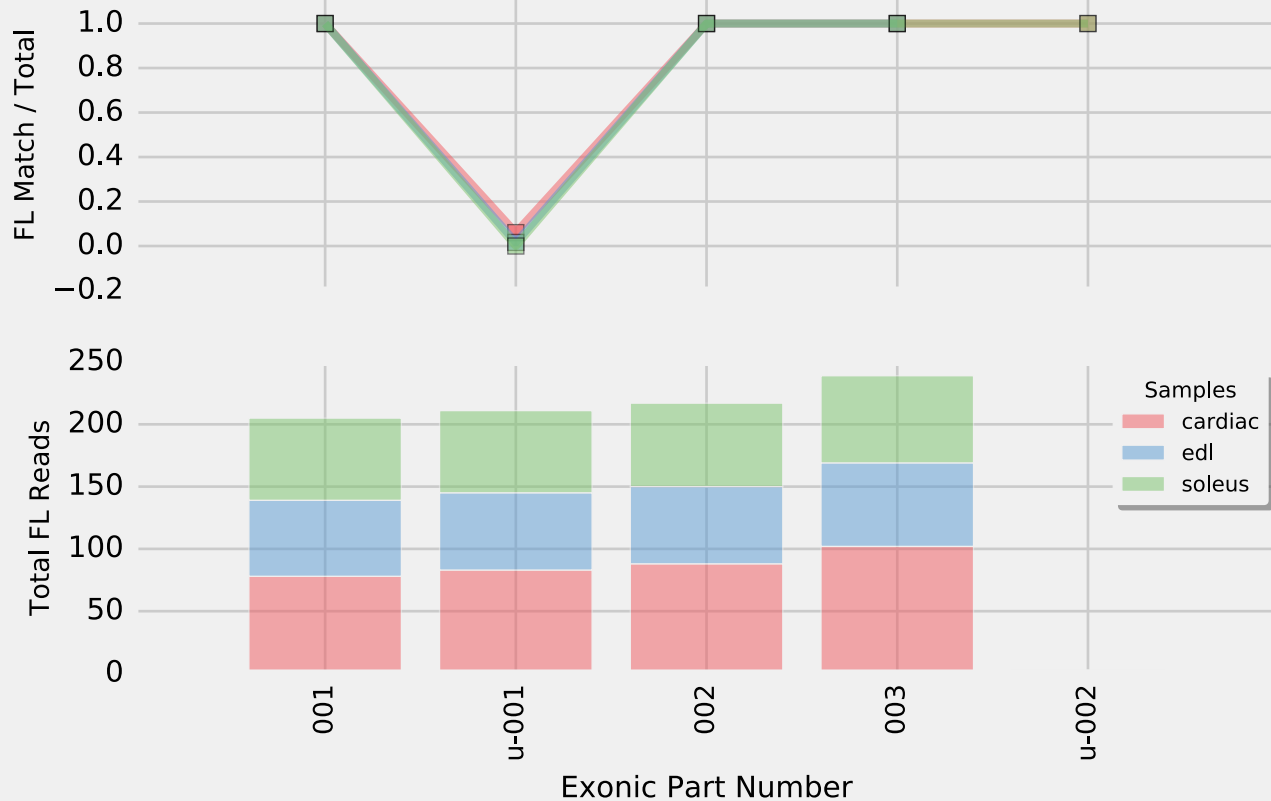

# Ltbp4

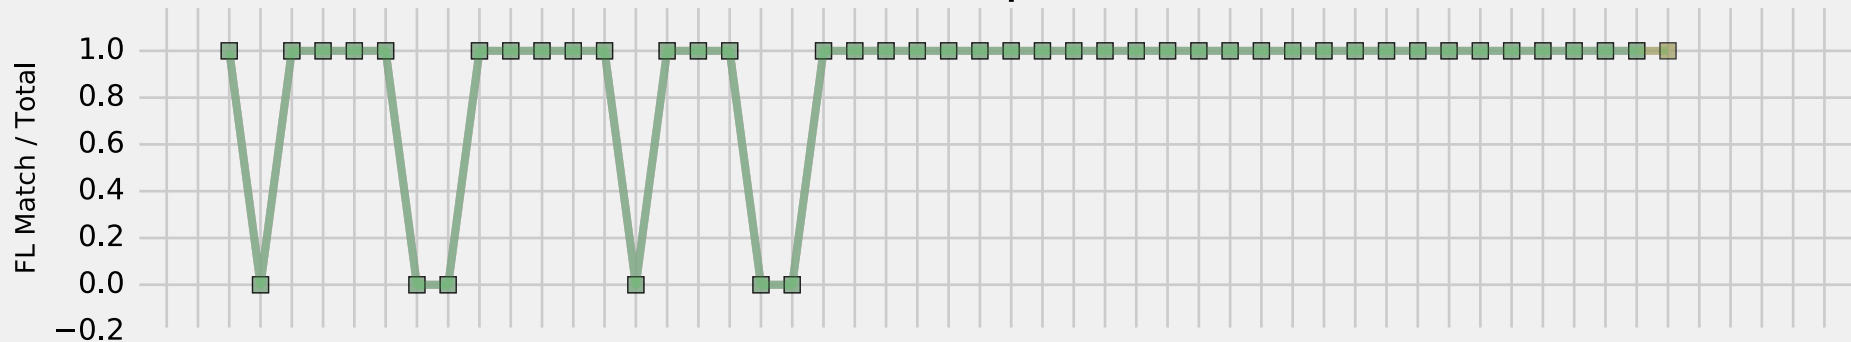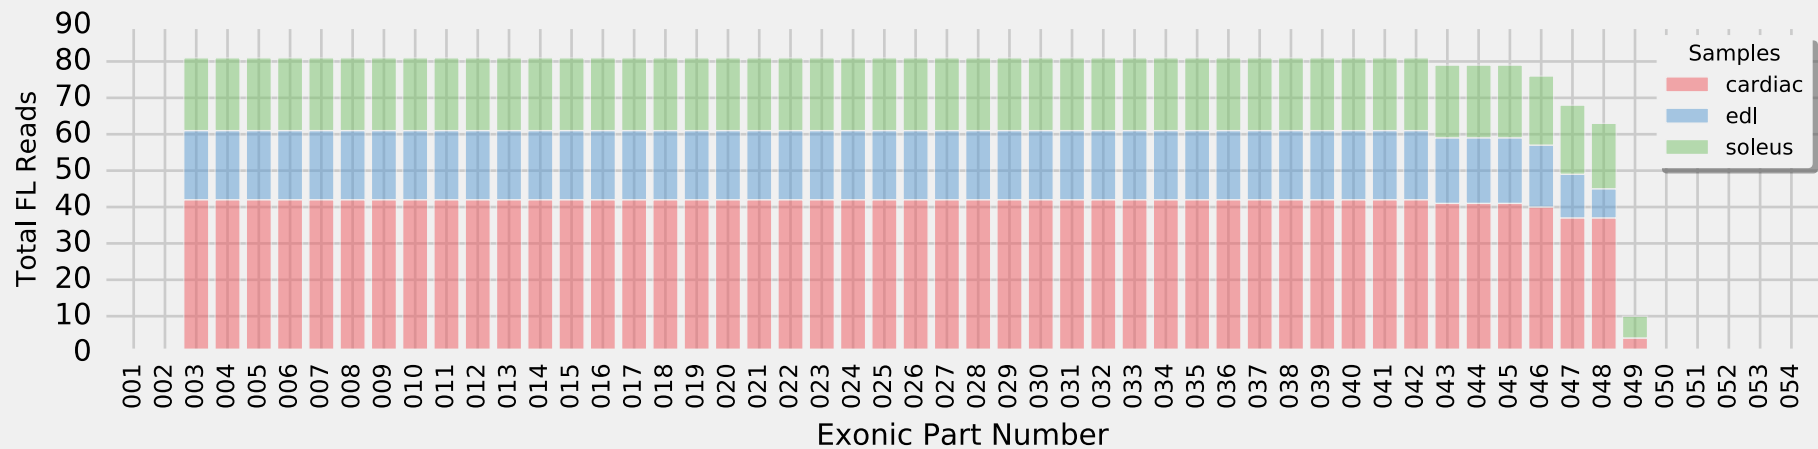



# Ltn1

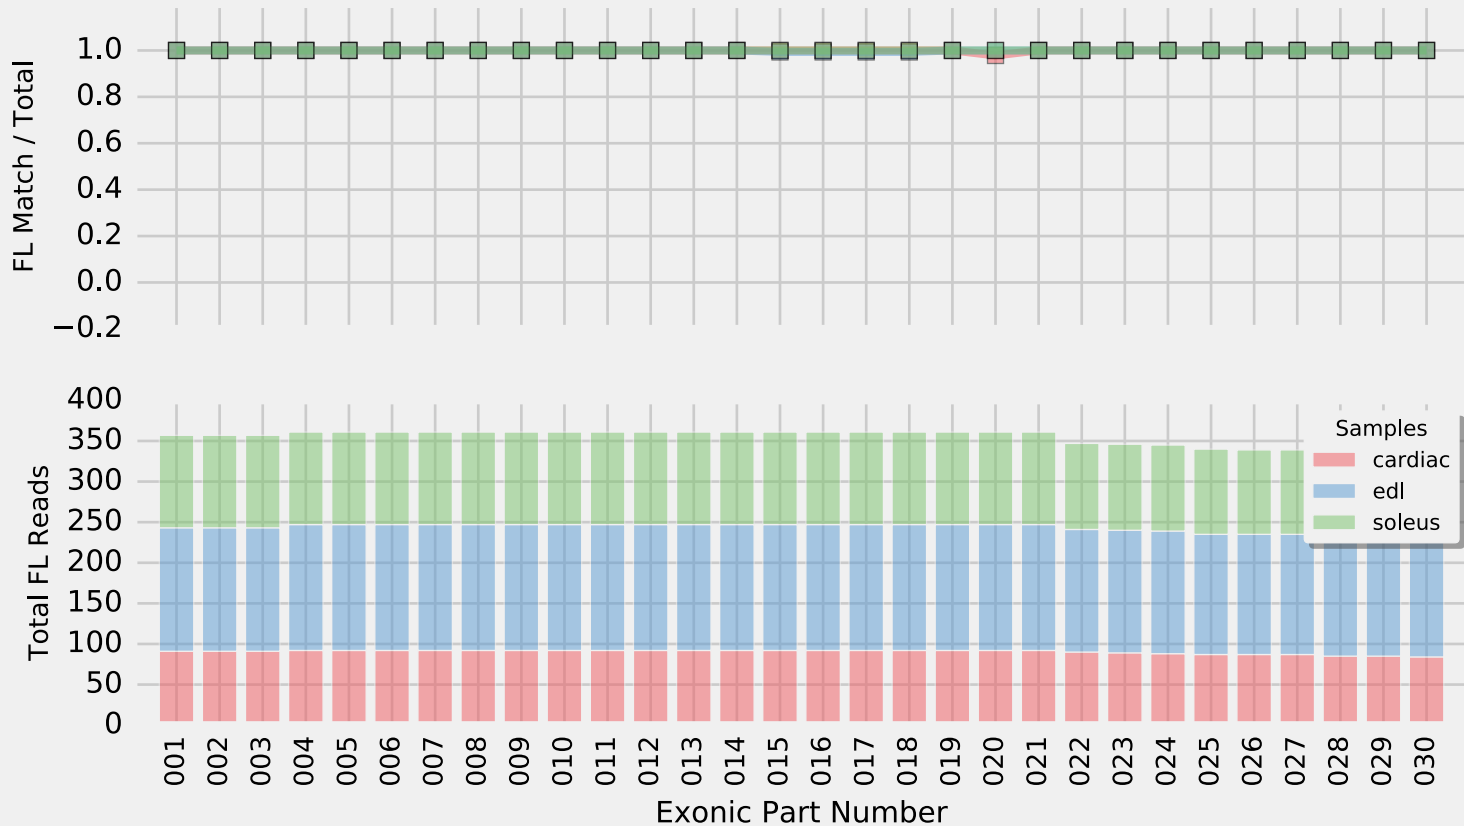

# Macf1

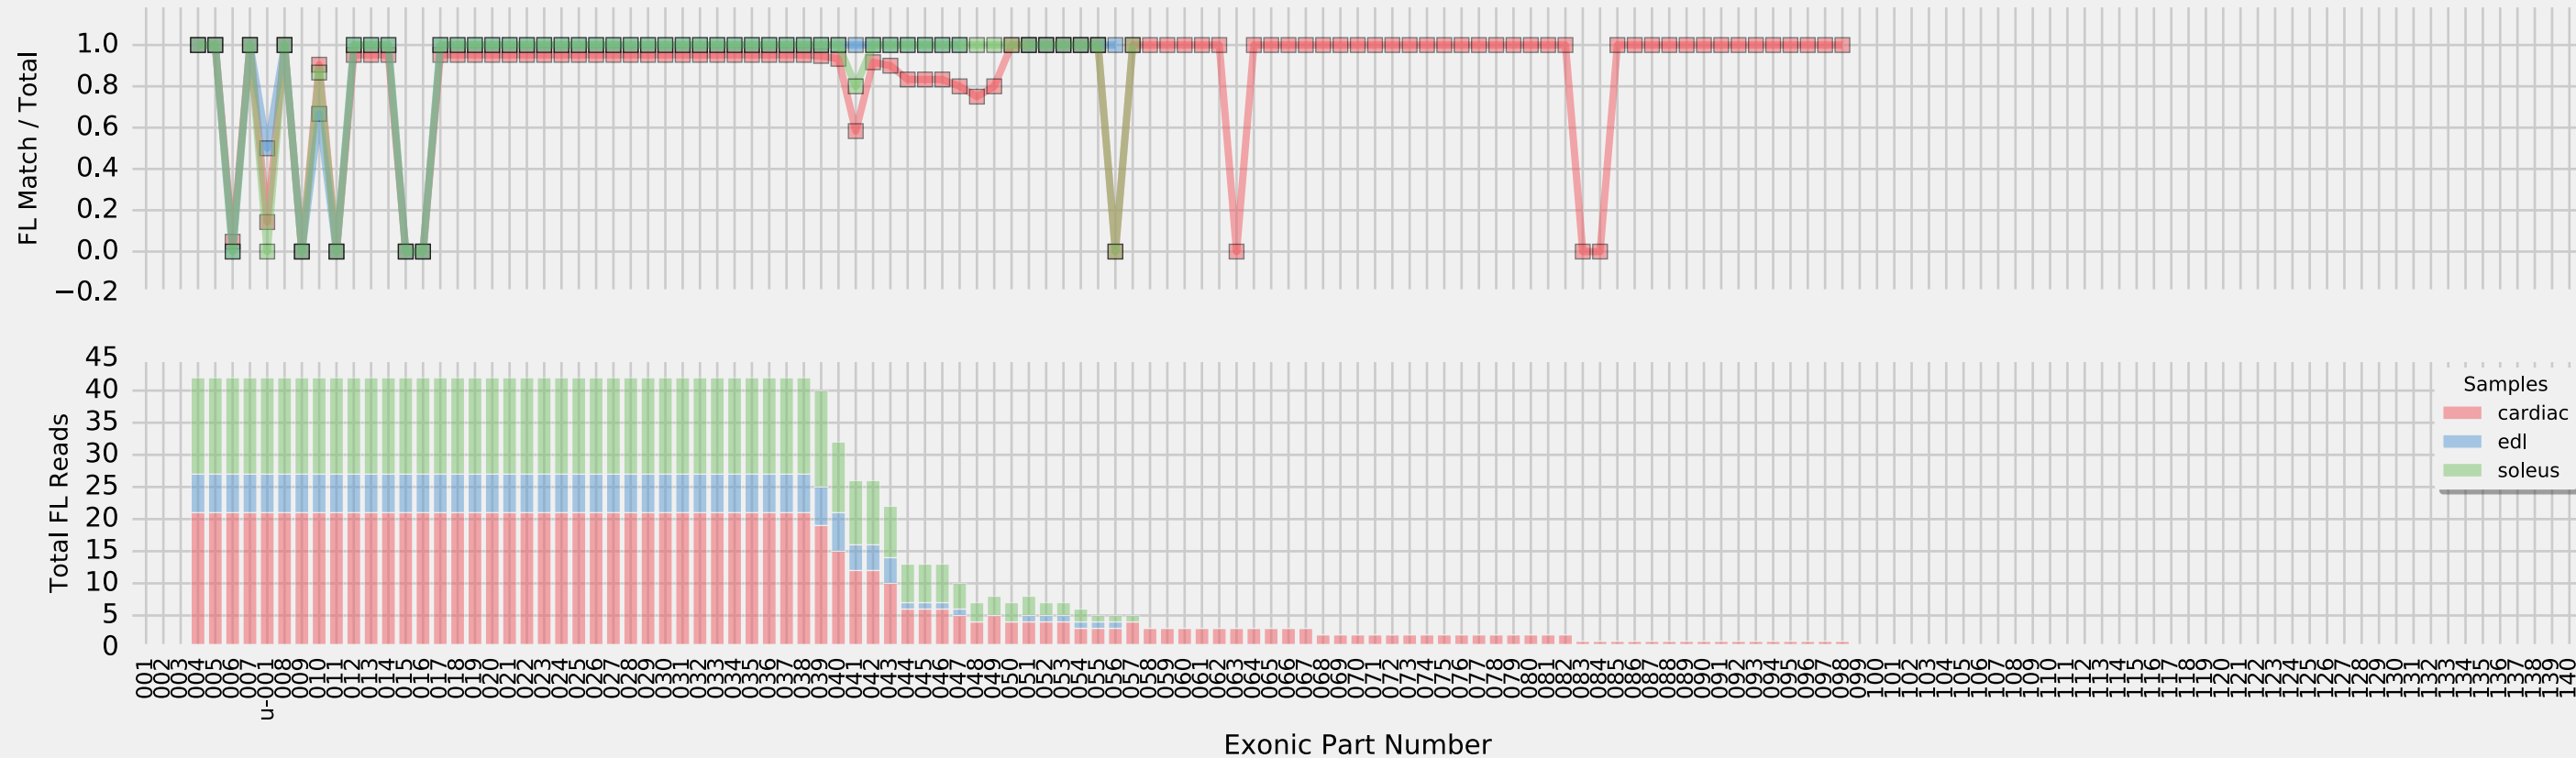

# Map3k4

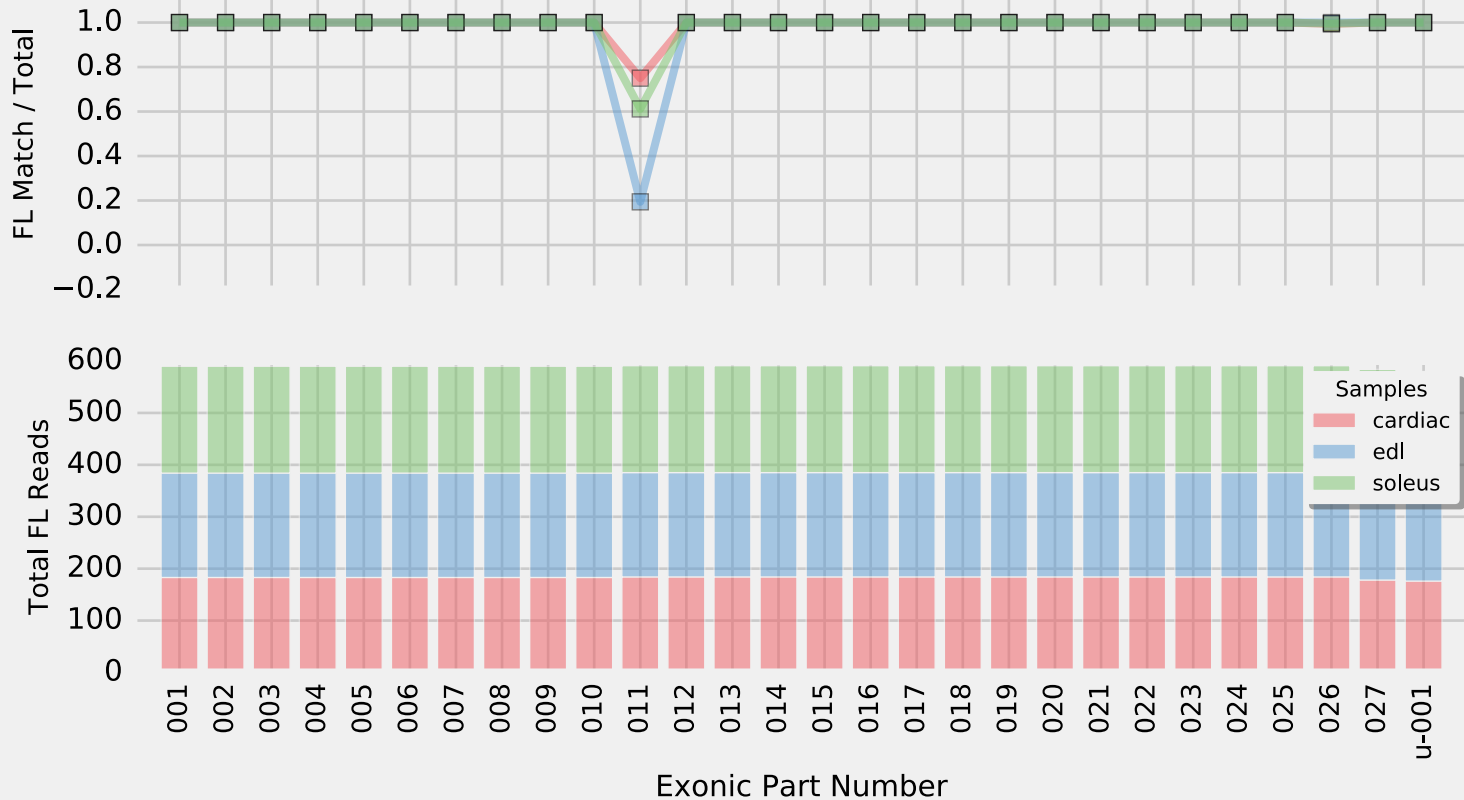

# Map4

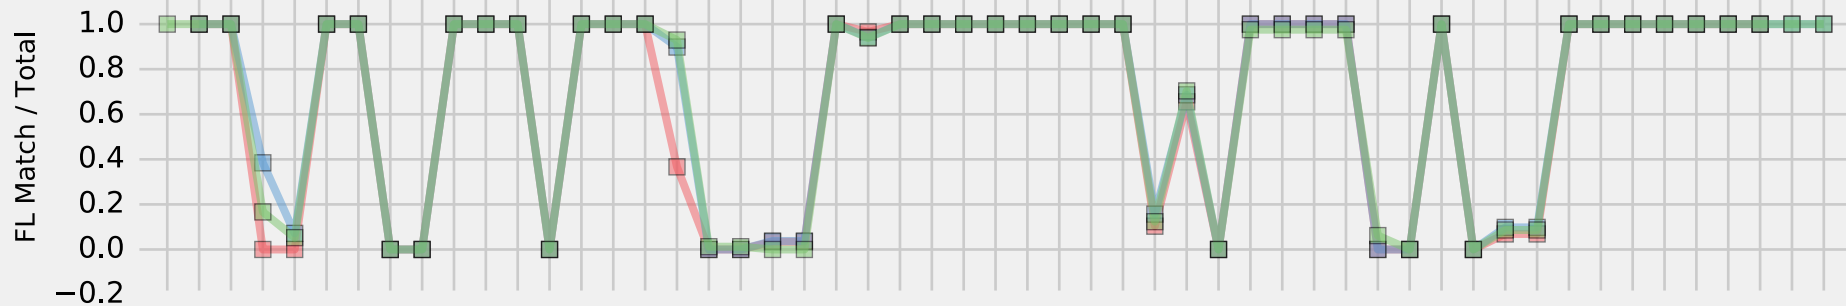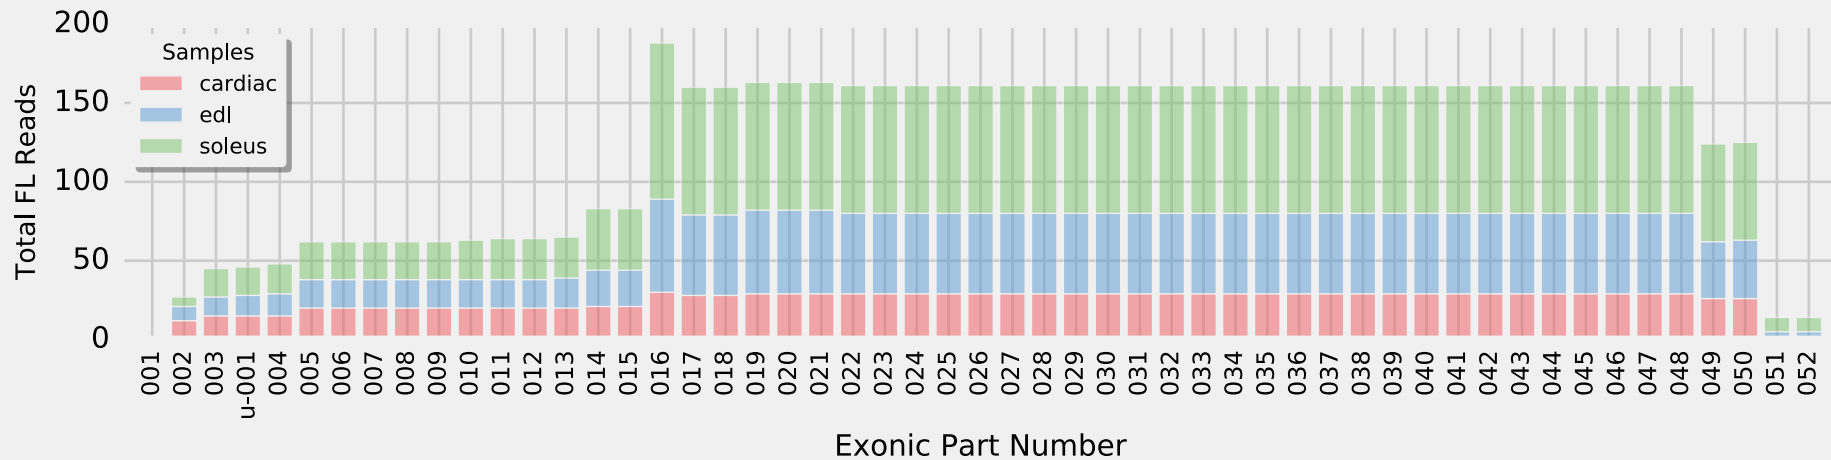

# Mapk8ip3

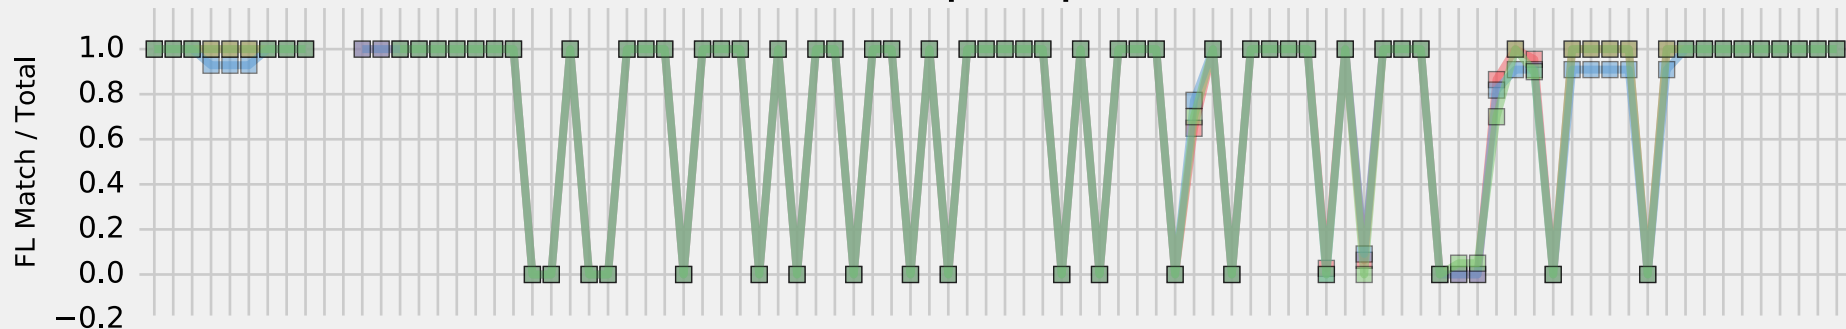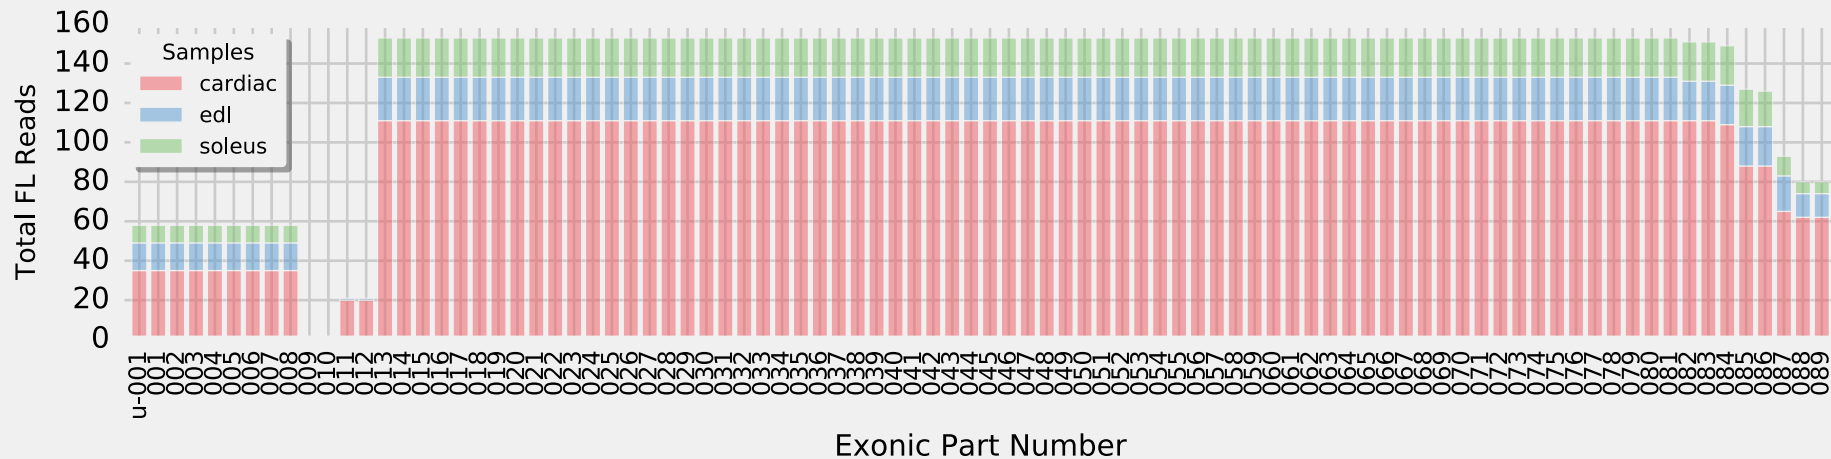

# March6

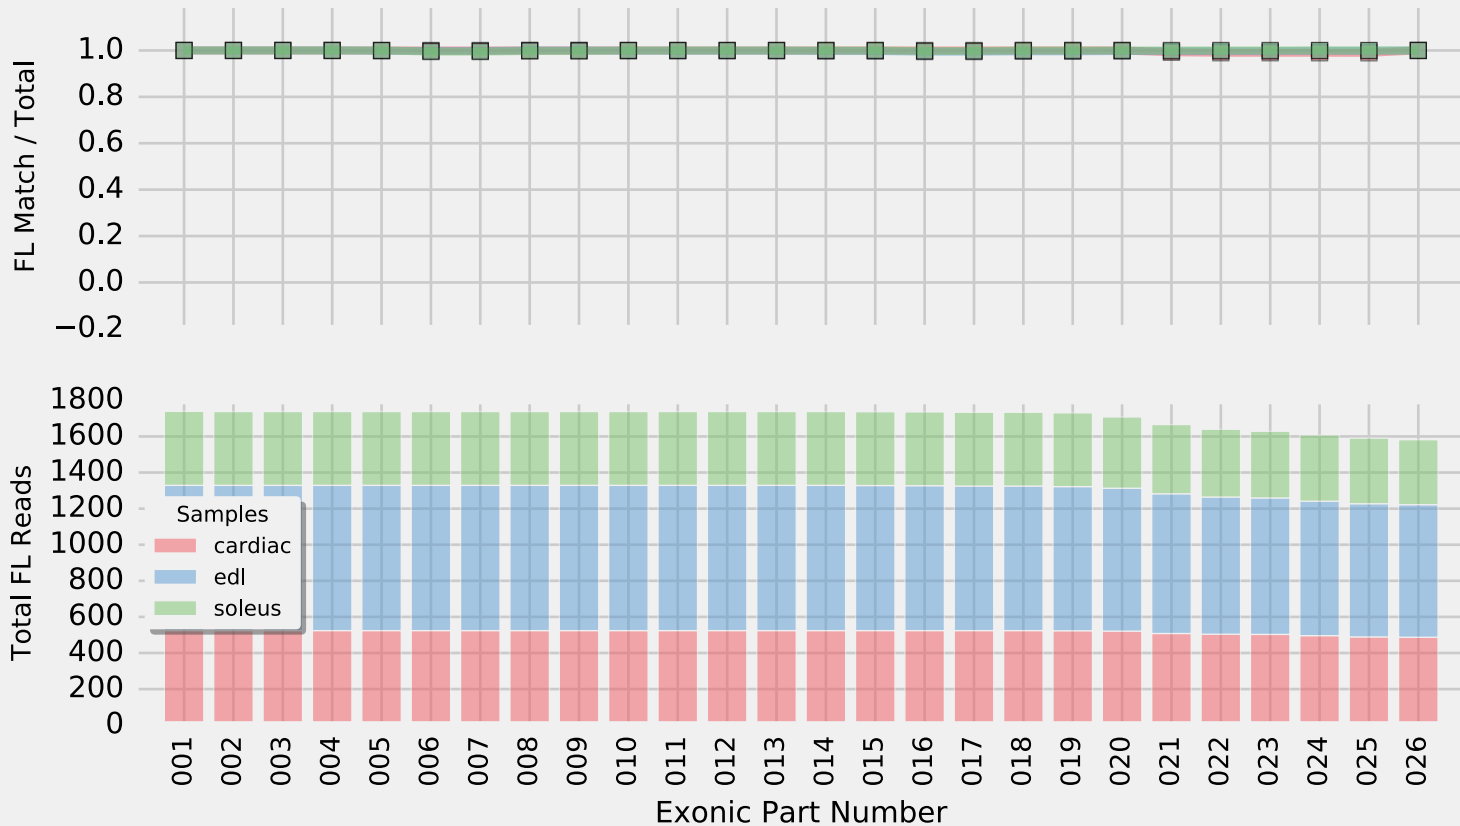

# Mast2

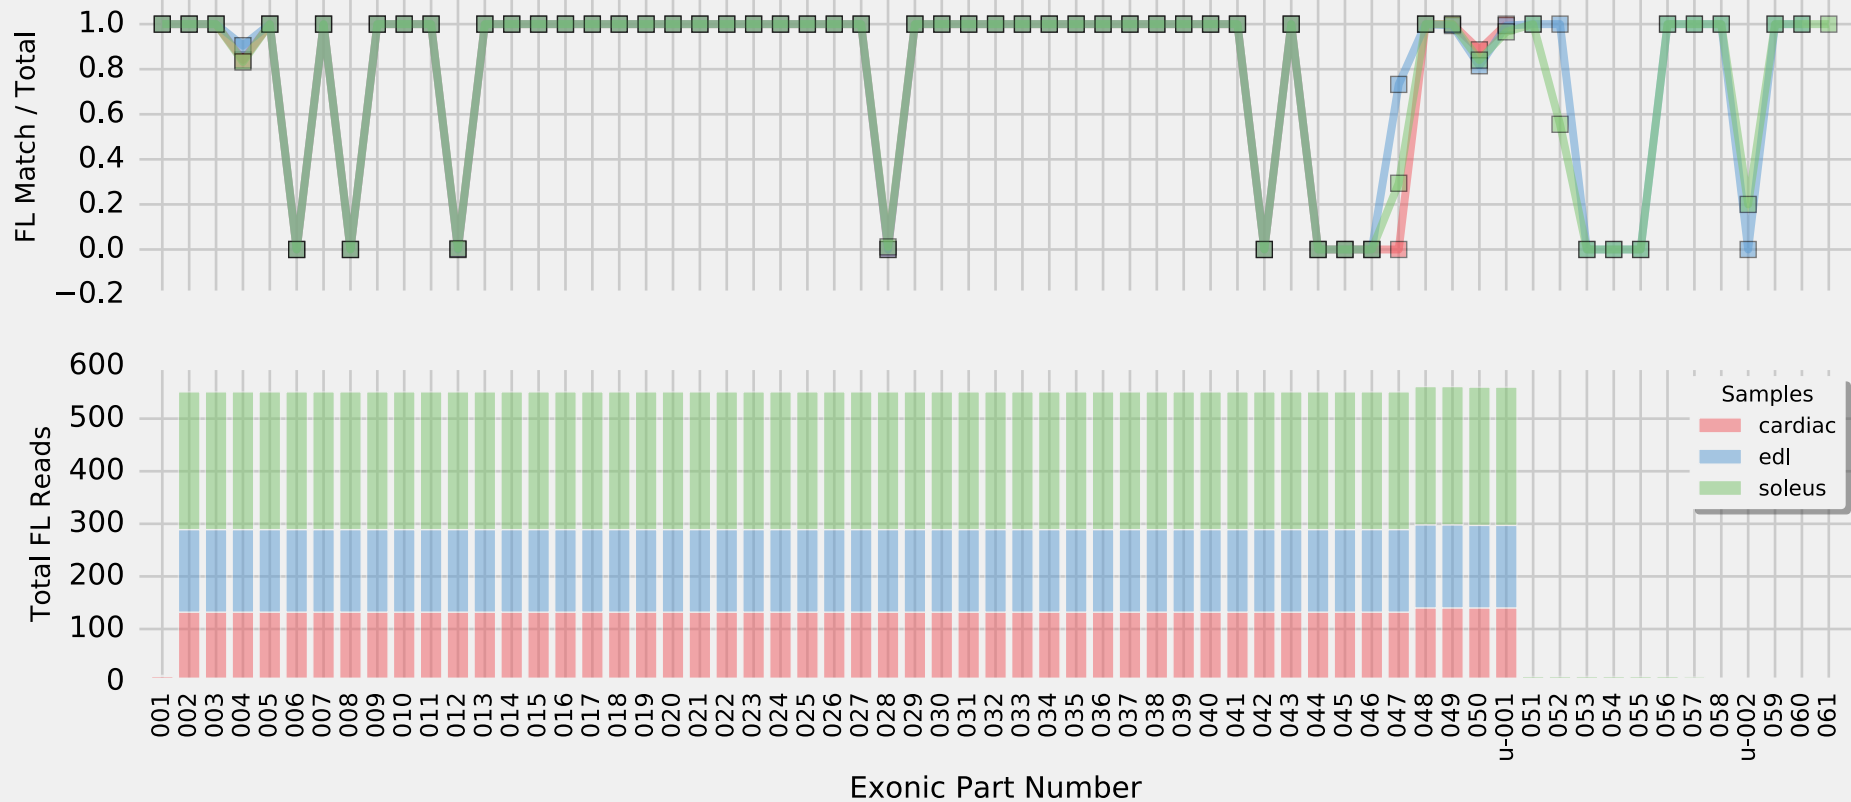

# Mbd1

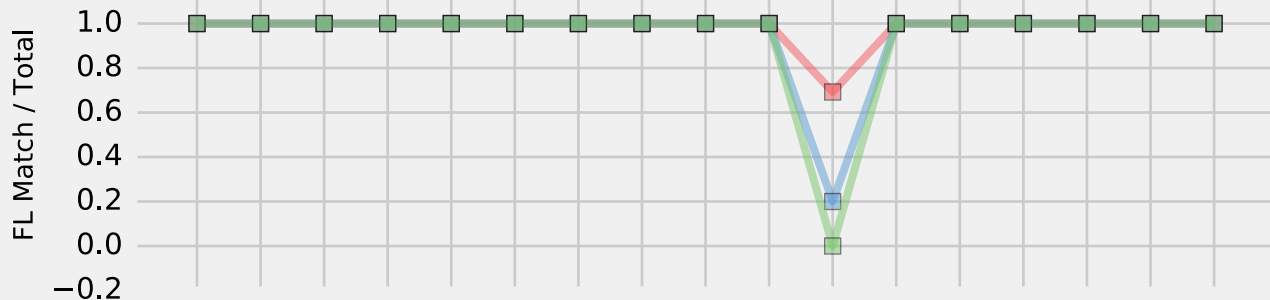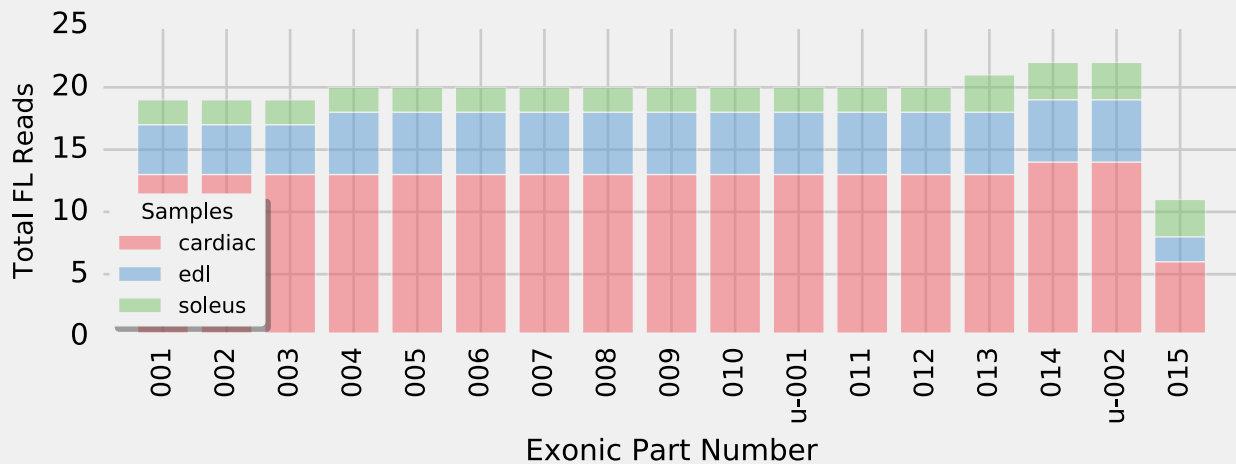



# Mbnl1

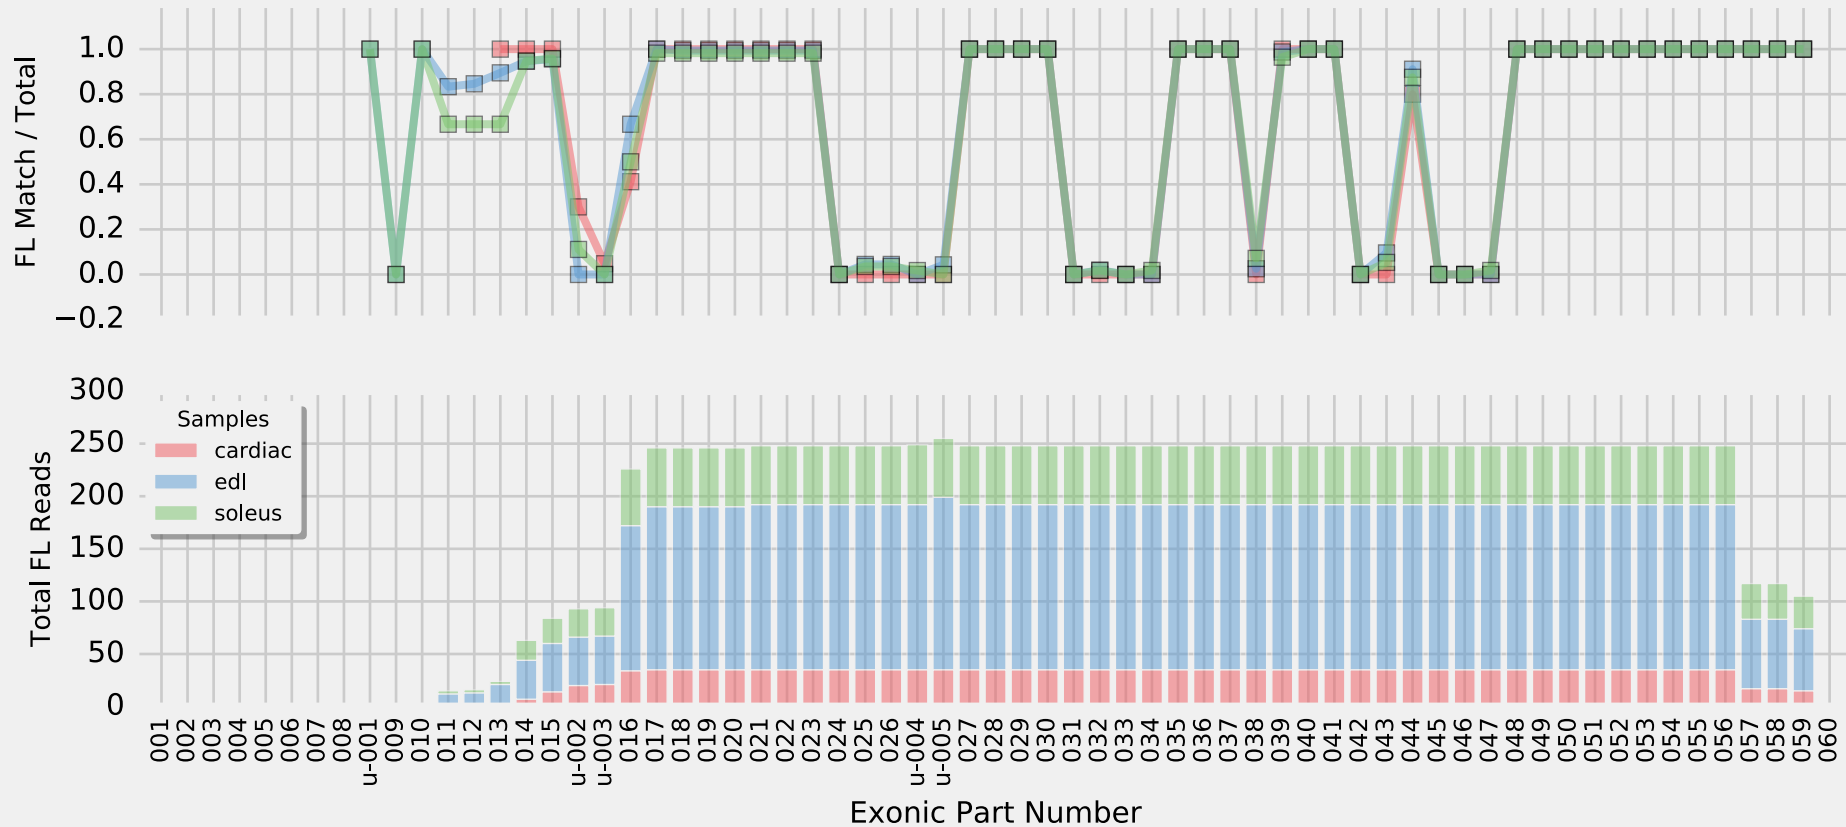

# Mcf2l

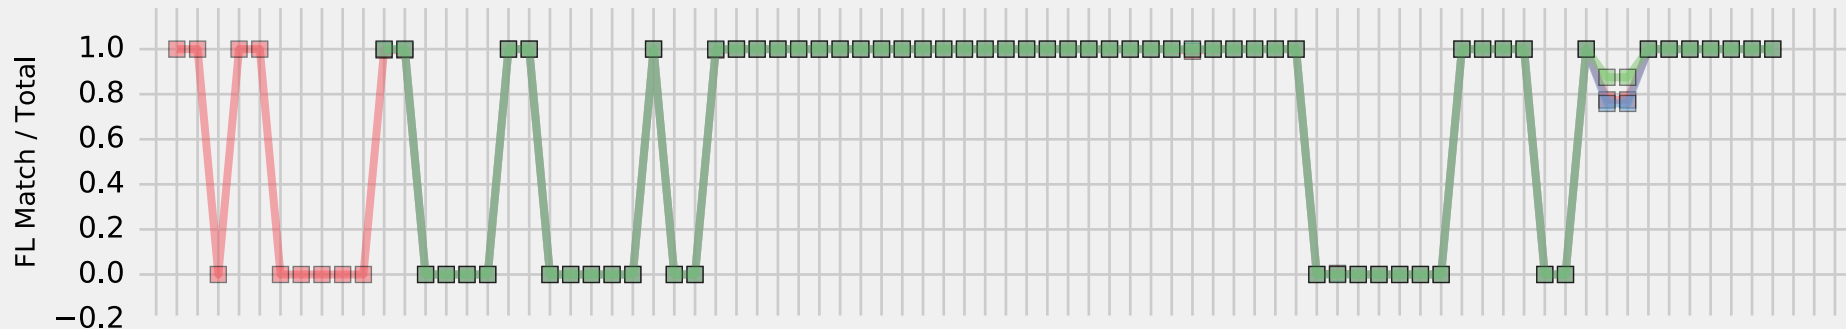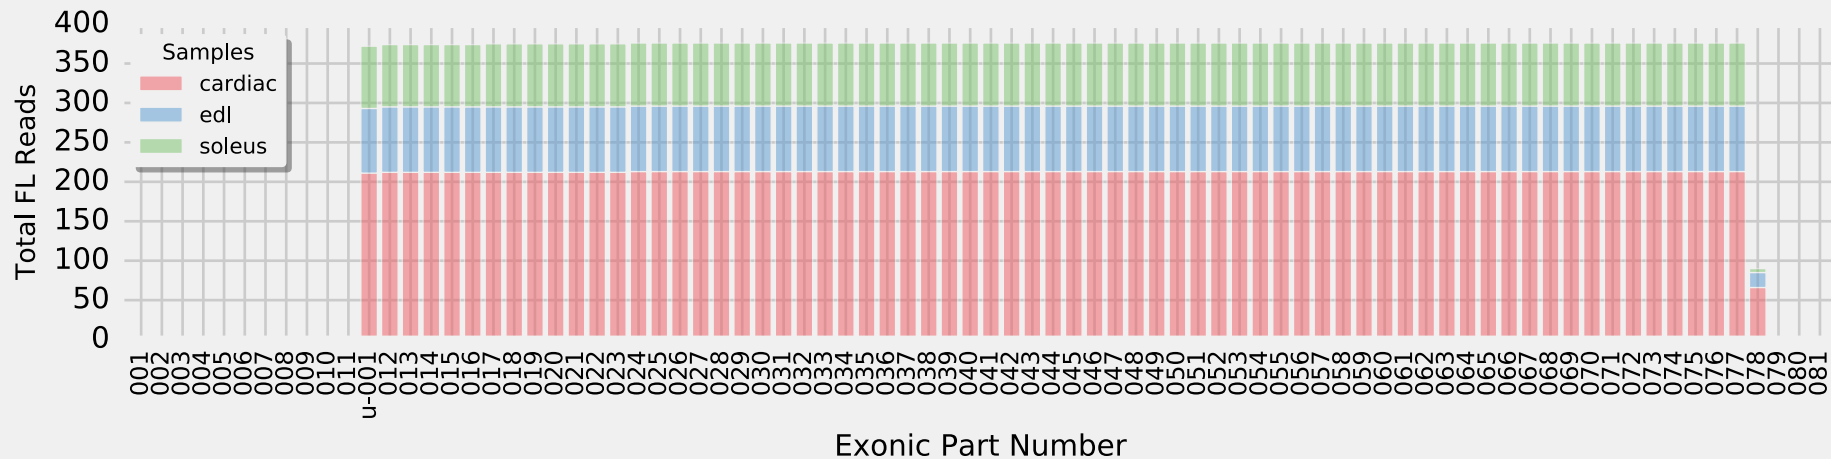

# Mcm3ap

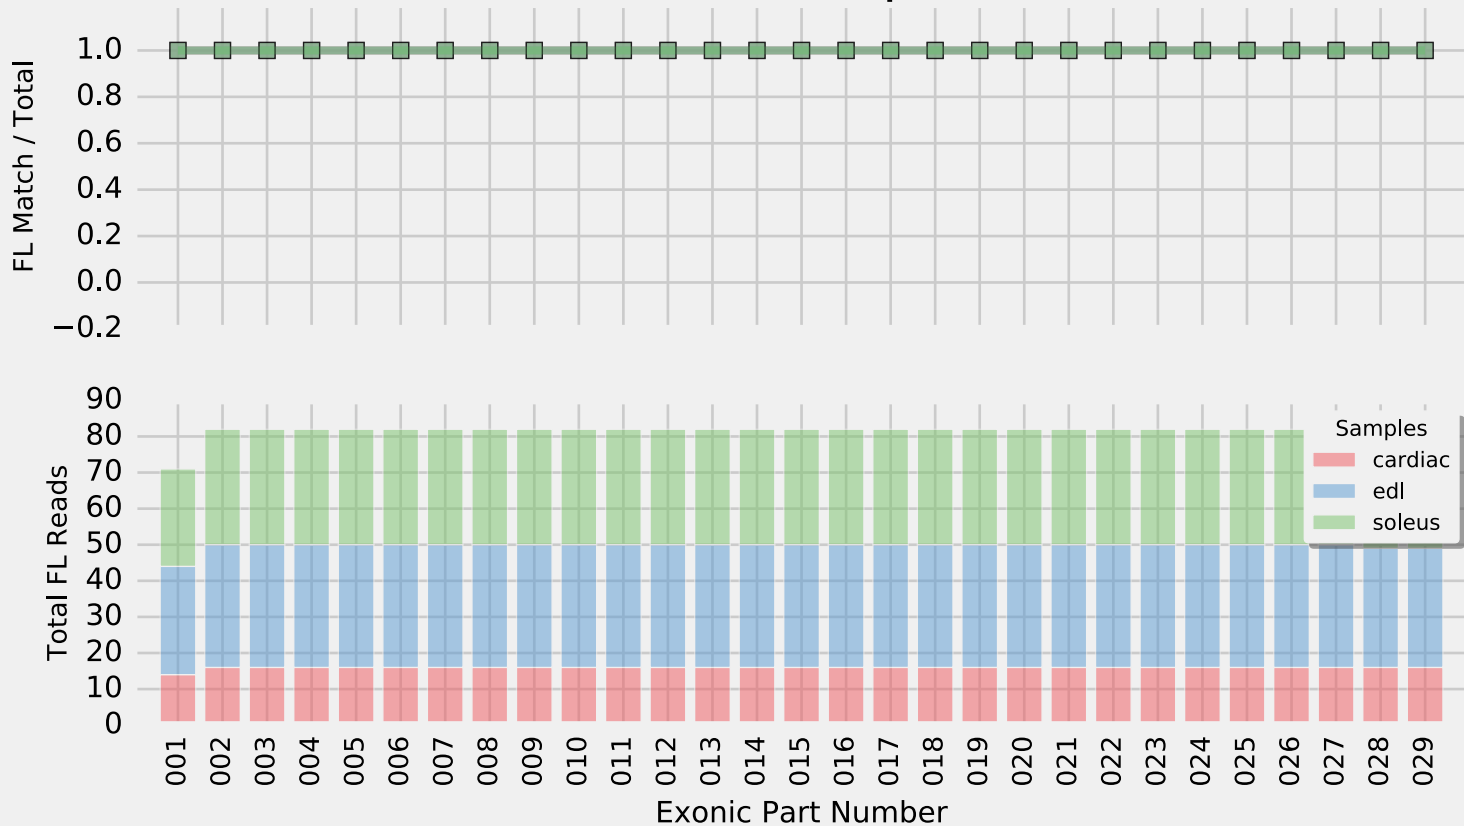

# Mdm4

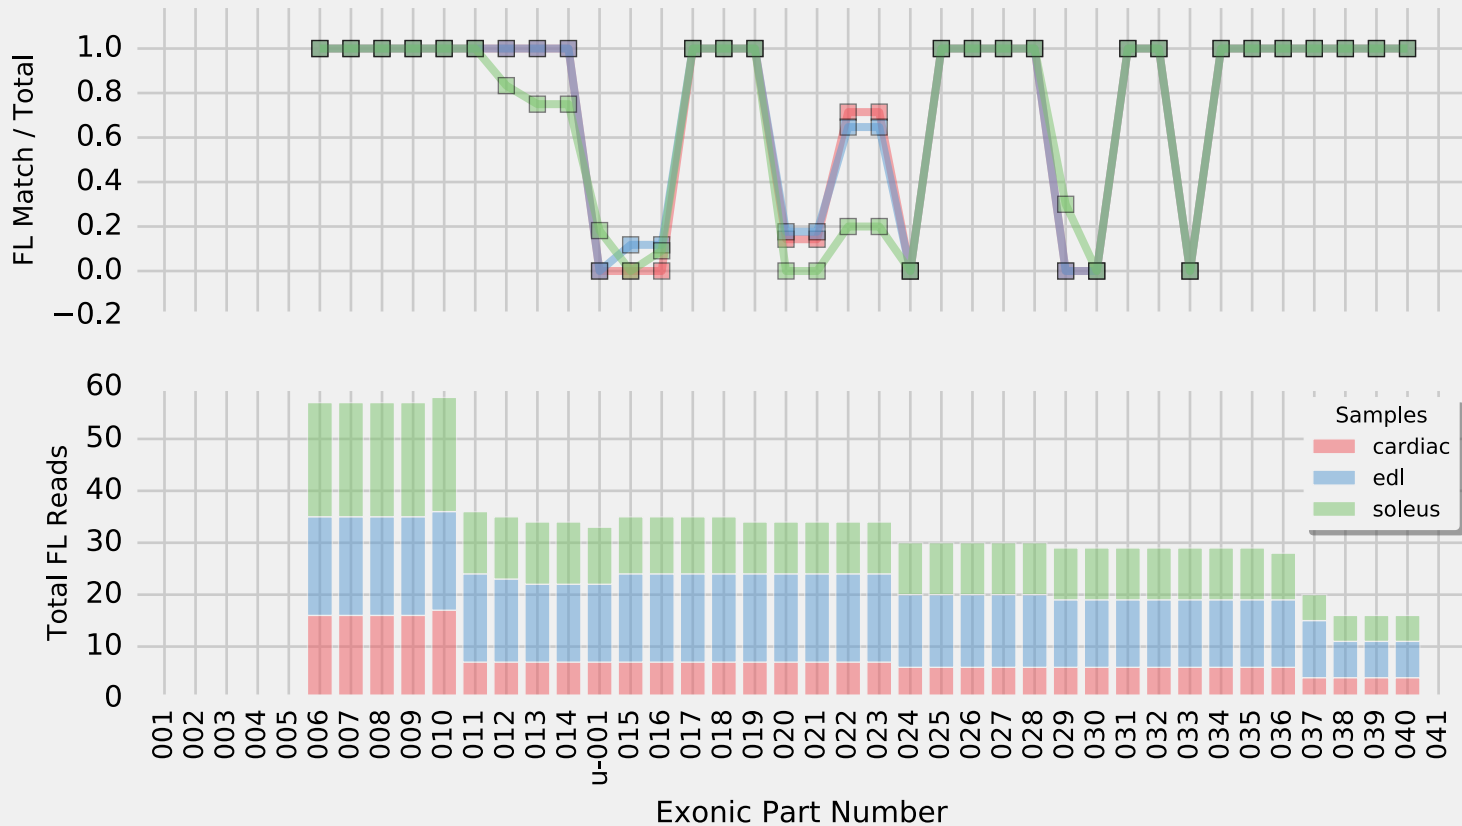

# Mef2a

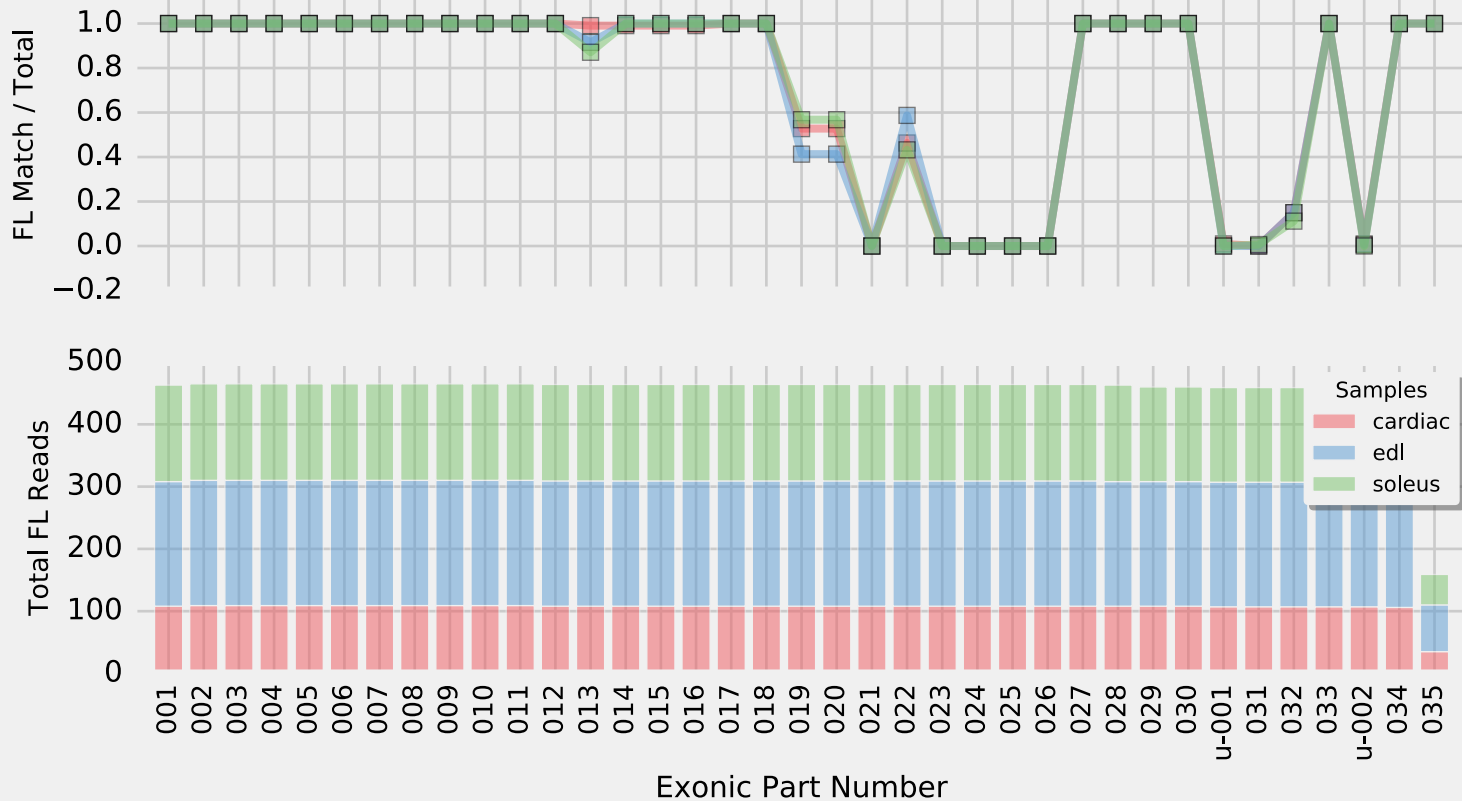

# Mef2c

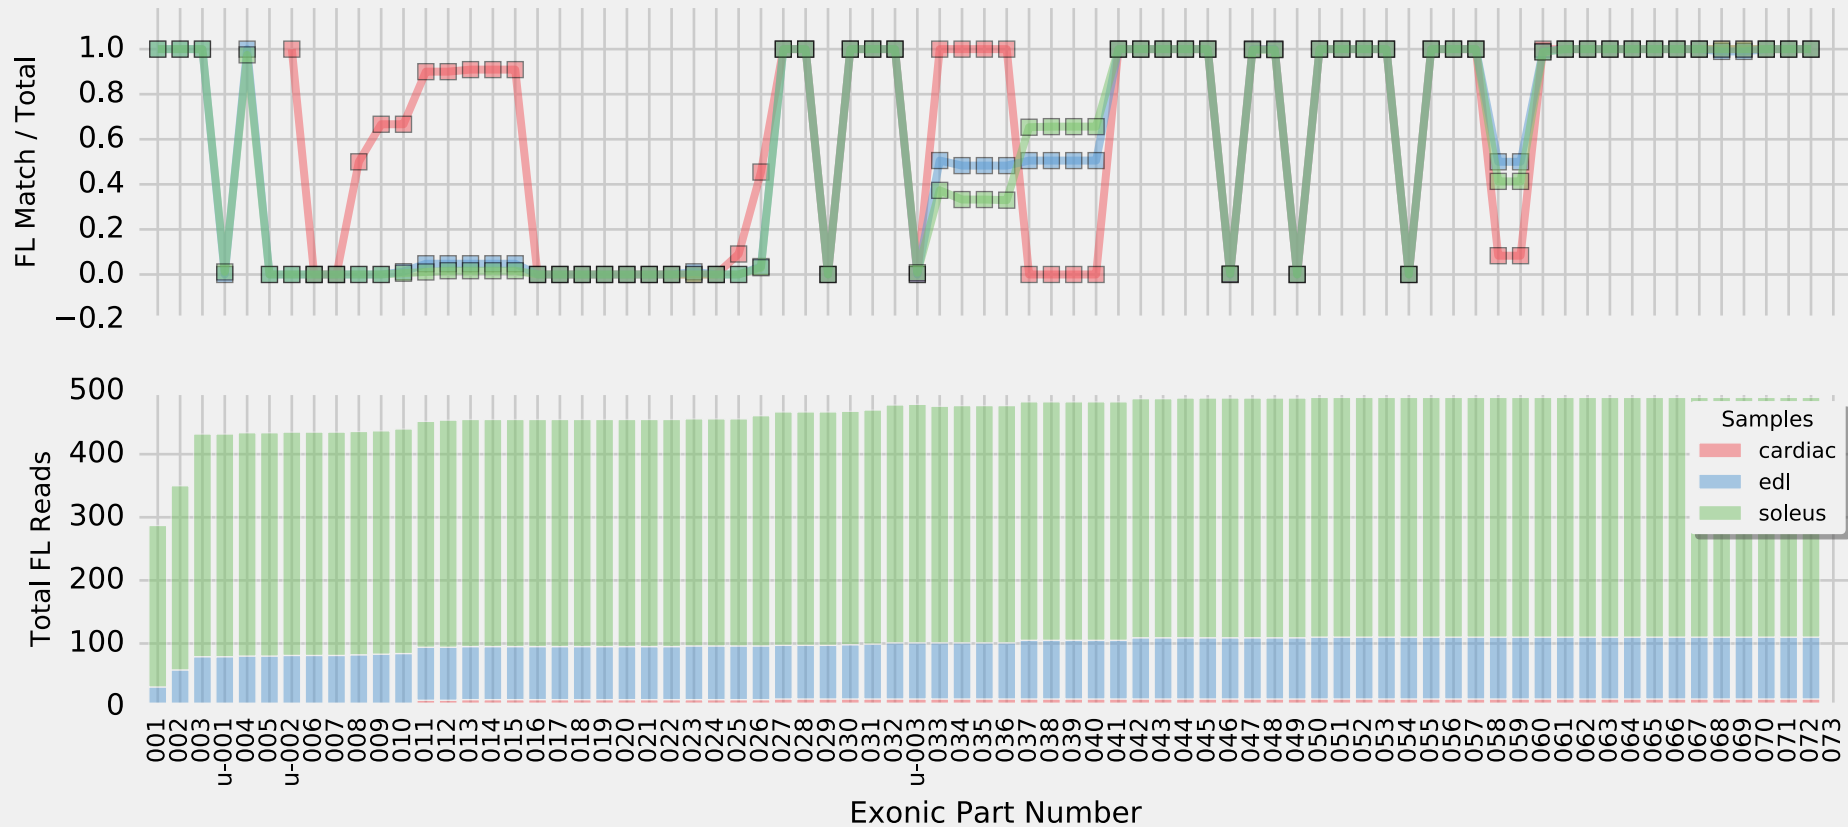

# Met

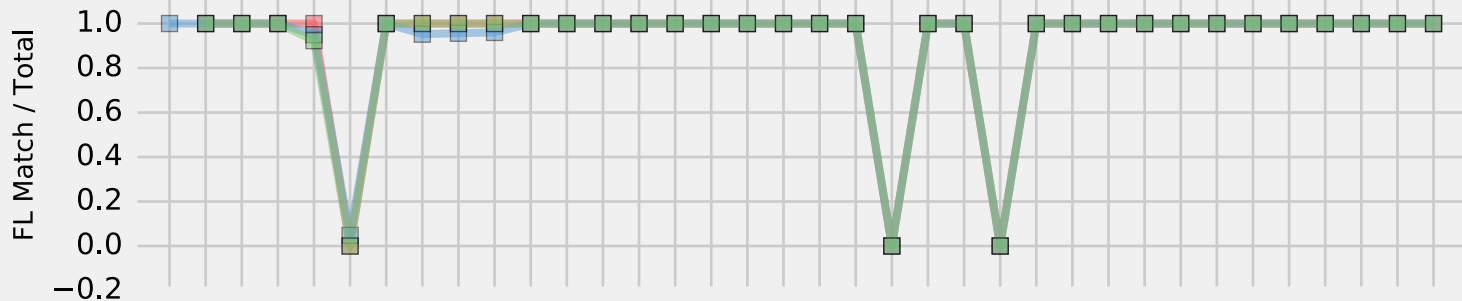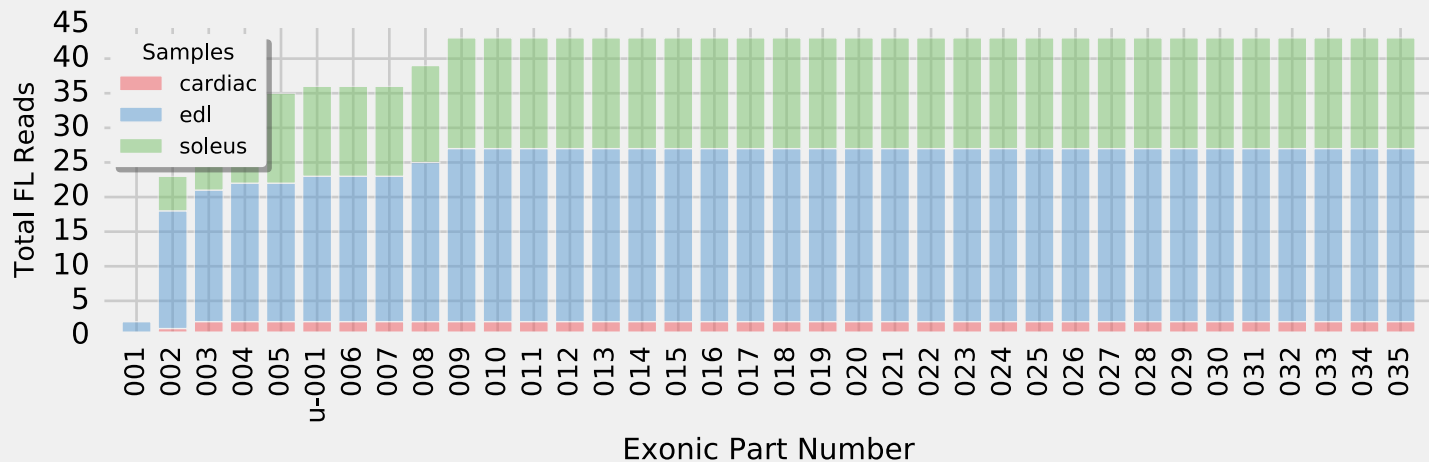

# Mettl4

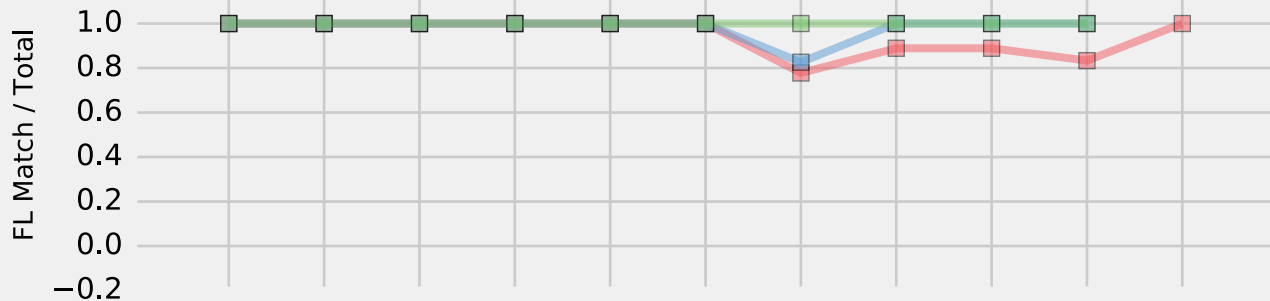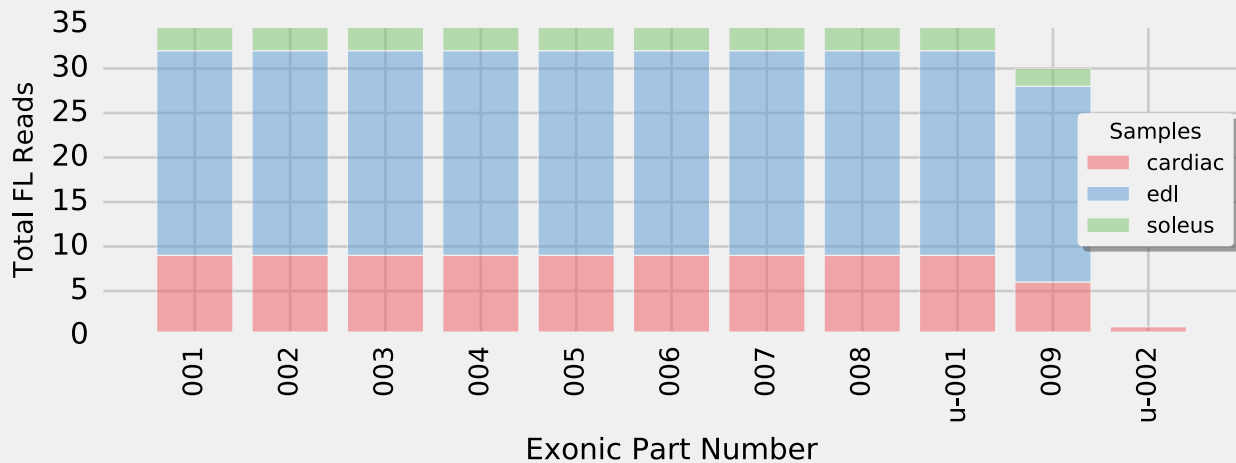



# Mfn2

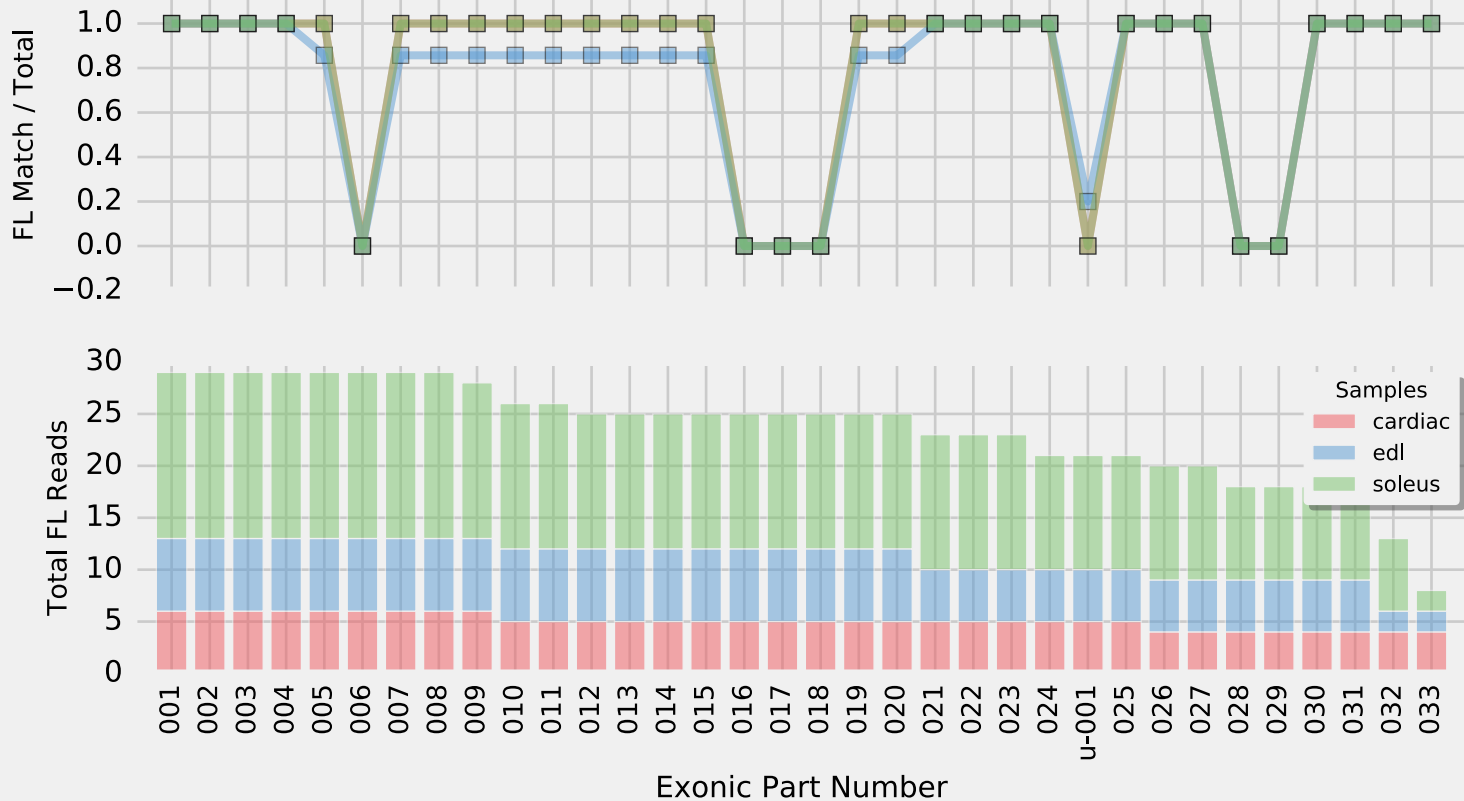

# Mia3

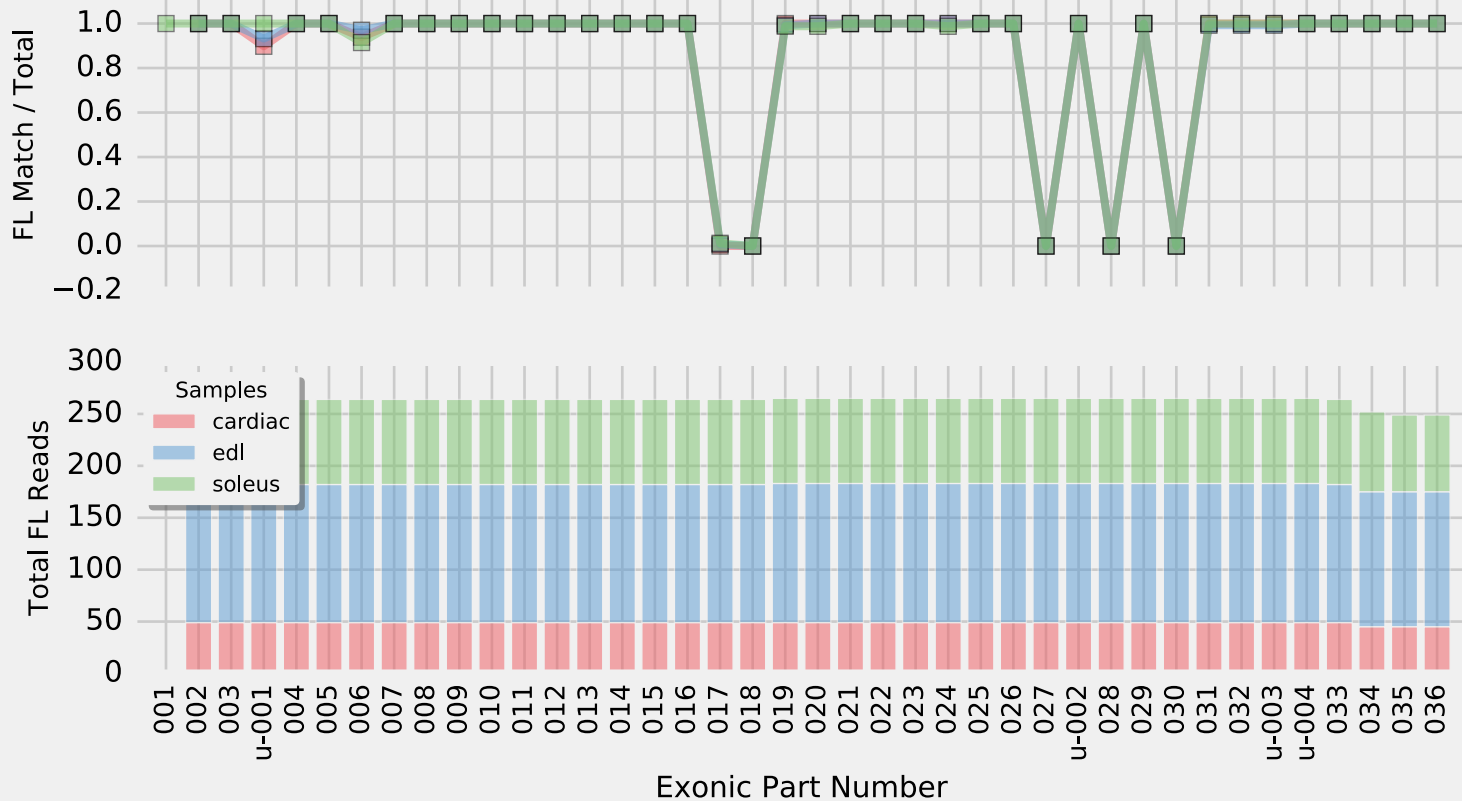

# Mib1

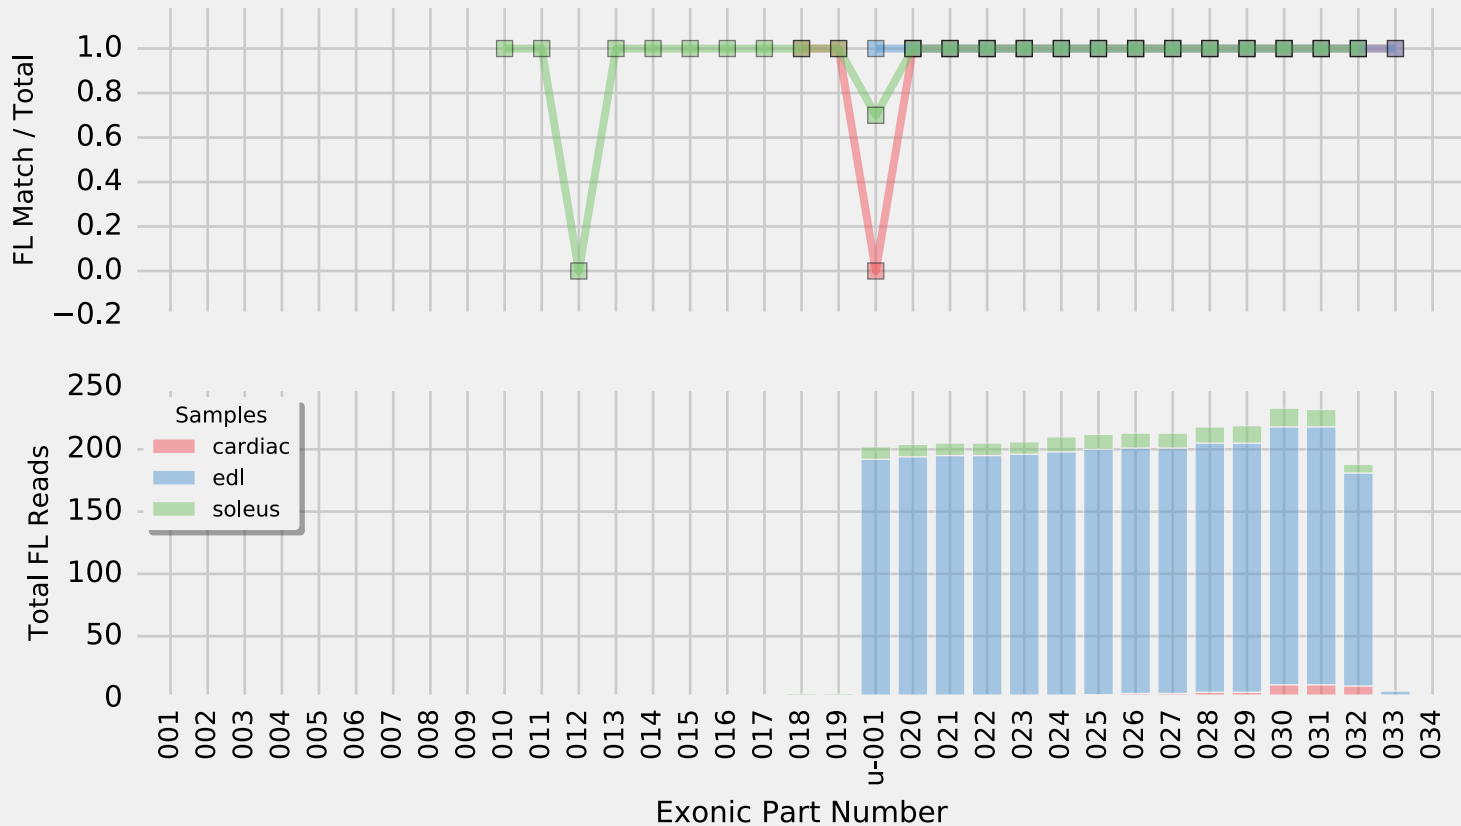

# Mief1

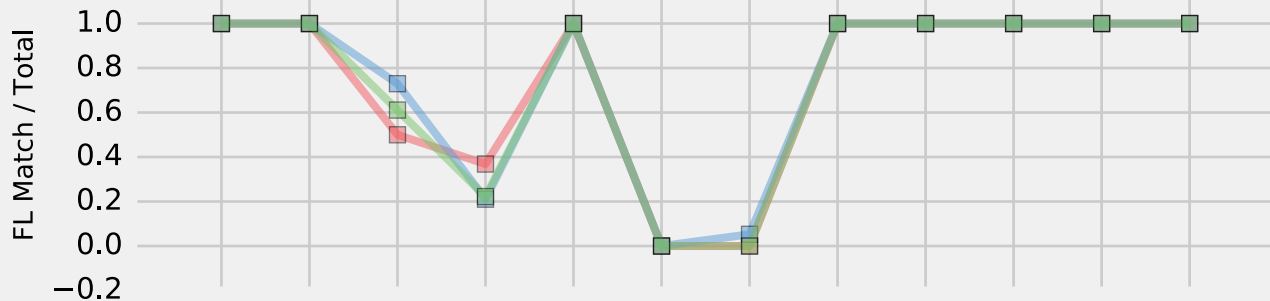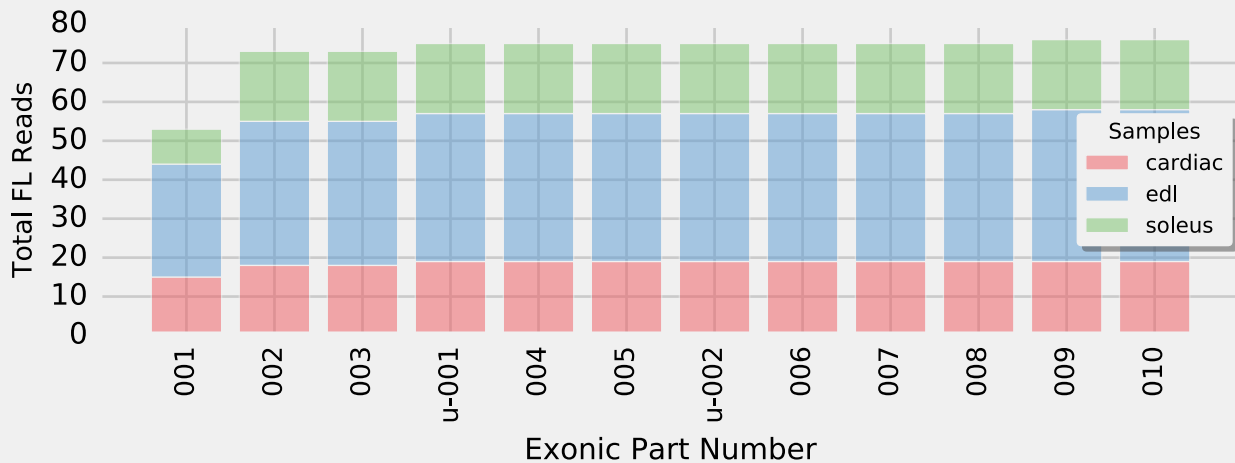

# Mkln1

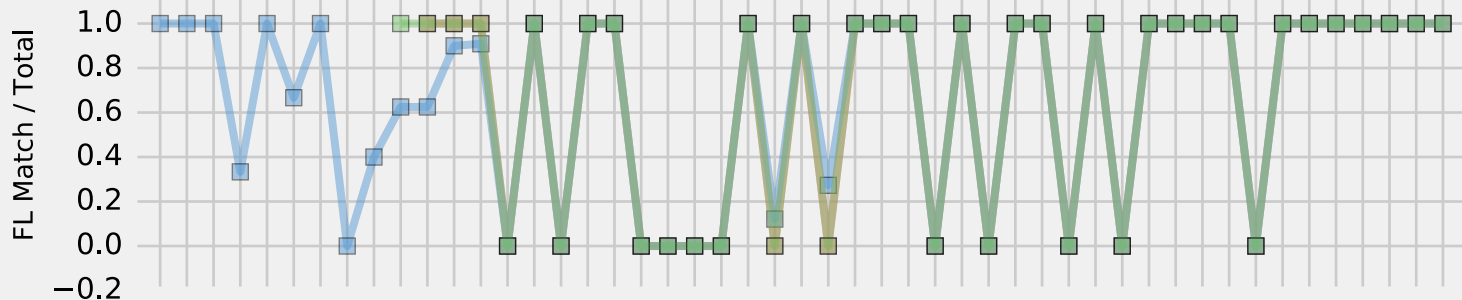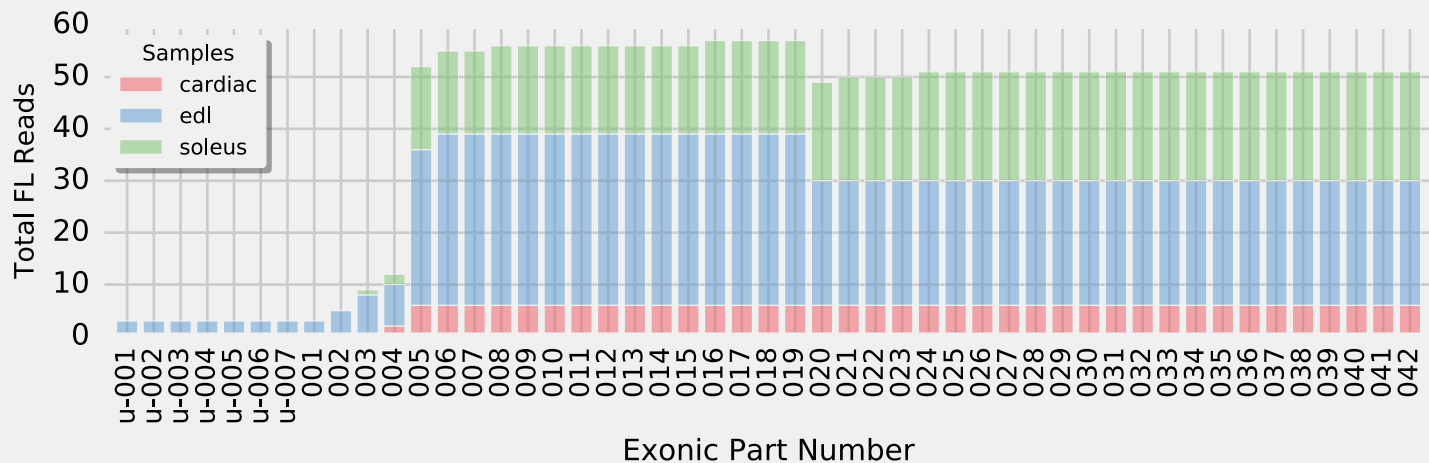

# Mlec

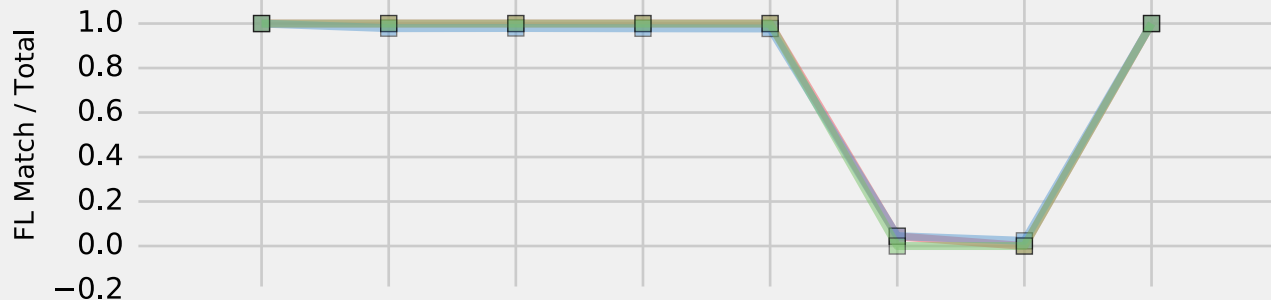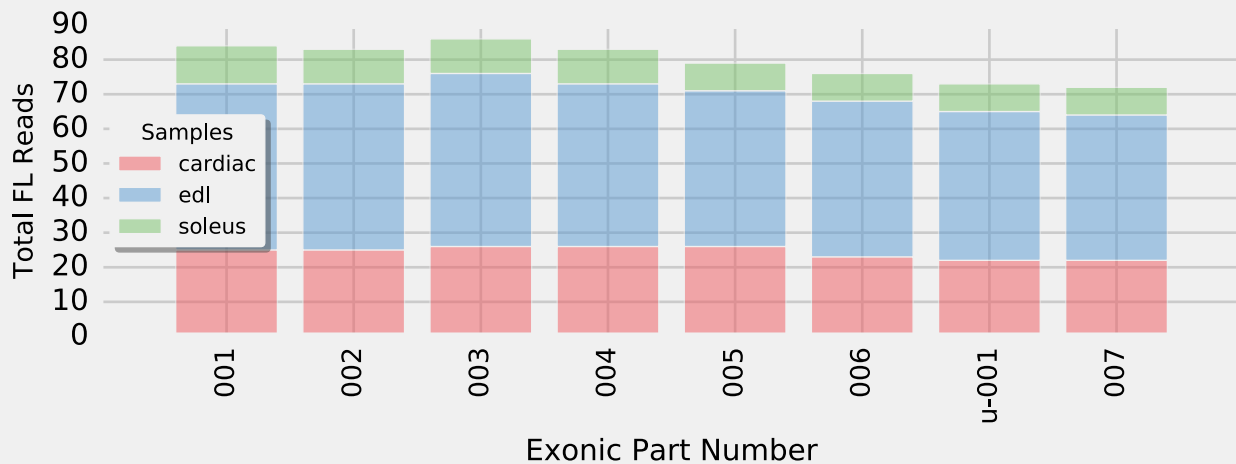

# MIh3

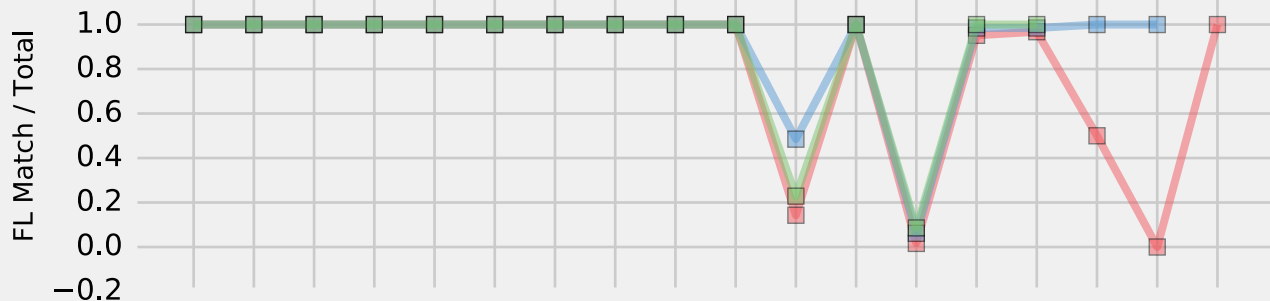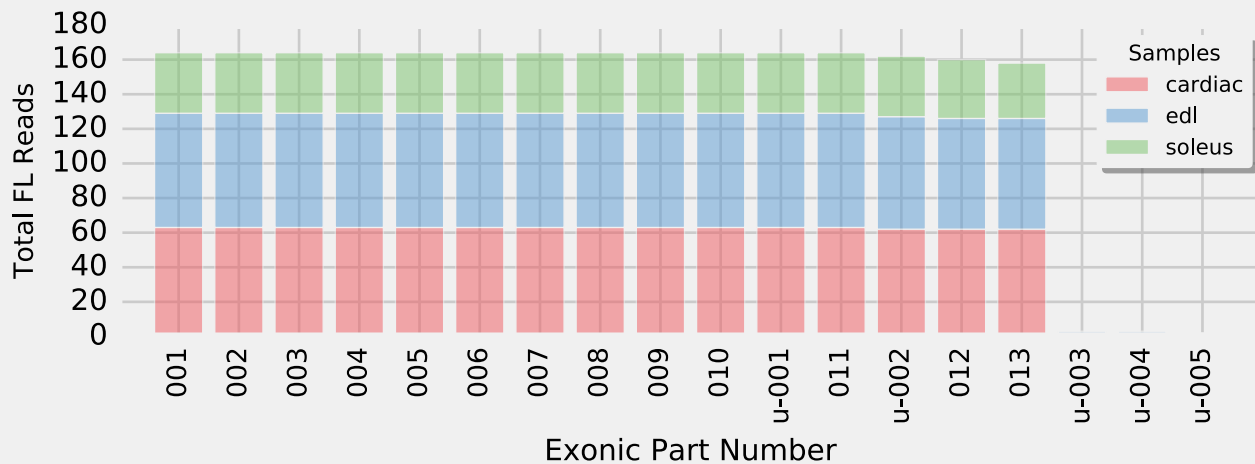

# Mlxip

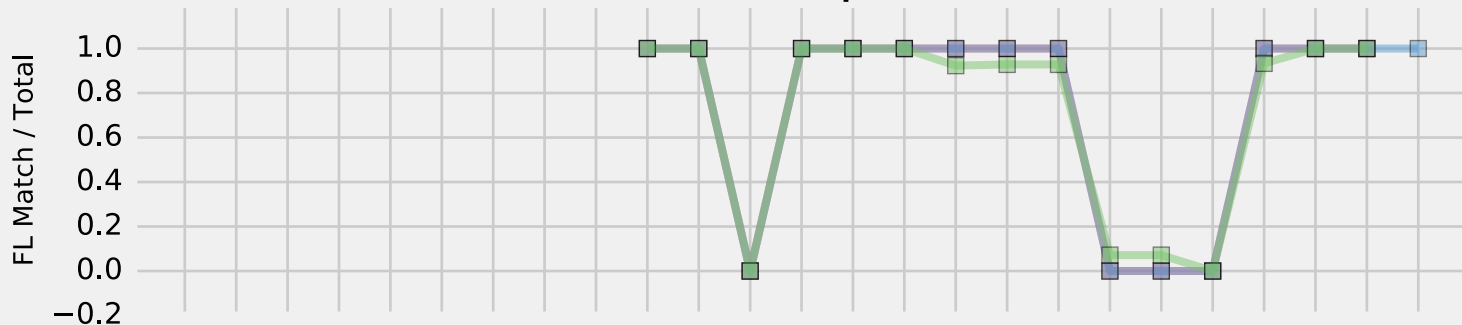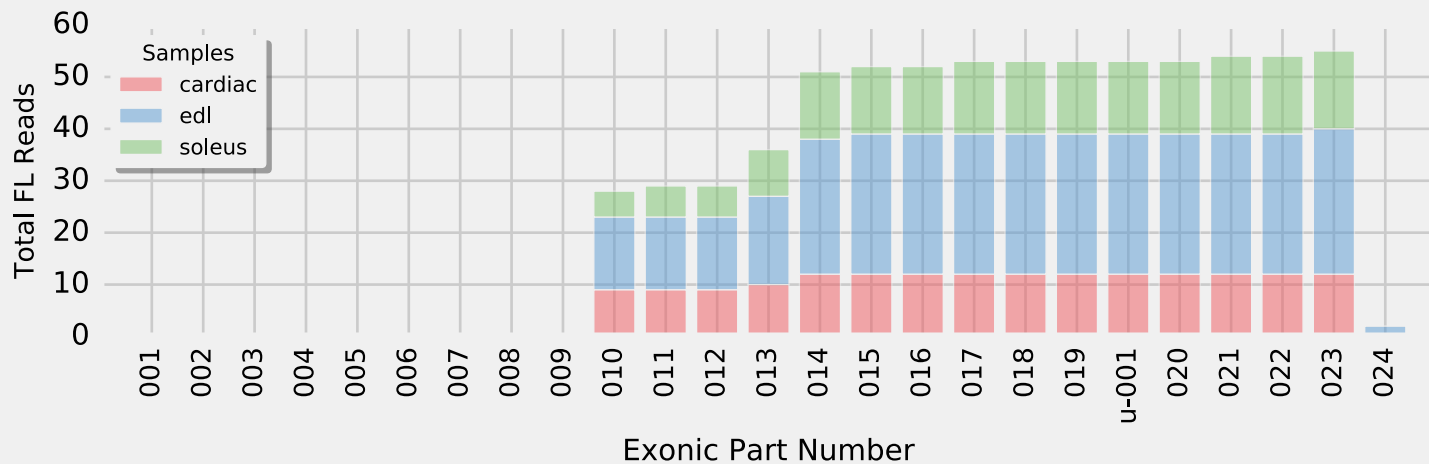



# Mme

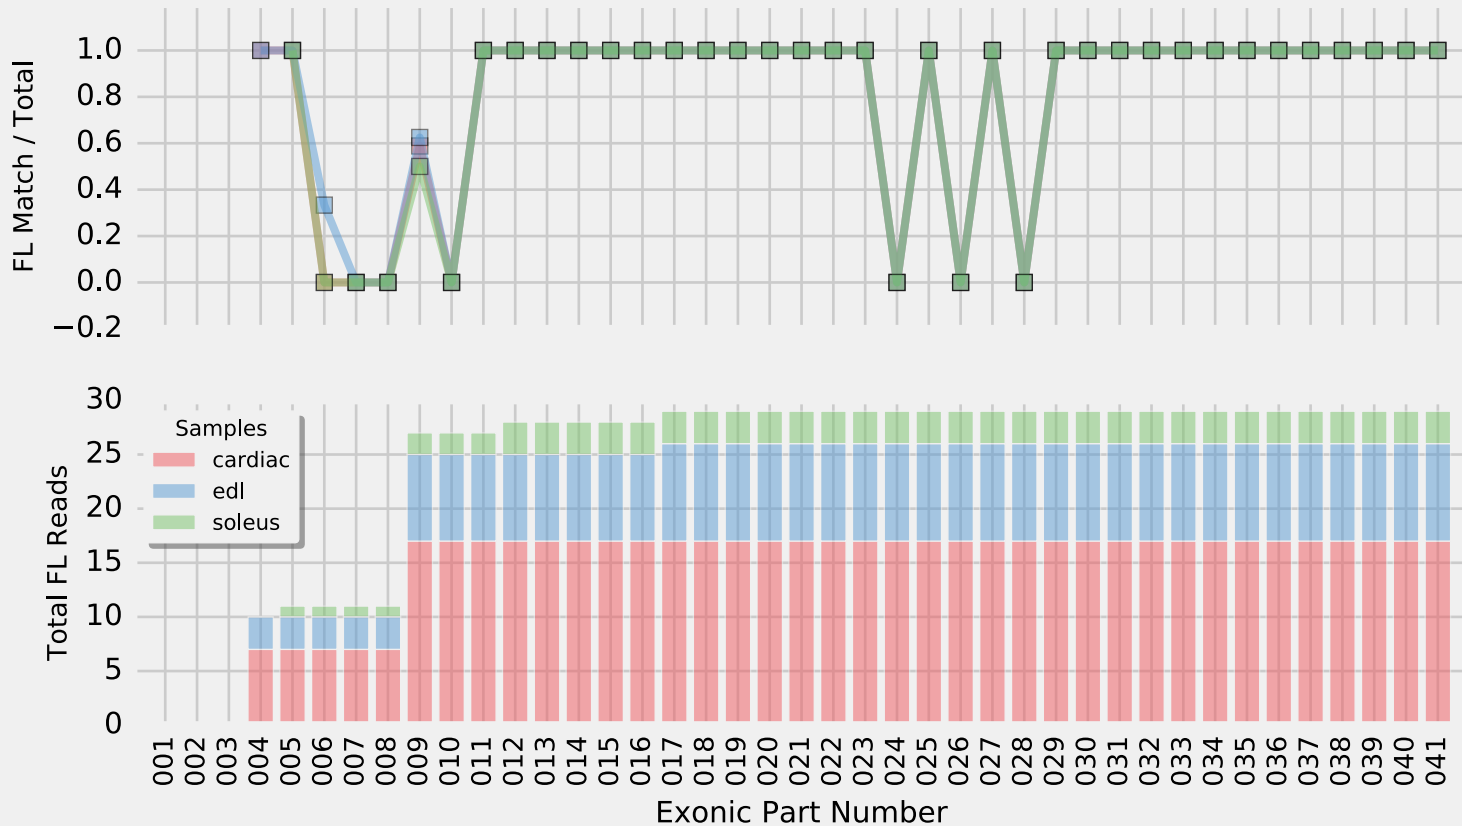

# Mn1

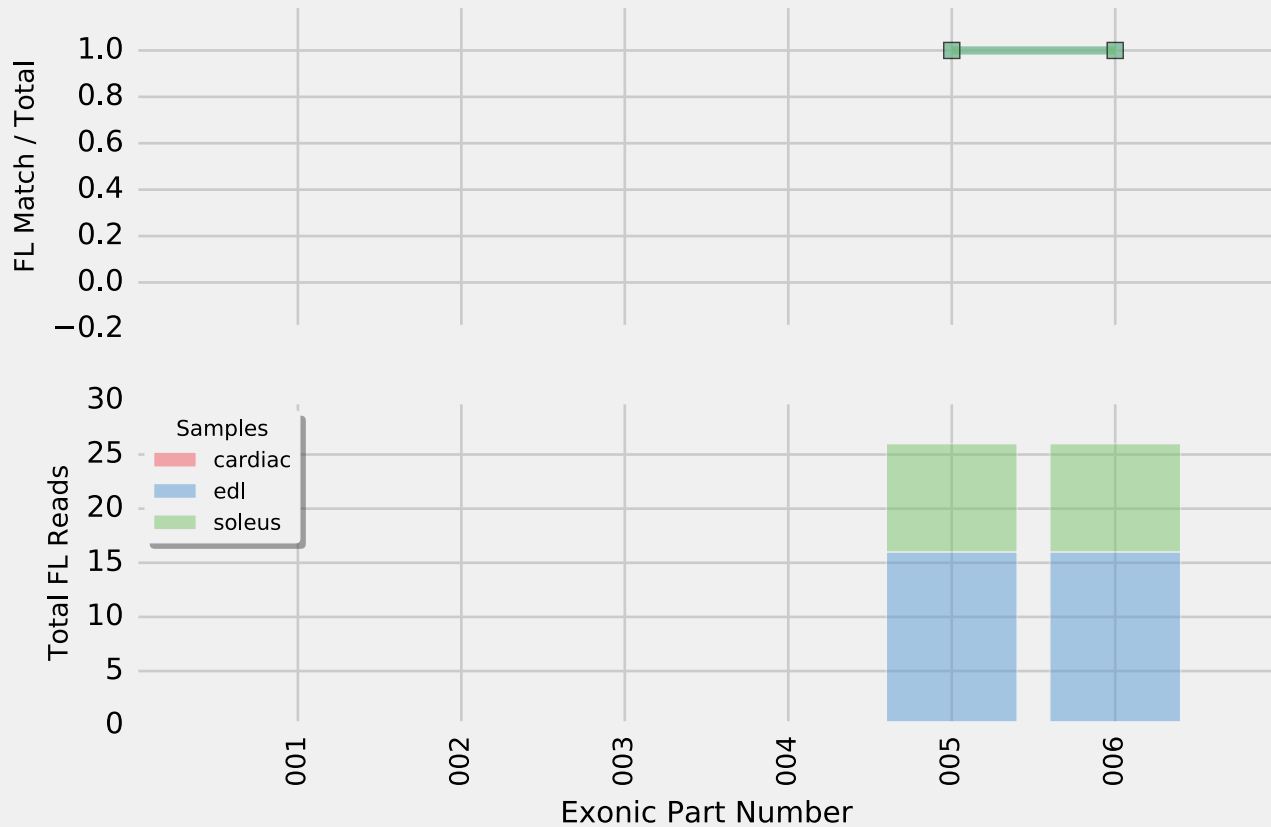

# Morc2a

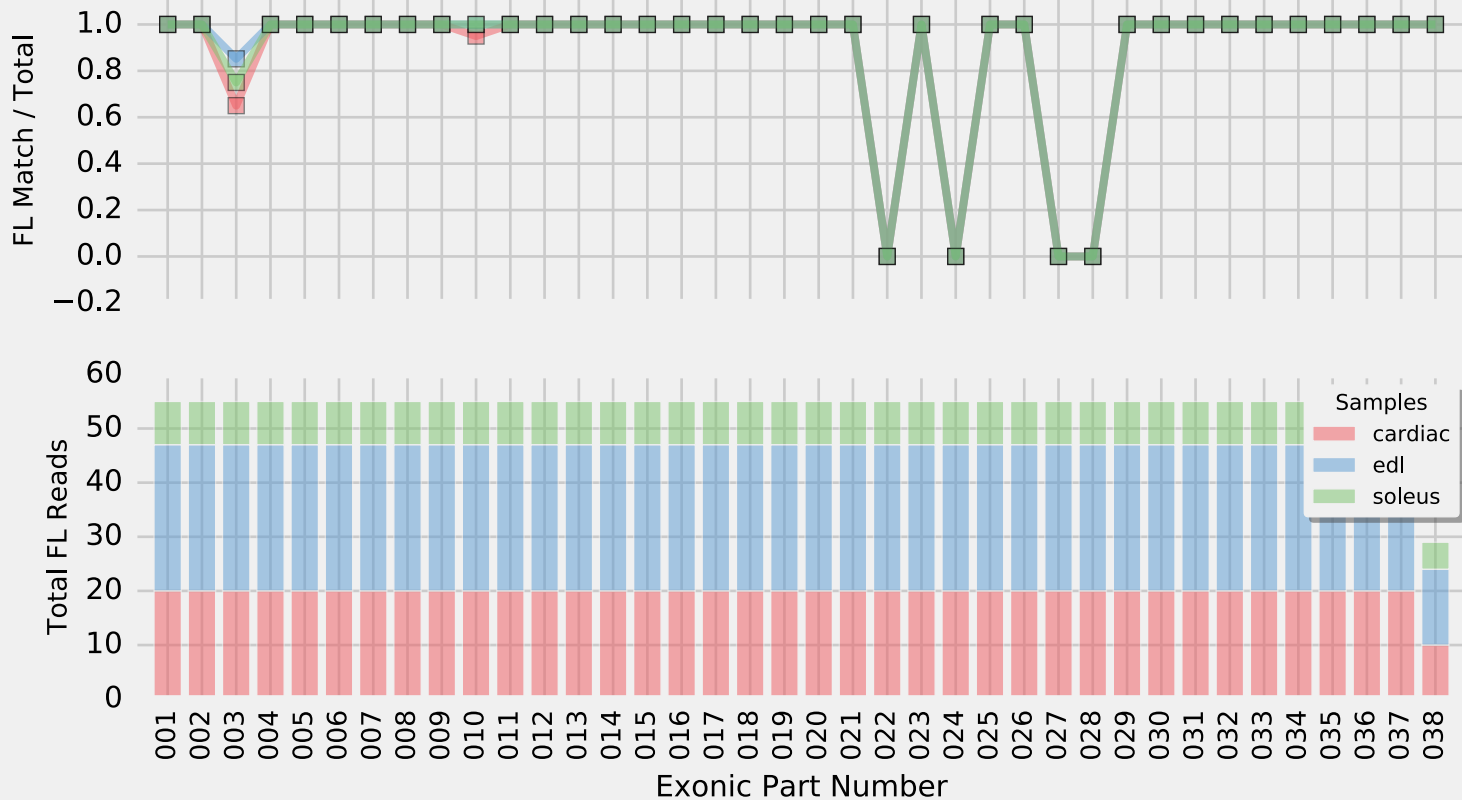

# Mpdz

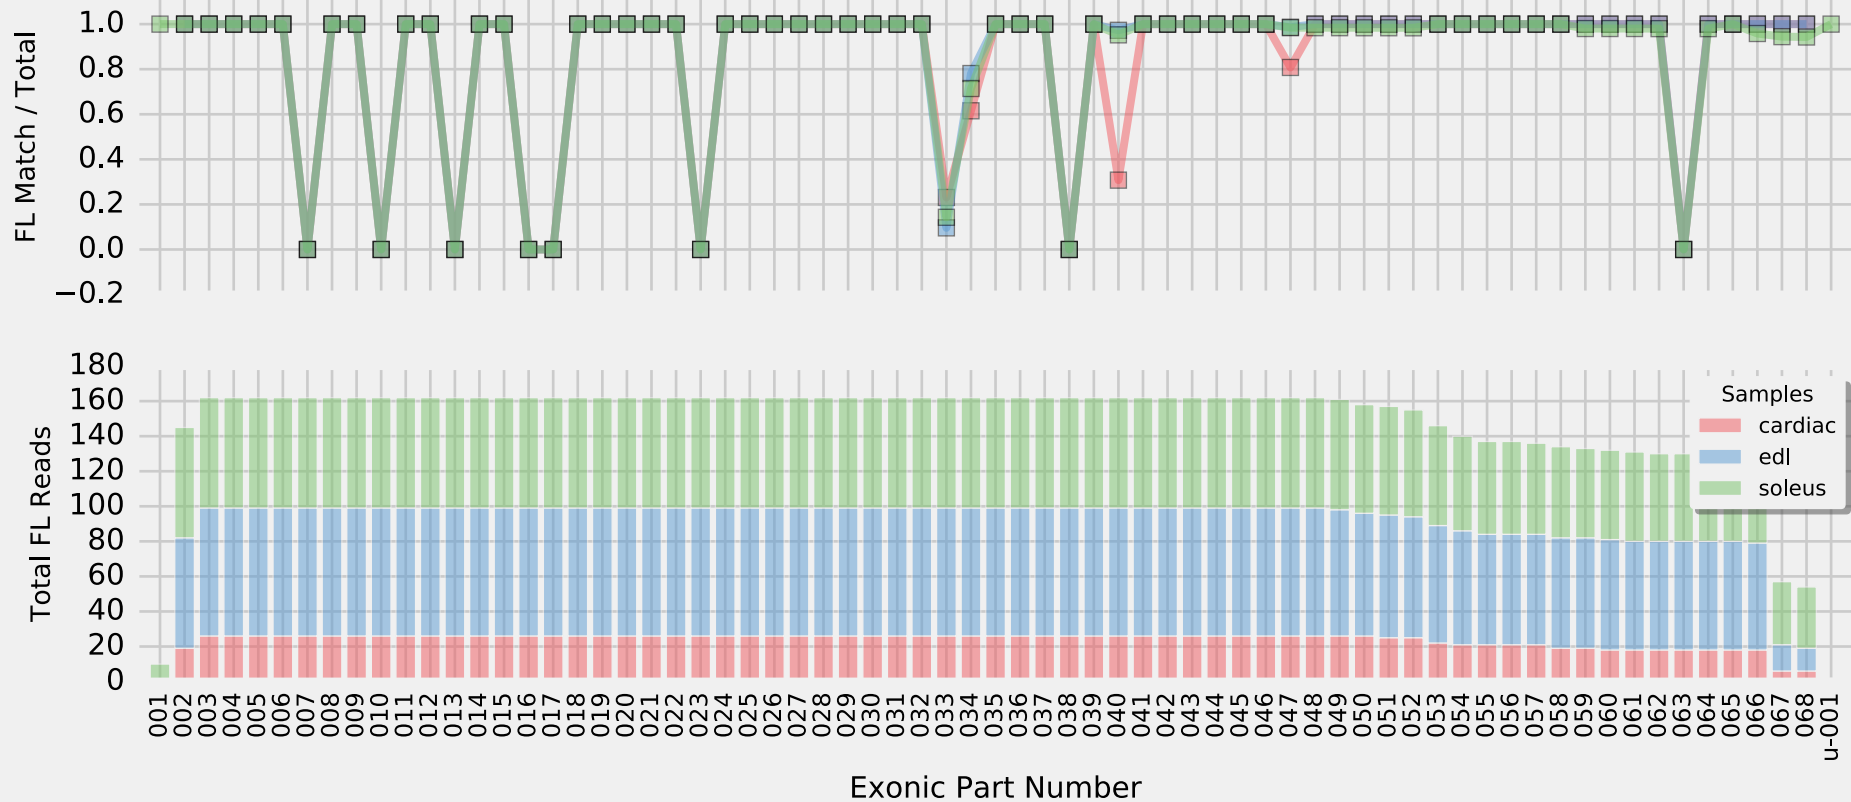

# Mpp5

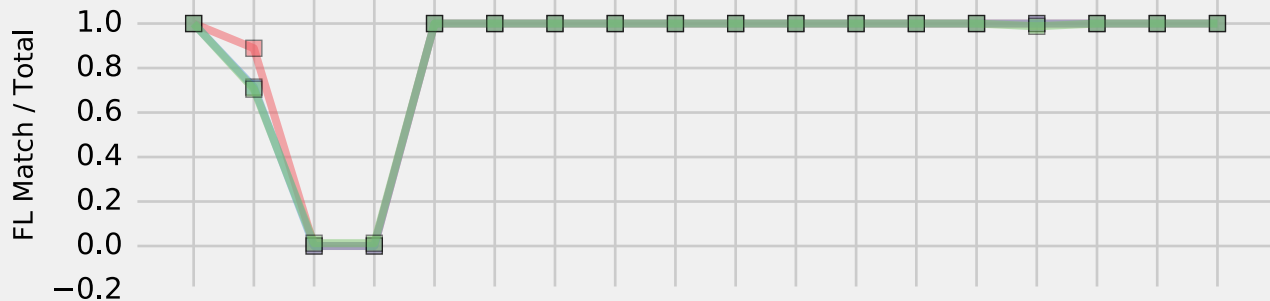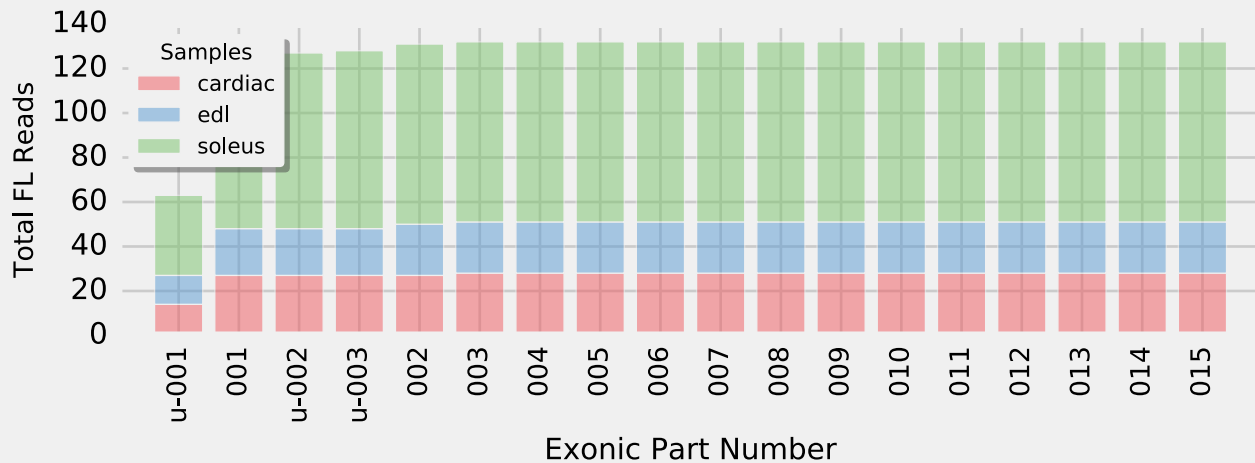

# Mprip

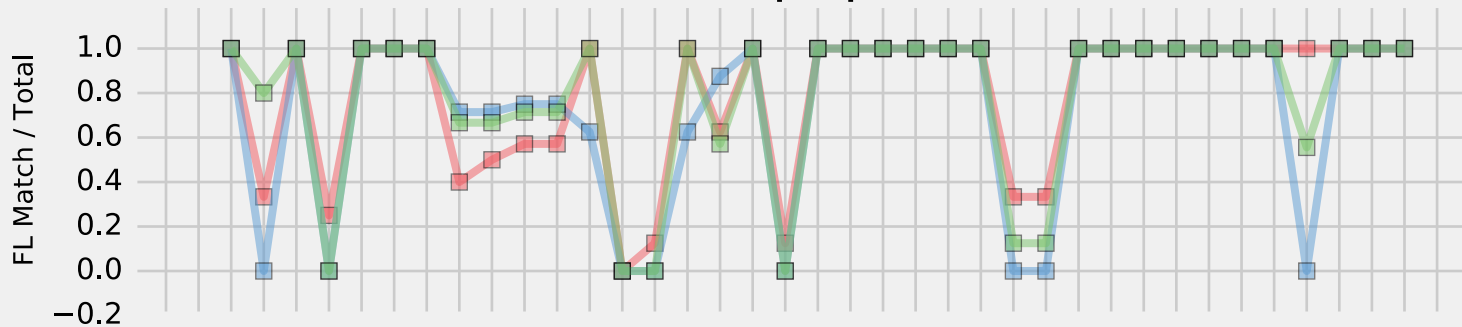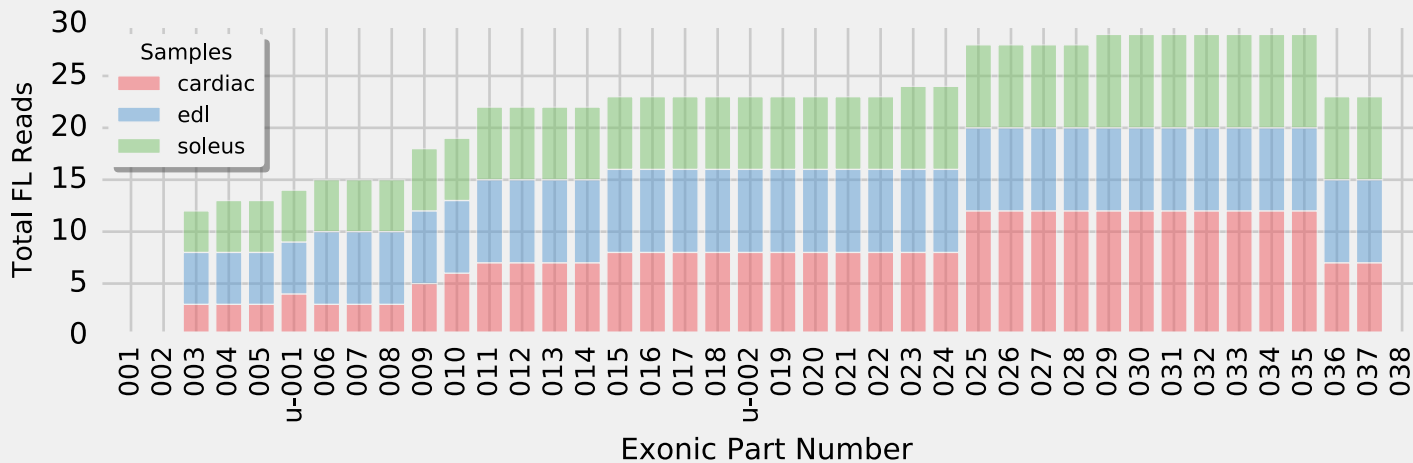

# Mre11a

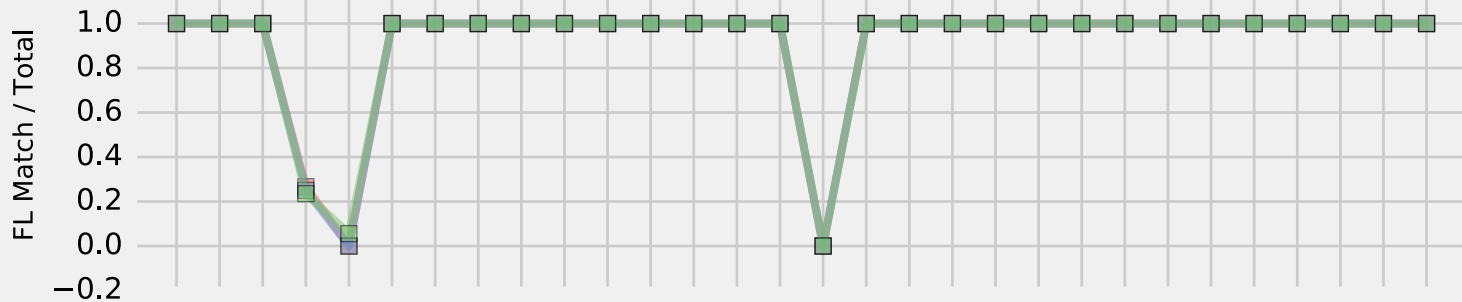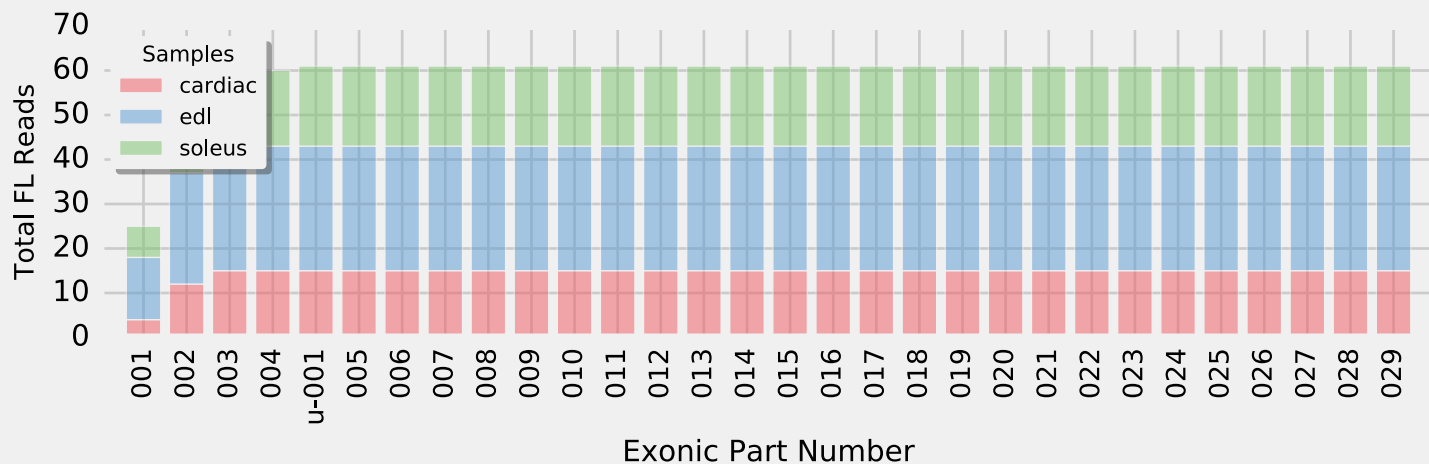

# Mroh1

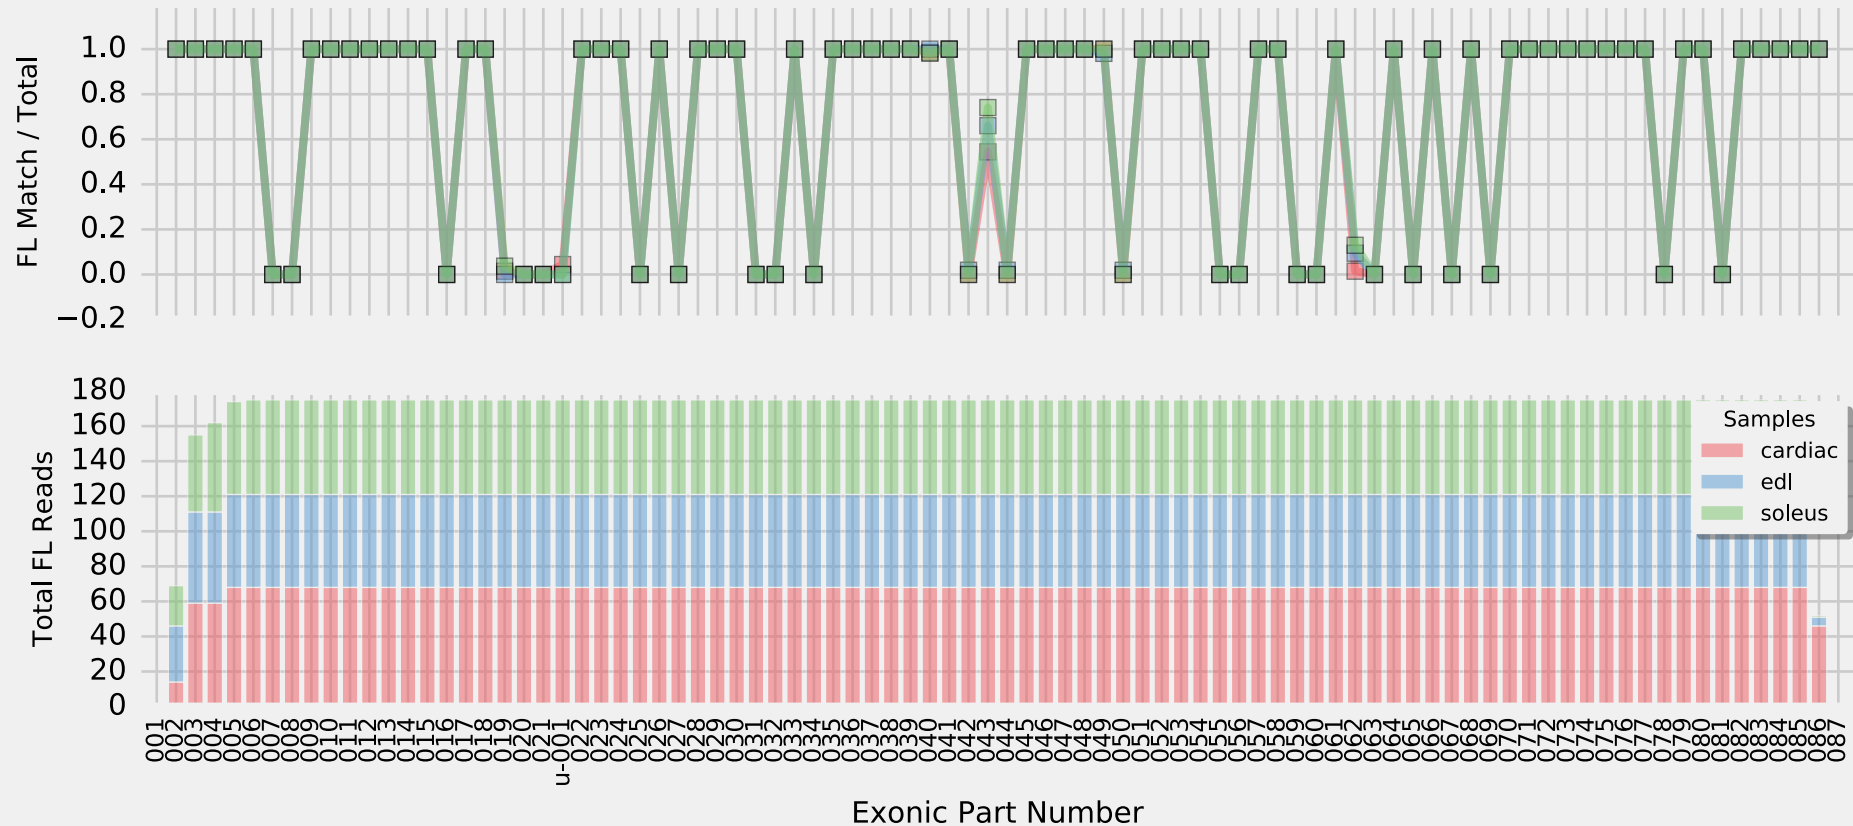



# Mrs2

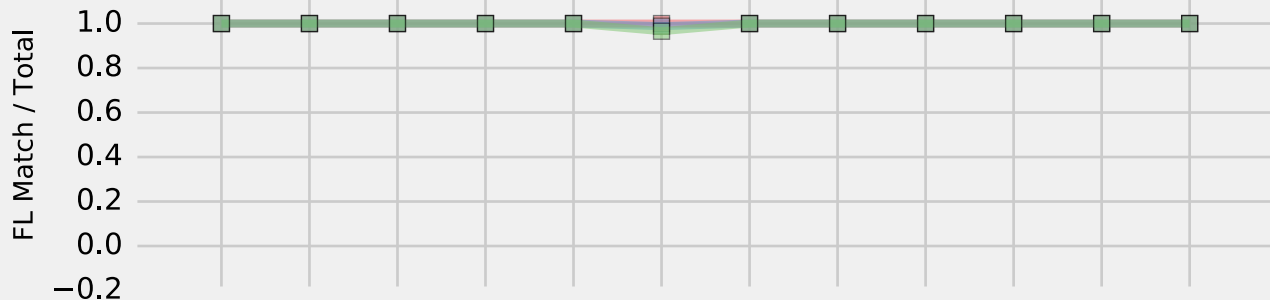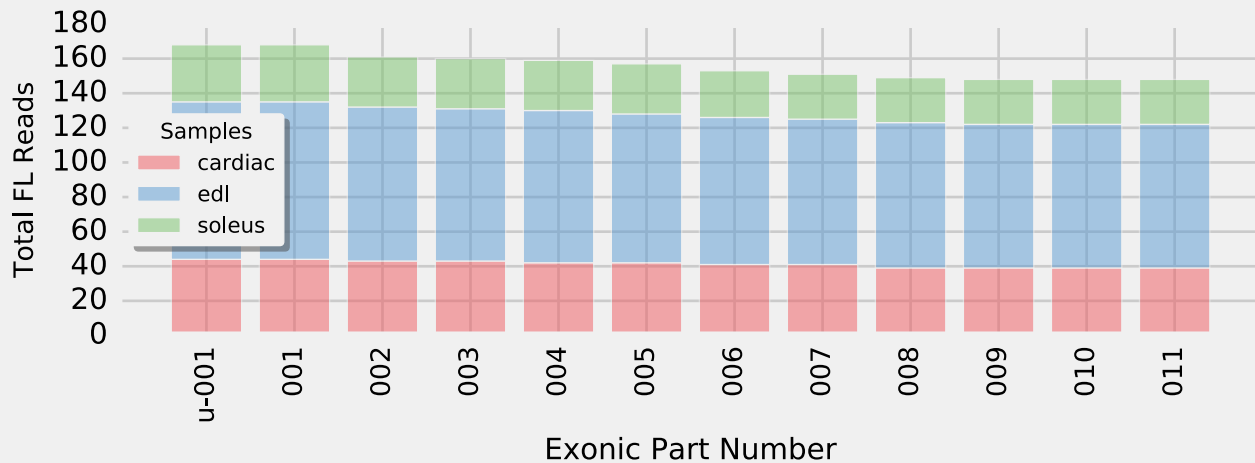

# Msl3

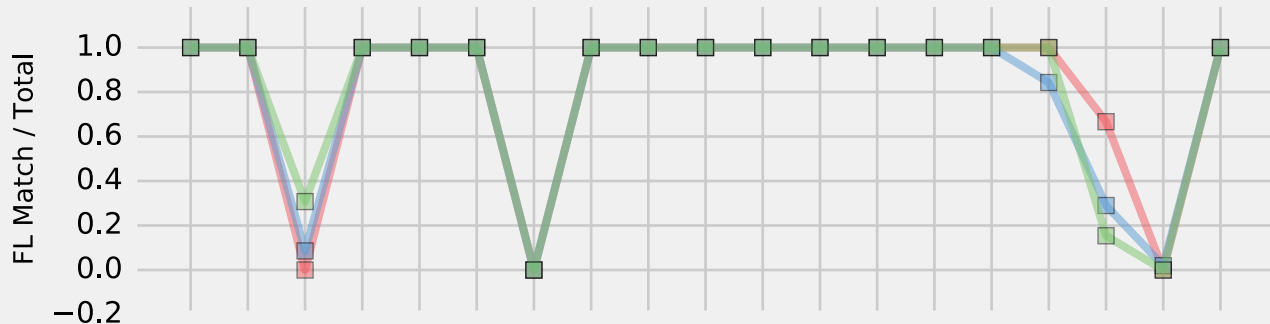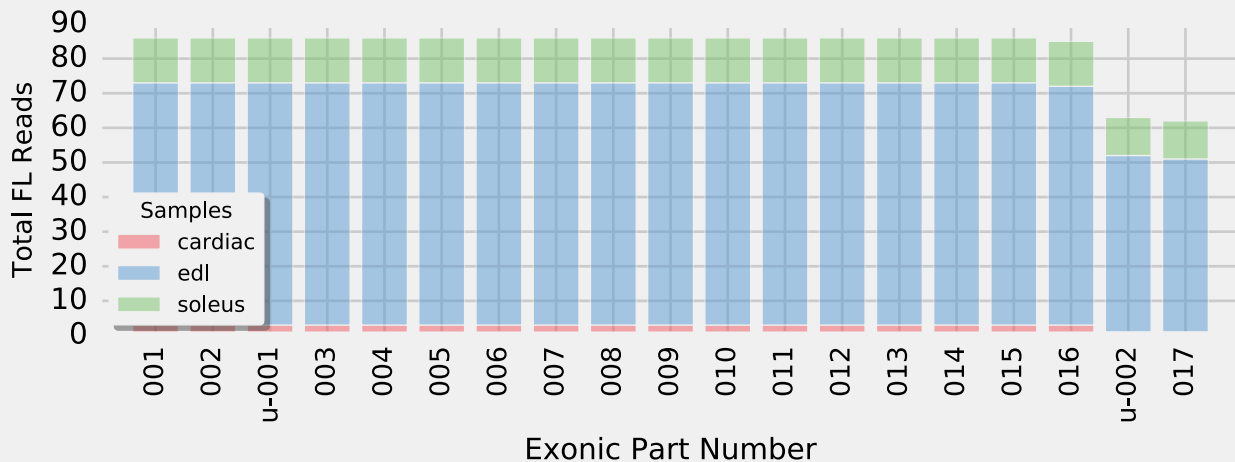

# Mtmt3

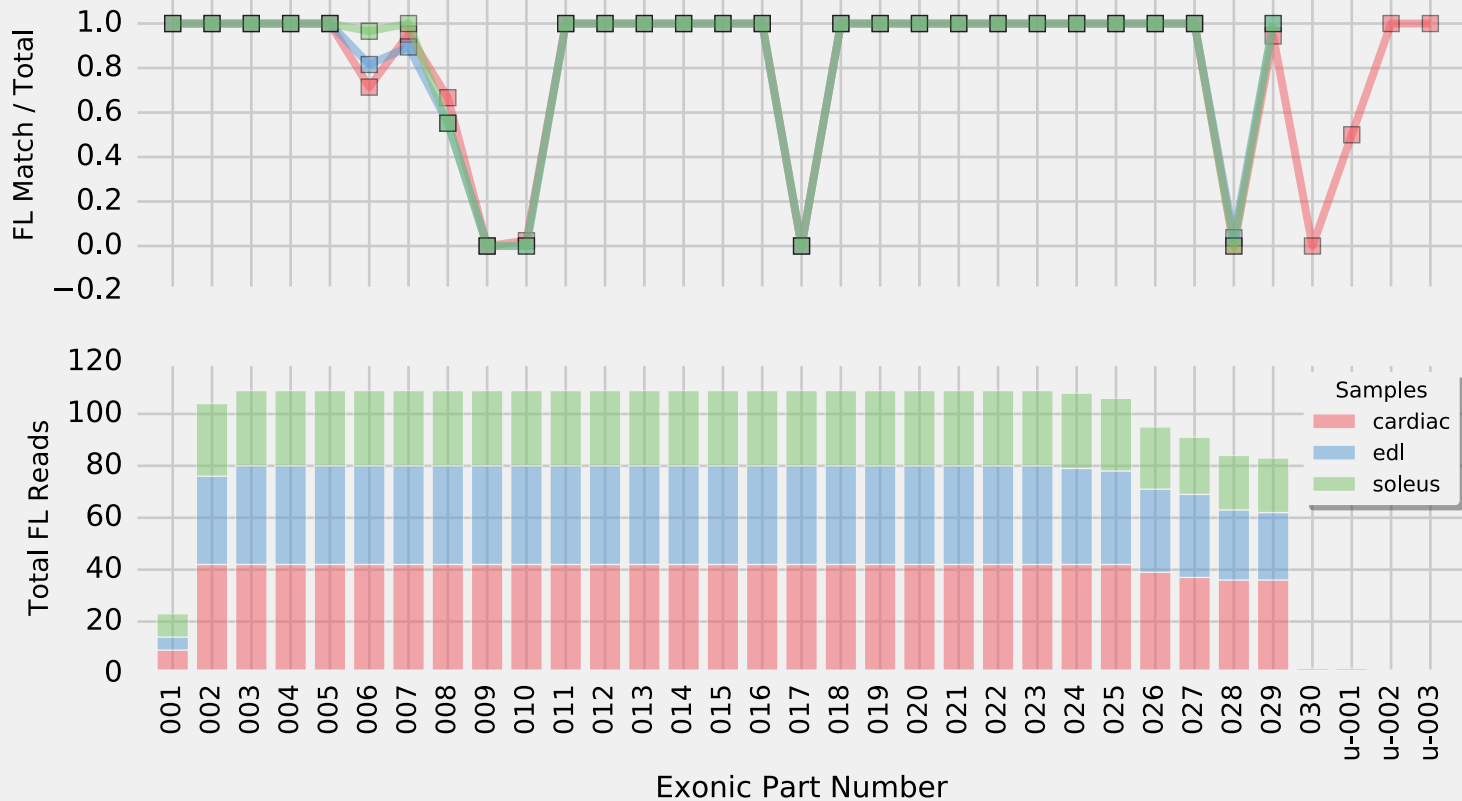

# Mtmr4

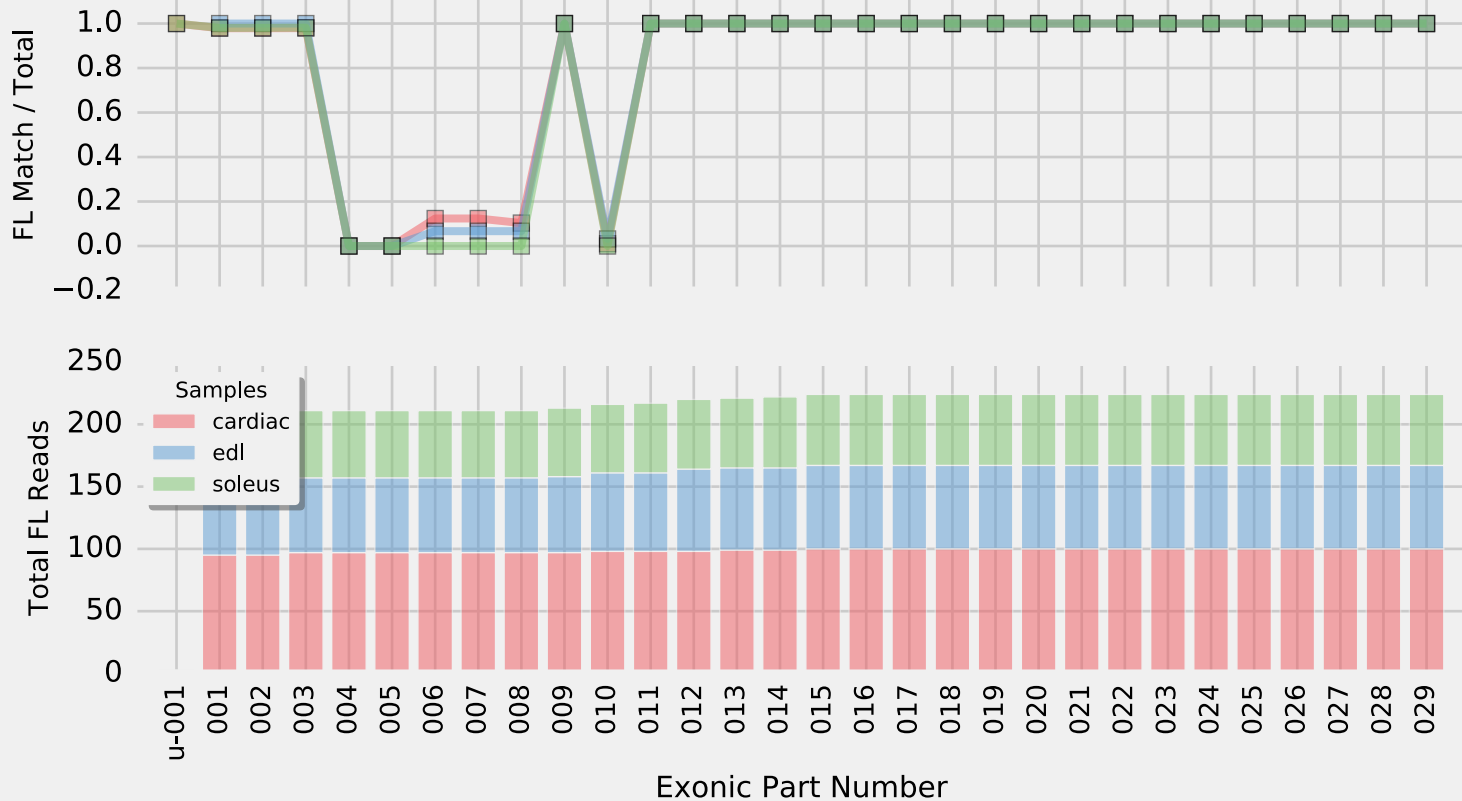

# Mtor

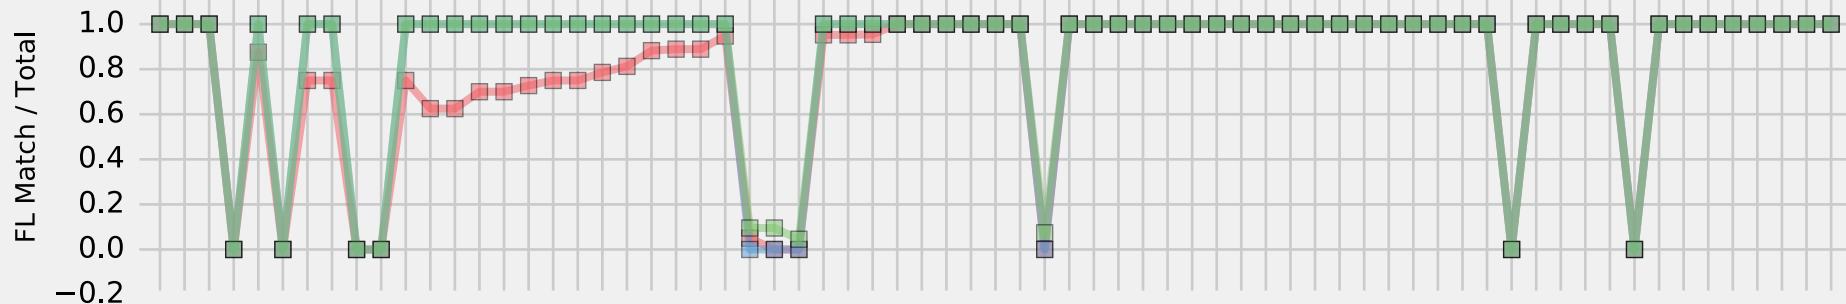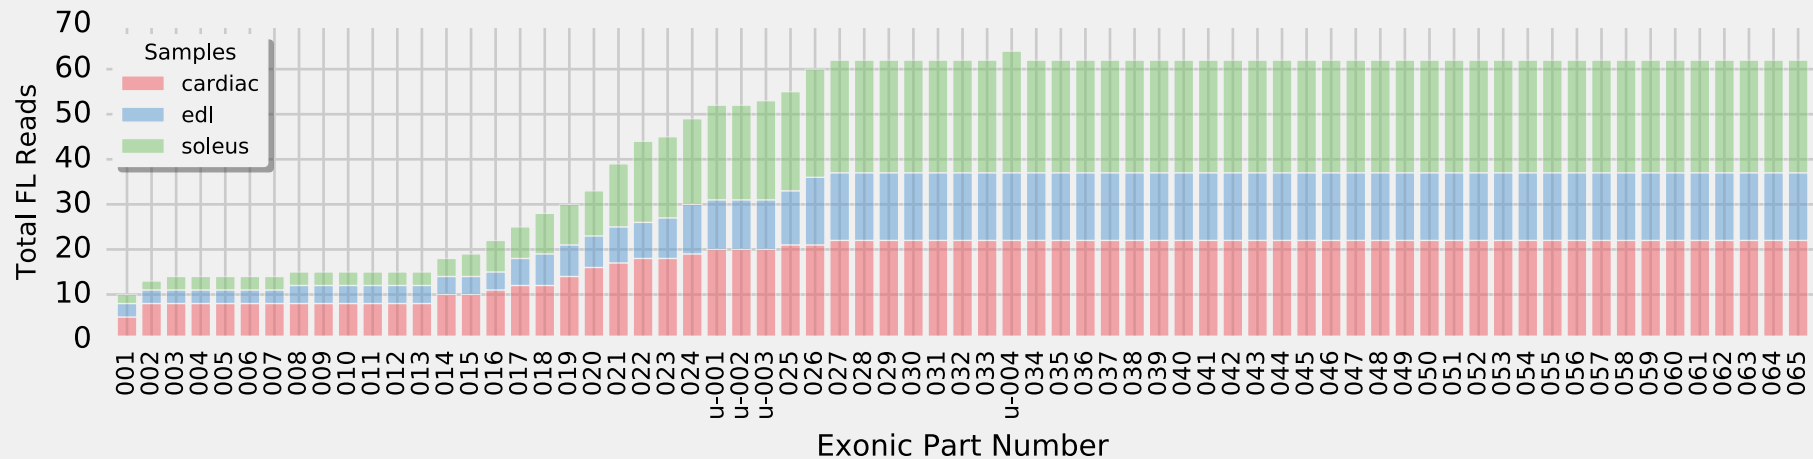

# Mturn

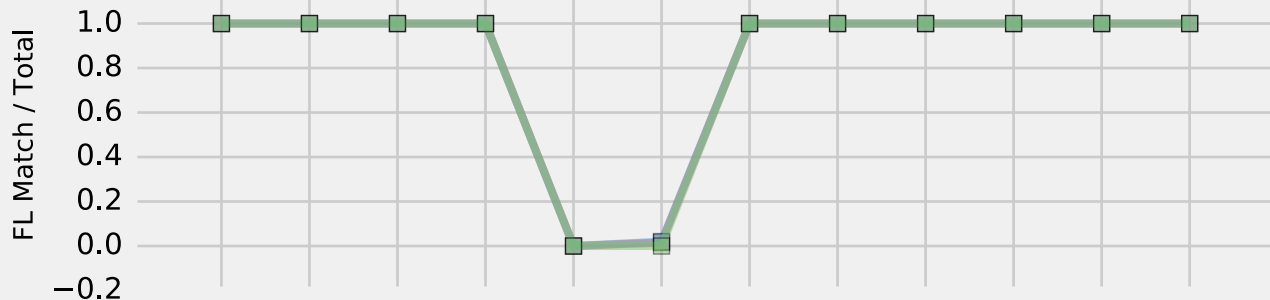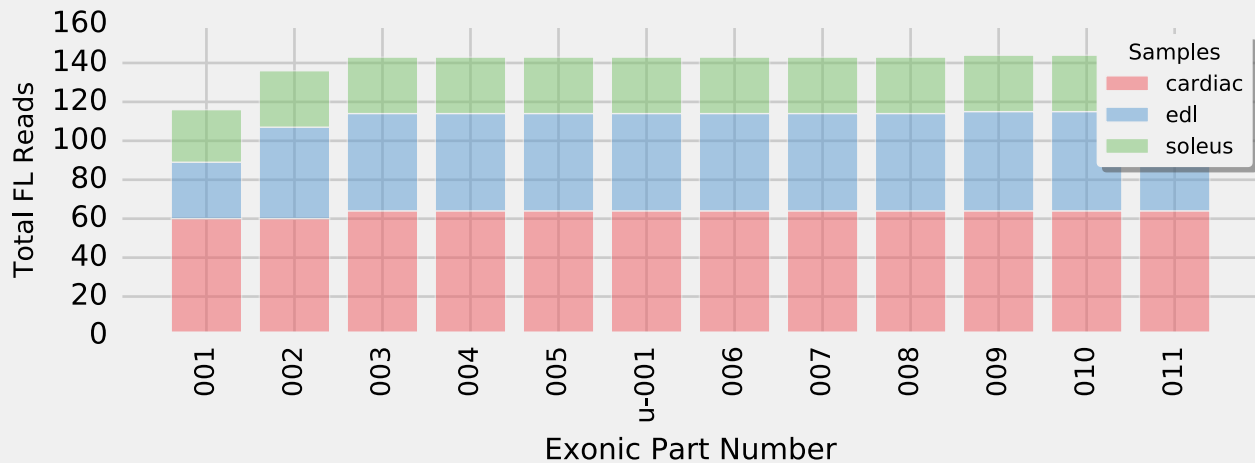

# Mtus1

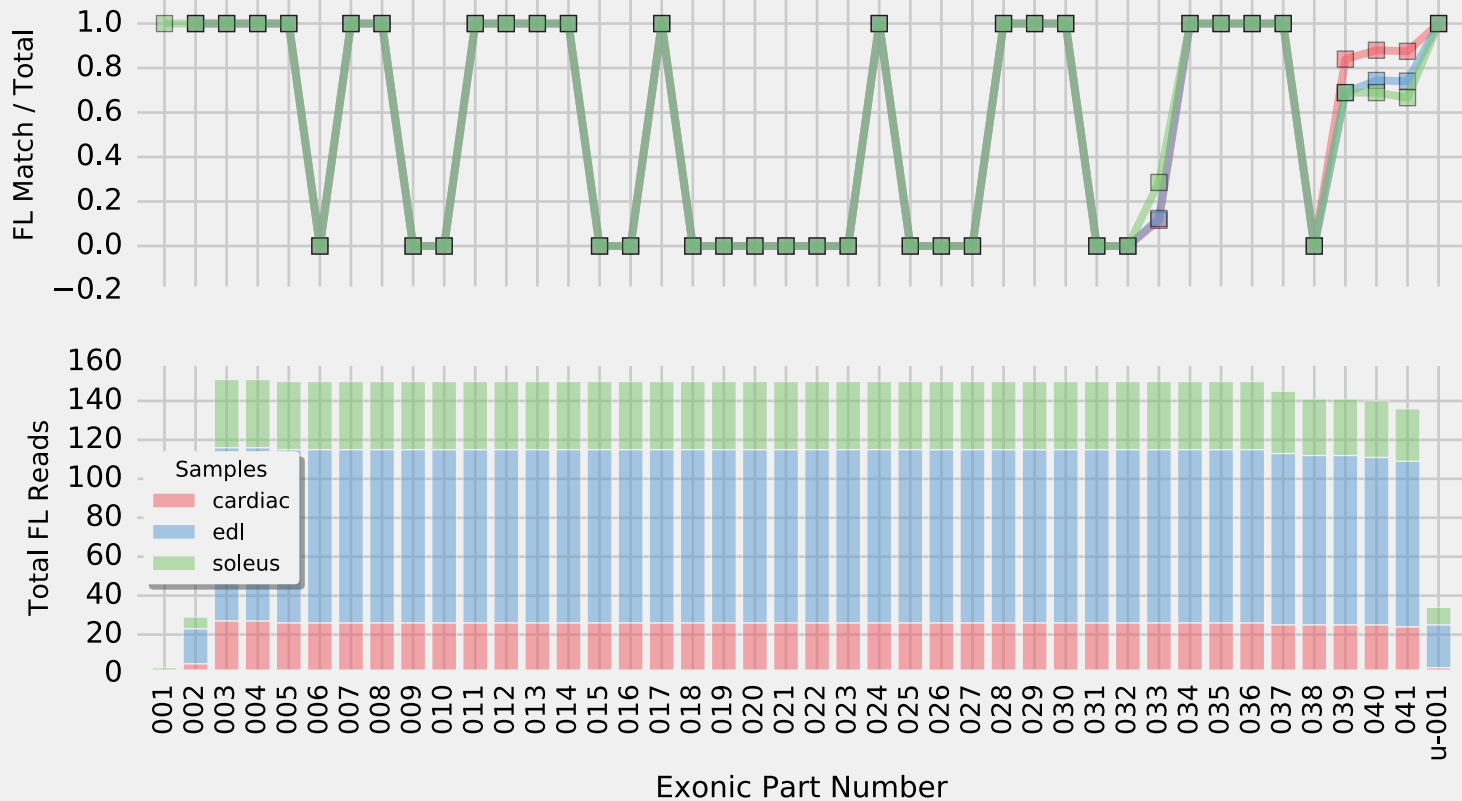

# Musk

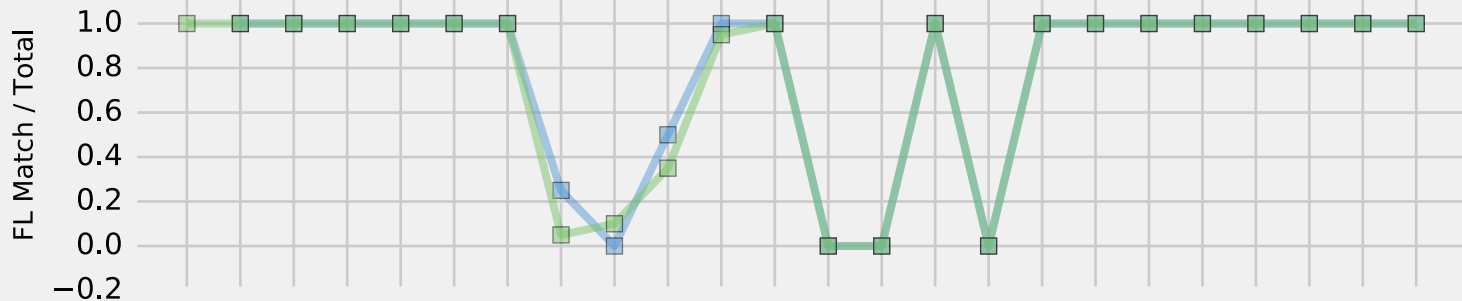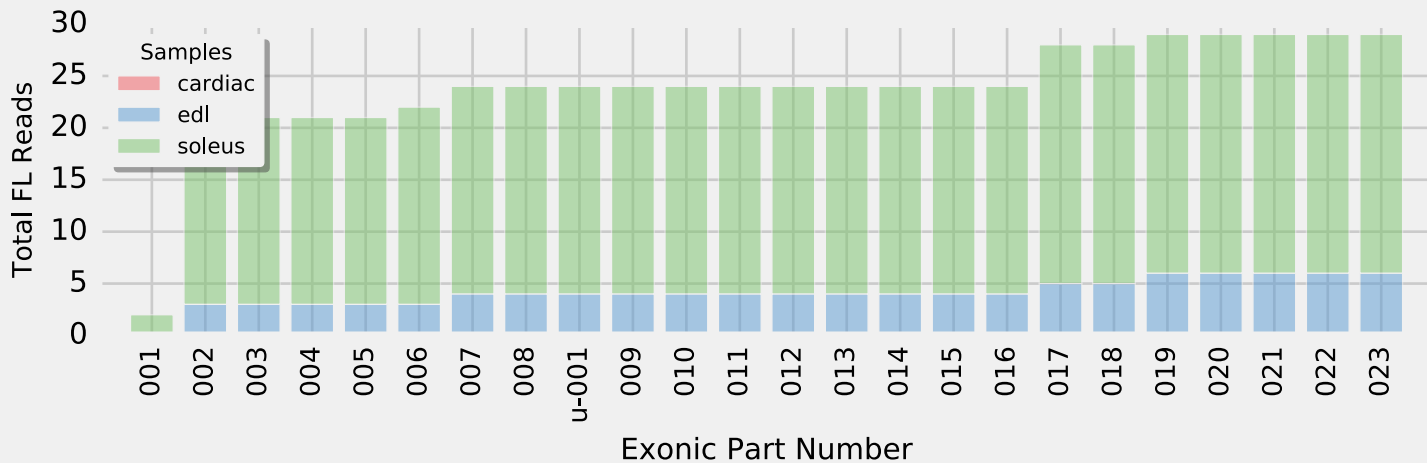



# Mybpc1

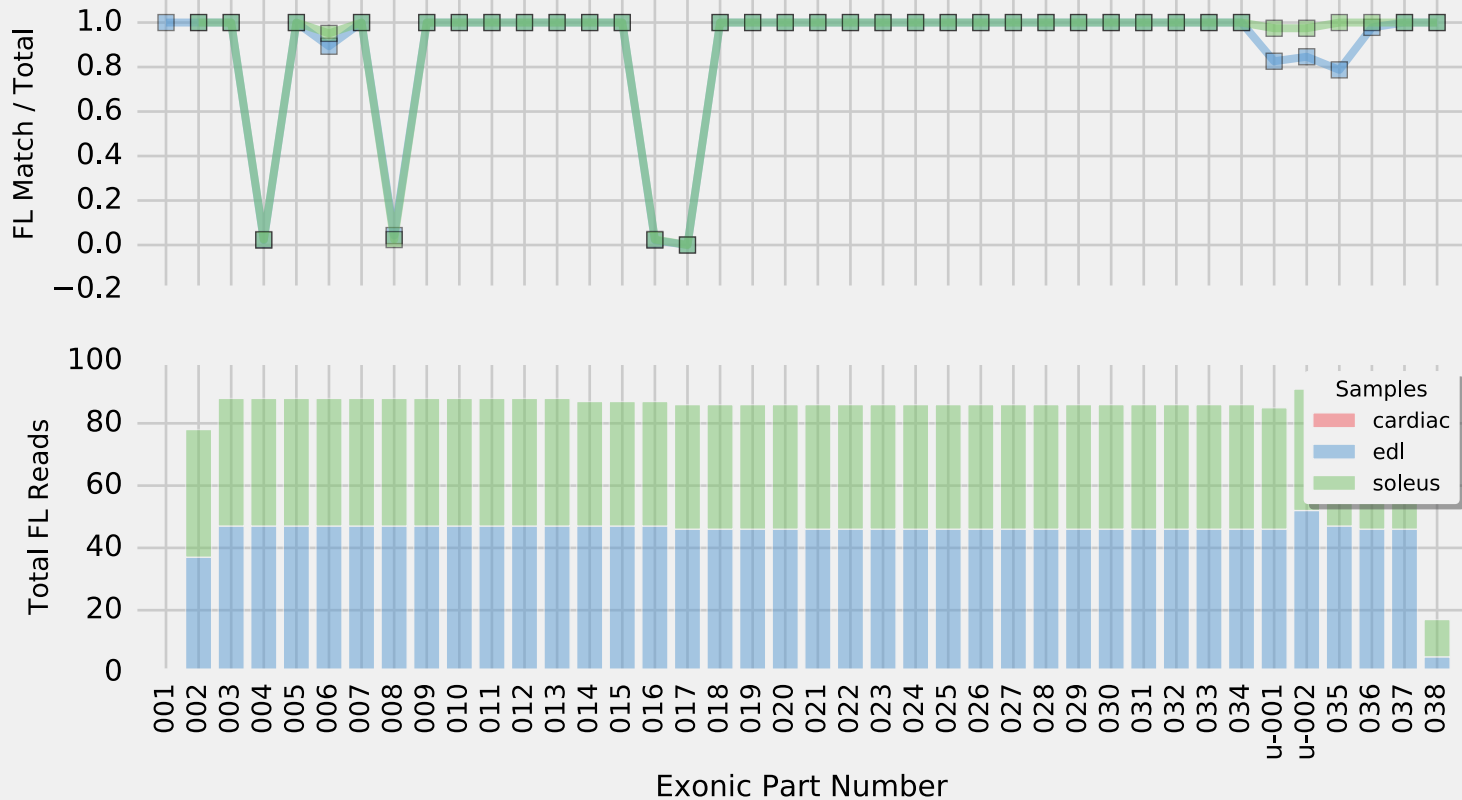

# Mycbp2

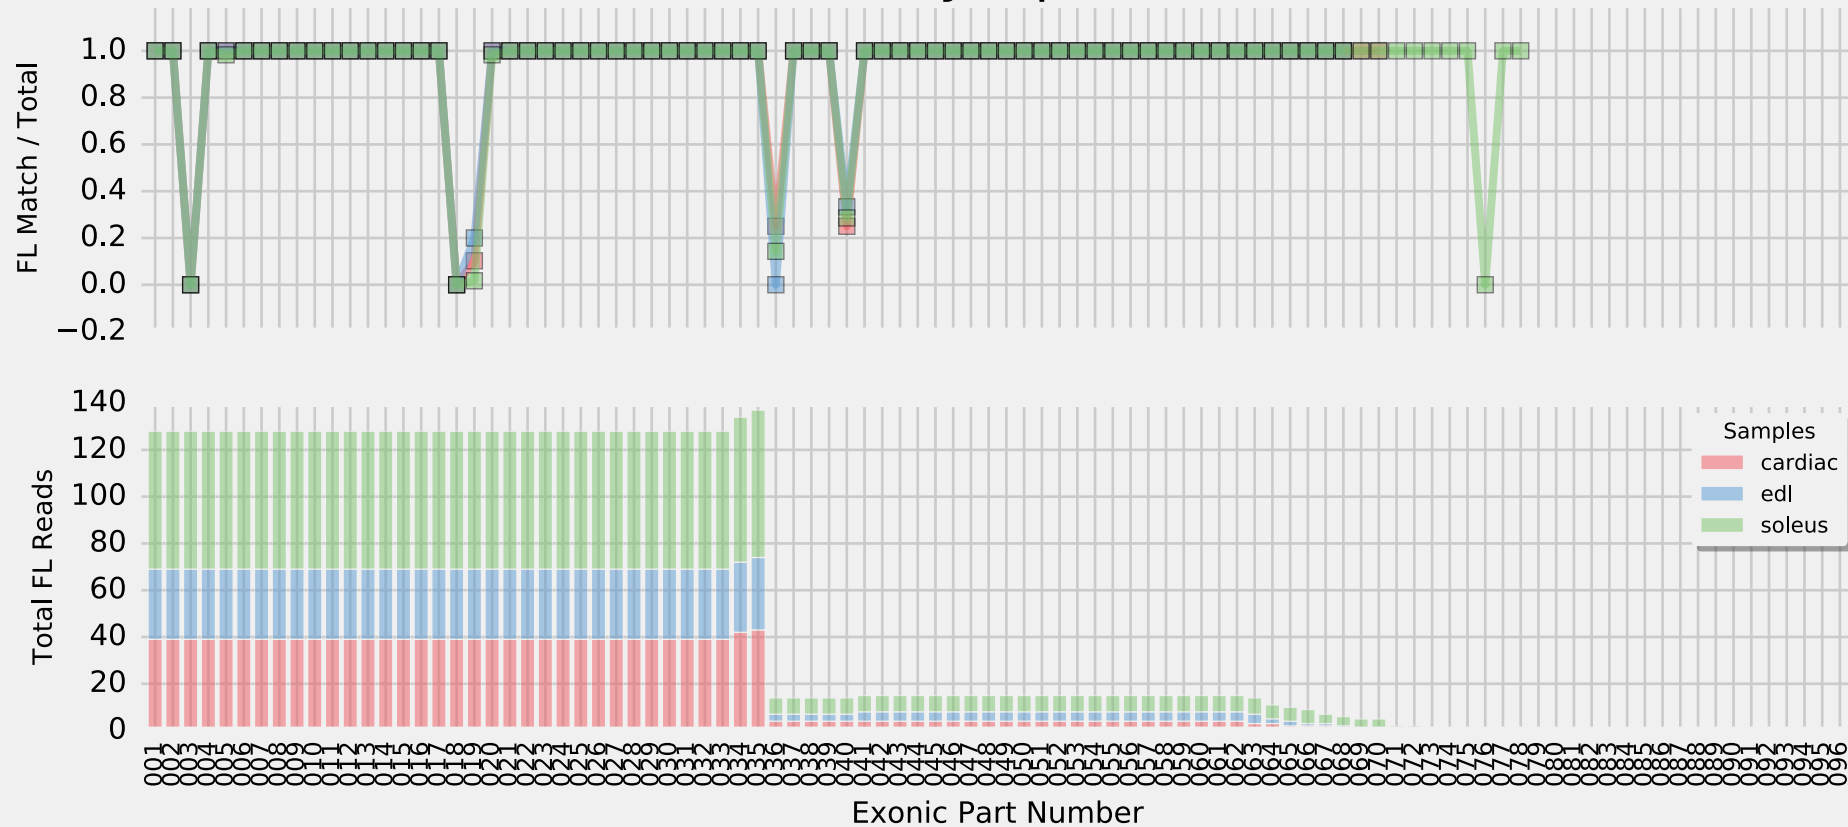

# Myh1

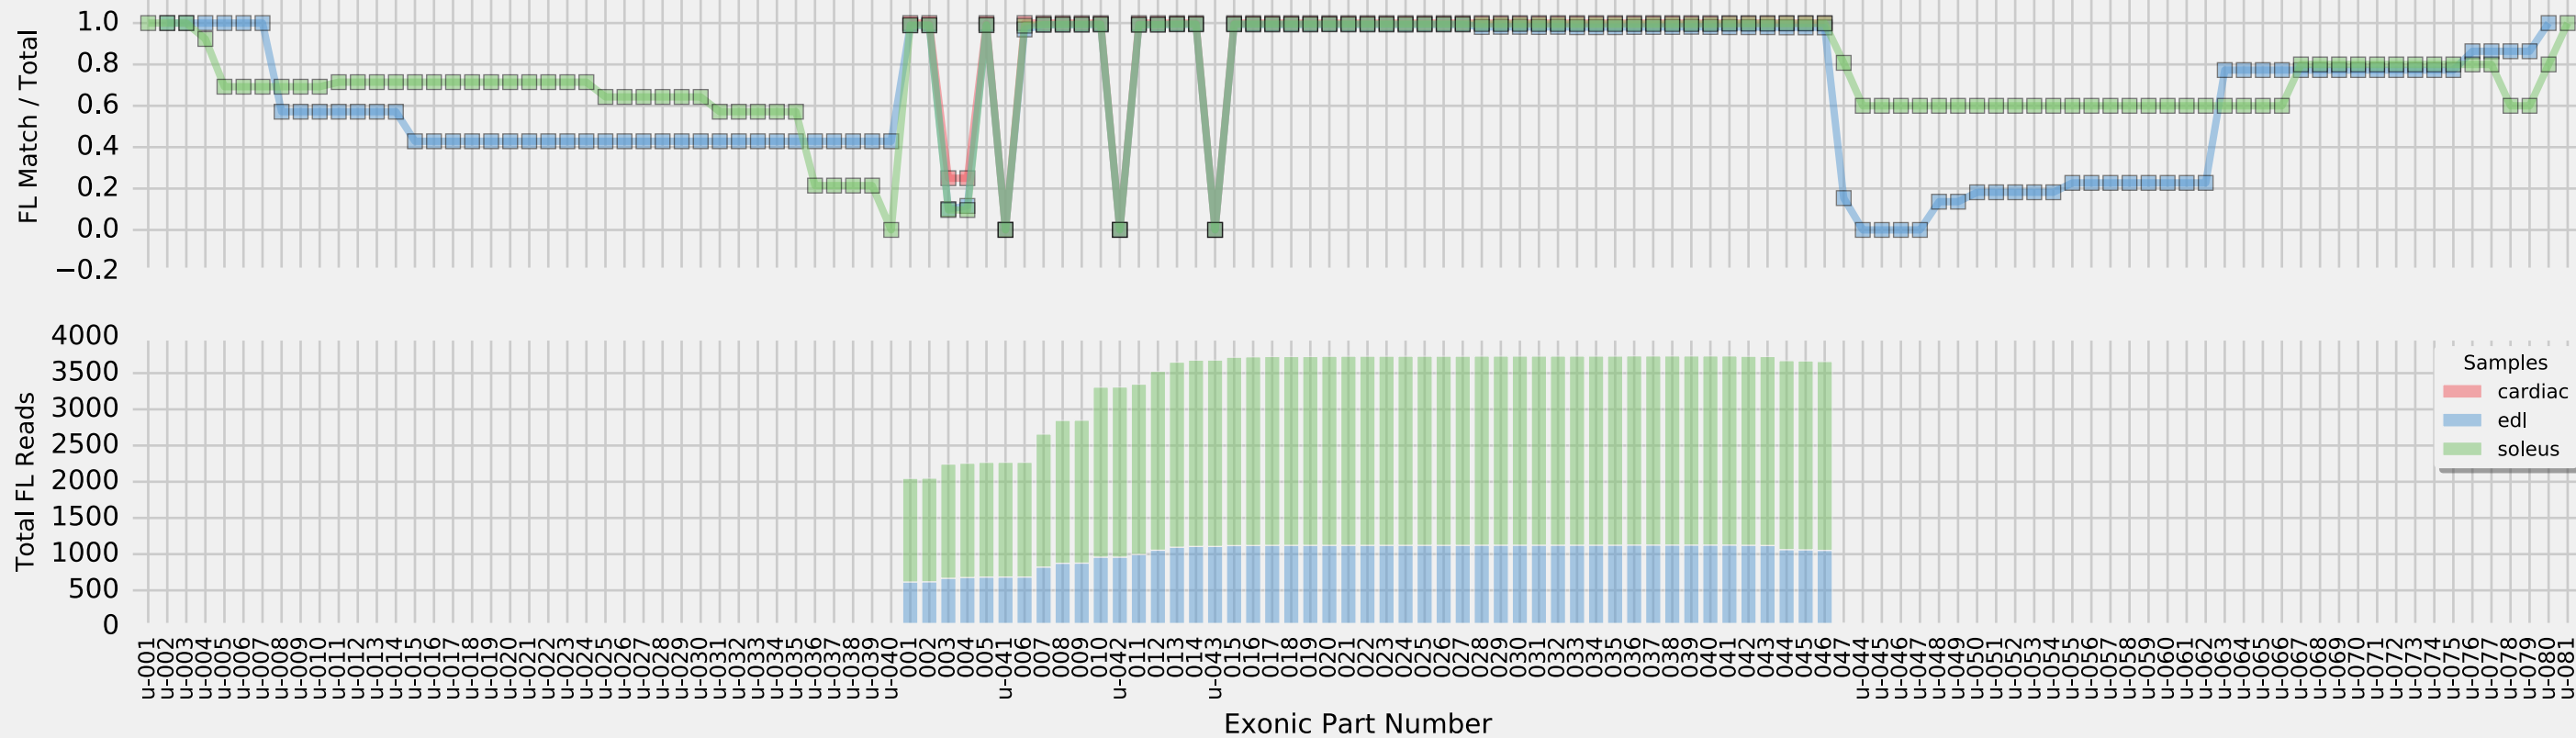

# Myh10

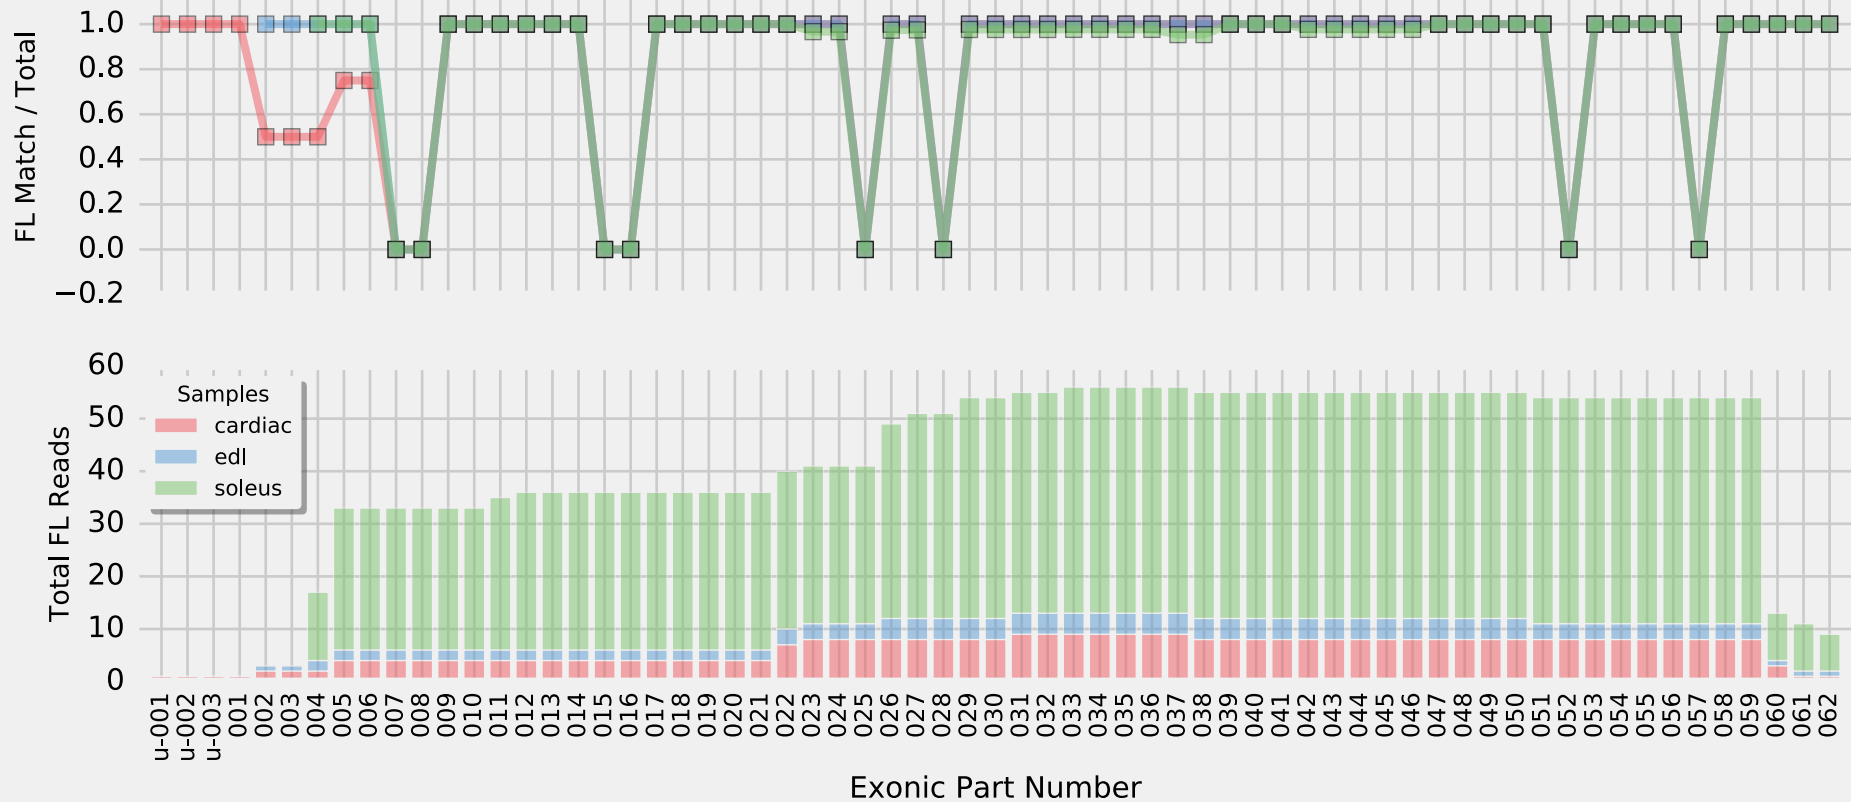

# Myh11

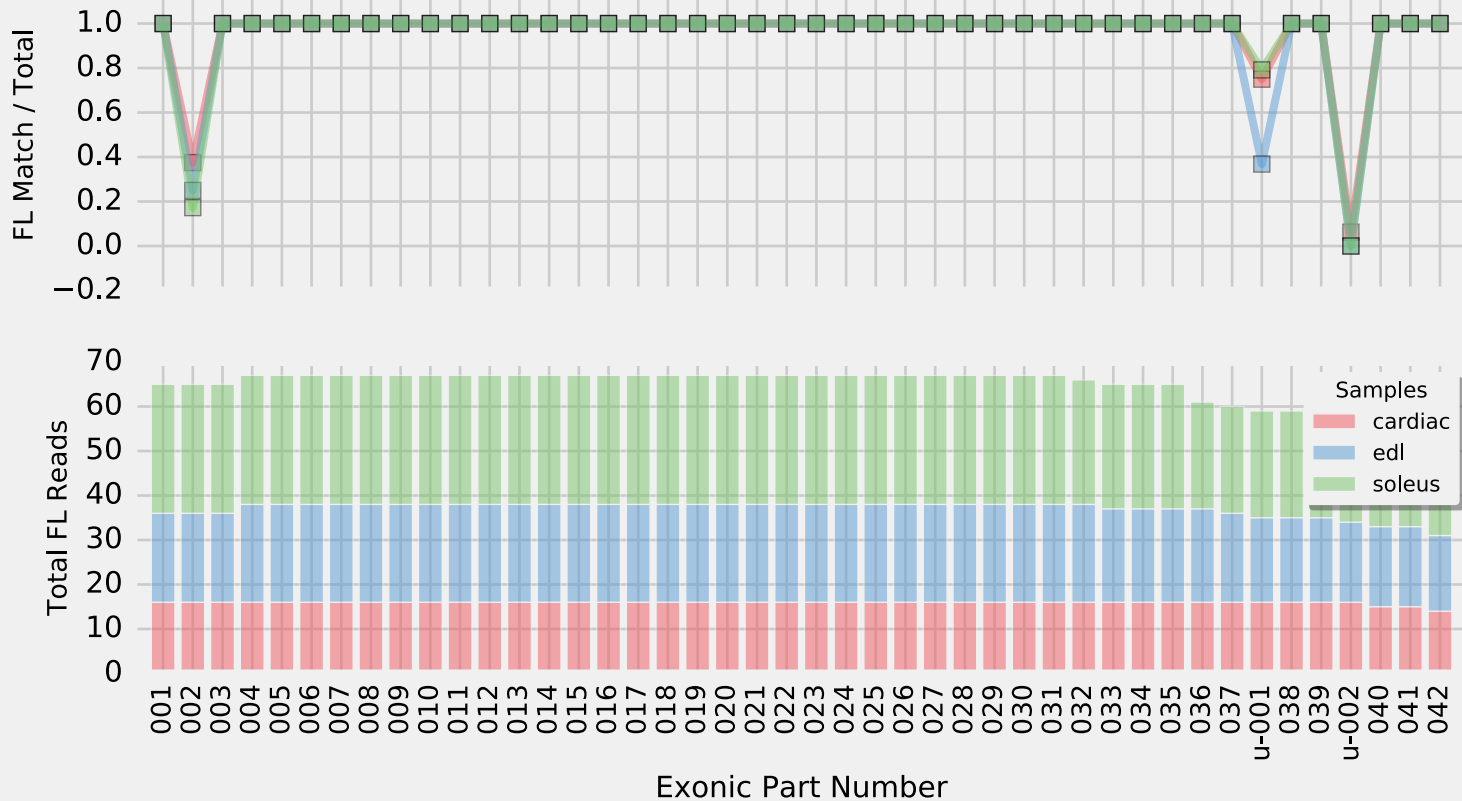

# Myh14

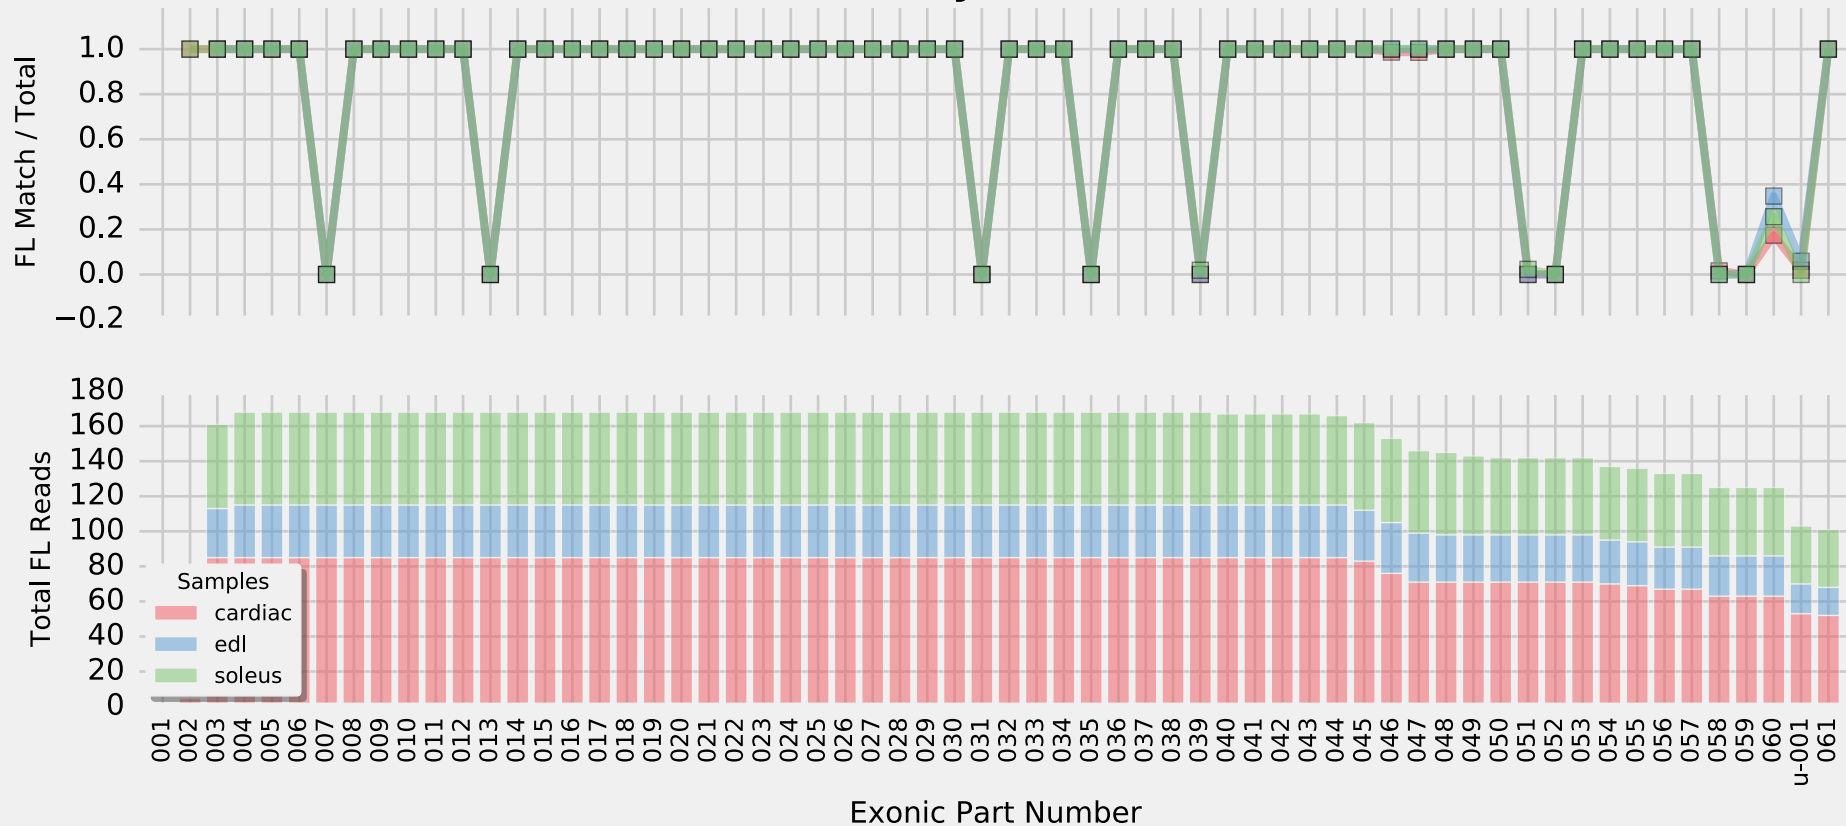

# Myh2

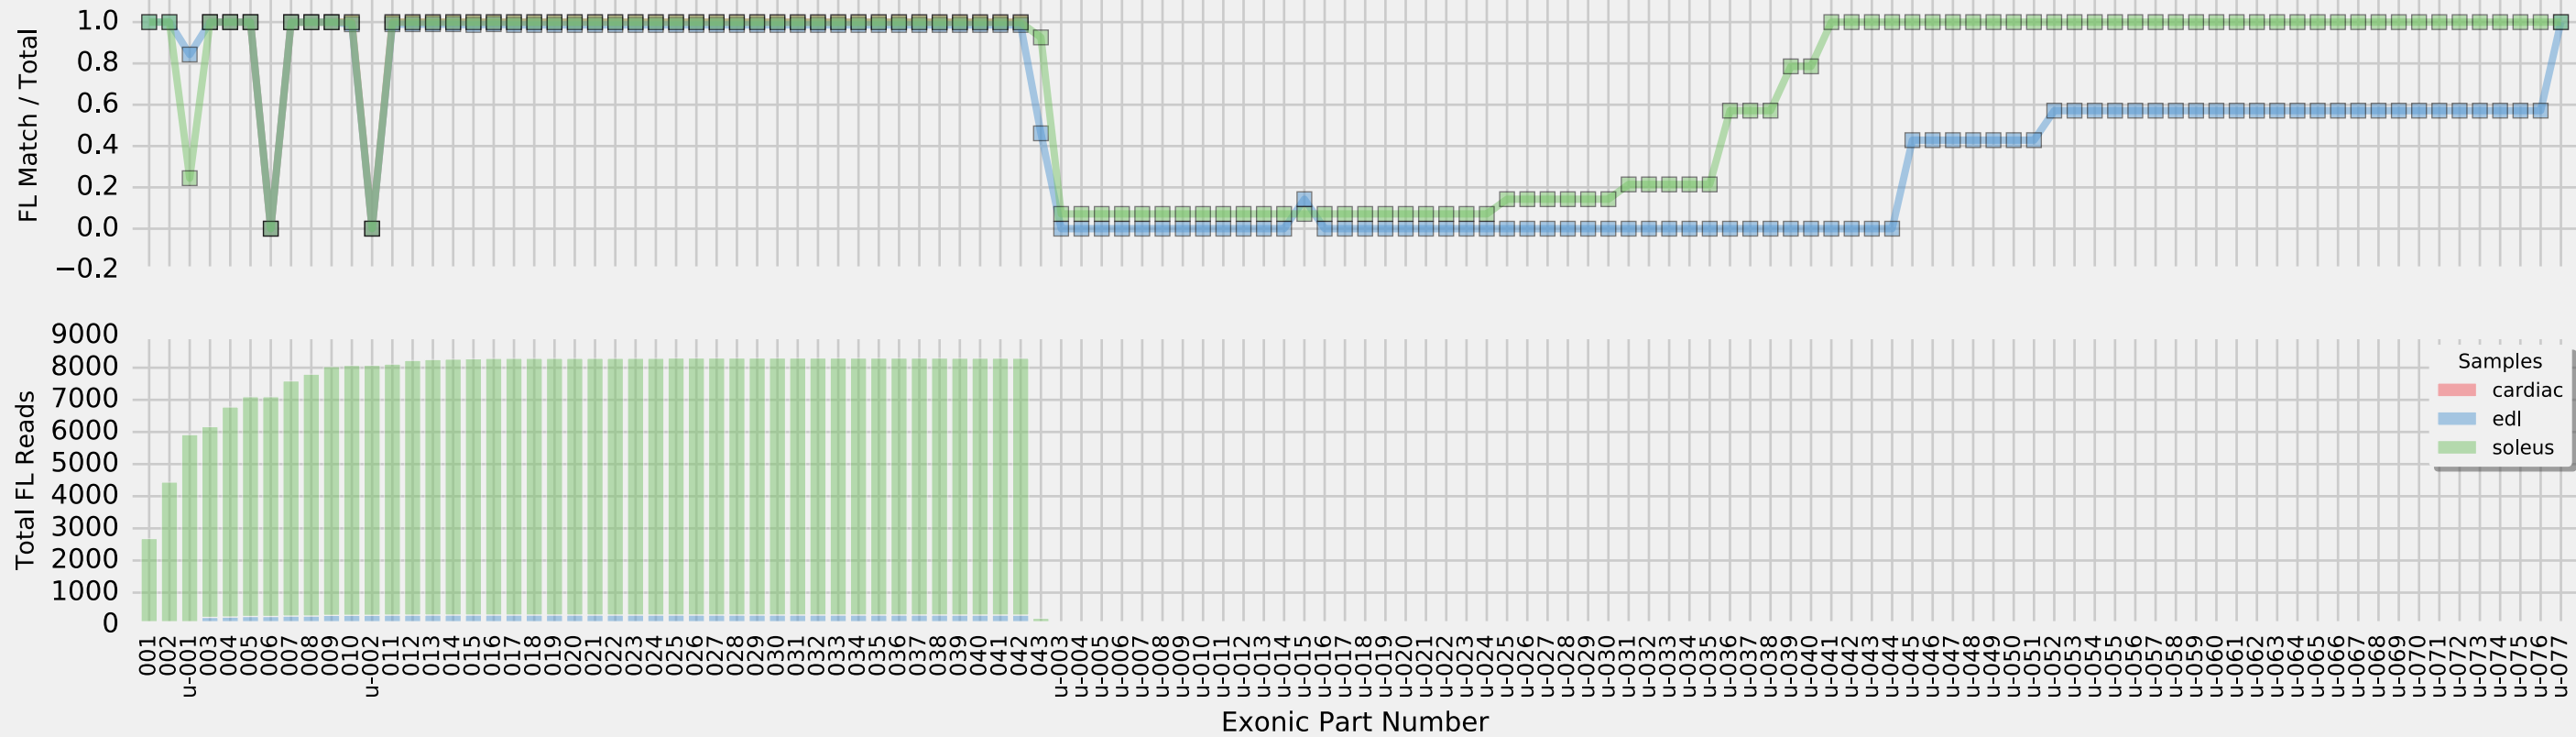

# Myh4

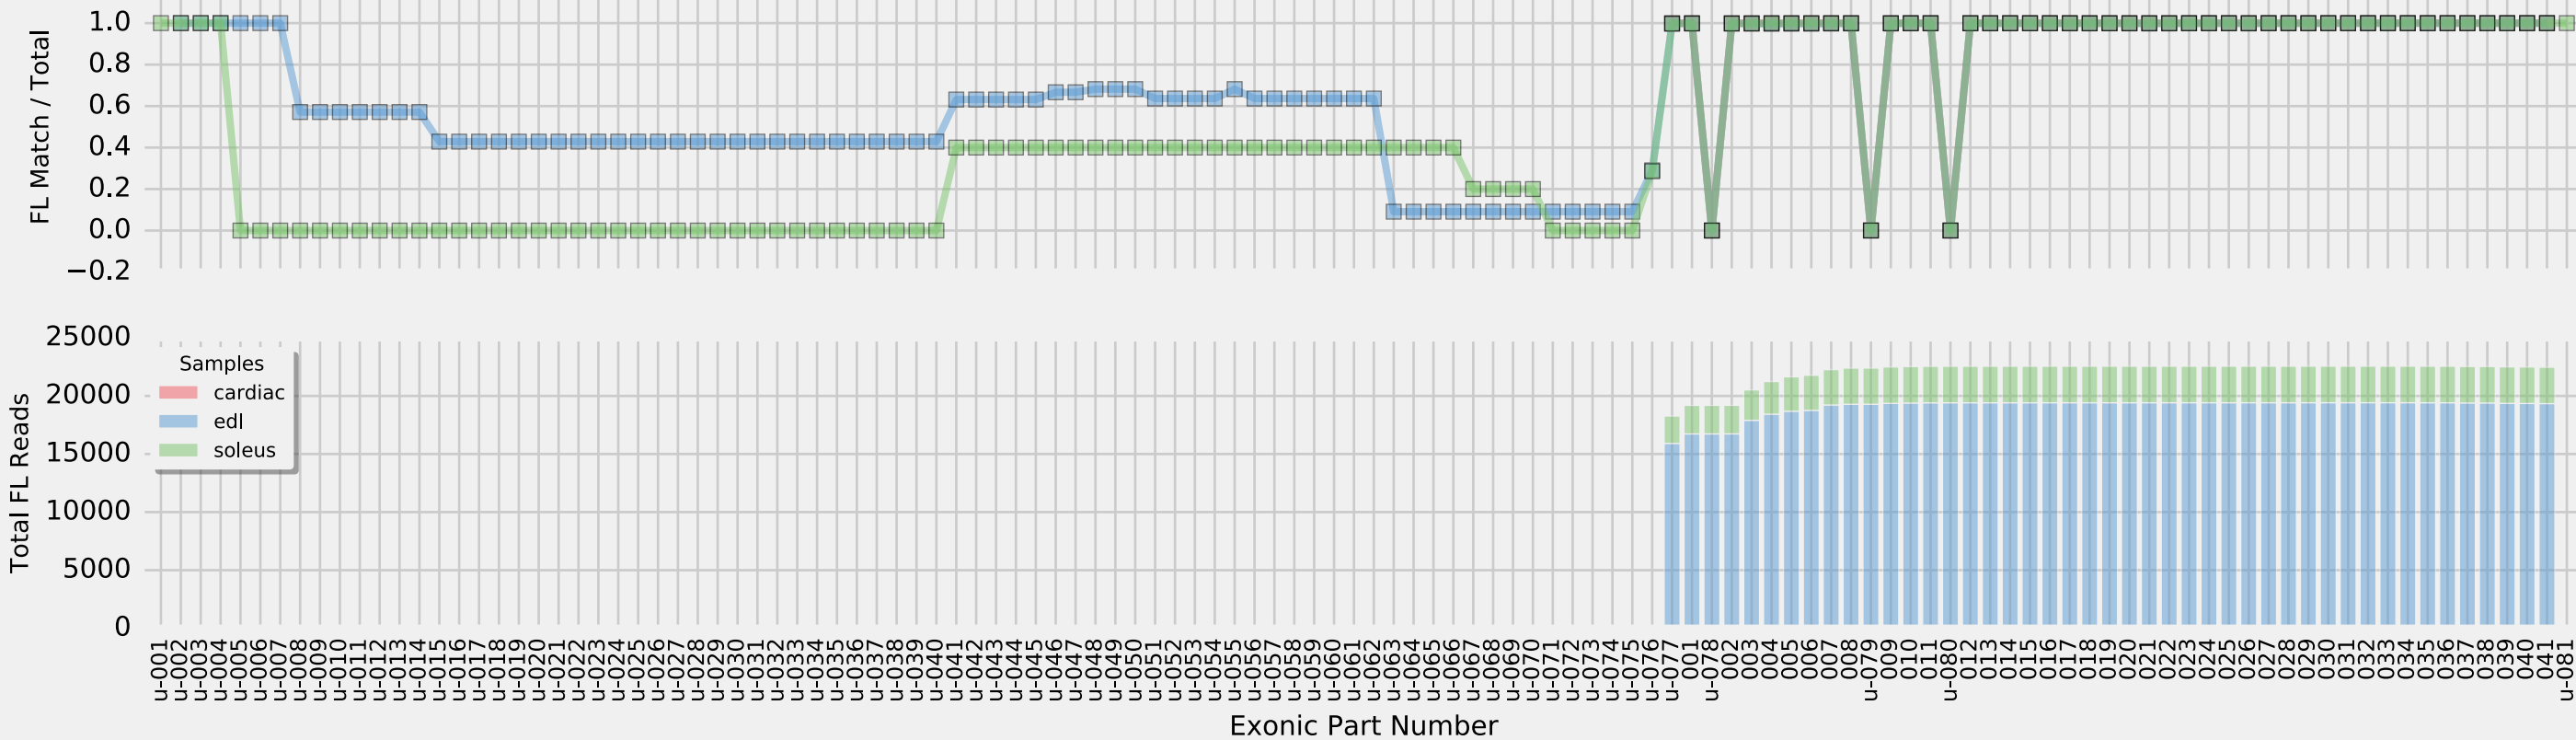



# Myh6

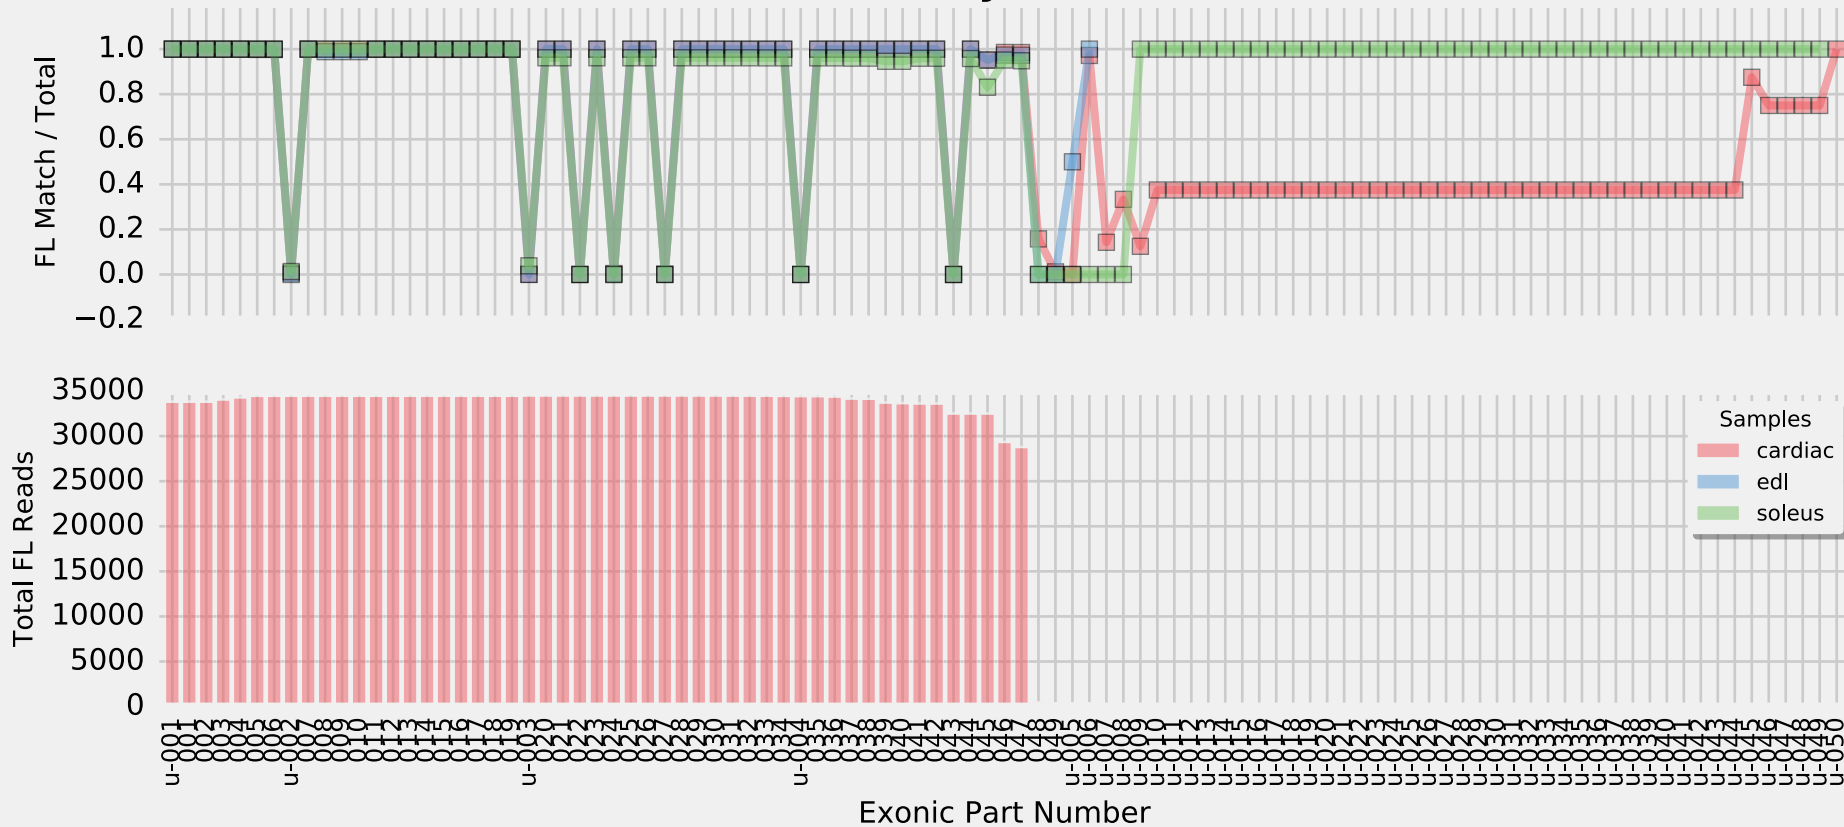

# Myh7

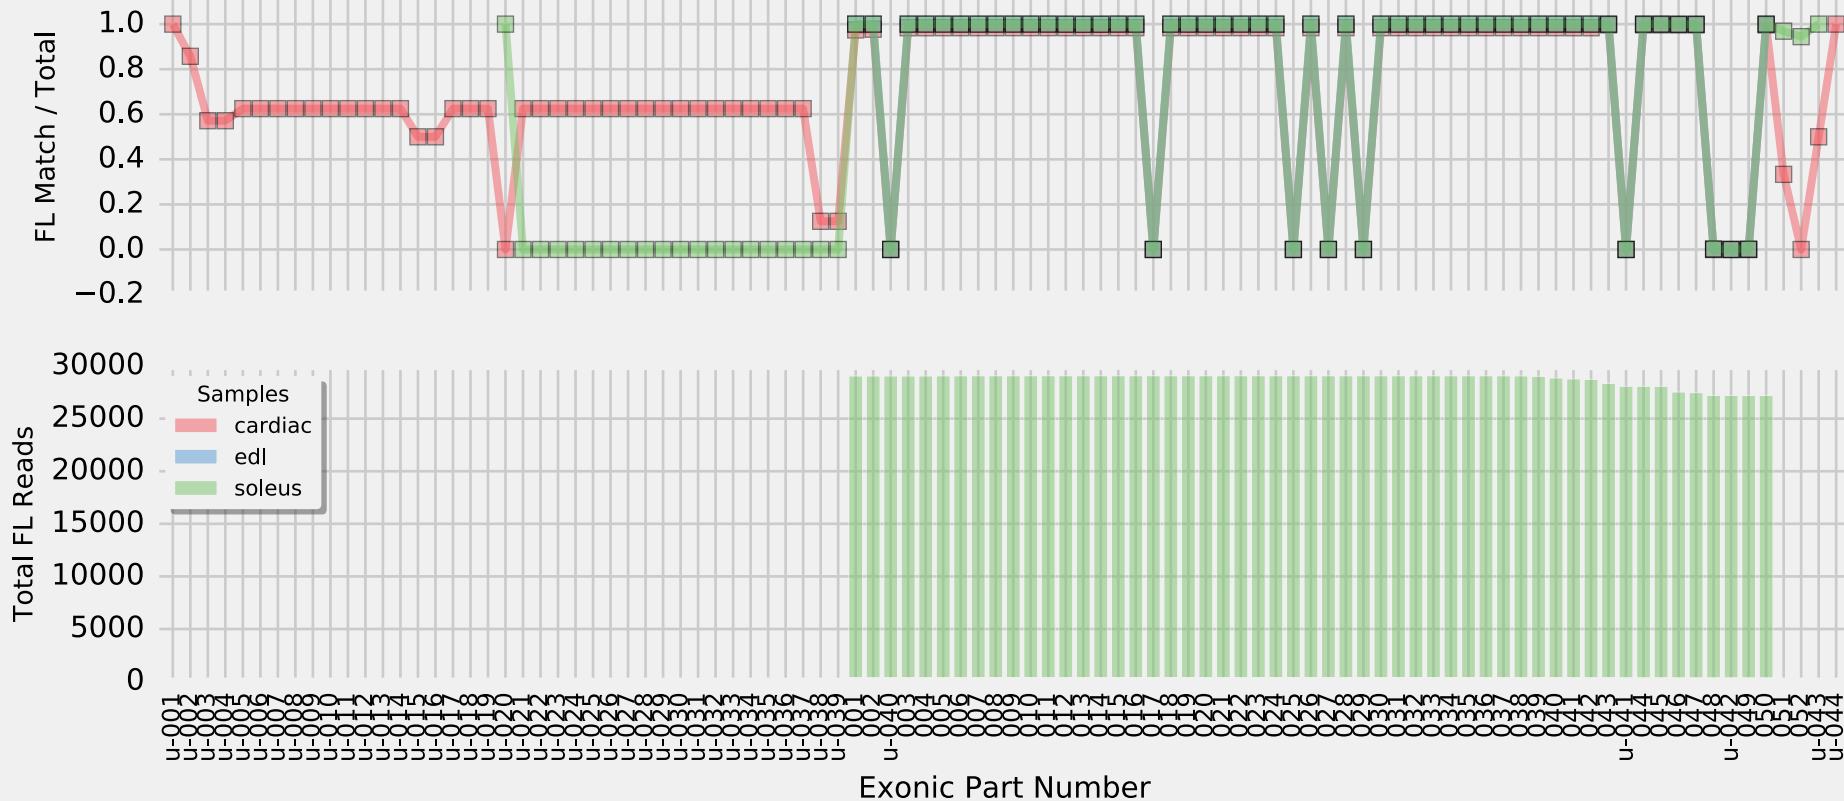

# Myh9

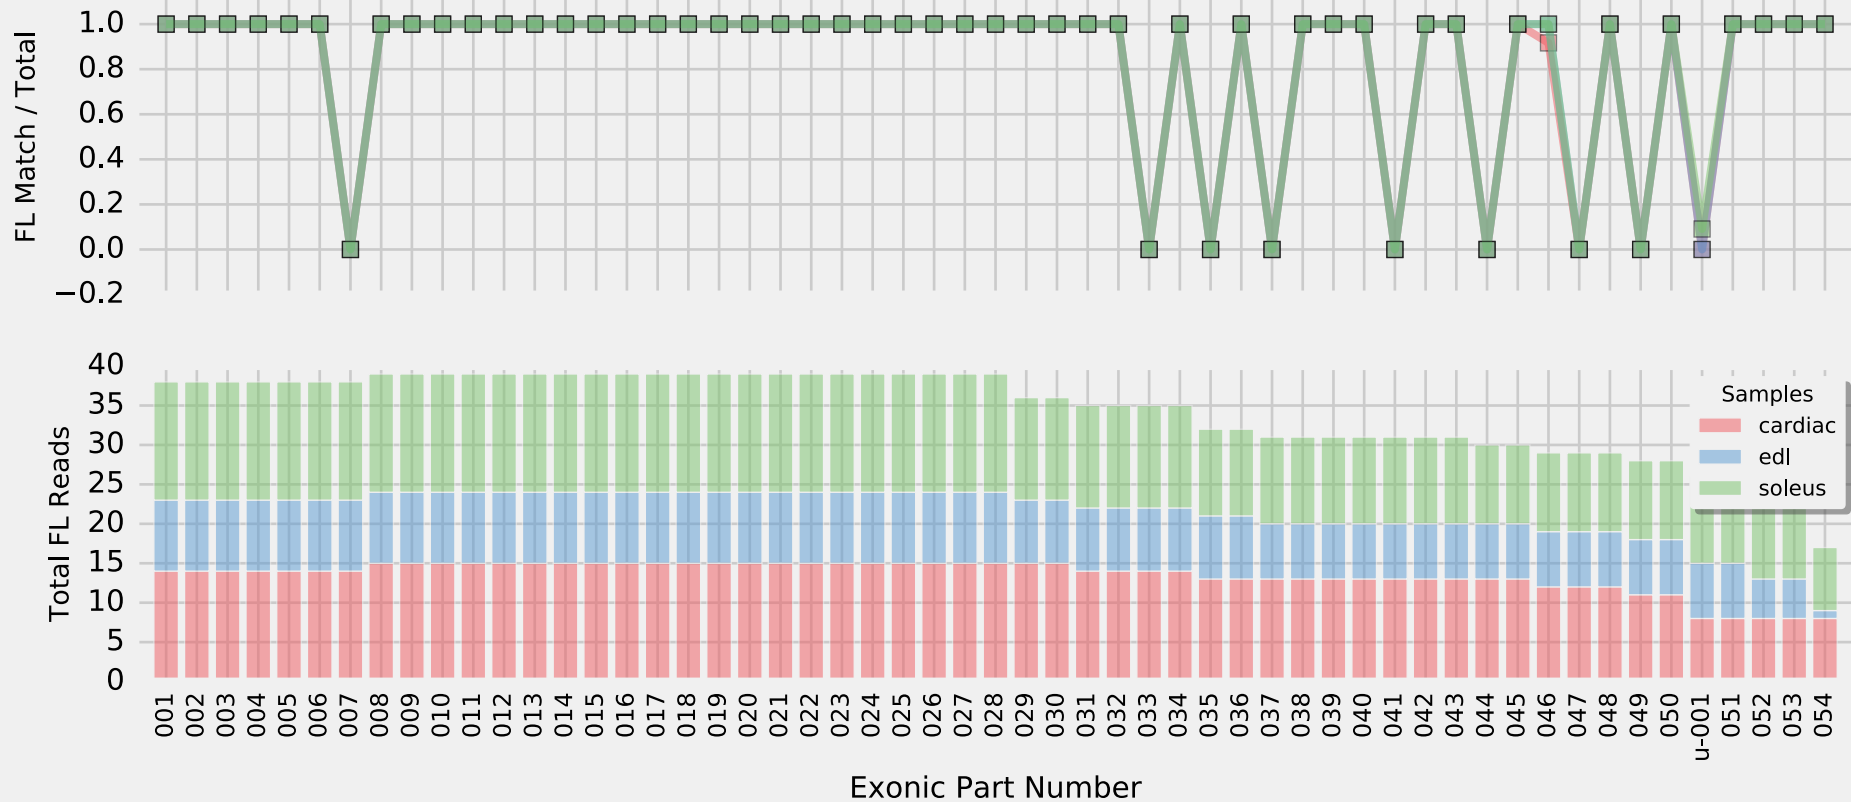

# Myl1

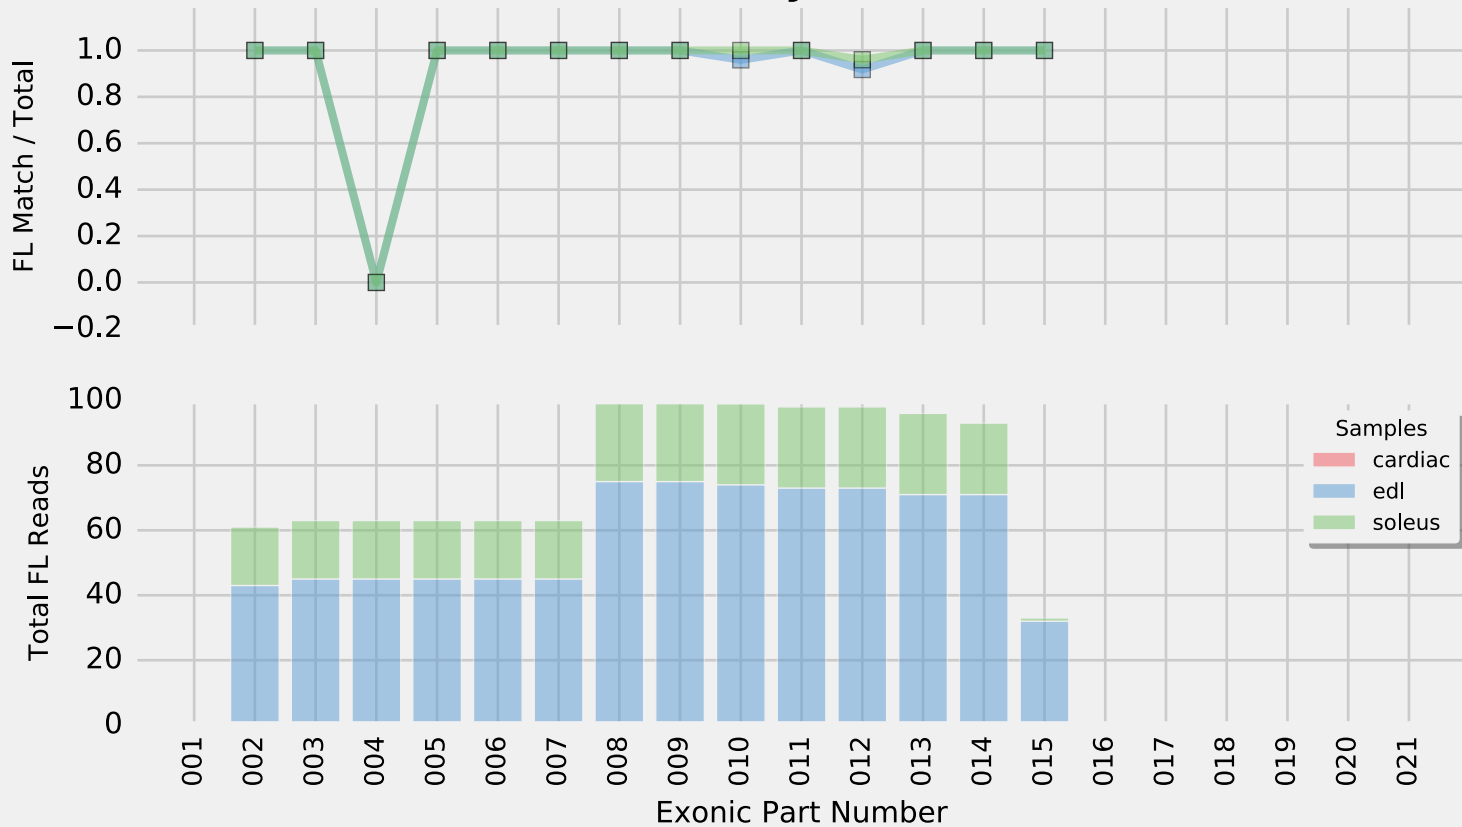

# Mylk4

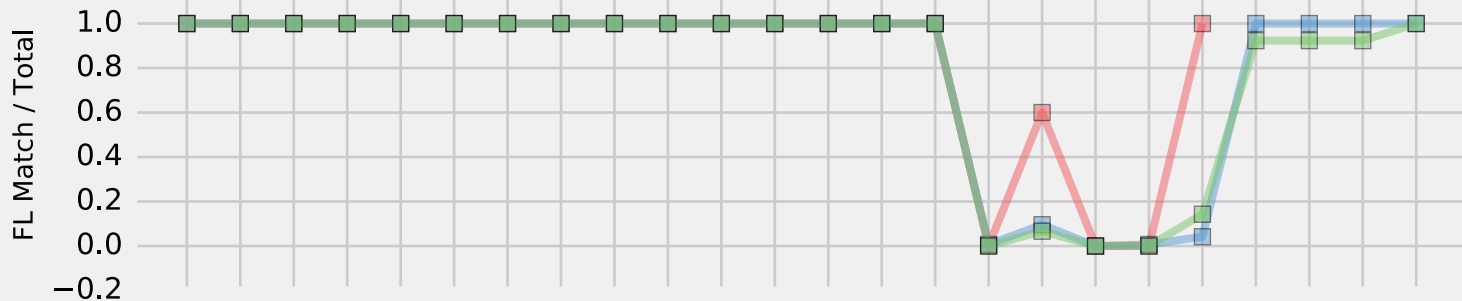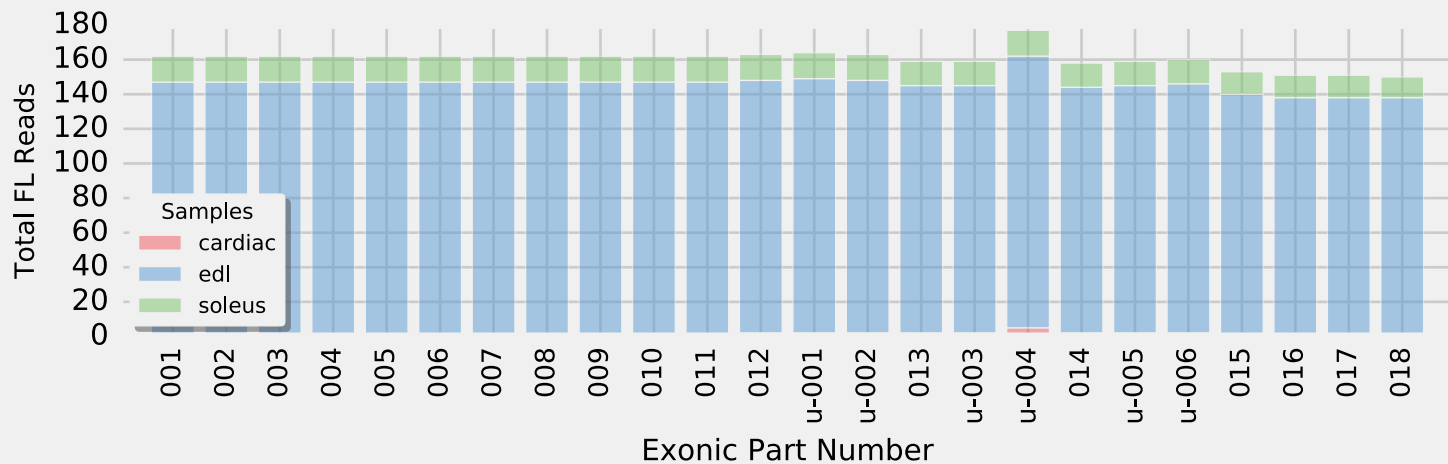

# Myo10

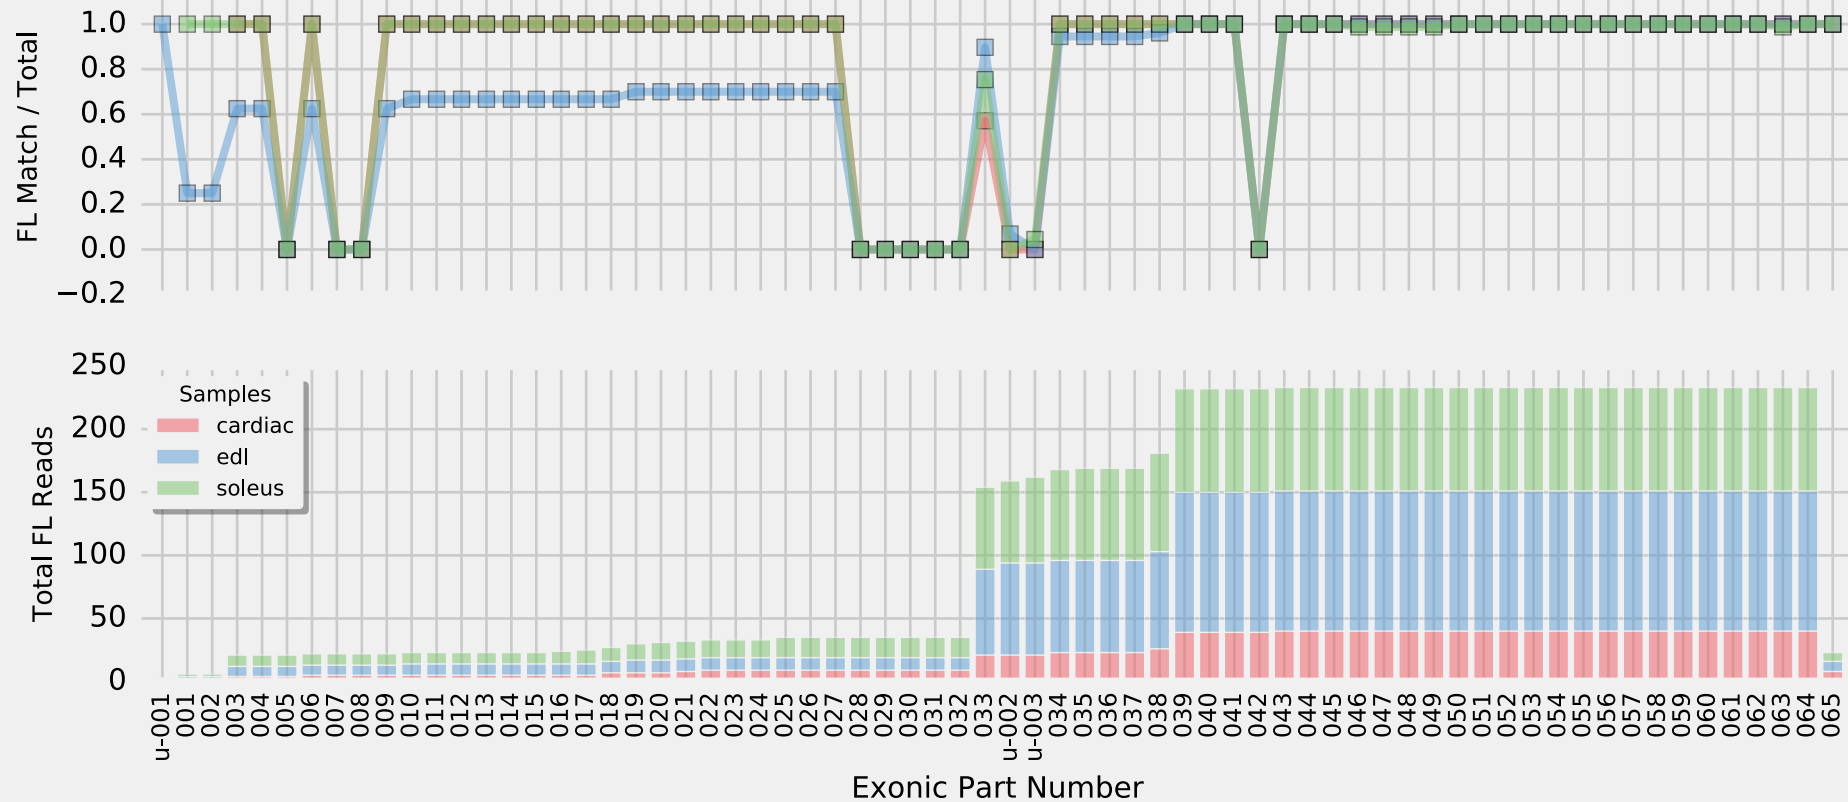

# Myo18a

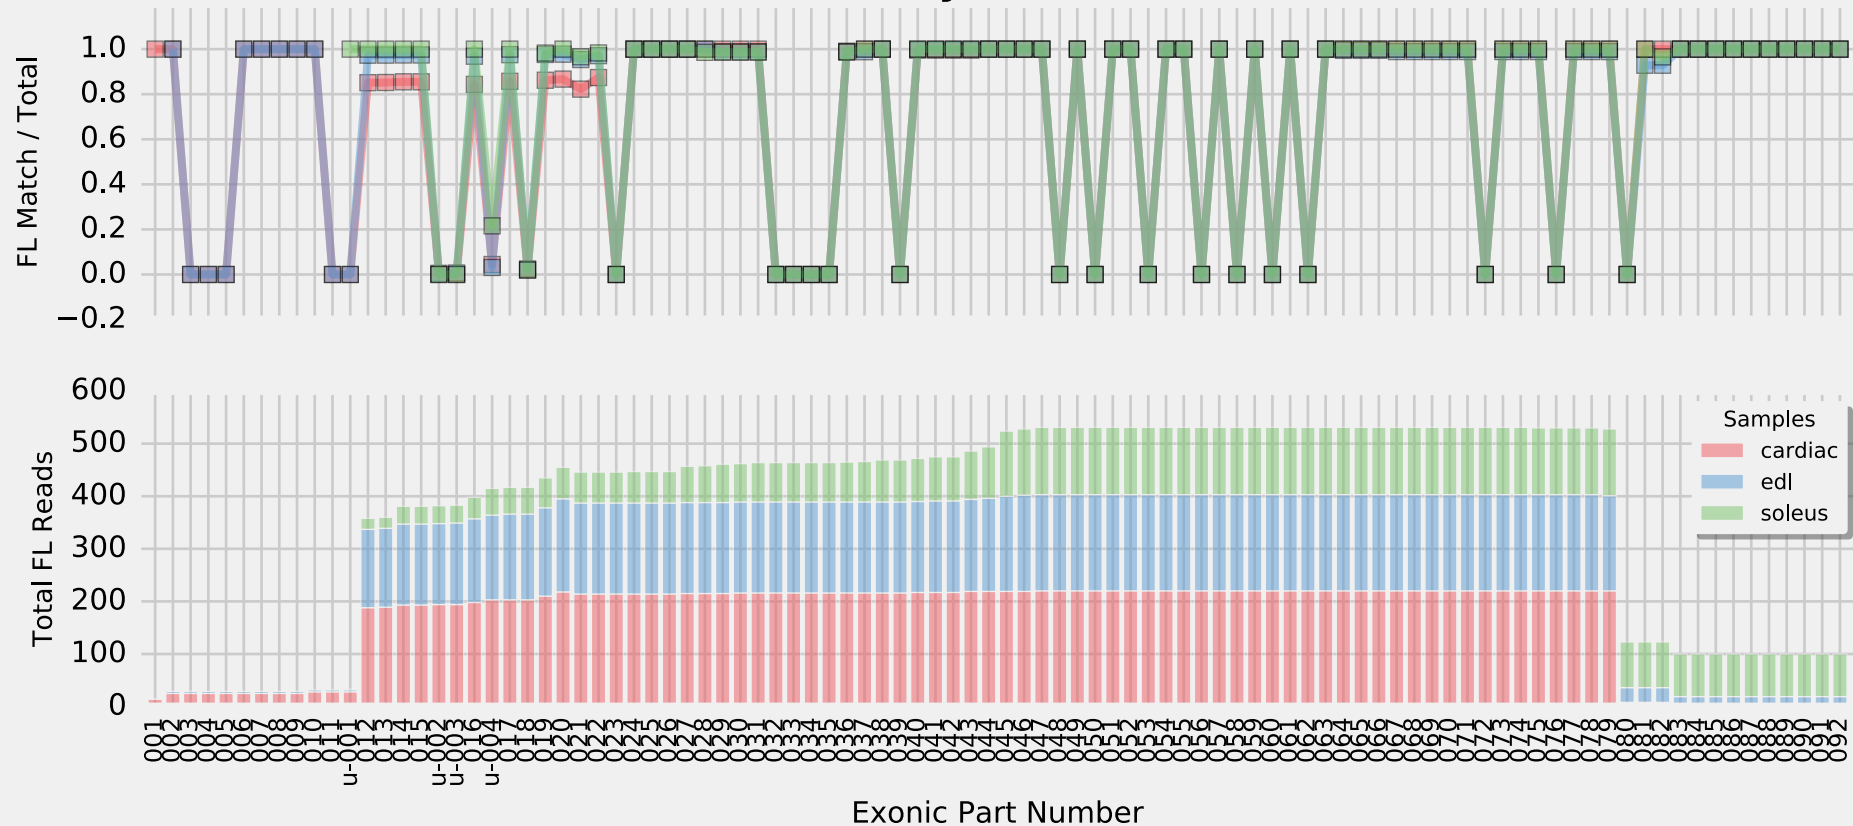

# Myo18b

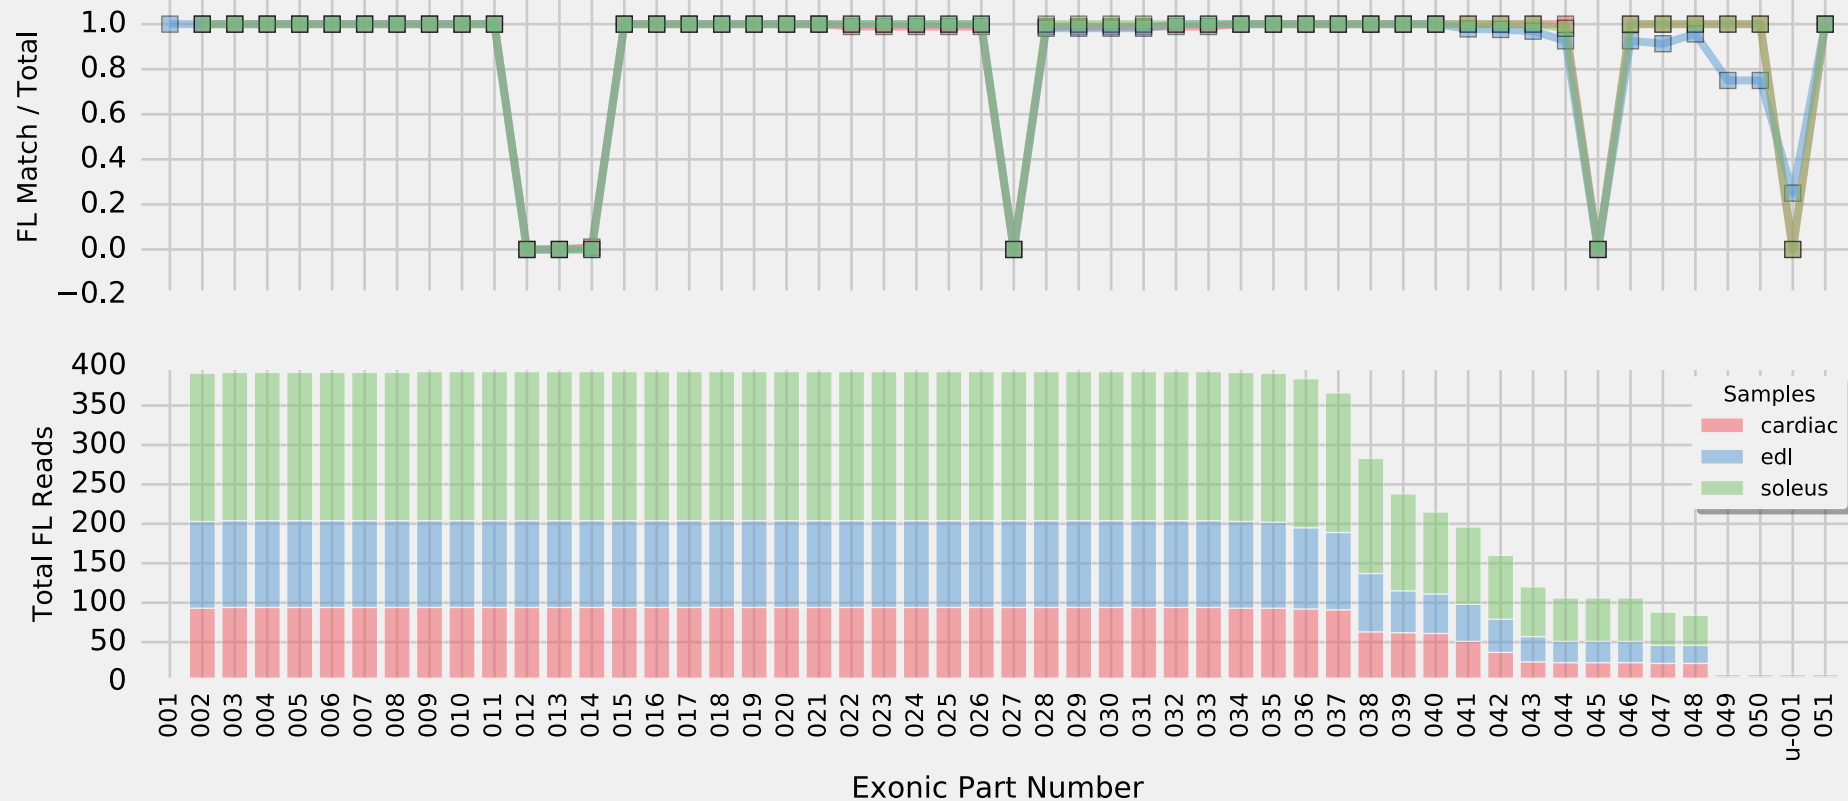



# Myo1c

FL Match / Total

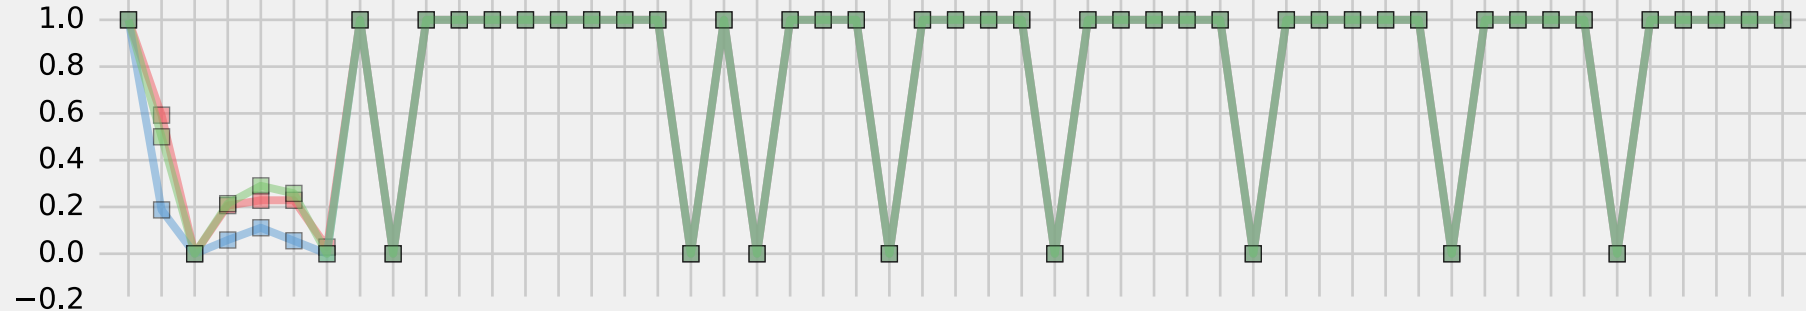

Total FL Reads

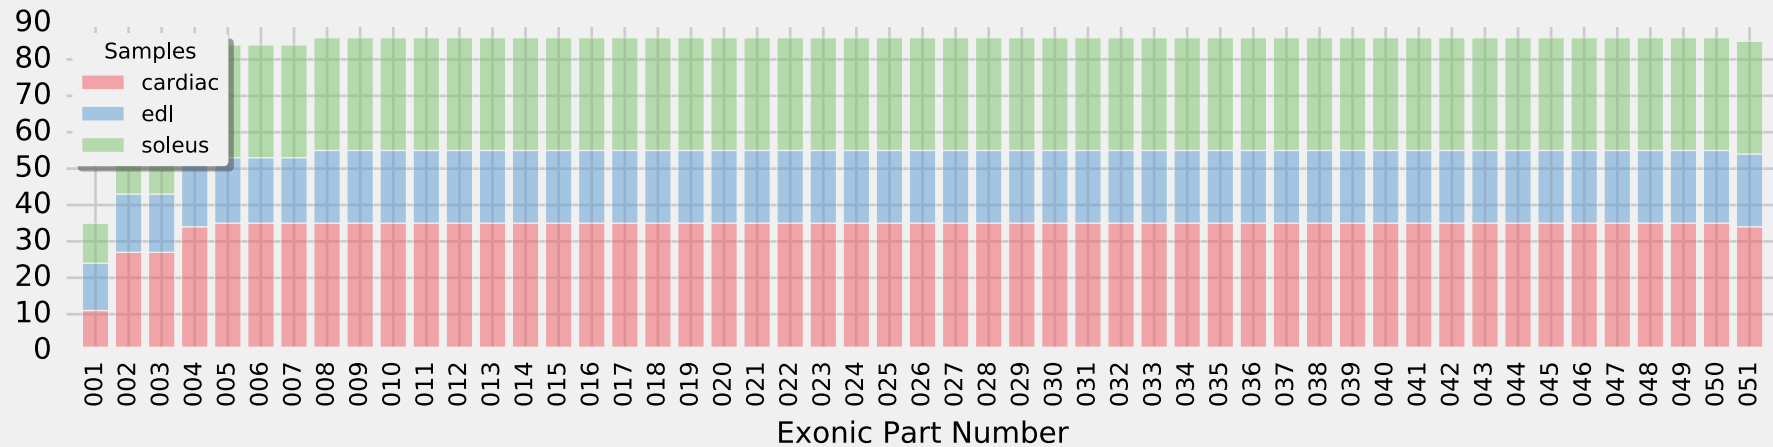

# Myom1

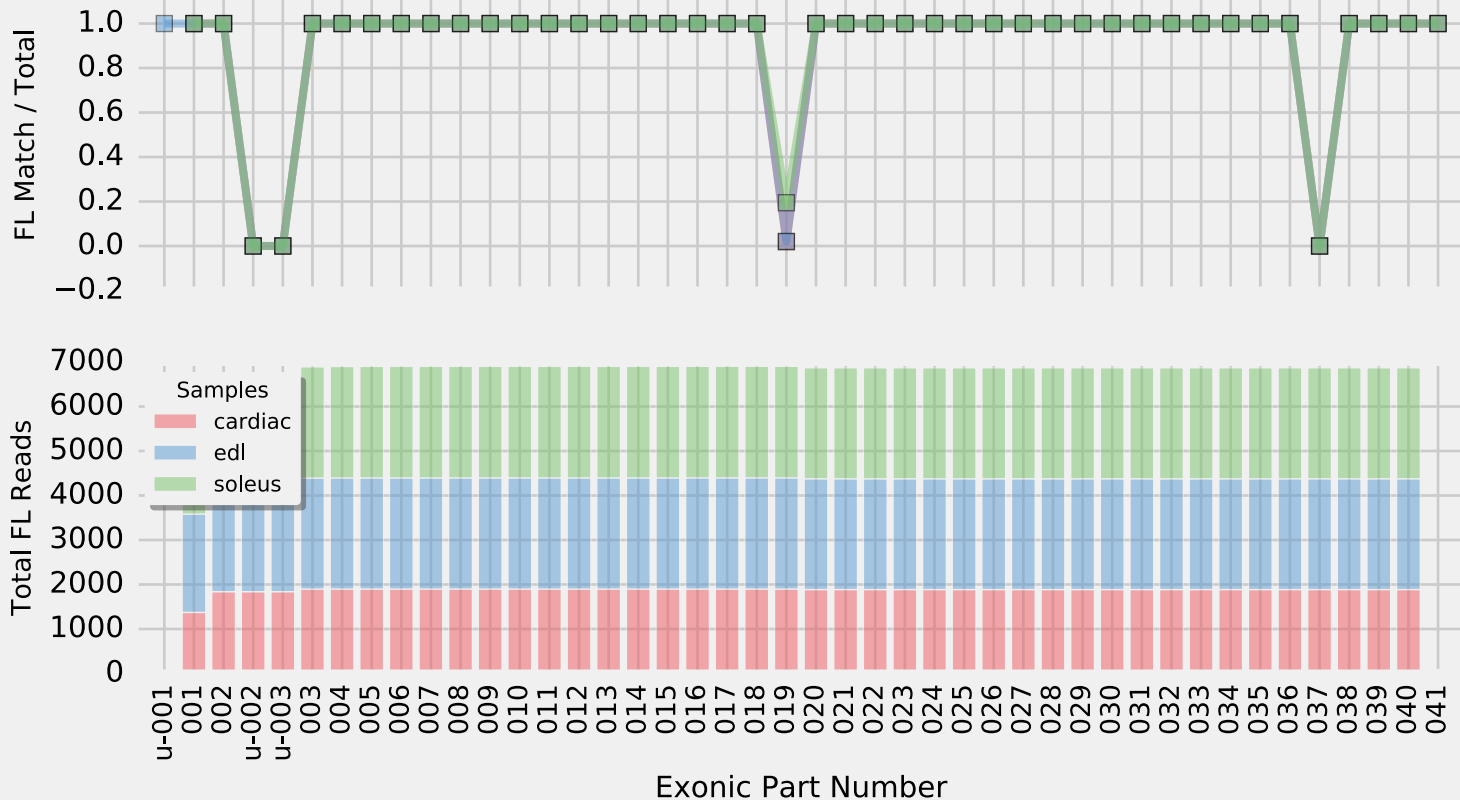

# Myom2

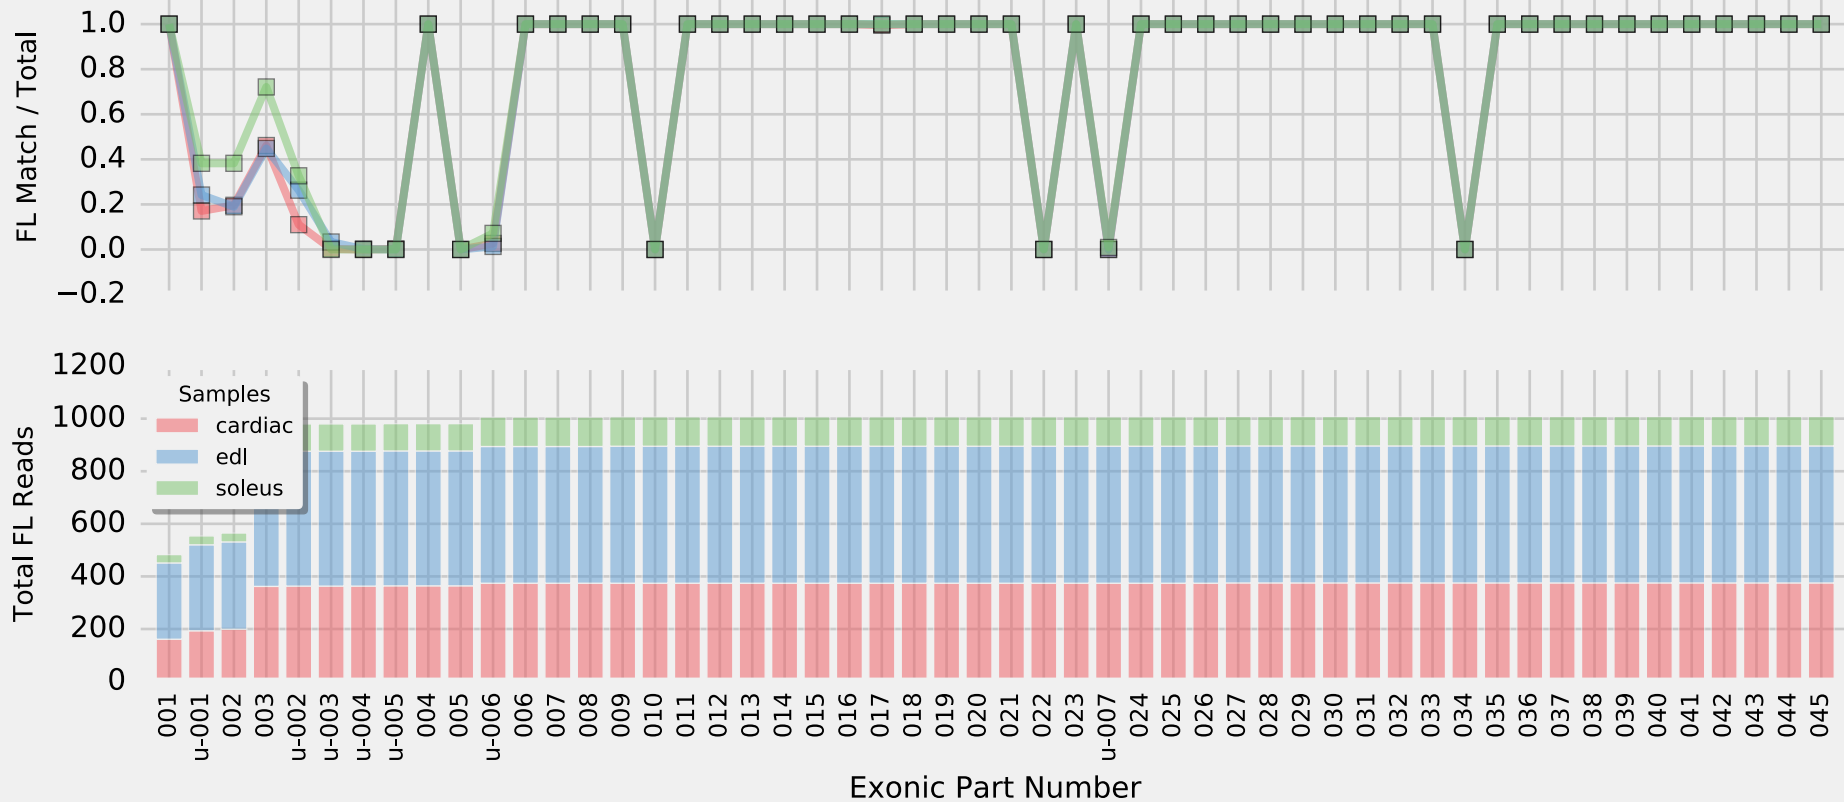

# Myom3

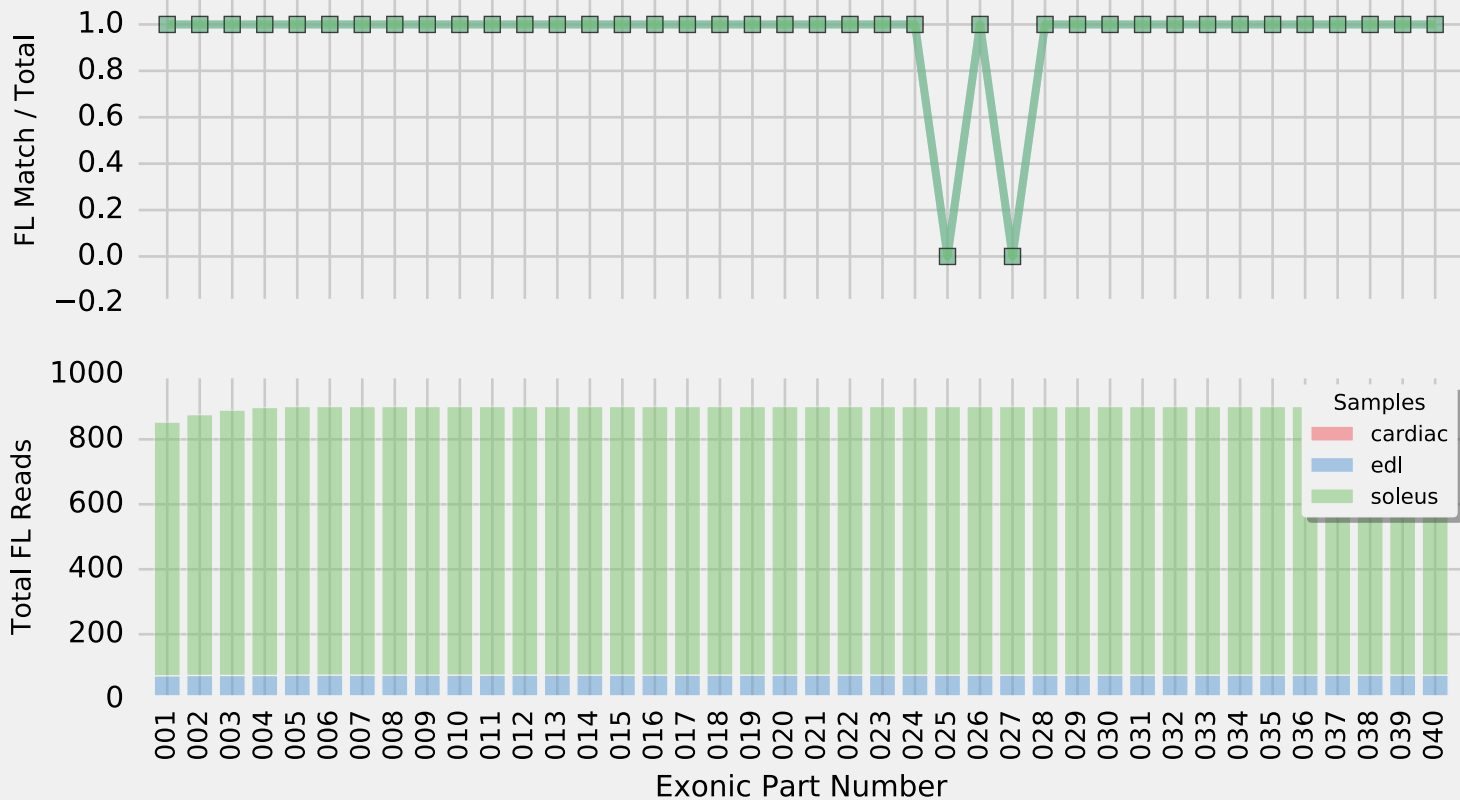

# Mypn

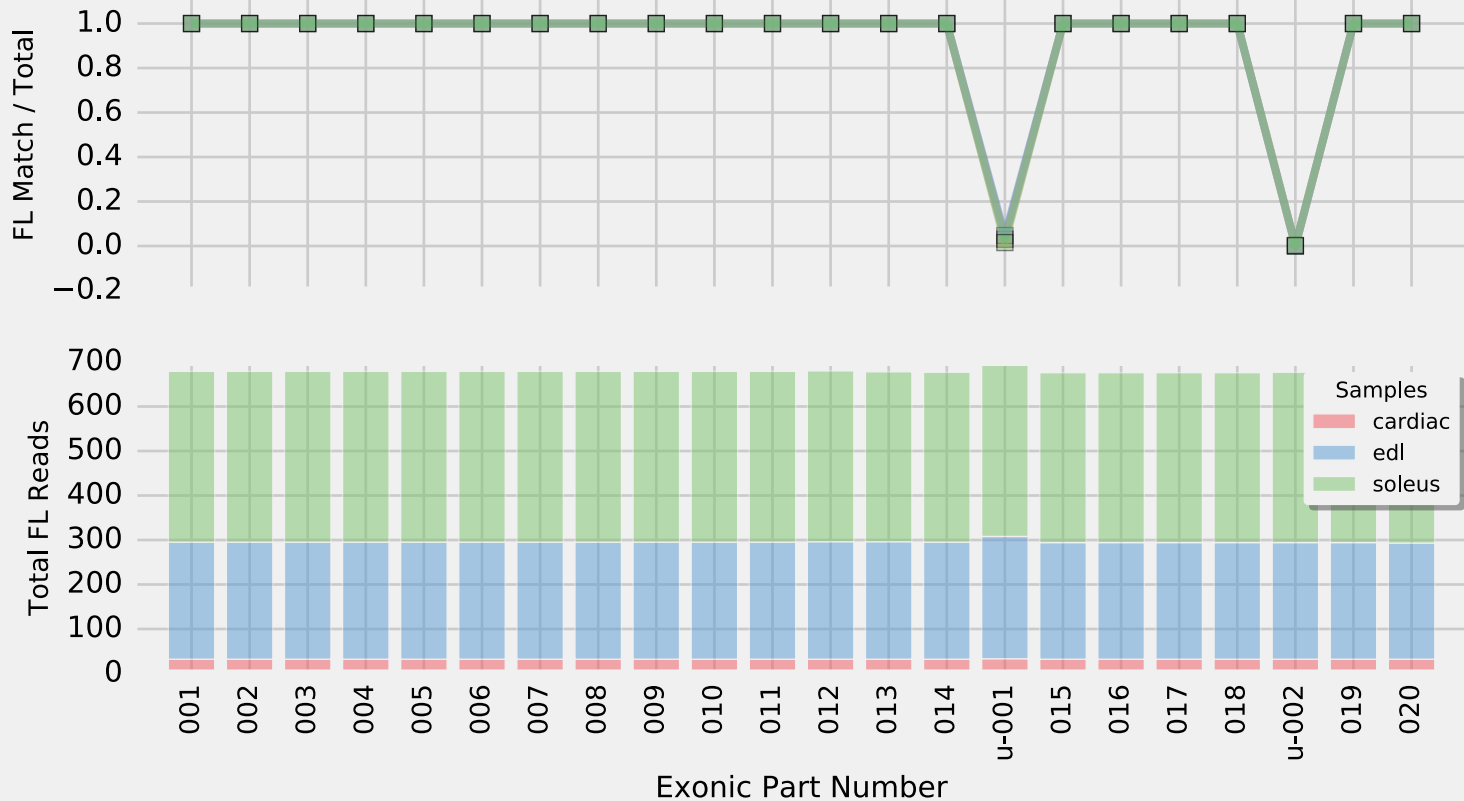

# Naa15

FL Match / Total

1.0  
0.8  
0.6  
0.4  
0.2  
0.0  
-0.2

Total FL Reads

70  
60  
50  
40  
30  
20  
10  
0

Samples

cardiac  
edl  
soleus

Exonic Part Number

001 002 003 004 005 006 007 008 009 010 011 012 013 014 015 016 017 018 019 020 021 022 023 024 025 026 027 028 029 030 031 032 033 034 035 036 037 038 039 040

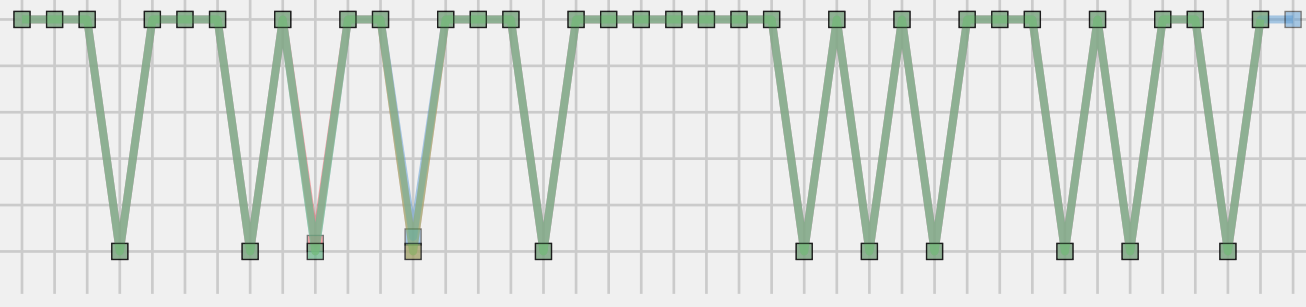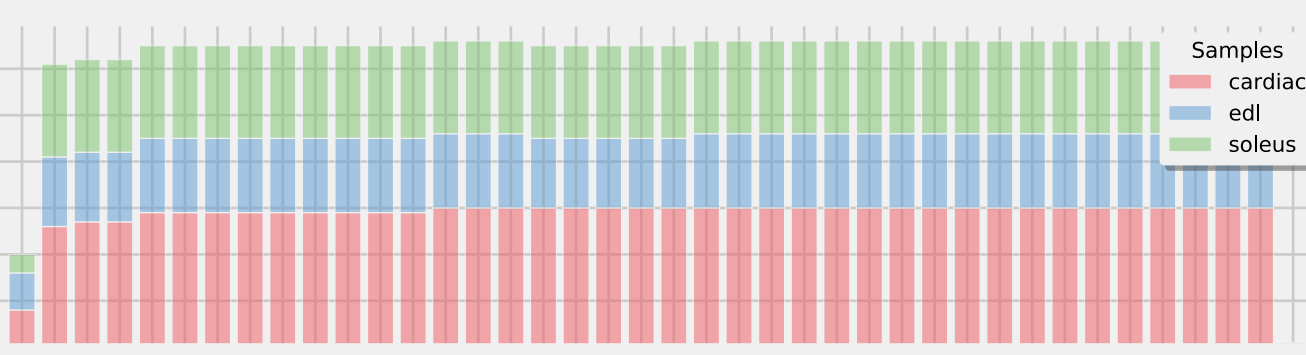

# Naa25

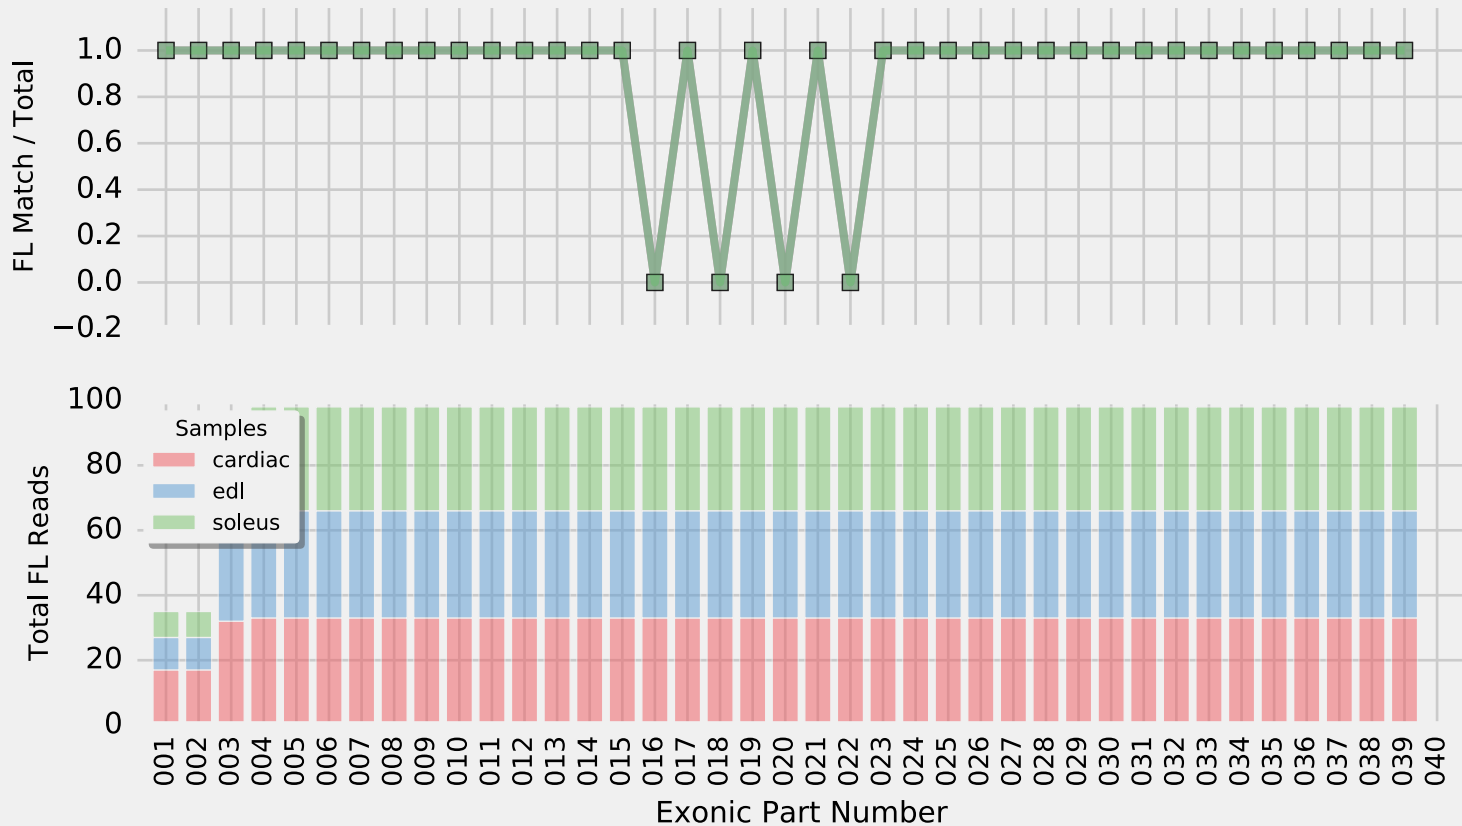

# Nbas

FL Match / Total

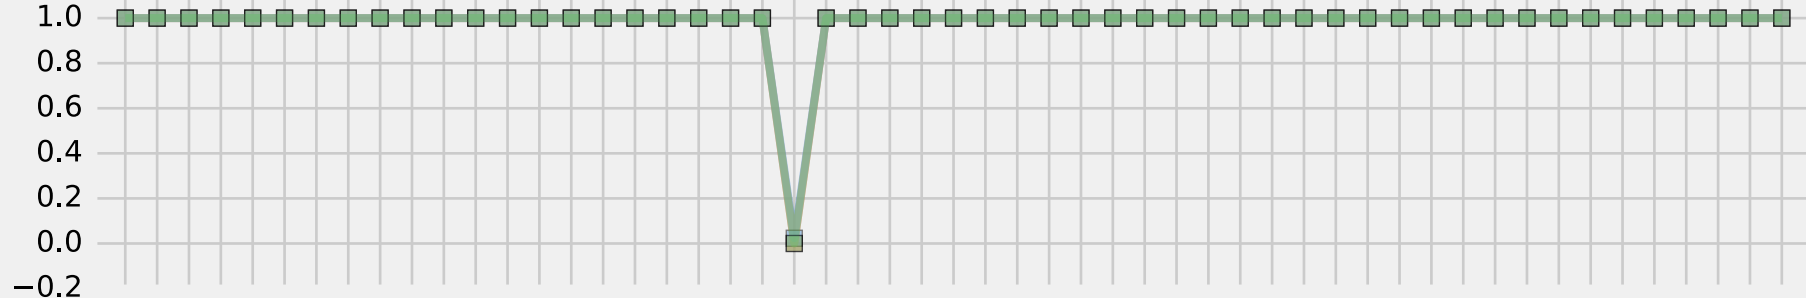

Total FL Reads

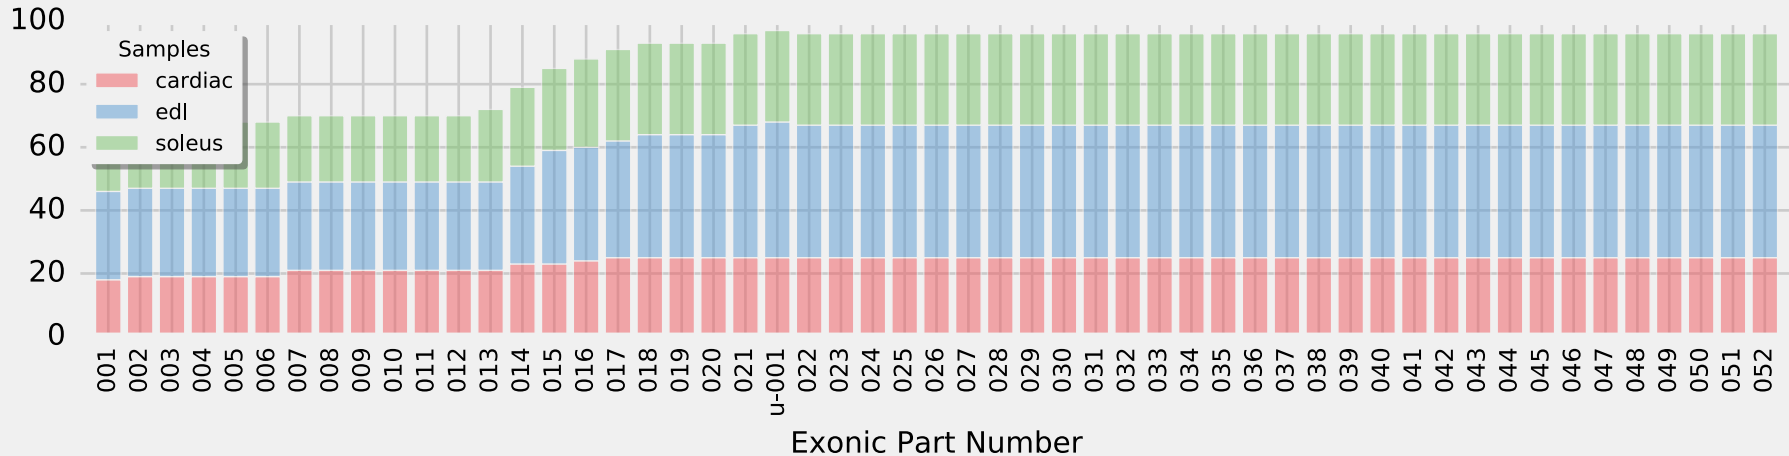



# Nbeal1

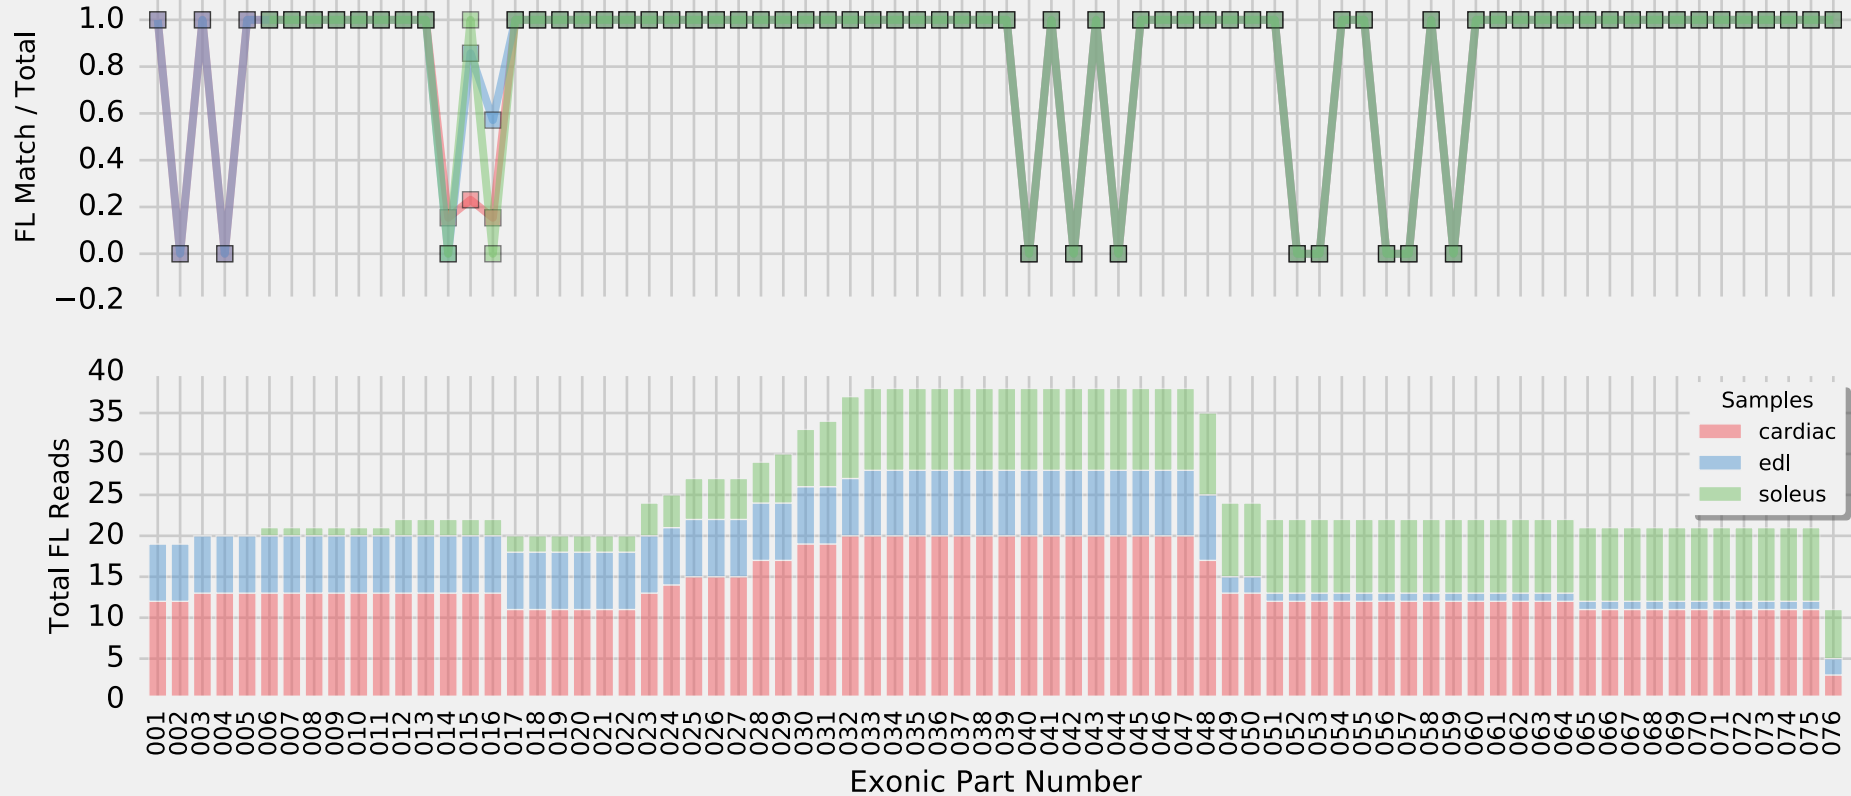

# Ncapd3

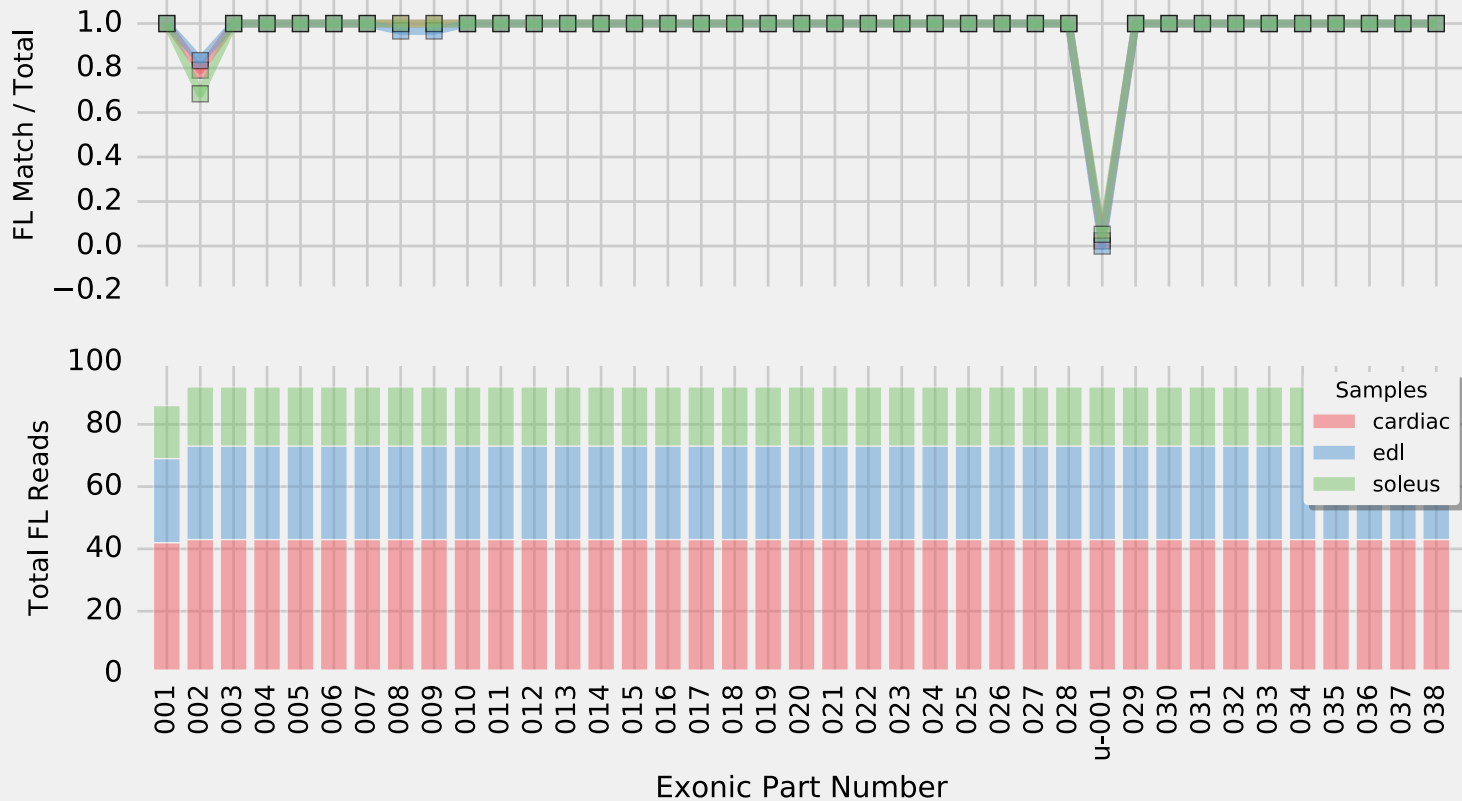

# Ncor1

FL Match / Total

1.0  
0.8  
0.6  
0.4  
0.2  
0.0  
-0.2

Total FL Reads

45  
40  
35  
30  
25  
20  
15  
10  
5  
0

Samples

cardiac  
edl  
soleus

Exonic Part Number

001 002 003 004 005 006 007 008 009 010 011 012 013 014 015 016 017 018 019 020 021 022 023 024 025 026 027 028 029 030 031 032 033 034 035 036 037 038 039 040 041 042 043 044 045 046 047 048 049 050 051 052 053 054 055 056 057 058 059 060 061 062 063 064 065 066 067 068 069 070 071 072 073 074 075 076 077 078 079 080 081 082 083 084 085 086 087 088 089 090 091 092 093 094 095 096 097 098 099 100

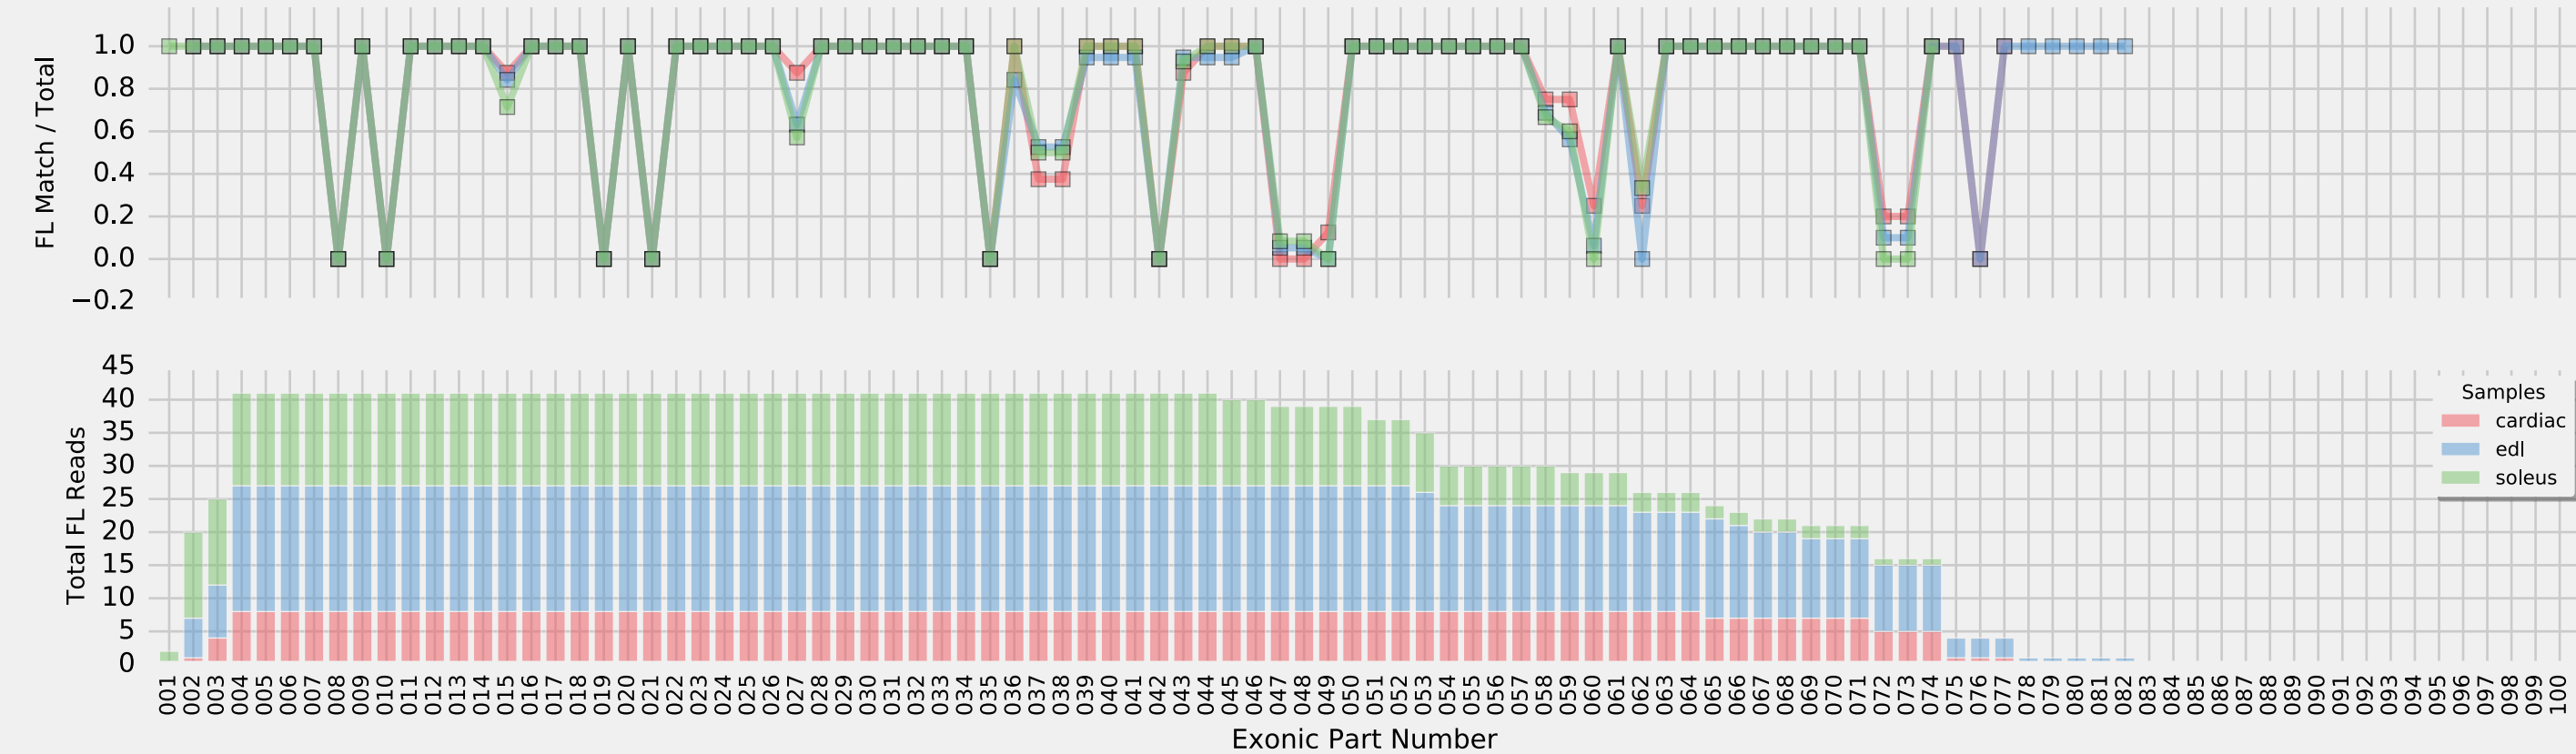

# Neat1

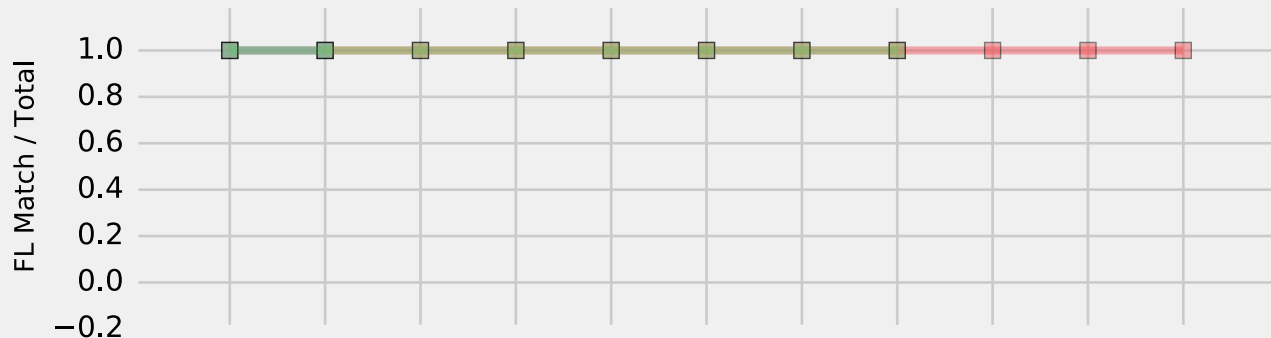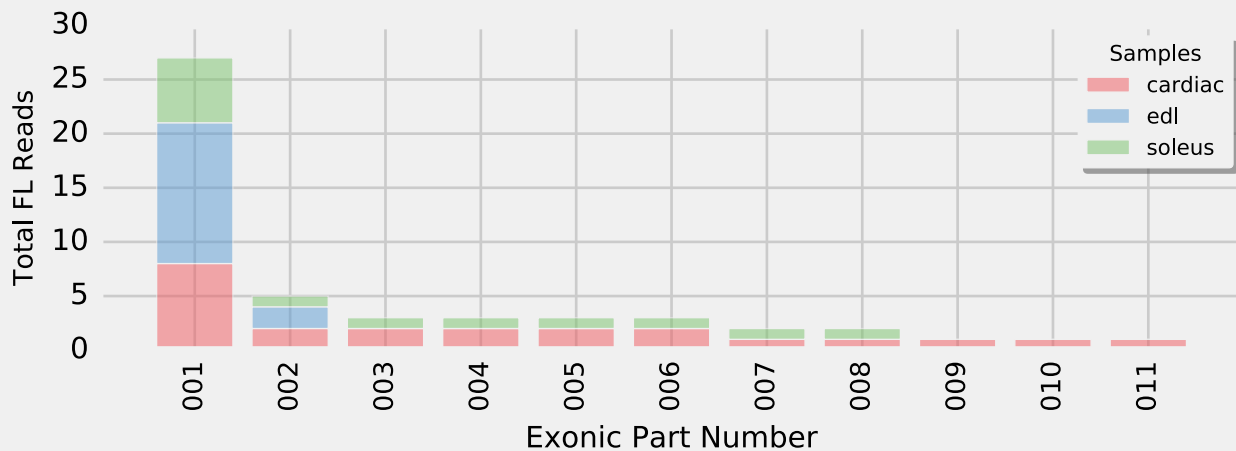

# Neb

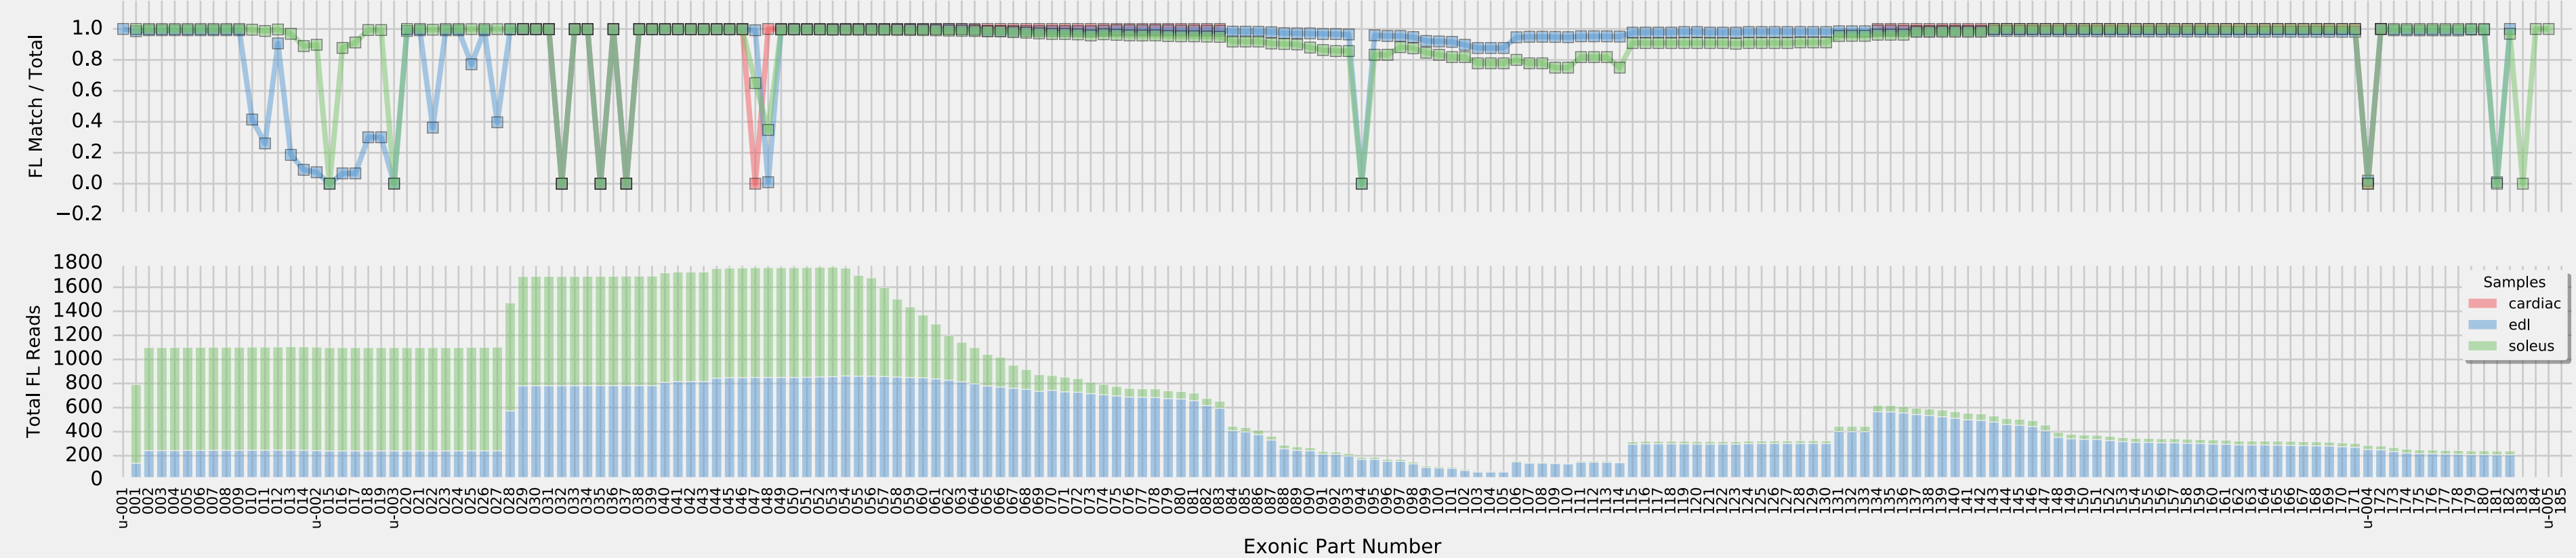

# Nebl

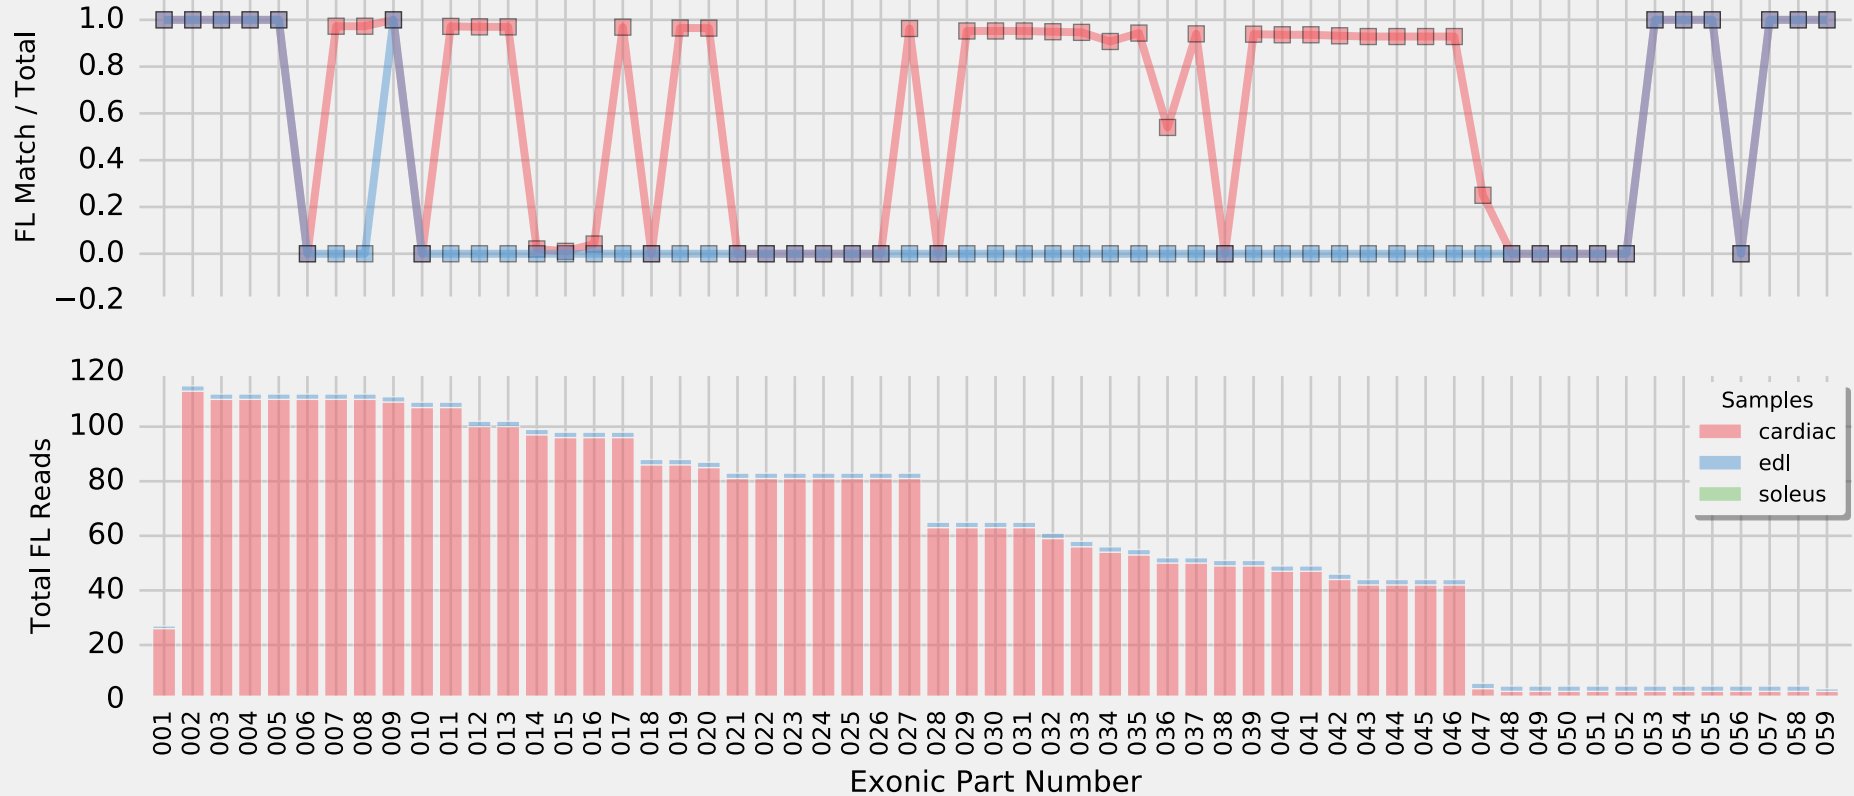

# Nedd4

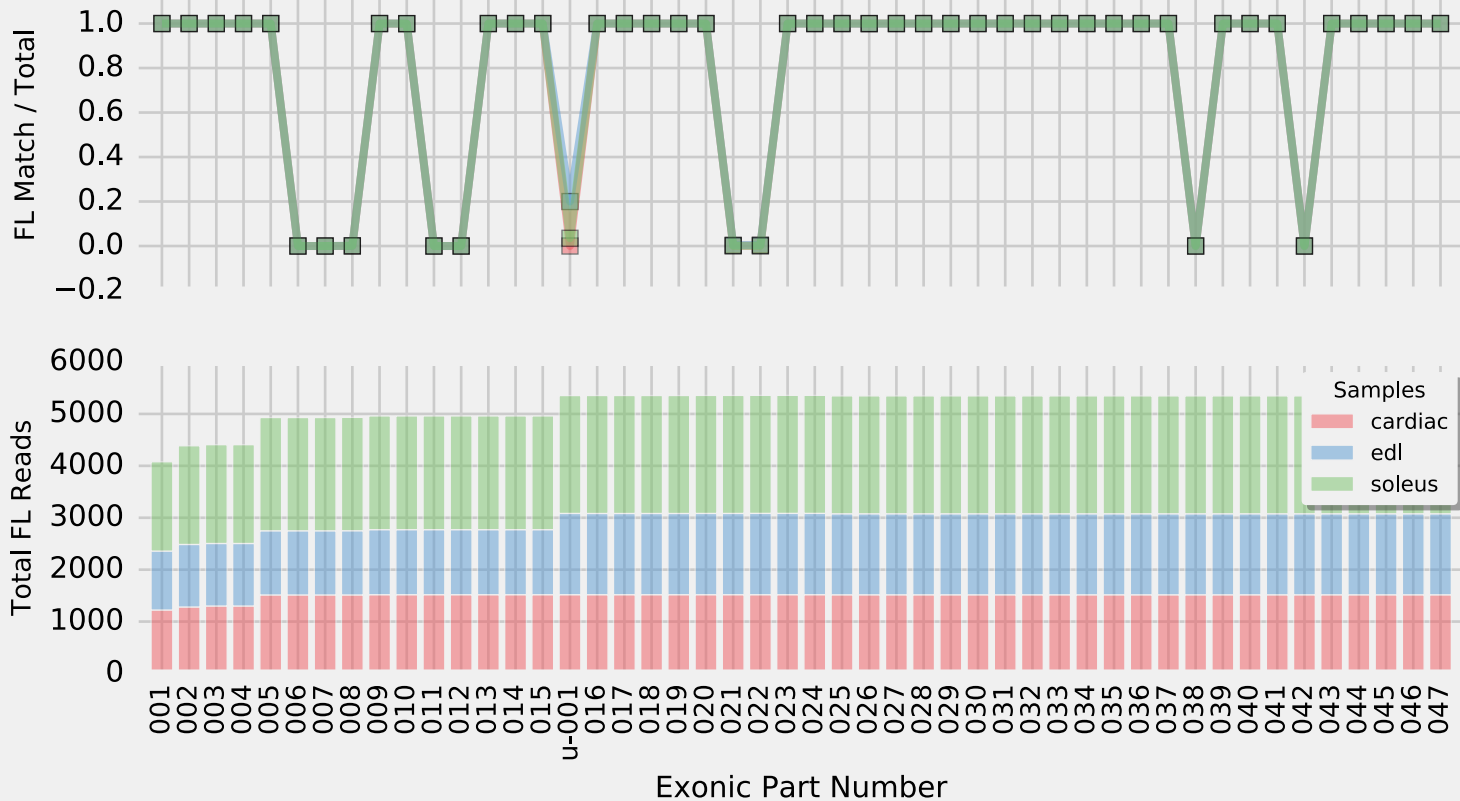

# Nek9

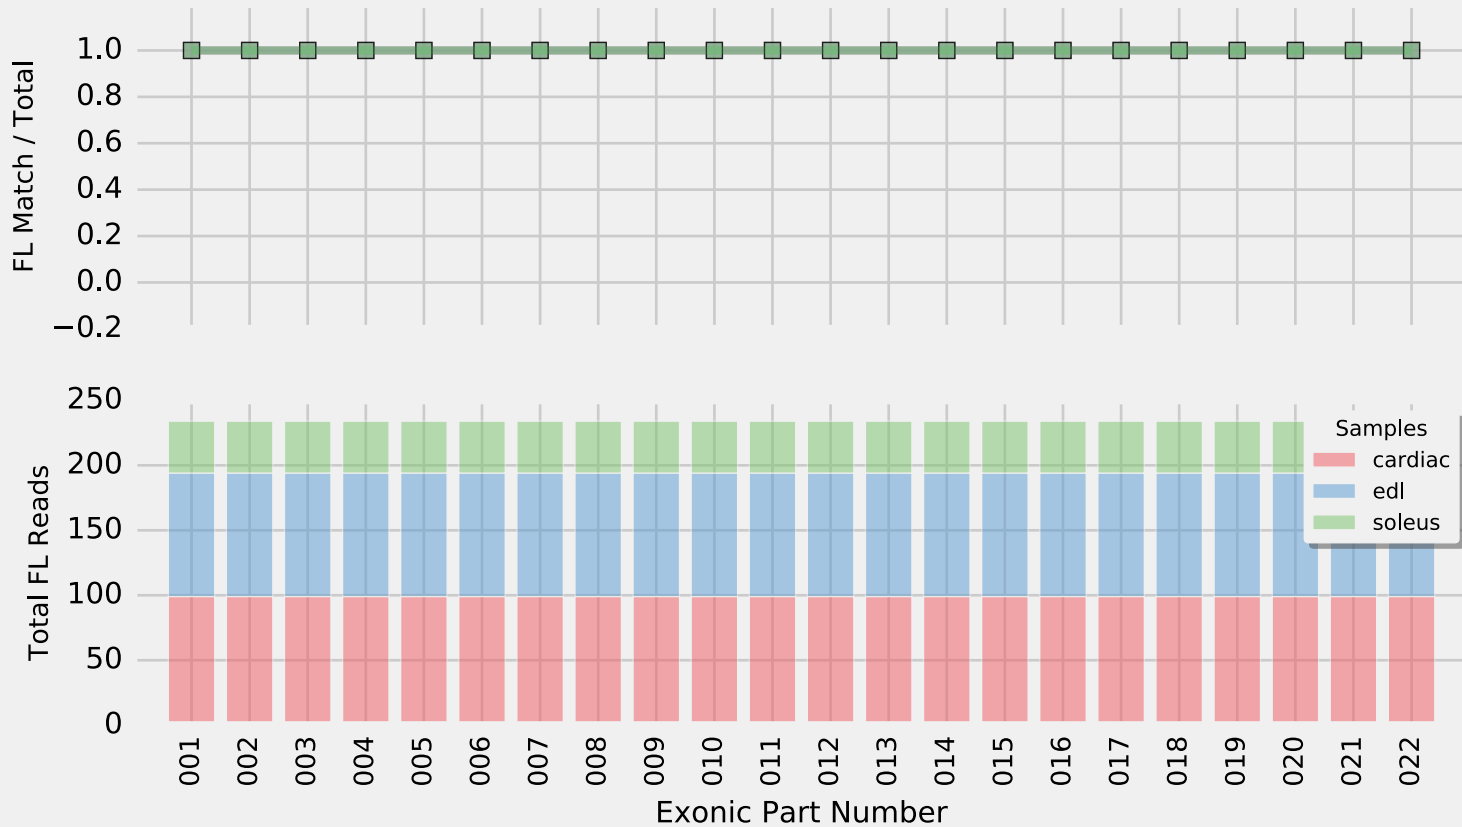



# Neo1

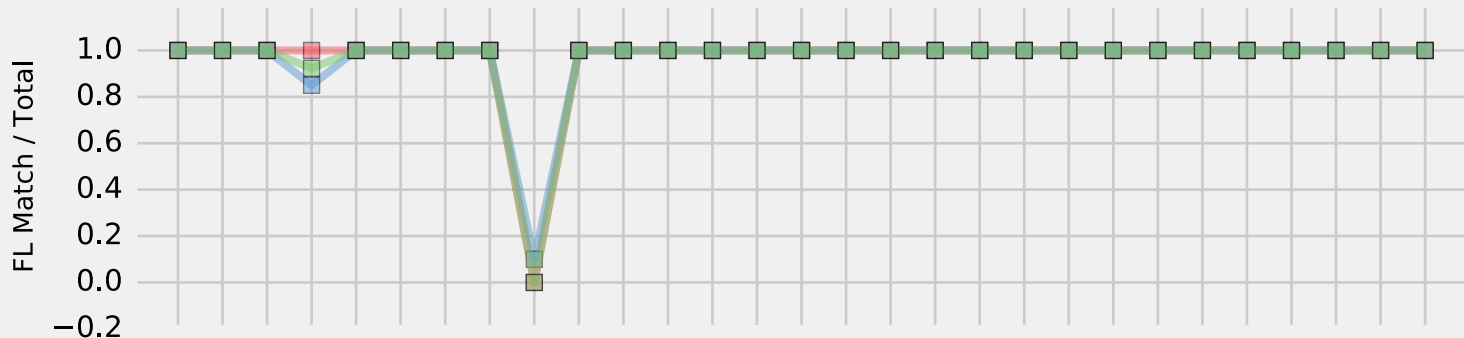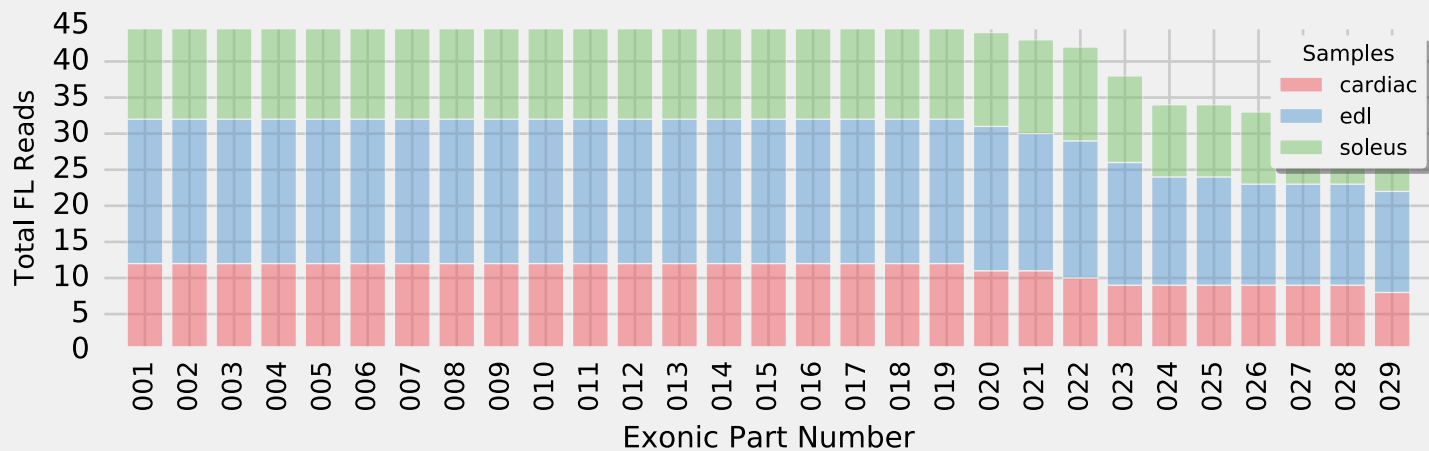

# Nid1

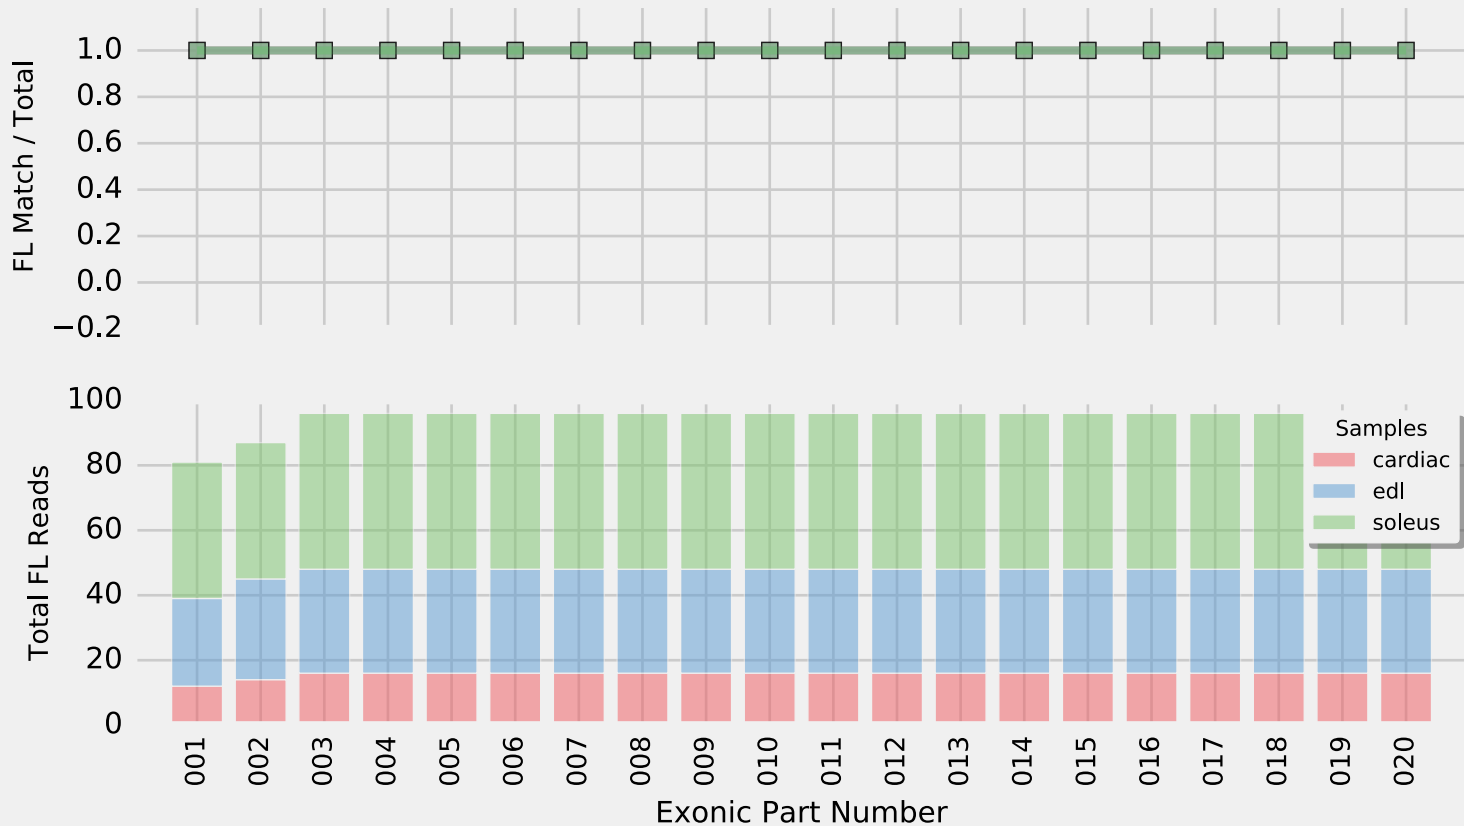

# Nin

FL Match / Total

1.0  
0.8  
0.6  
0.4  
0.2  
0.0  
-0.2

Total FL Reads

30  
25  
20  
15  
10  
5  
0

Exonic Part Number

Samples  
cardiac  
edl  
soleus

001 002 003 004 005 006 007 008 009 010 011 012 013 014 015 016 017 018 019 020 021 022 023 024 025 026 027 028 029 030 031 032 033 034 035 036 037

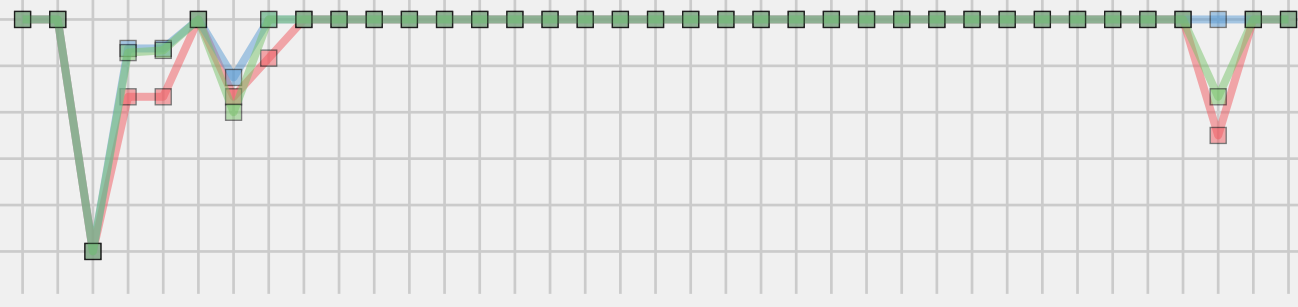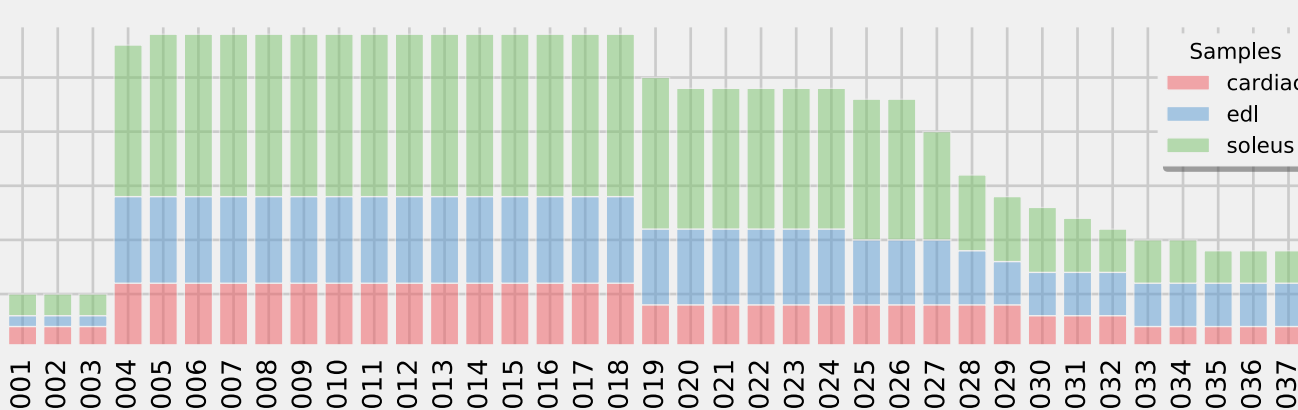

# Nisch

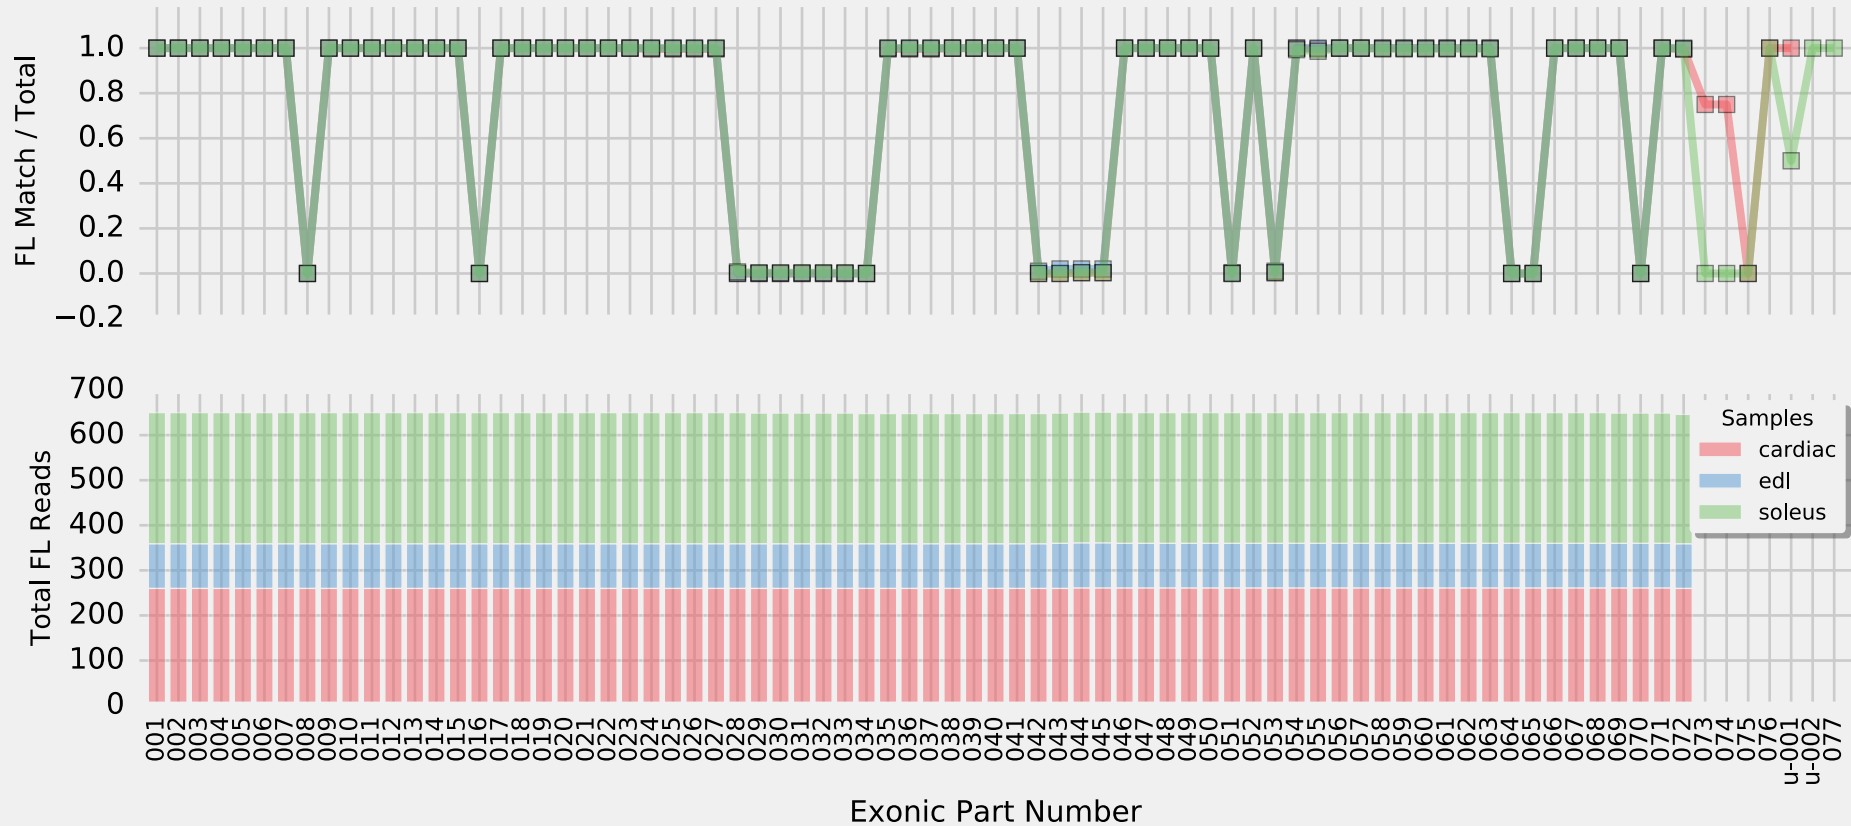

# Nktr

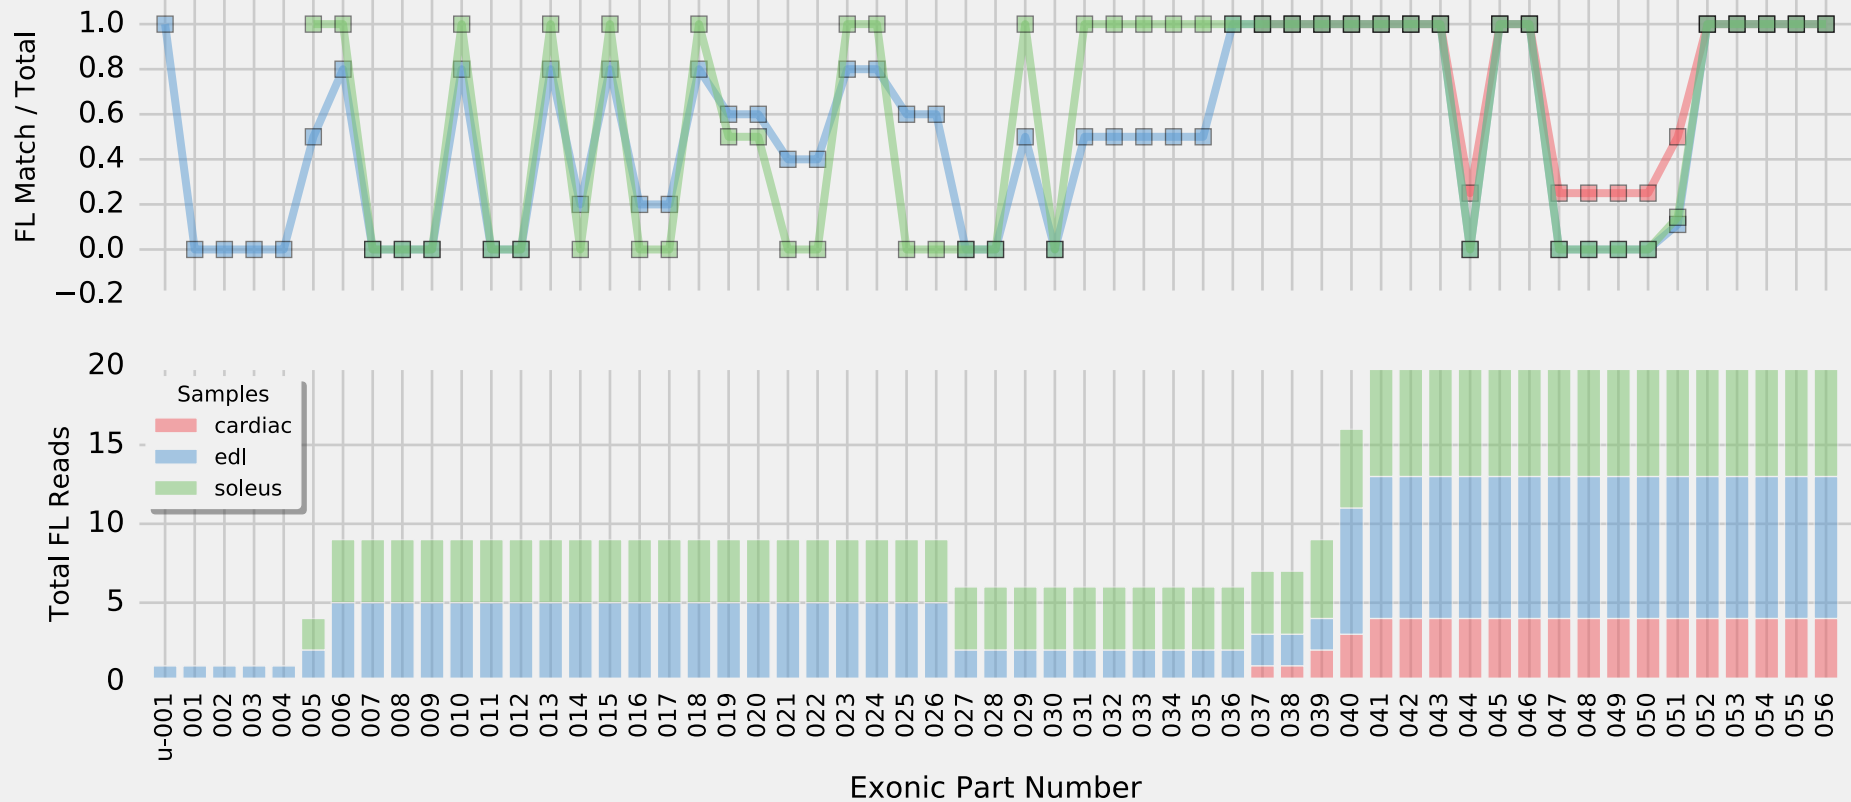

# Npc1

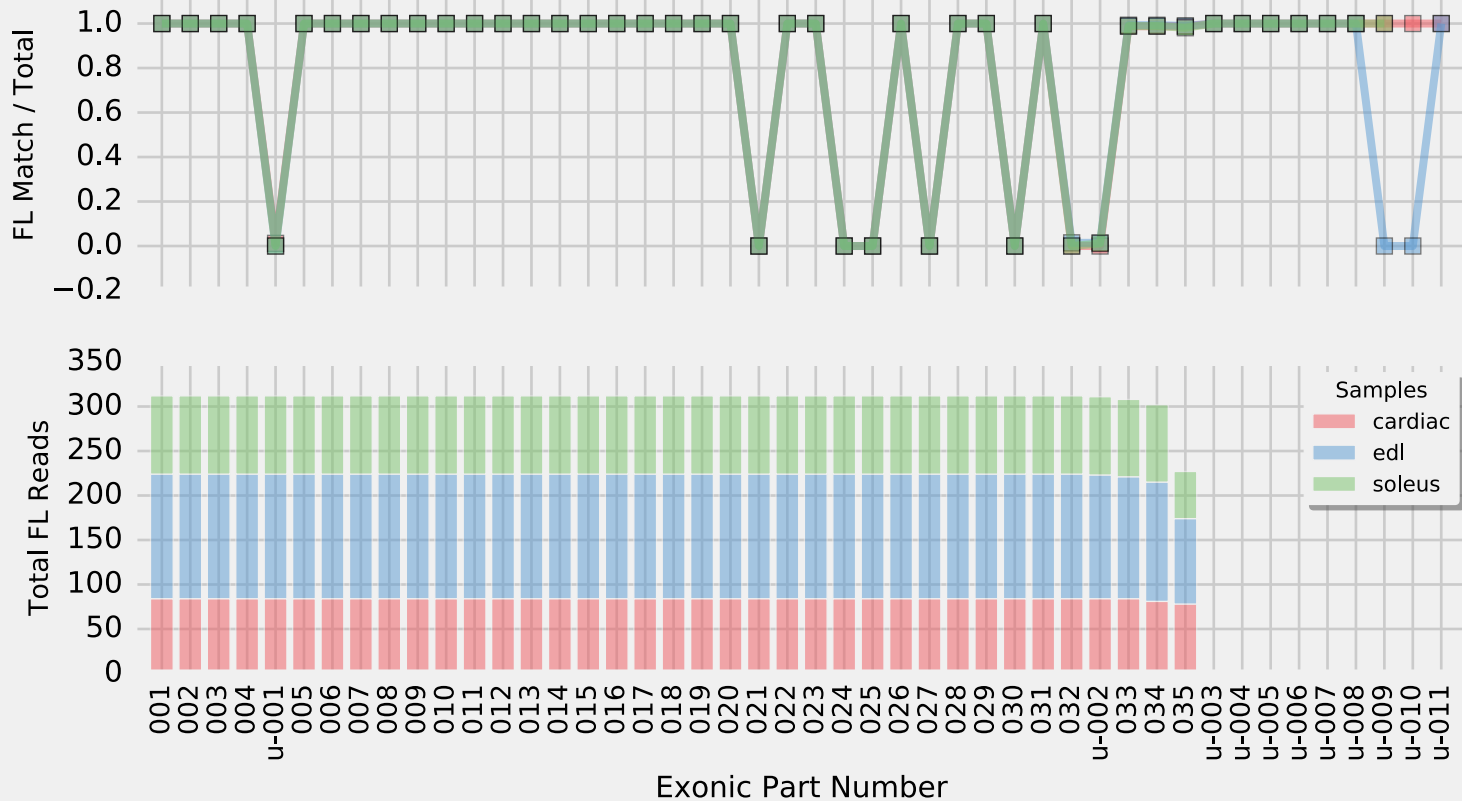

# Nr3c1

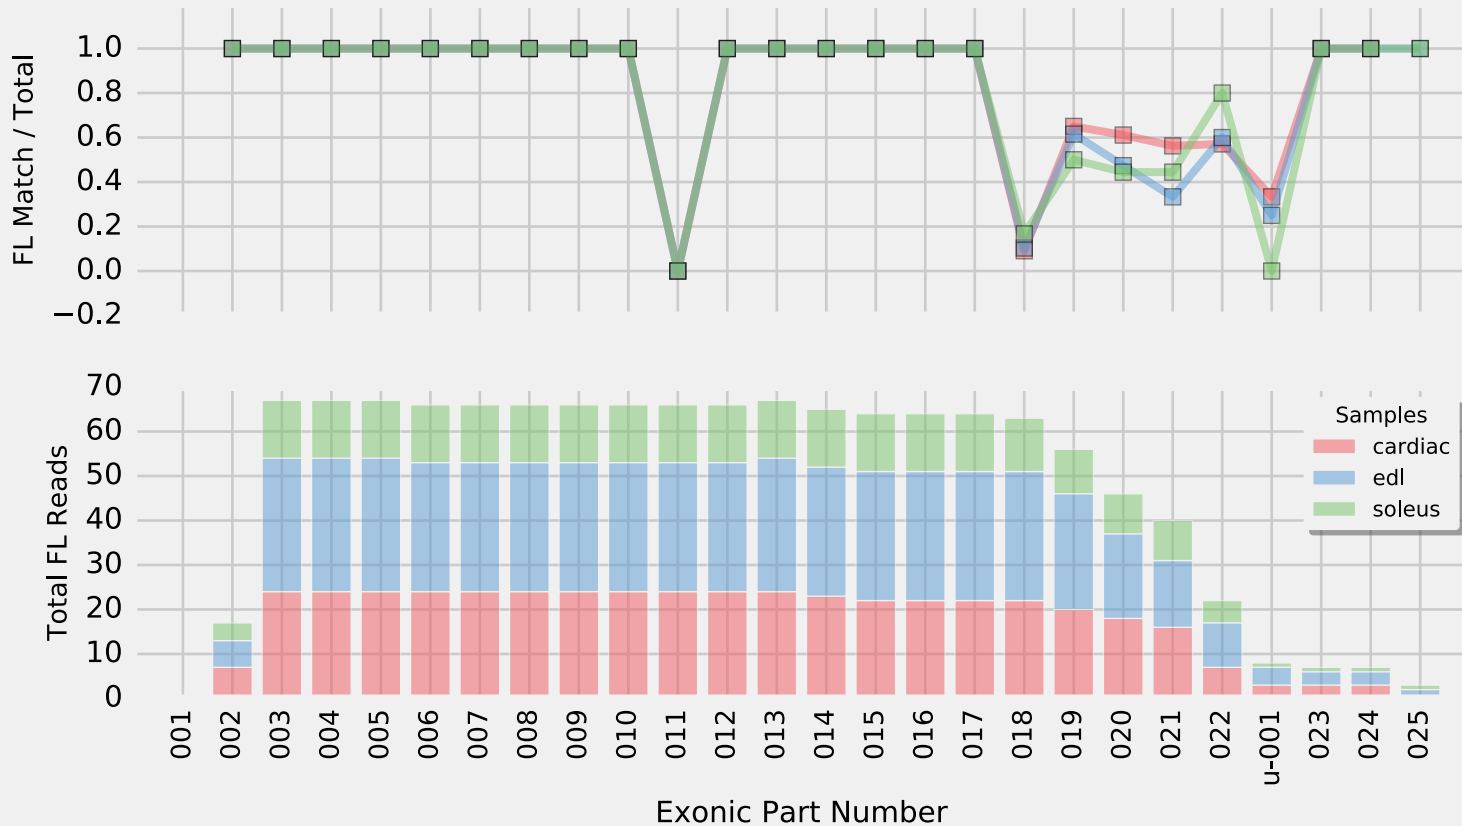

# Nr3c2

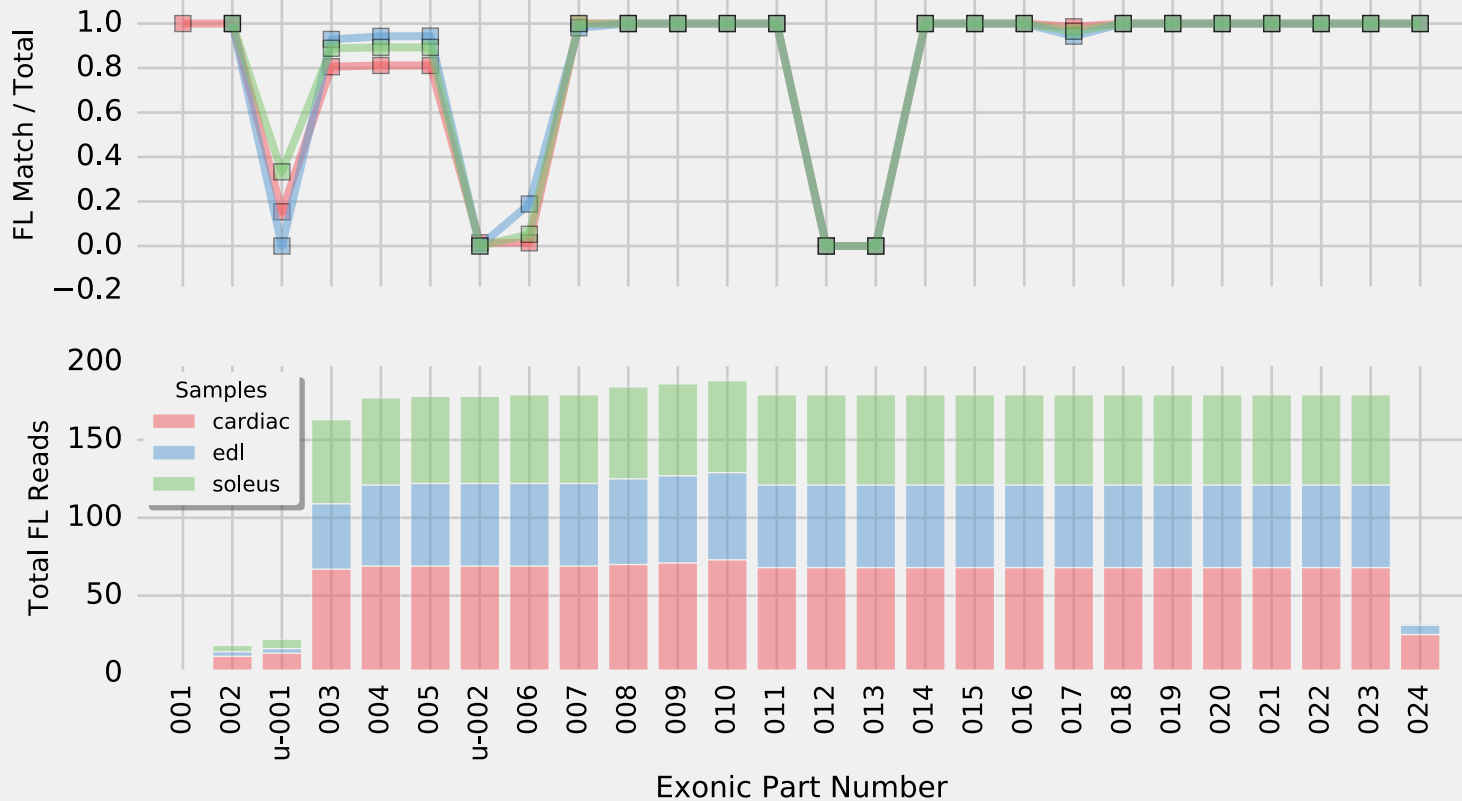



# Nrap

FL Match / Total

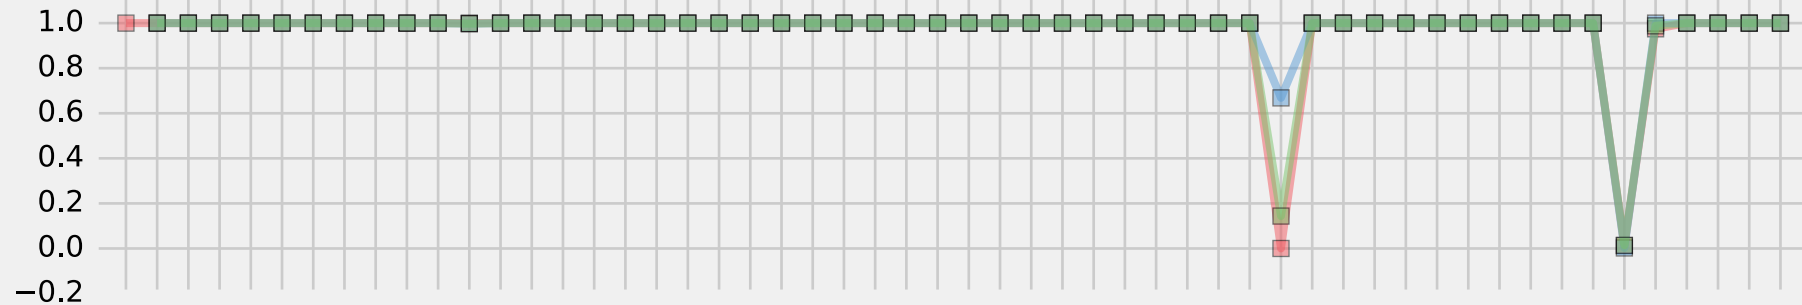

Total FL Reads

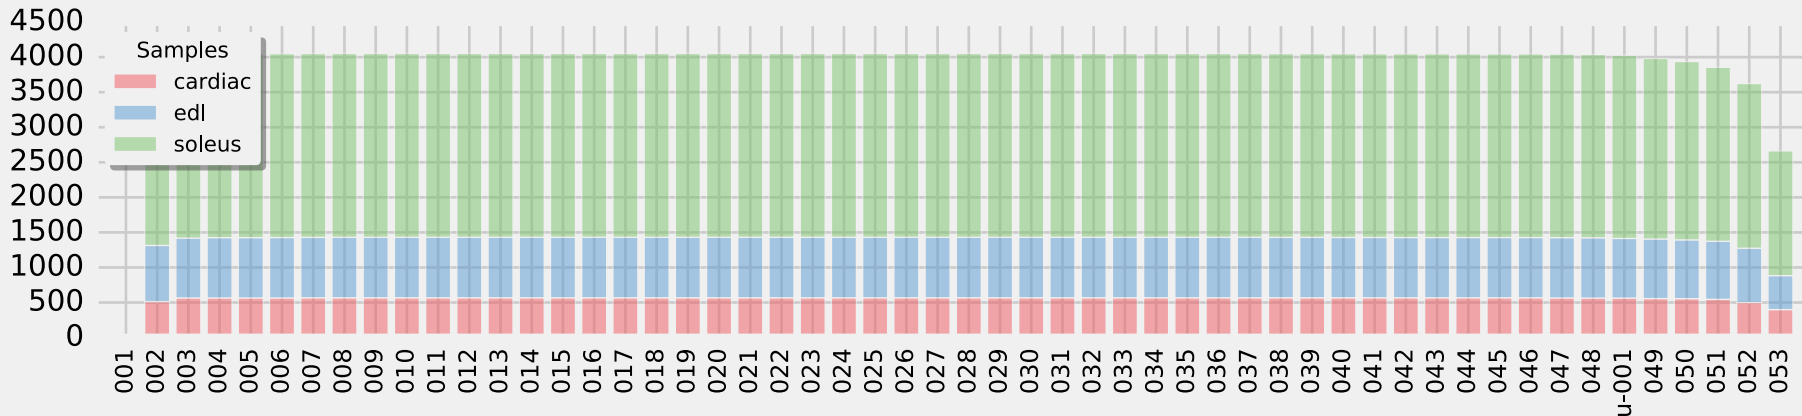

Exonic Part Number

# Nrd1

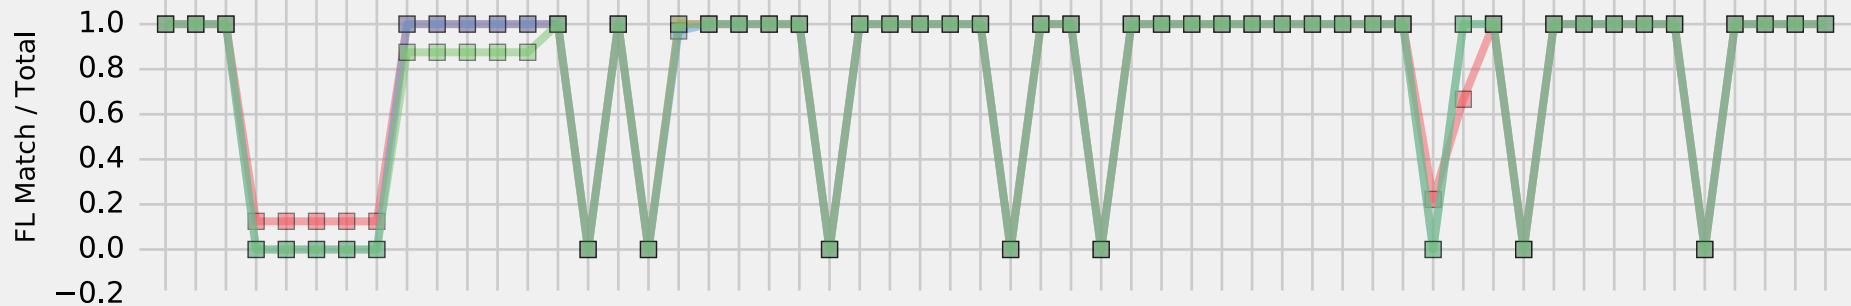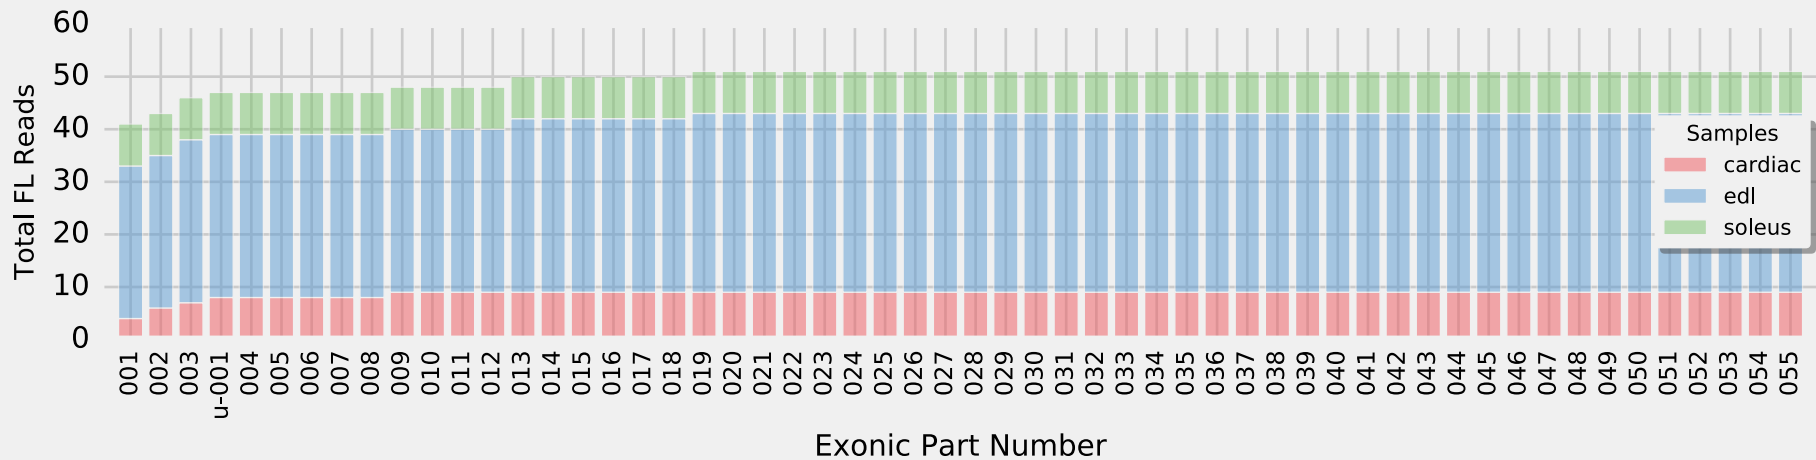

# Nsd1

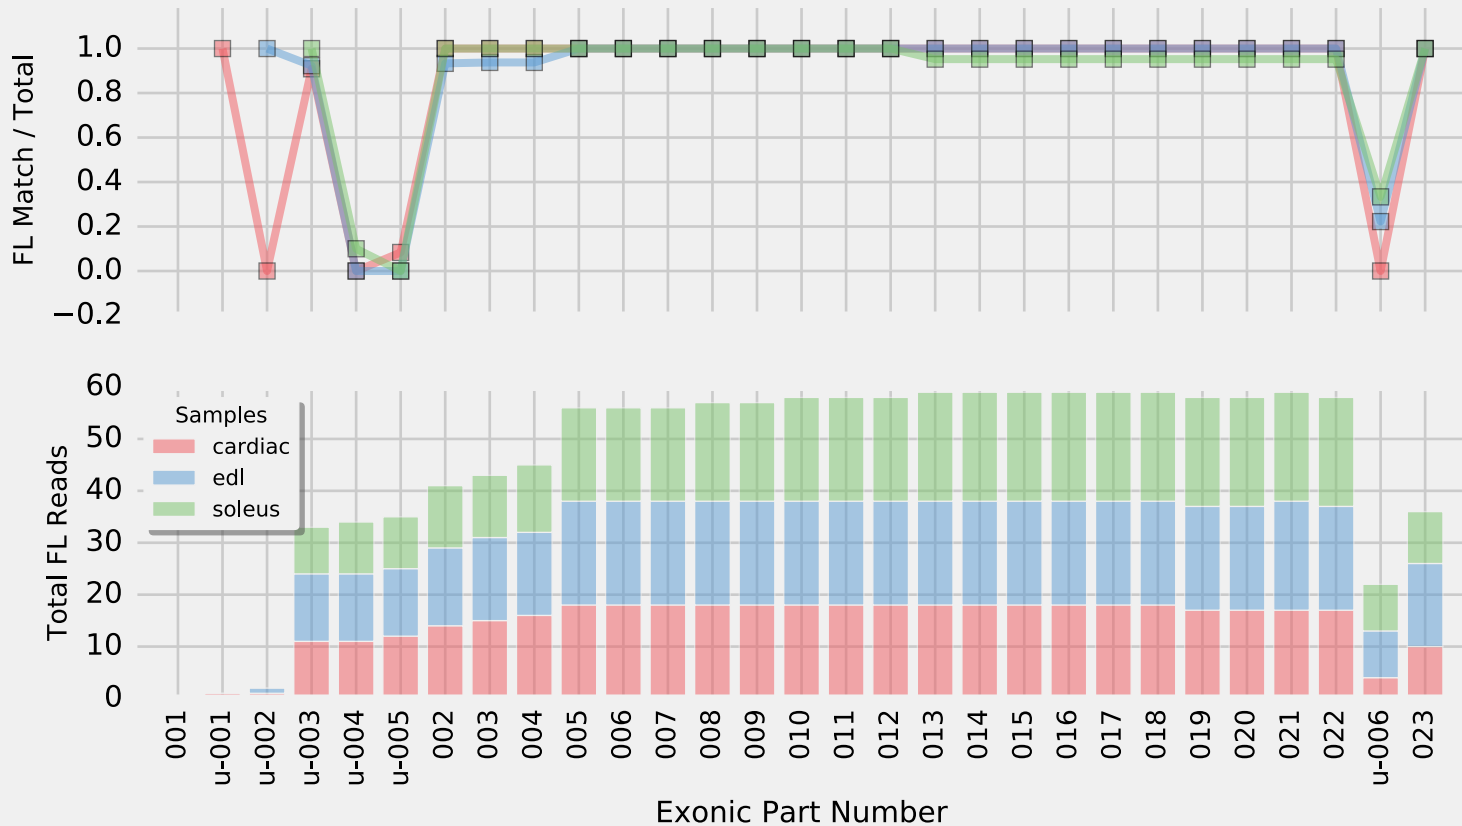

# Nt5dc3

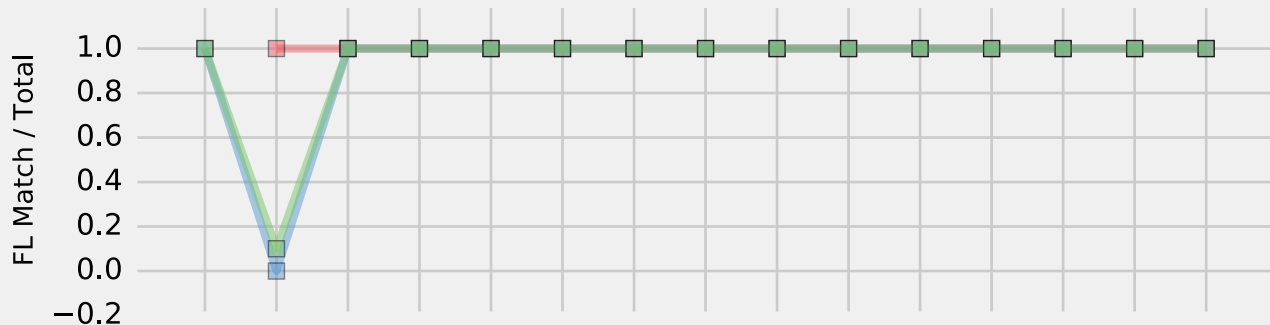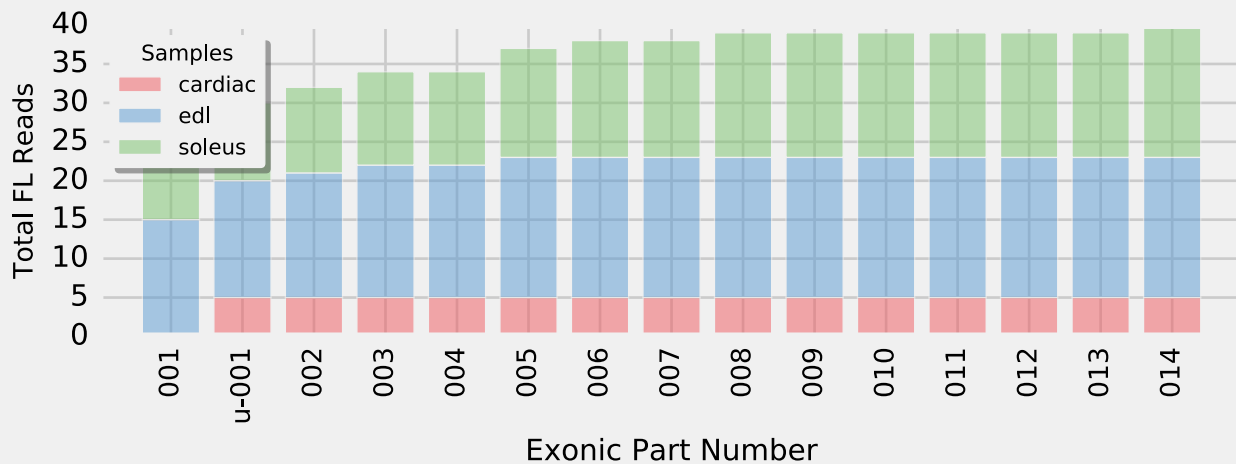

# Nuak1

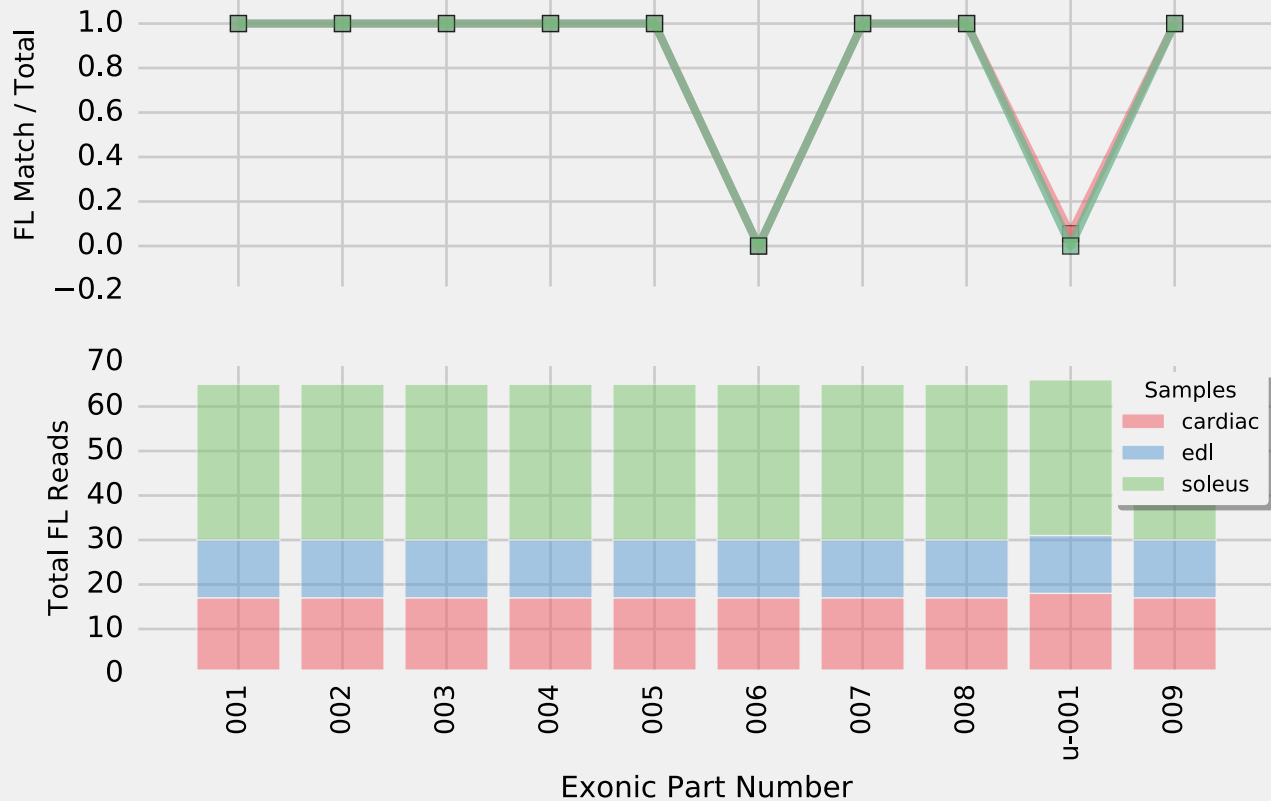

# Nucks1

FL Match / Total

1.0  
0.8  
0.6  
0.4  
0.2  
0.0  
-0.2

Total FL Reads

80  
70  
60  
50  
40  
30  
20  
10  
0

Samples  
cardiac  
edl  
soleus

Exonic Part Number

001

002

003

004

005

006

007

008

009

010

011

012

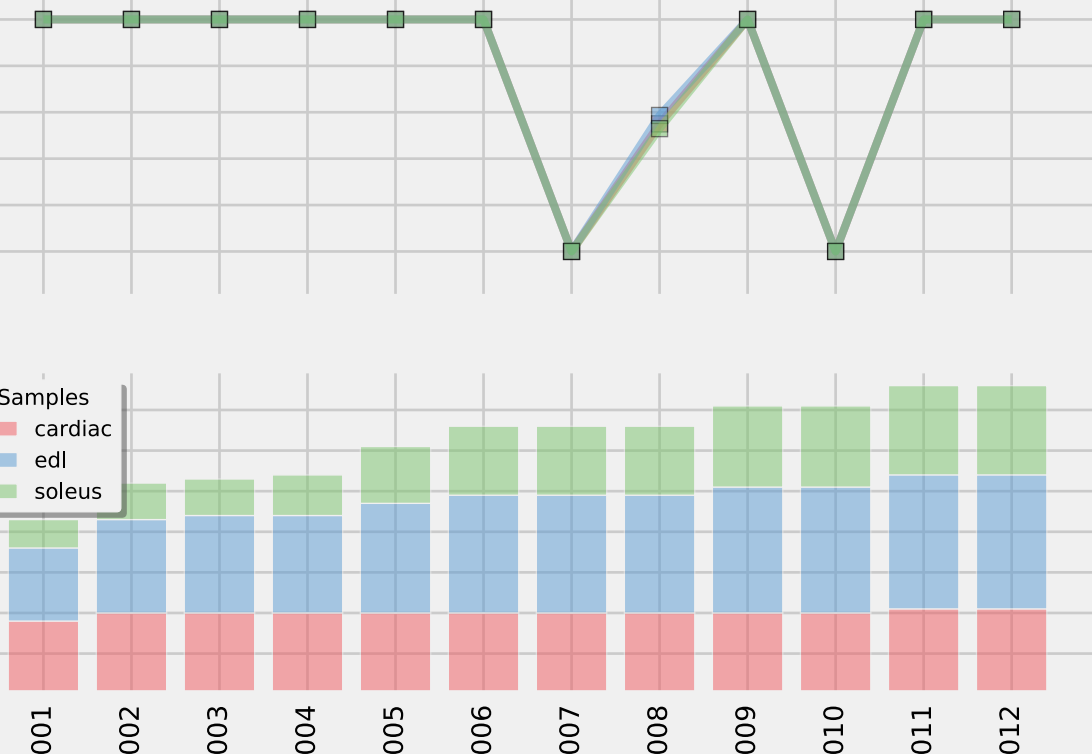

# Numa1

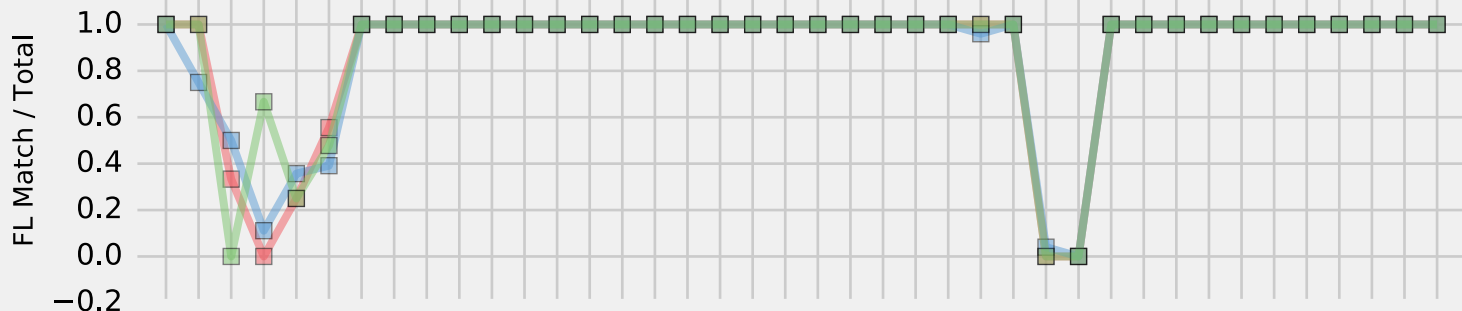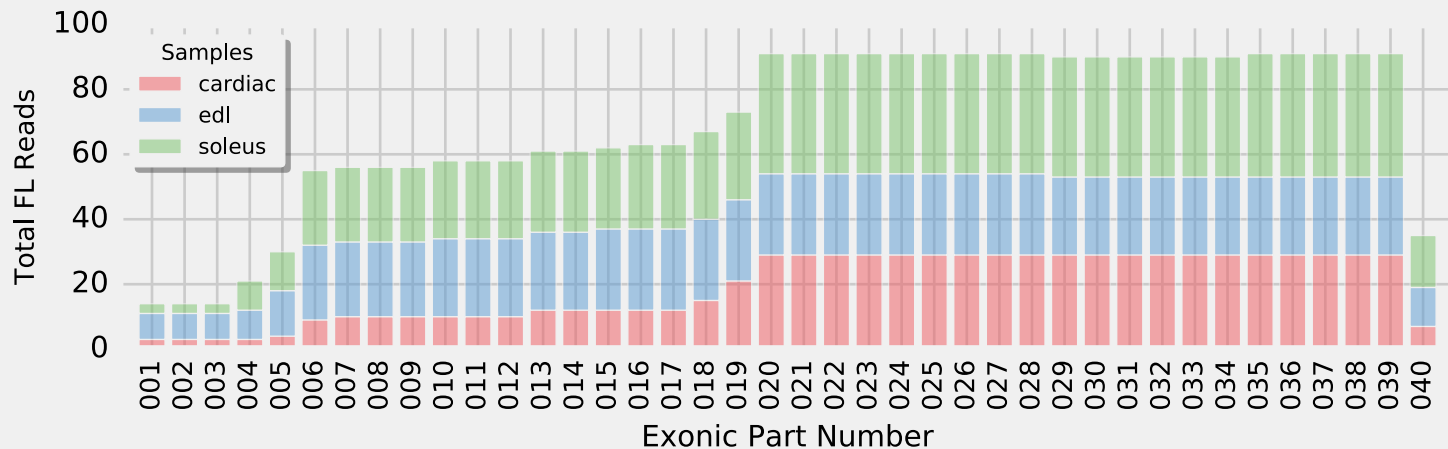

# Nup153

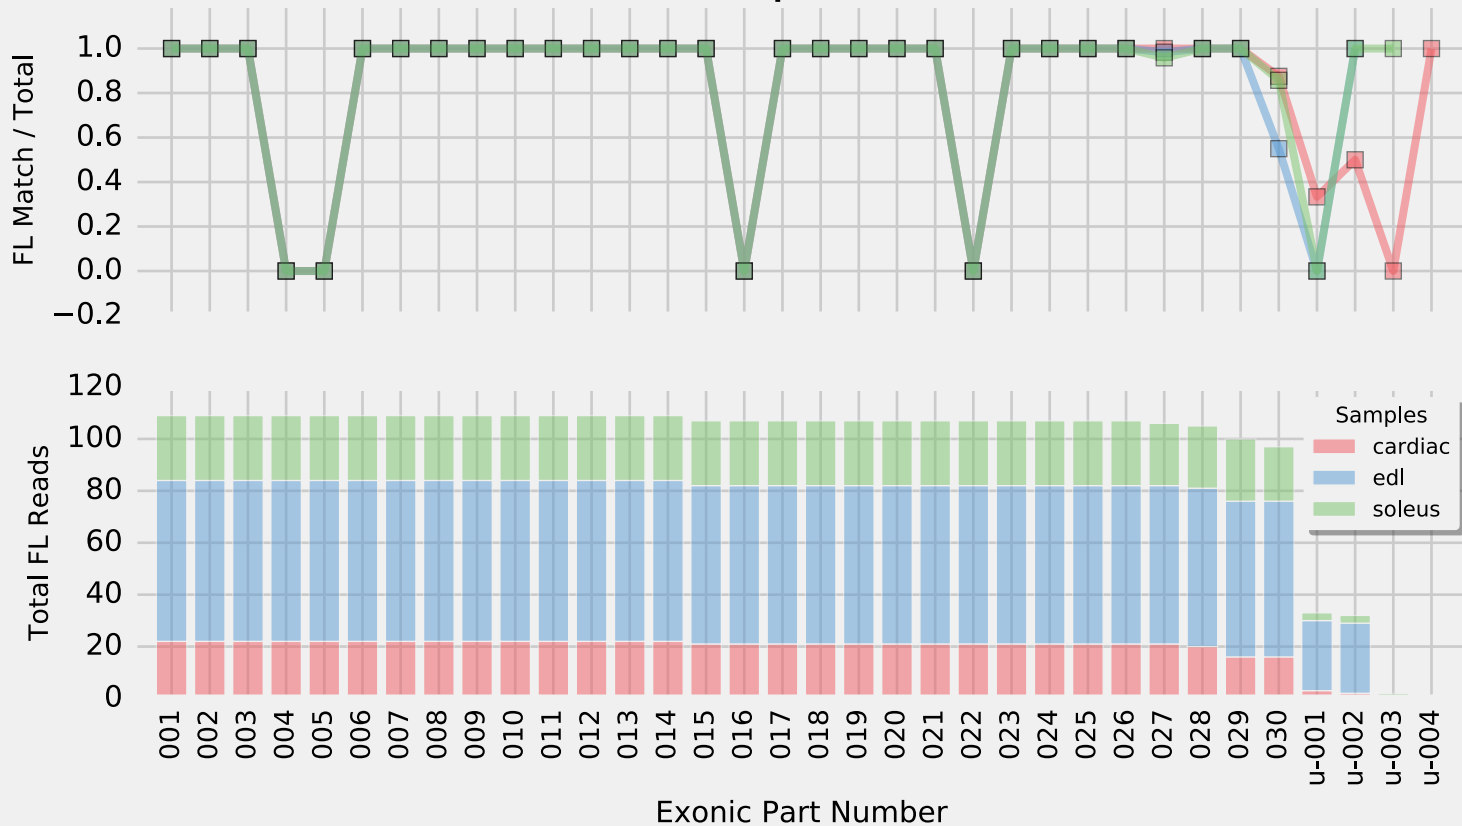



# Nup160

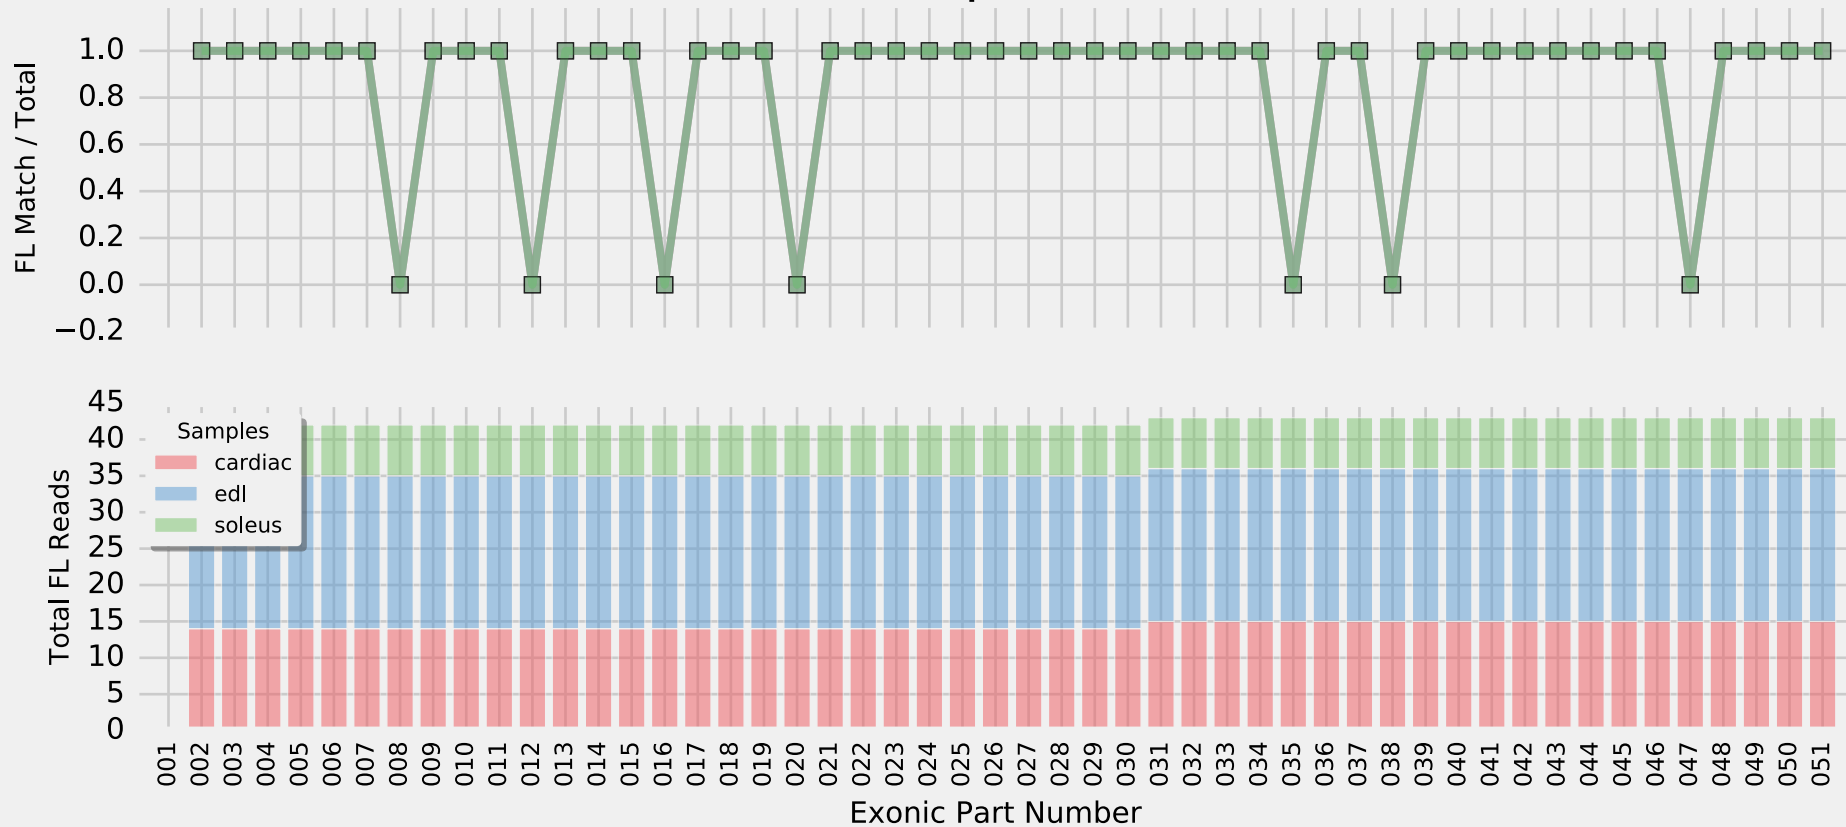

# Nup205

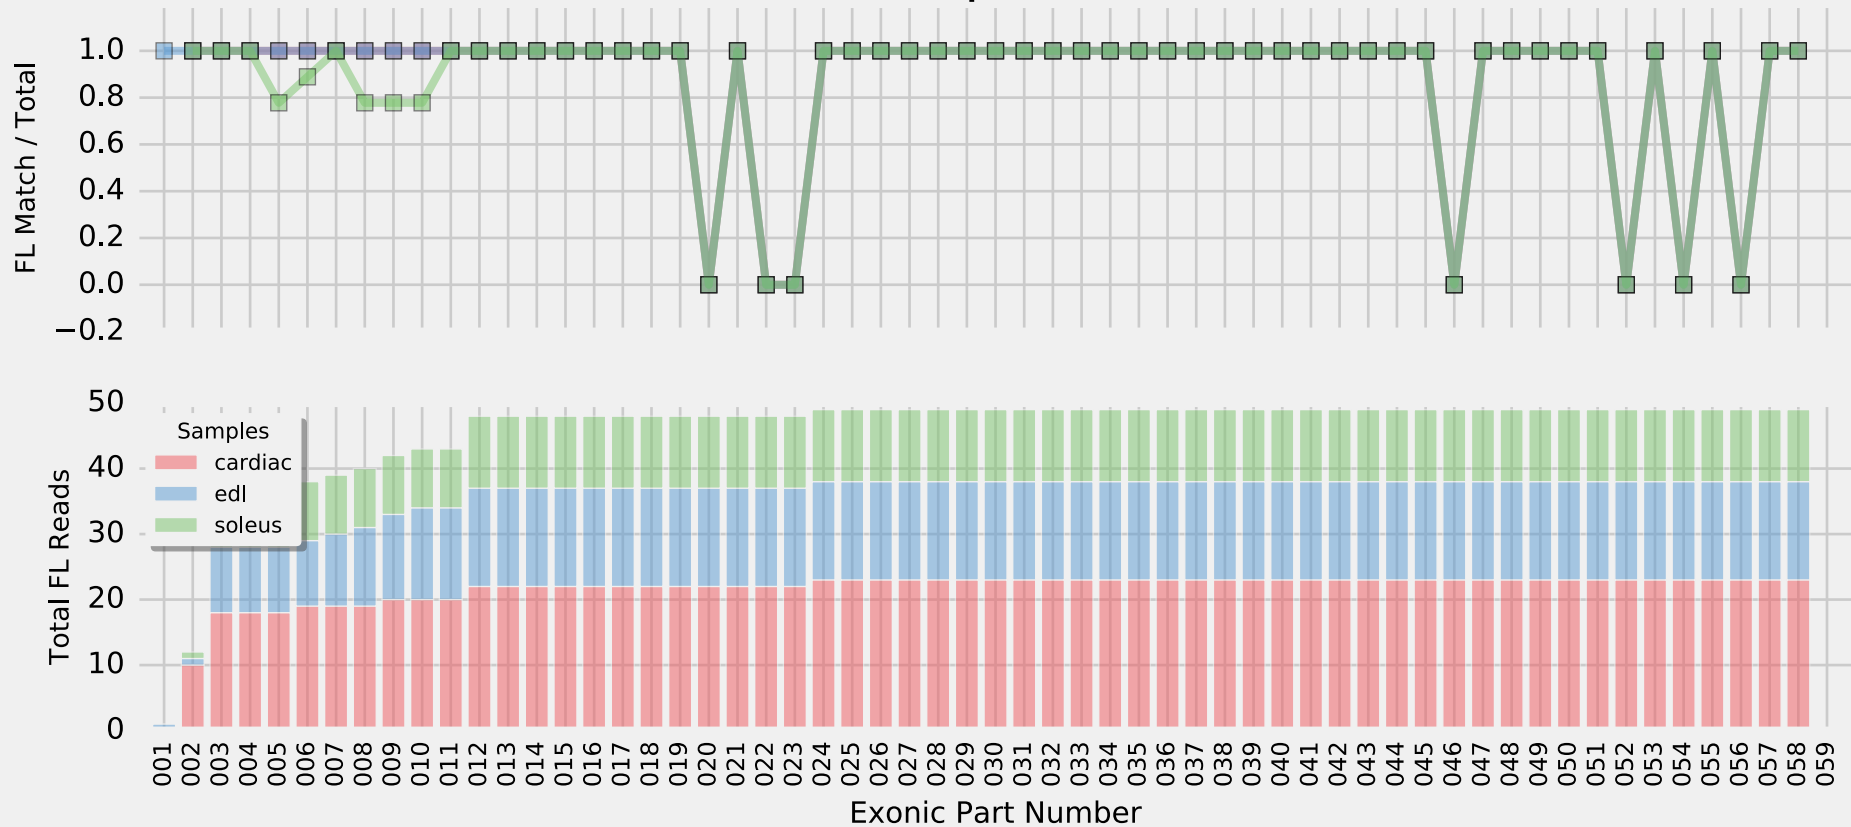

# Nup210

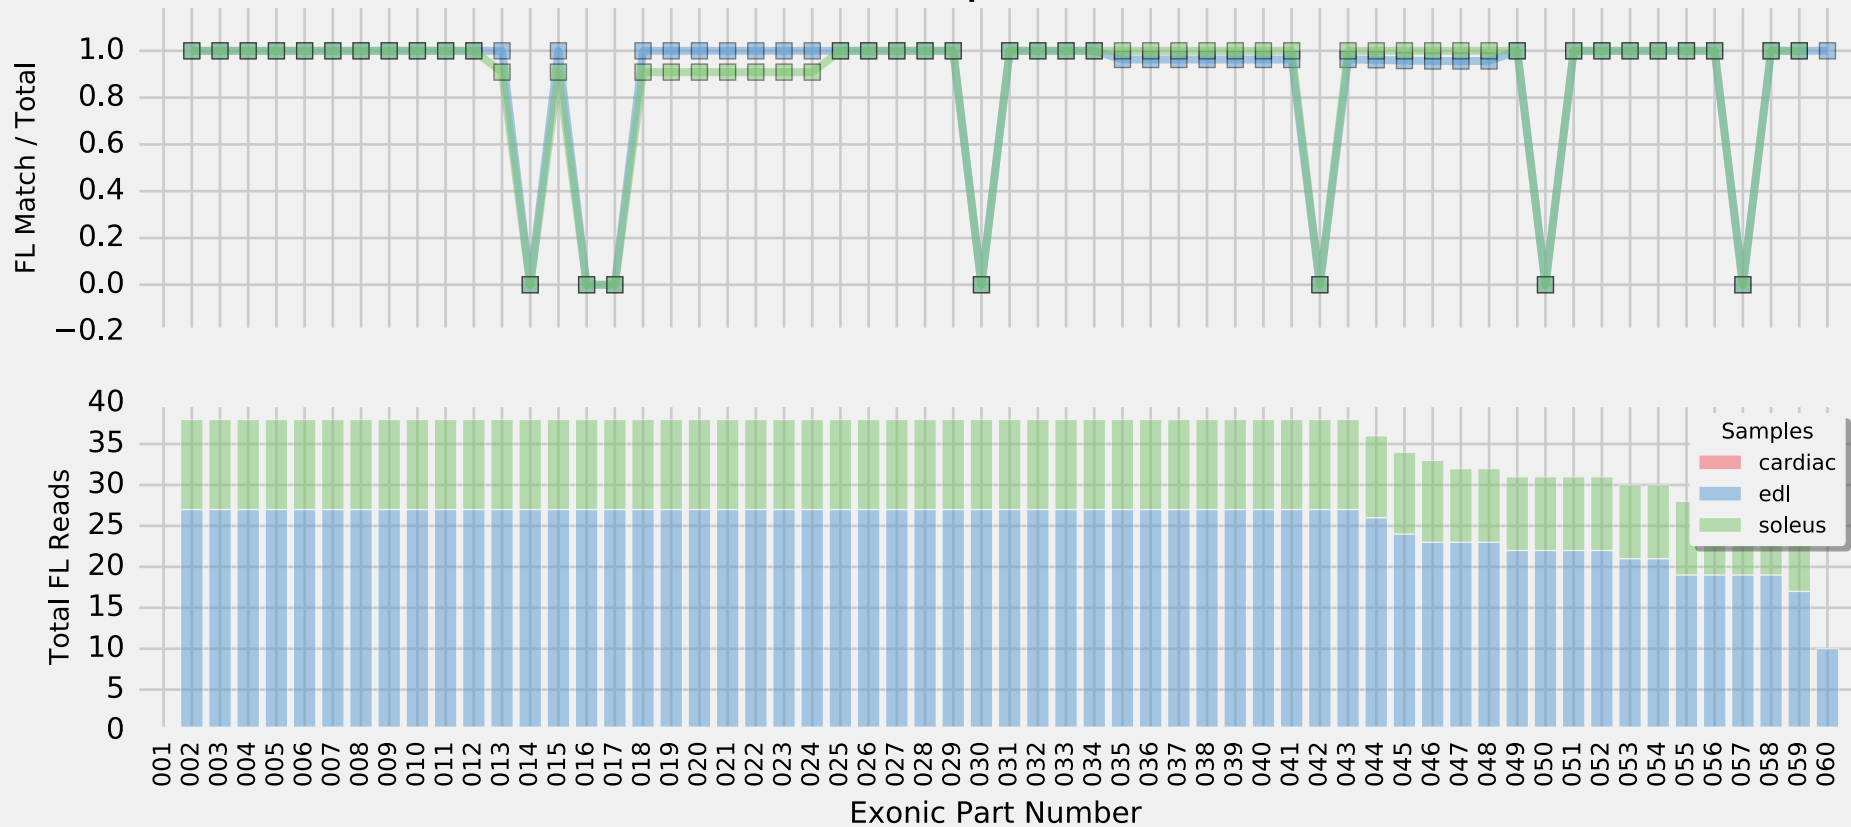

# Obscn

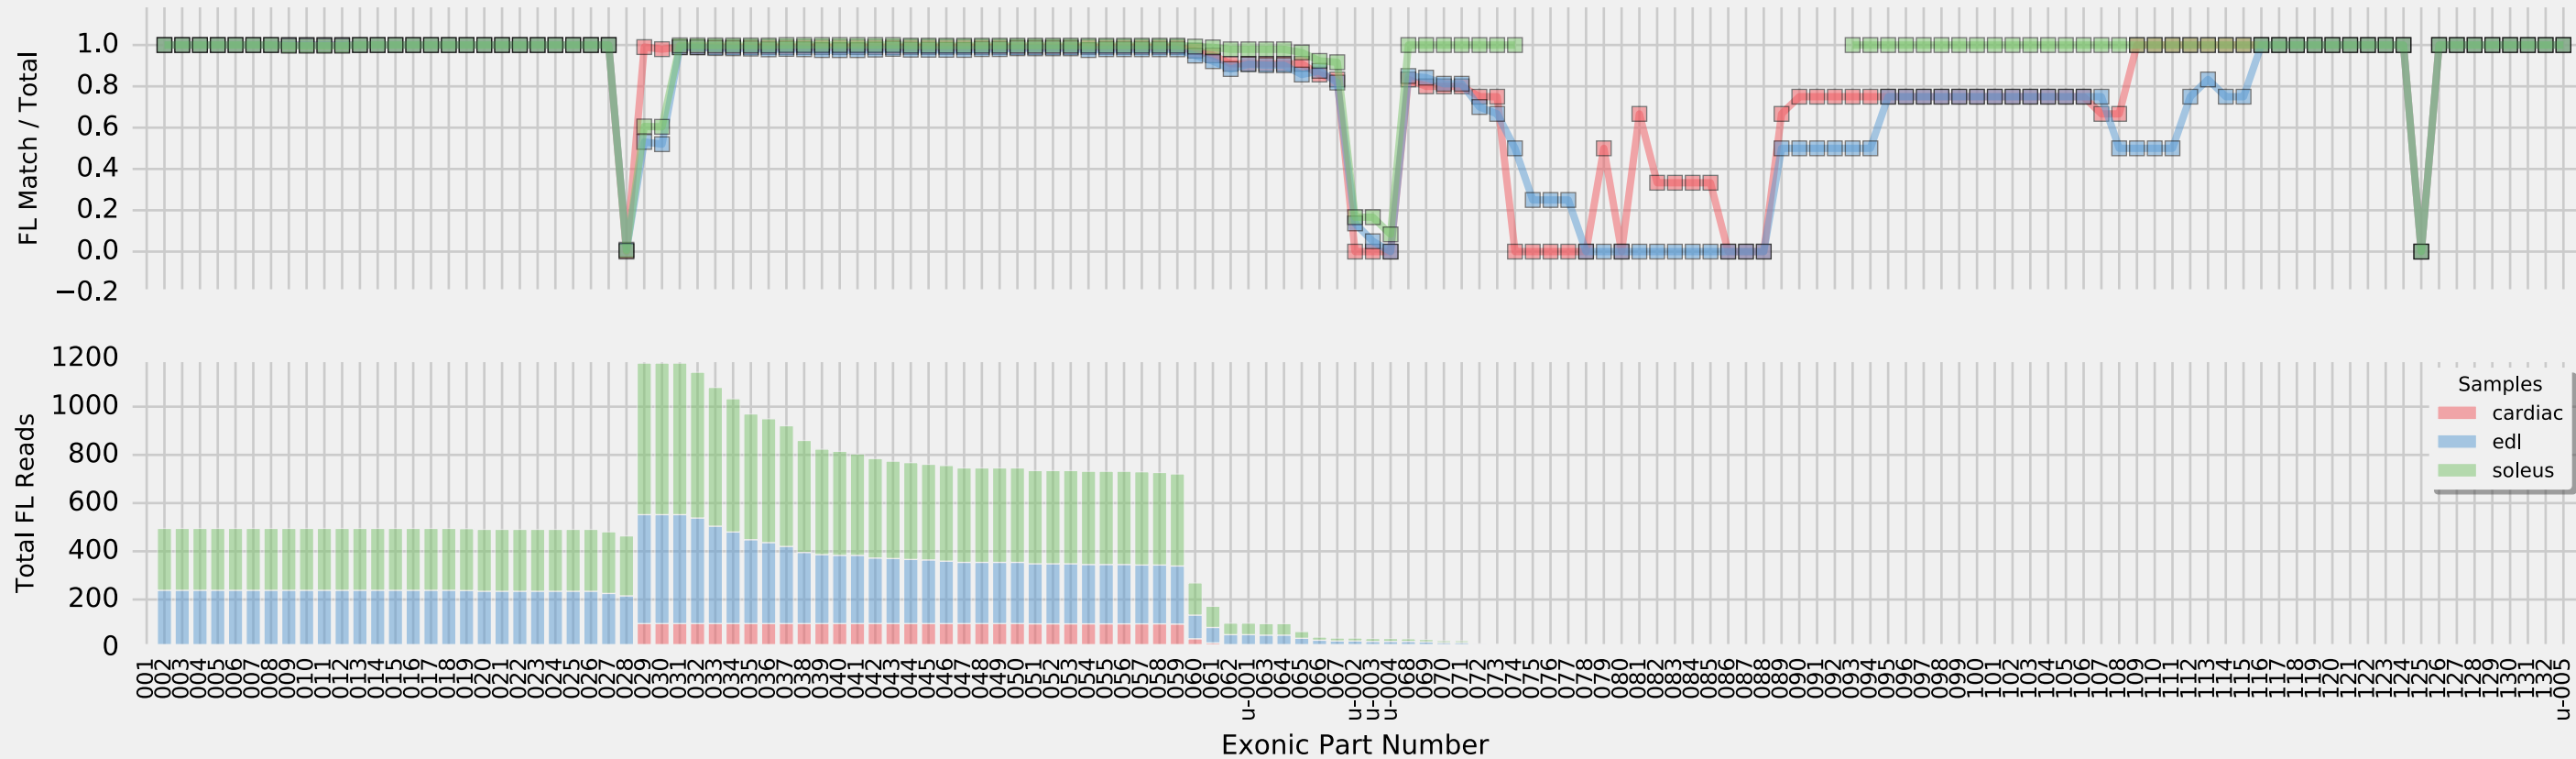

# Obsl1

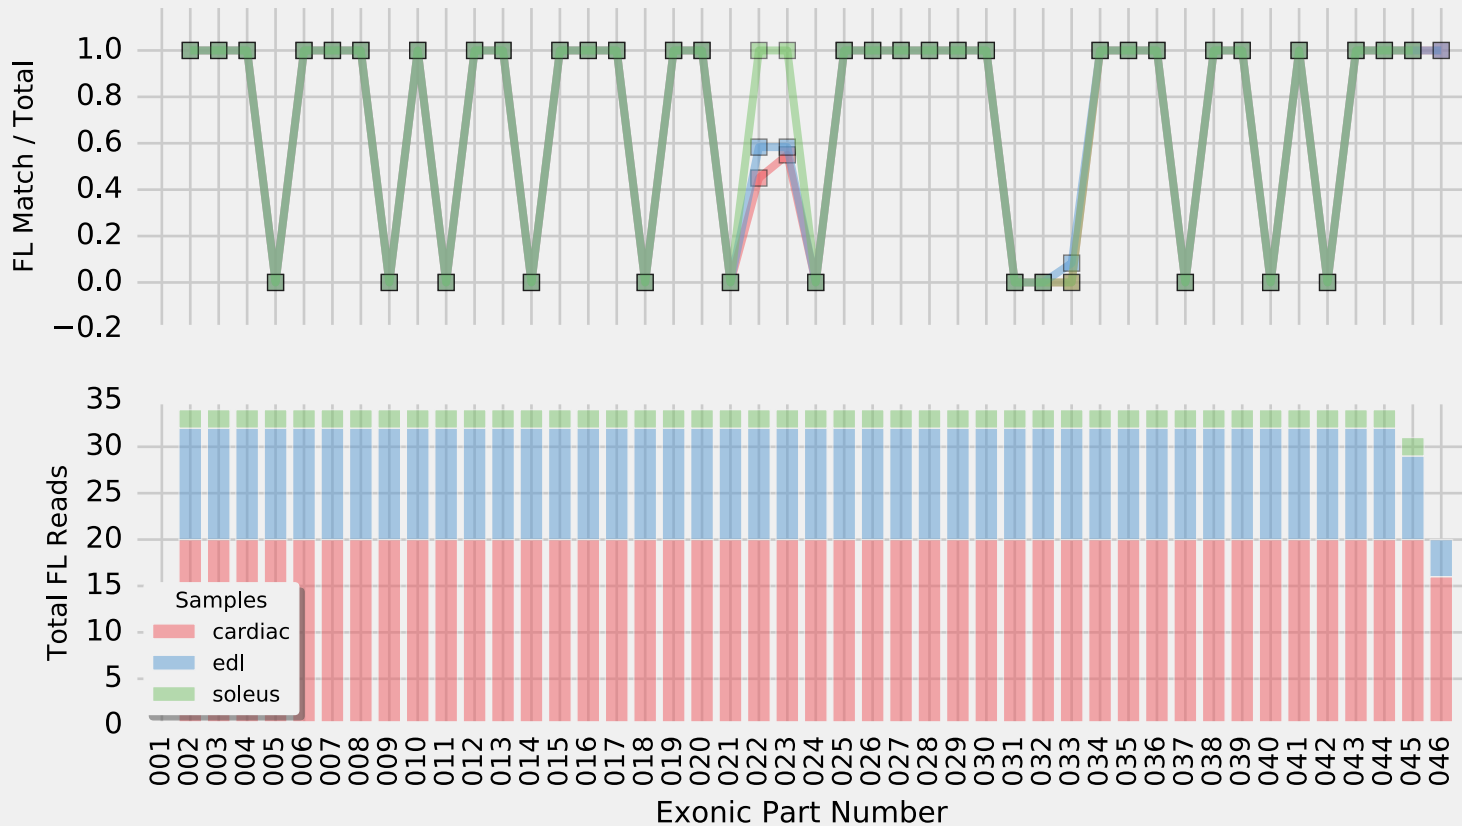

# Ogdh

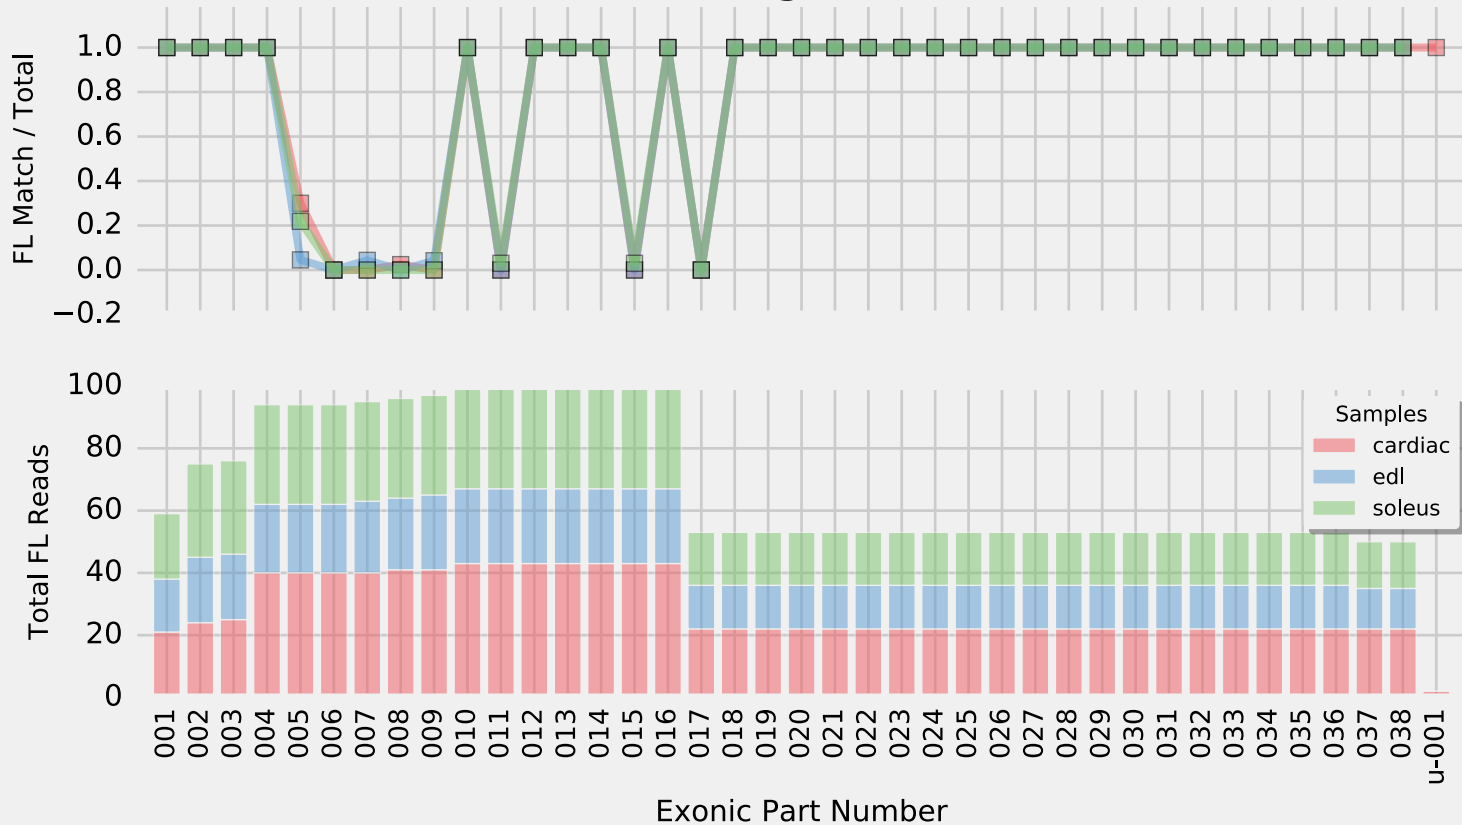

# Ogford1

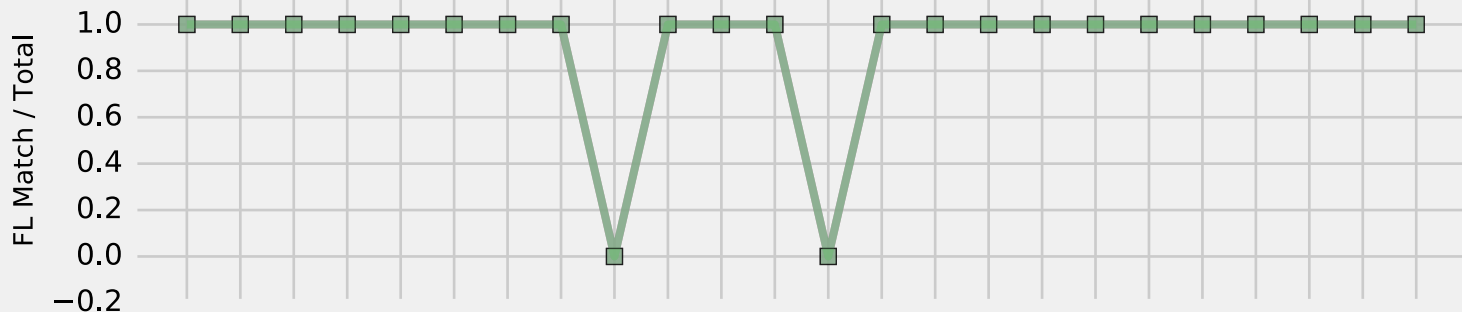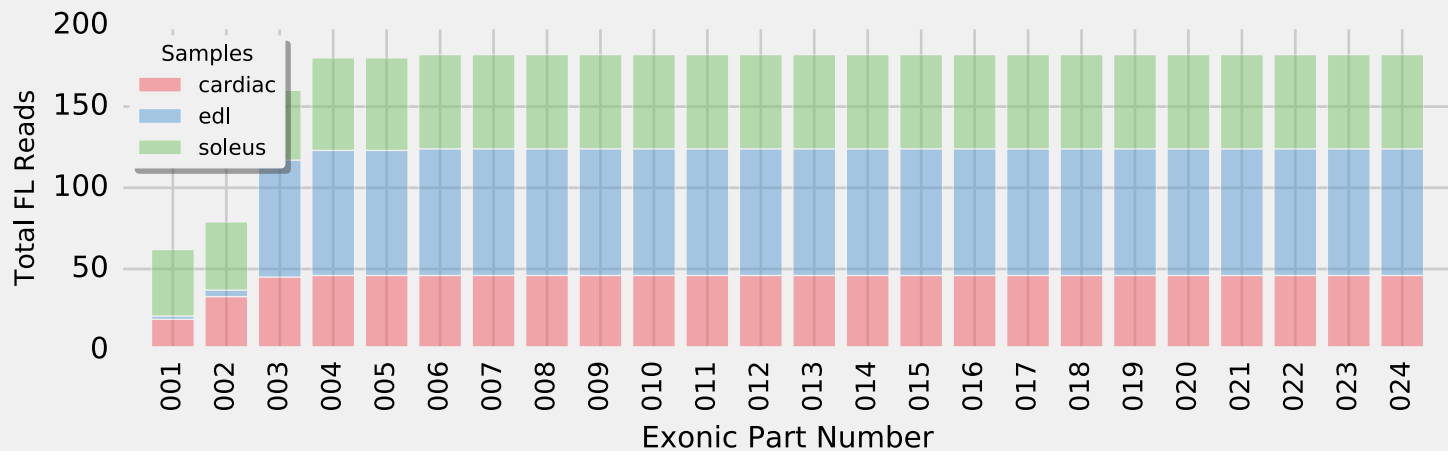

Ogt

FL Match / Total

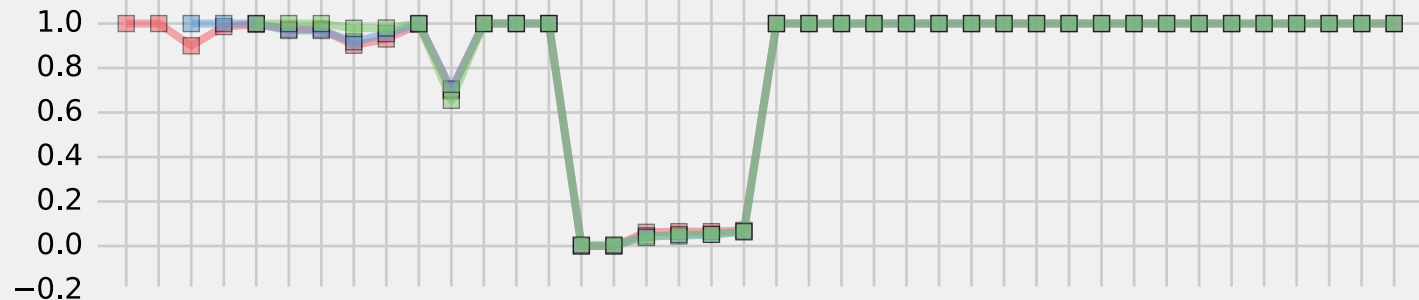

Total FL Reads

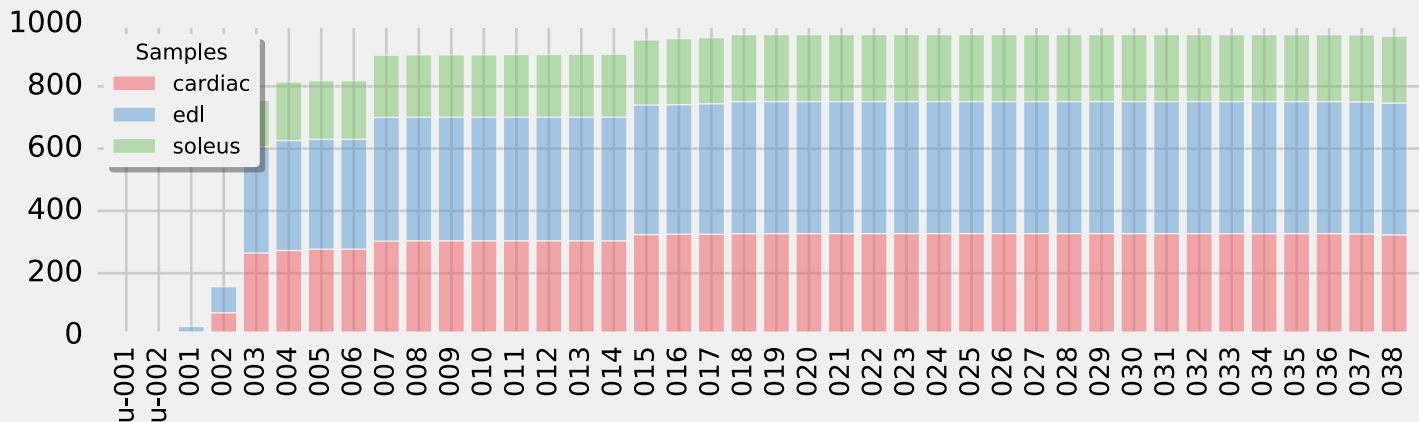

Exonic Part Number



# Opa1

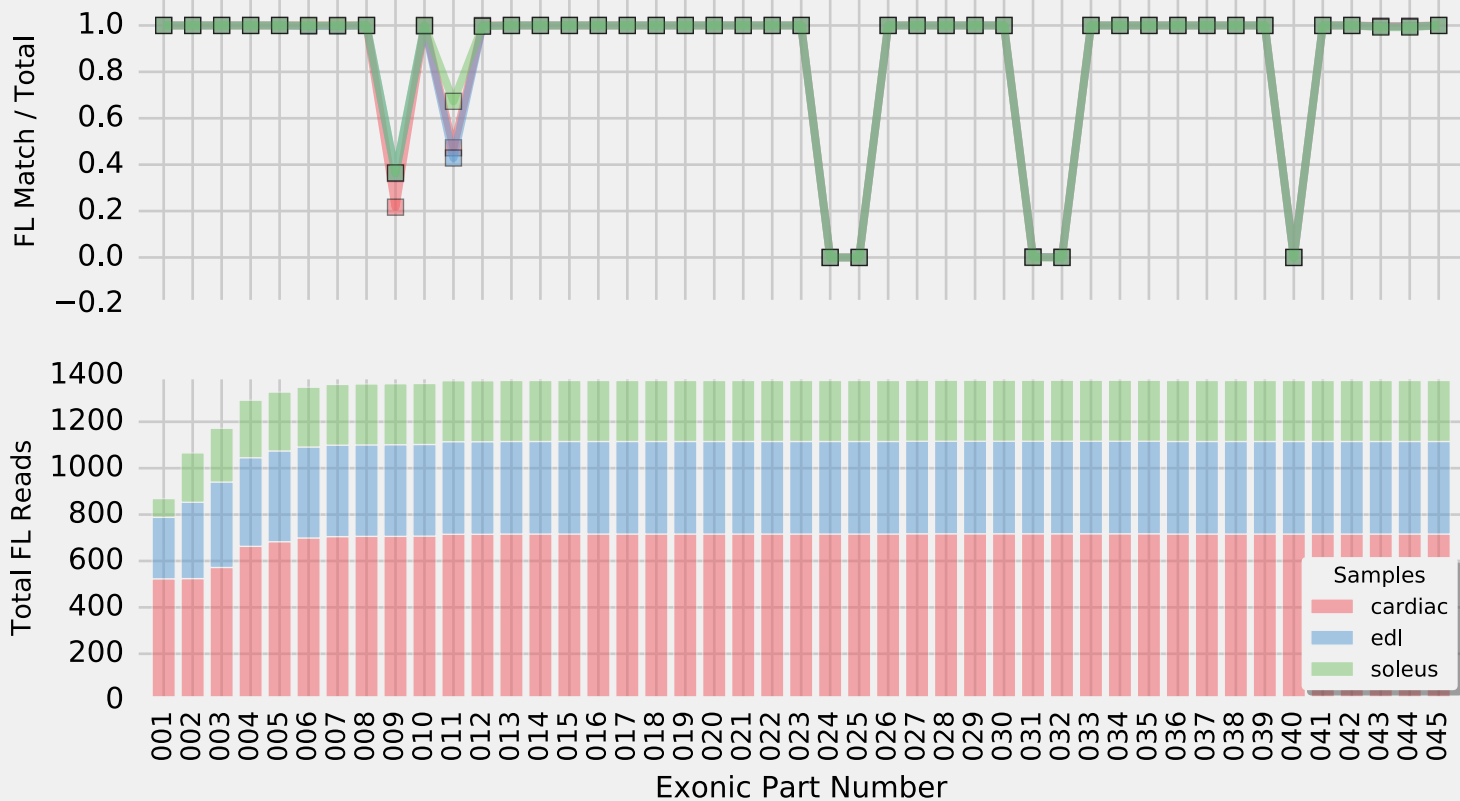

# Osbp18

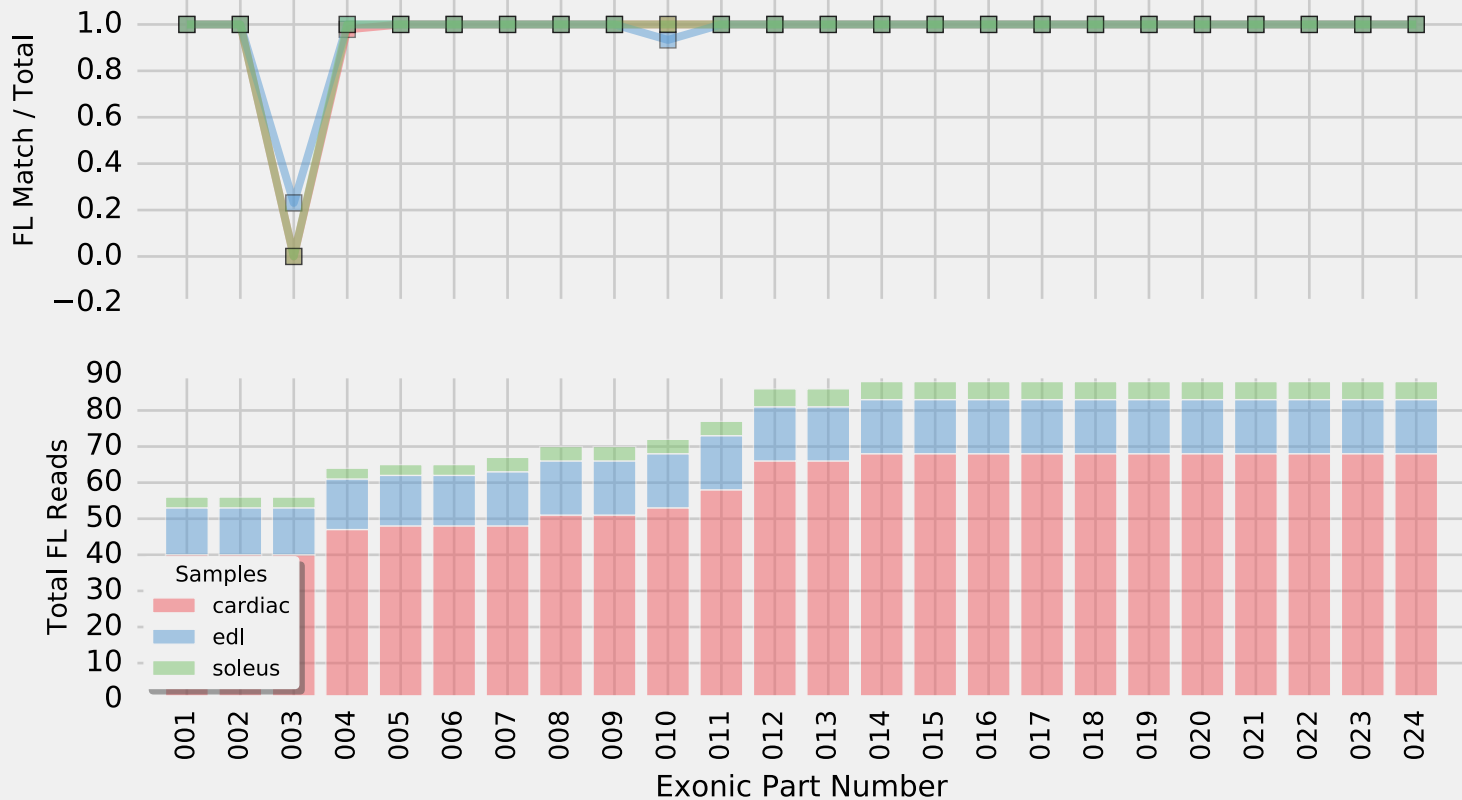

# Otud4

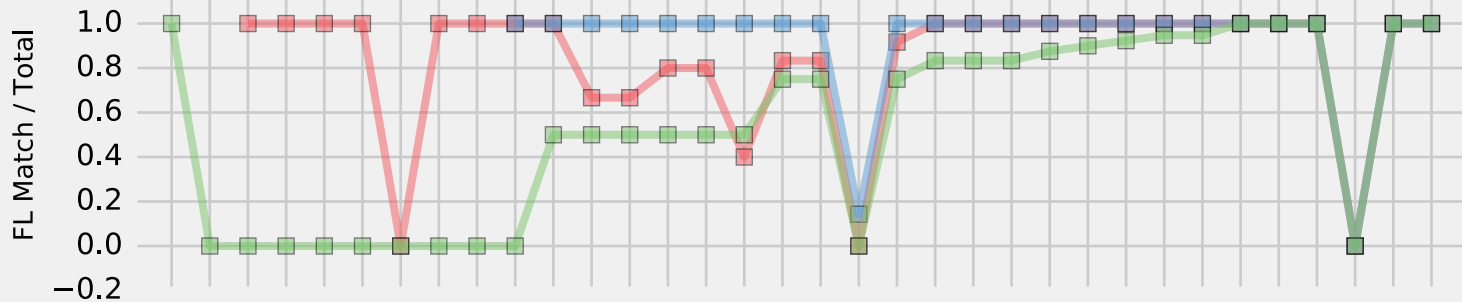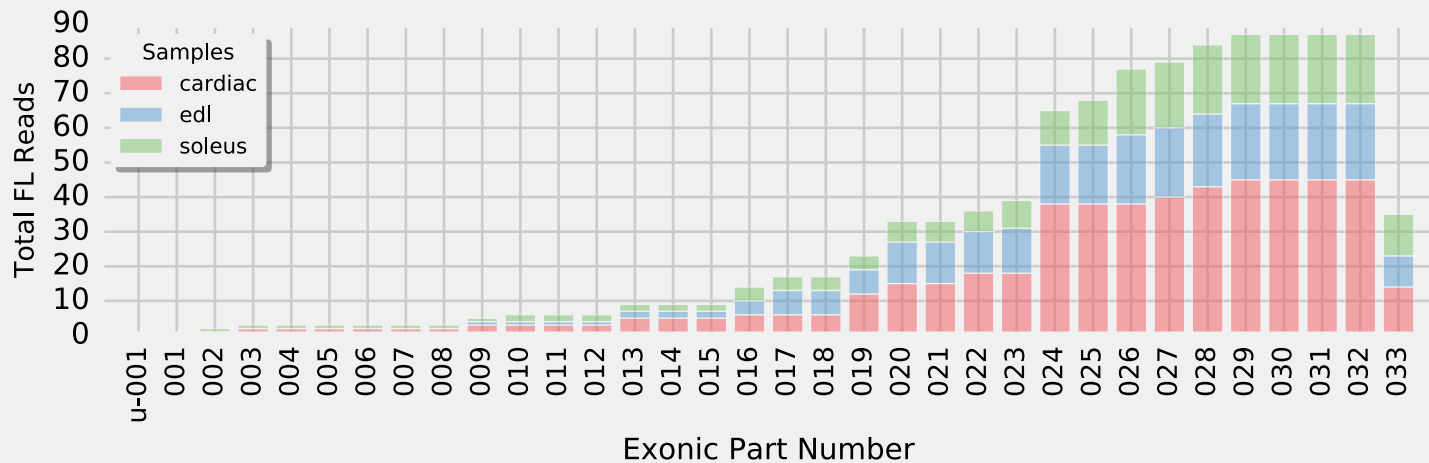

# Otud7b

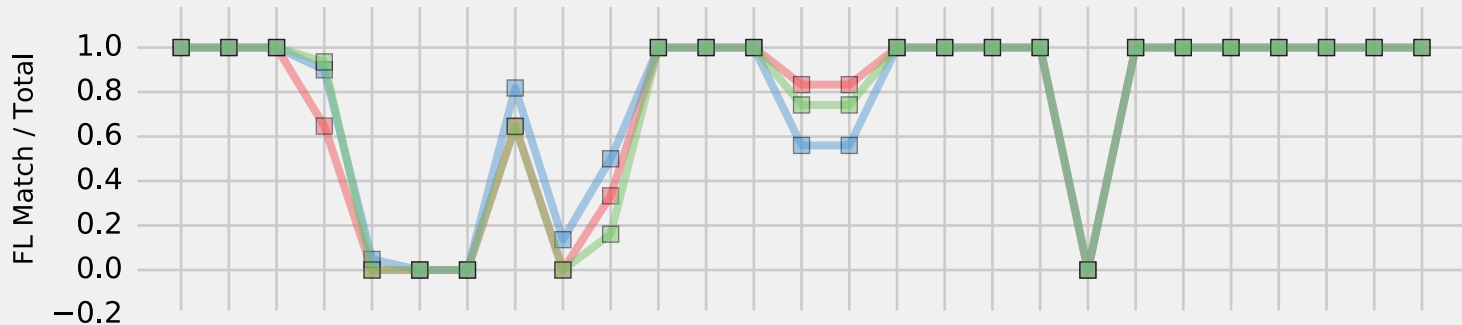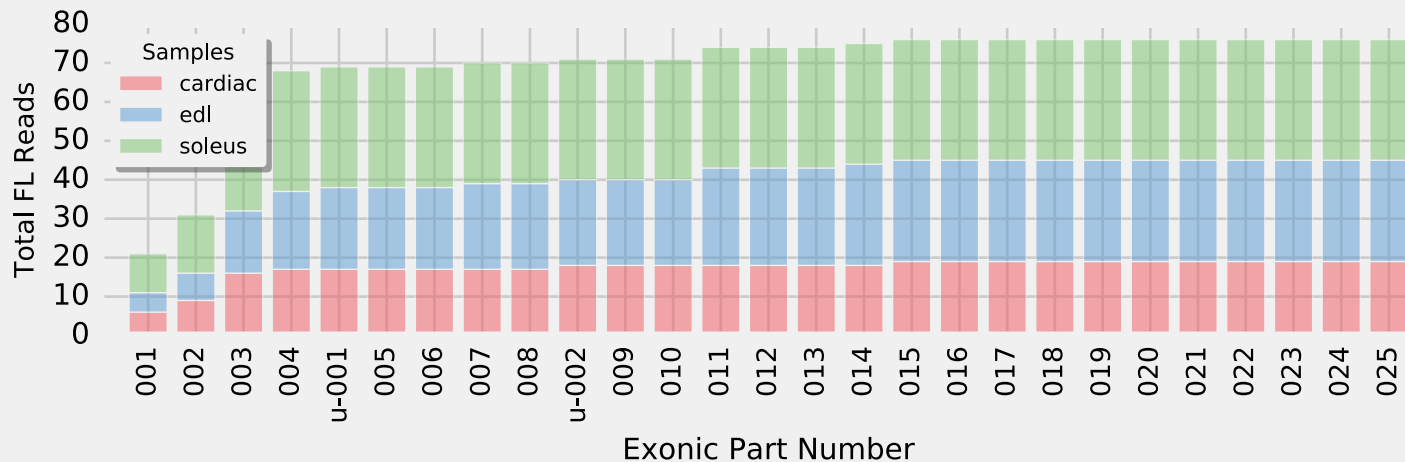

# P2ry1

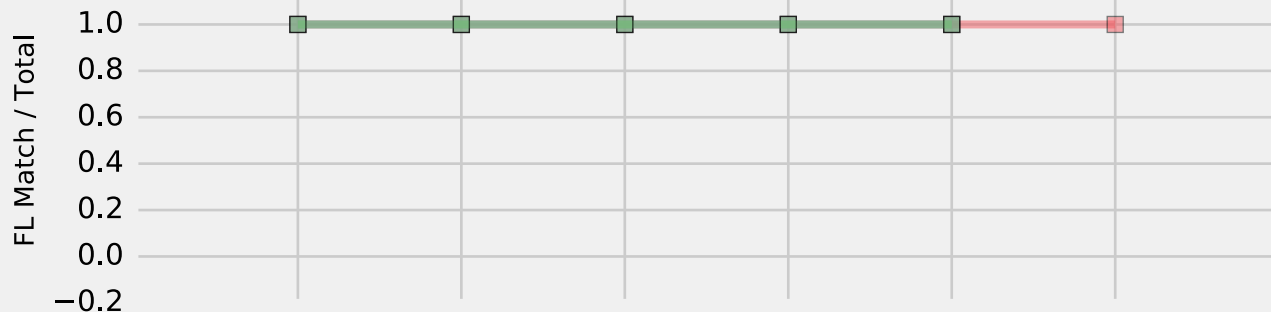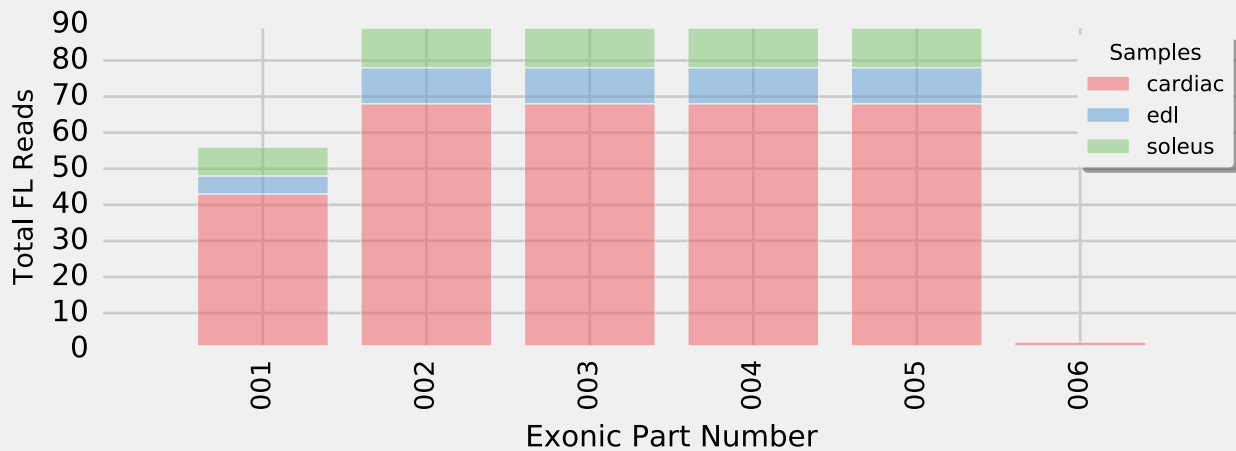

# Pafah1b1

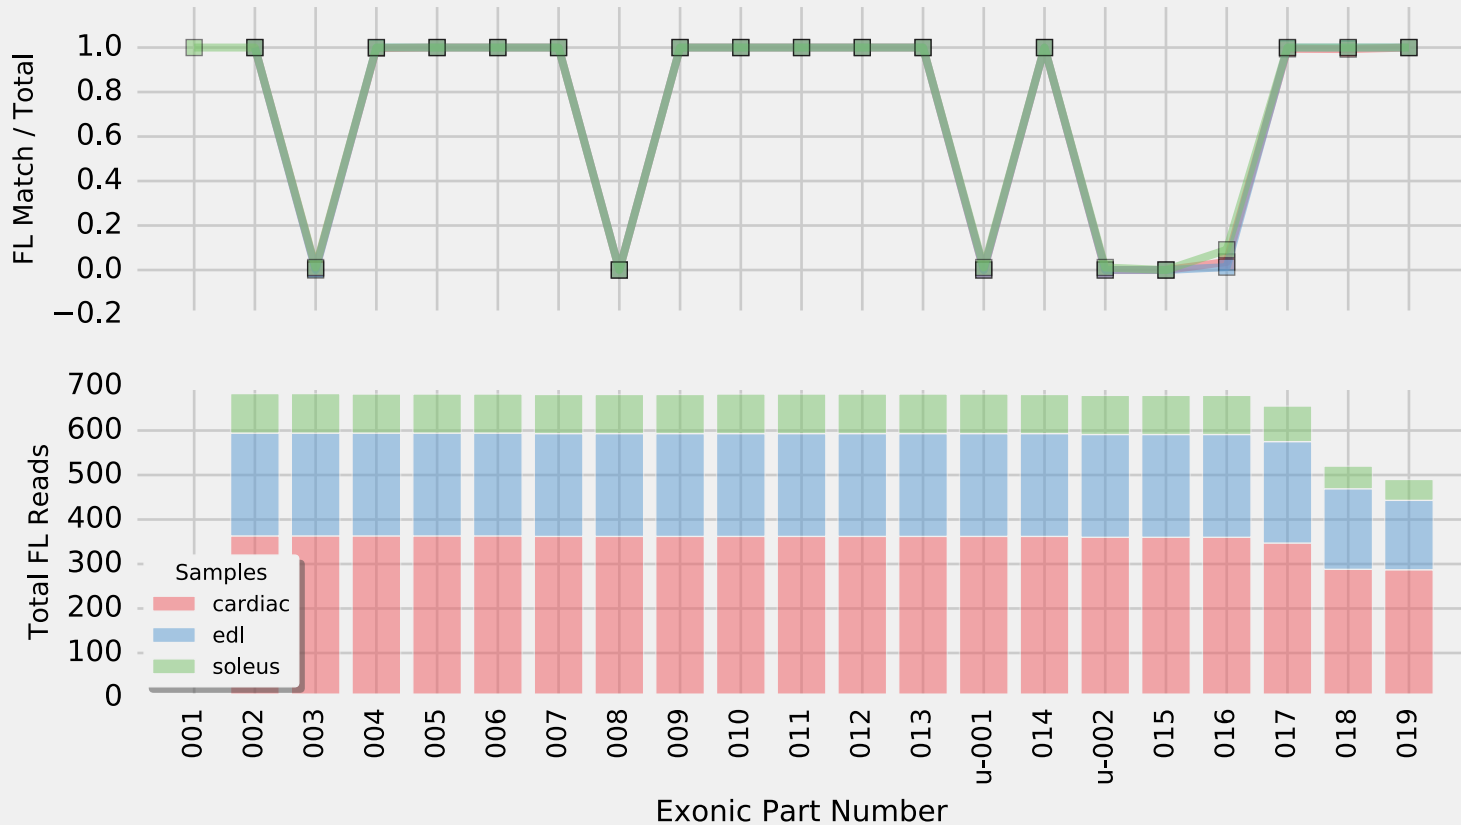

# Pak2

FL Match / Total

1.0  
0.8  
0.6  
0.4  
0.2  
0.0  
-0.2

Total FL Reads

90  
80  
70  
60  
50  
40  
30  
20  
10  
0

Samples

cardiac

edl

soleus

001 002 003 004 005 006 007 008 009 010 011 012 013 014 015 016 017

Exonic Part Number

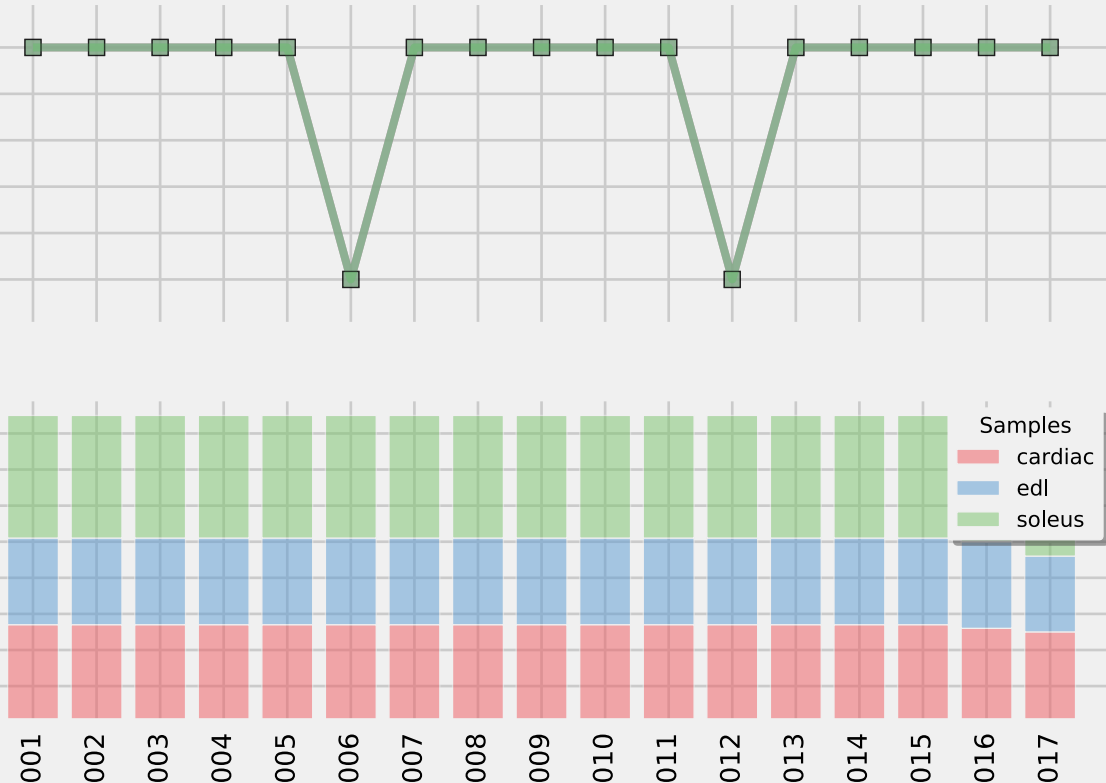

# Pcgf5

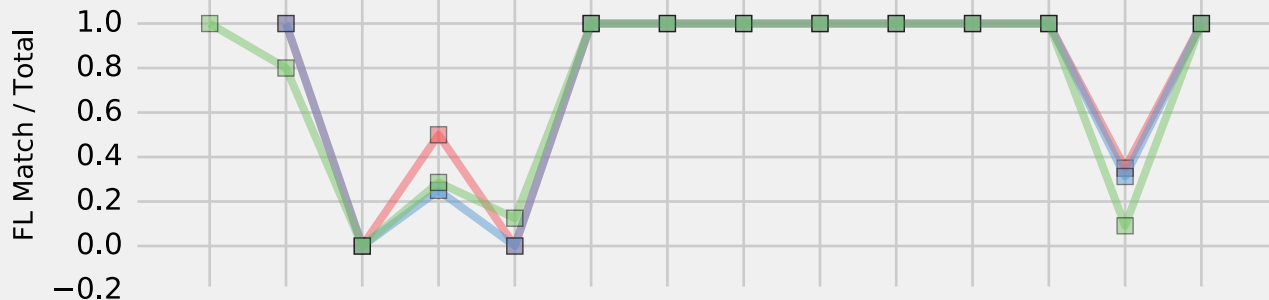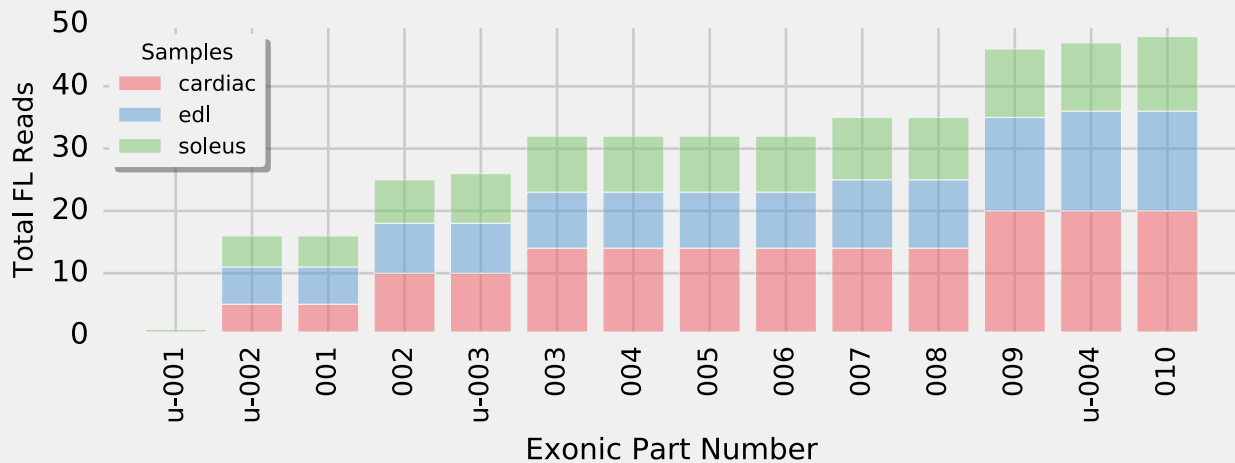



# Pcif1

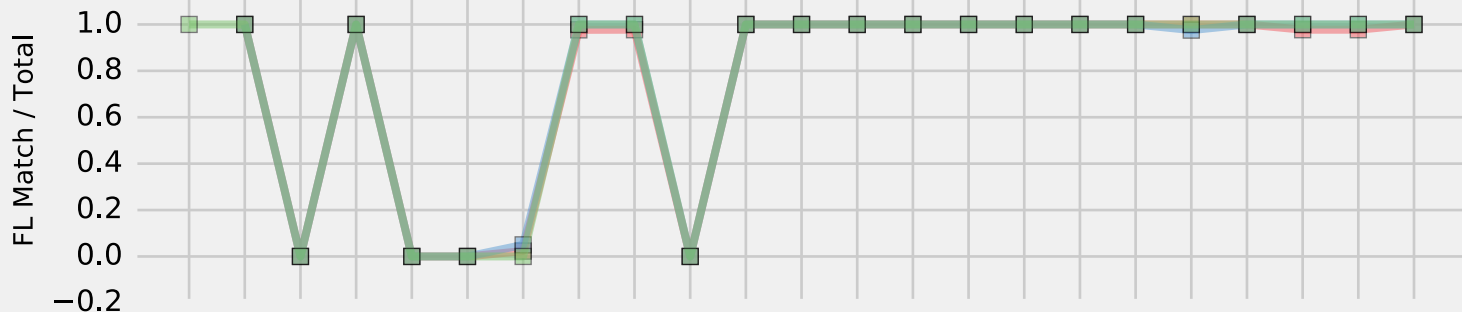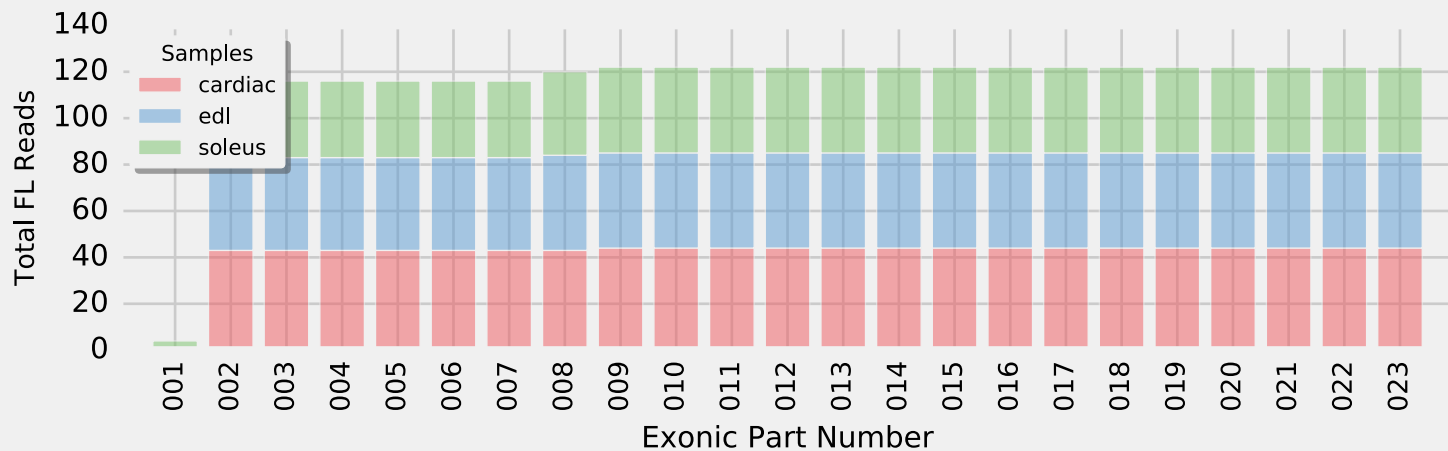

# Pcm1

FL Match / Total

-

Total FL Reads

Exonic Part Number

Samples

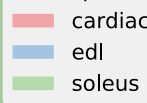

001 002 003 004 005 006 007 008 009 010 011 012 013 014 015 016 017 018 019 020 021 022 023 024 025 026 027 028 029 030 031 032 033 034 035 036 037 038 039 040 041 042 043 044 045 046 047

1.0  
0.8  
0.6  
0.4  
0.2  
0.0  
-0.2

60  
50  
40  
30  
20  
10  
0

# Pcnt

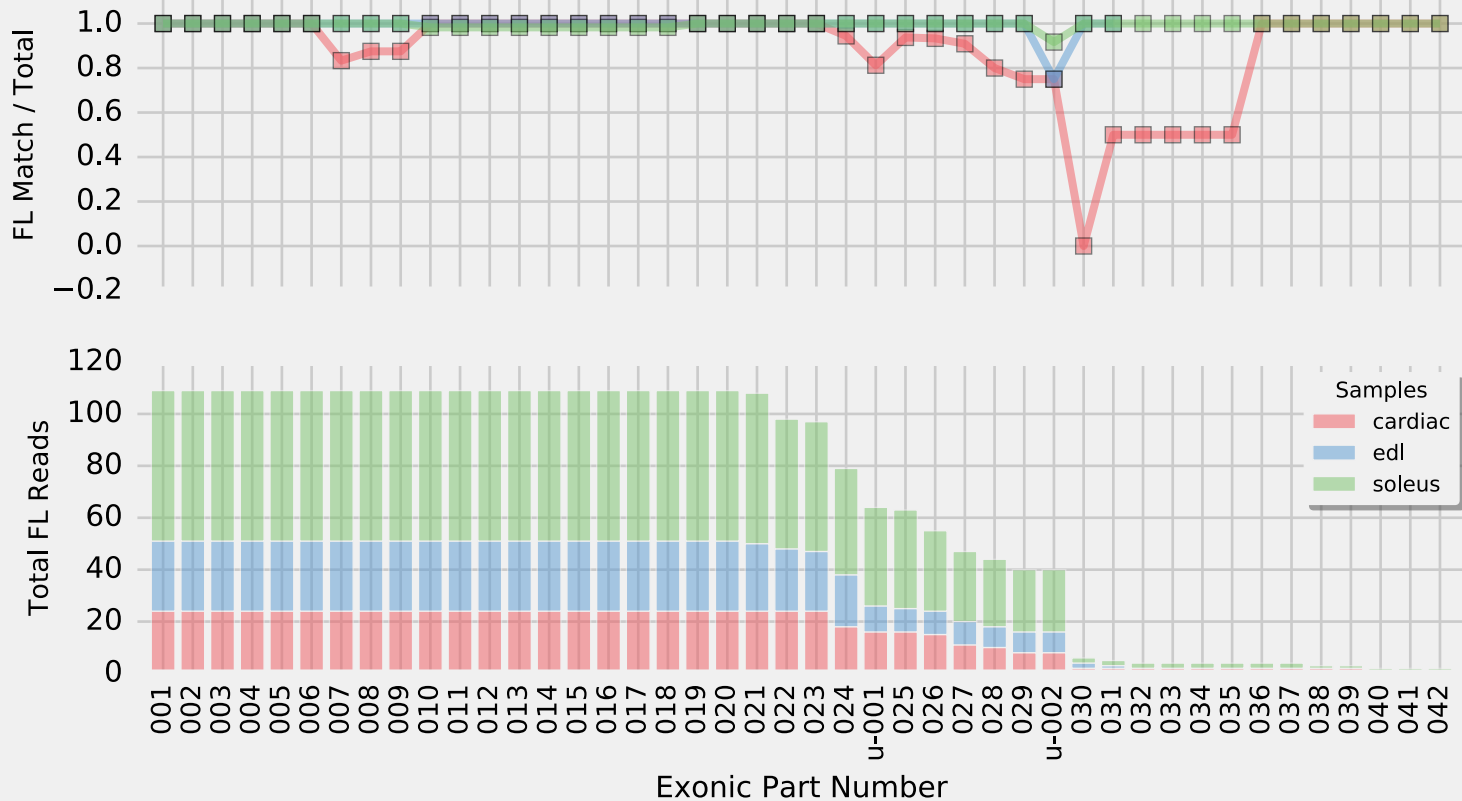

# Pcnx

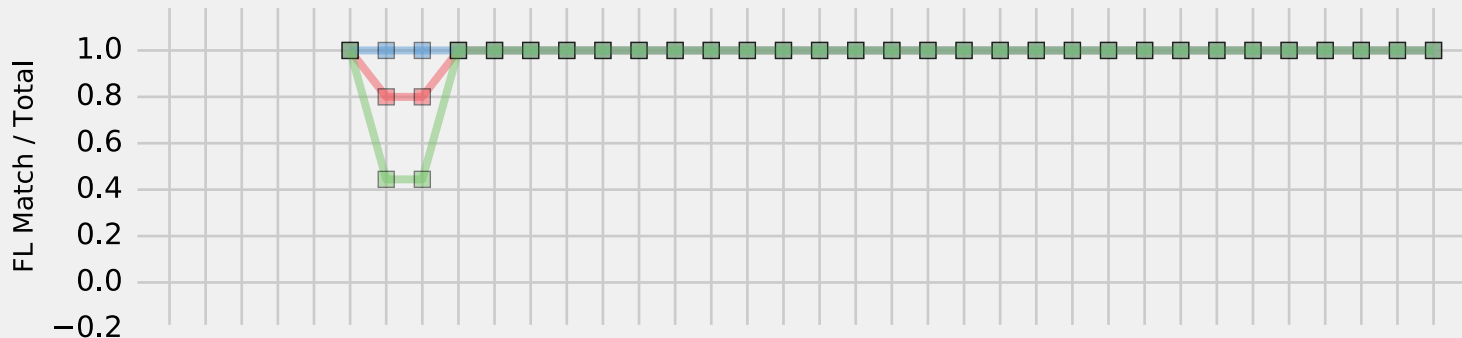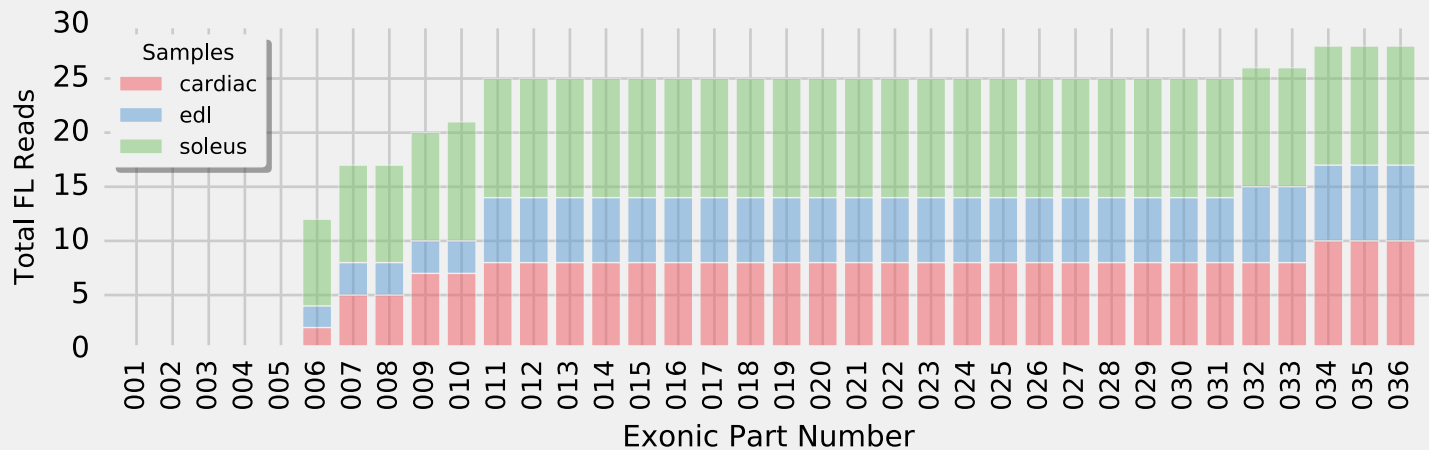

# Pde1c

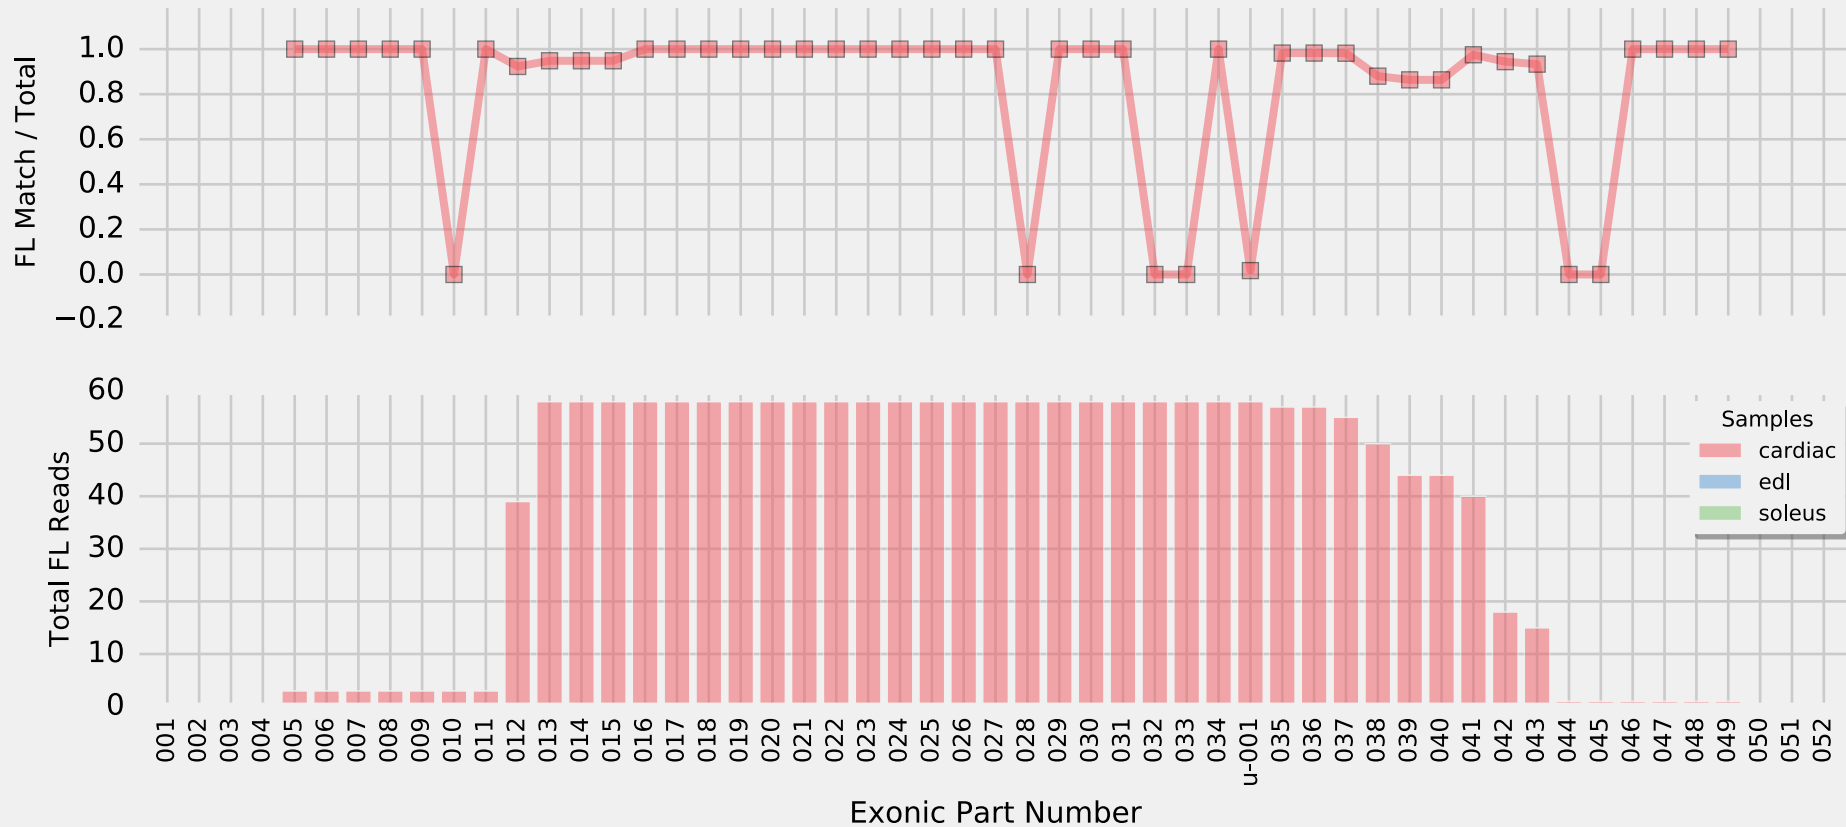

# Pde3a

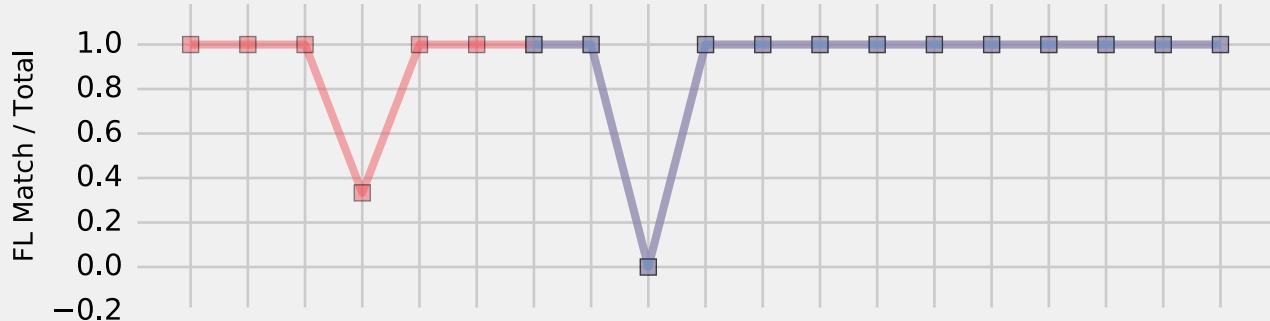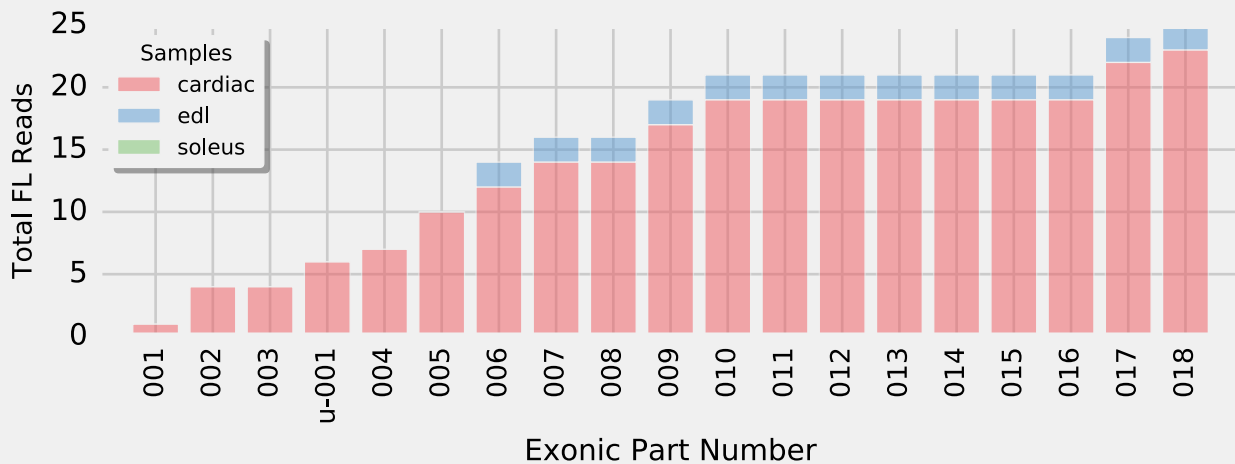

# Pde4d

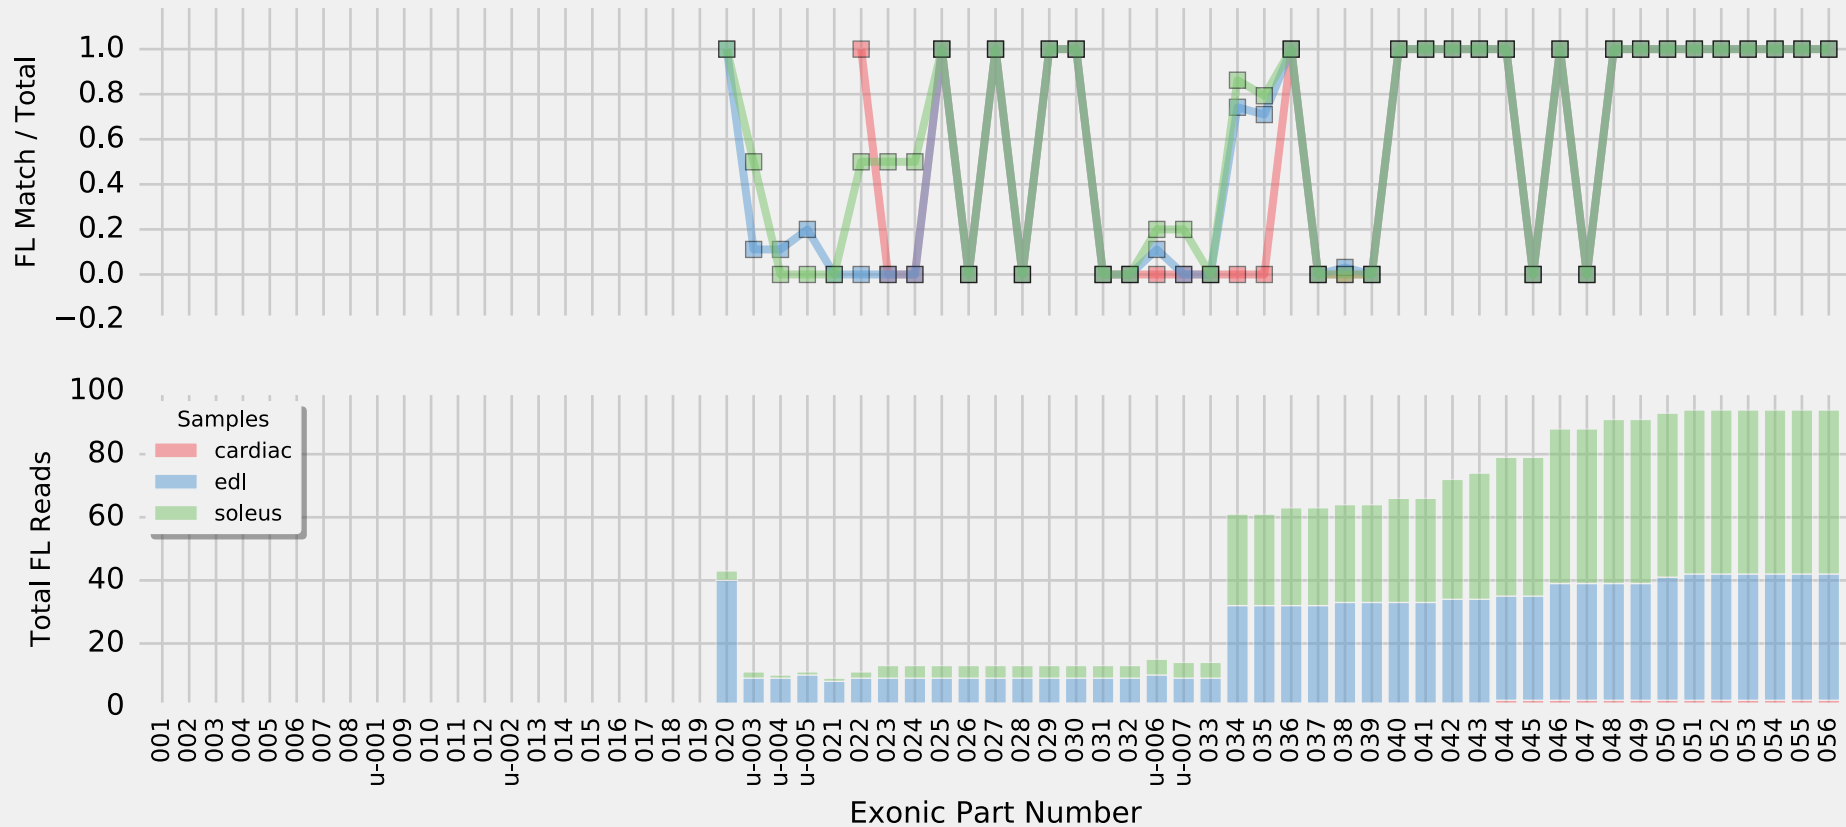

# Pde4dip

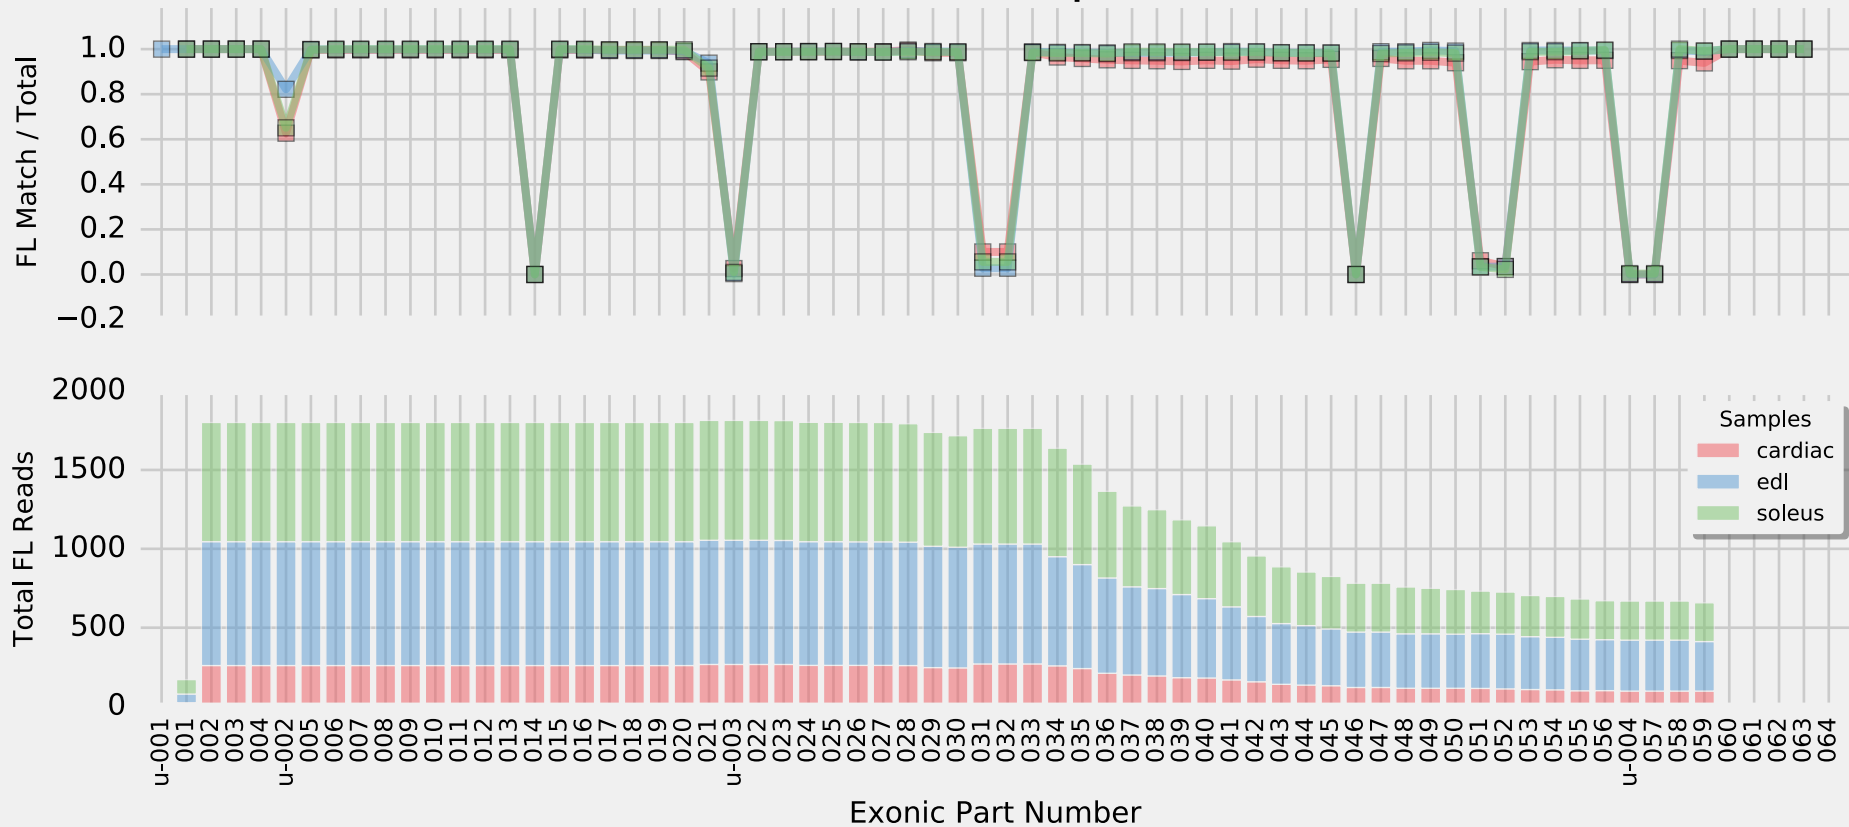



# Pde7a

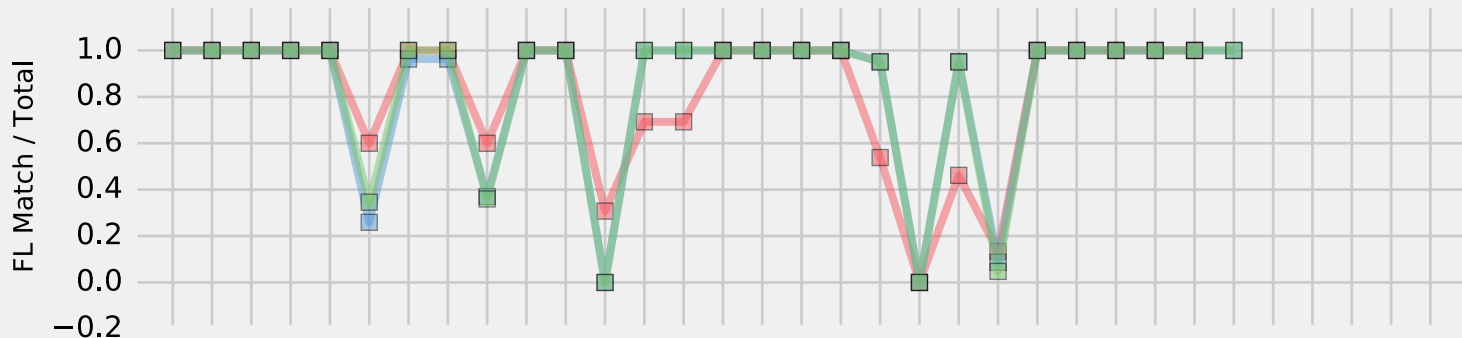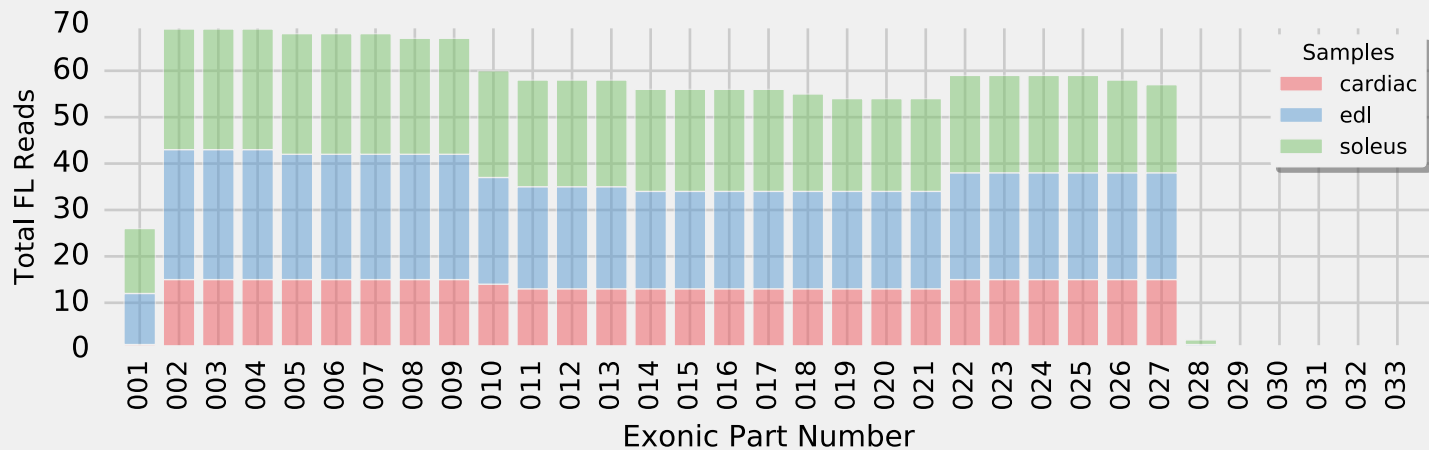

# Pdgfrb

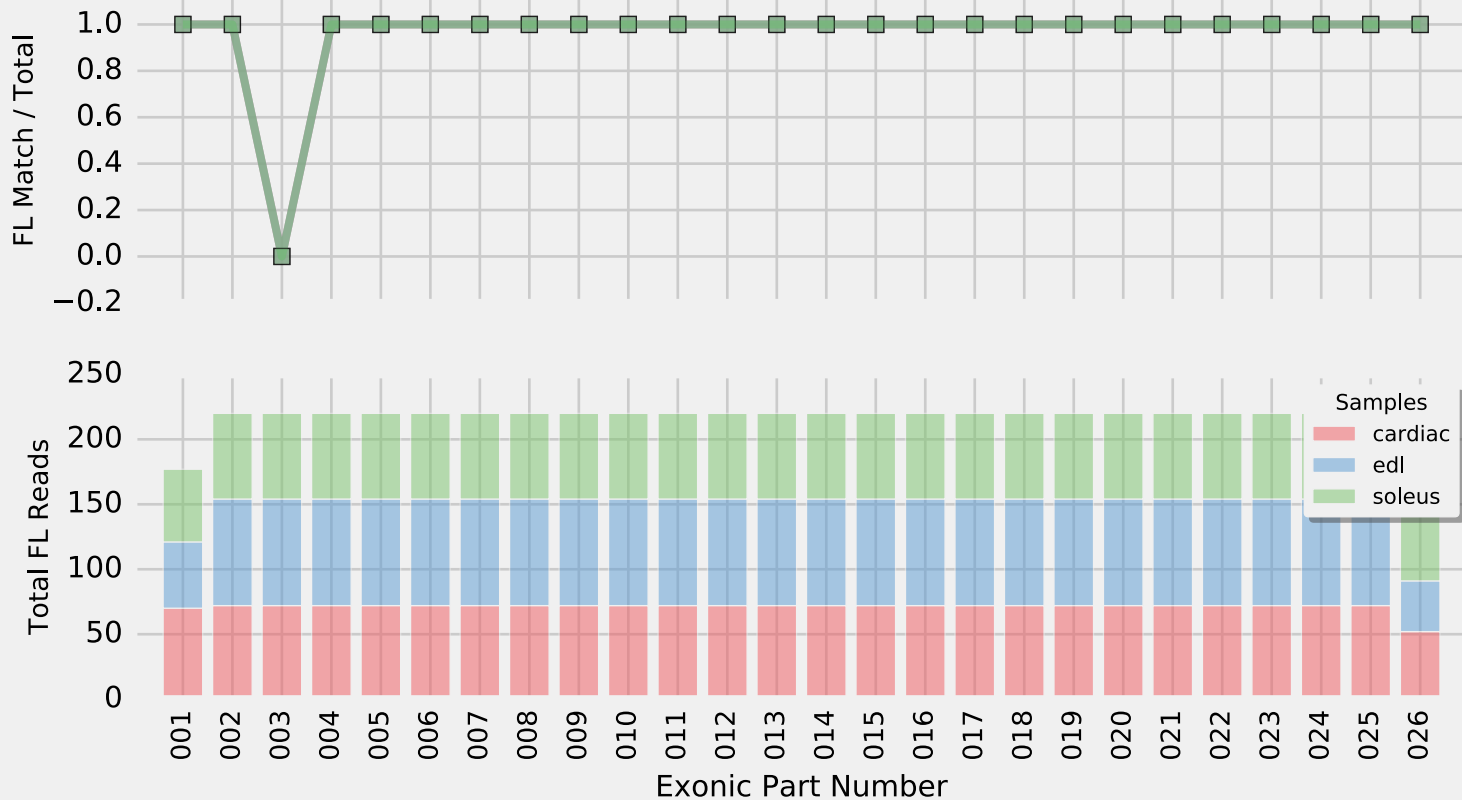

# Pdk1

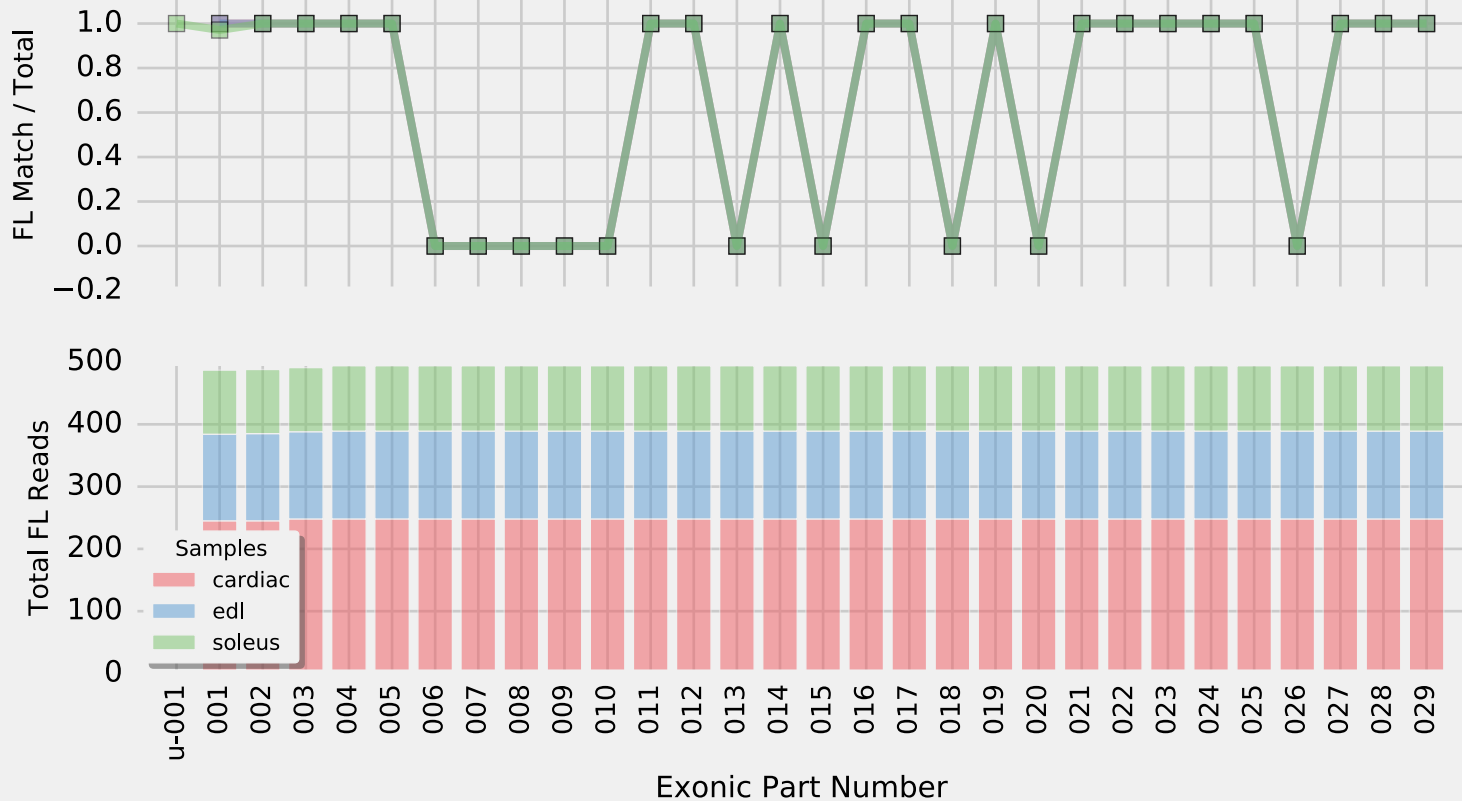

# Pdprk1

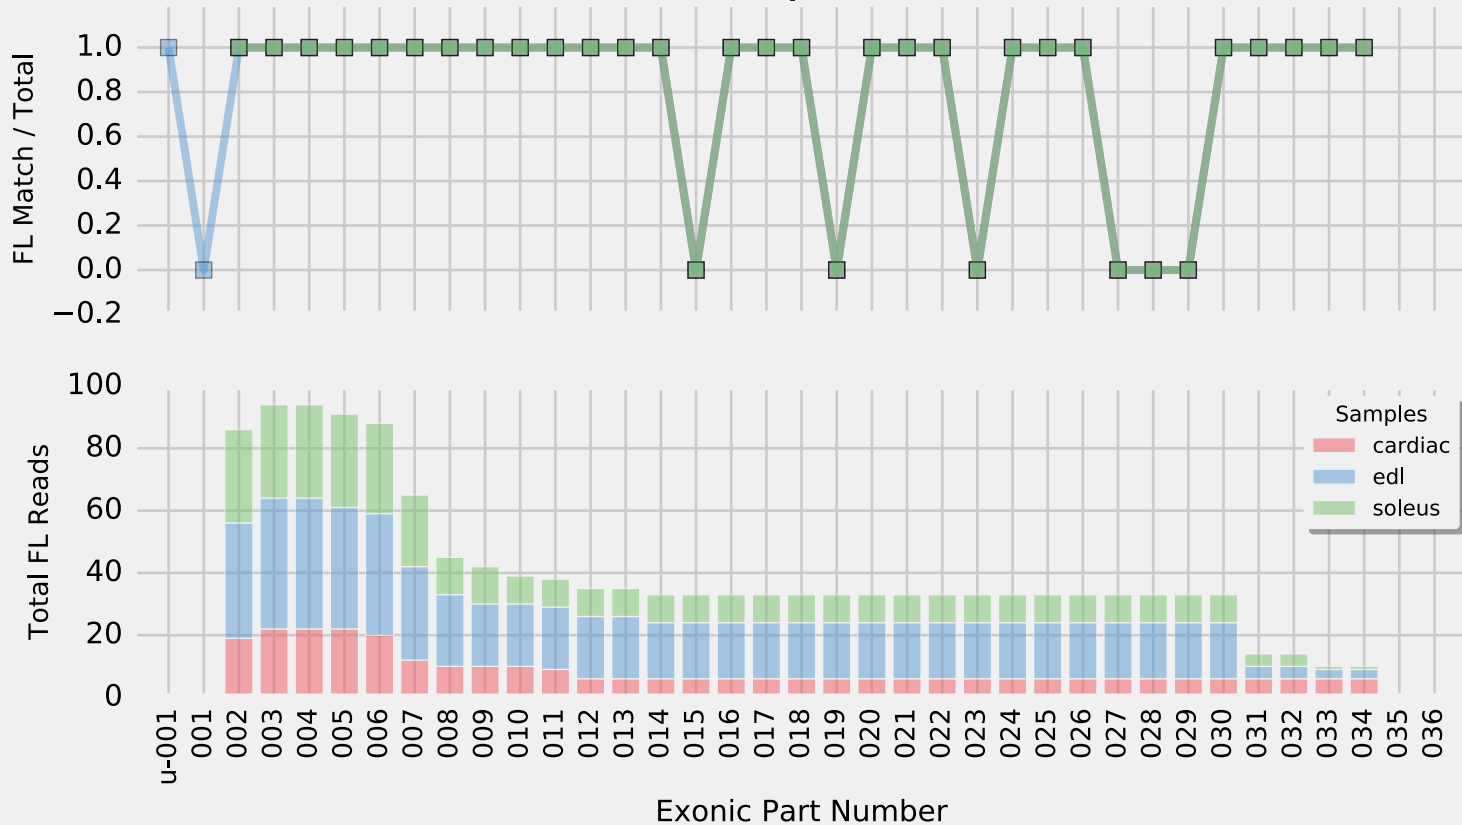

# Pdpr

FL Match / Total

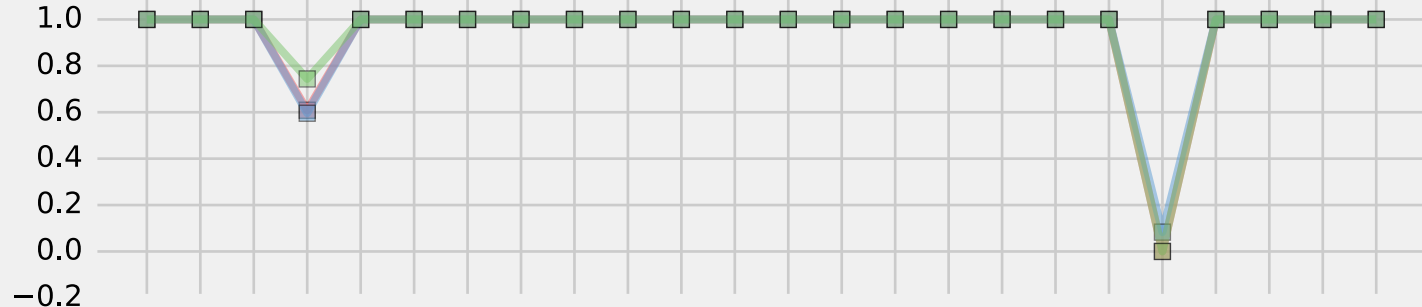

Total FL Reads

Samples

cardiac  
edl  
soleus

Exonic Part Number

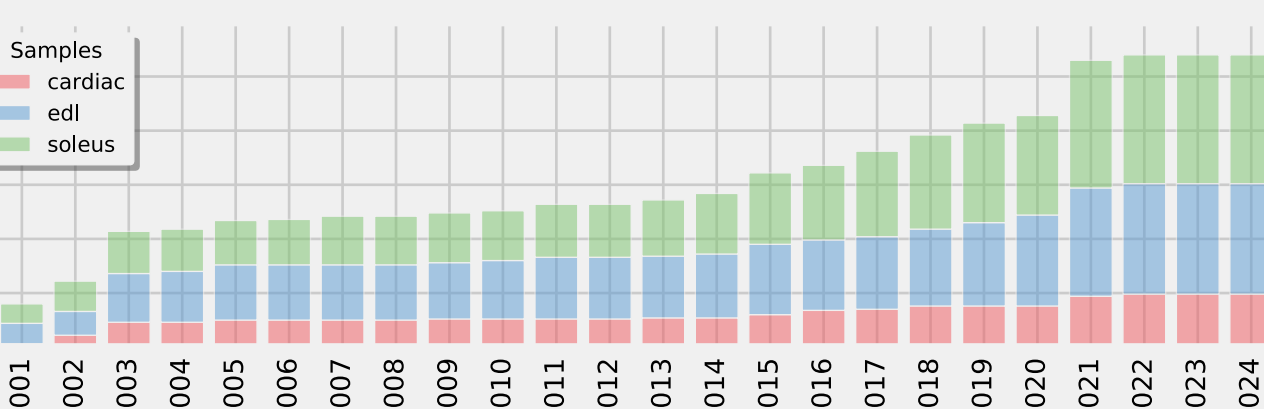

# Pds5a

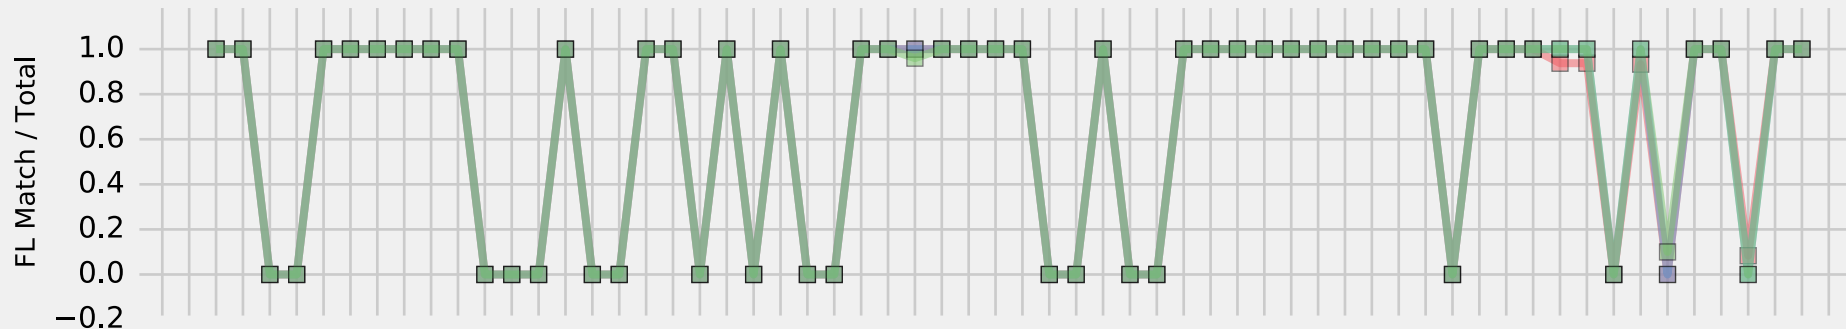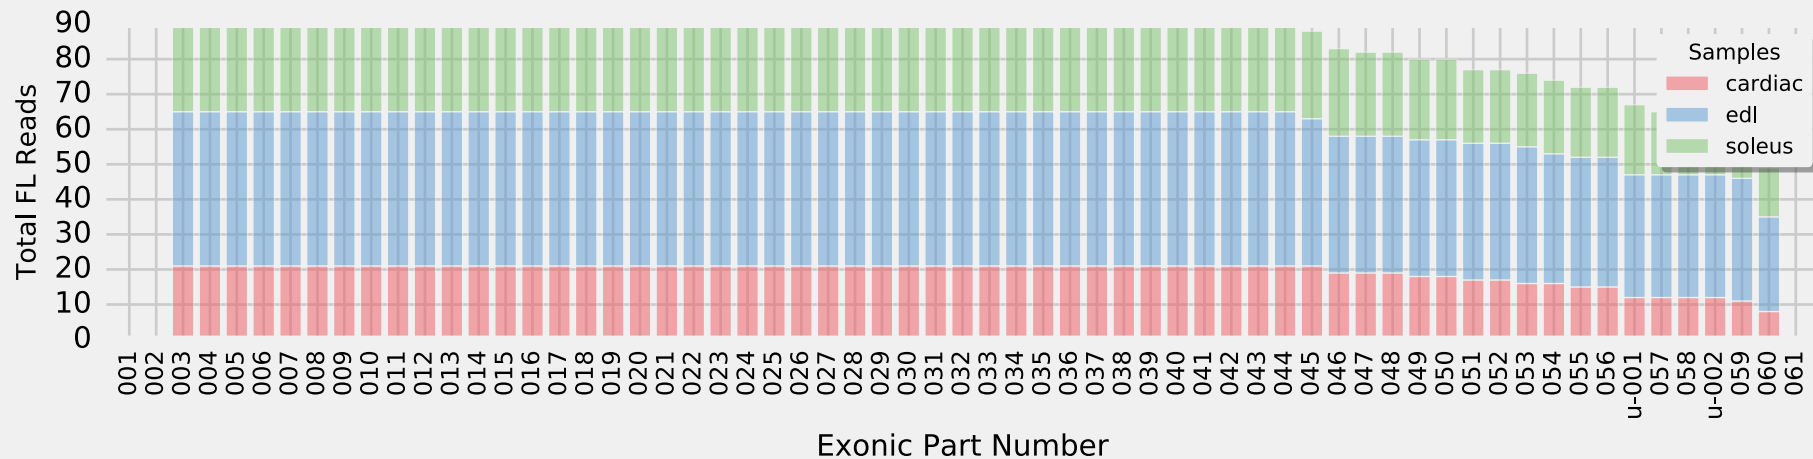

# Pds5b

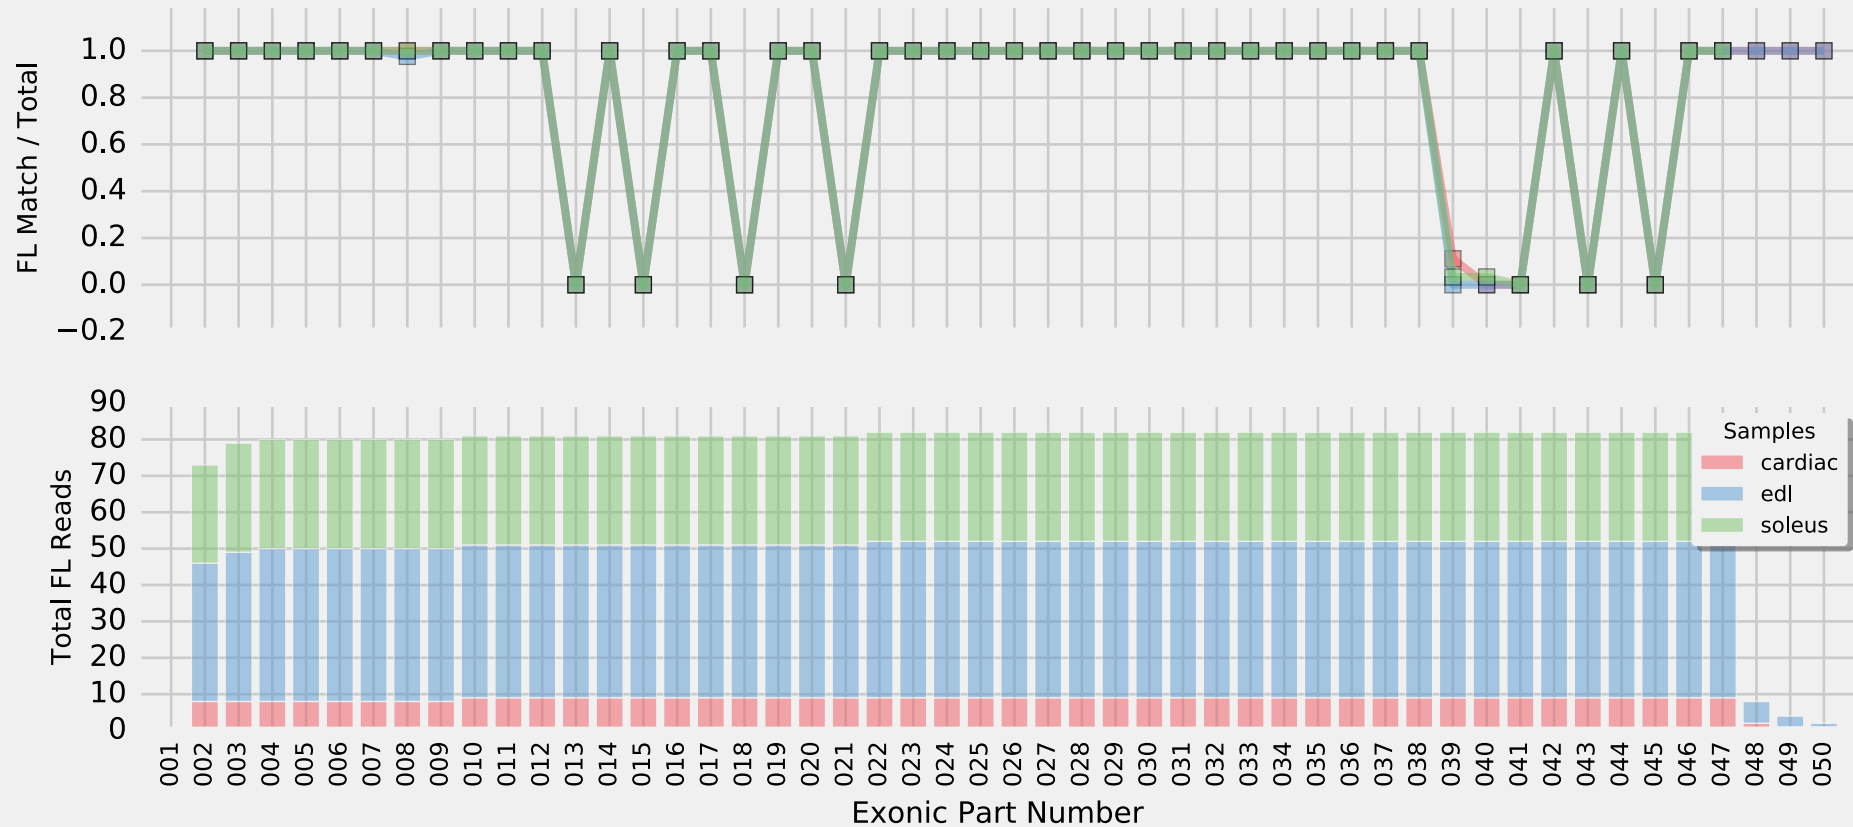

# Peg3

FL Match / Total

1.0  
0.8  
0.6  
0.4  
0.2  
0.0  
-0.2

Total FL Reads

70  
60  
50  
40  
30  
20  
10  
0

Samples

cardiac  
edl  
soleus

Exonic Part Number

001 002 003 004 005 006 007 008 009 010 011 012 013 014 015 016 017

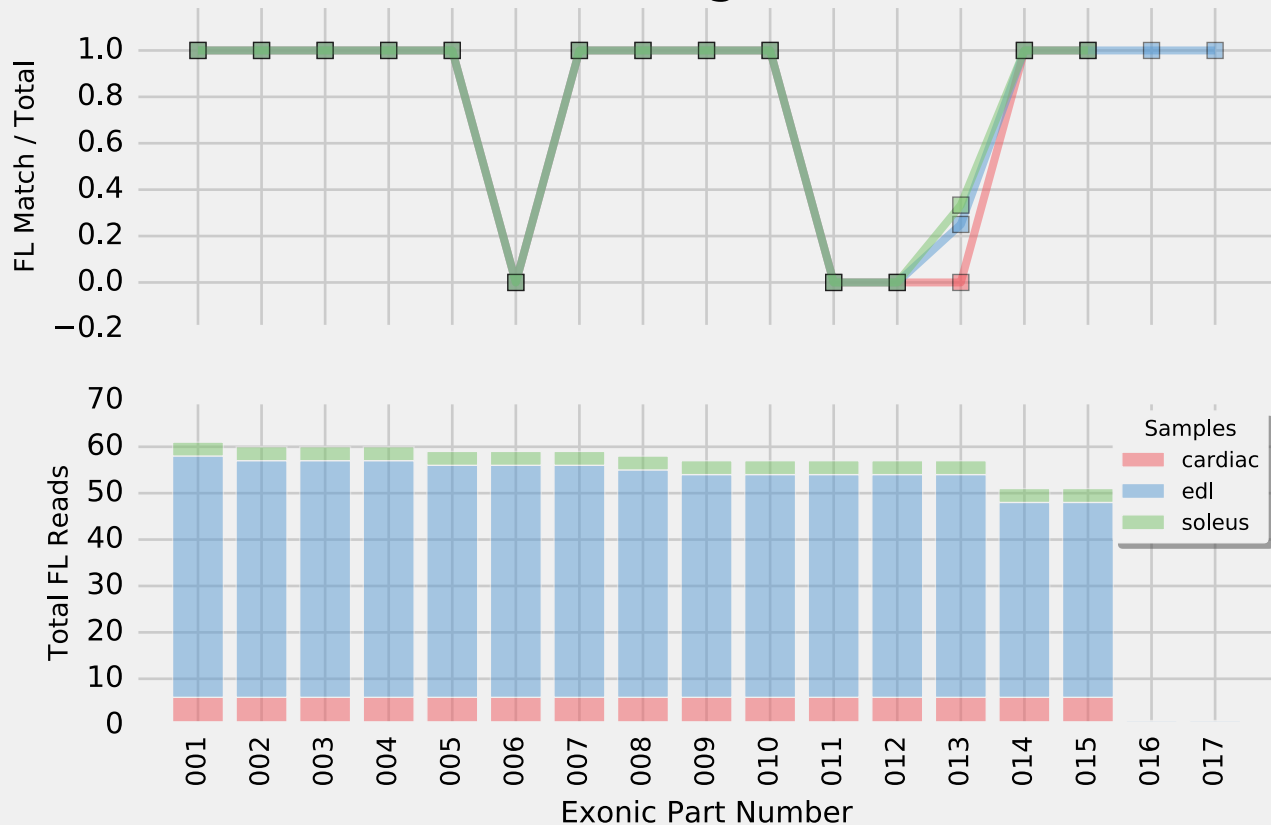



# Per2

FL Match / Total

1.0  
0.8  
0.6  
0.4  
0.2  
0.0  
-0.2

Total FL Reads

Samples  
cardiac  
edl  
soleus

001 002 003 004 005 006 007 008 009 010 011 012 013 014 015 016 017 018 019 u-001 020 021 022 023 024 025

Exonic Part Number

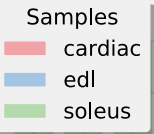

# Pggt1b

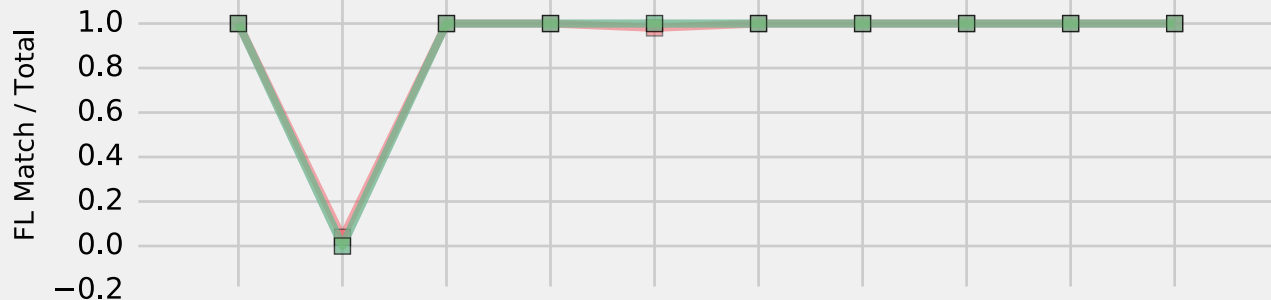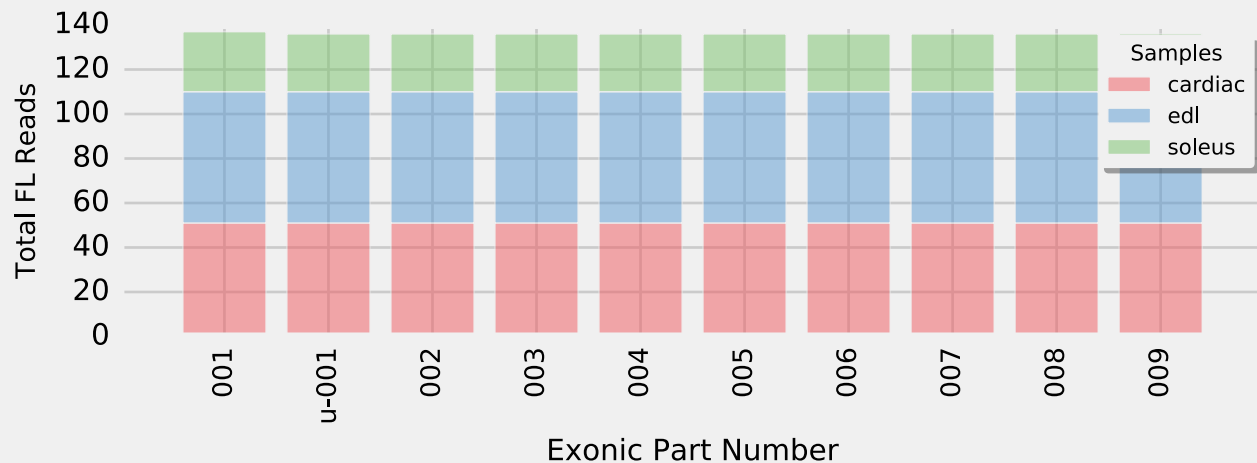

# Phf8

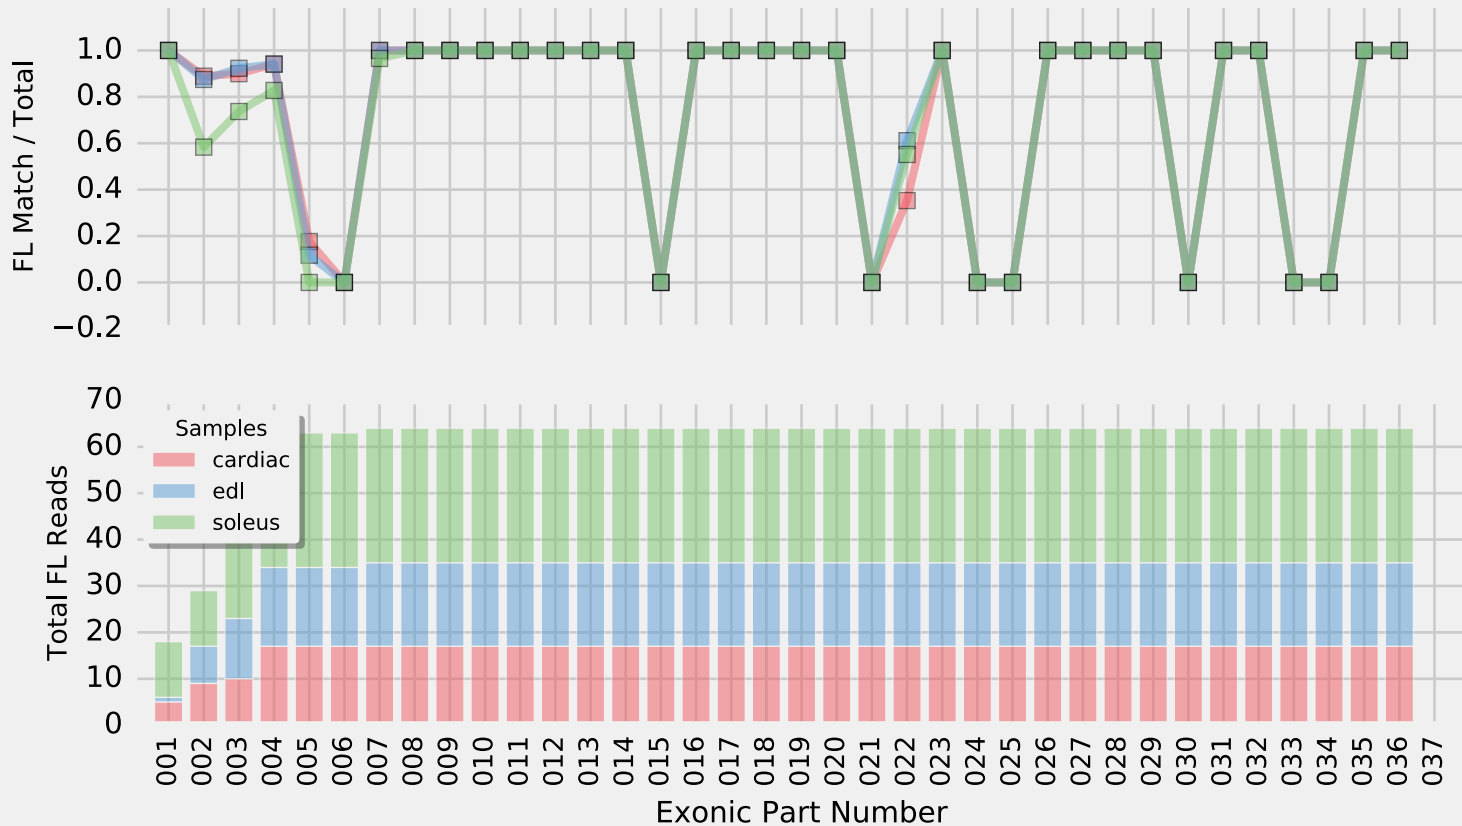

# Phka1

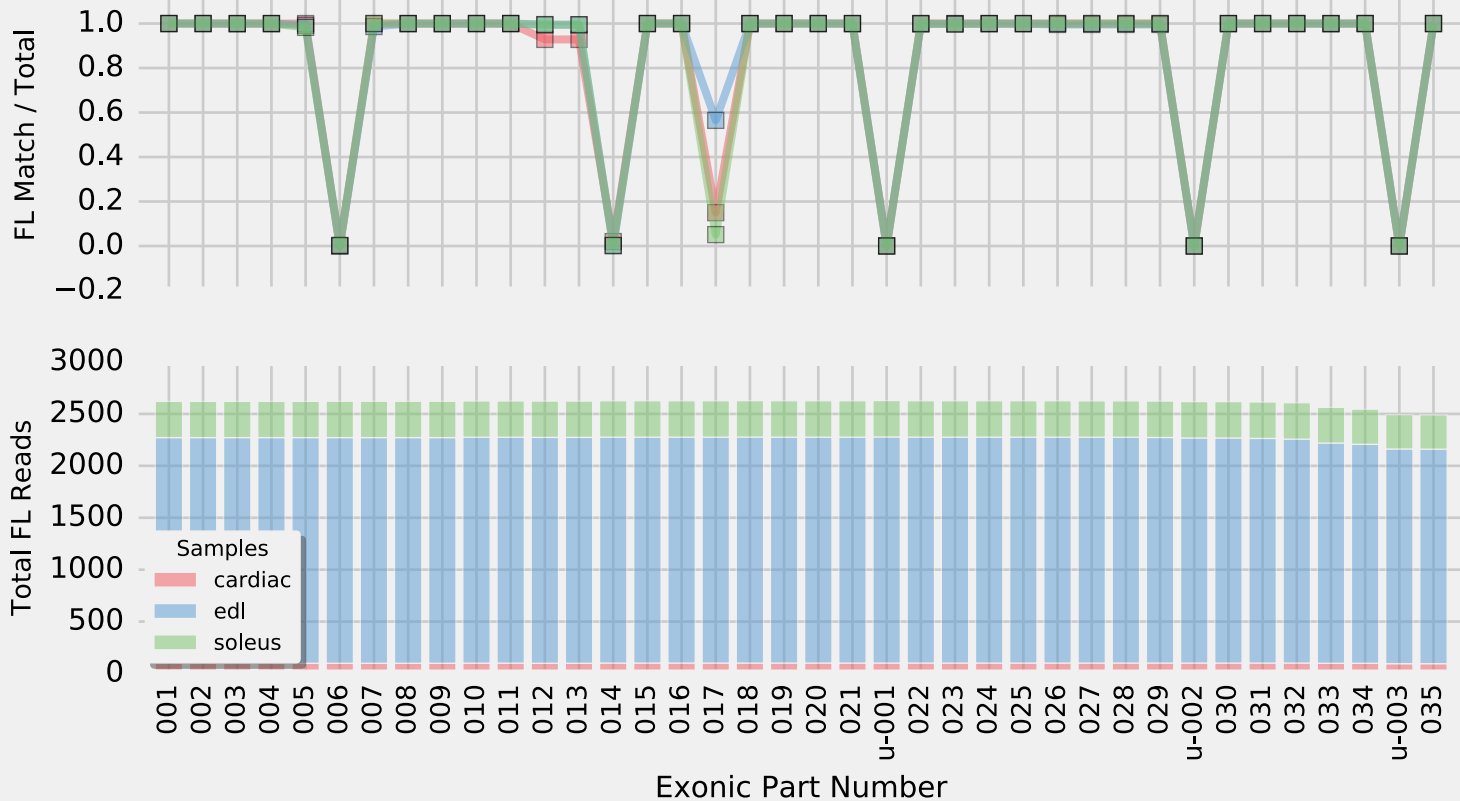

# Phkb

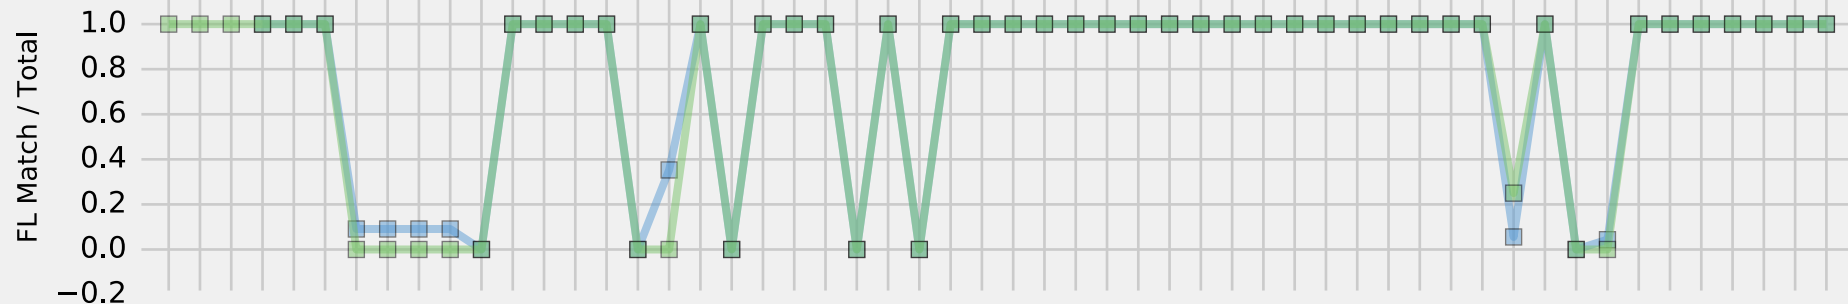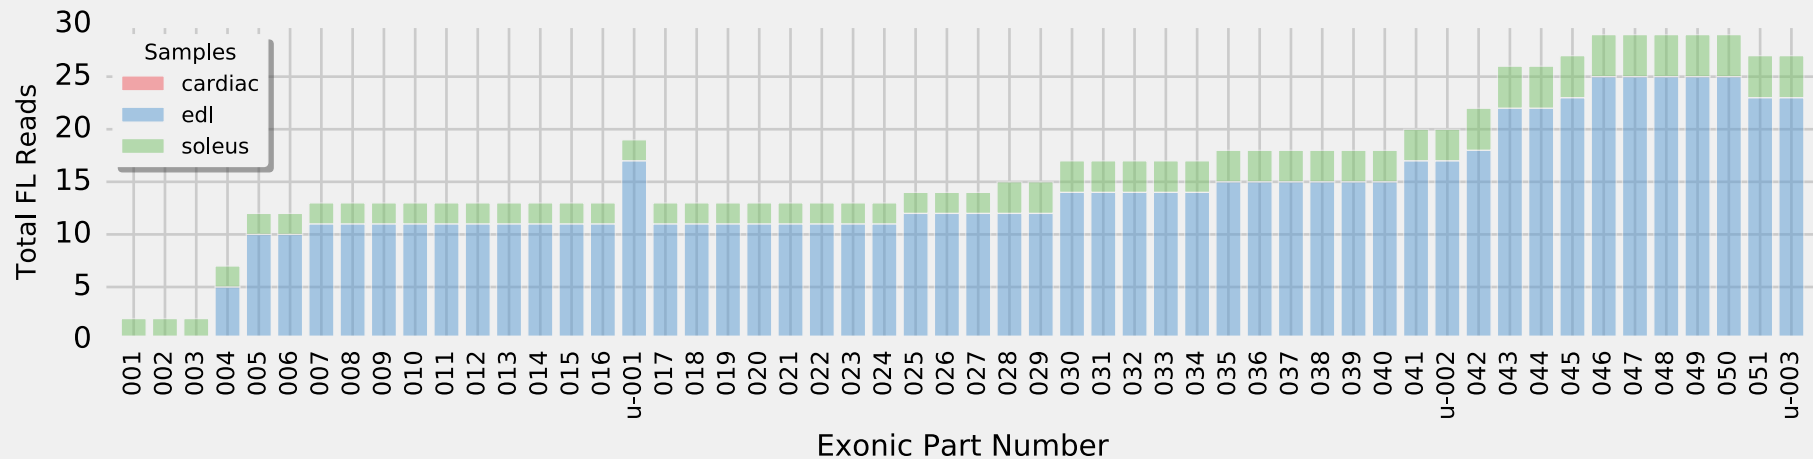

# Phldb1

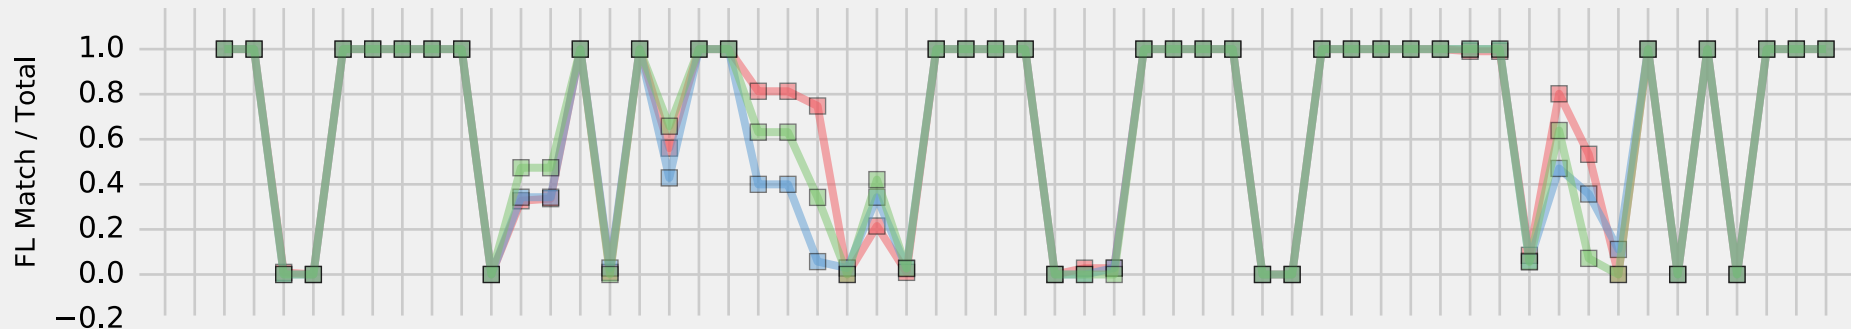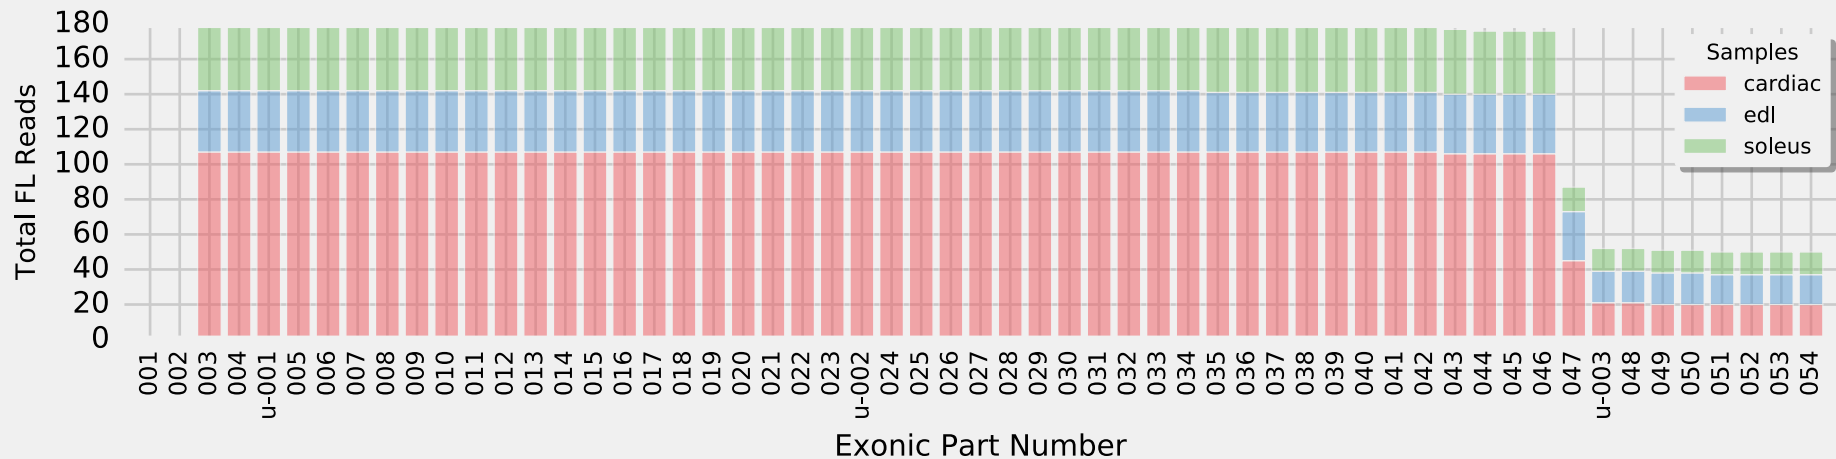

# Phrf1

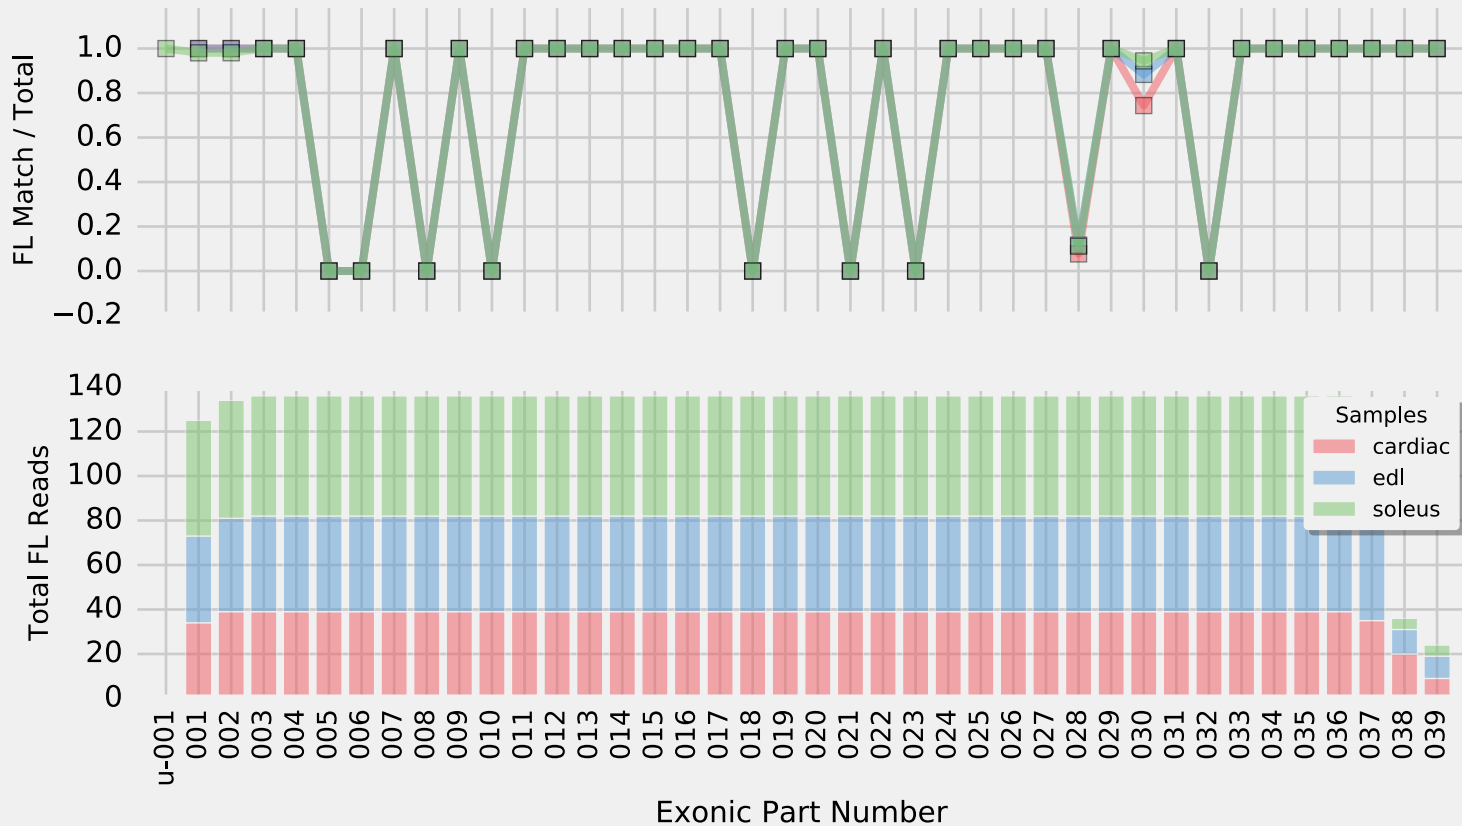

# Pi4ka

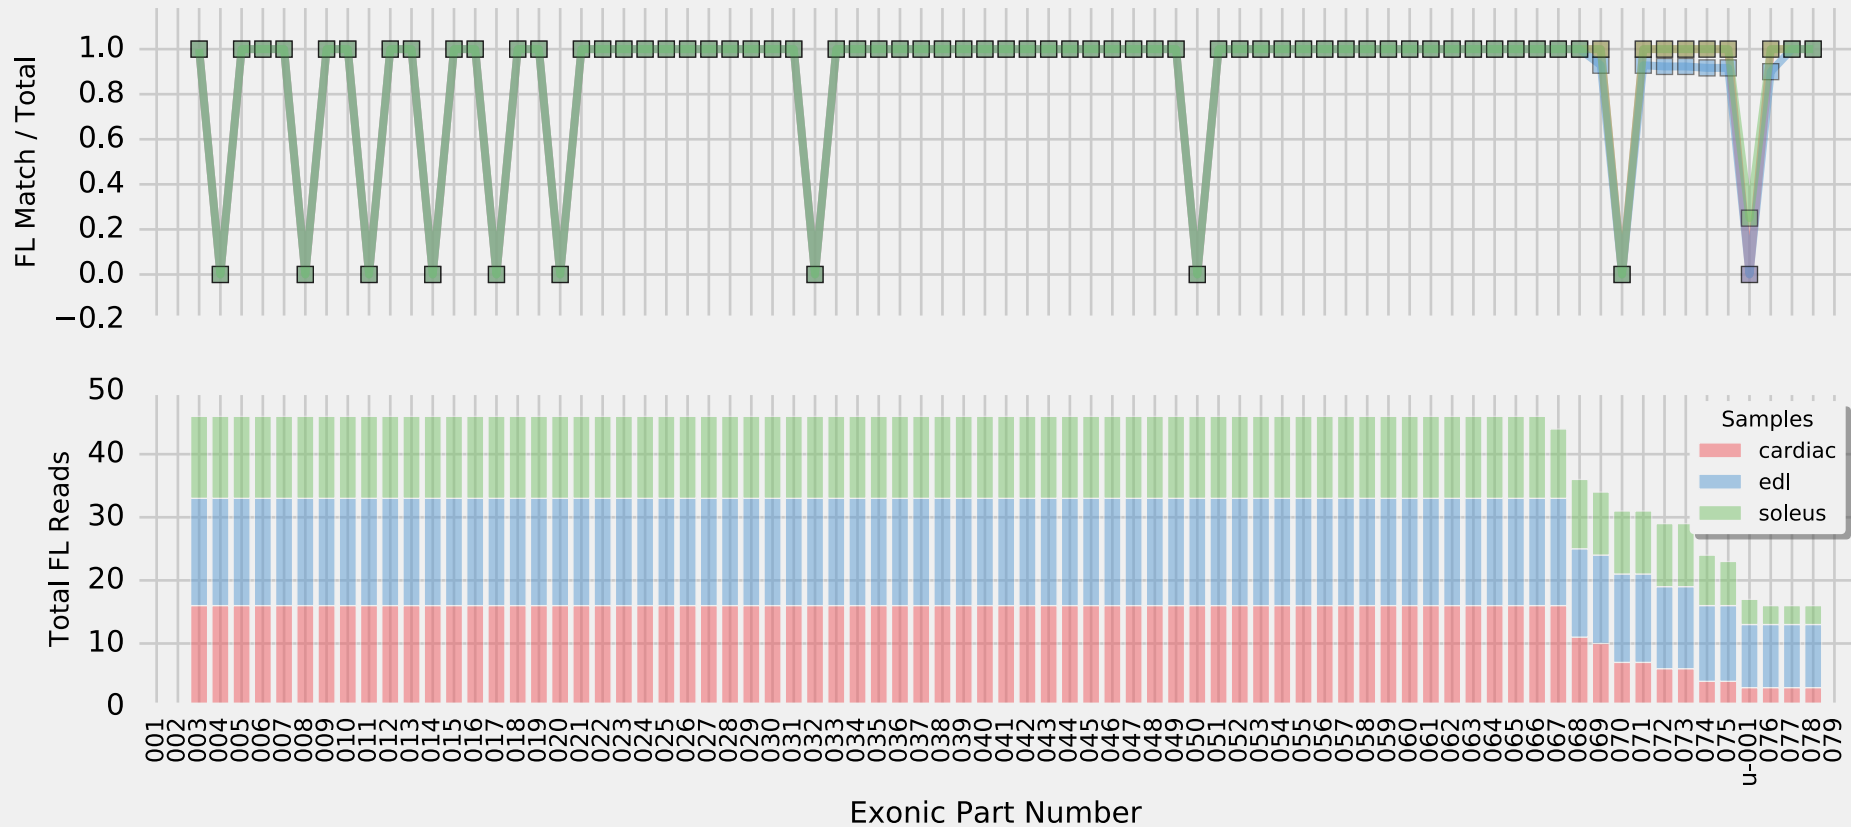



# Pik3r1

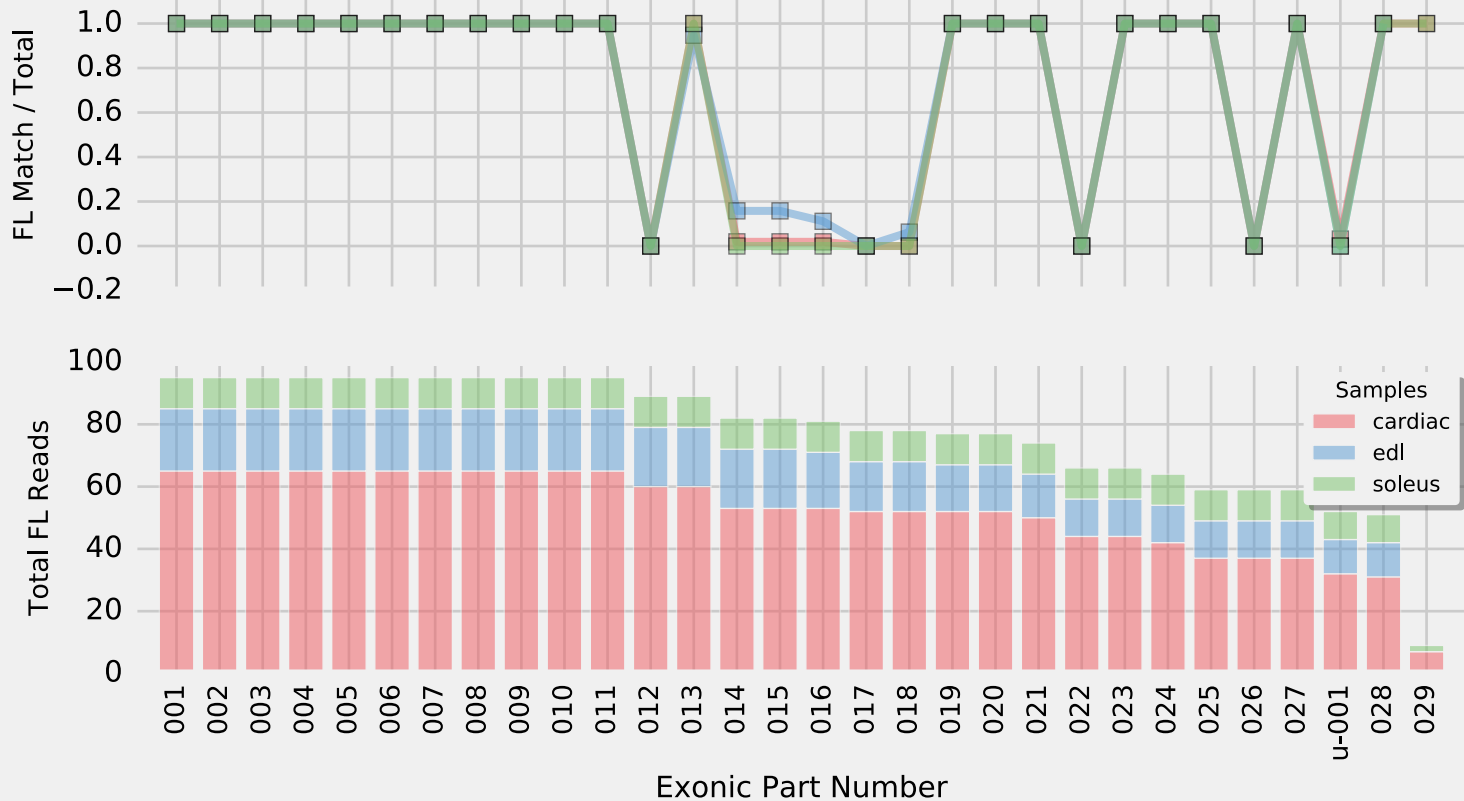

# Pkn2

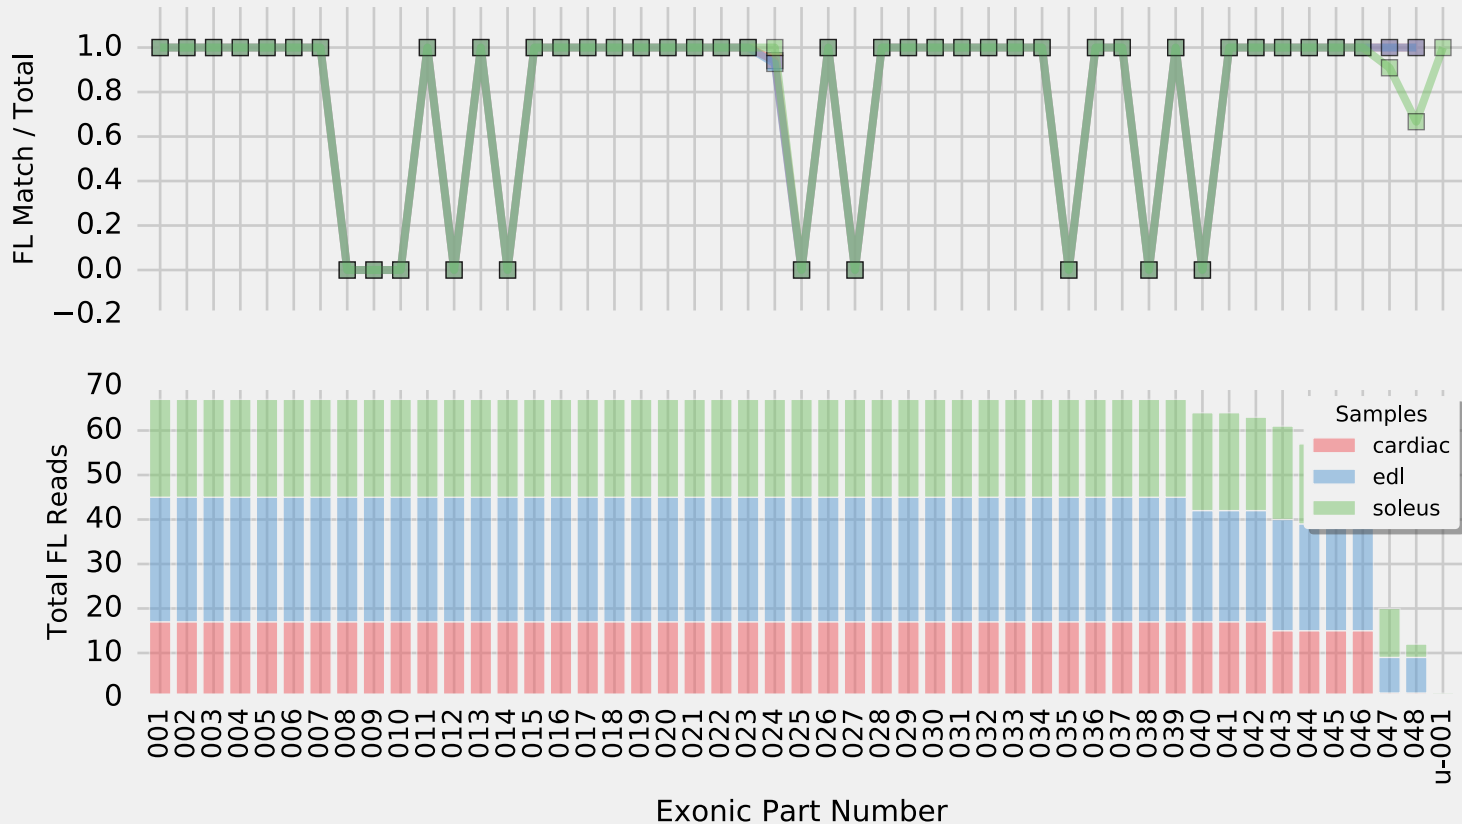

# Plcb4

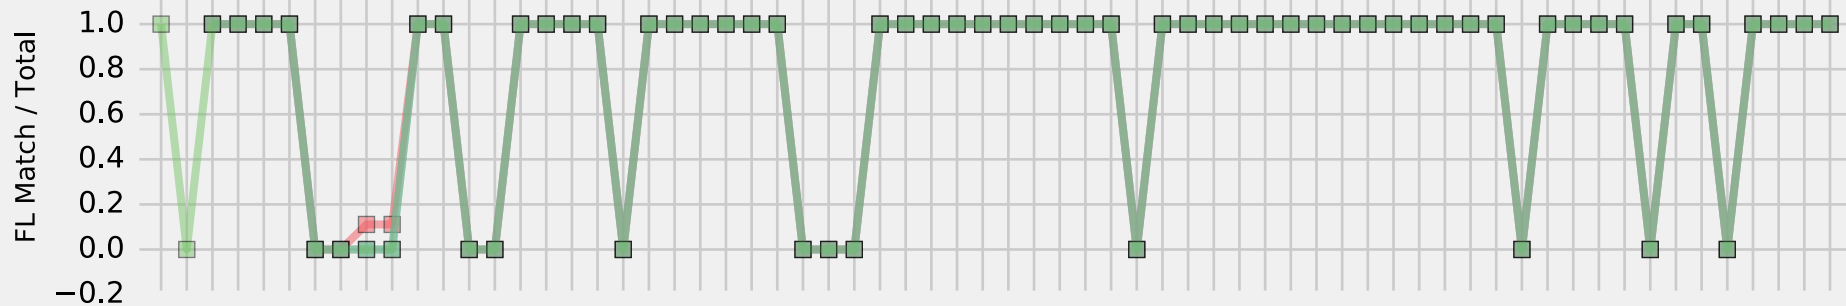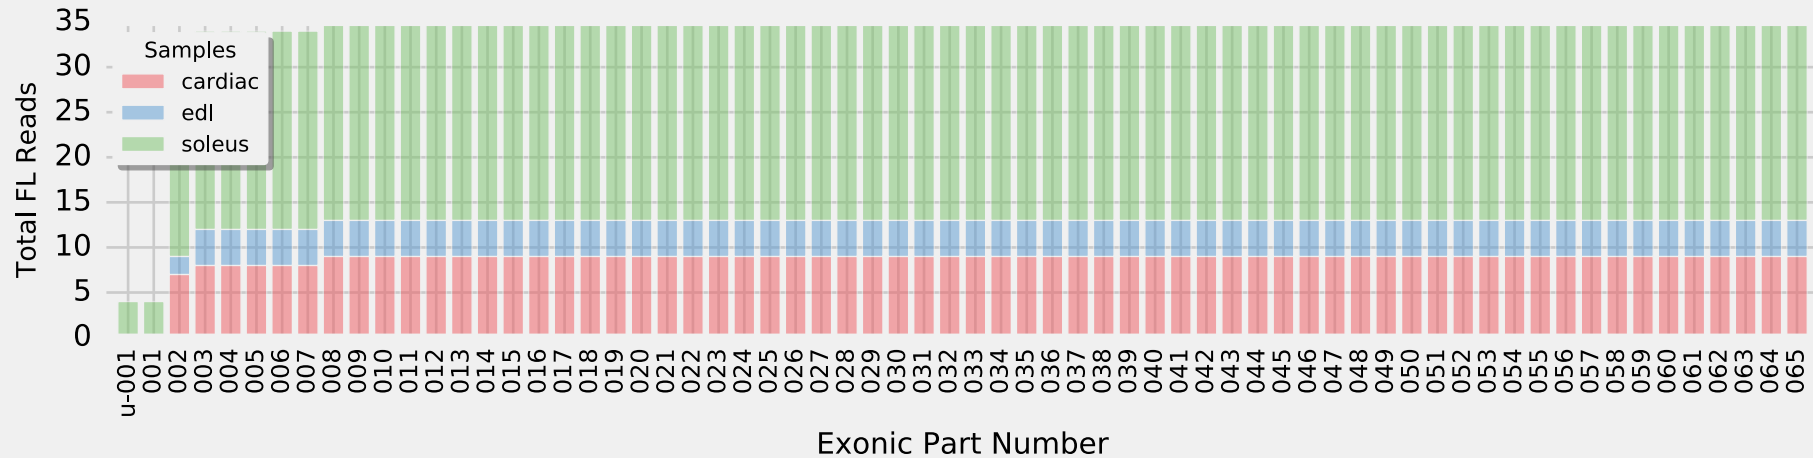

# Plec

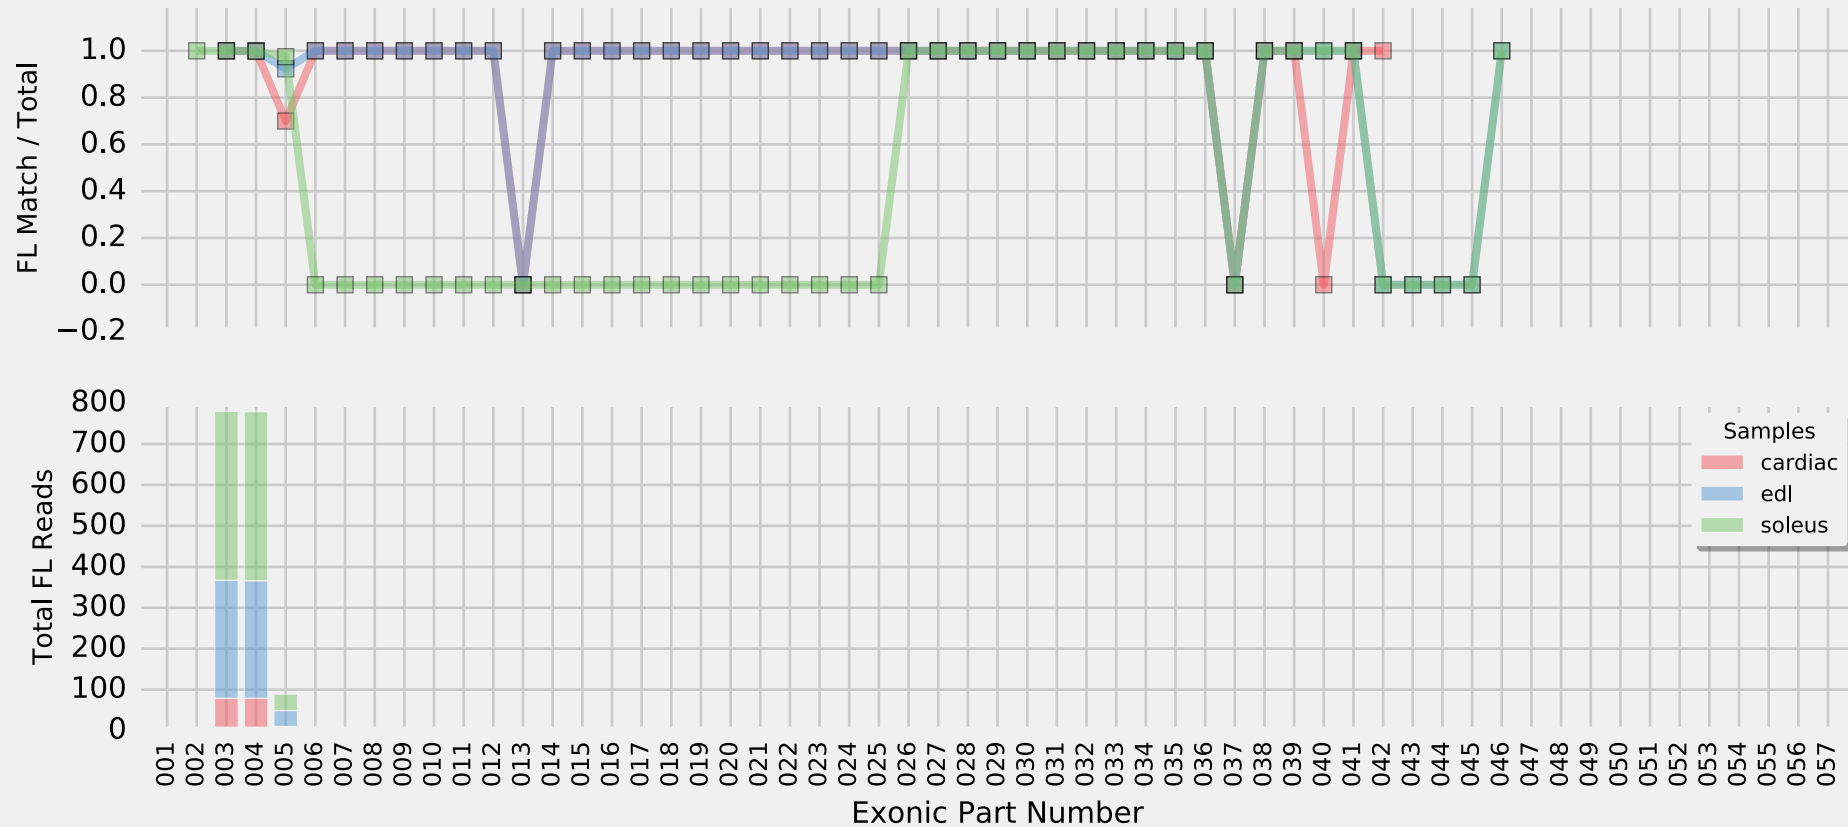

# Plin4

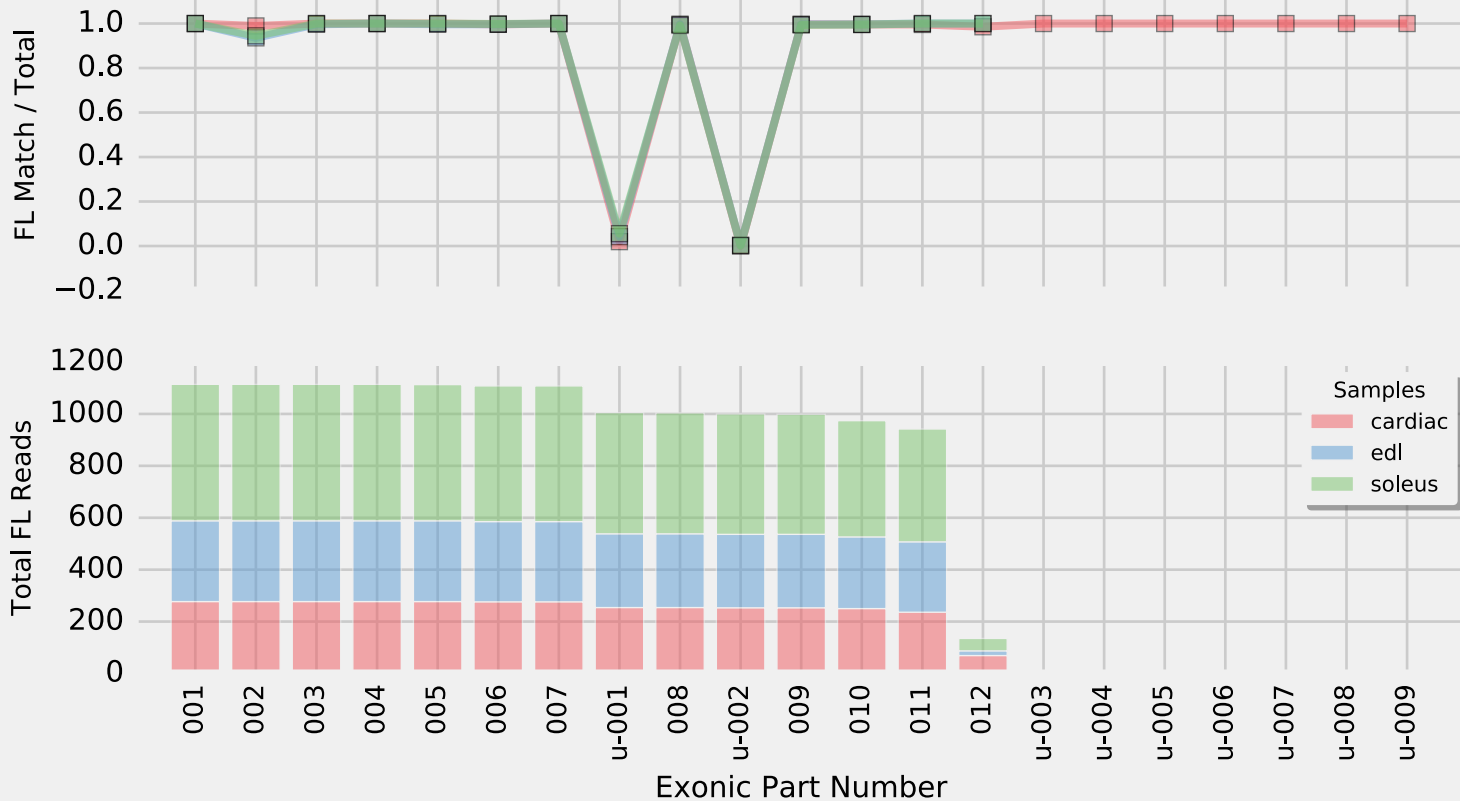

# Plxna2

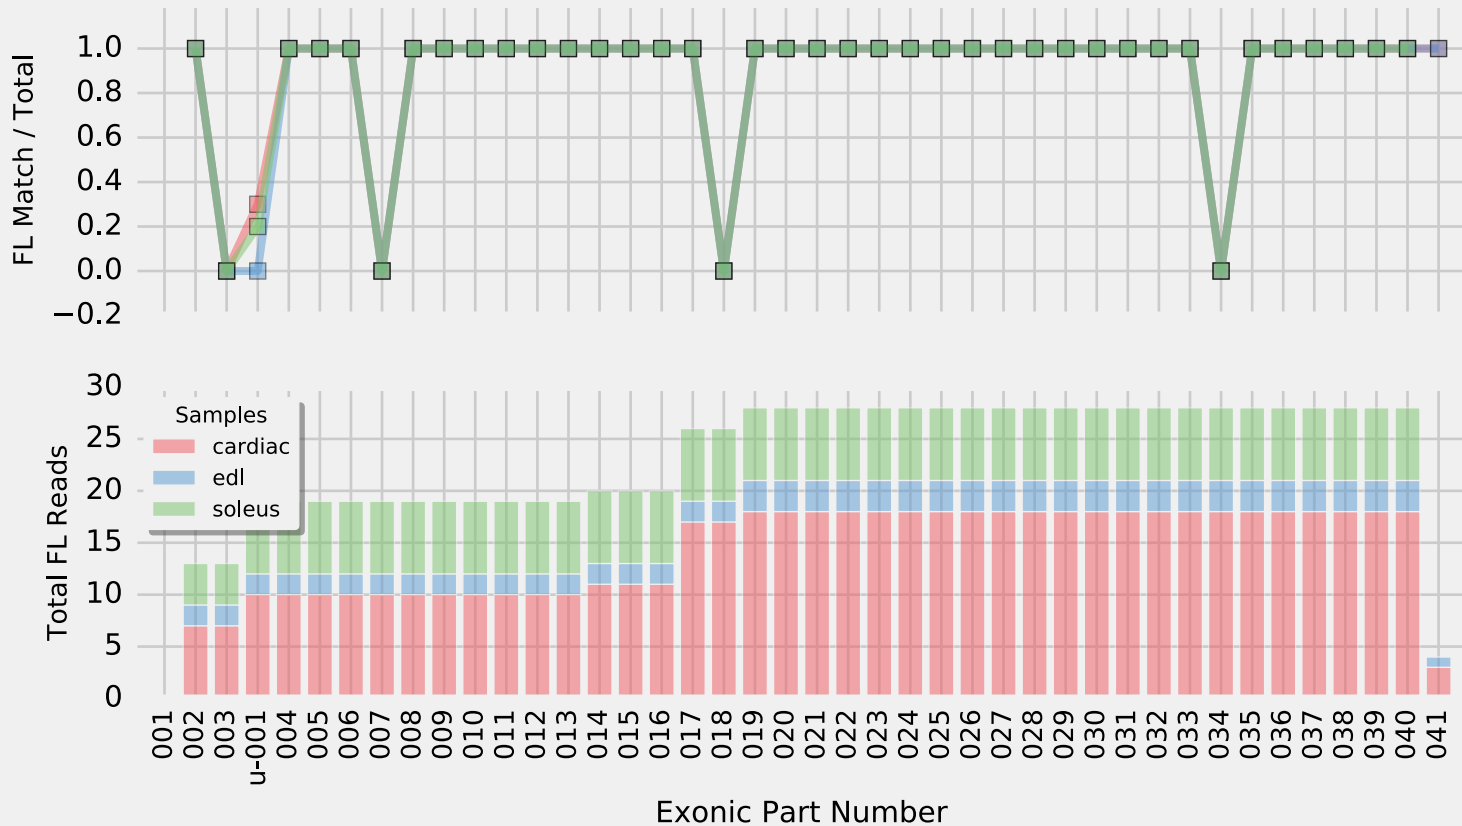

# Plxnb2

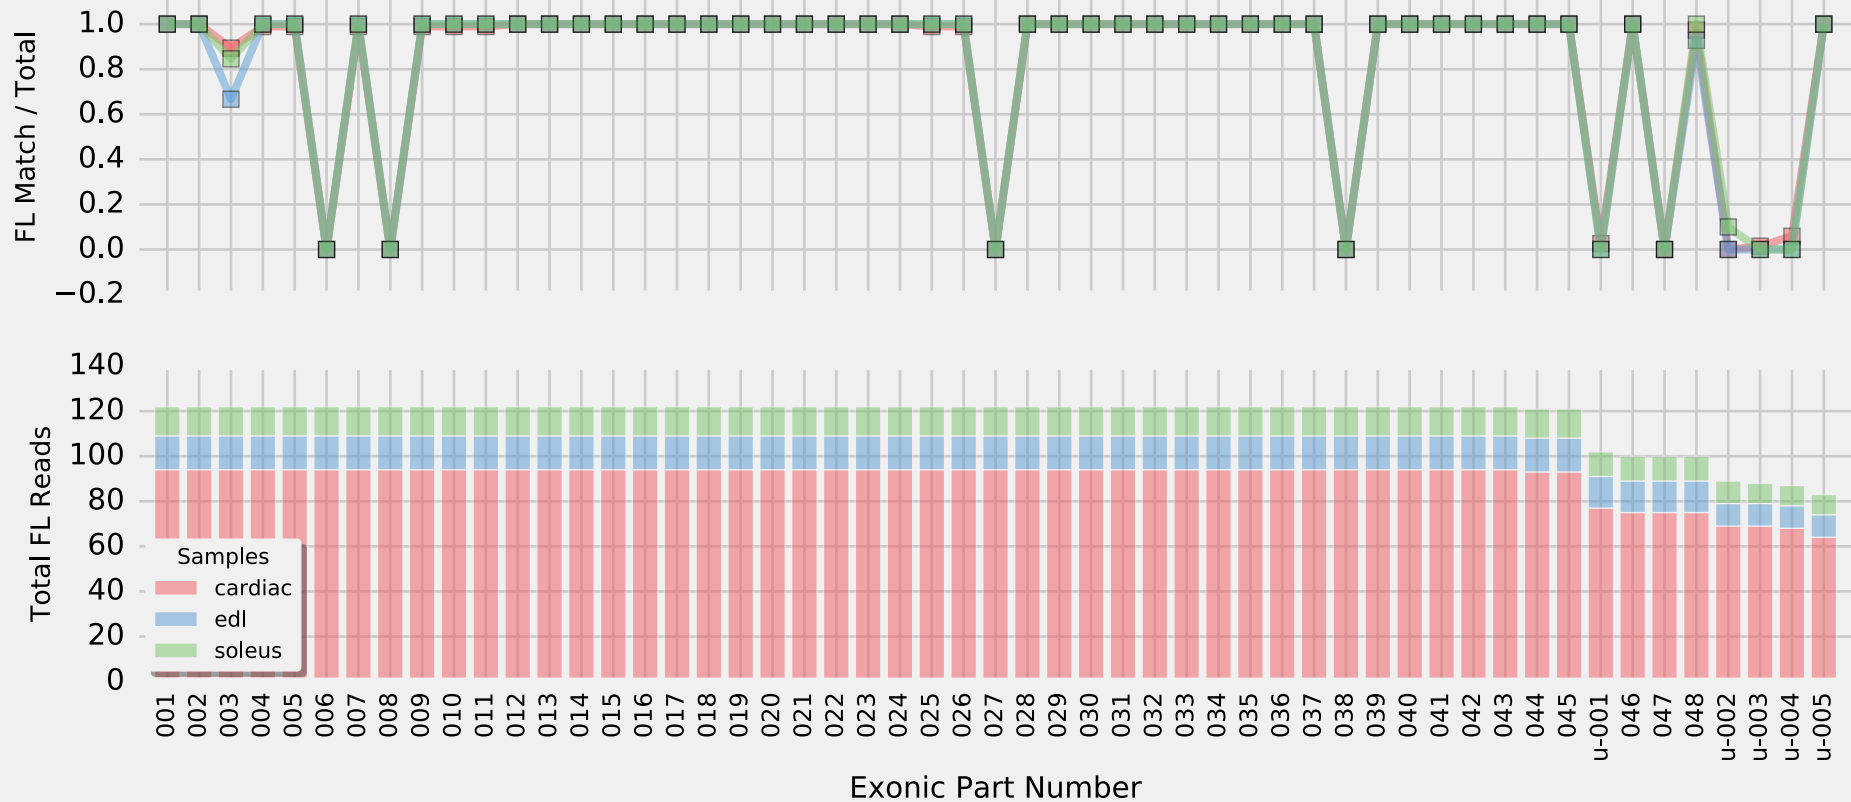

# Pm20d2

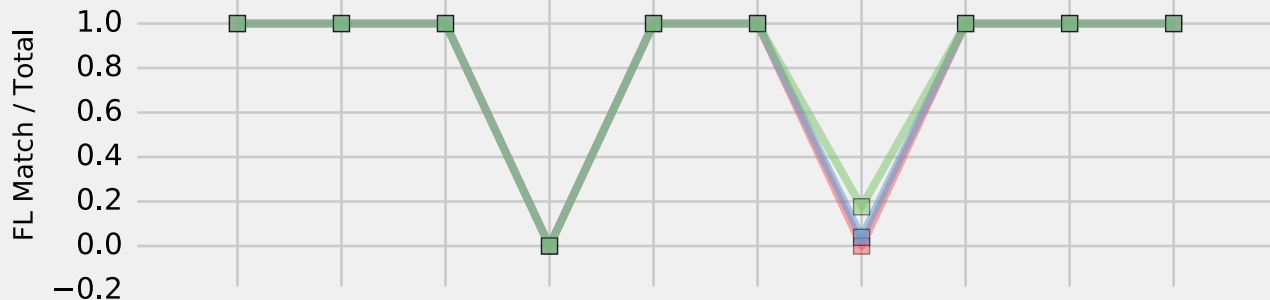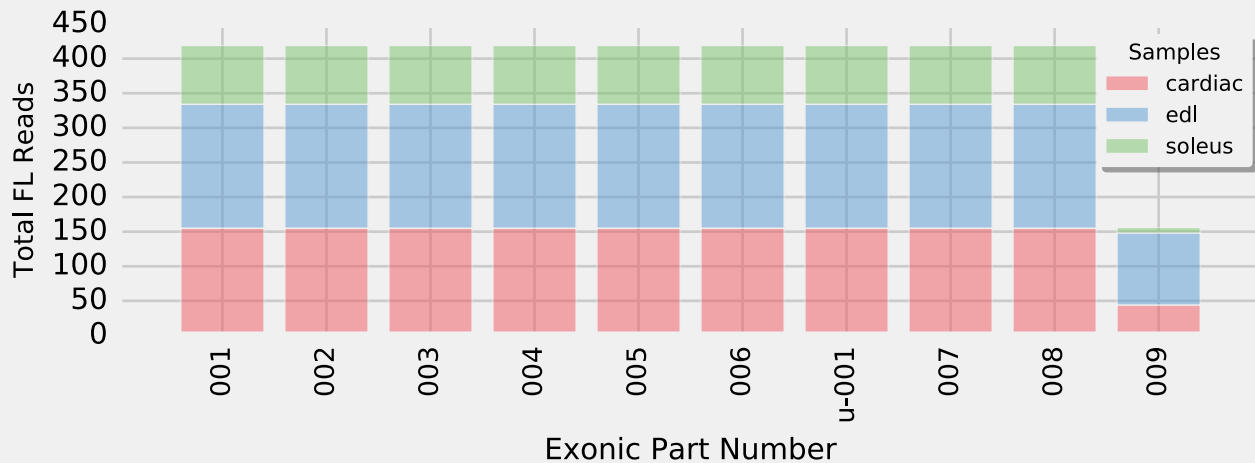



# Podxl

FL Match / Total

1.0  
0.8  
0.6  
0.4  
0.2  
0.0  
-0.2

Total FL Reads

200  
150  
100  
50  
0

Samples

cardiac

edl

soleus

Exonic Part Number

001

002

003

004

005

006

007

008

009

010

011

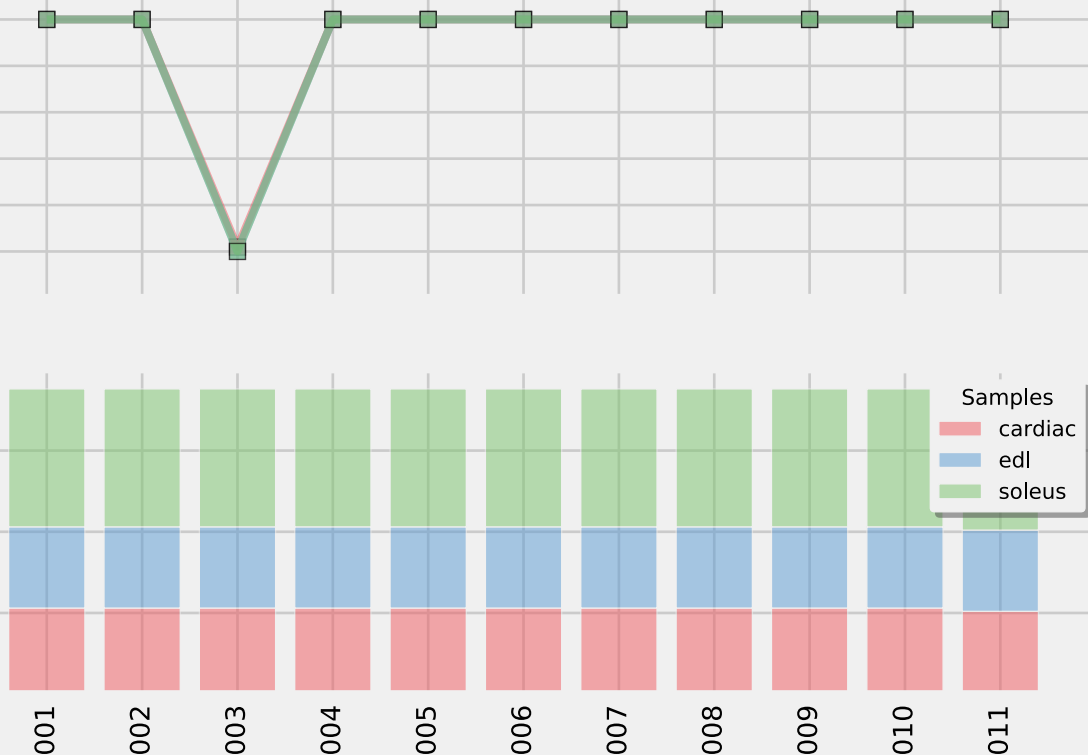

# Pogk

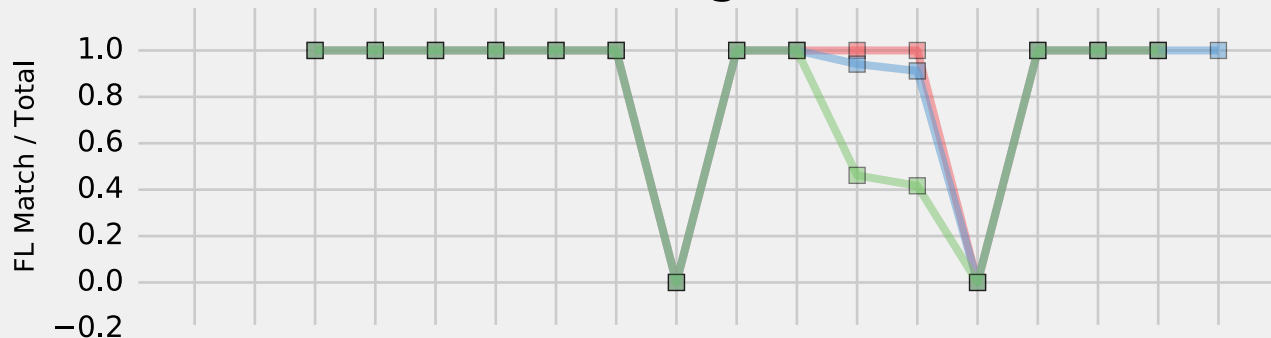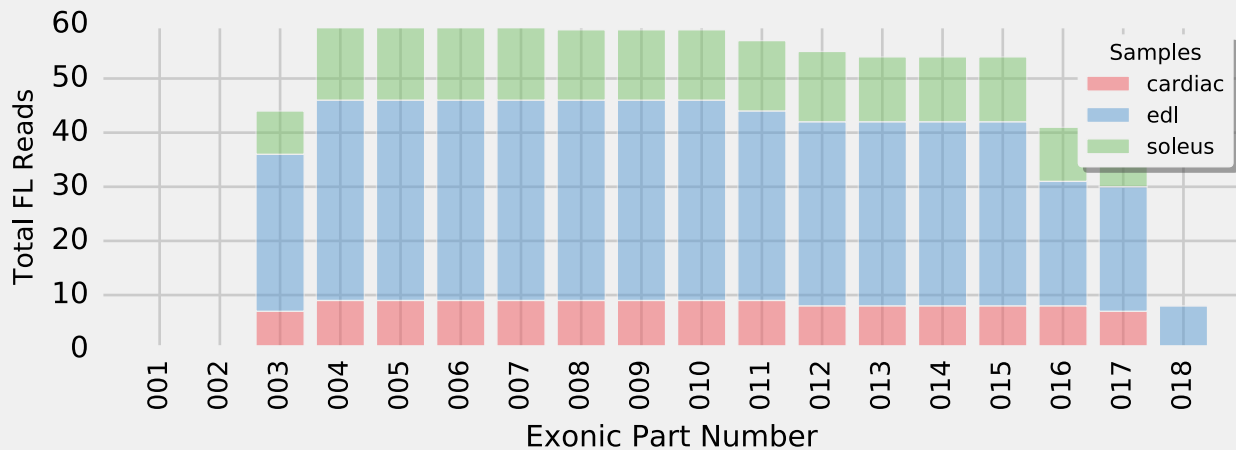

# Polr1a

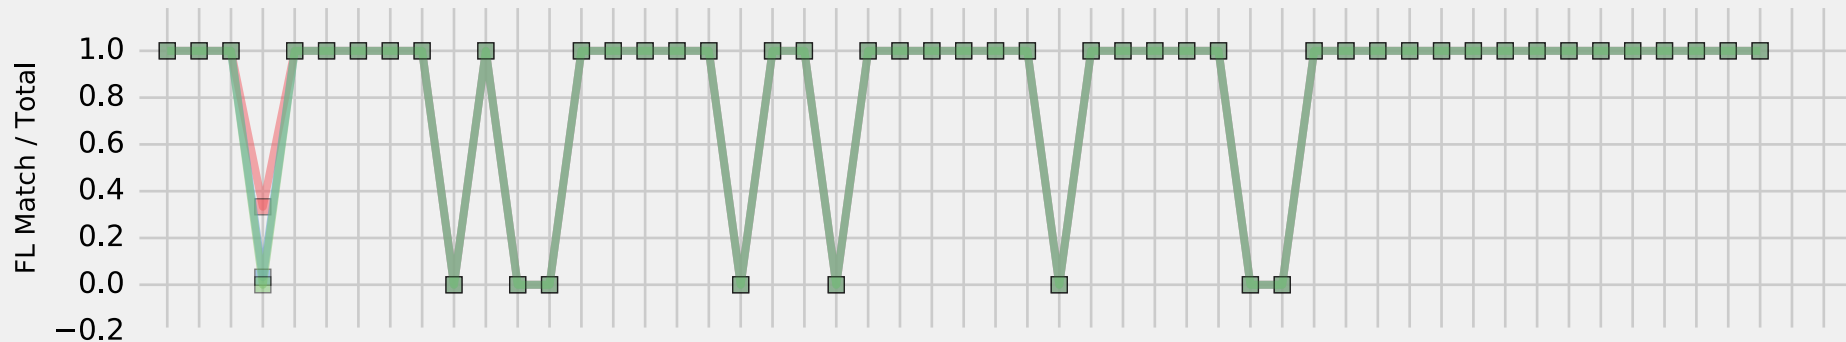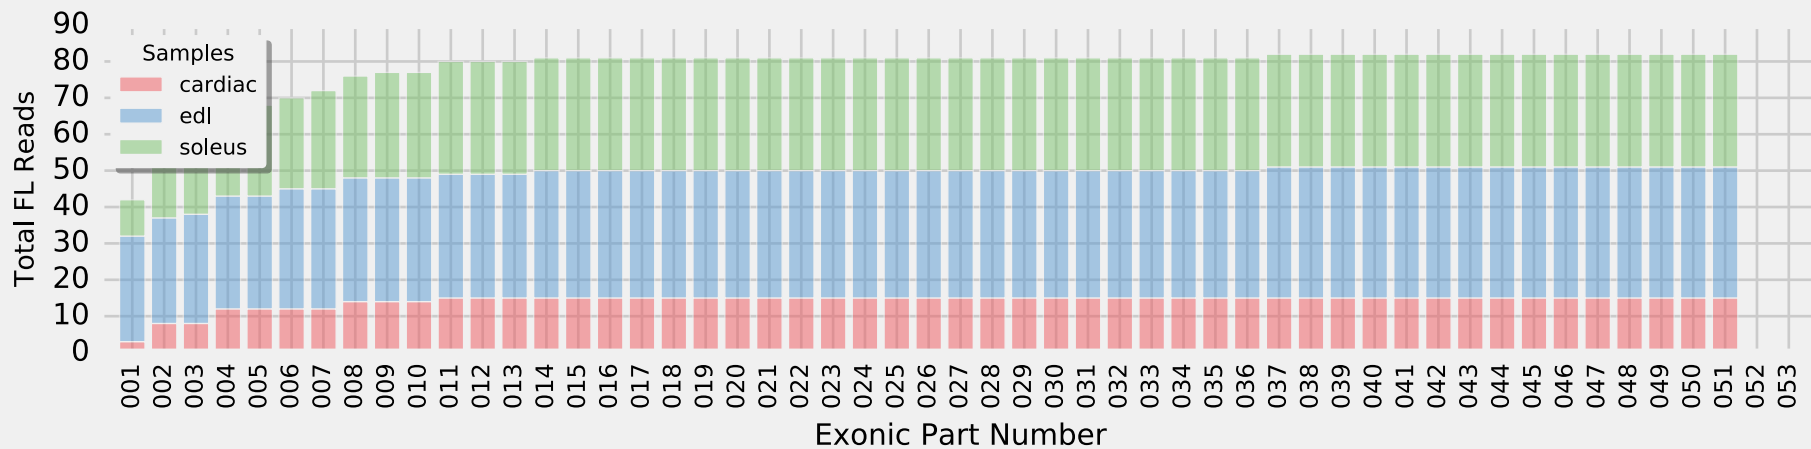

# Ppip5k1

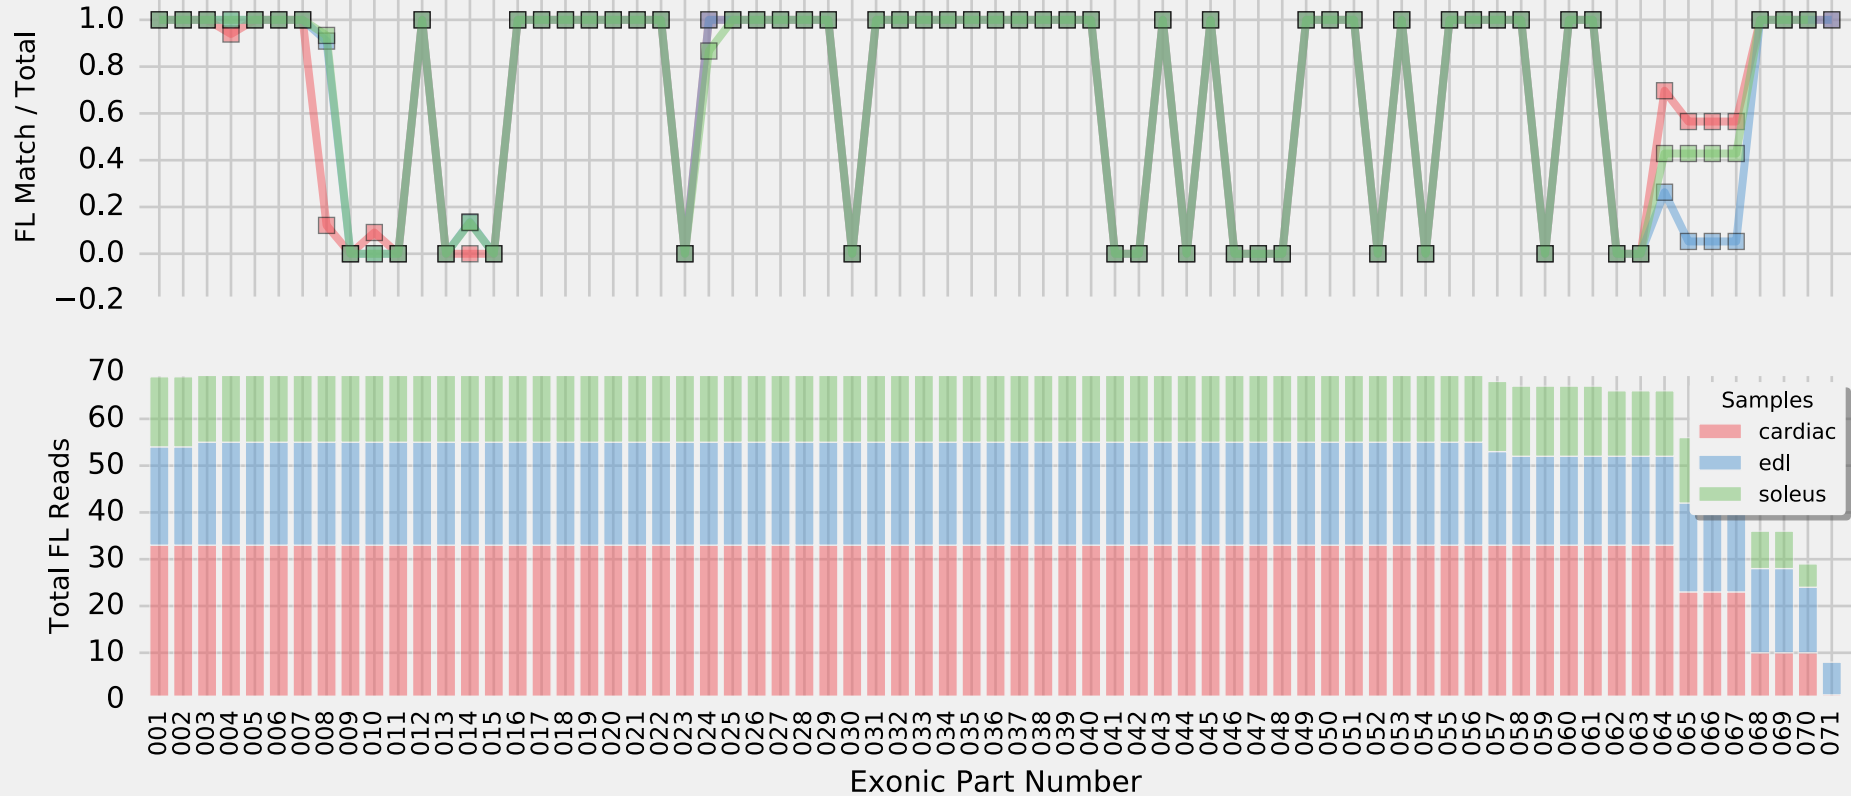

# Ppip5k2

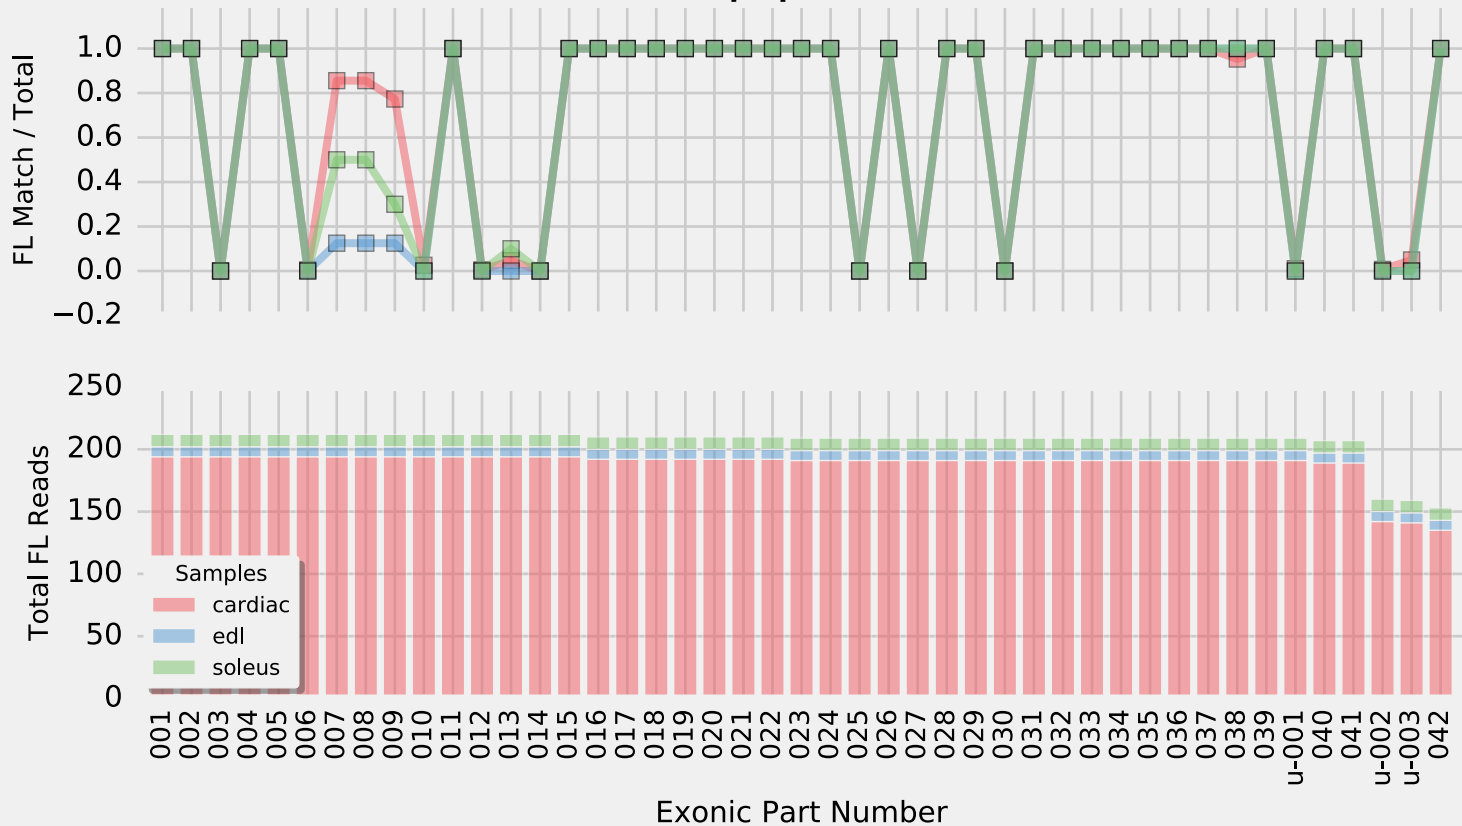

# Ppm1k

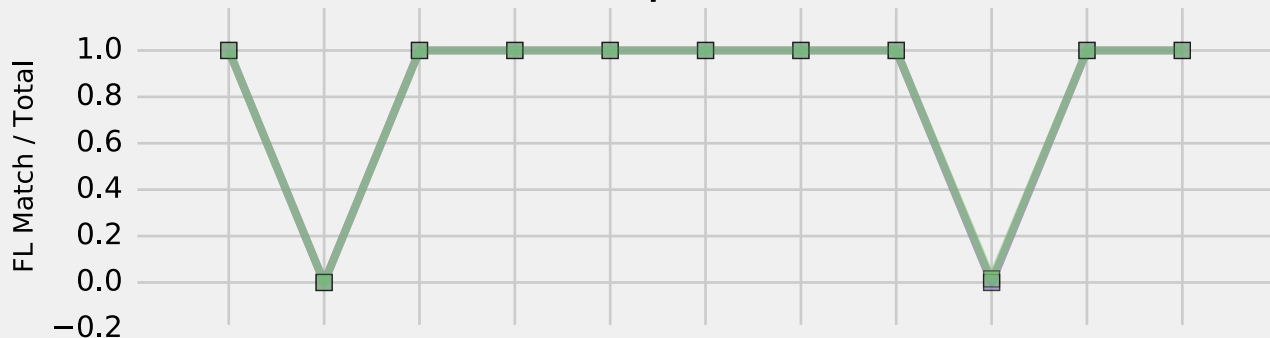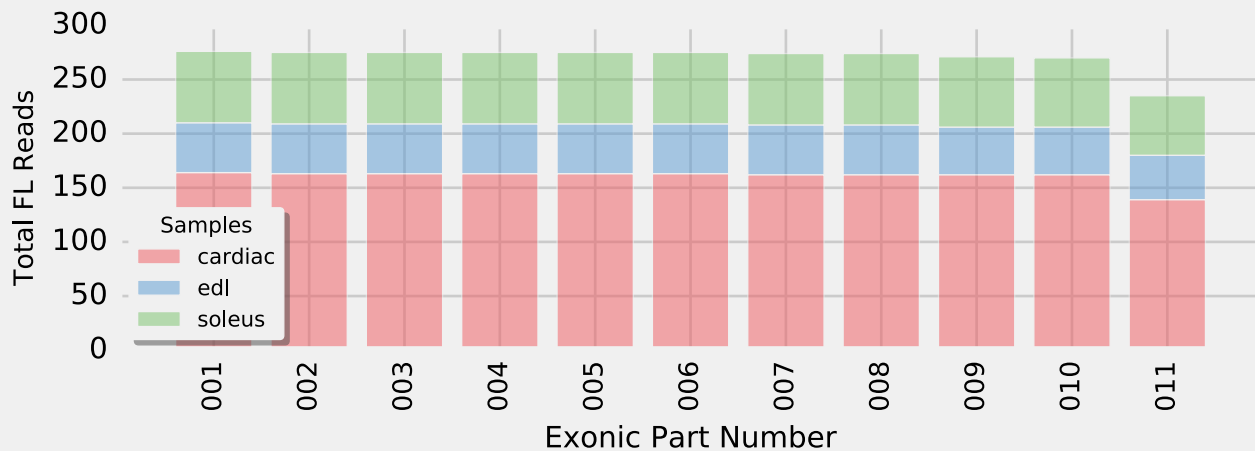

# Ppm1l

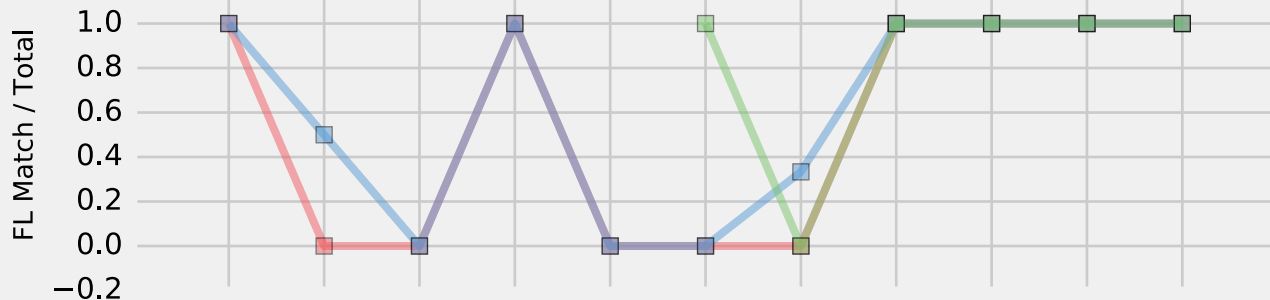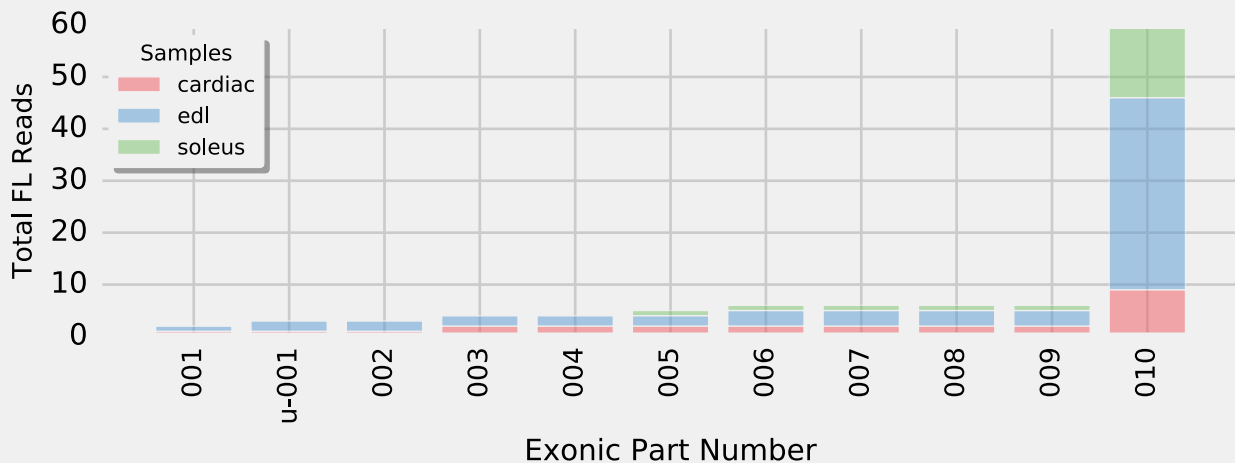

# Ppp1r12b

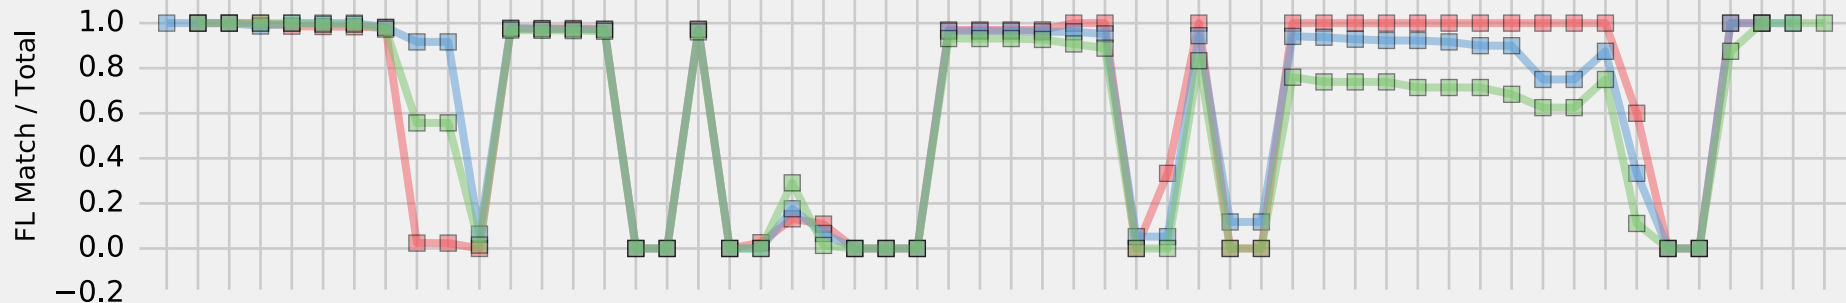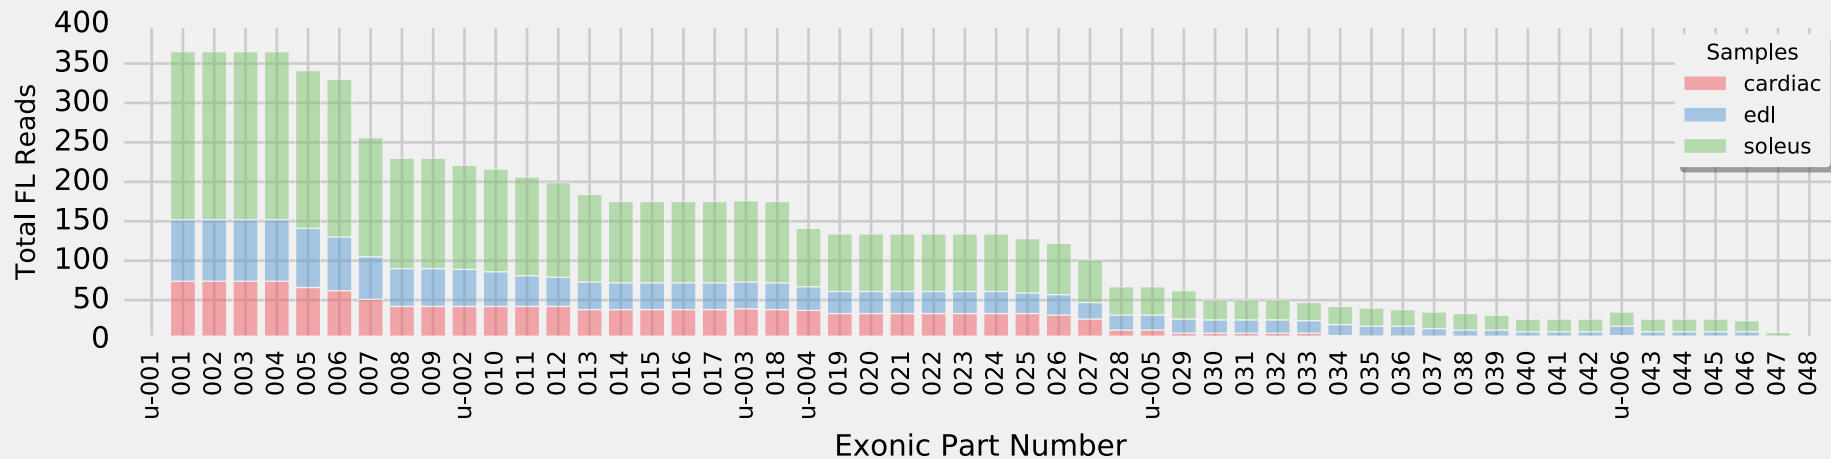



# Ppp1r15b

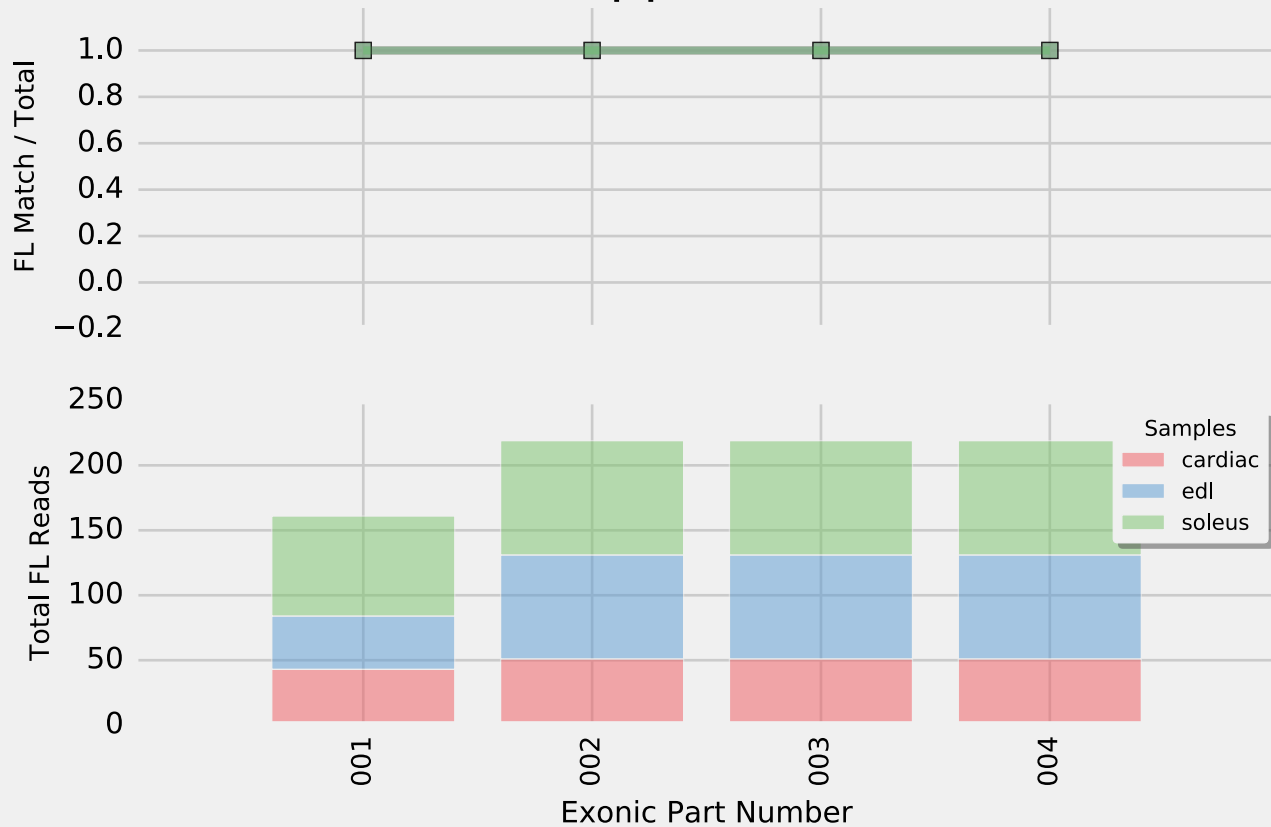

# Ppp1r3a

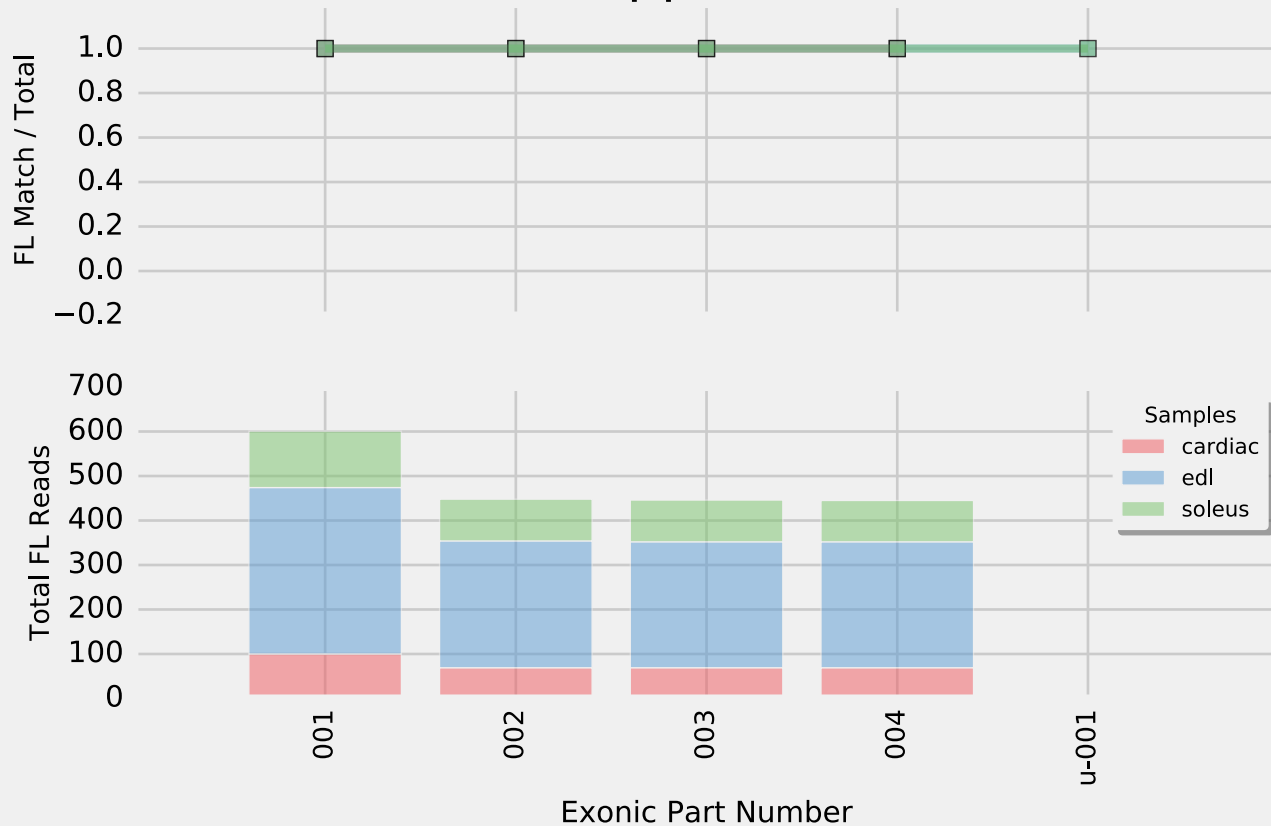

# Ppp2r3a

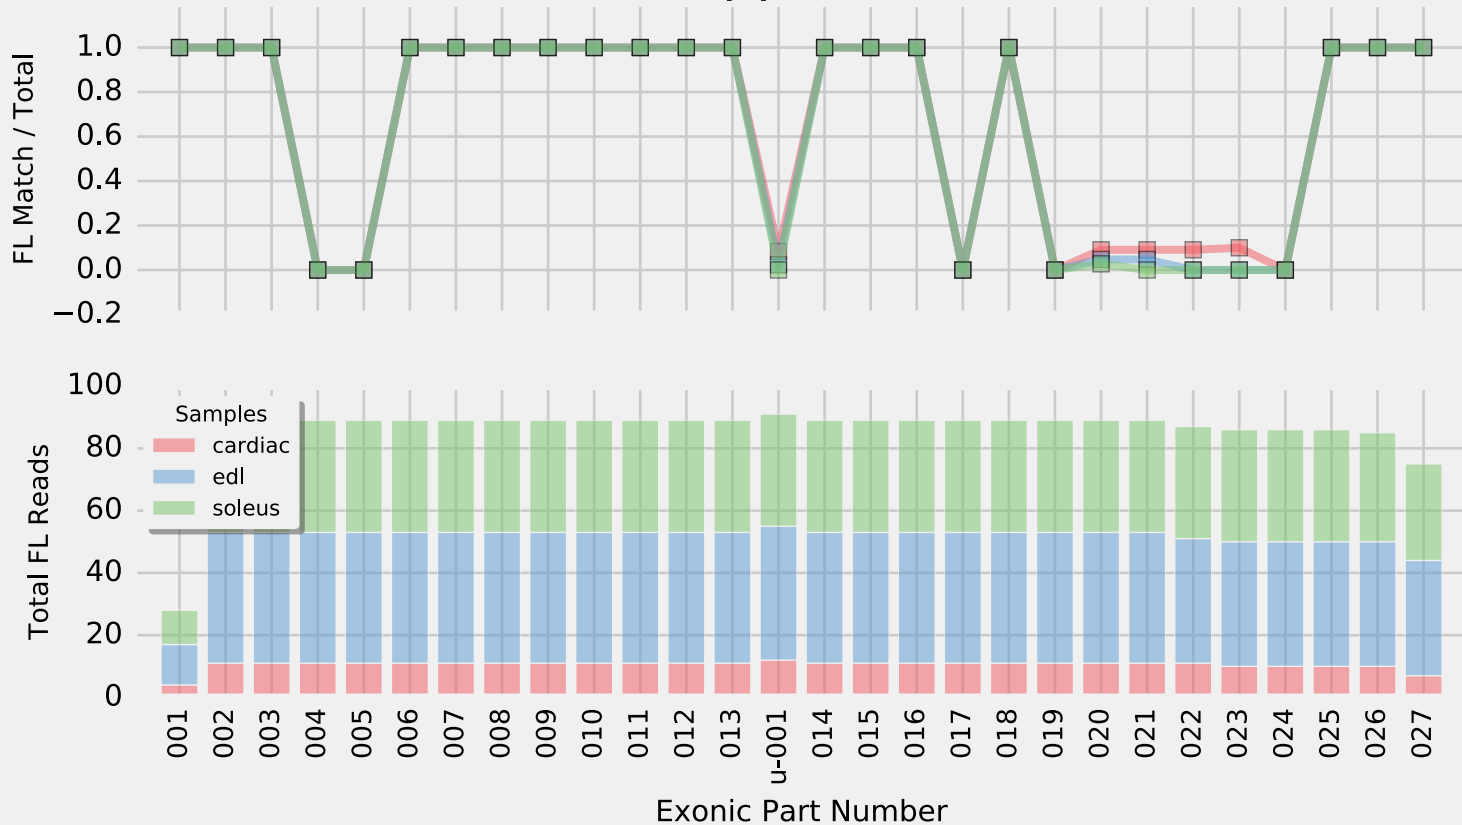

# Prkaa2

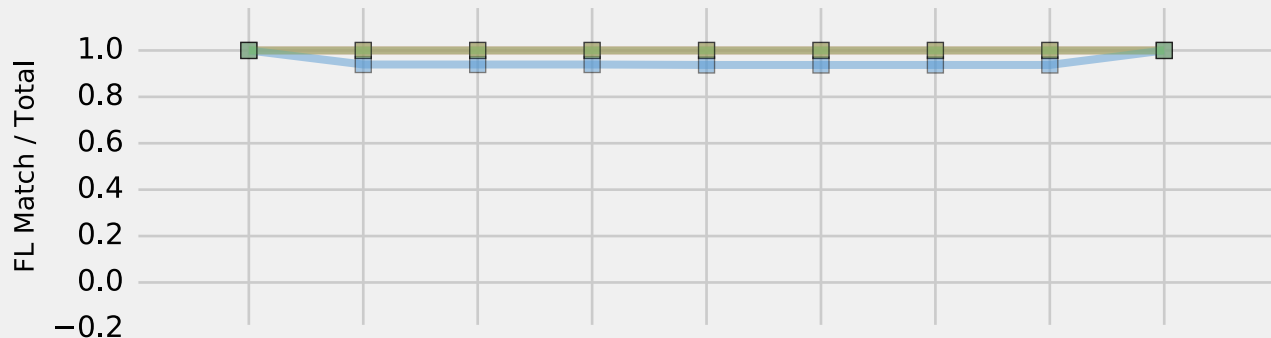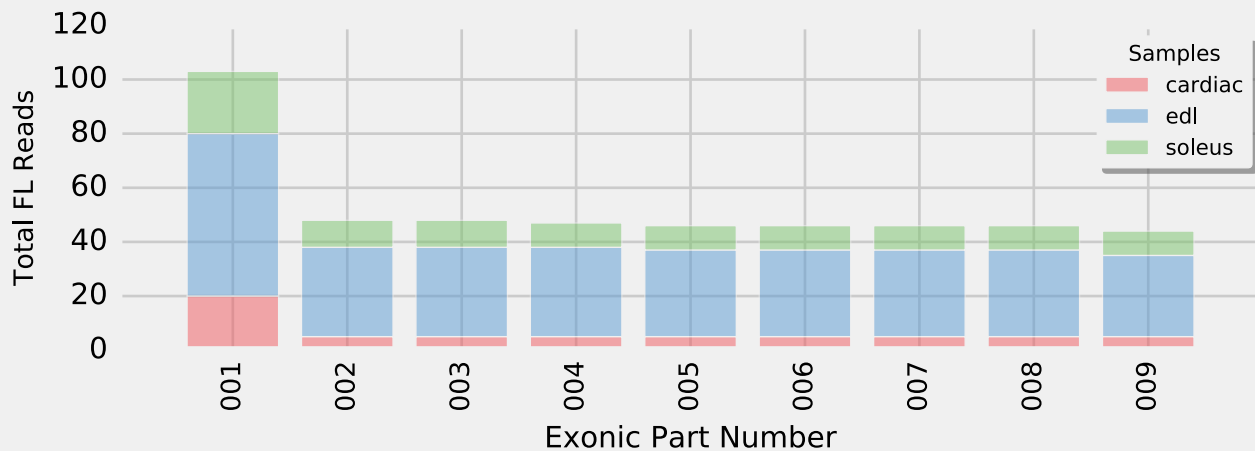

# Prkd3

FL Match / Total

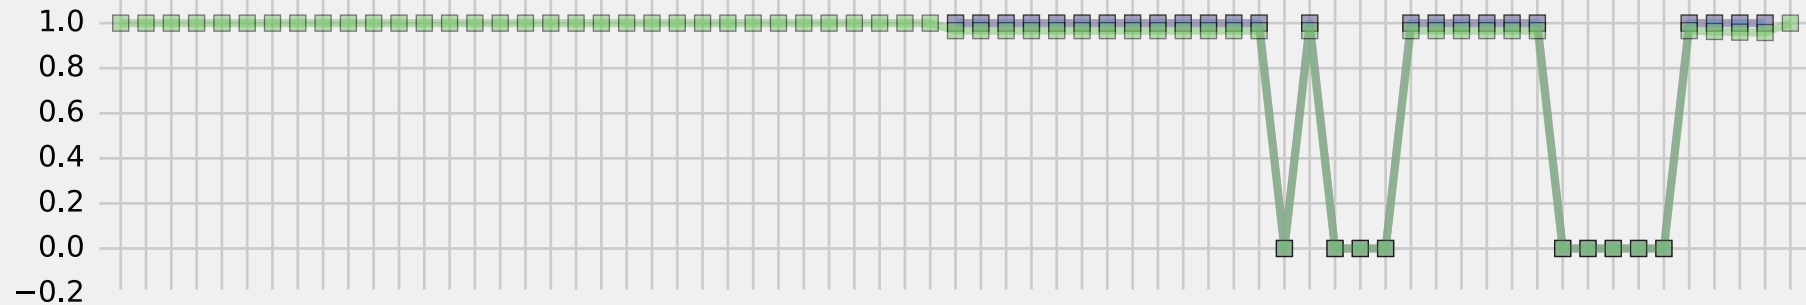

Total FL Reads

Samples  
cardiac  
edl  
soleus

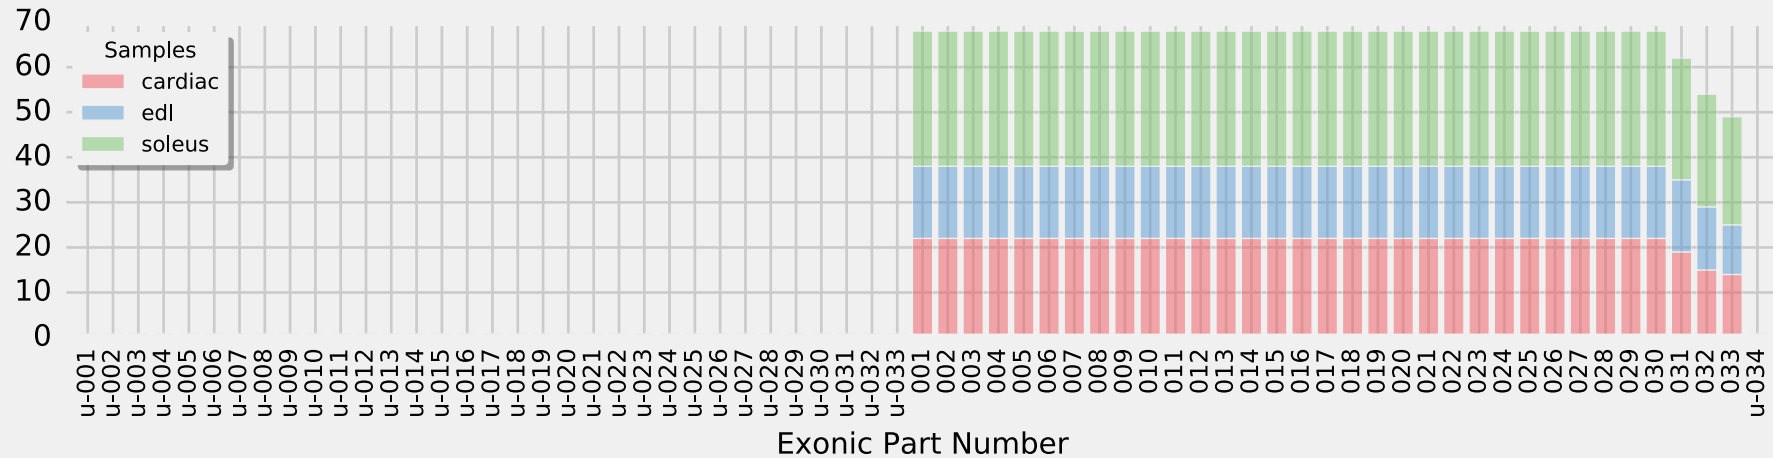

# Prkg1

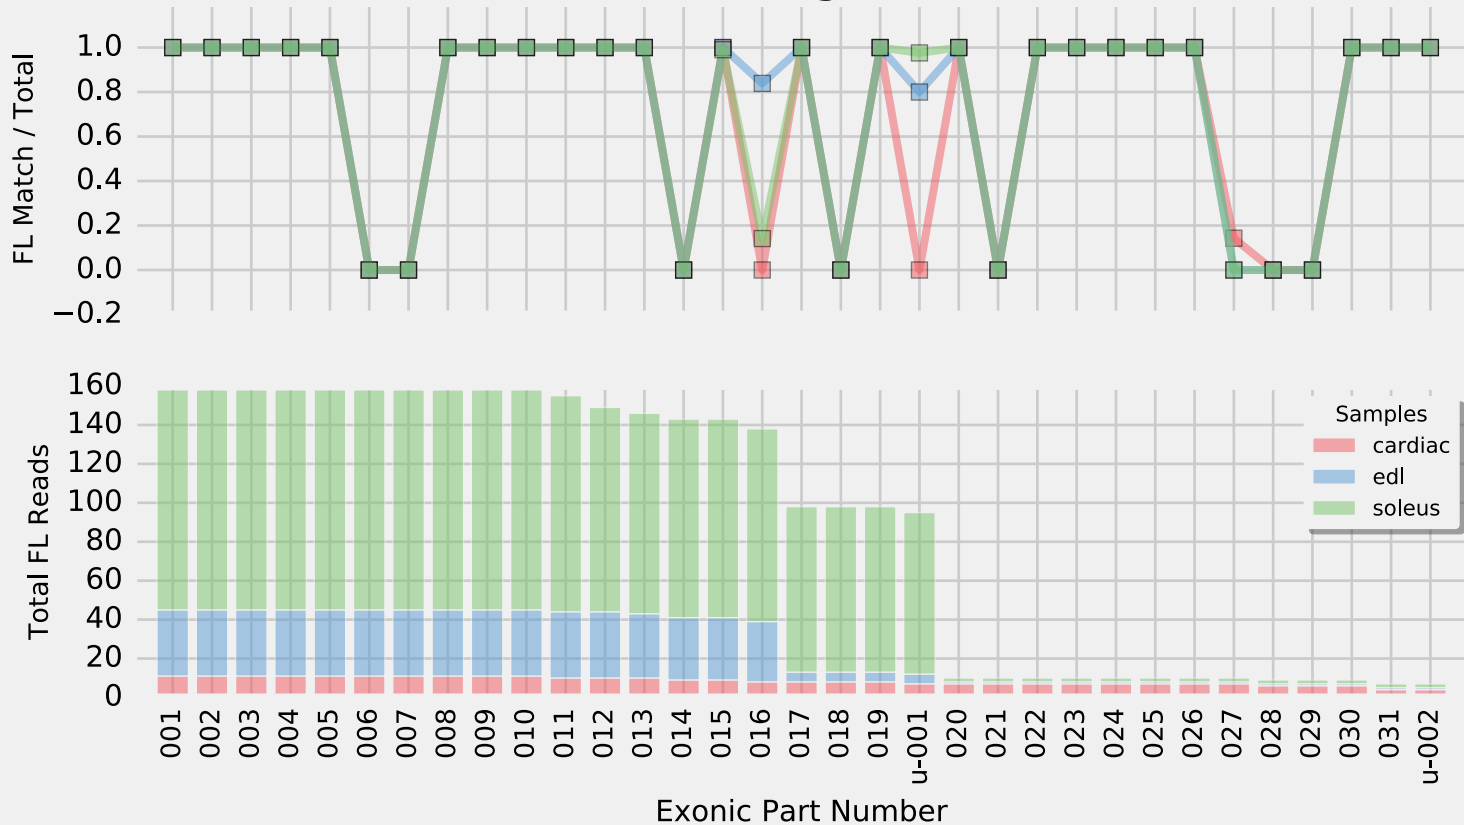

# Prox1

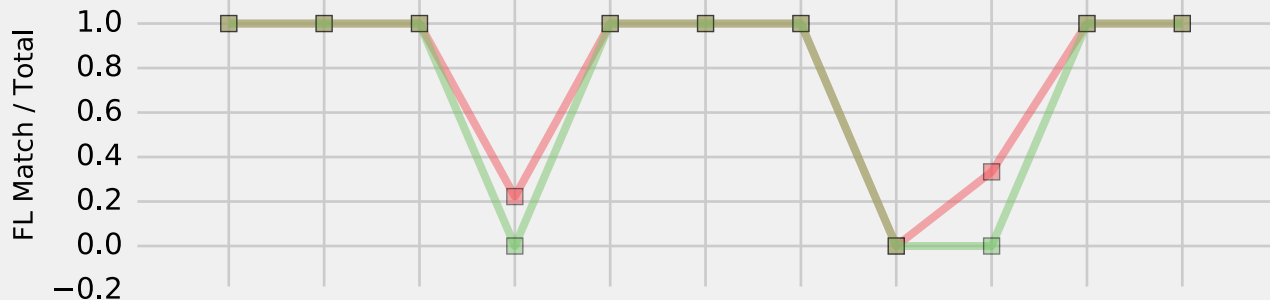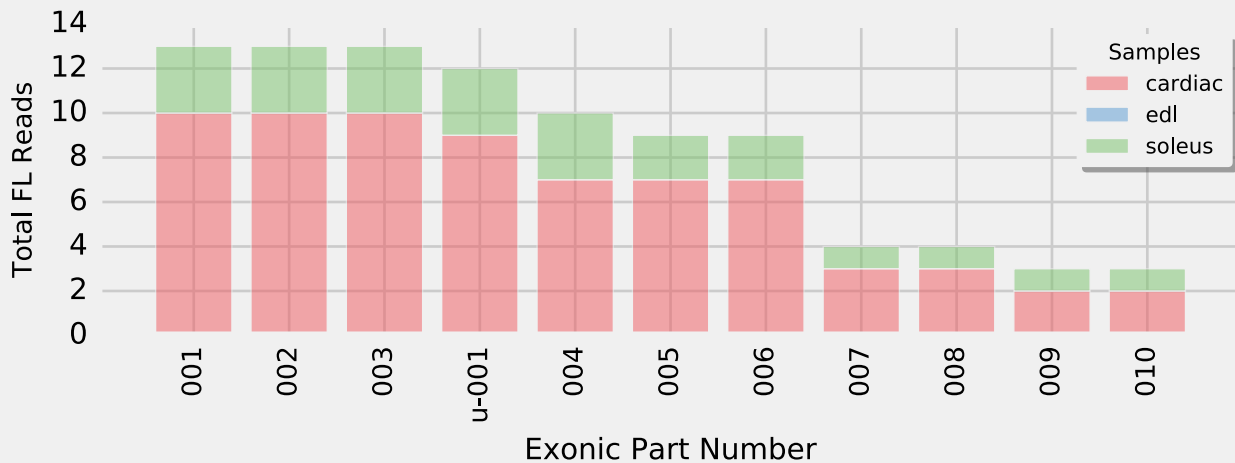

# Prpf8

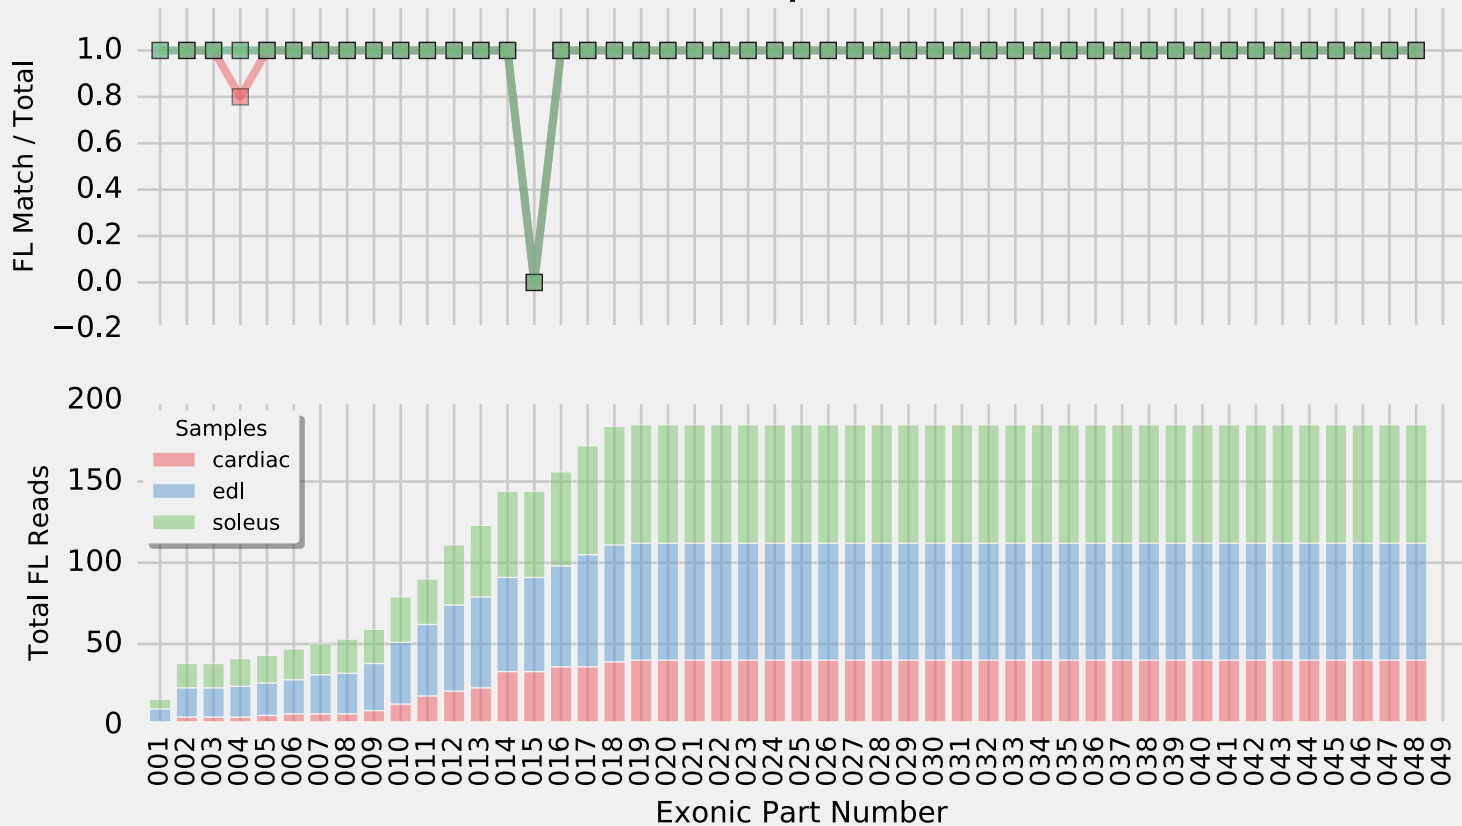



# Prirc2b

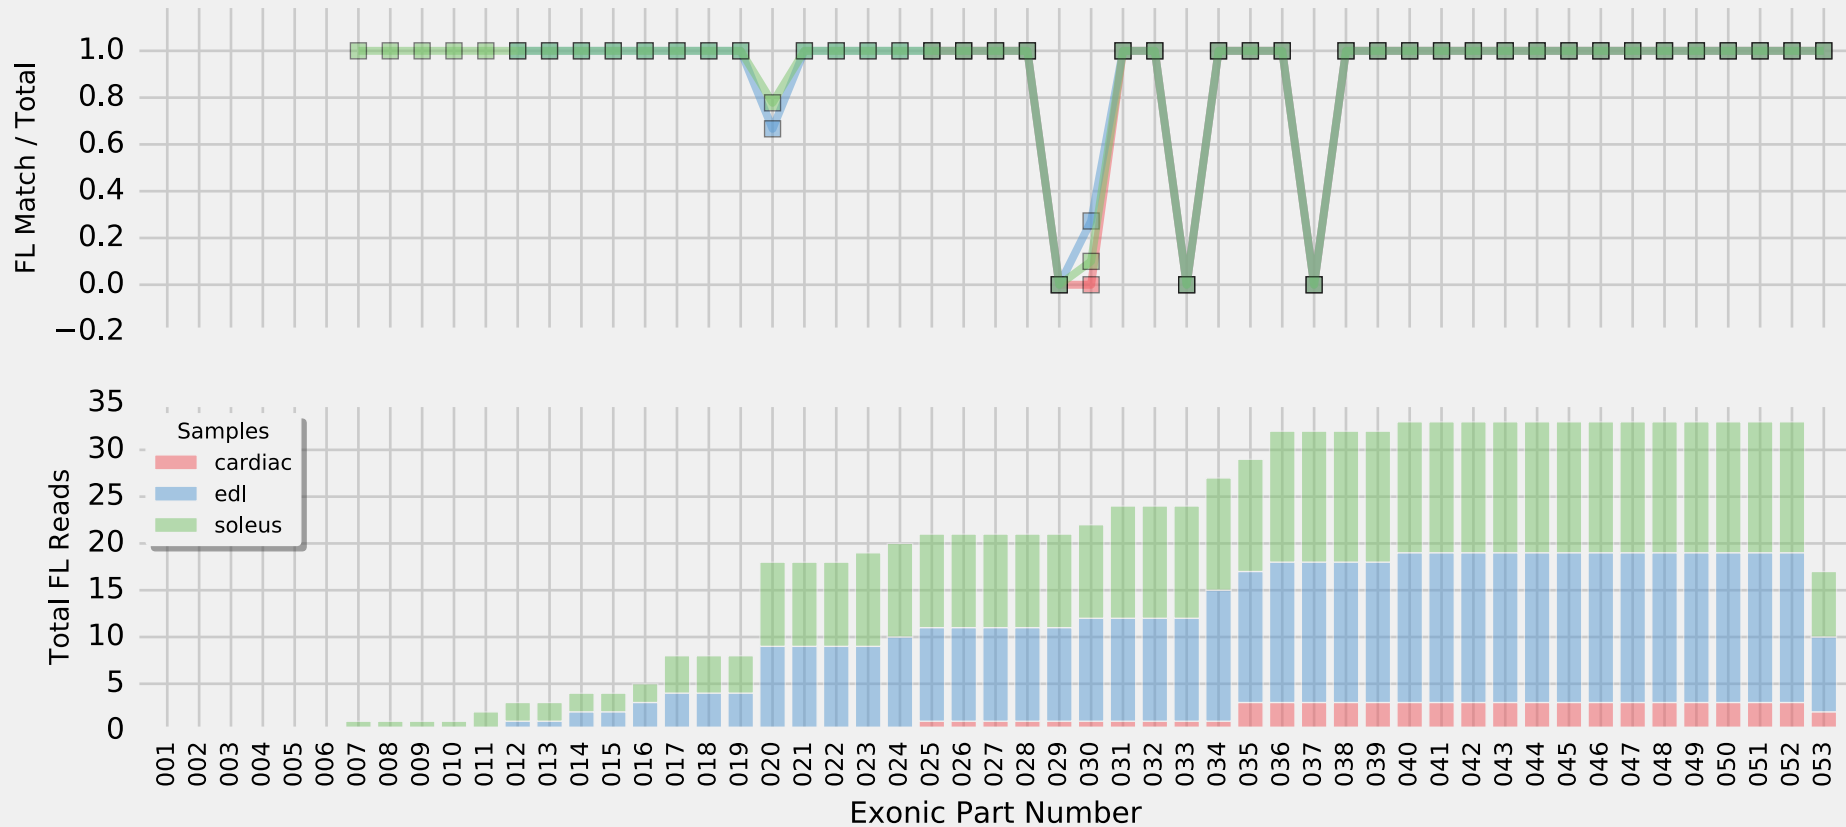

# Psme4

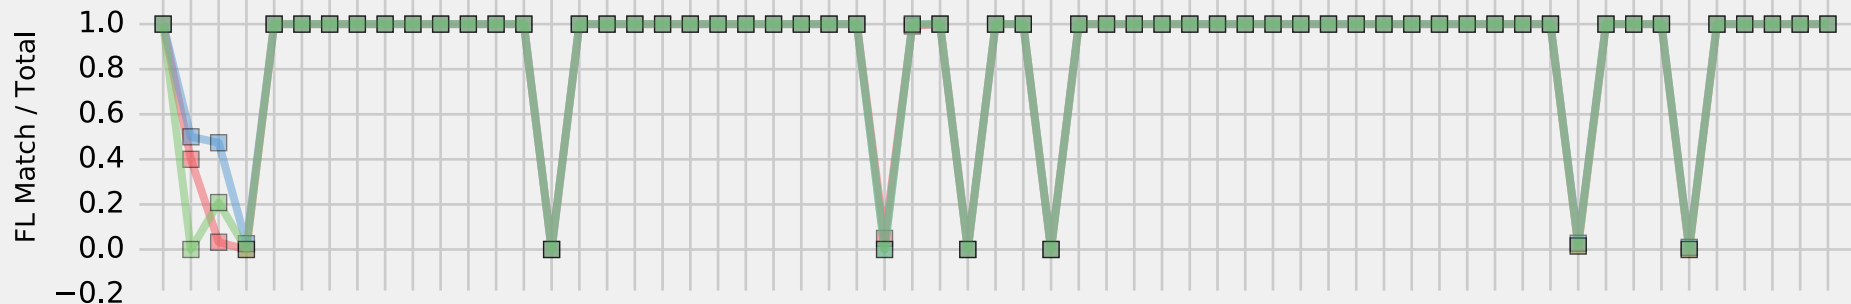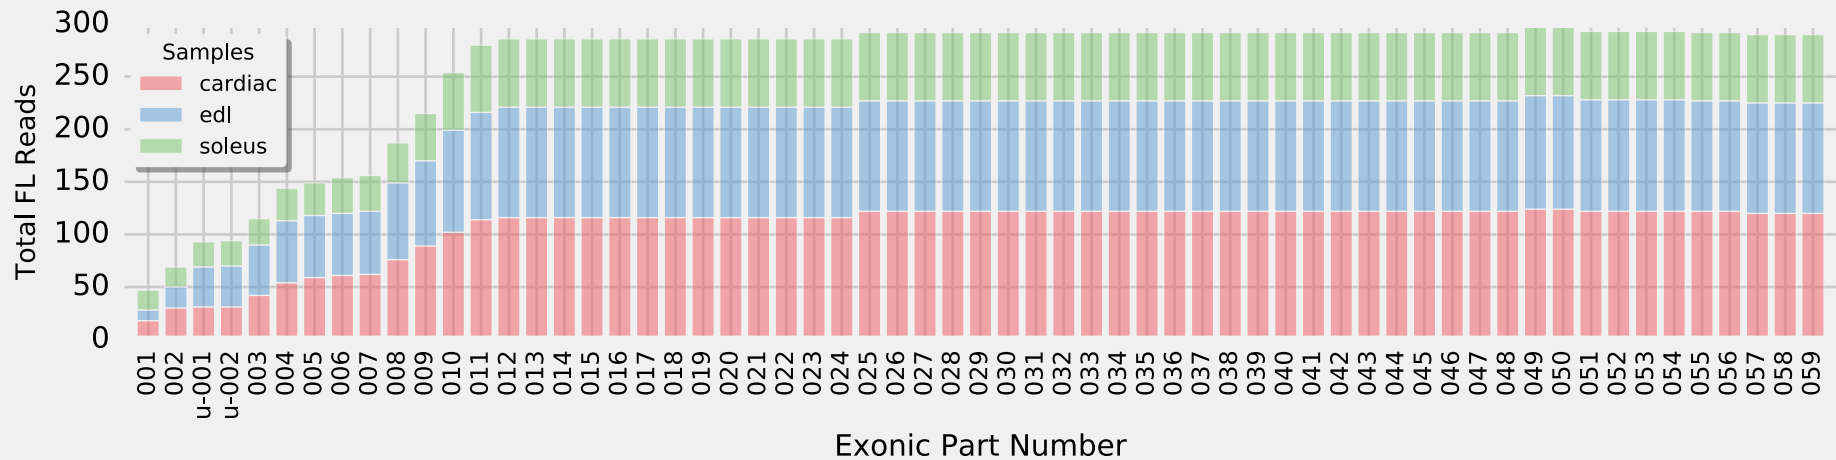

# Ptpn11

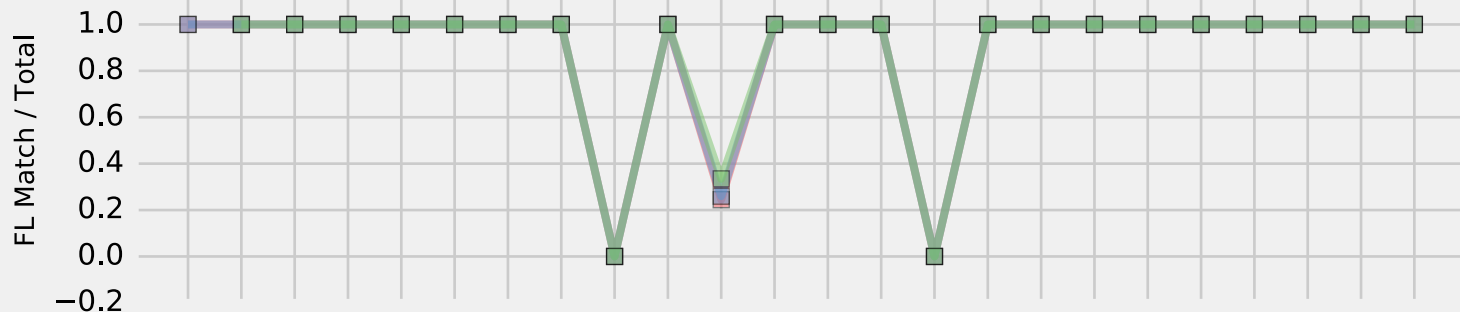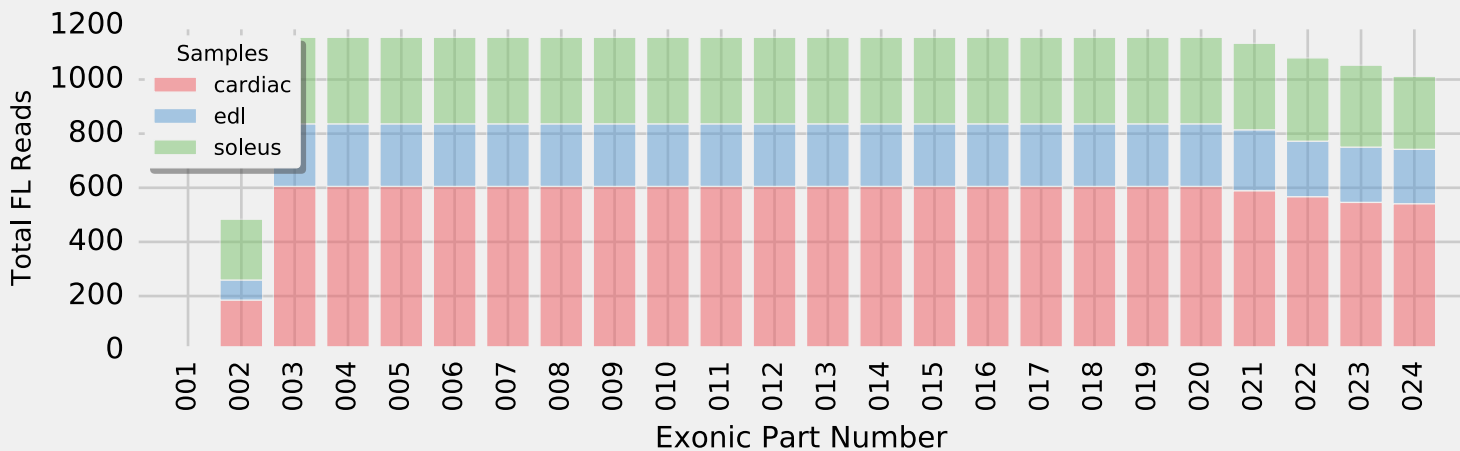

# Ptpn14

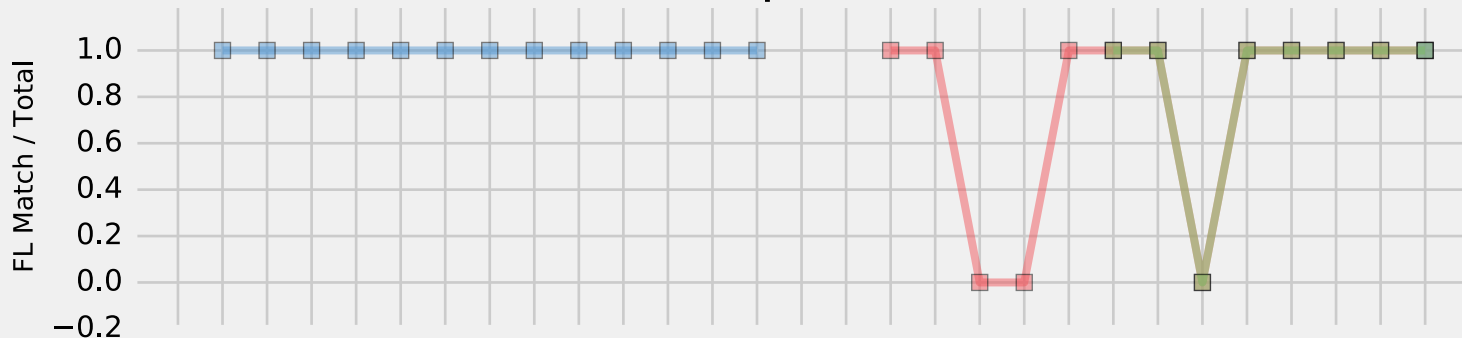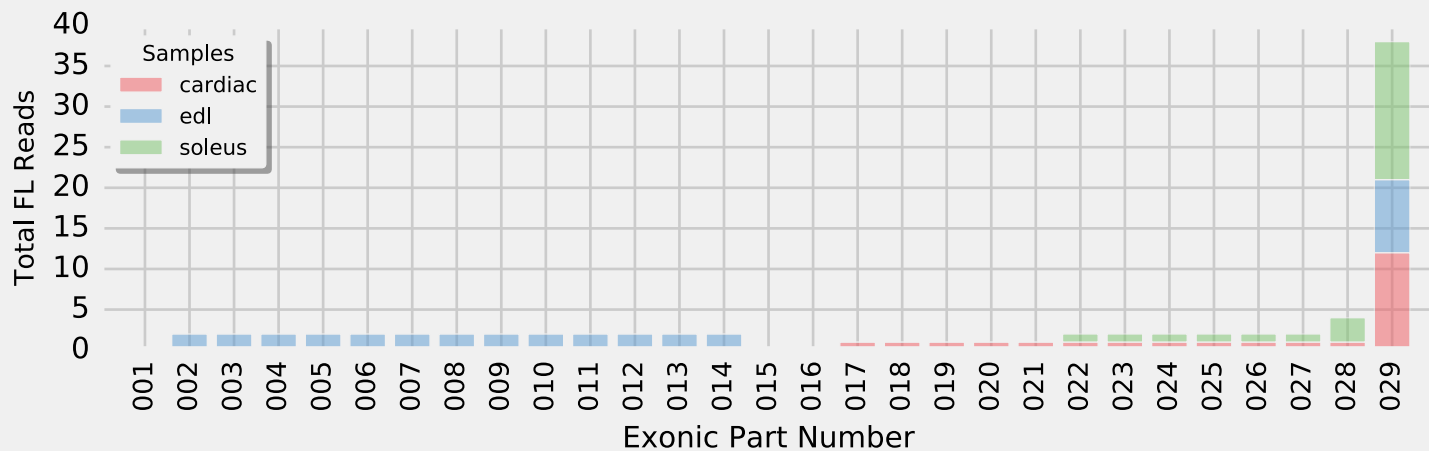

# Ptpn3

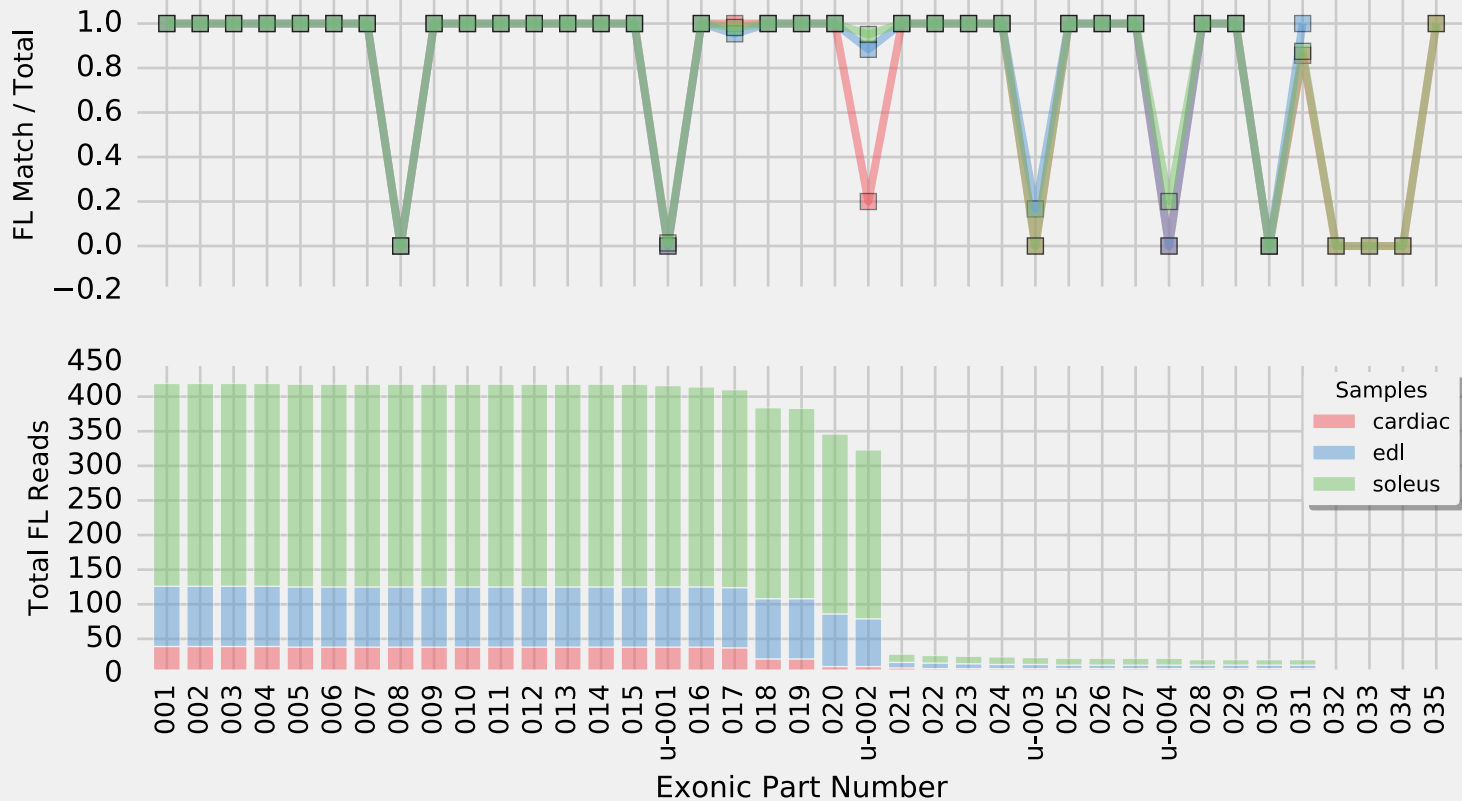

# Ptprb

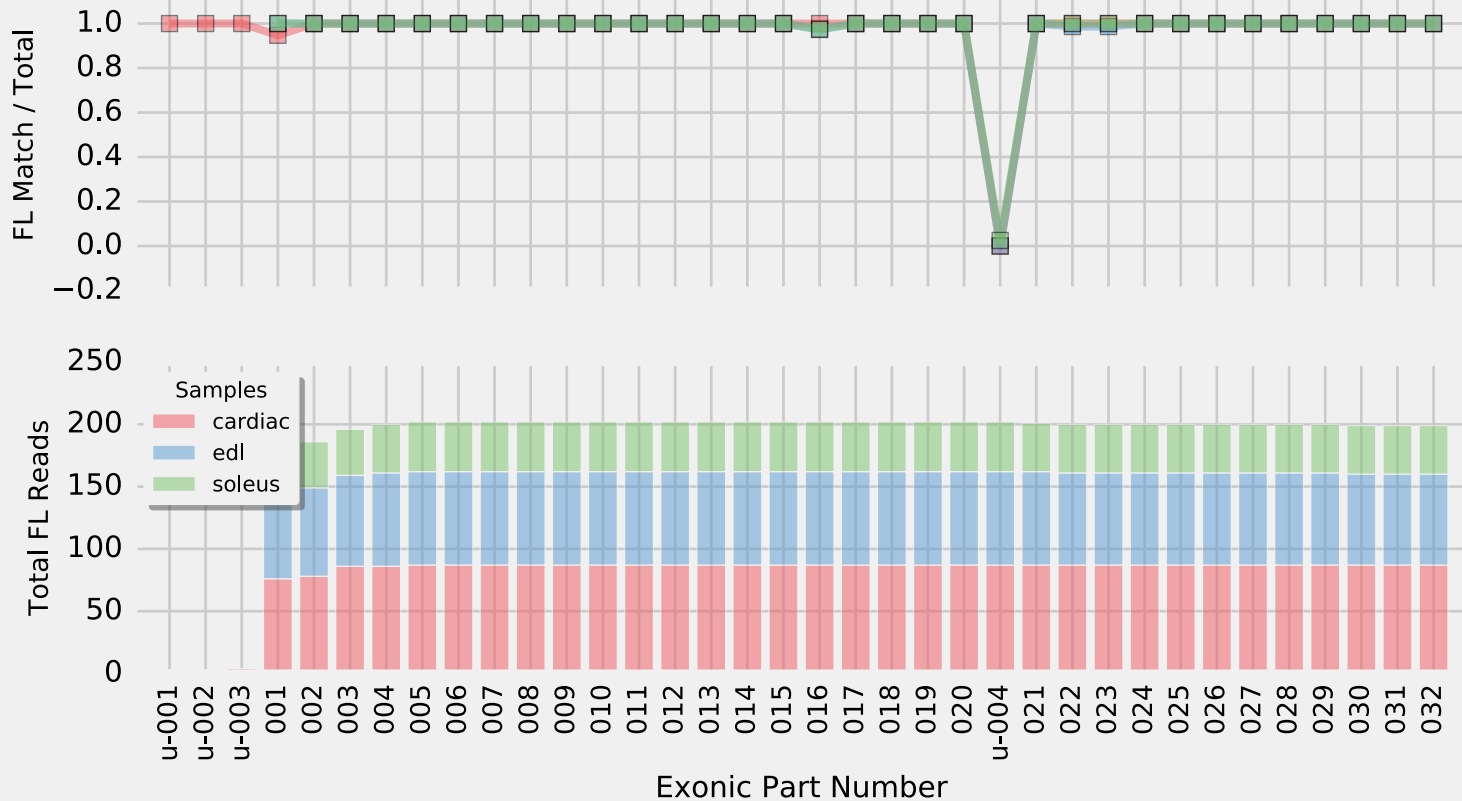

# Ptprg

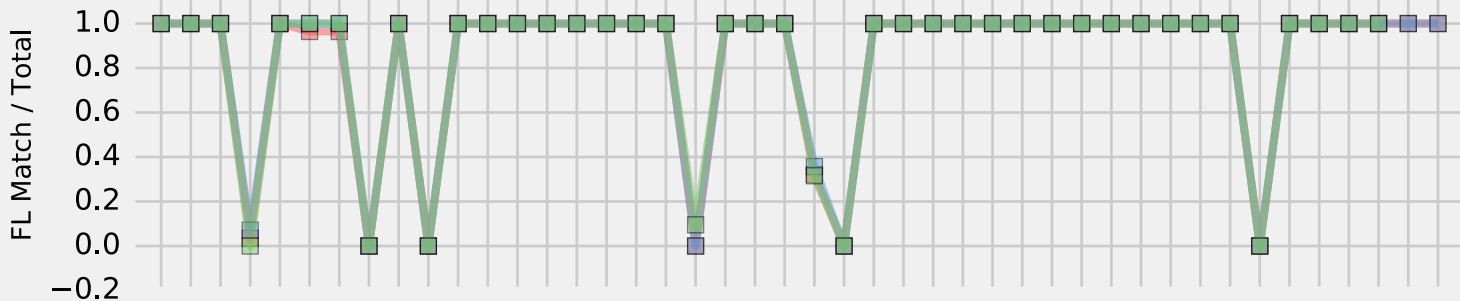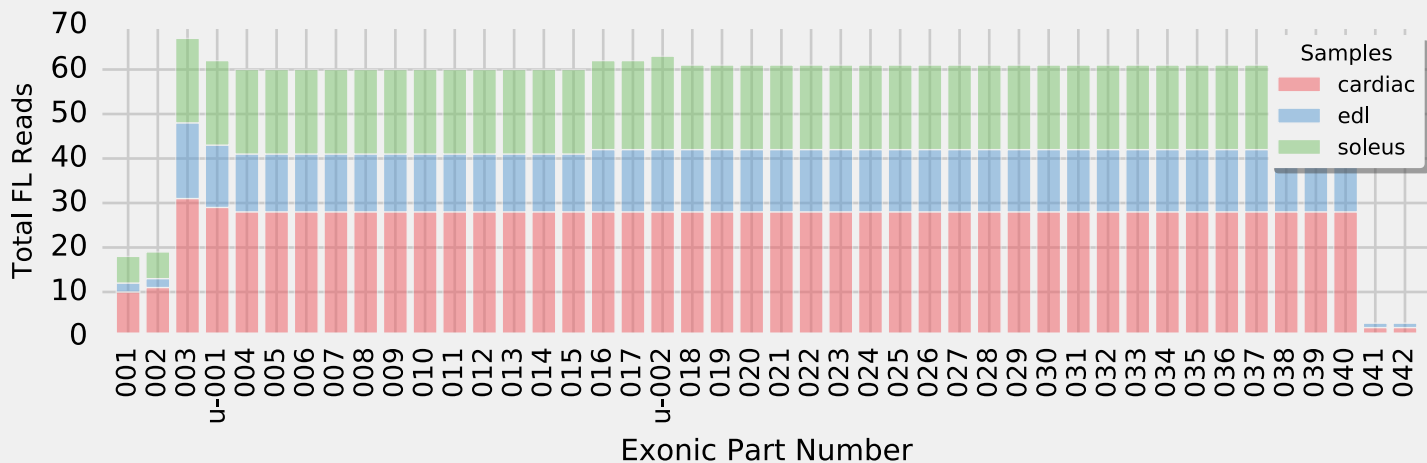

# Ptprm

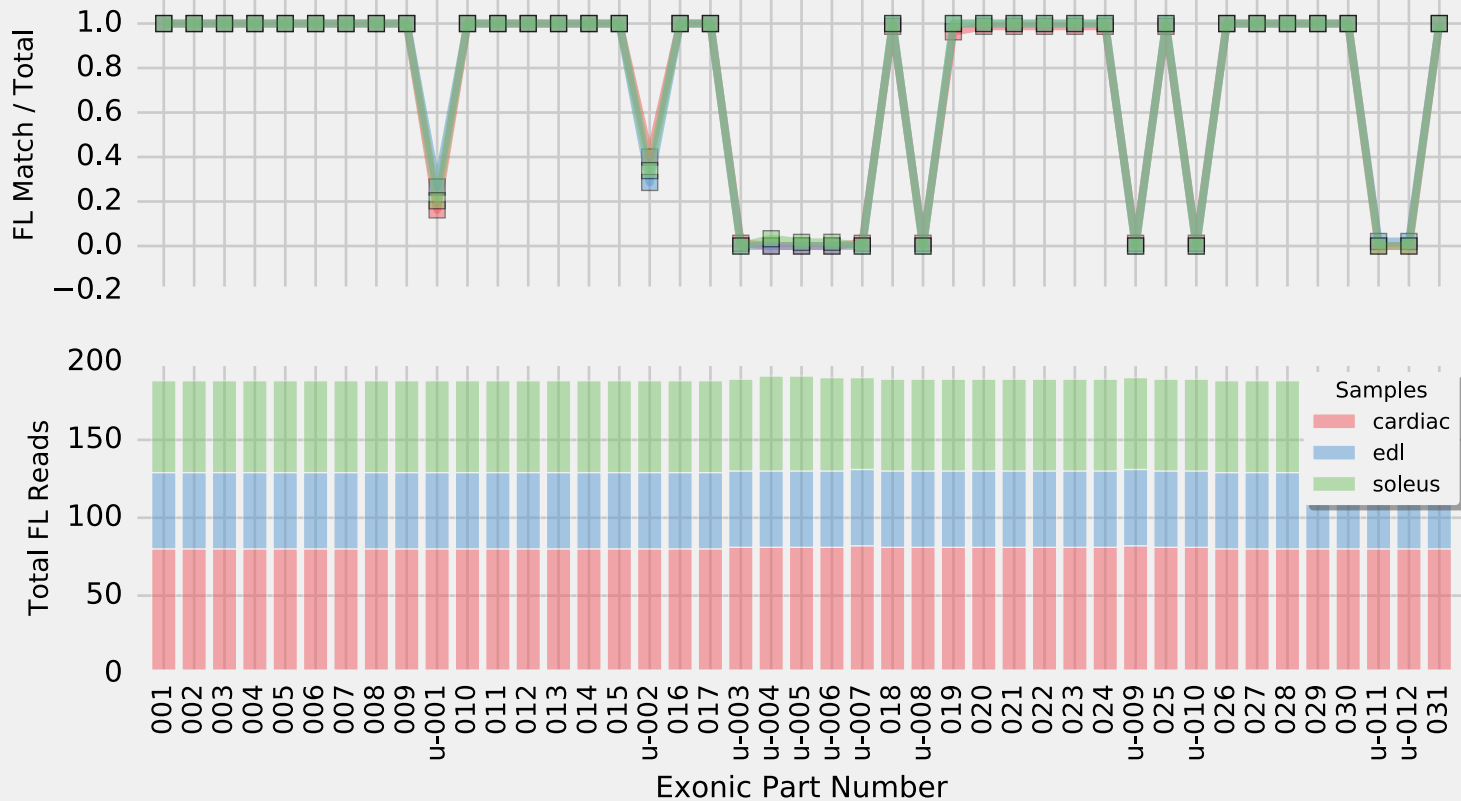



# Pum1

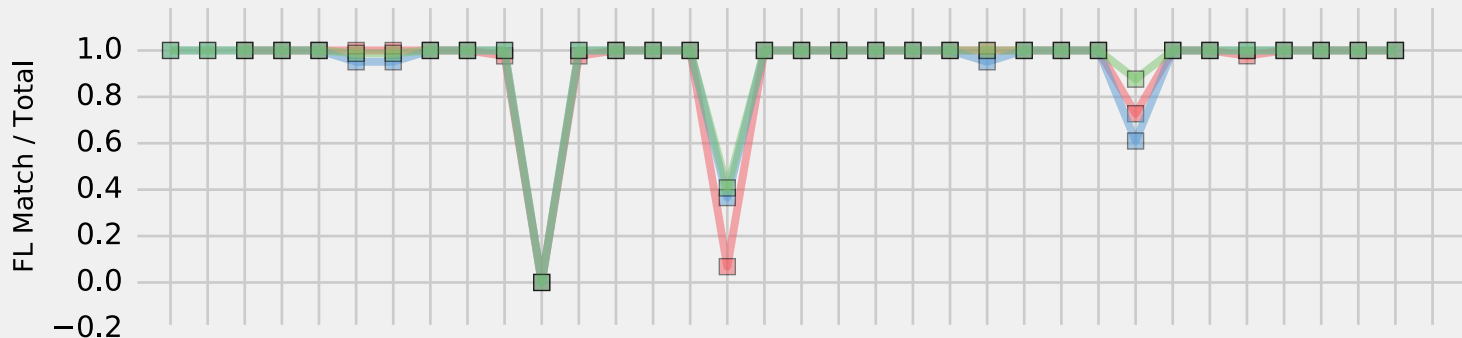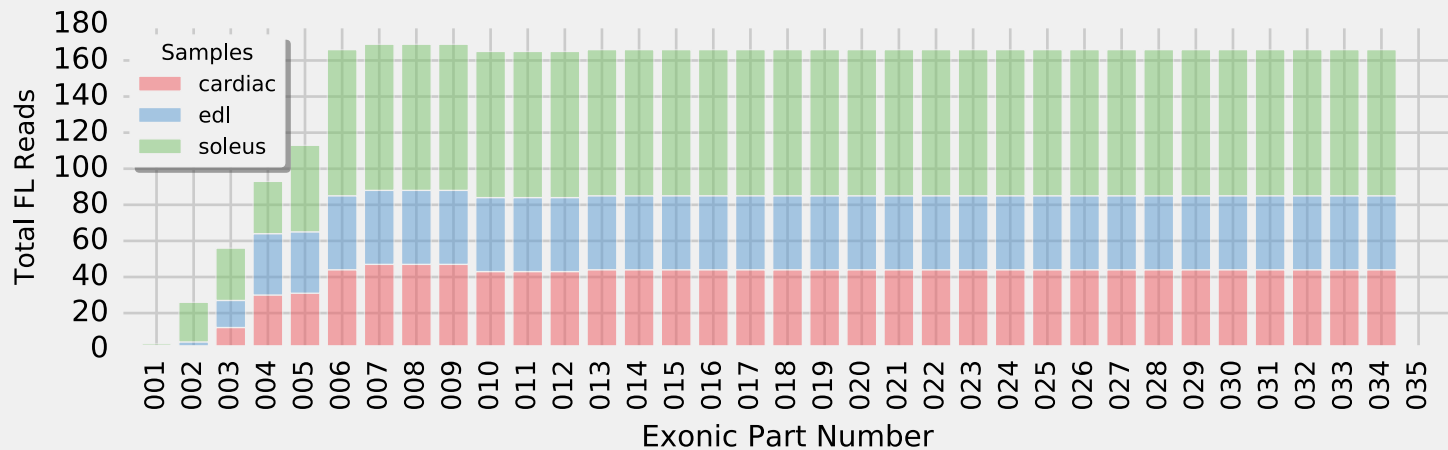

# Pum2

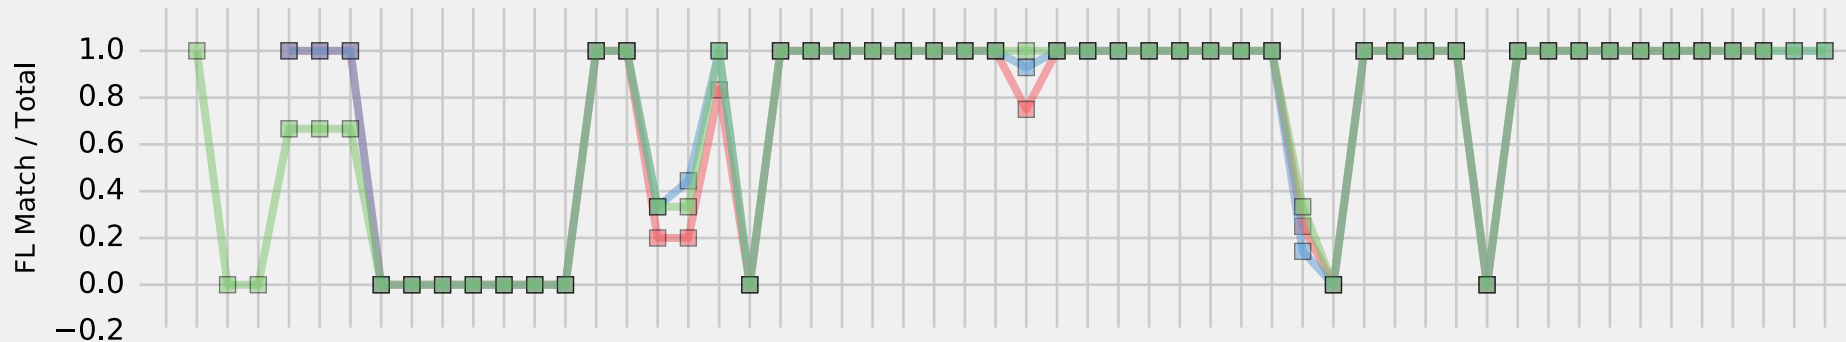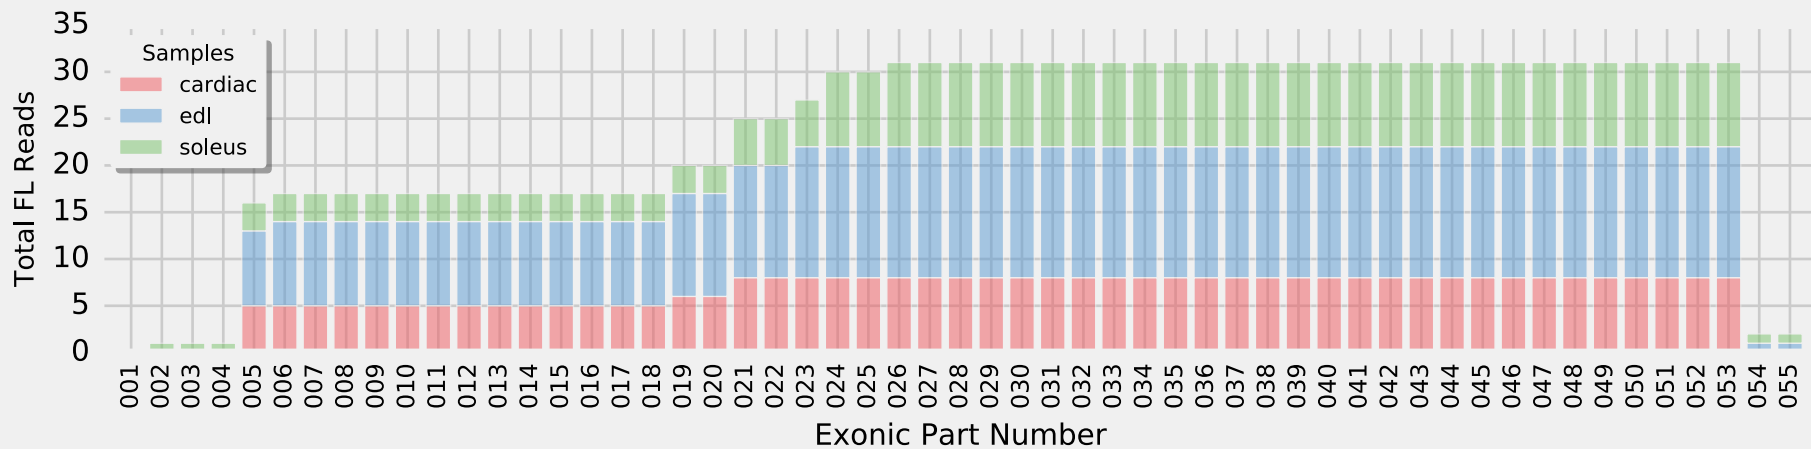

# Pxdn

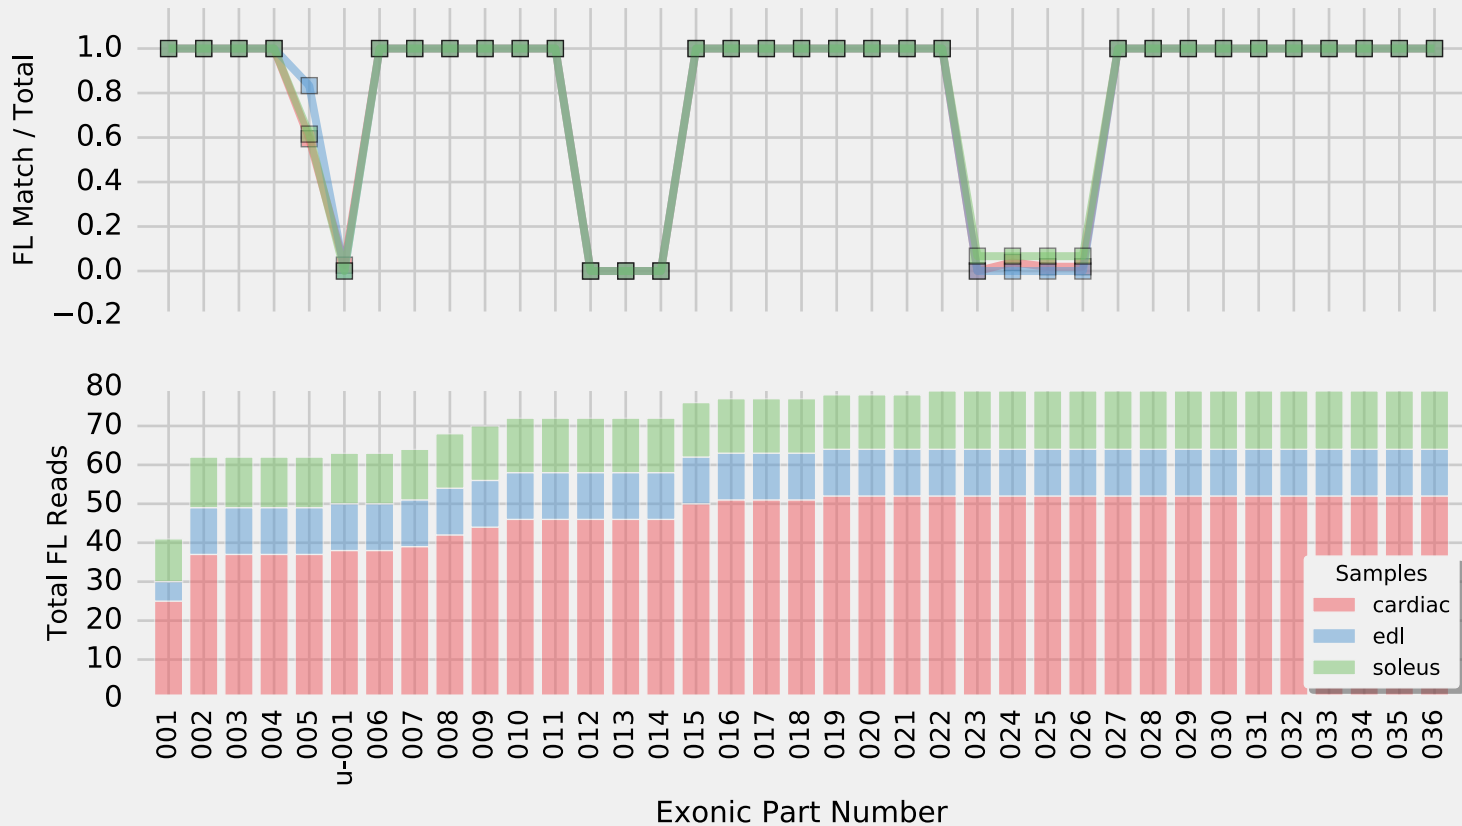

# Pxn

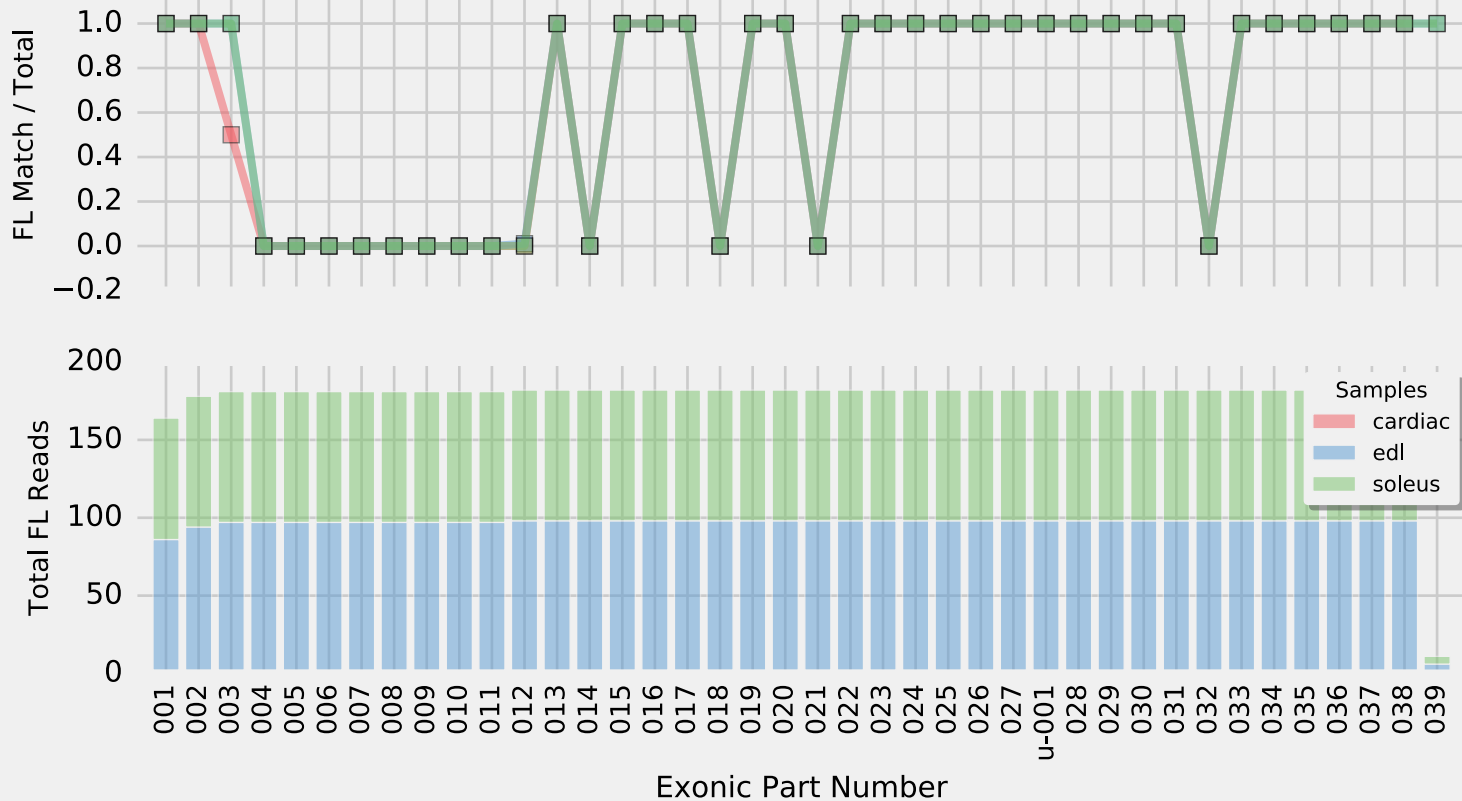

# Qser1

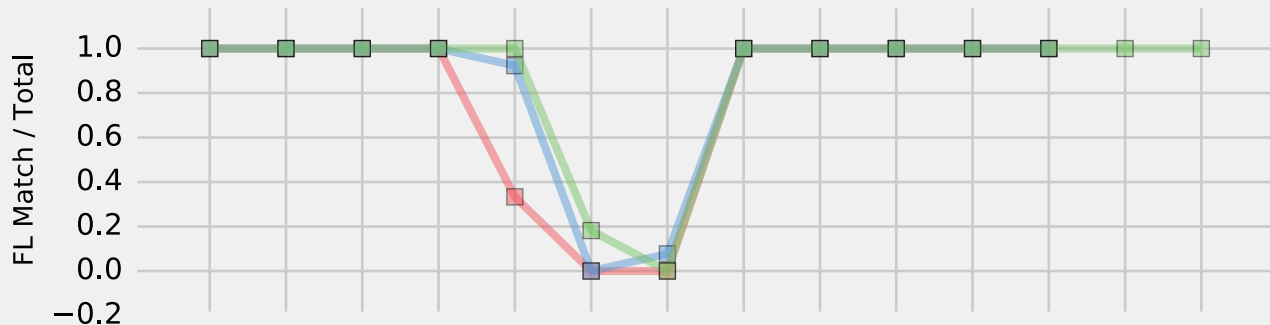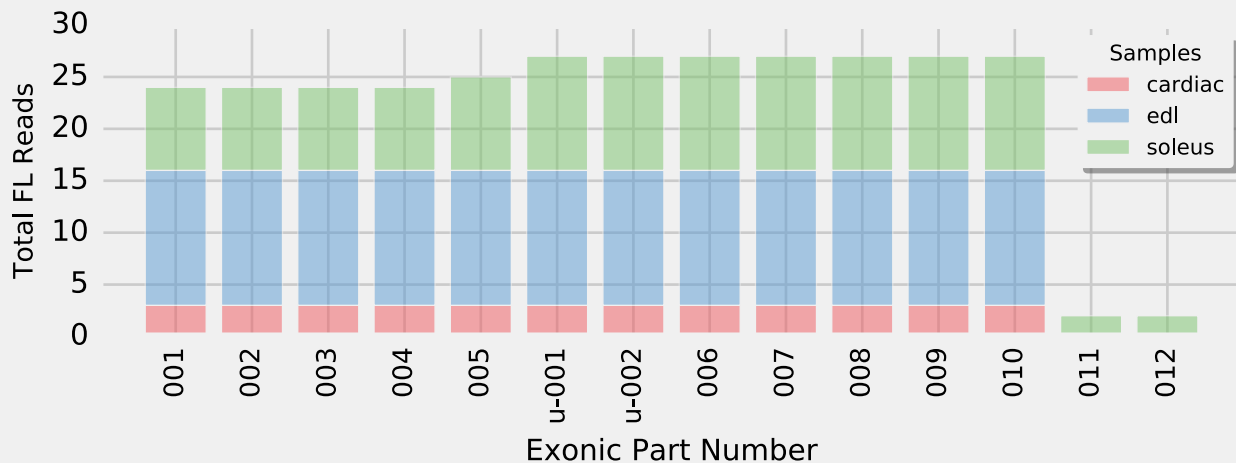

# Rabep1

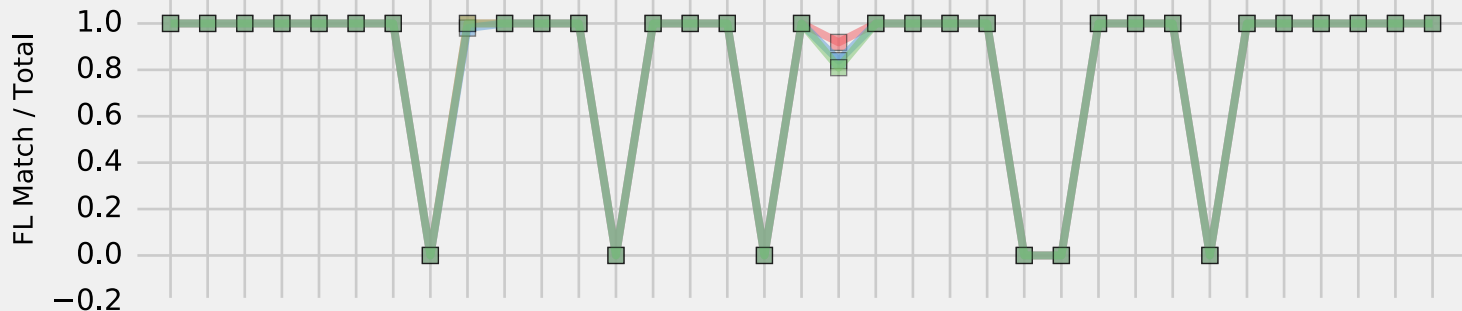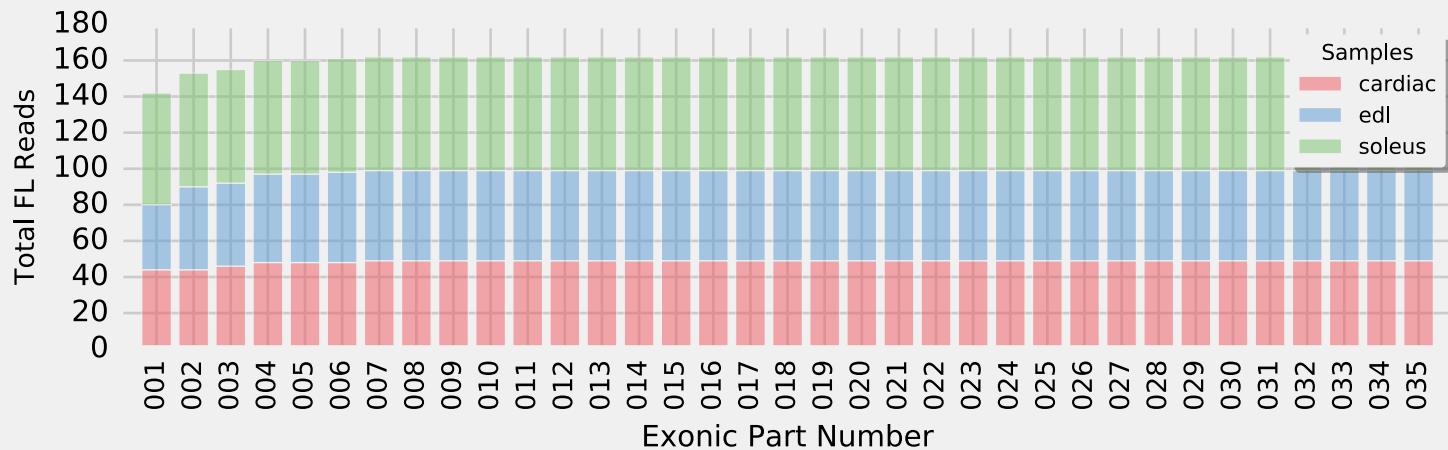

# Ralgapa1

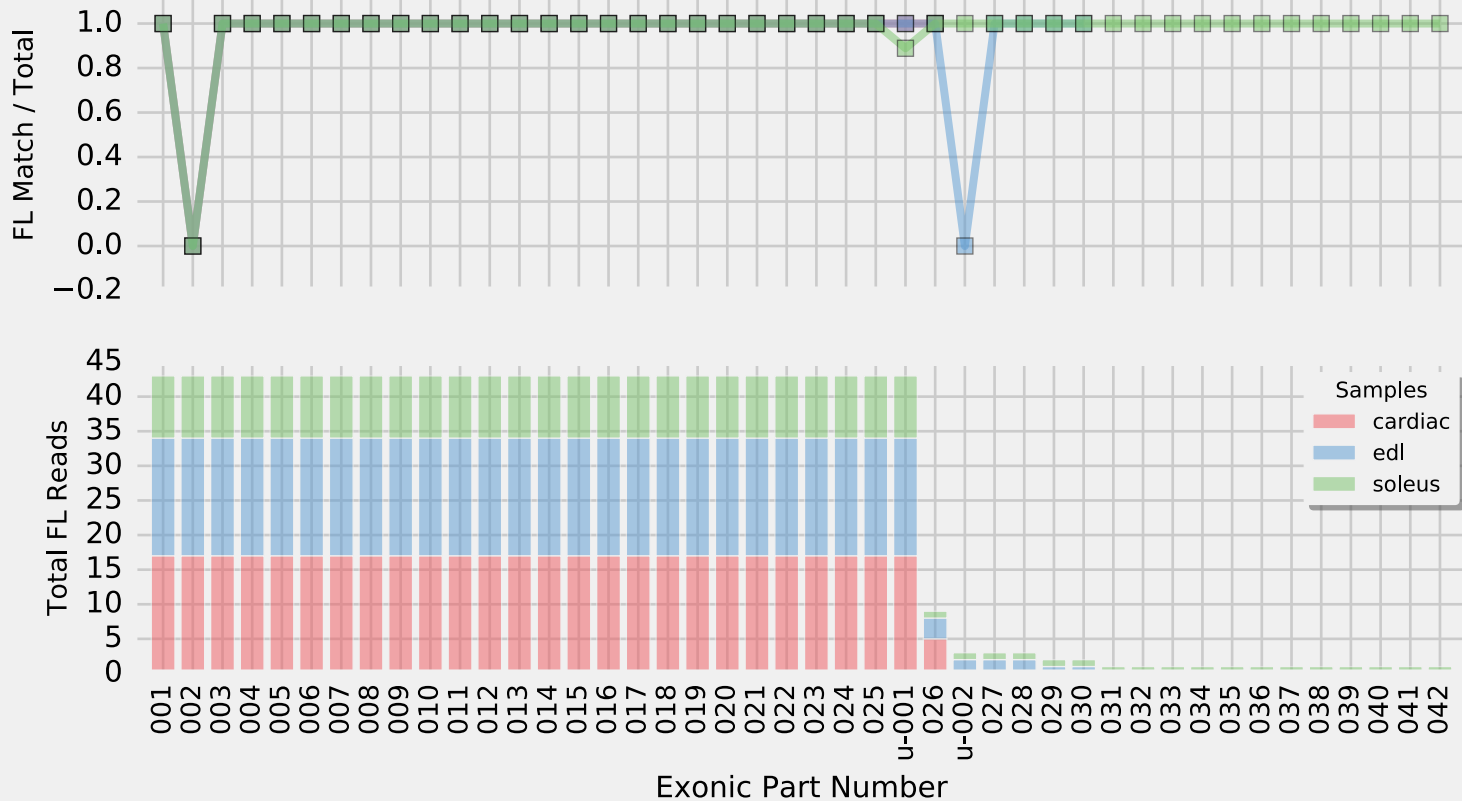

# Ranbp2

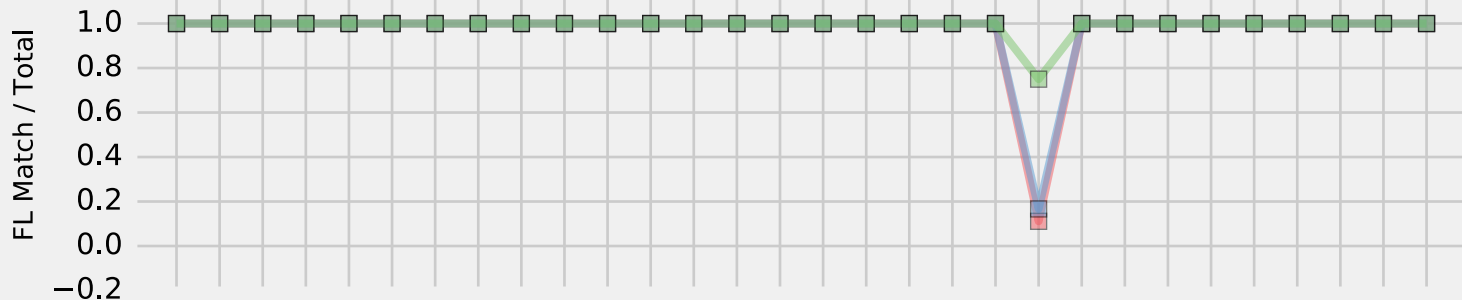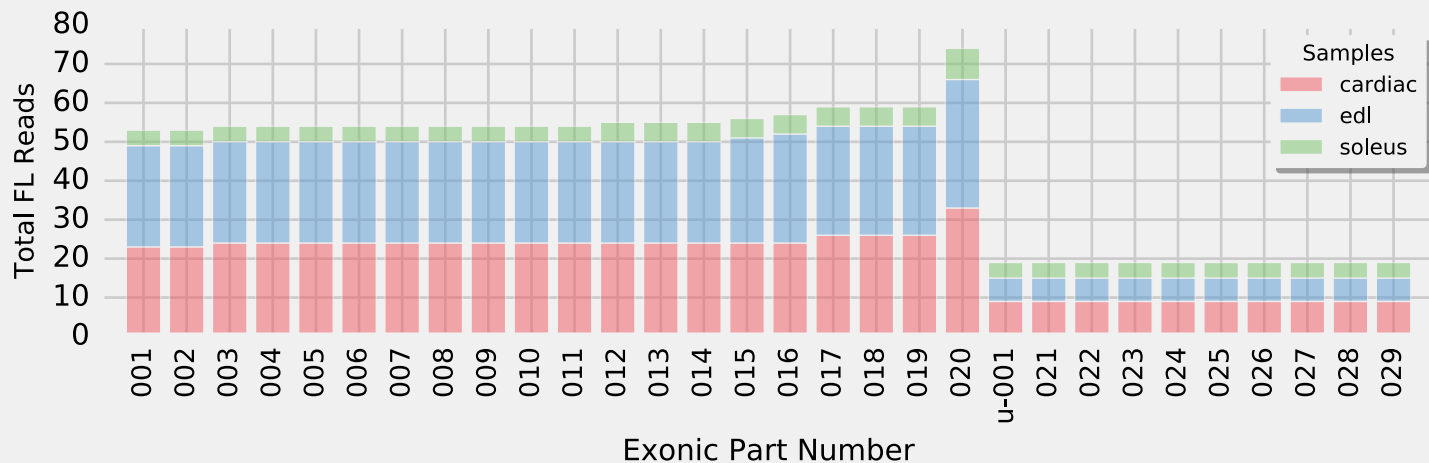



# Rap1gap2

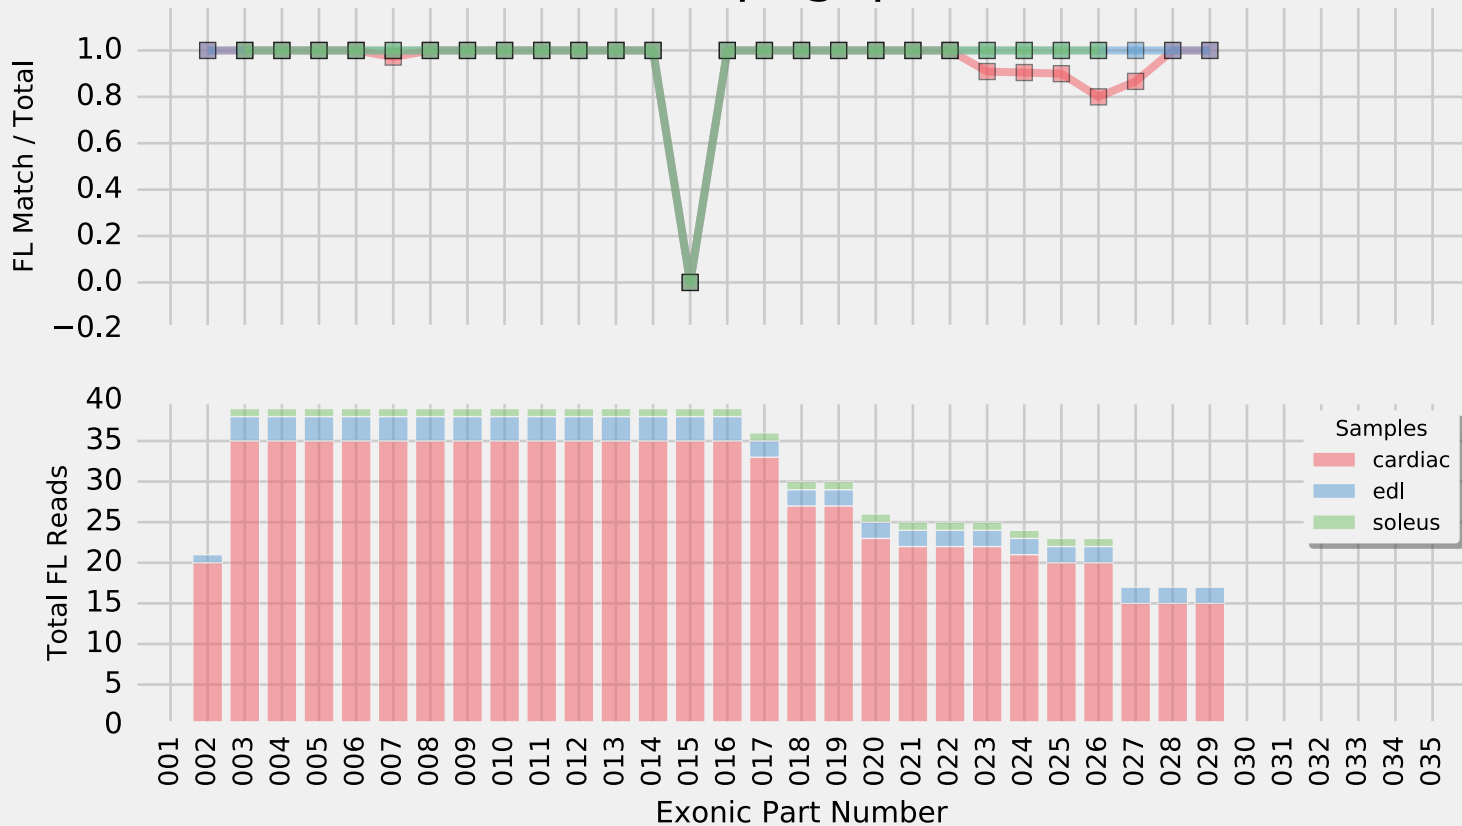

# Rapgef1

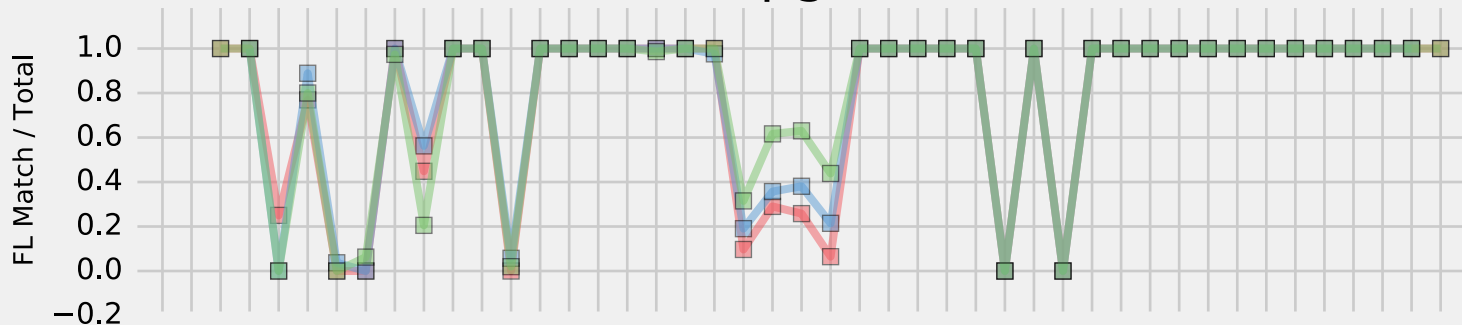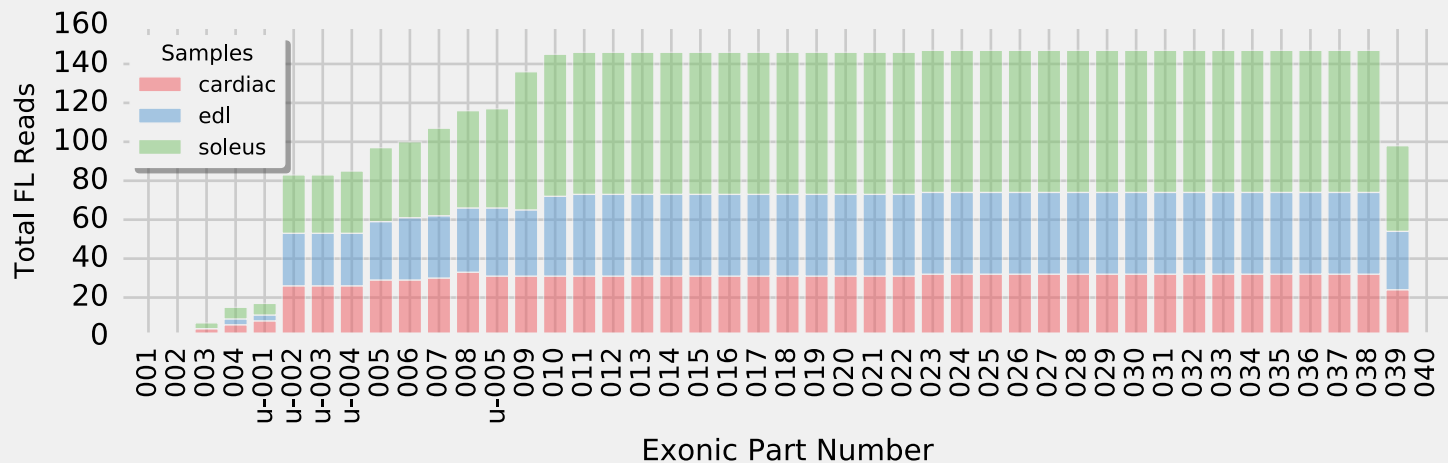

# Rapgef6

FL Match / Total

1.0  
0.8  
0.6  
0.4  
0.2  
0.0  
-0.2

Total FL Reads

30  
25  
20  
15  
10  
5  
0

001 002 003 004 005 006 007 008 009 010 011 012 013 014 015 016 017 018 019 020 021 022 023 024 025 026 027 028 029 030 031 032 033 034 035 036 037 038 039 040 041 042 043 044 045 046

Exonic Part Number

Samples

cardiac  
edl  
soleus

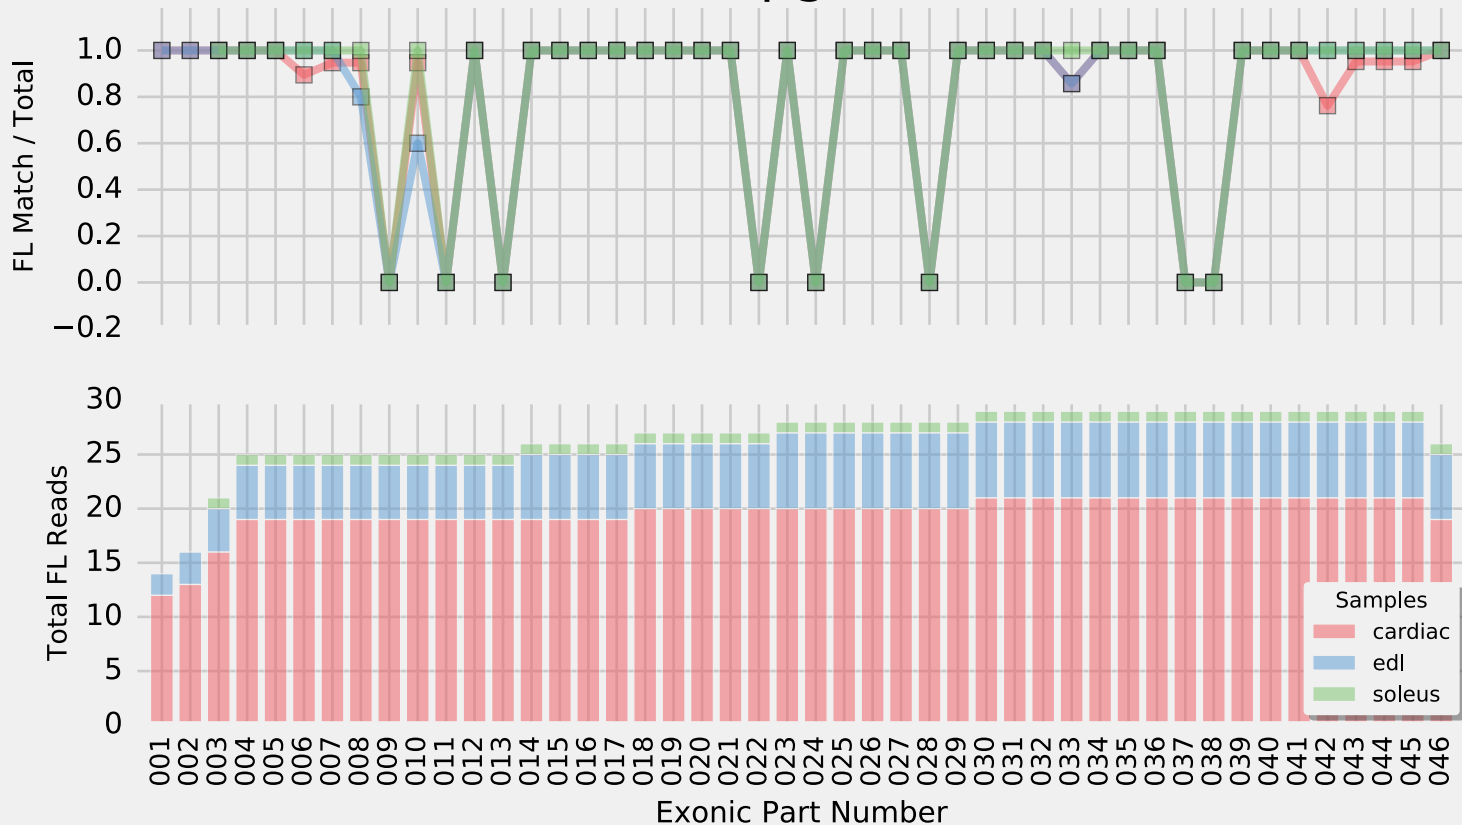

# Rb1cc1

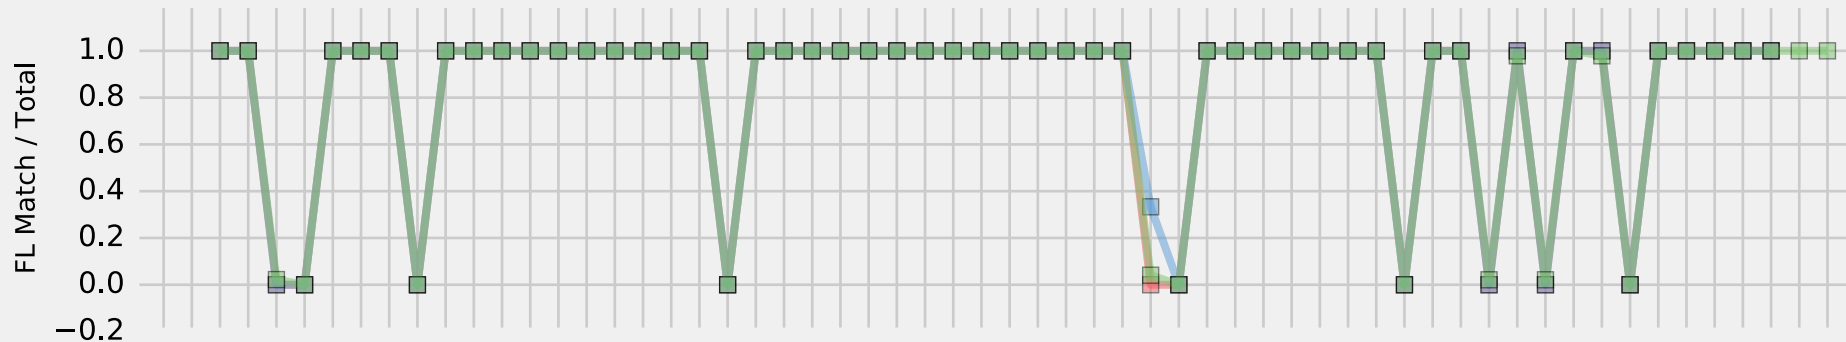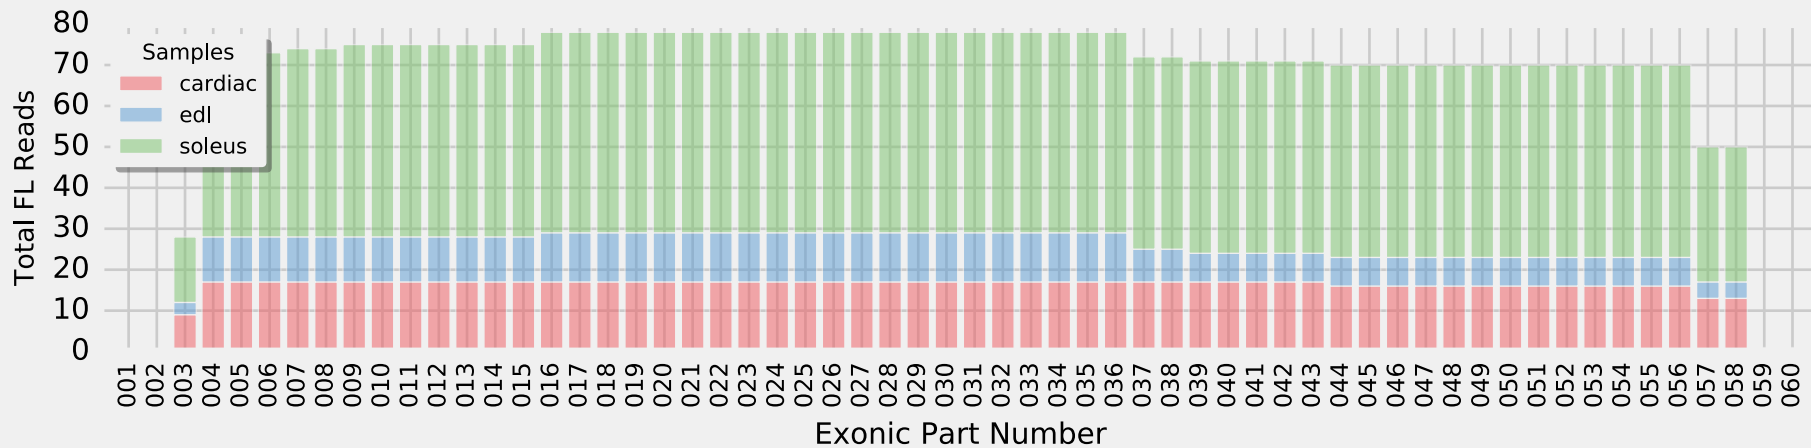

# Rbfox2

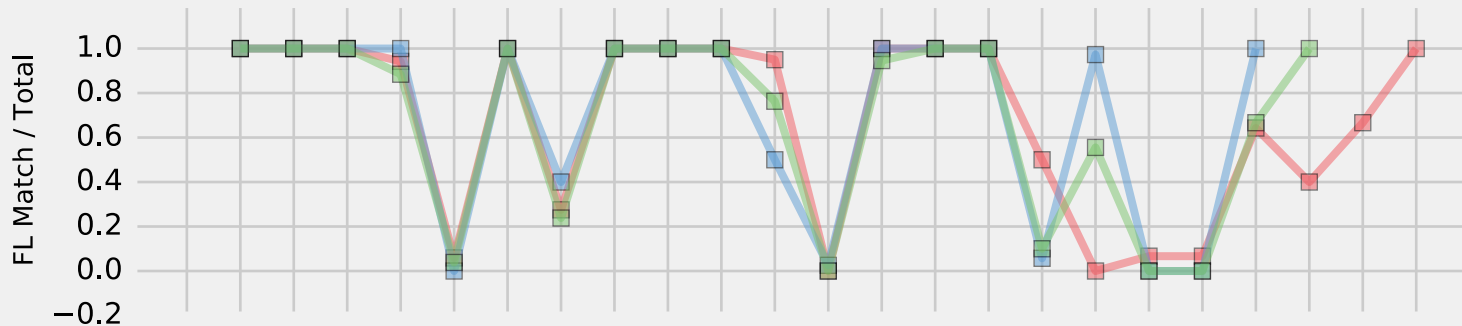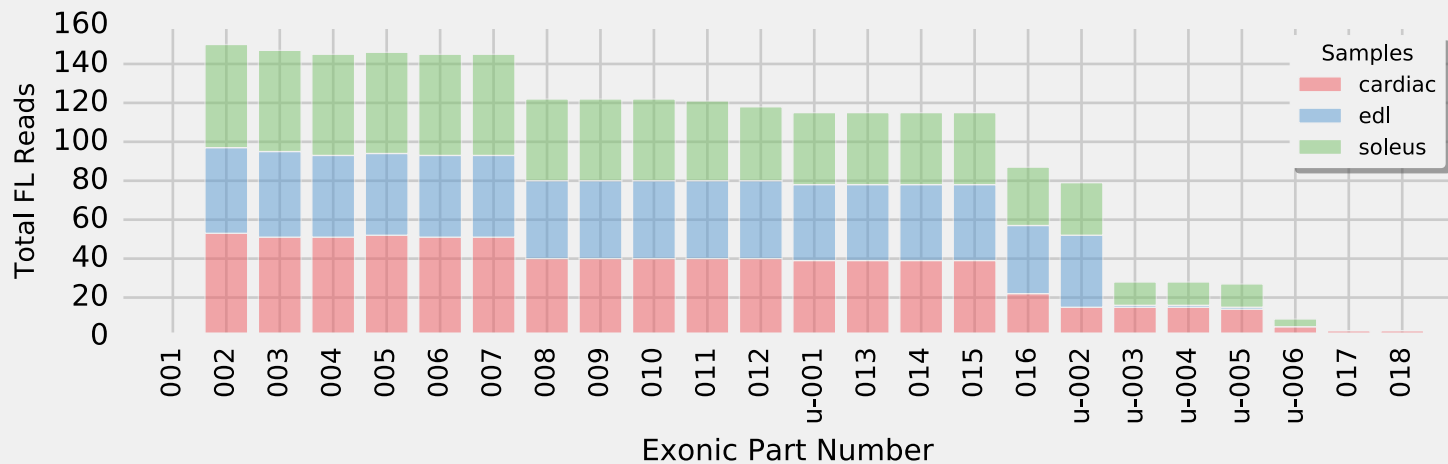

# Rbm20

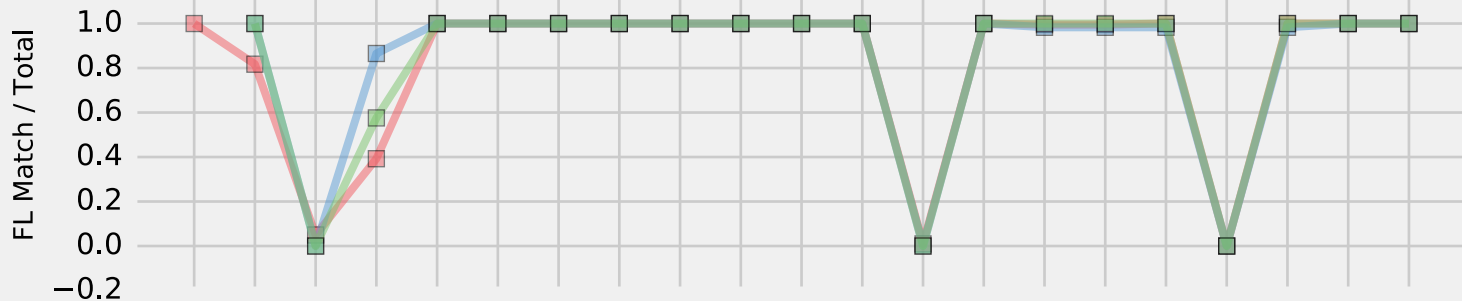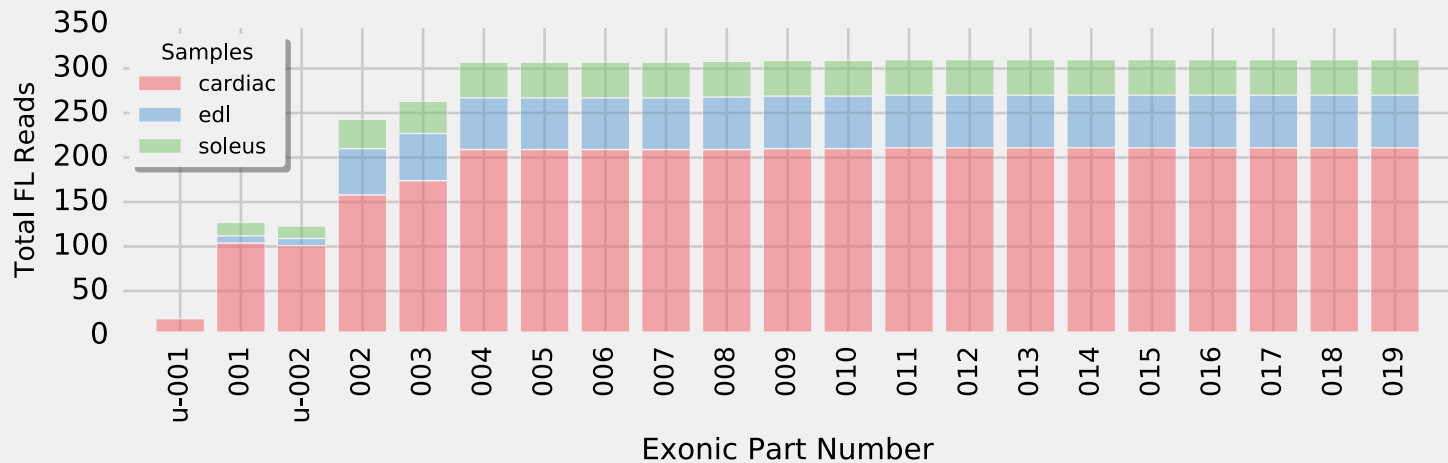

# Rbm41

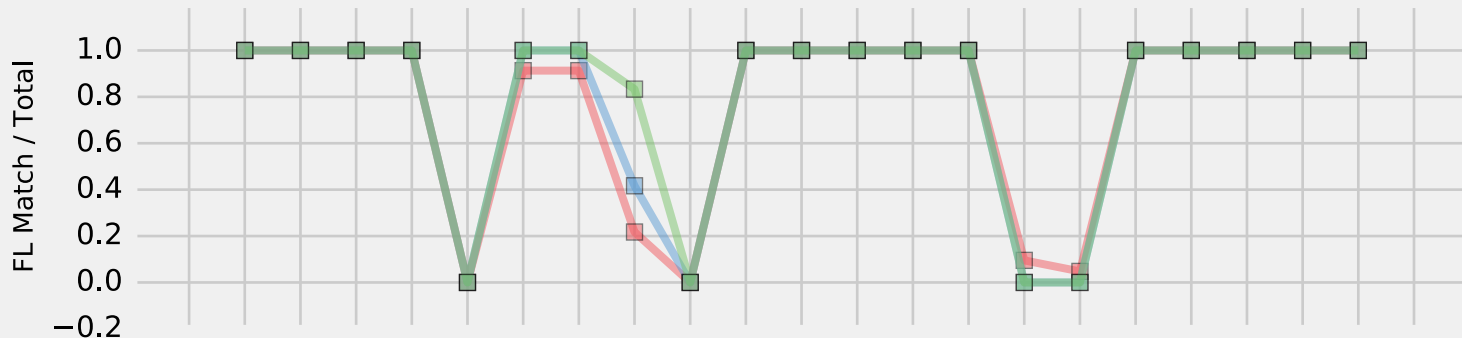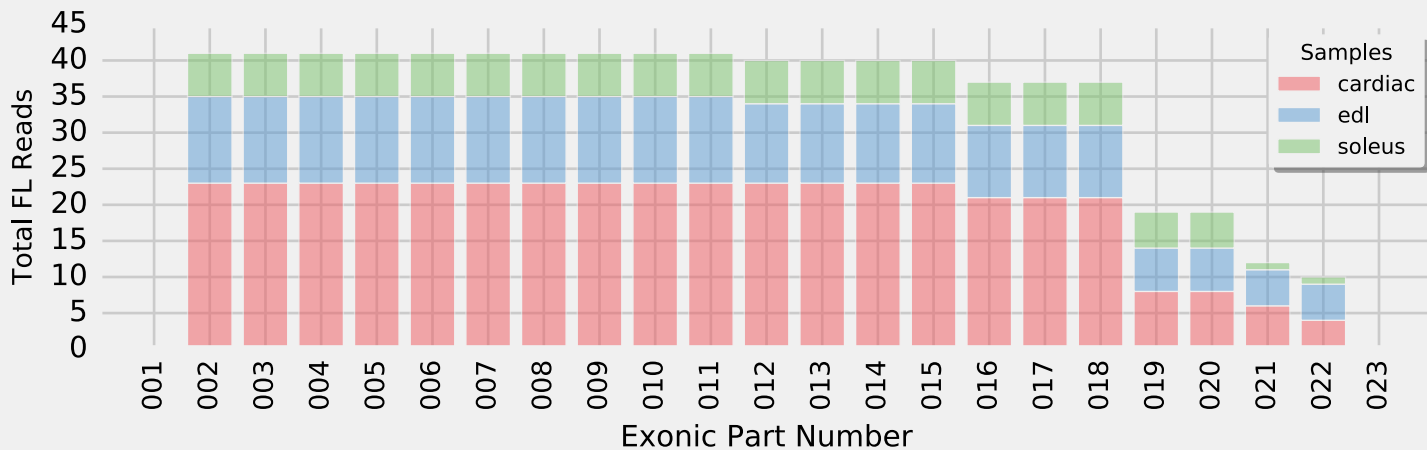

# Rbms2

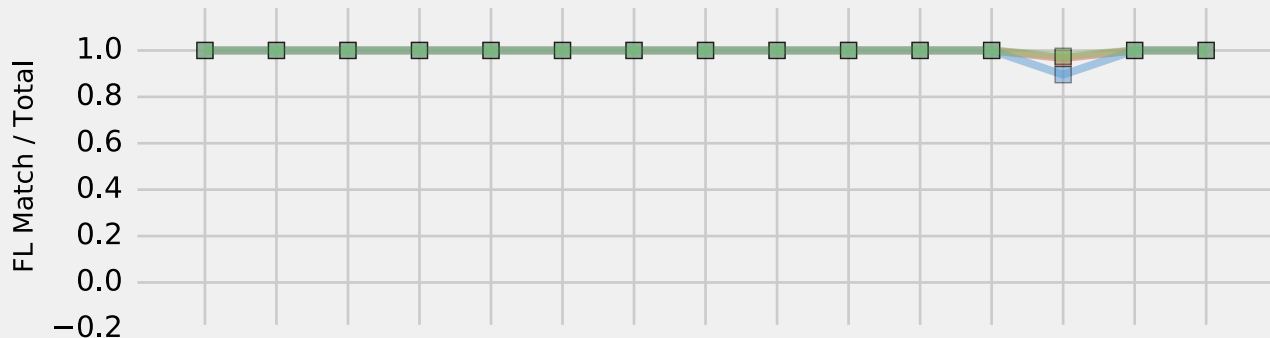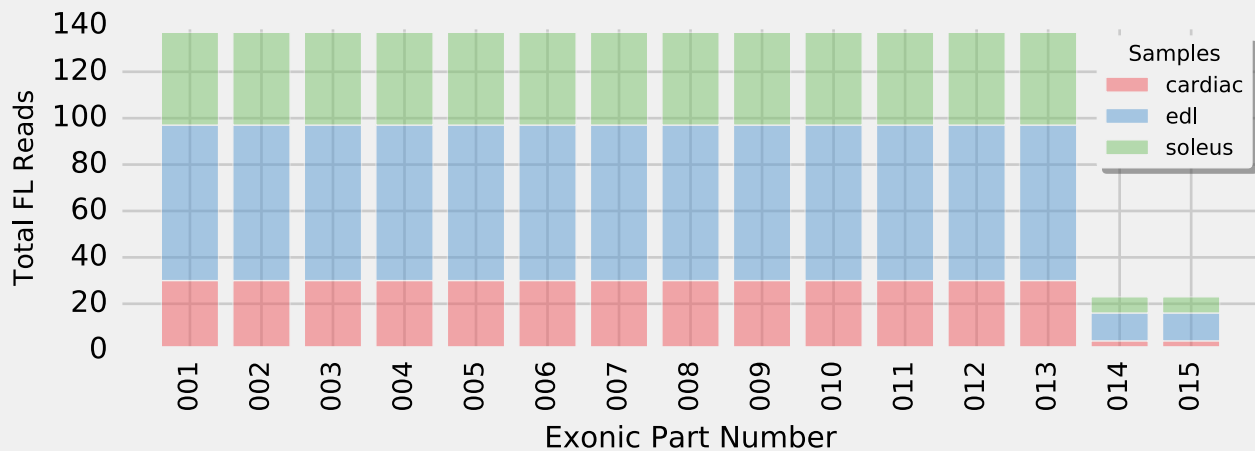



# Rgs12

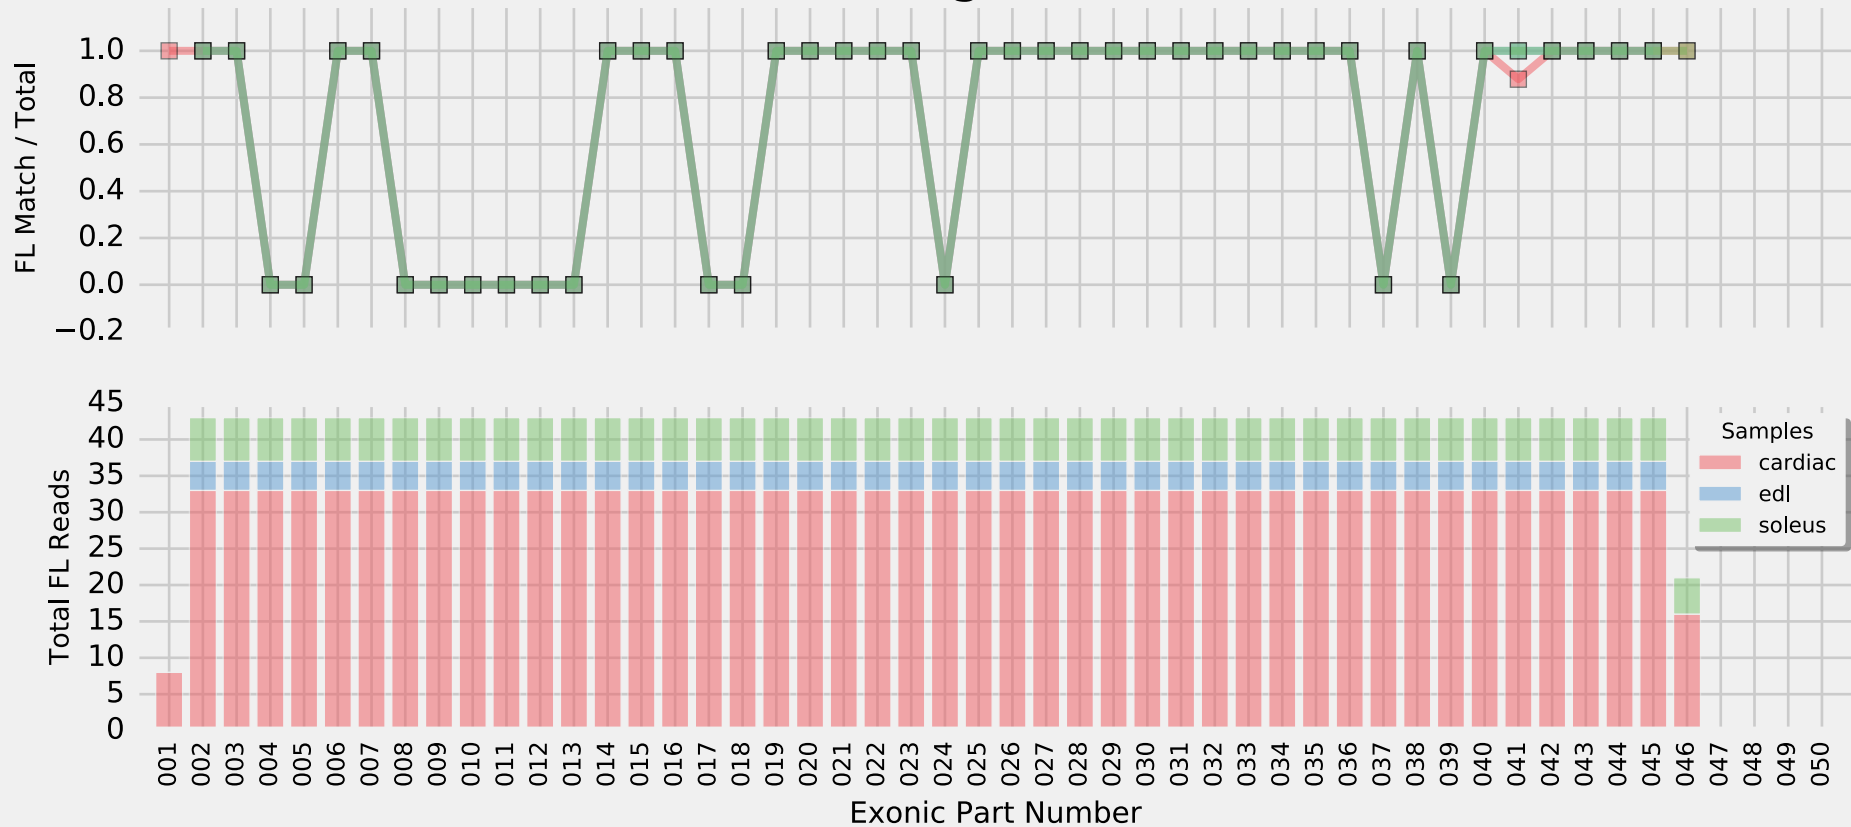

# Rlf

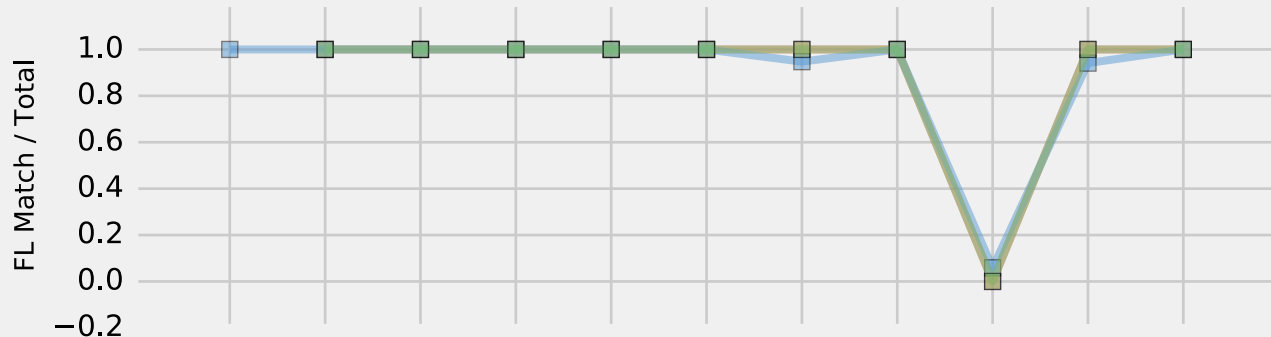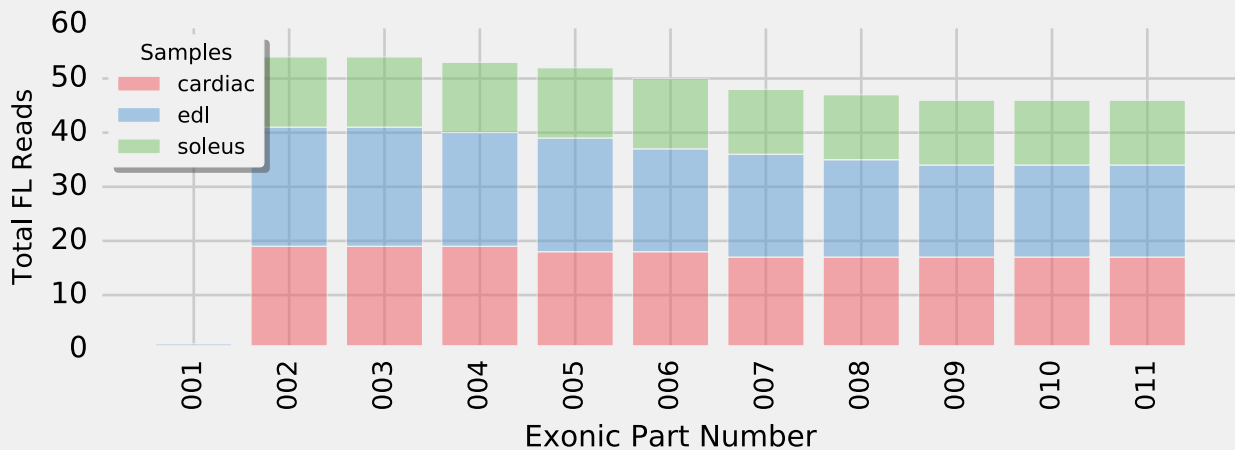

# Rlim

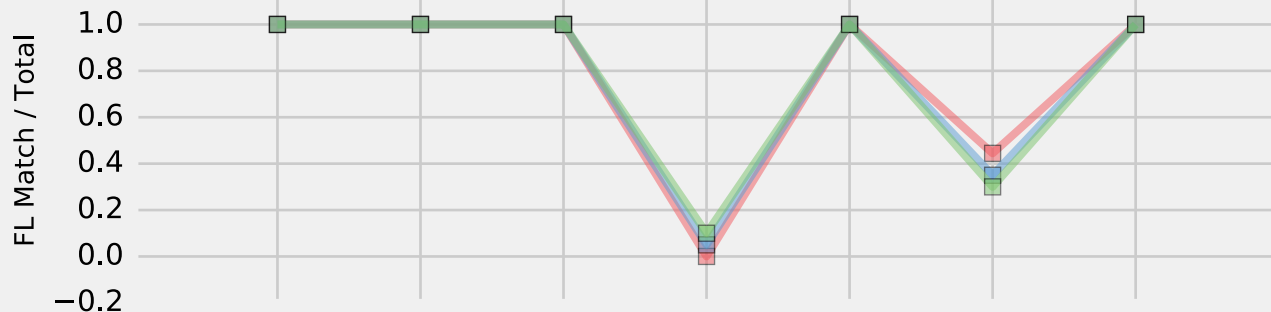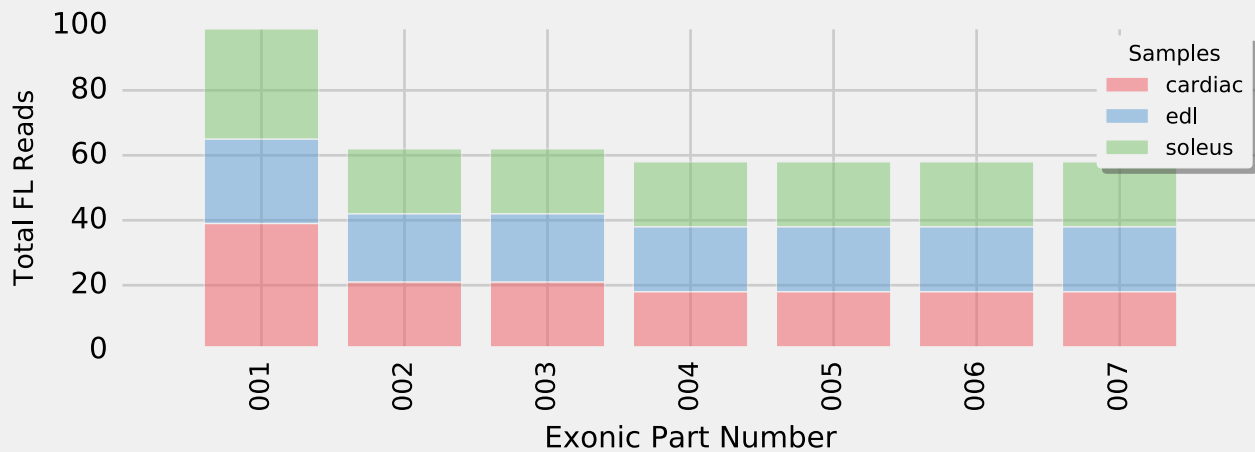

# Rmnd5a

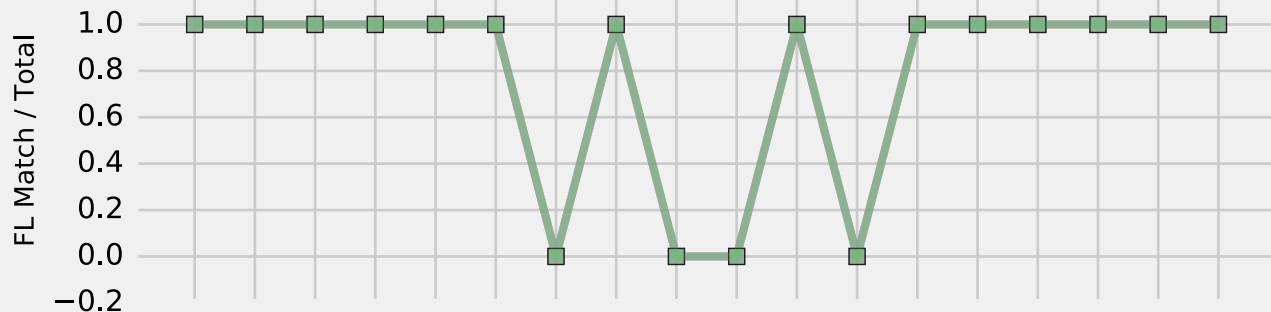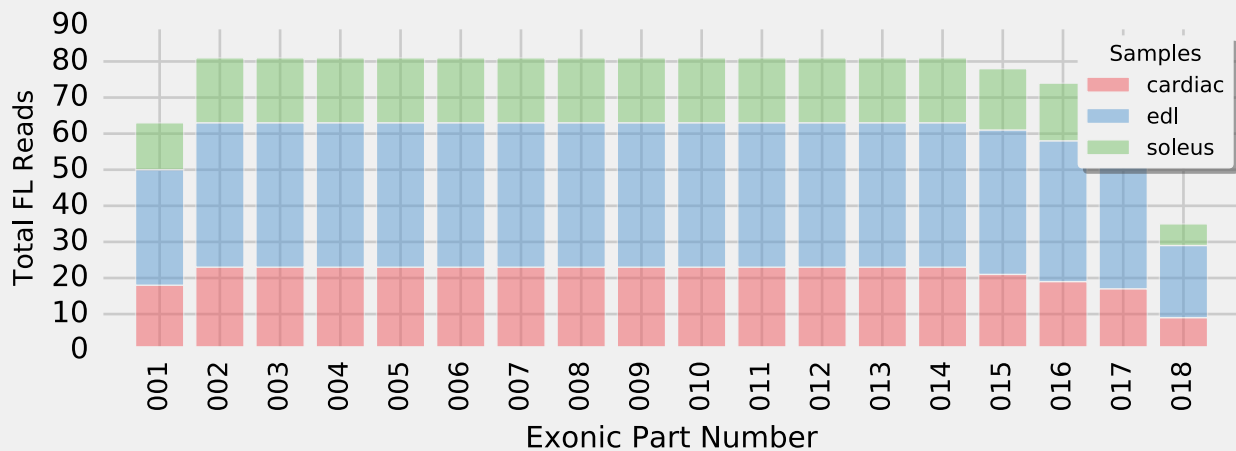

# Rock2

FL Match / Total

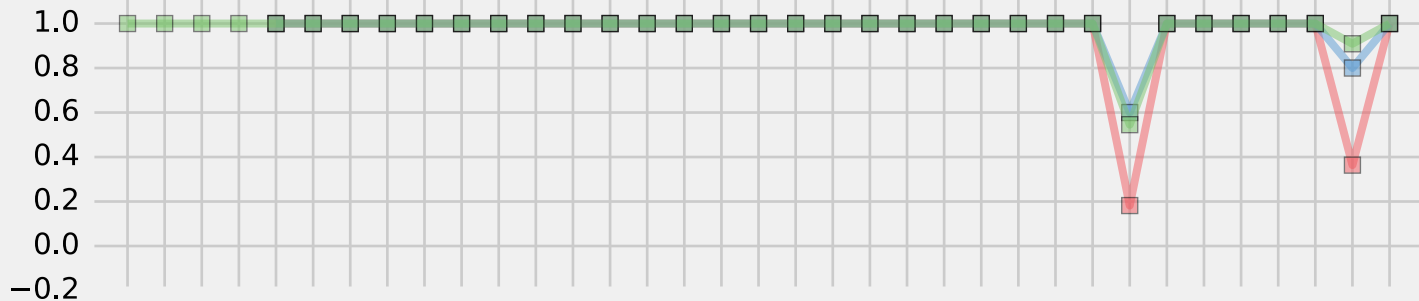

Total FL Reads

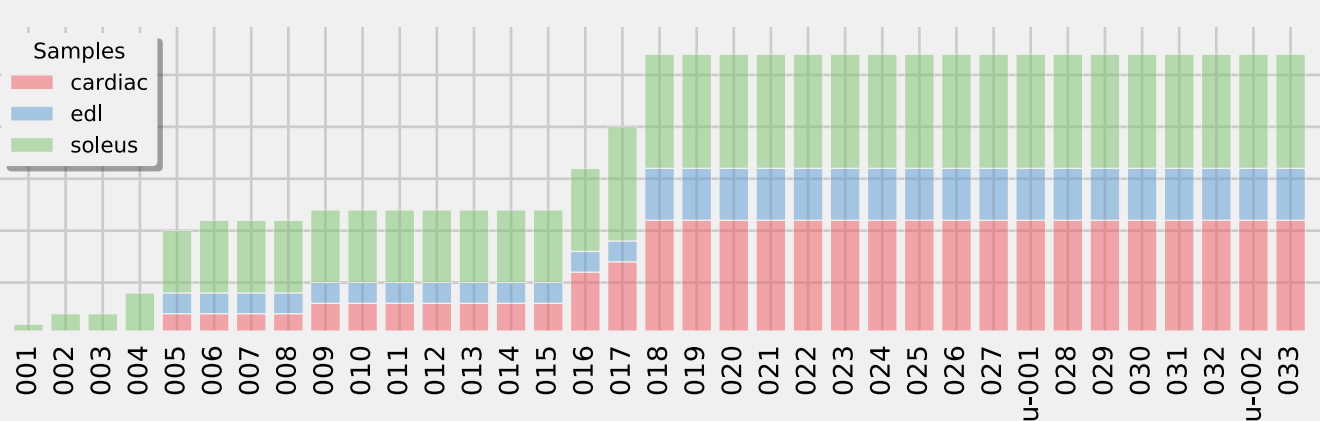

Exonic Part Number

# Rps6ka2

FL Match / Total

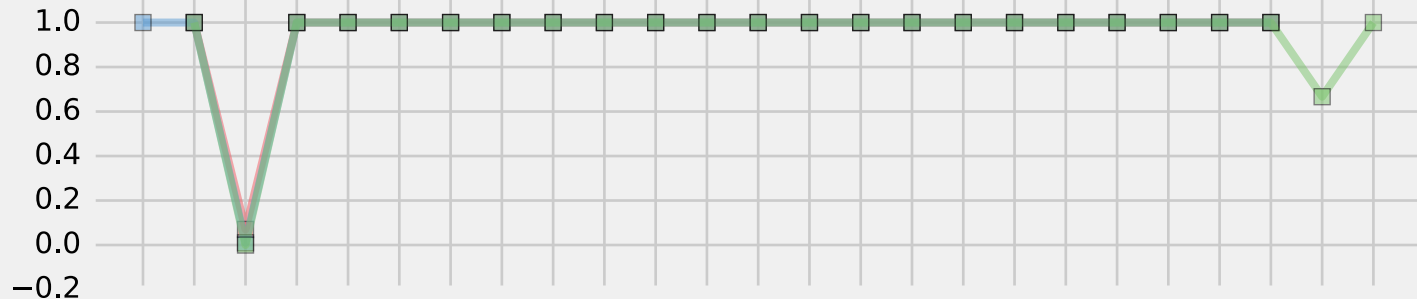

Total FL Reads

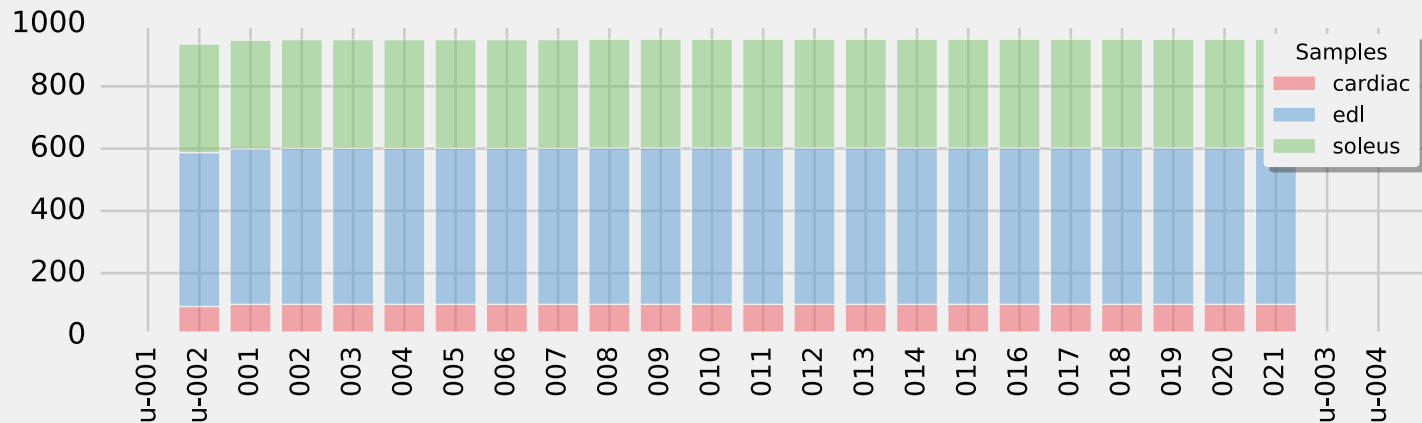

Exonic Part Number

# Rps6ka3

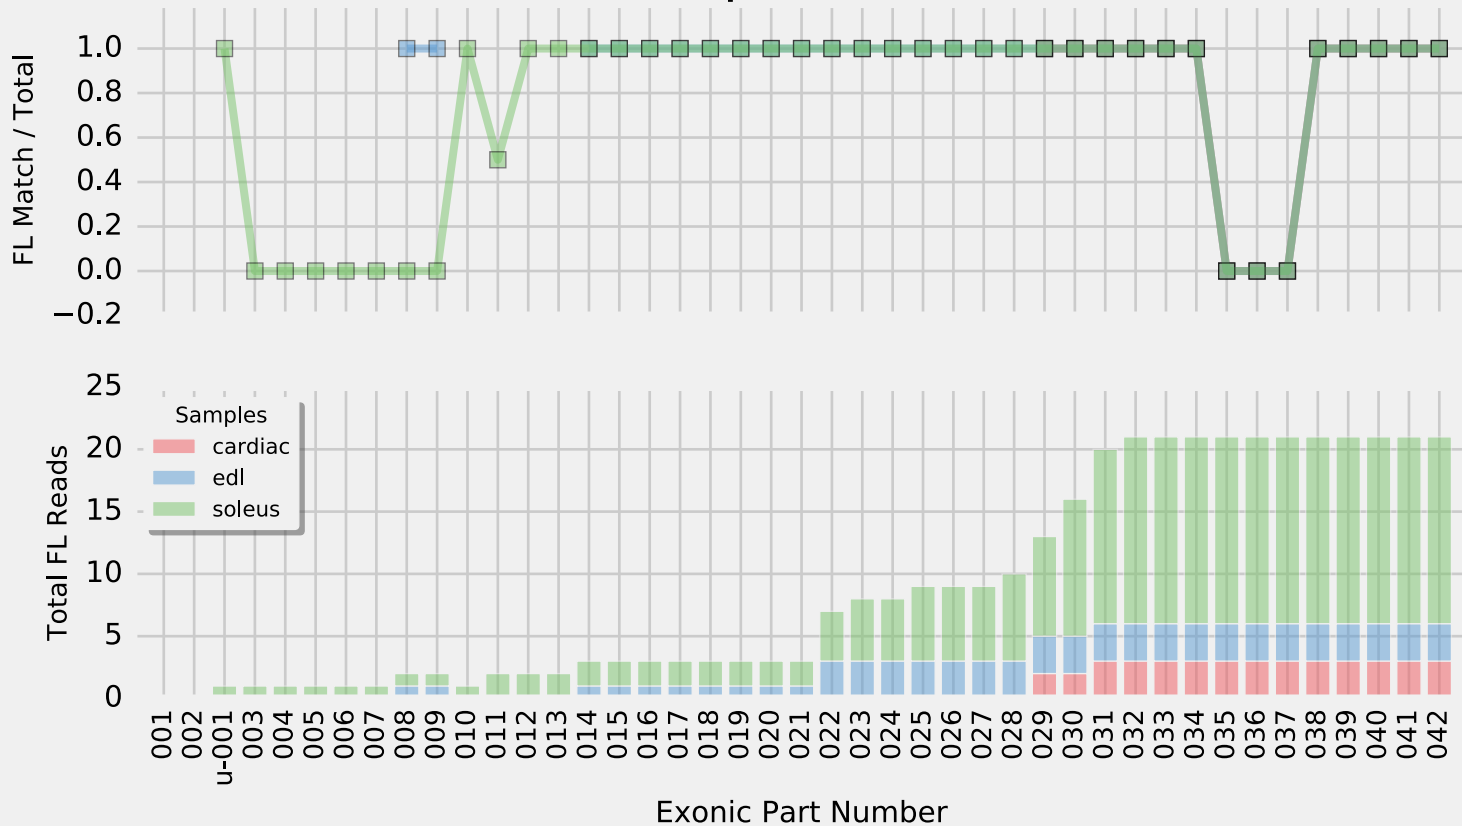

# Rragd

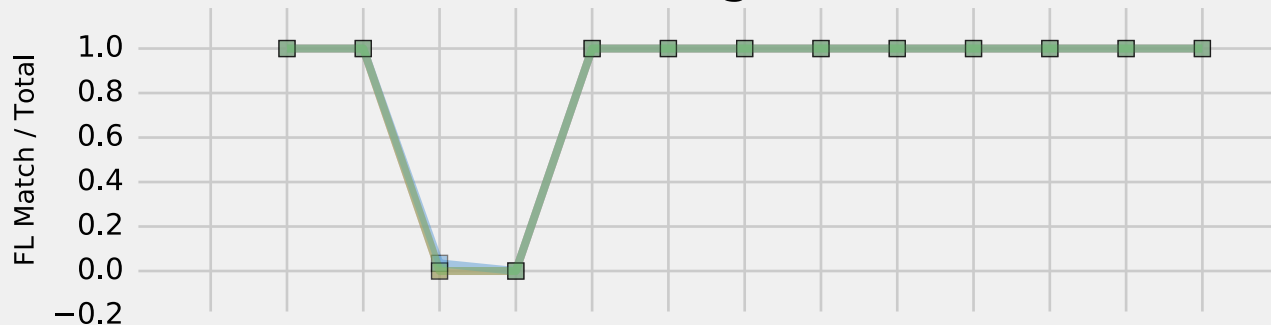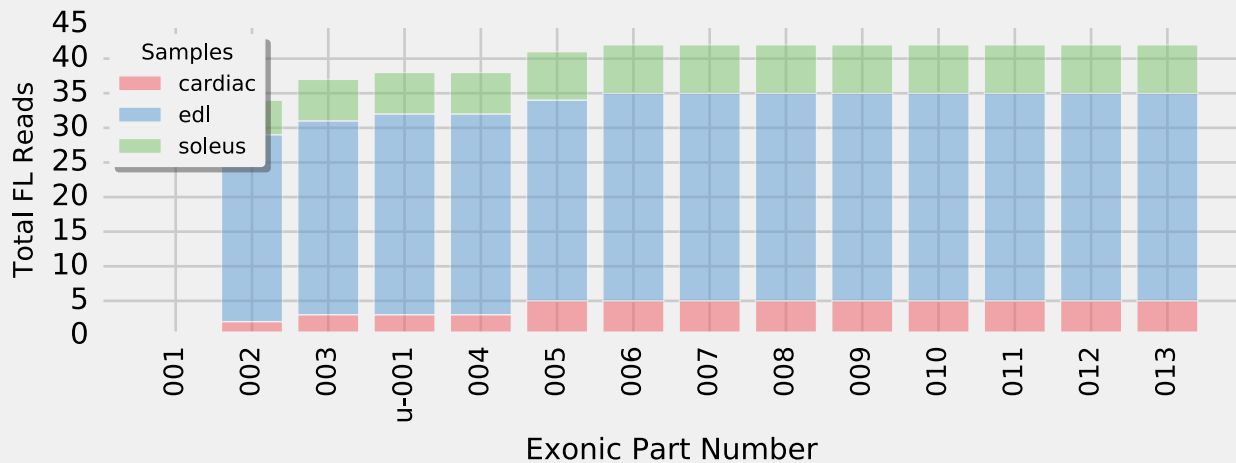



# Rrp12

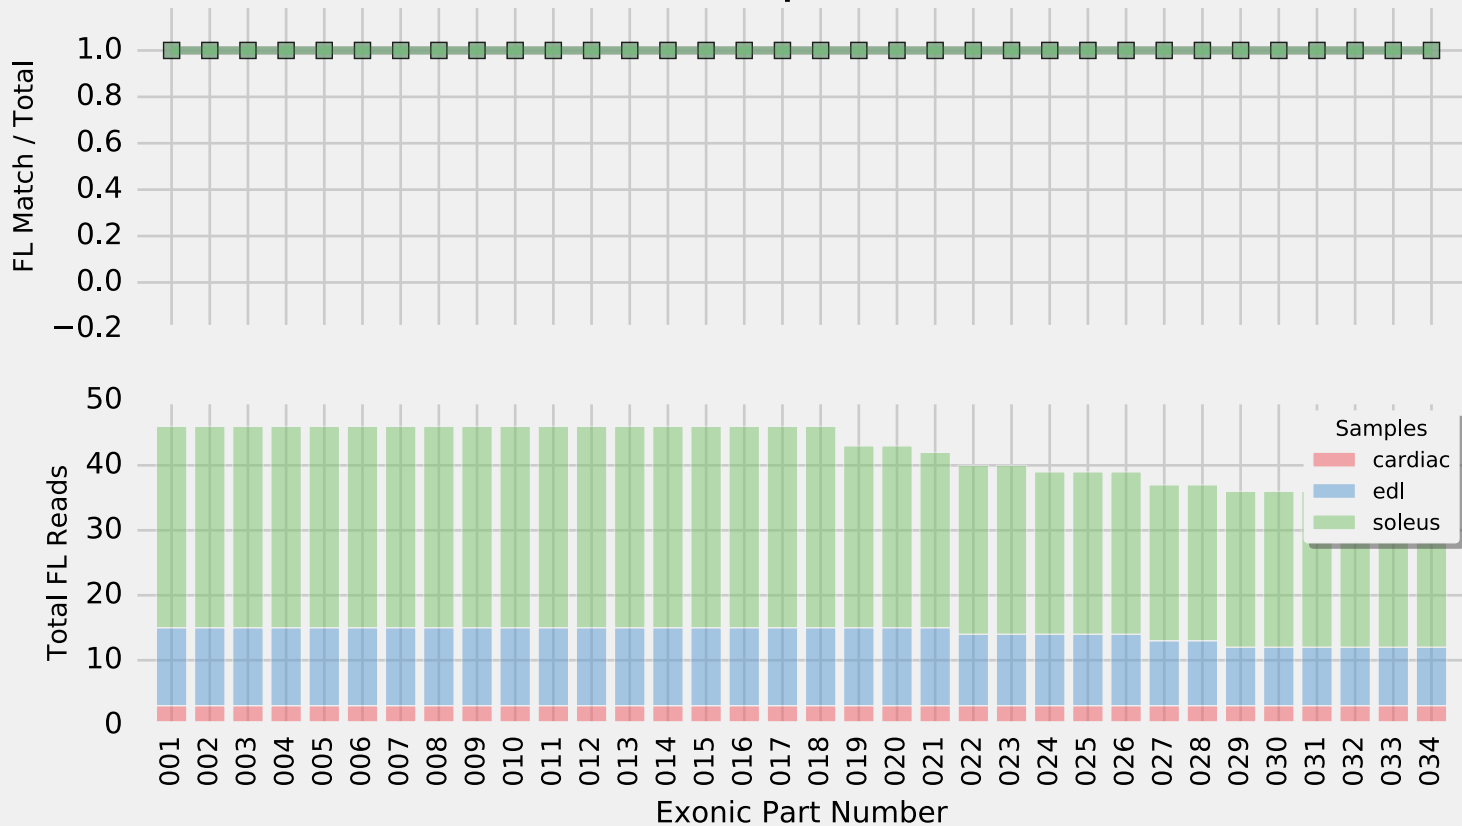

# Rubcn

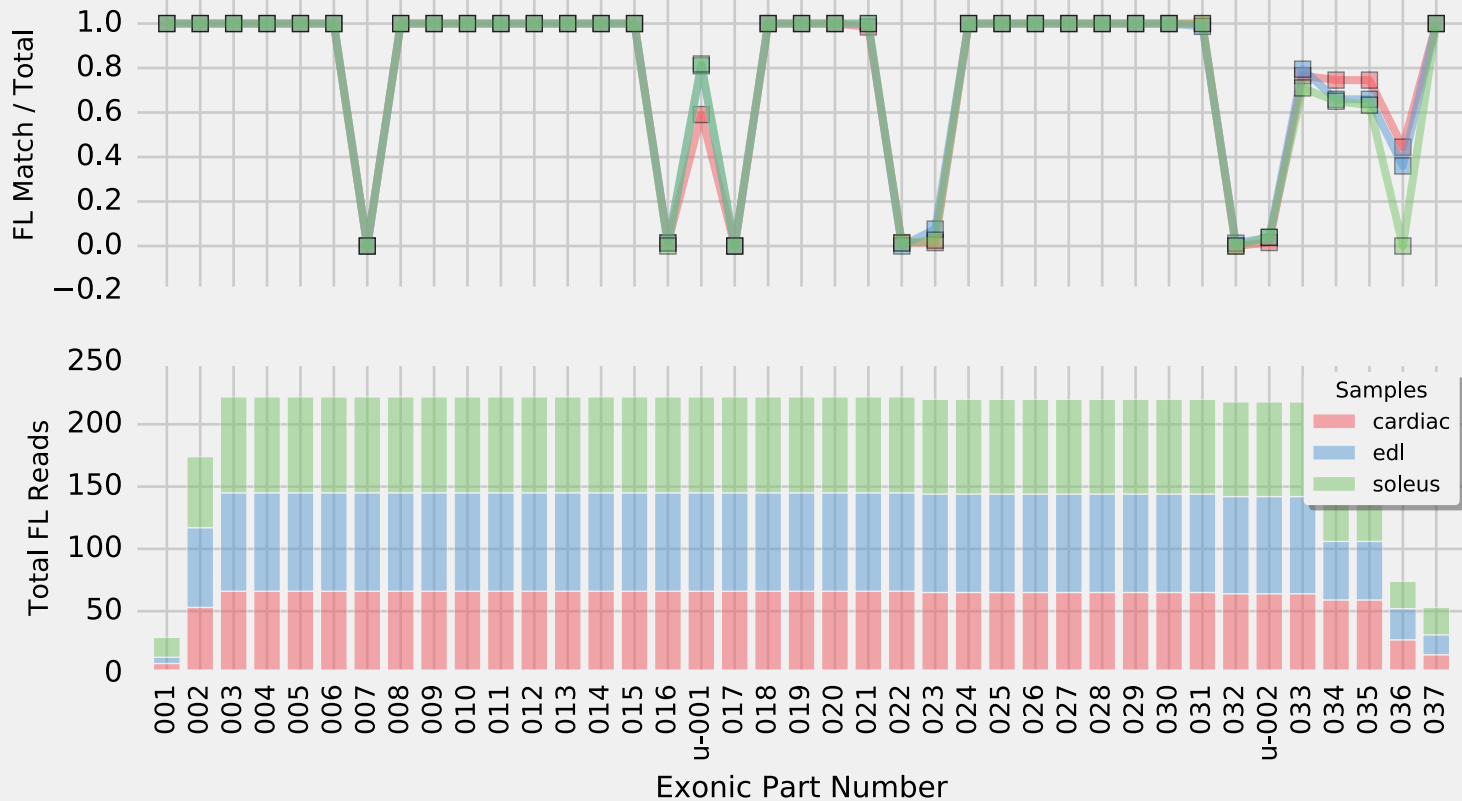

# Ryr1

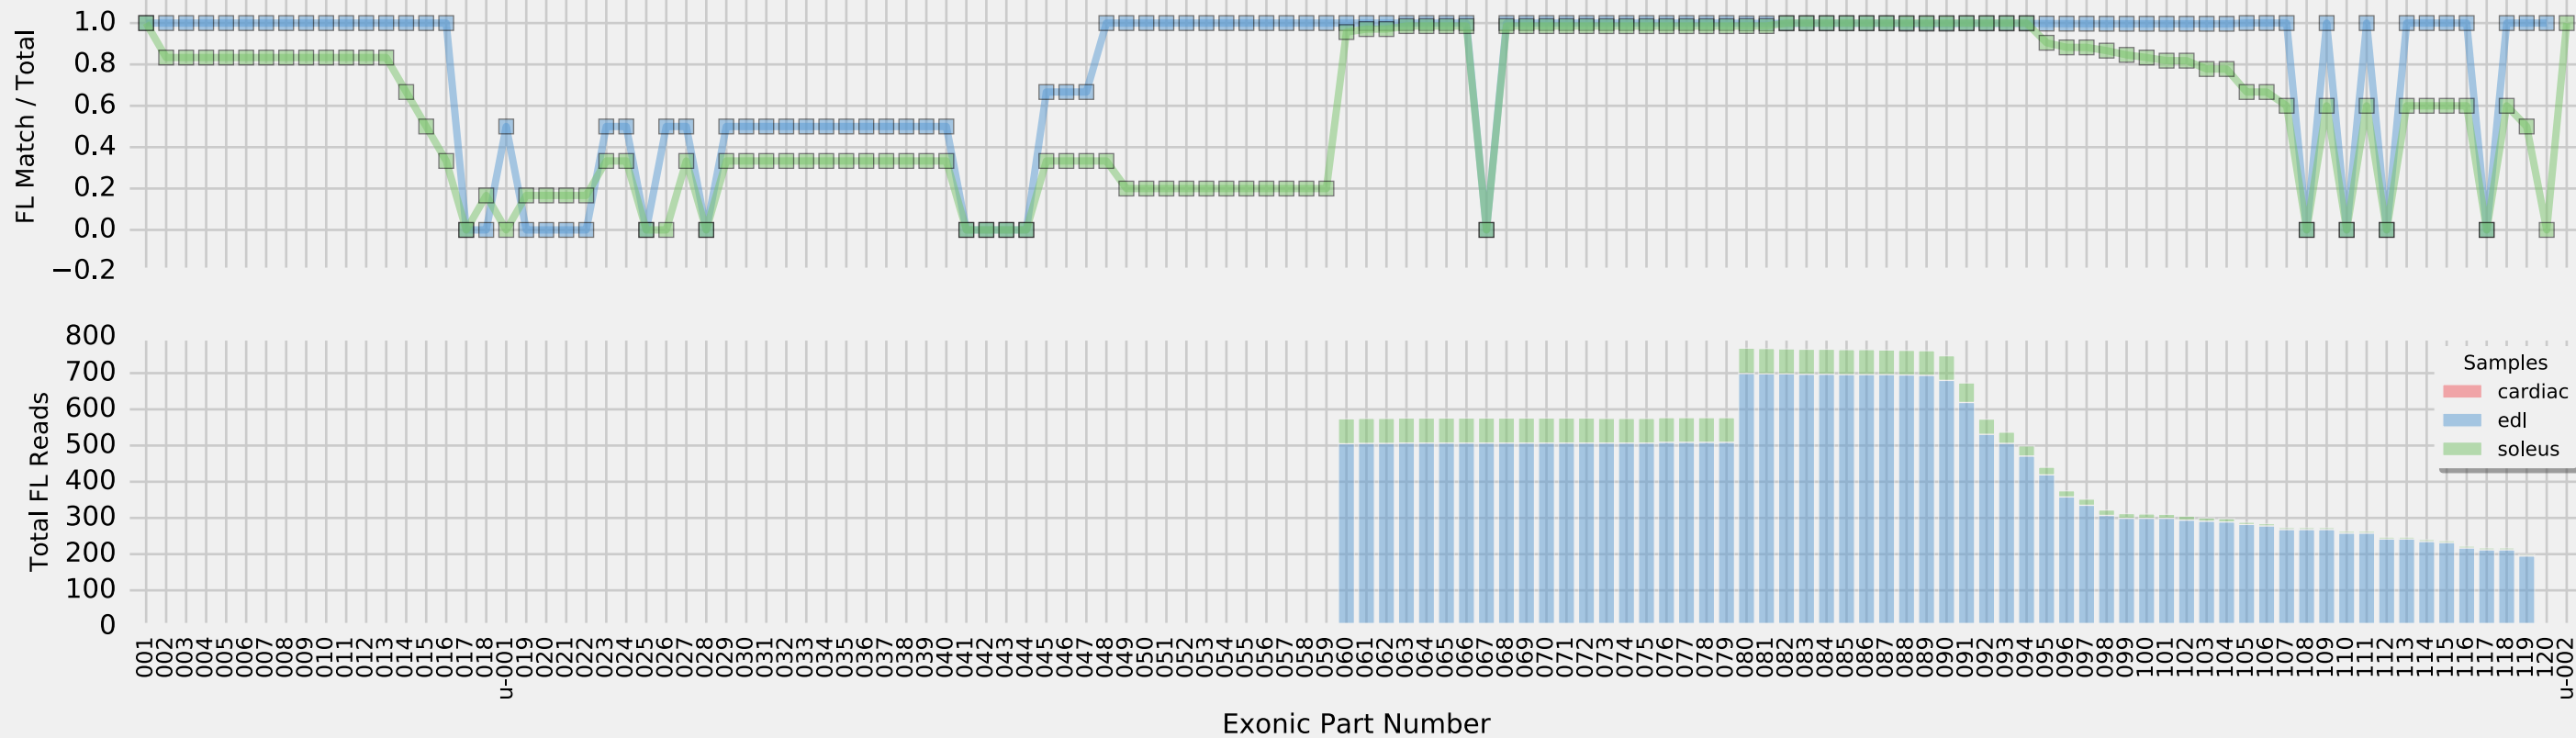

# Ryr2

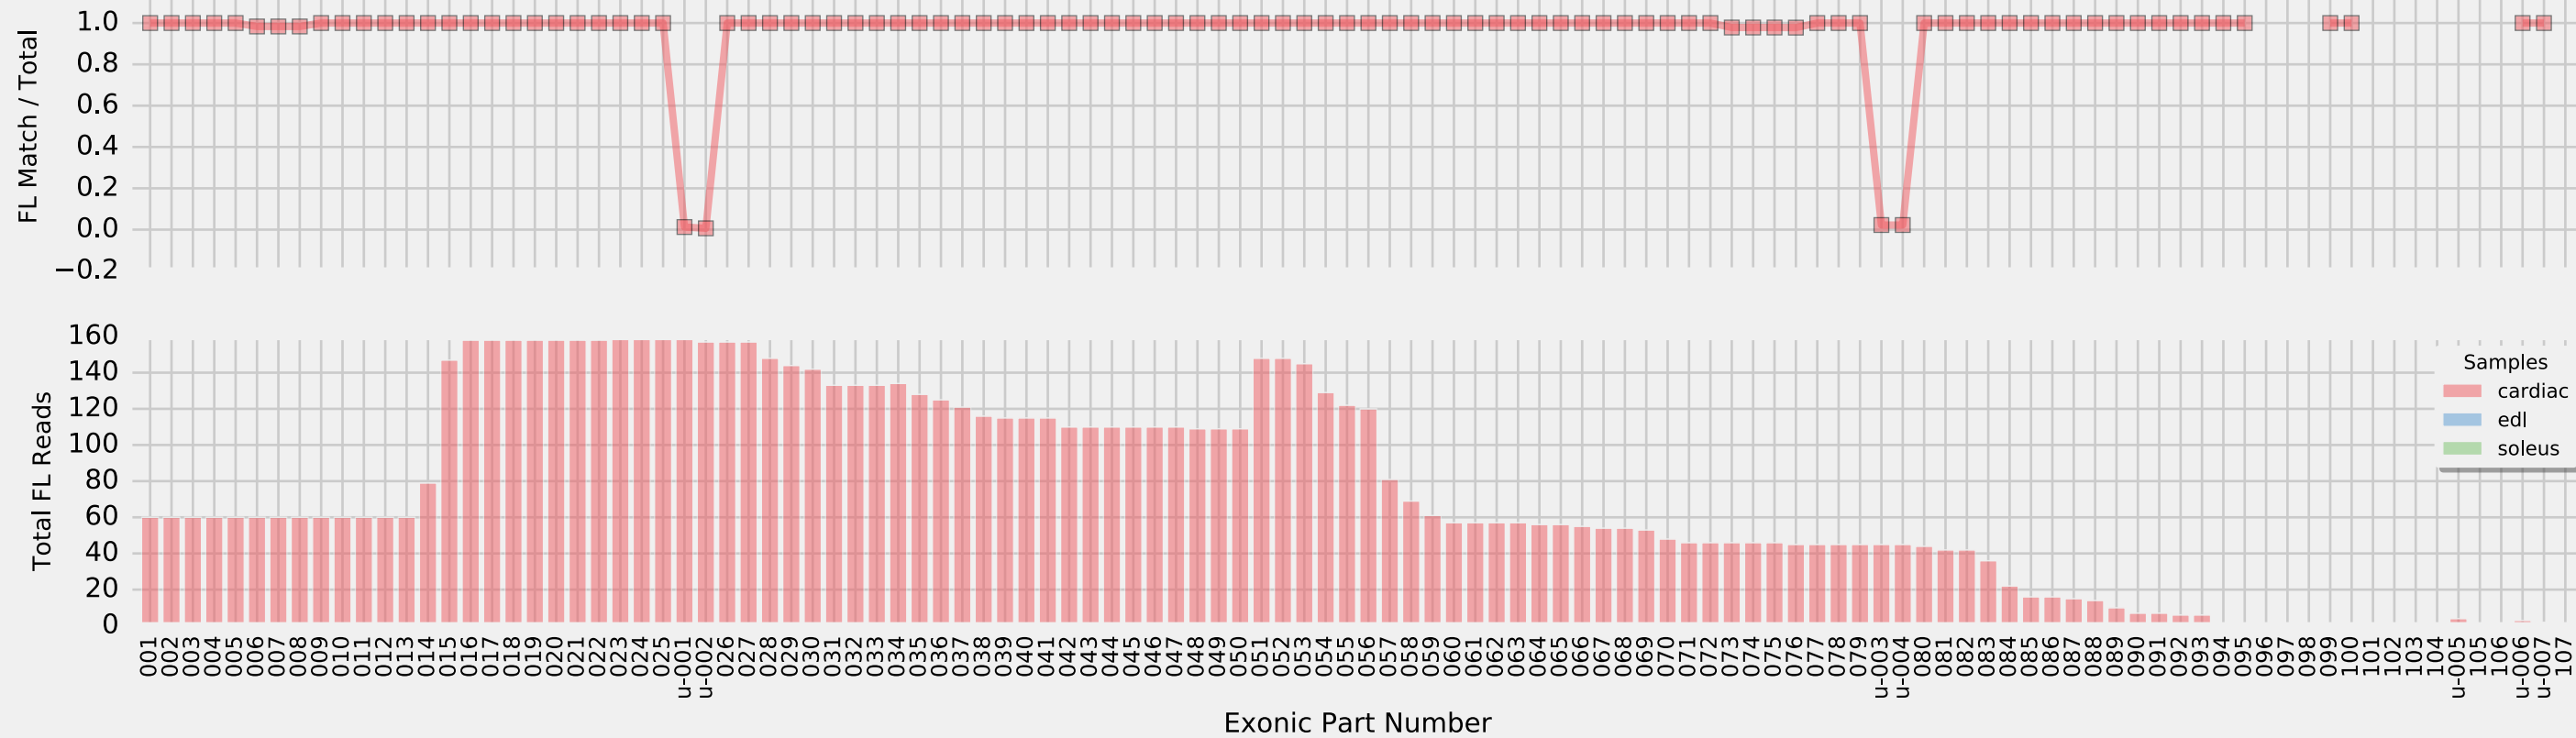

# Samd4

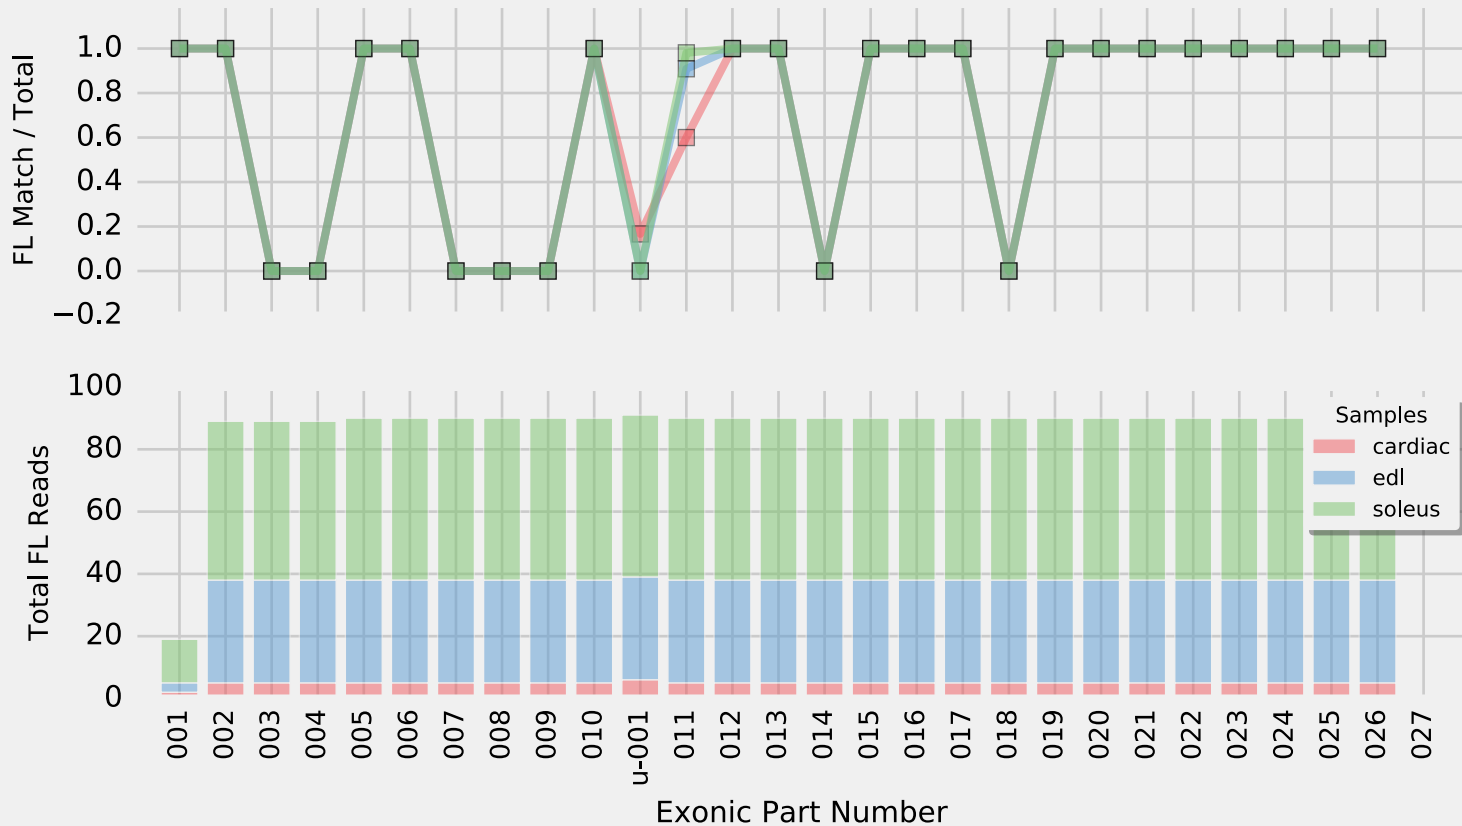

# Sbf1

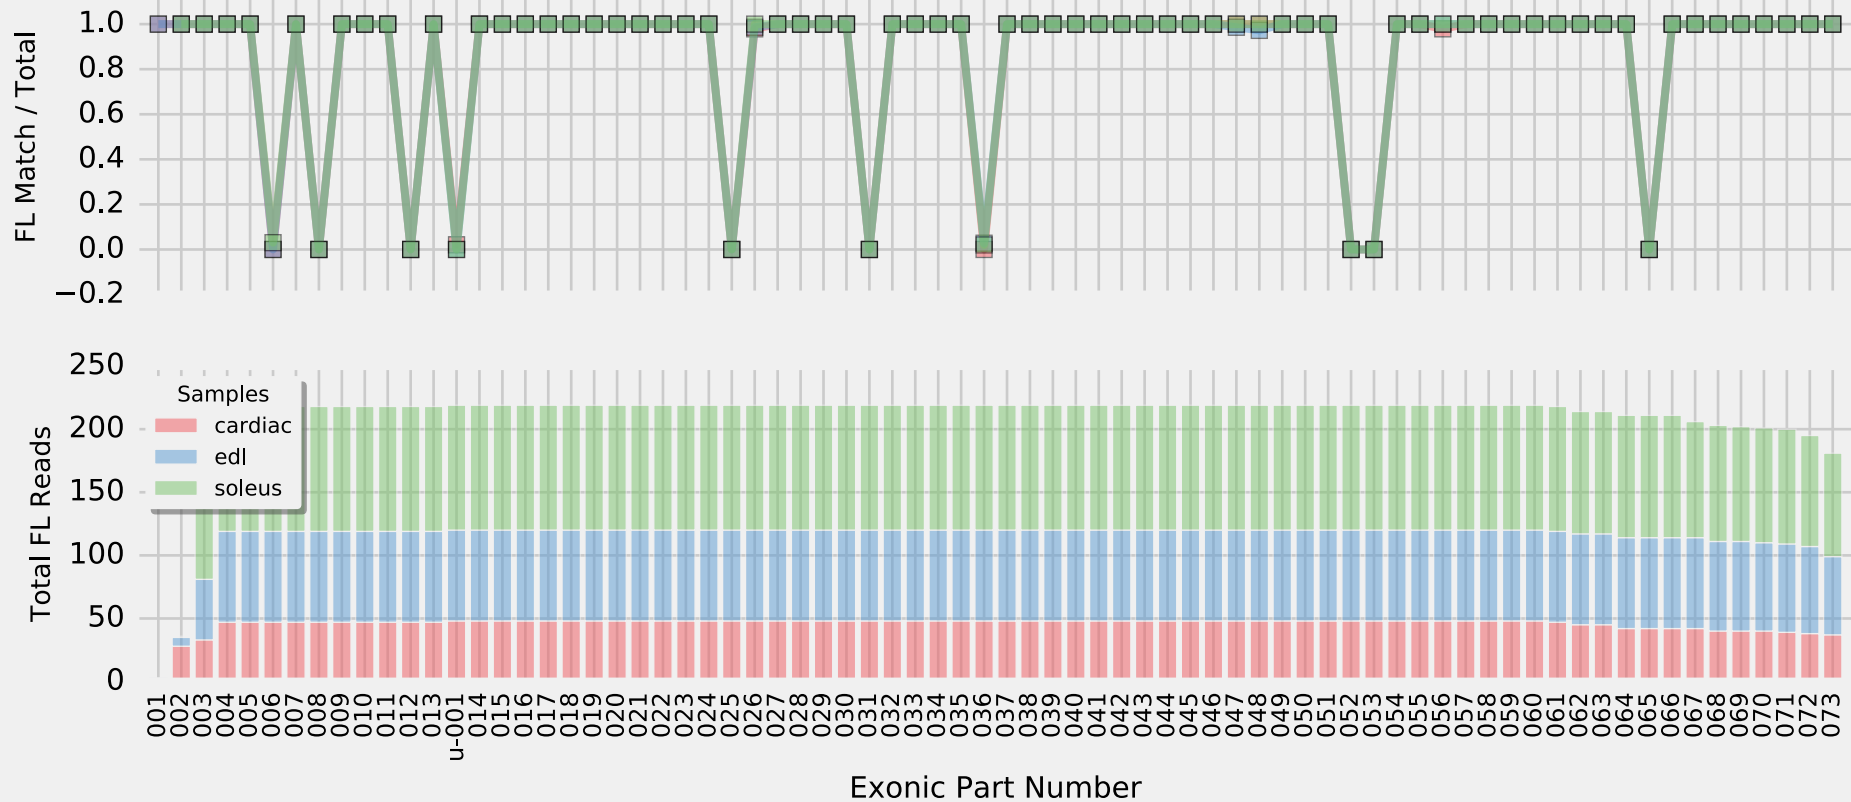

# Sbno1

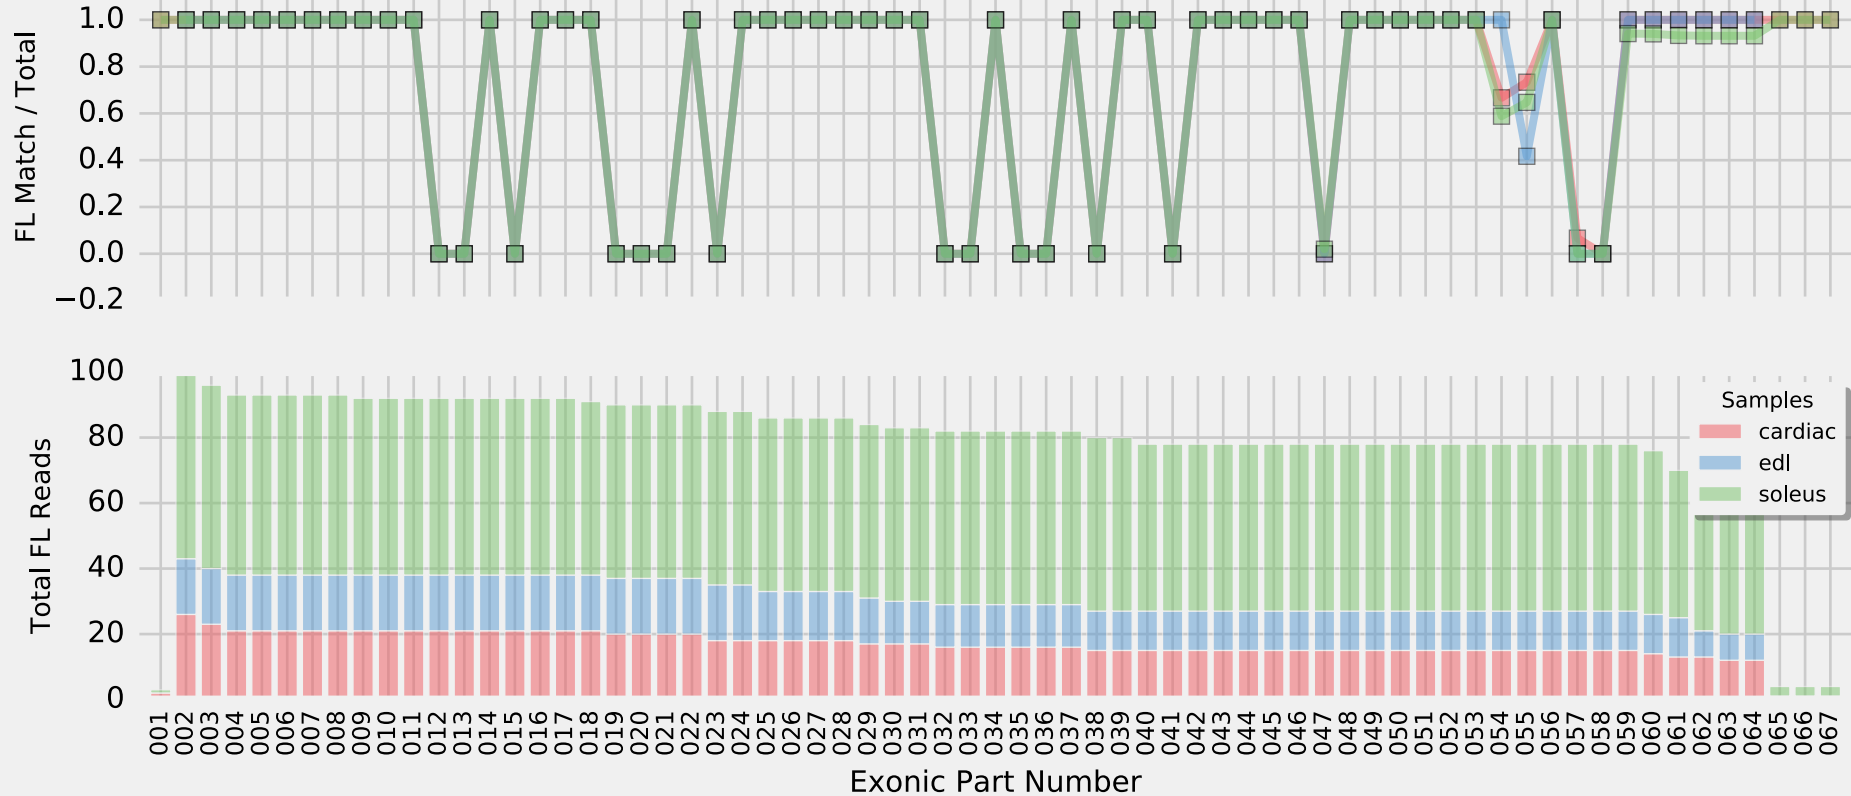

# Scaf11

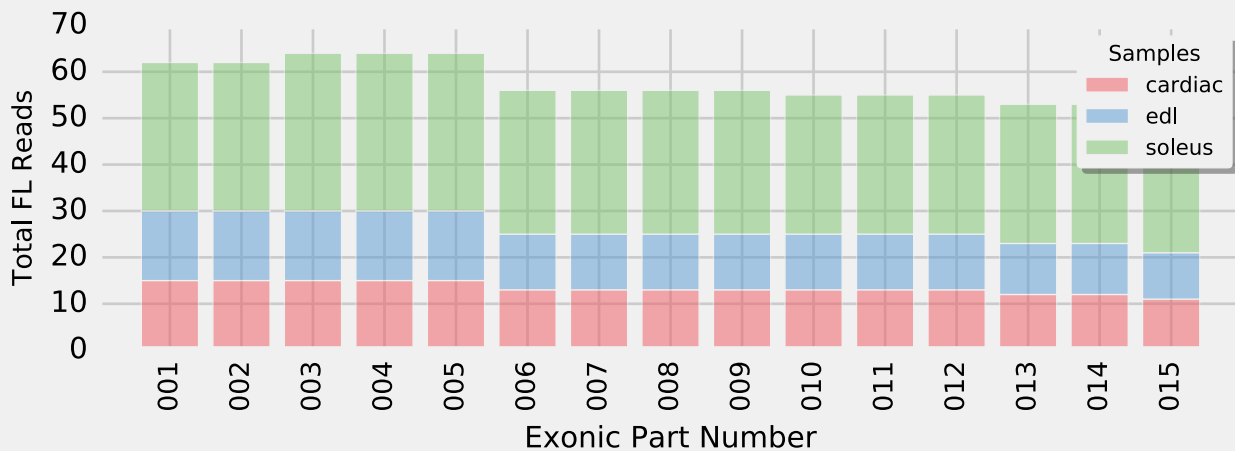



# Scn4a

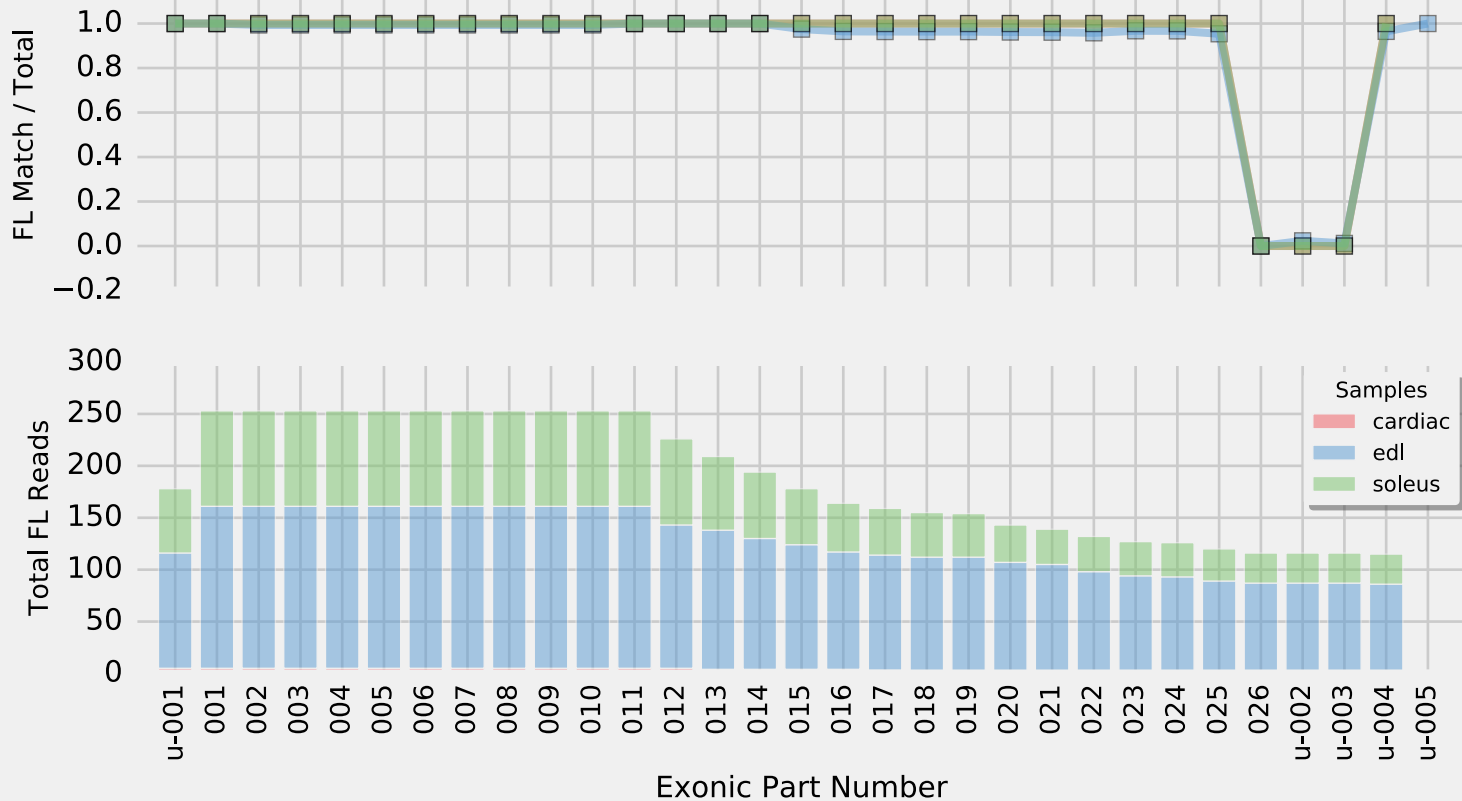

# Scn5a

FL Match / Total

1.0  
0.8  
0.6  
0.4  
0.2  
0.0  
-0.2

Total FL Reads

60  
50  
40  
30  
20  
10  
0

Samples

cardiac  
edl  
soleus

Exonic Part Number

001 002 003 004 005 006 007 008 009 010 011 012 013 014 015 016 017 018 019 020 021 022 023 024 025 026 027 028 029 030 031 032 033 034

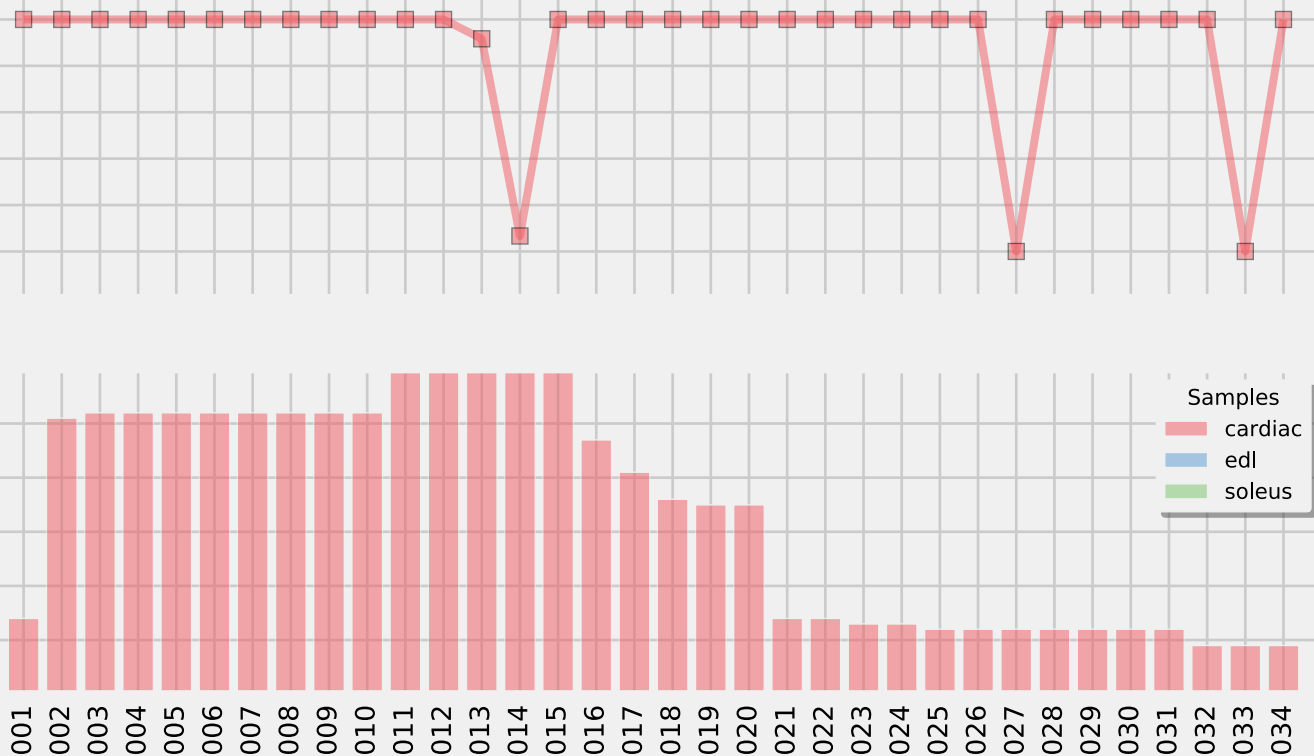

# Sec14I5

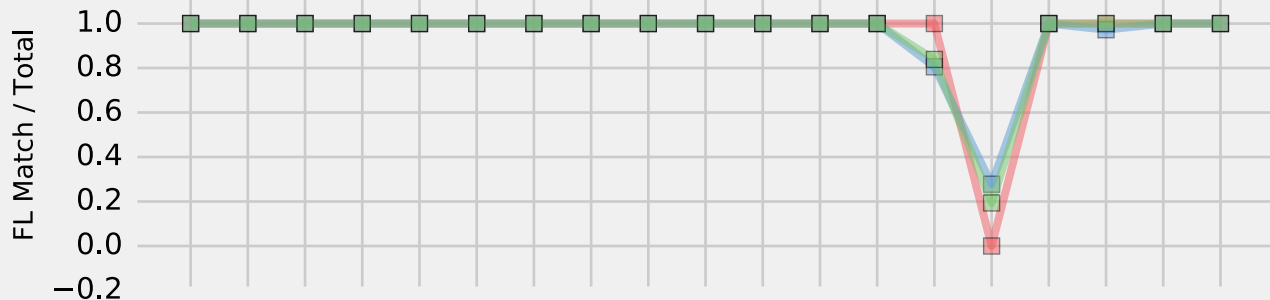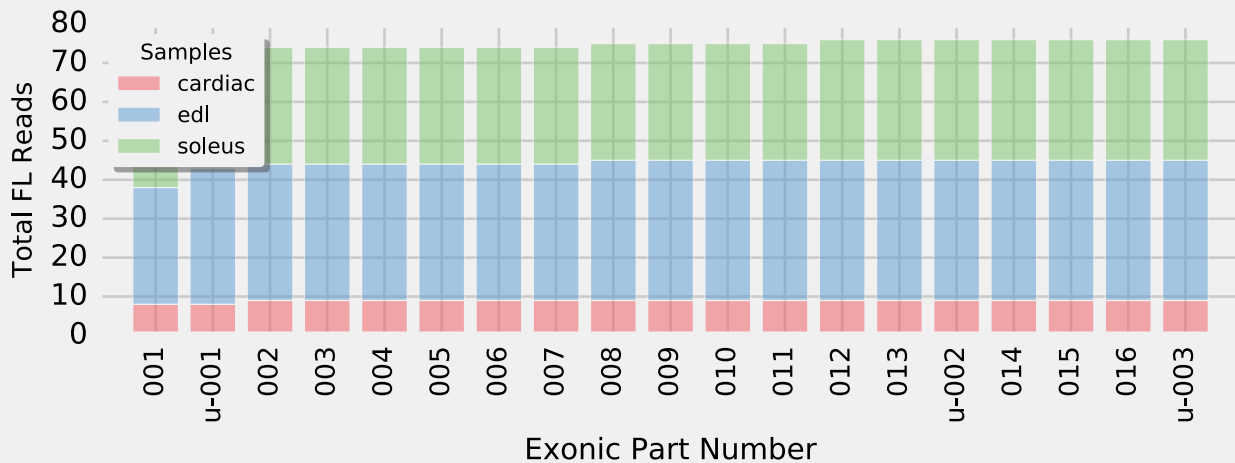

# Sec16a

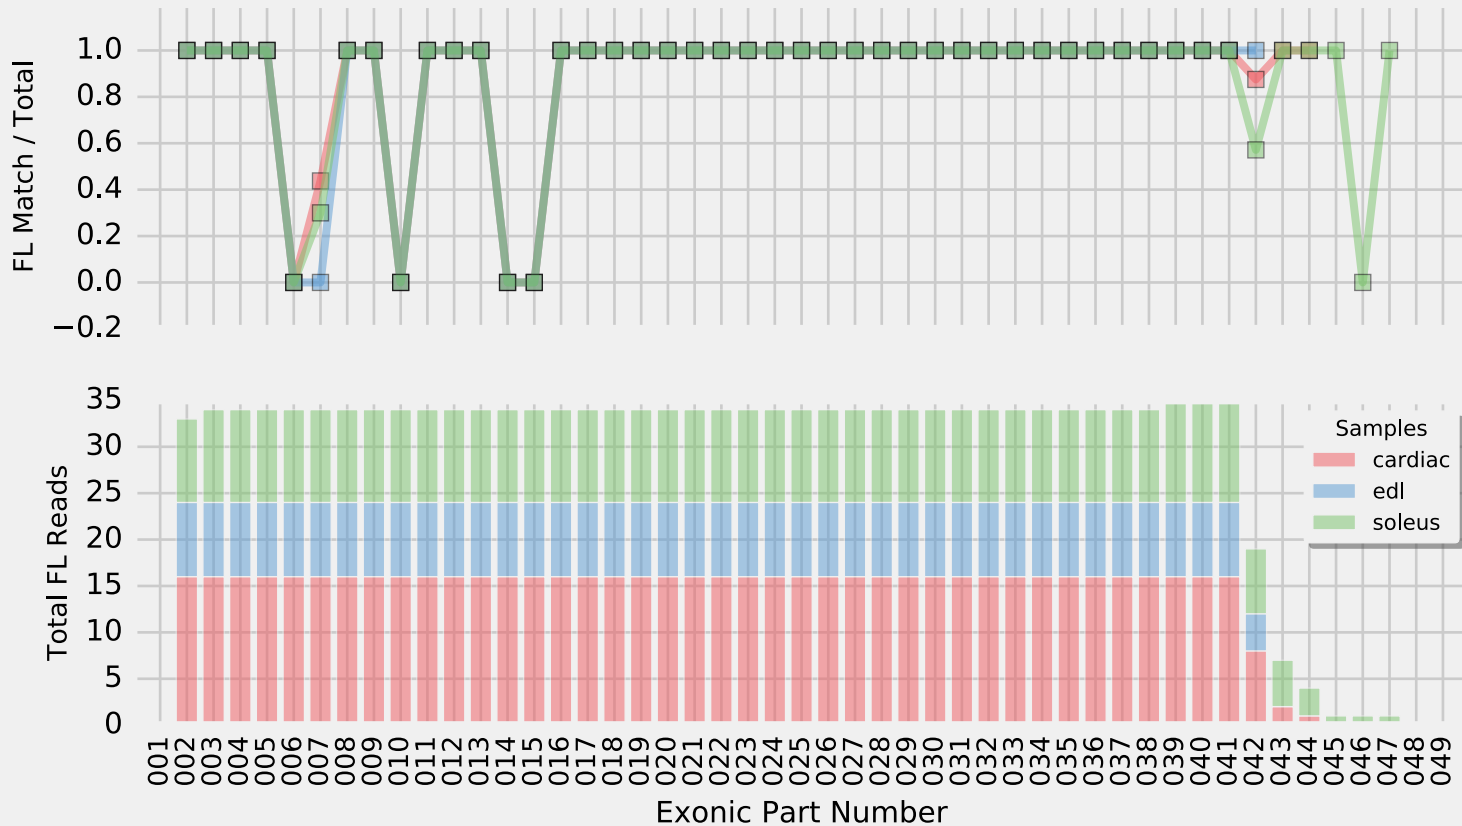

# Secisbp2l

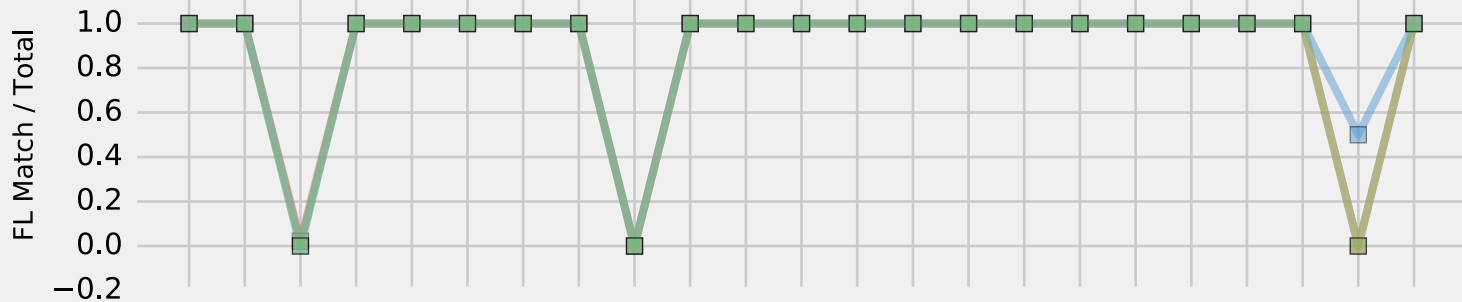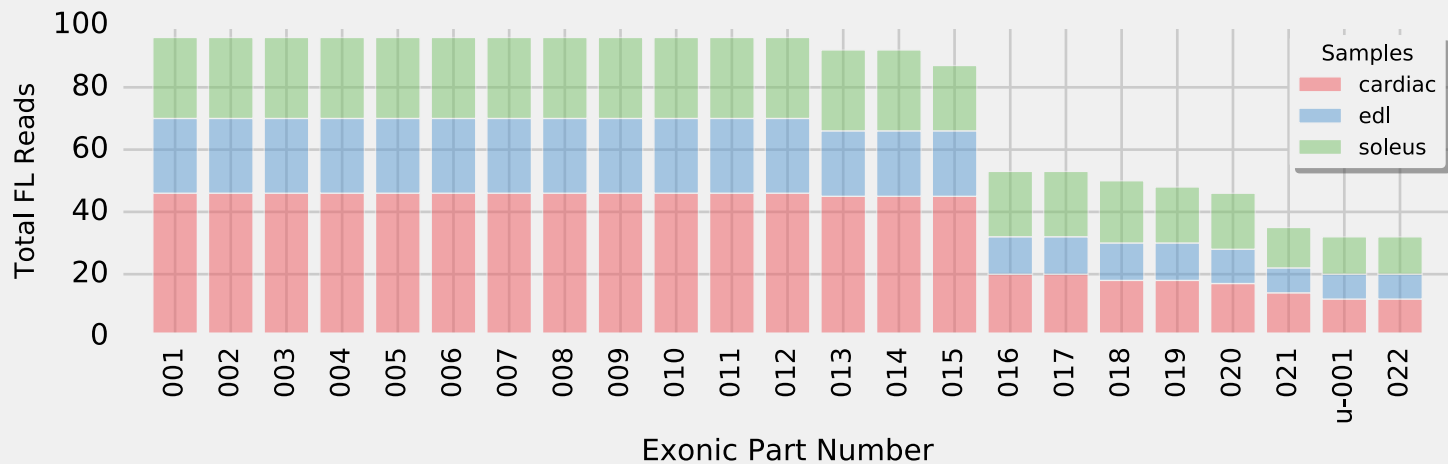

# Sel1l

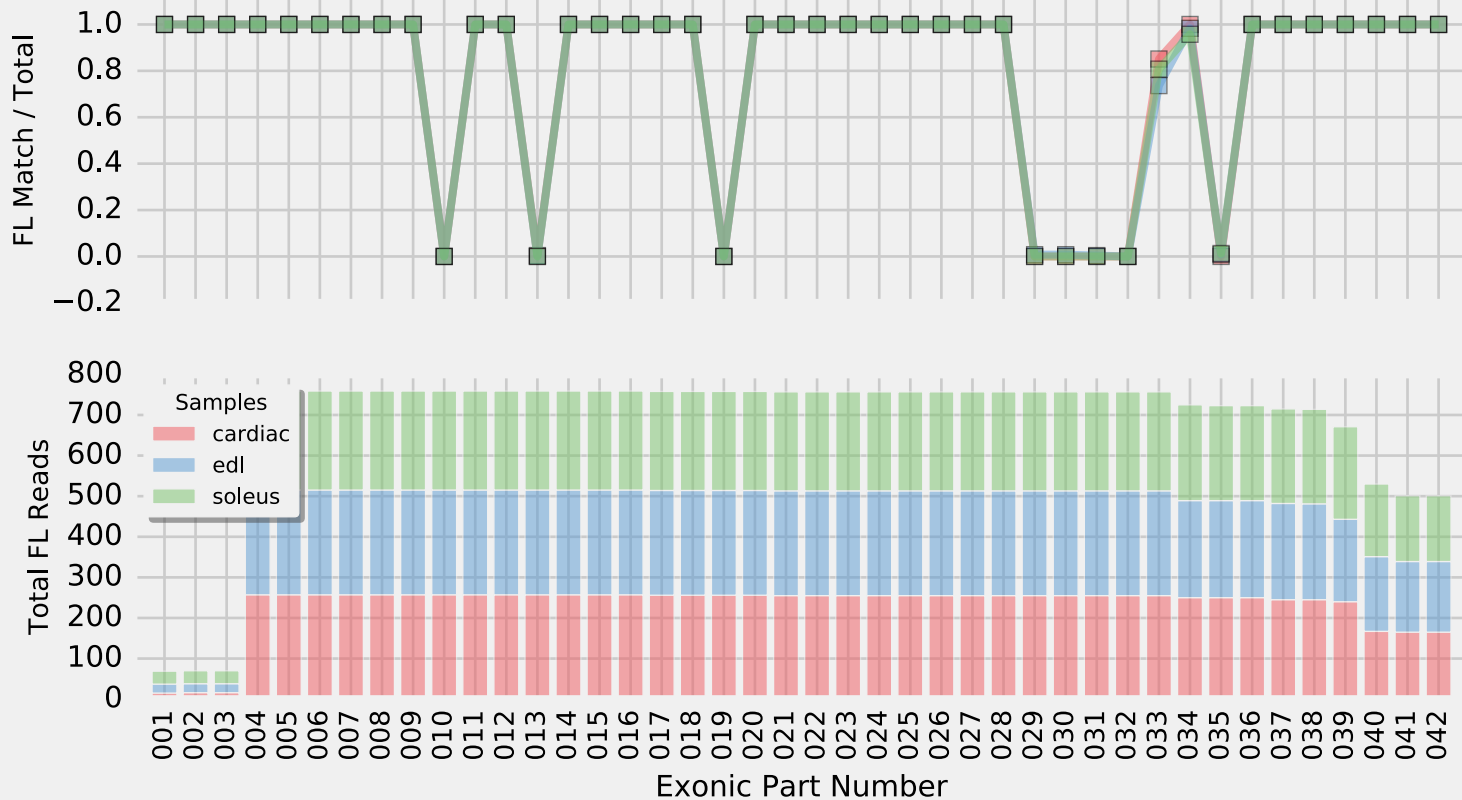

# Sema6d

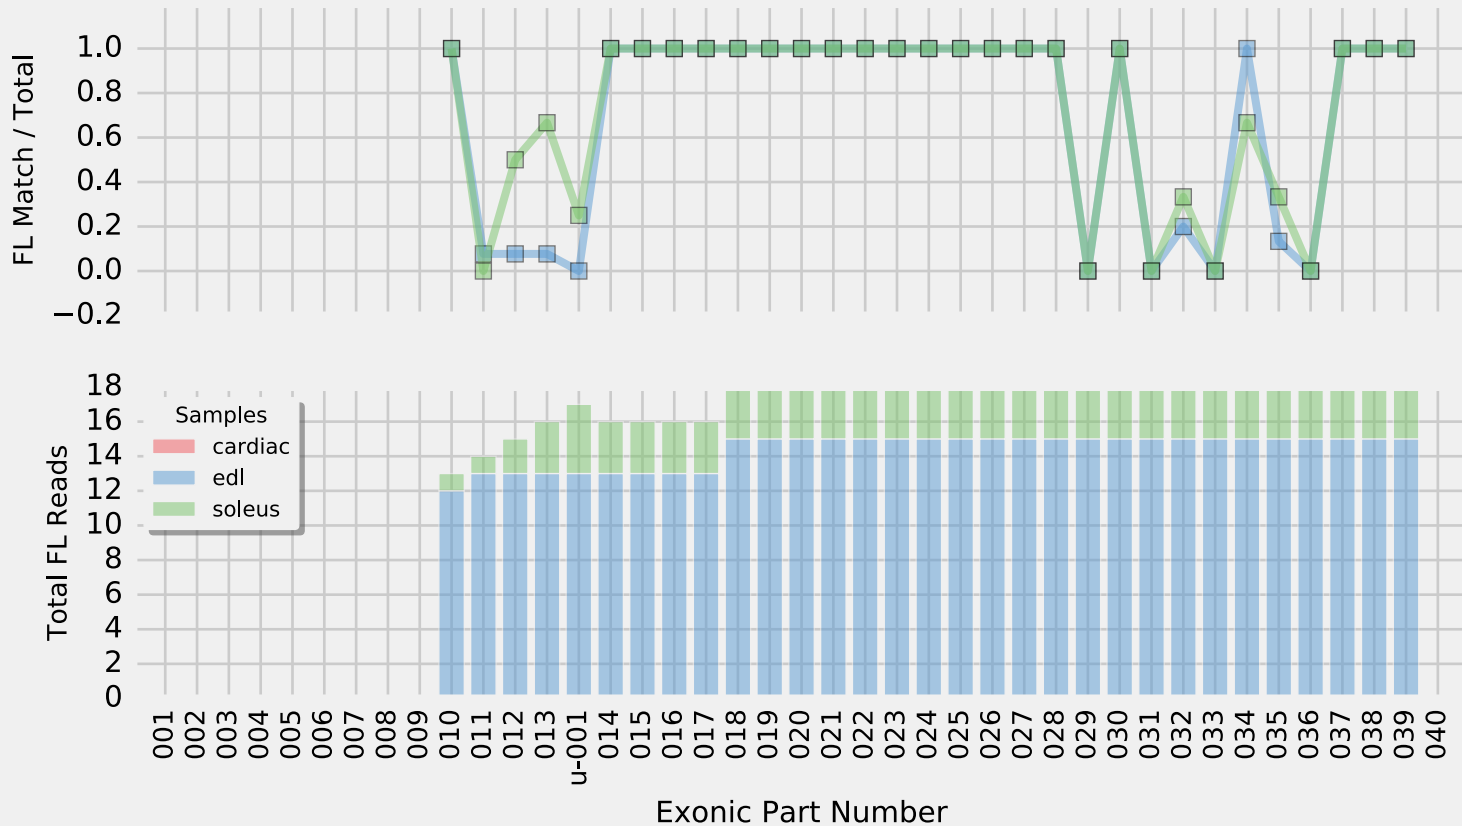

# Senp5

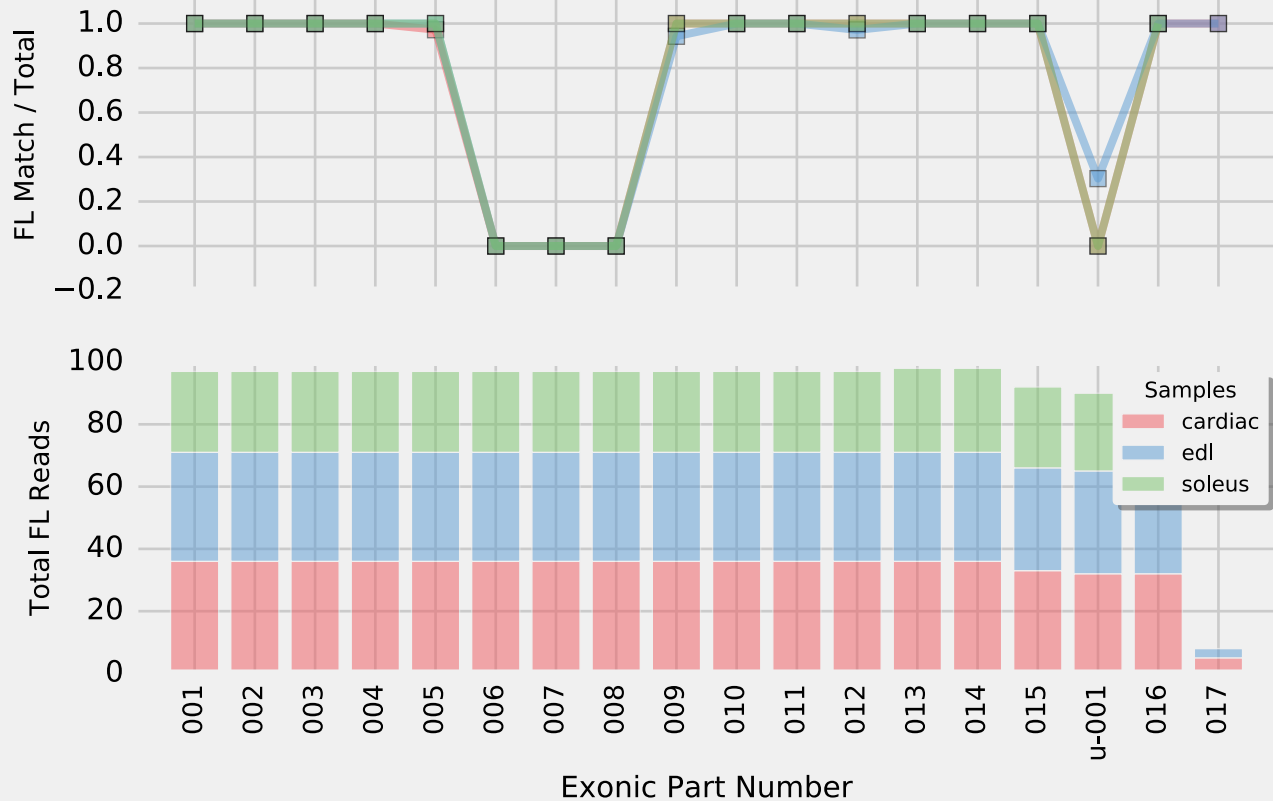



# Serac1

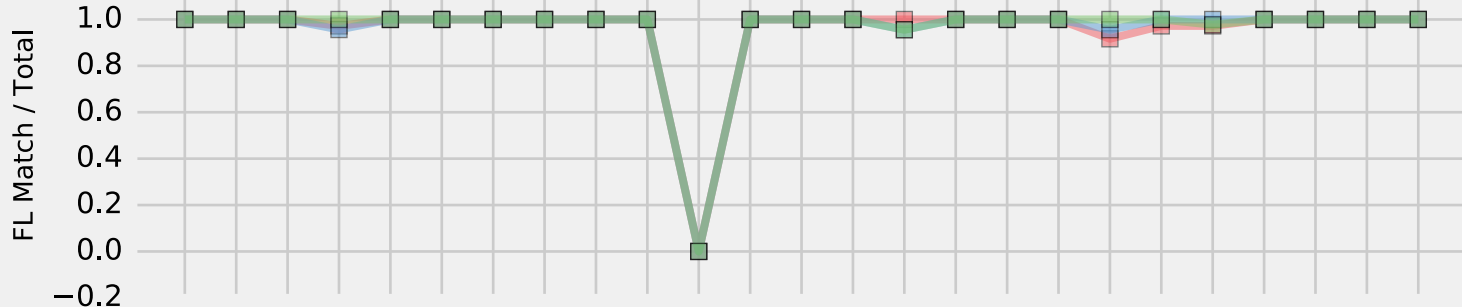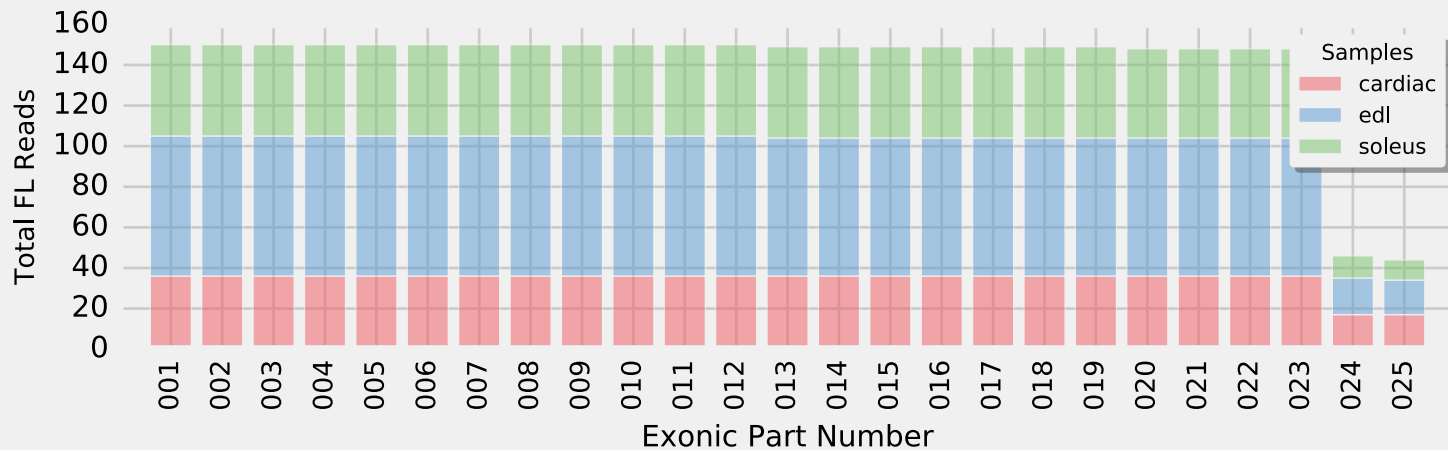

# Setd7

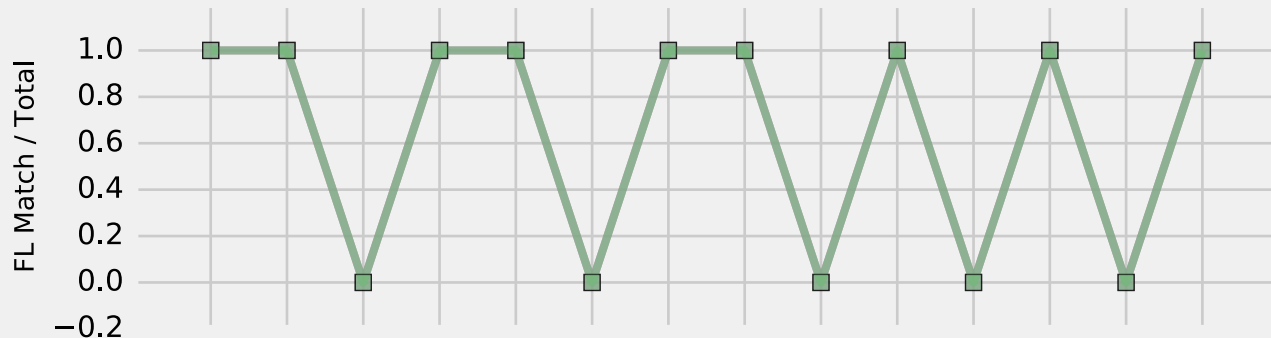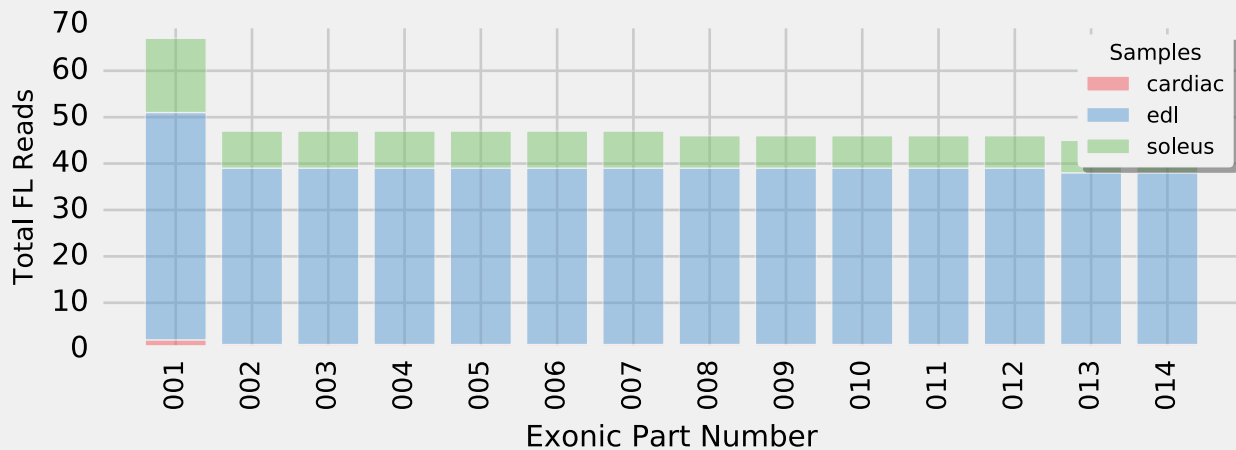

# Sf3b1

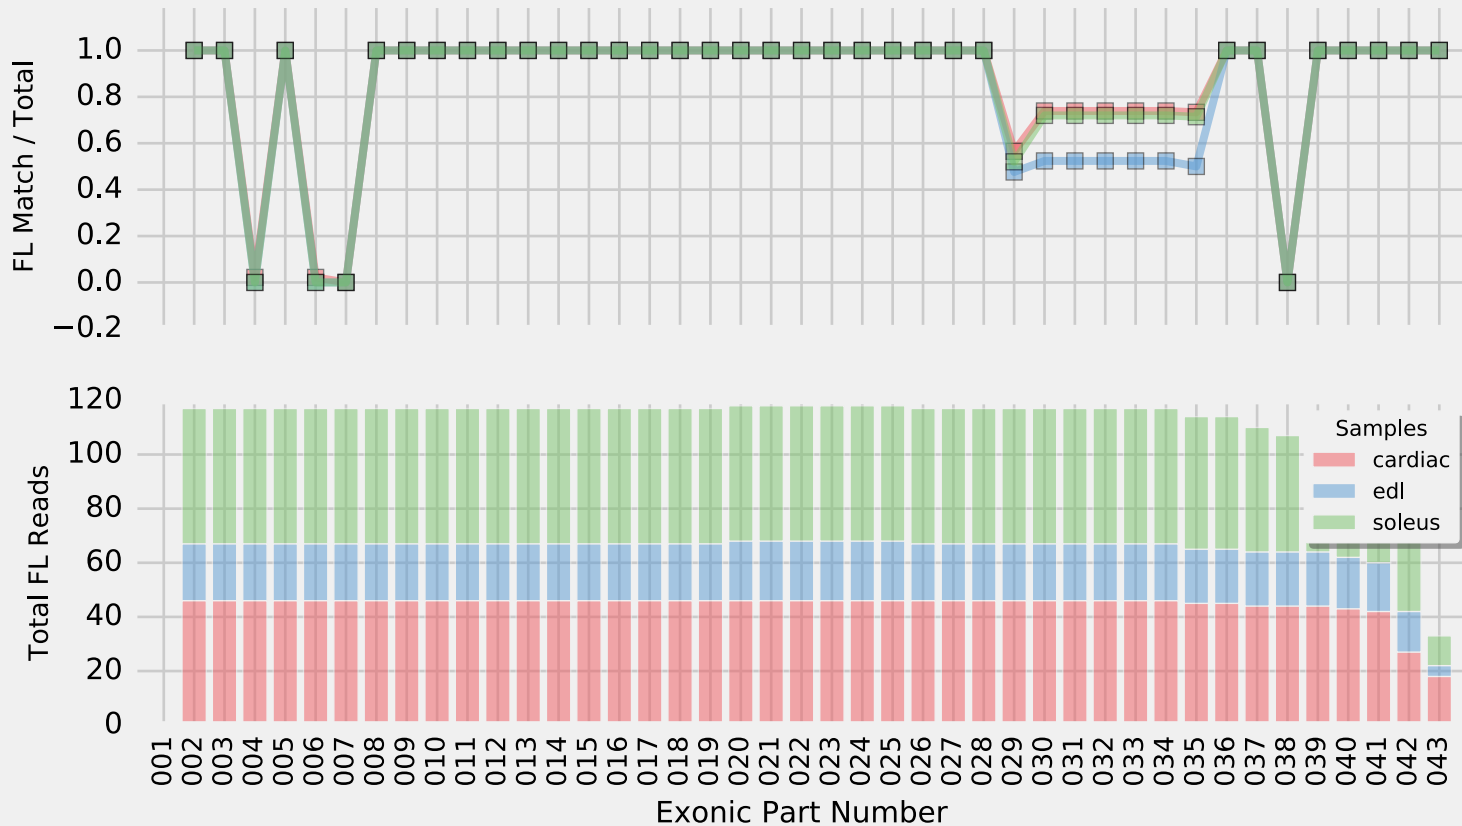

# Sft2d2

FL Match / Total

1.0  
0.8  
0.6  
0.4  
0.2  
0.0  
-0.2

Total FL Reads

250  
200  
150  
100  
50  
0

Samples

cardiac  
edl  
soleus

Exonic Part Number

001

002

003

004

005

006

007

008

009

010

011

012

013

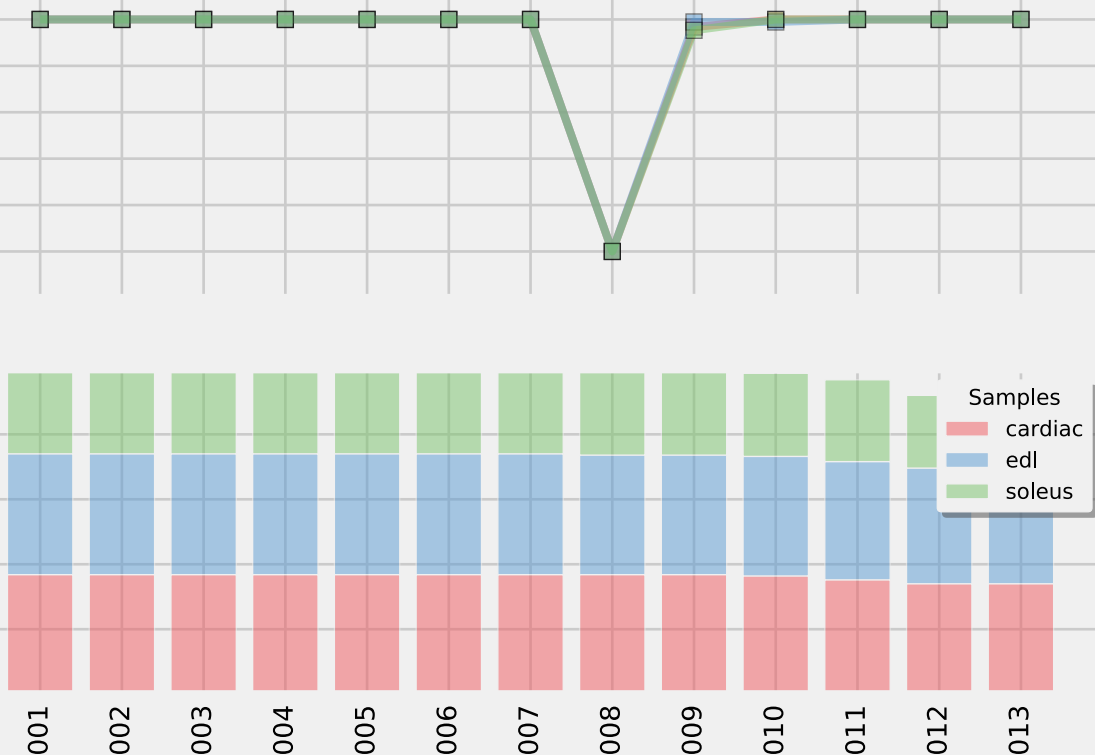

# Sgcd

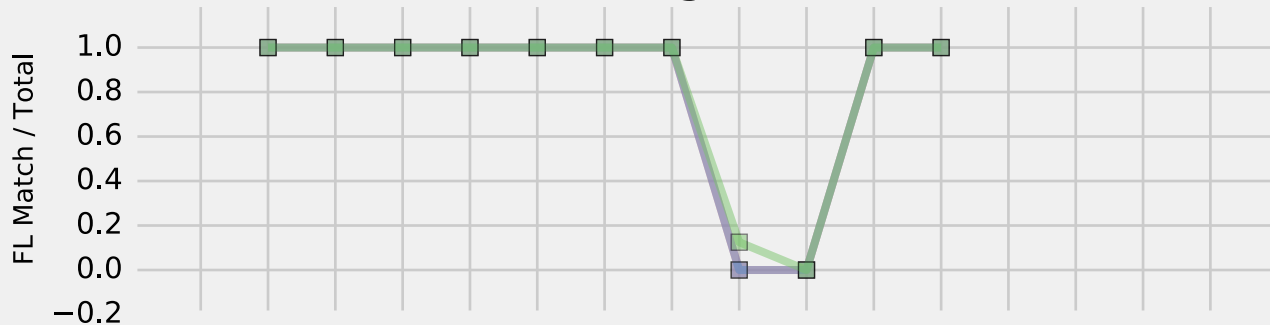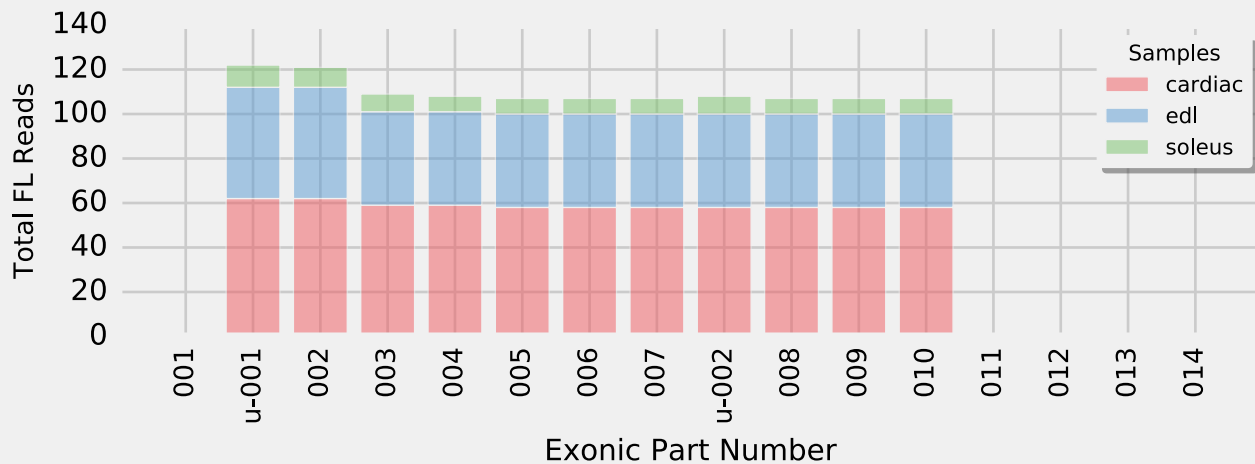

# Six4

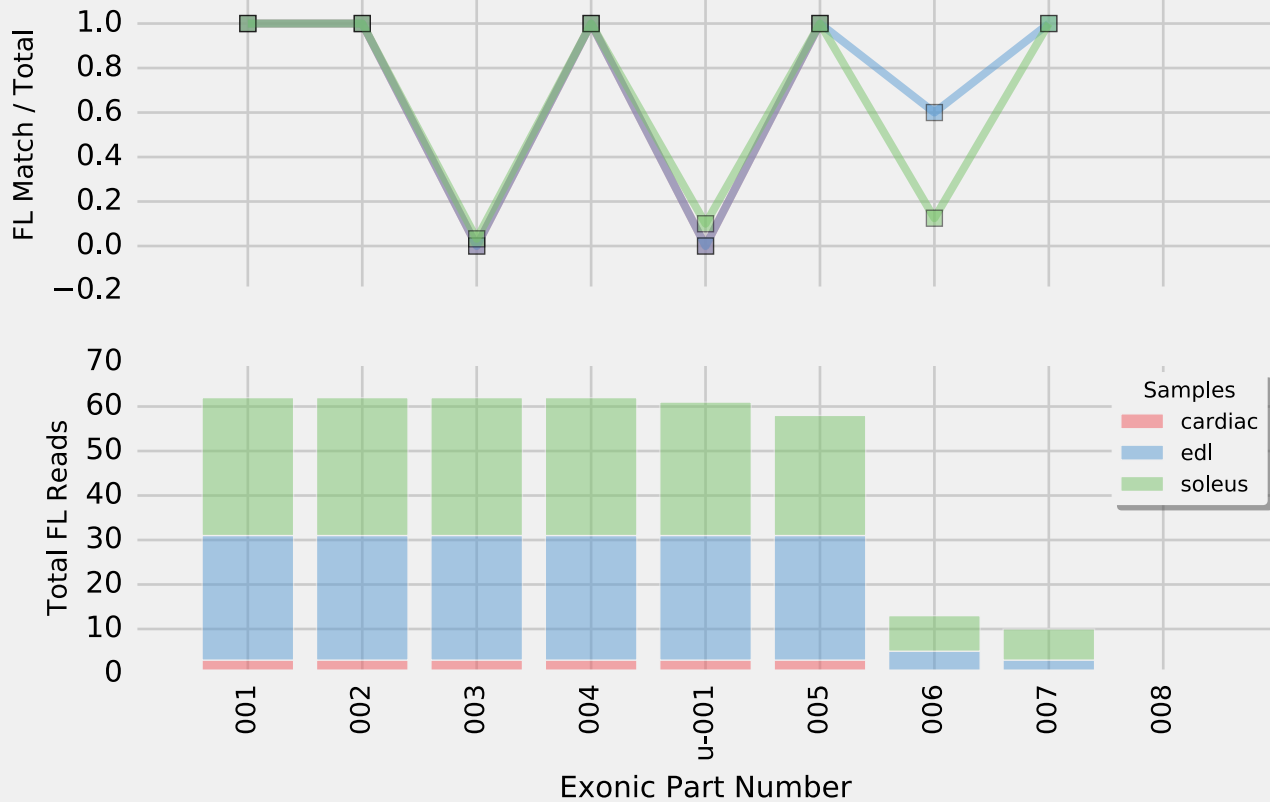

# Skil

FL Match / Total

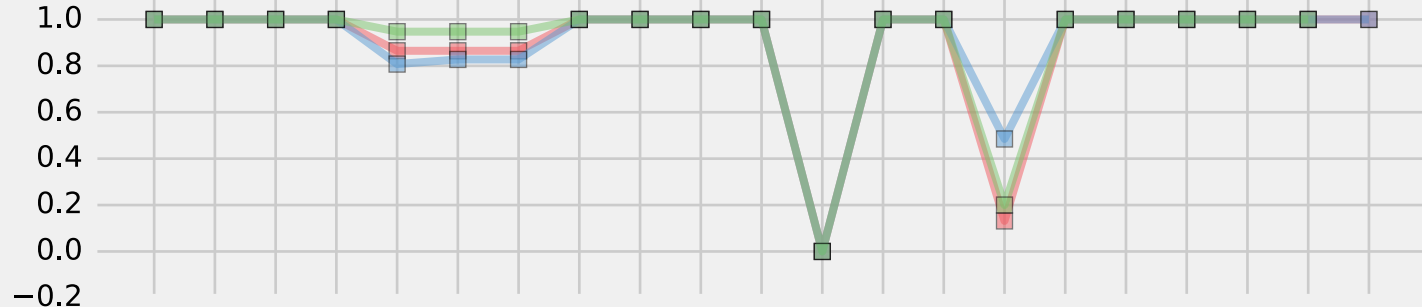

Total FL Reads

Samples  
cardiac  
edl  
soleus

Exonic Part Number

001 002 003 004 005 006 007 008 009 010 011 012 013 014 015 016 017 018 019 020 021

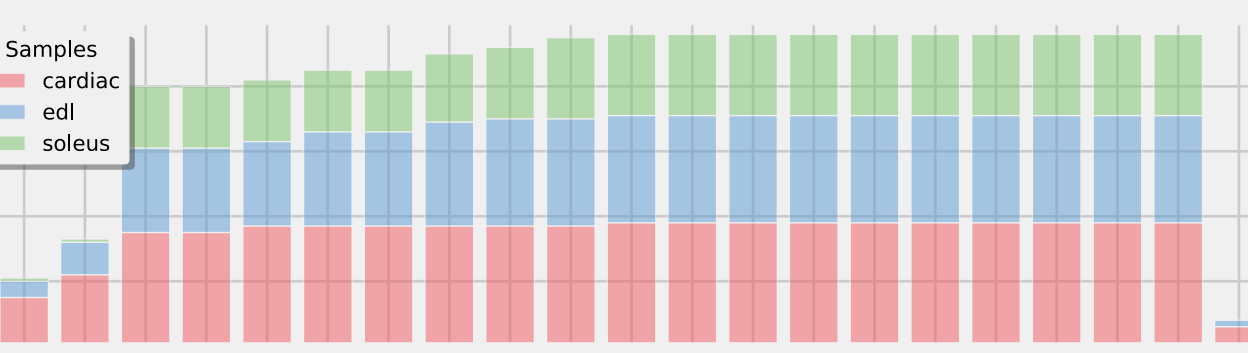

# Slc12a2

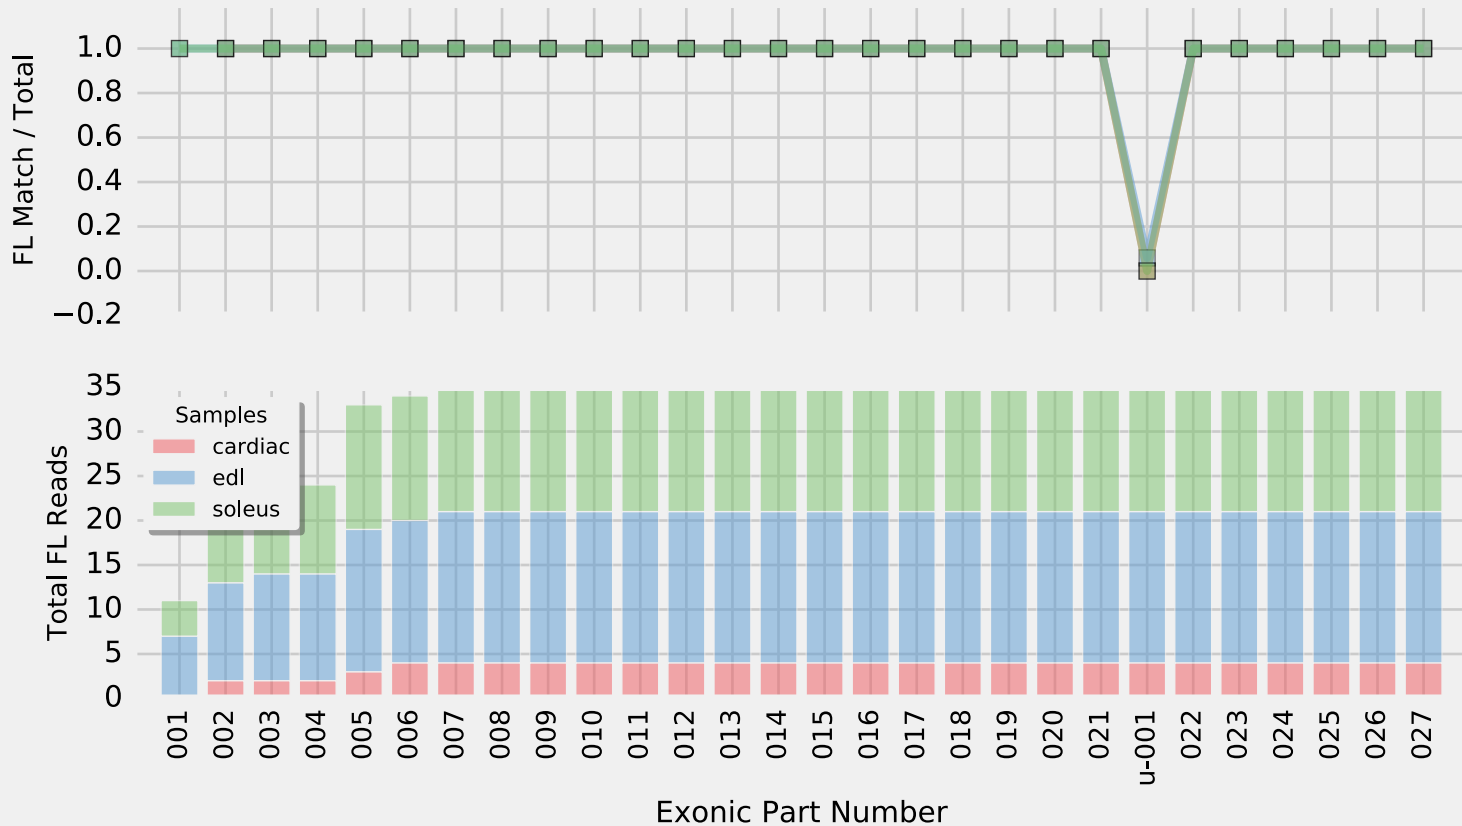



# Slc12a7

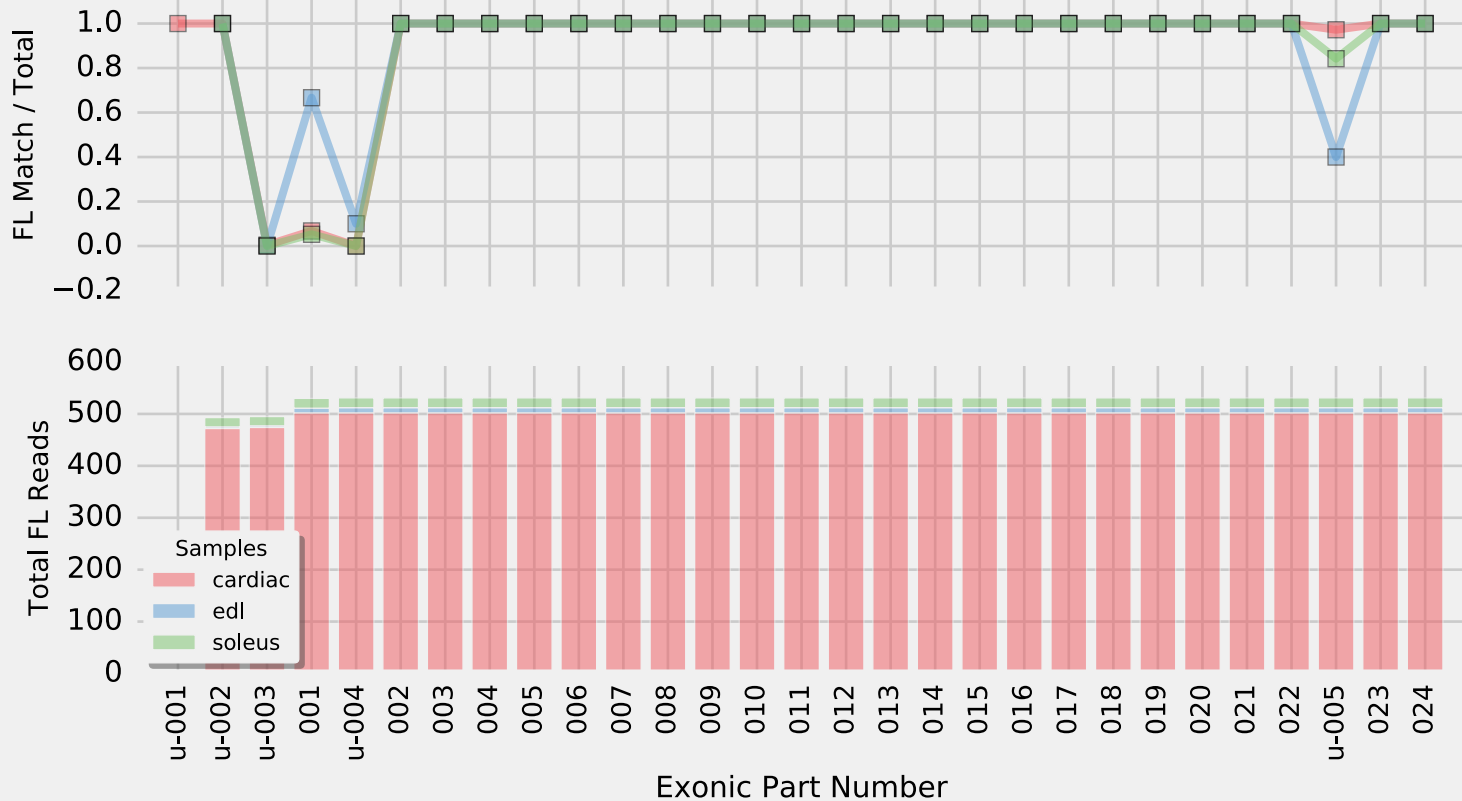

# Slc16a10

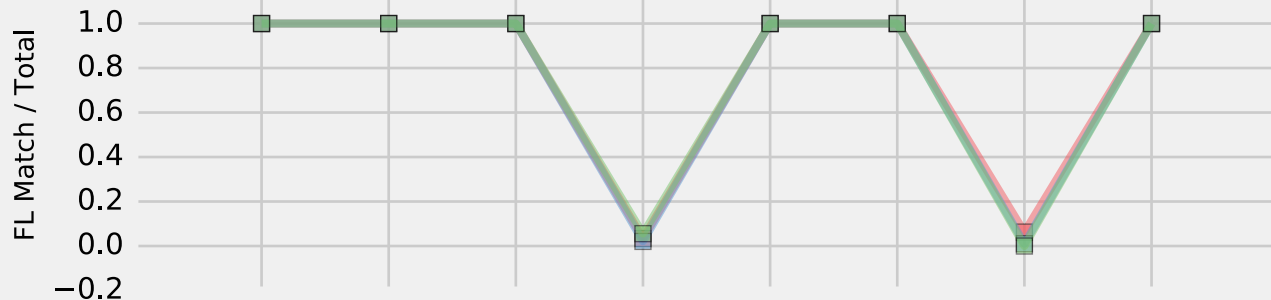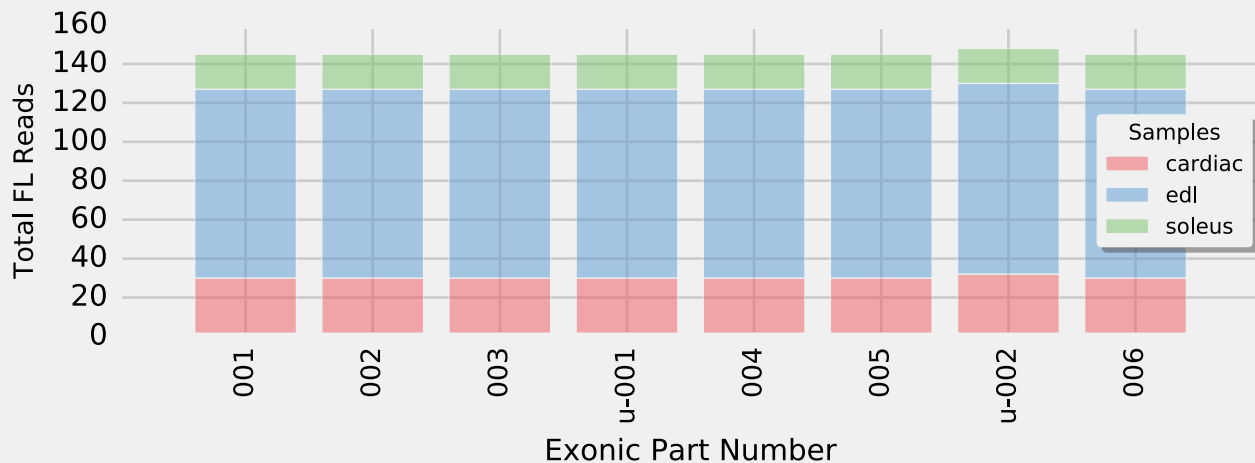

# Slc23a2

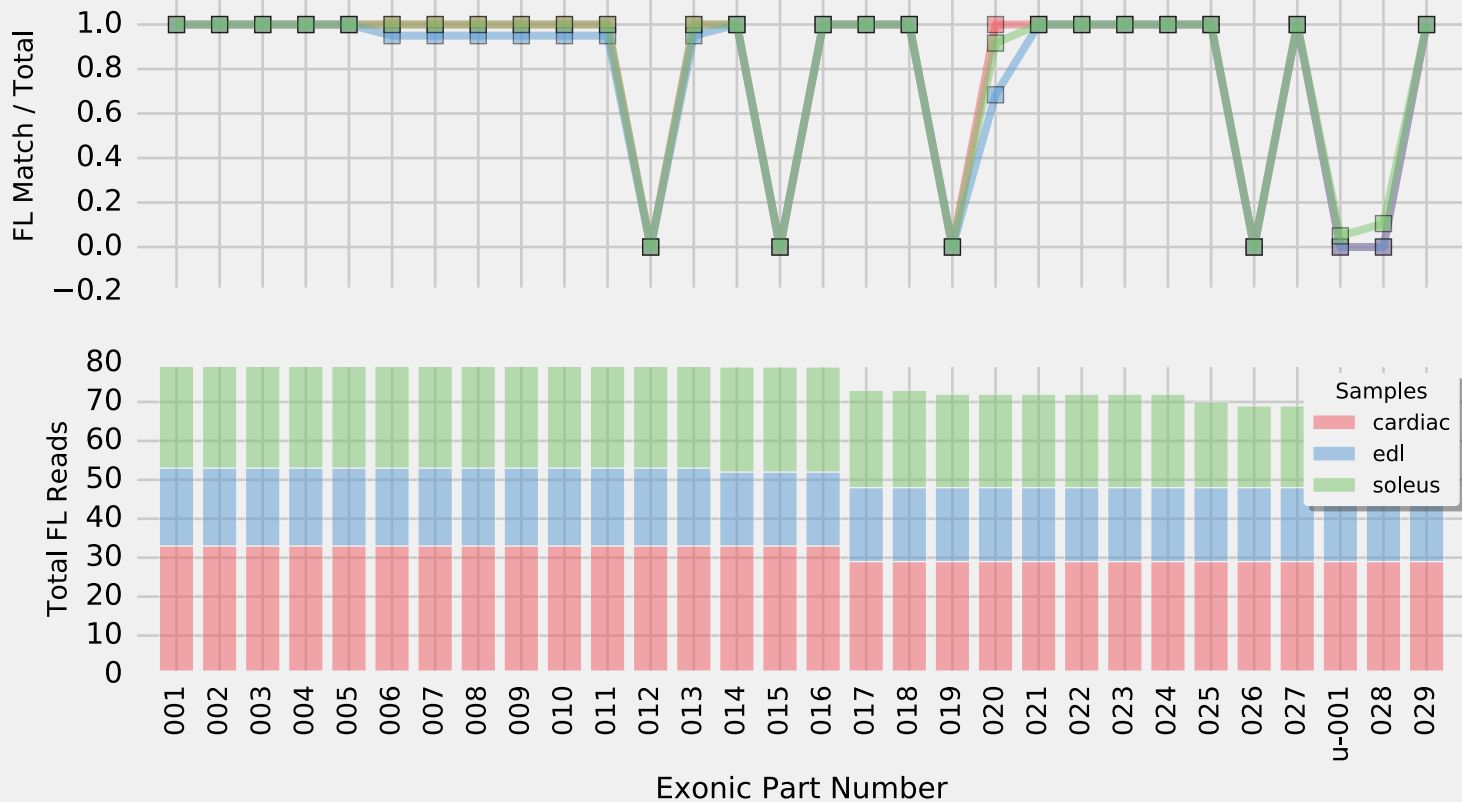

# Slc25a12

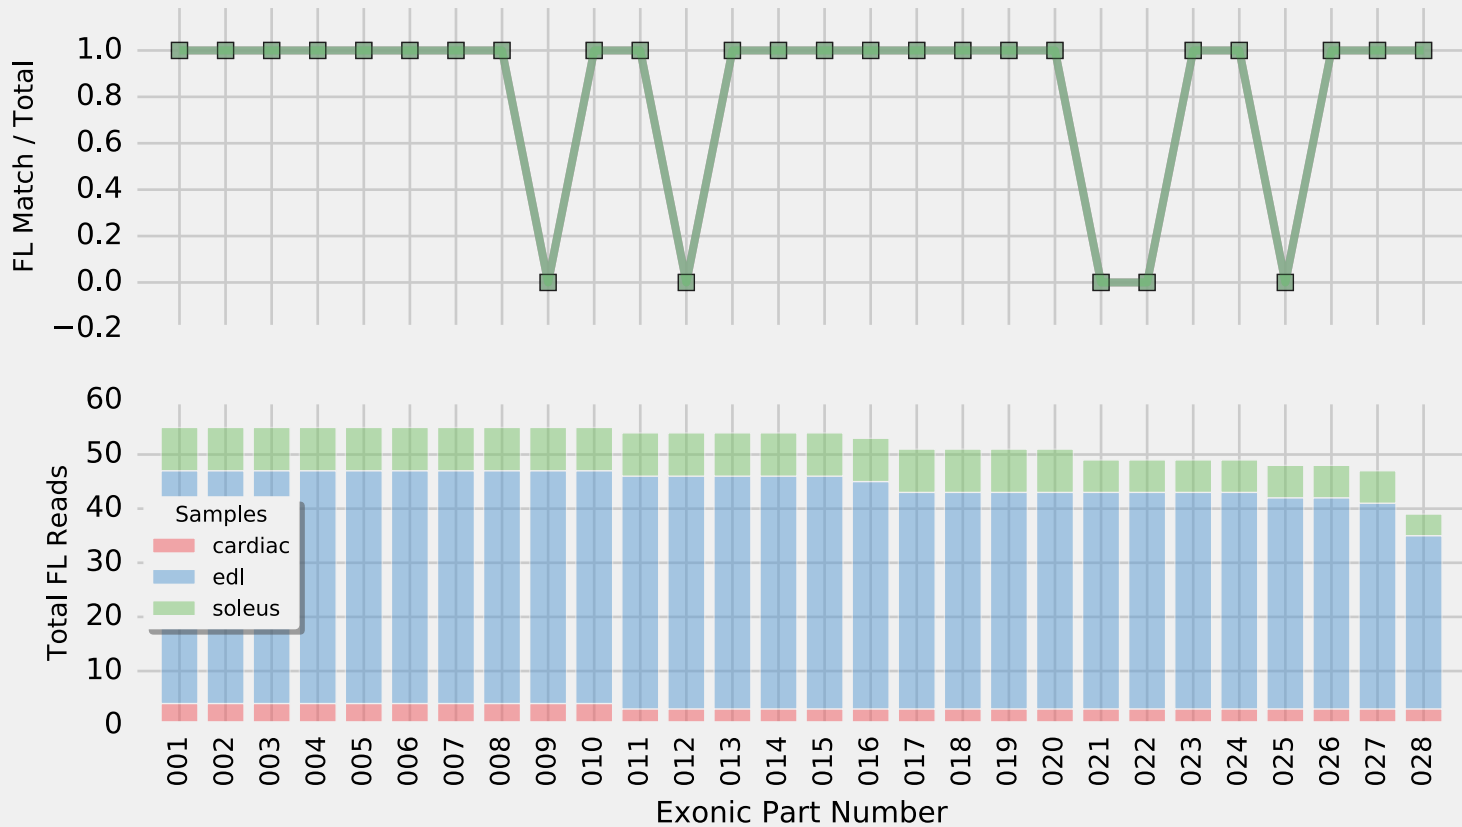

# Slc4a3

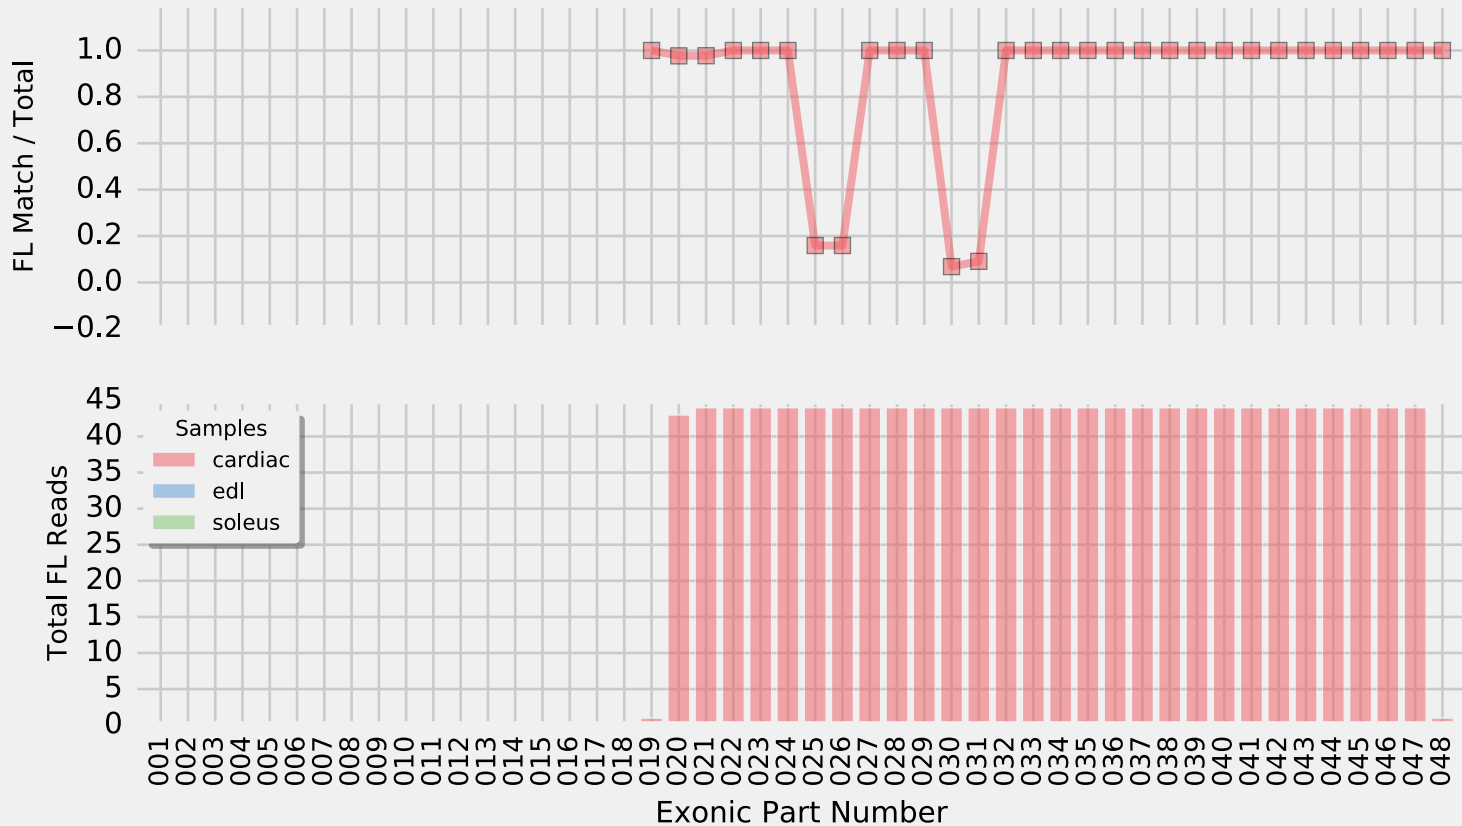

# Slc6a6

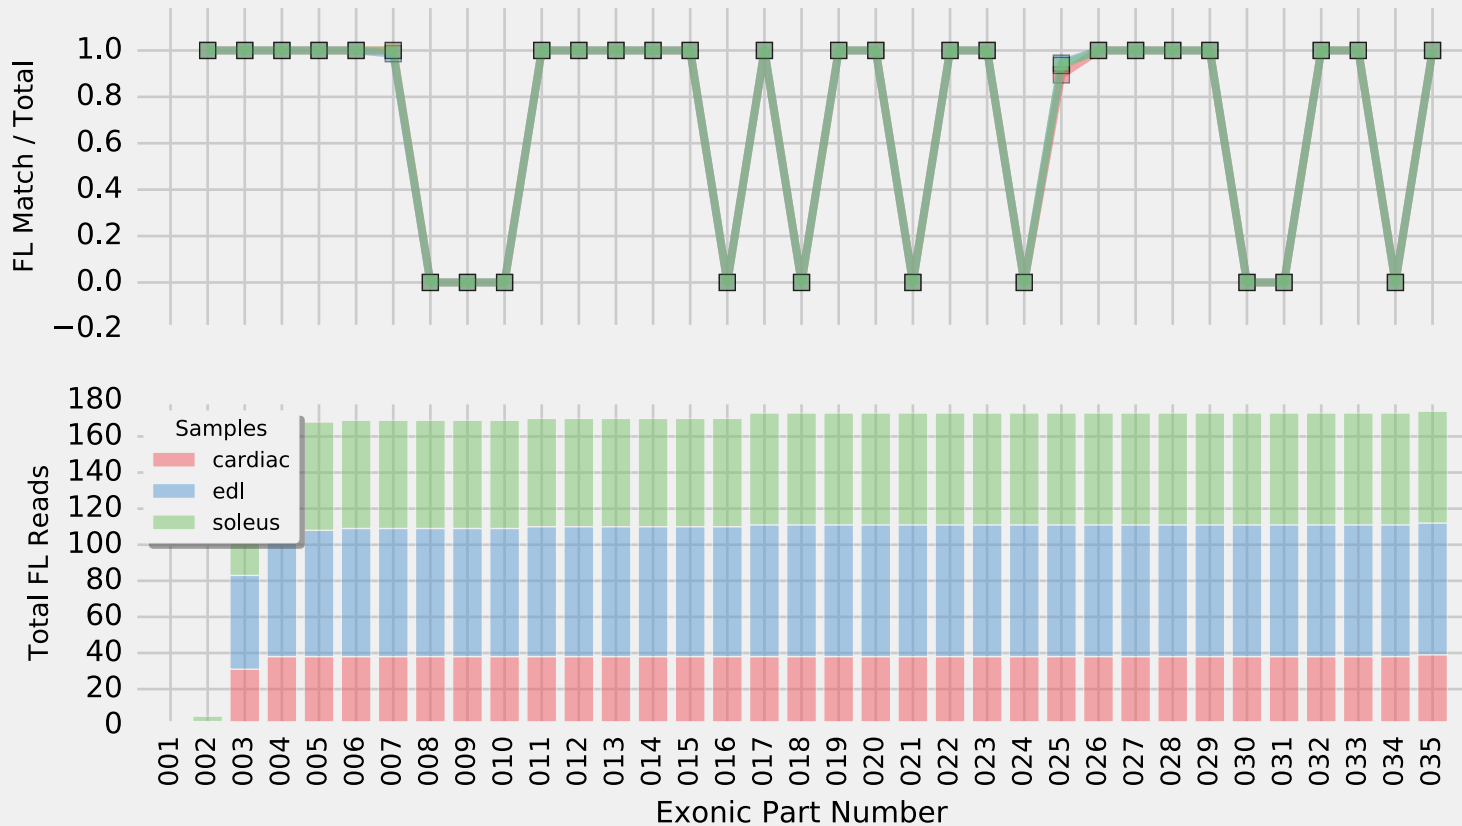

# Slc8a1

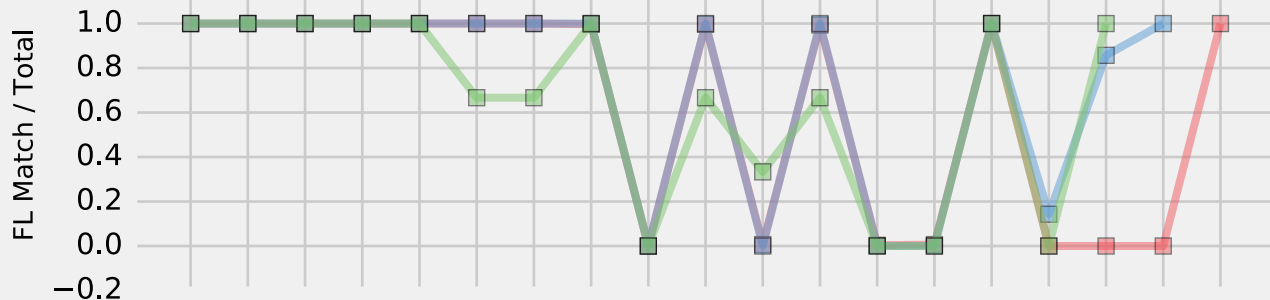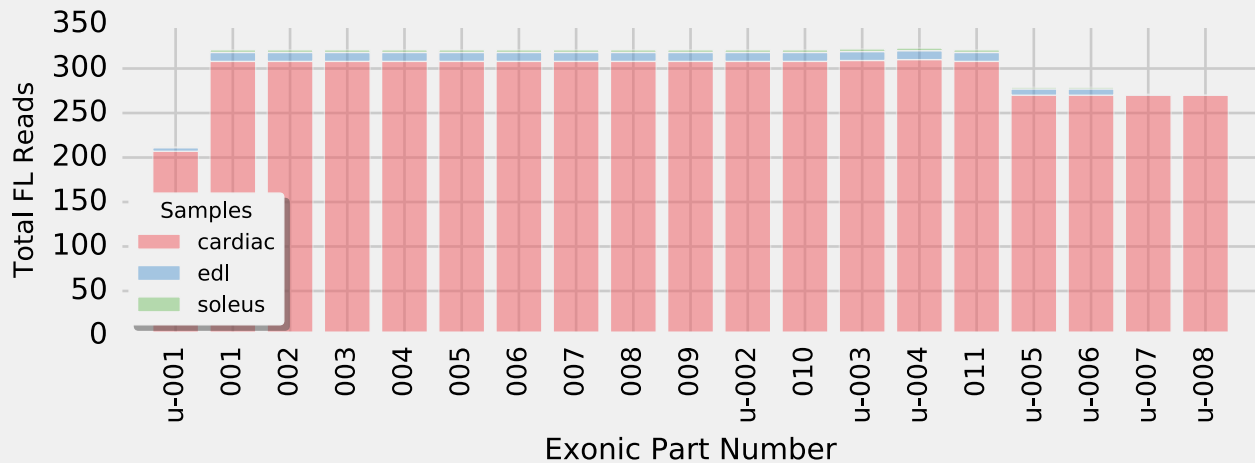

# Slc9a7

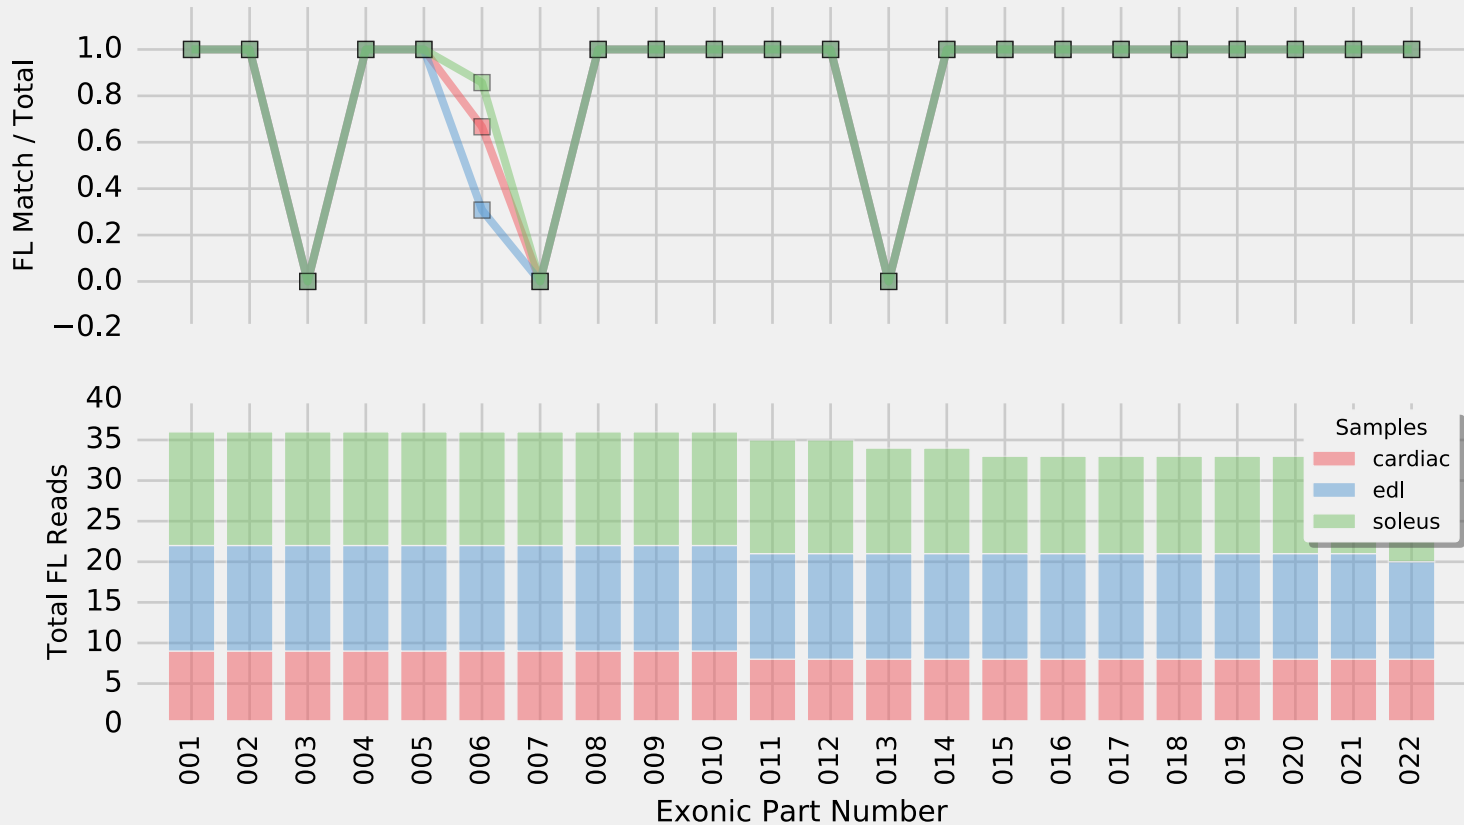



# Slco5a1

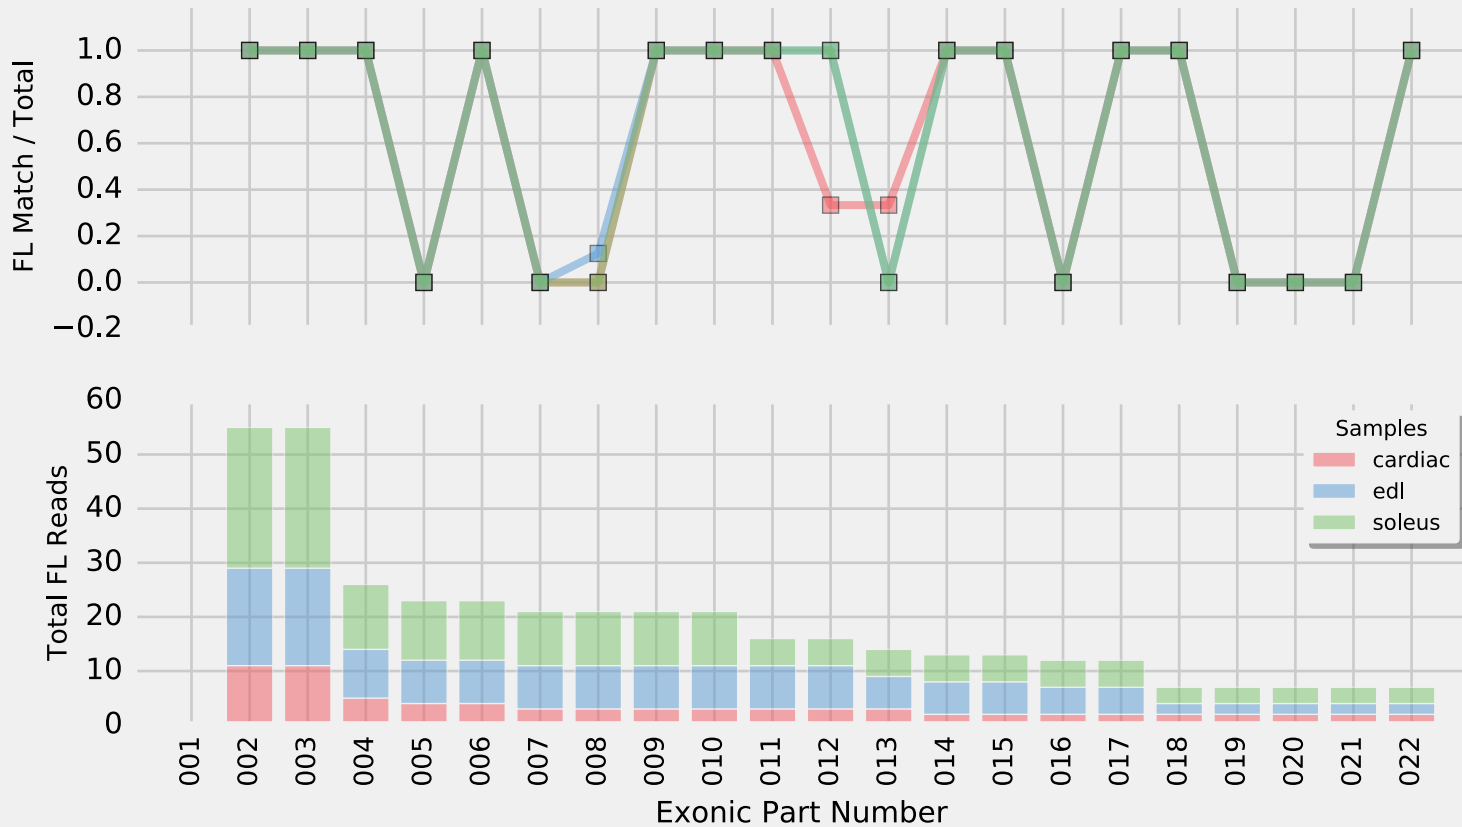

# Slk

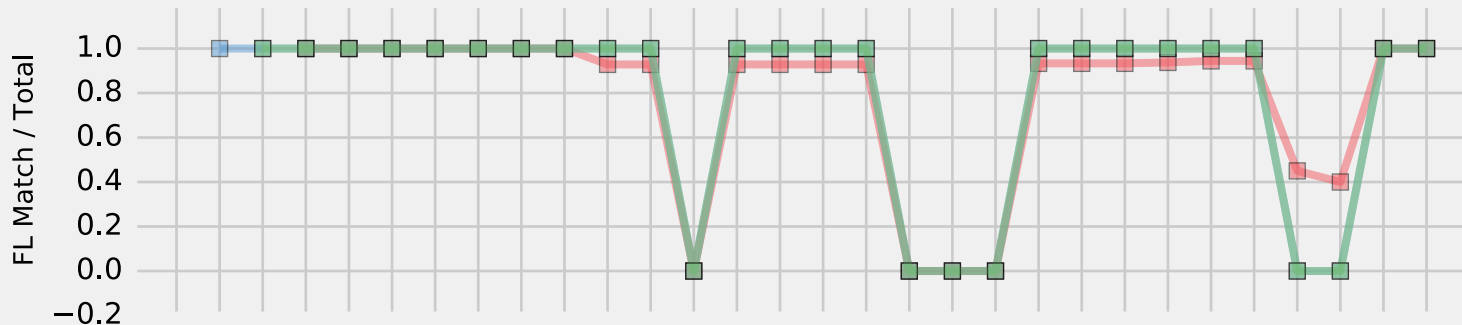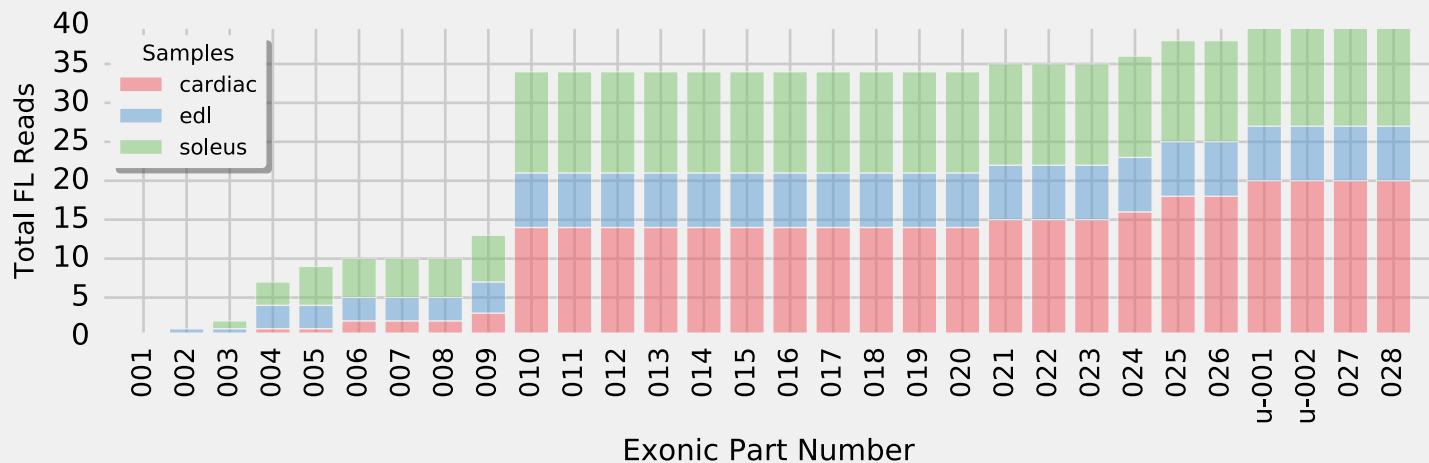

# Simap

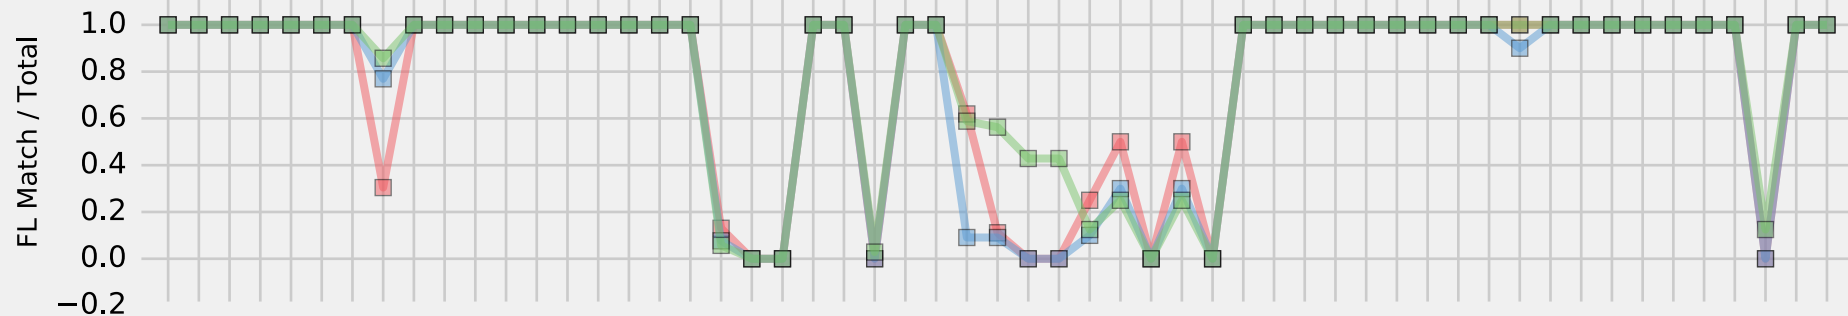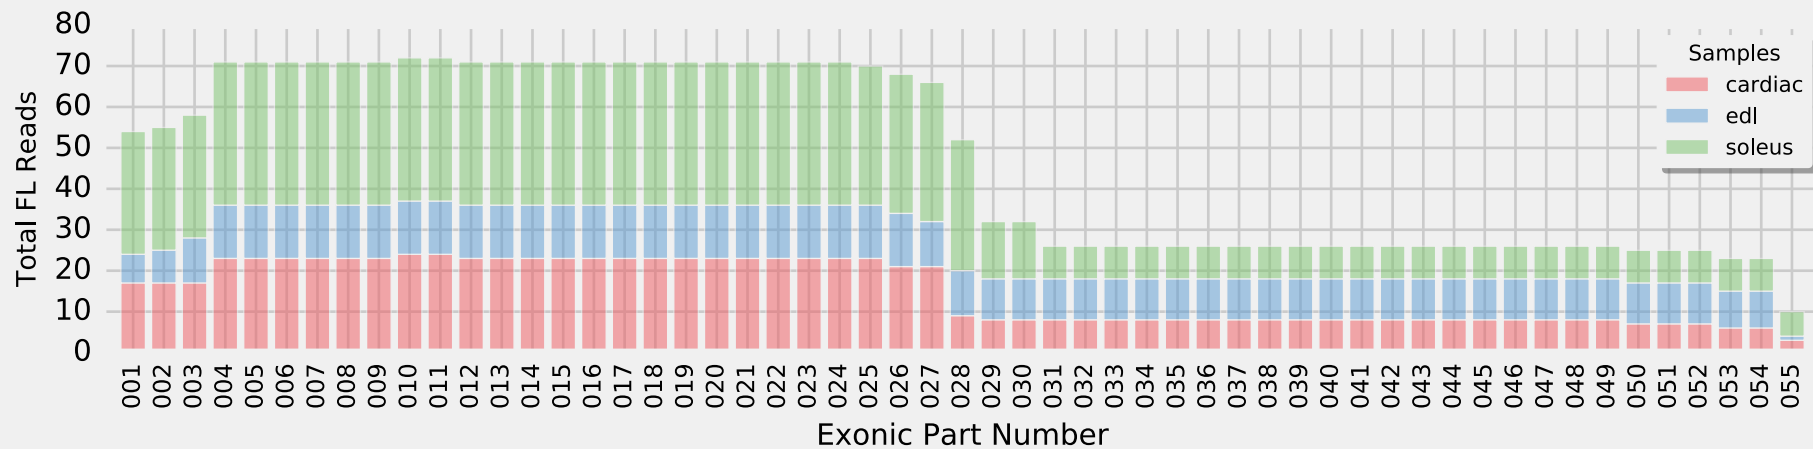

# Smad5

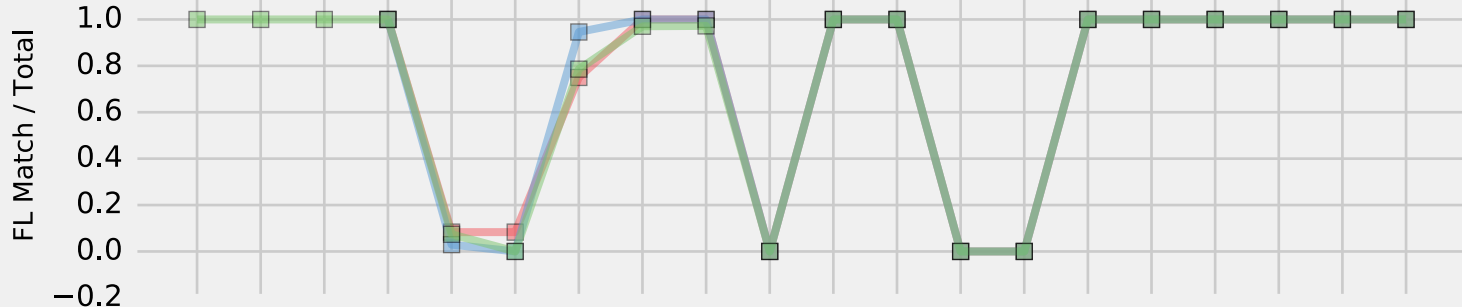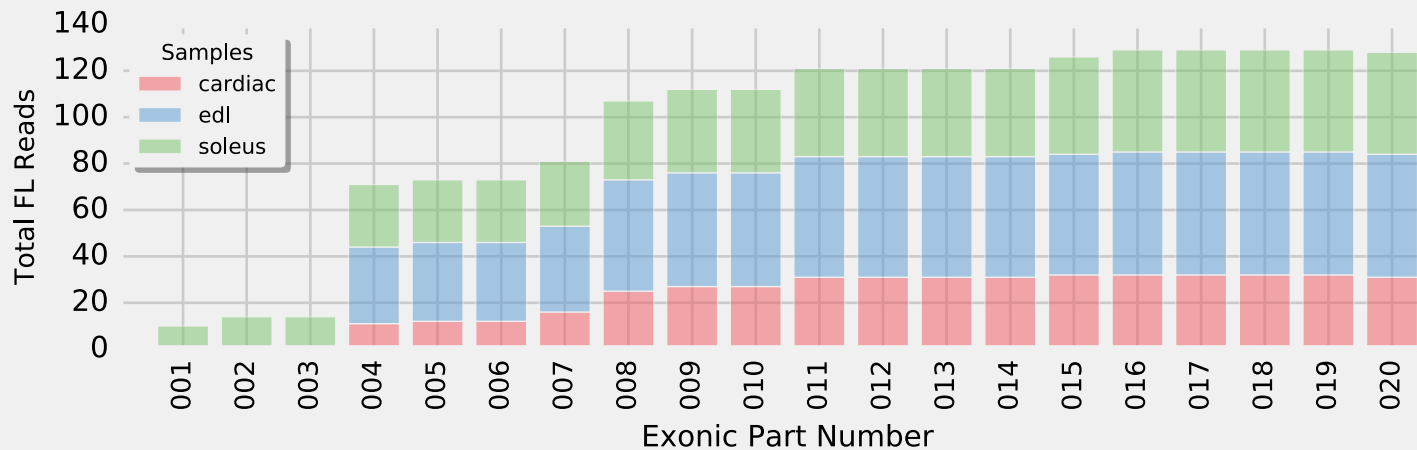

# Smarca2

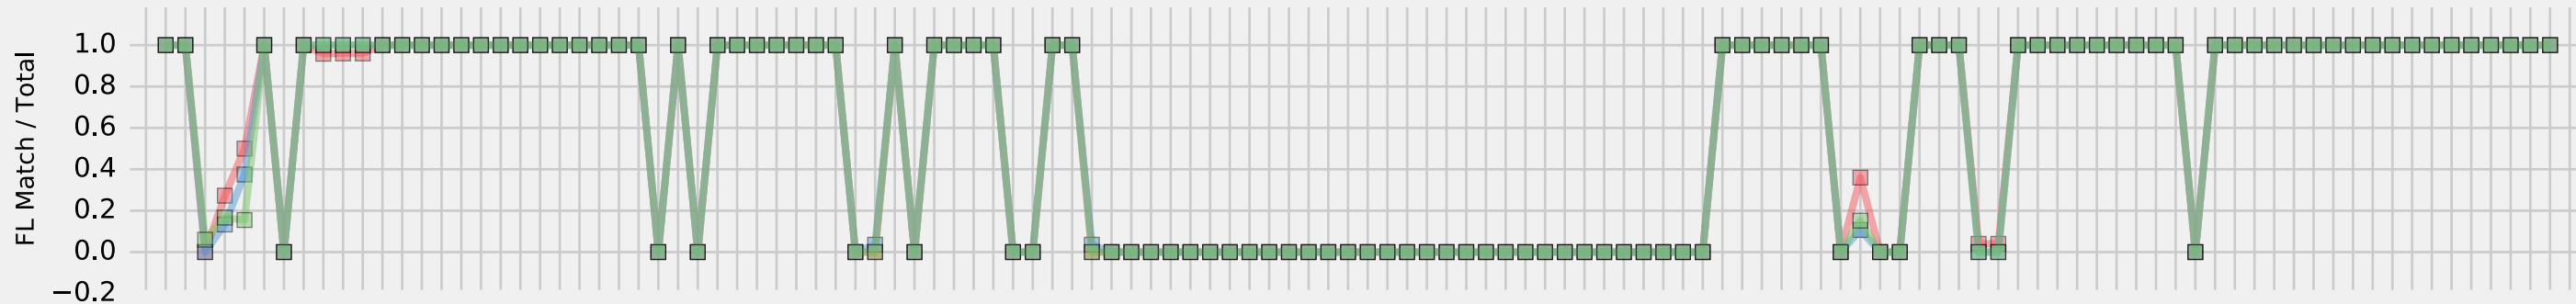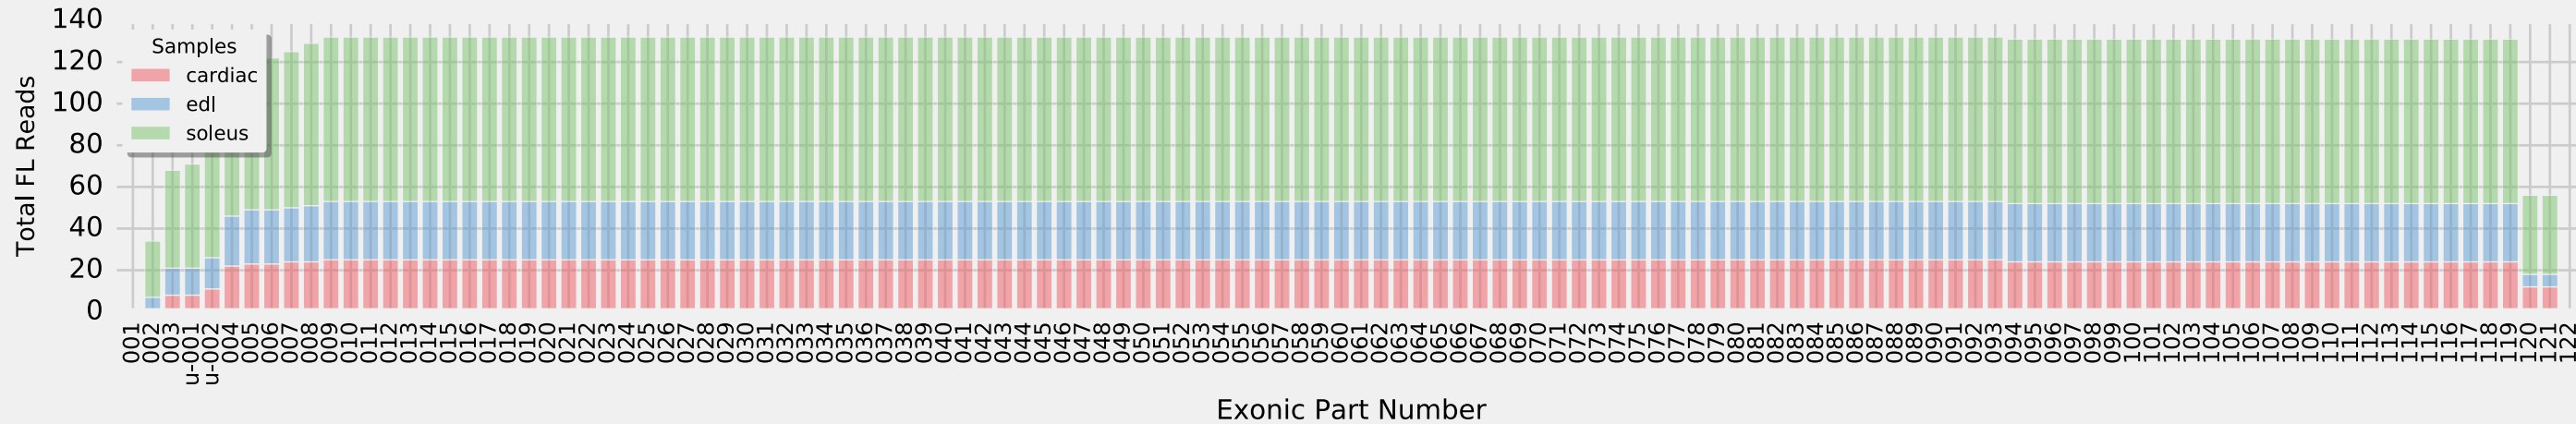

# Smc5

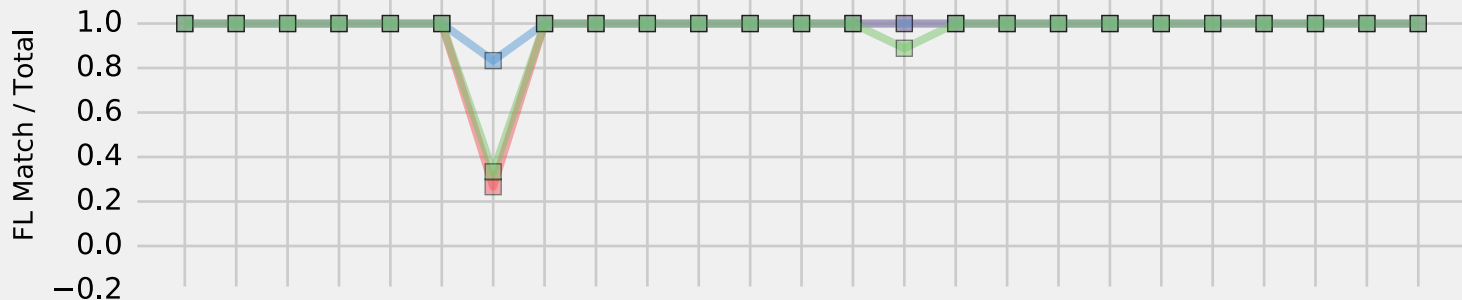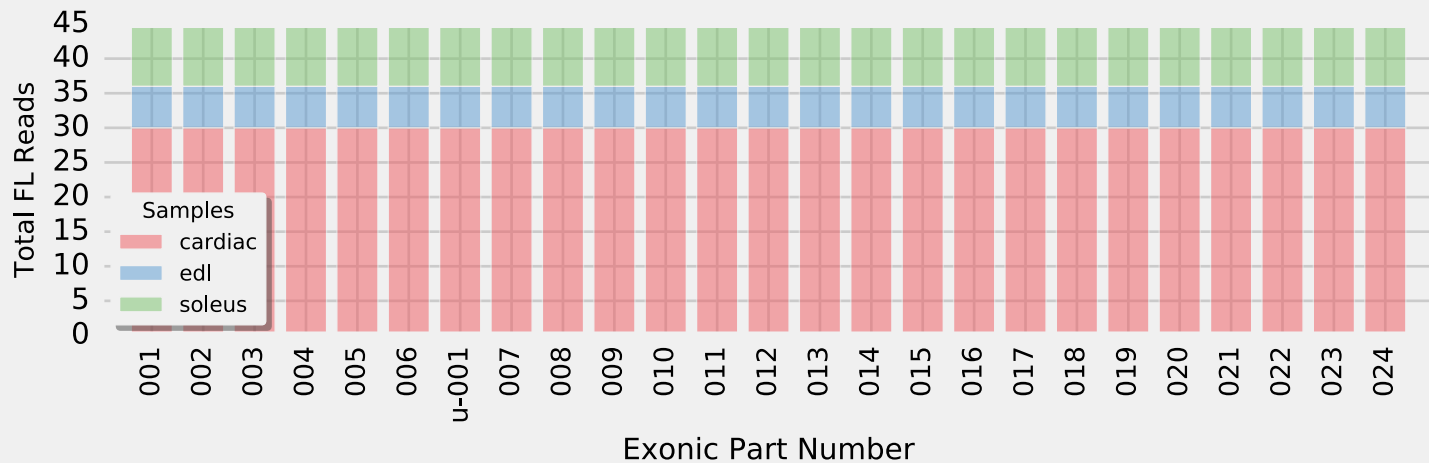

# Smc6

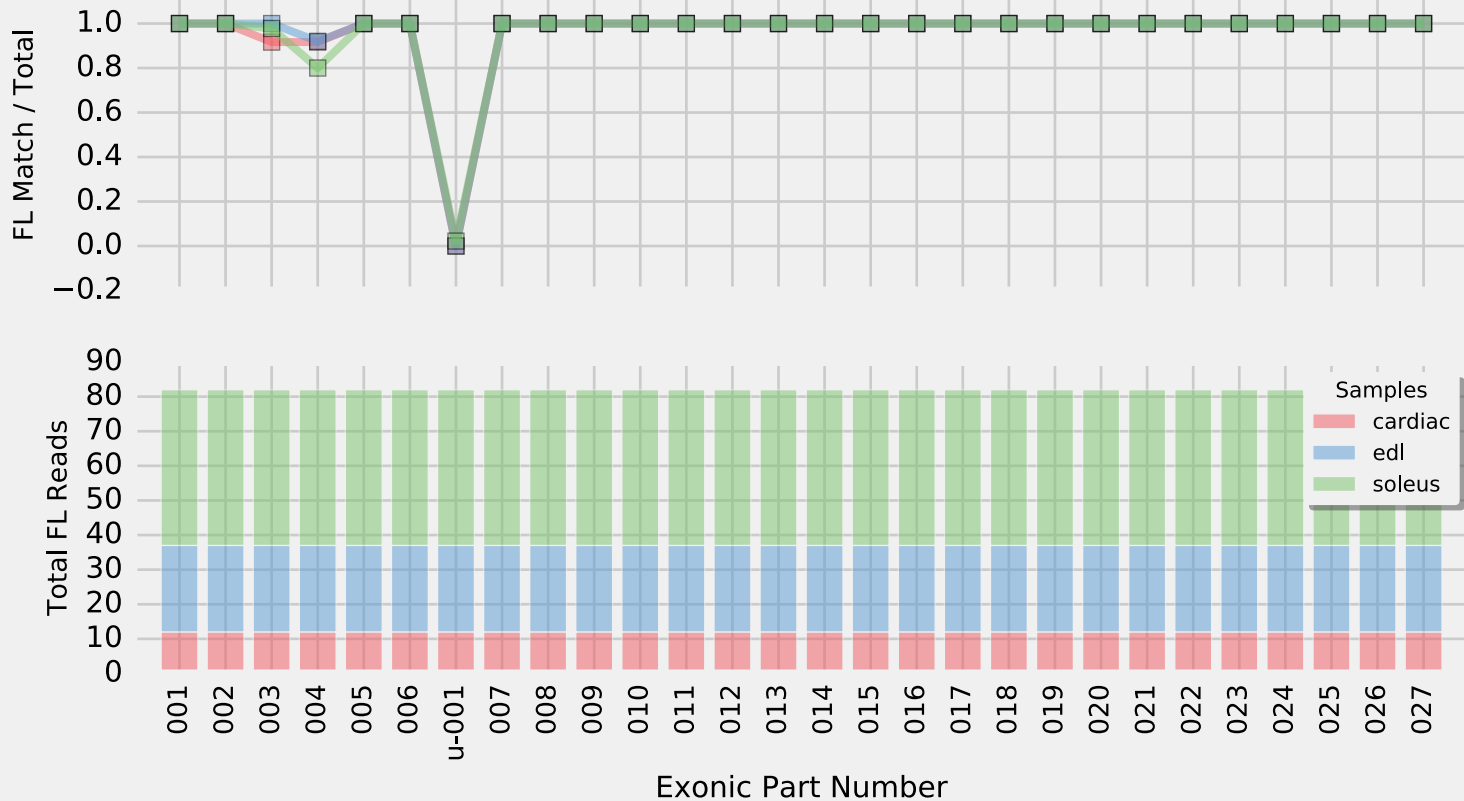

# Smchd1

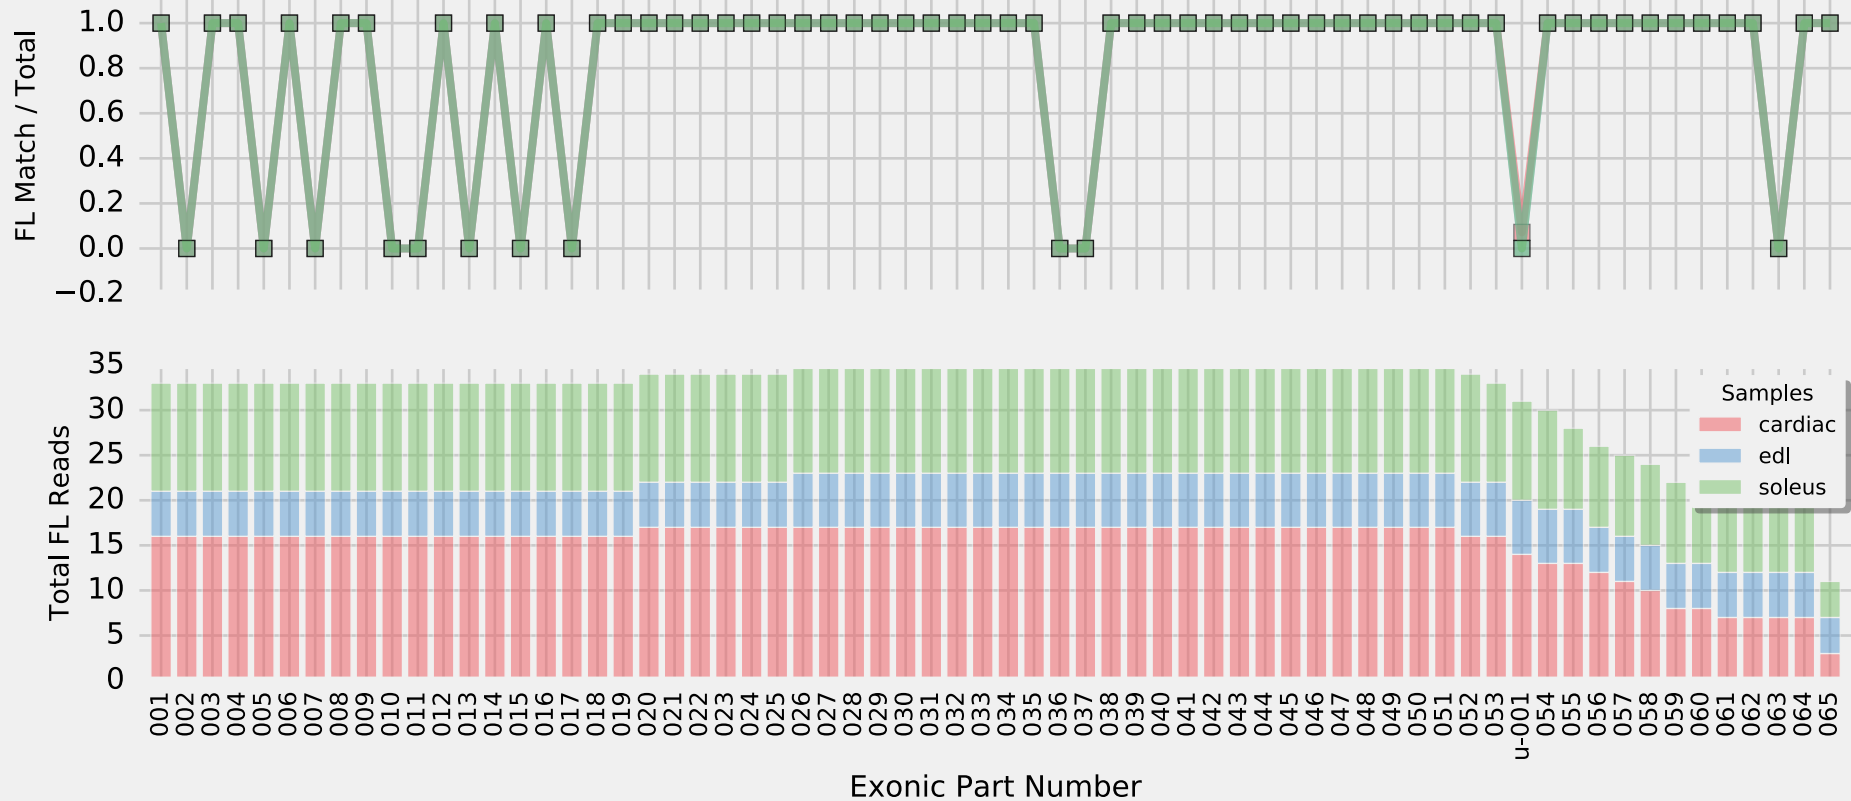



# Smcr8

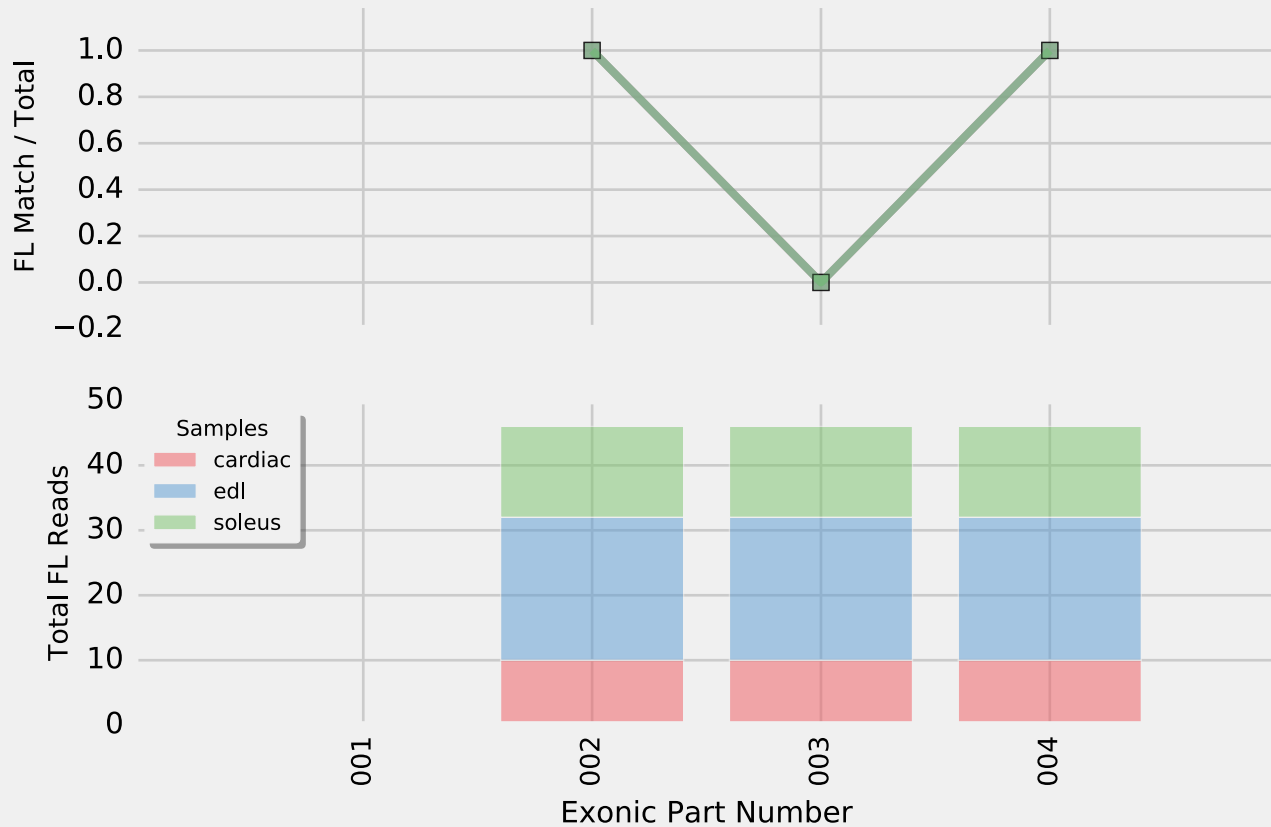

# Smg7

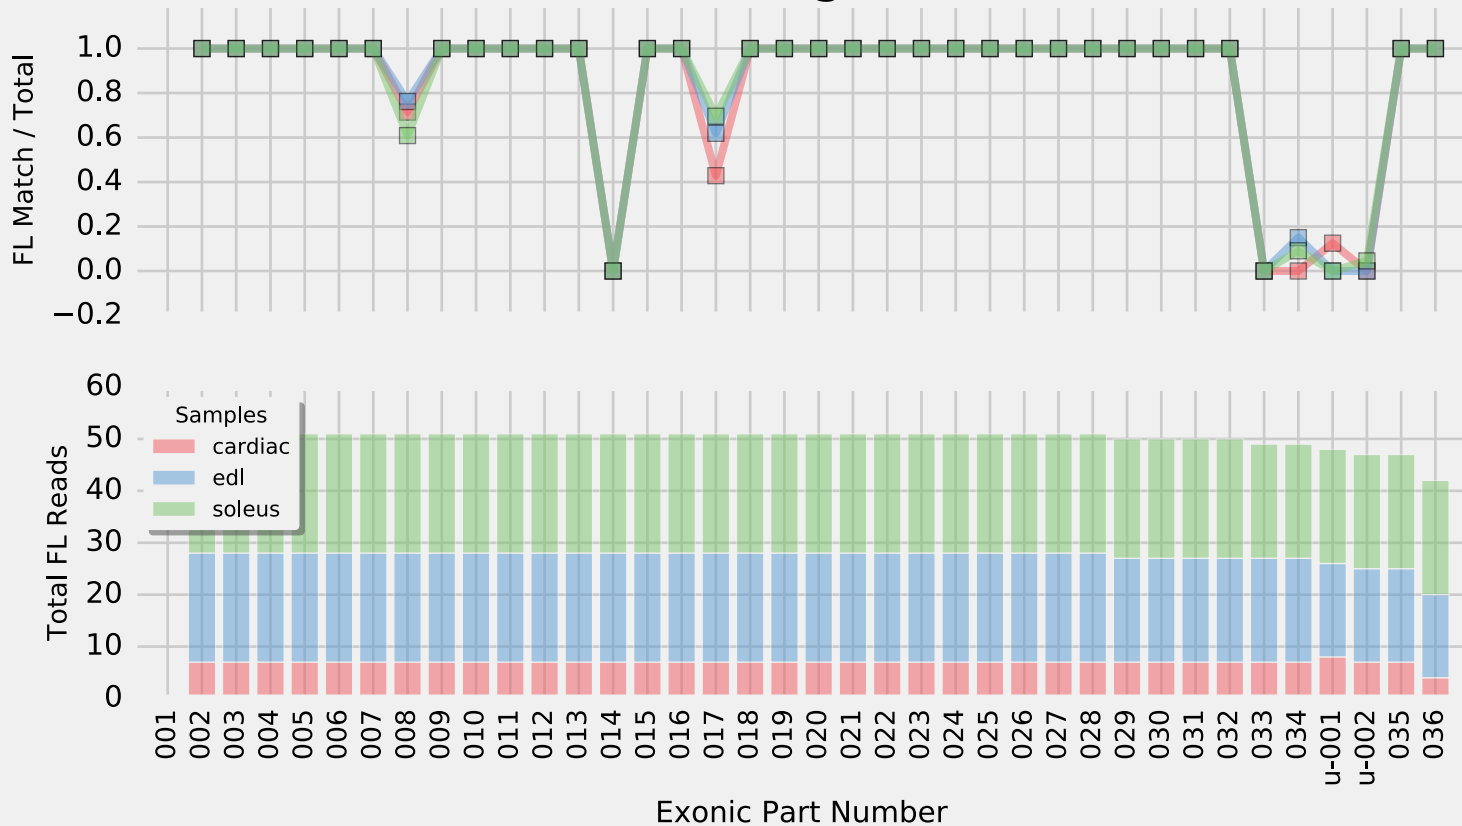

# Snrnp200

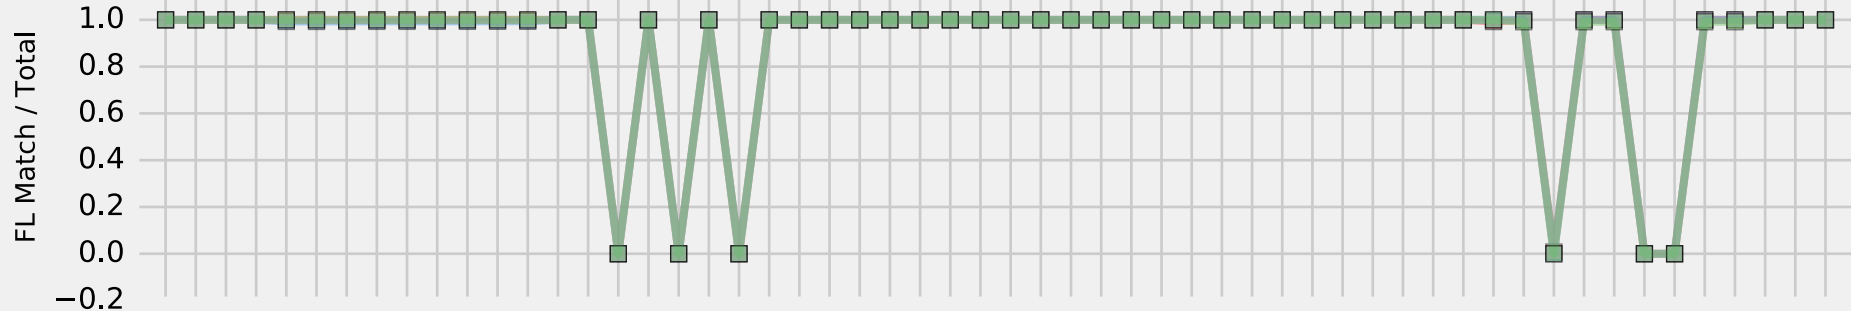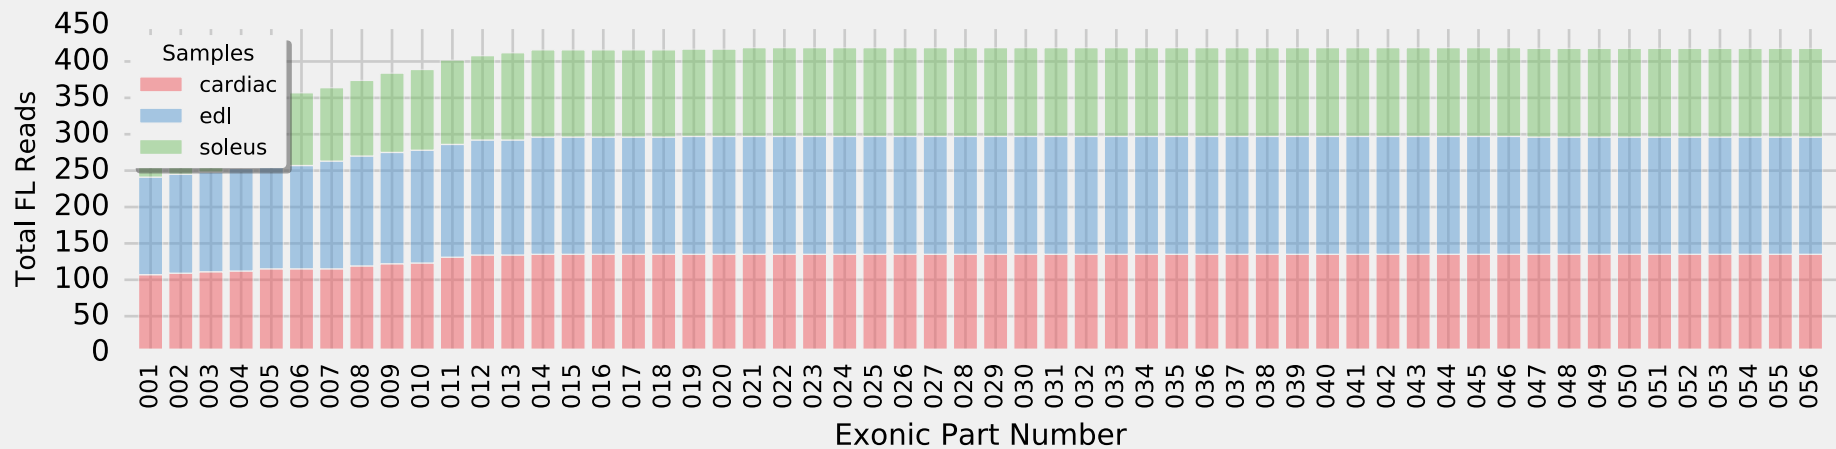

# Snx13

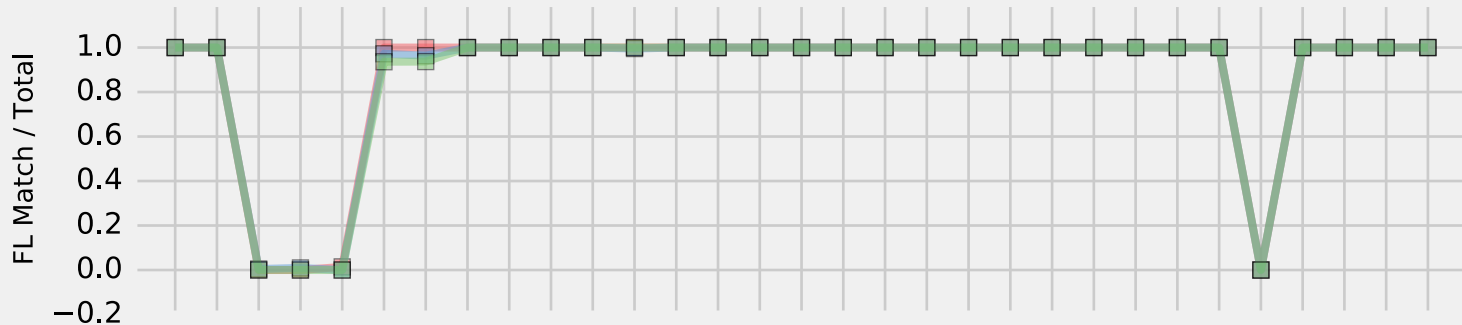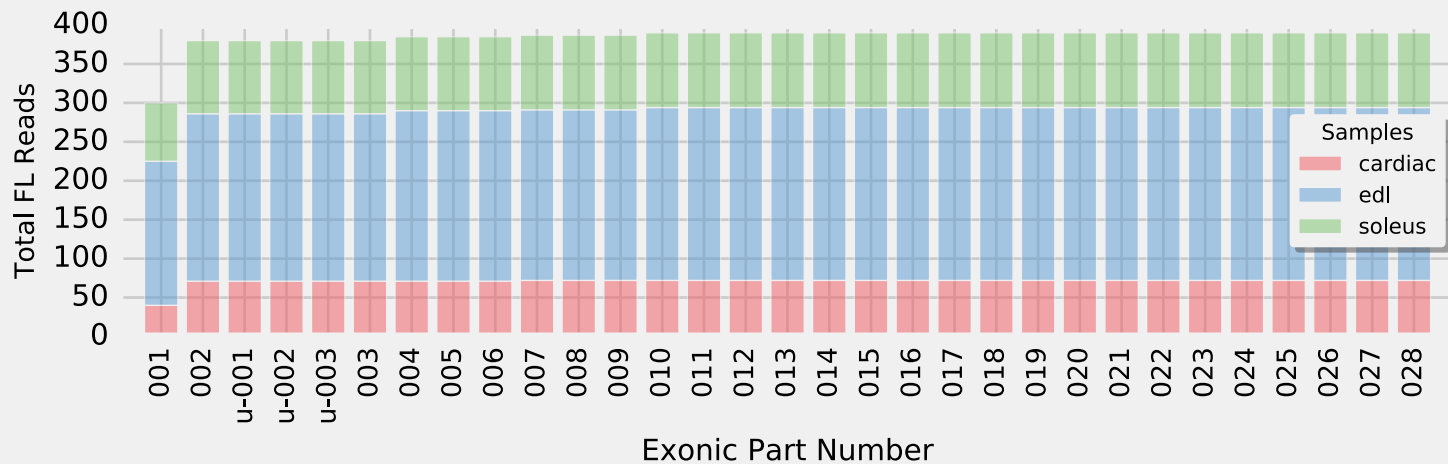

# Socs6

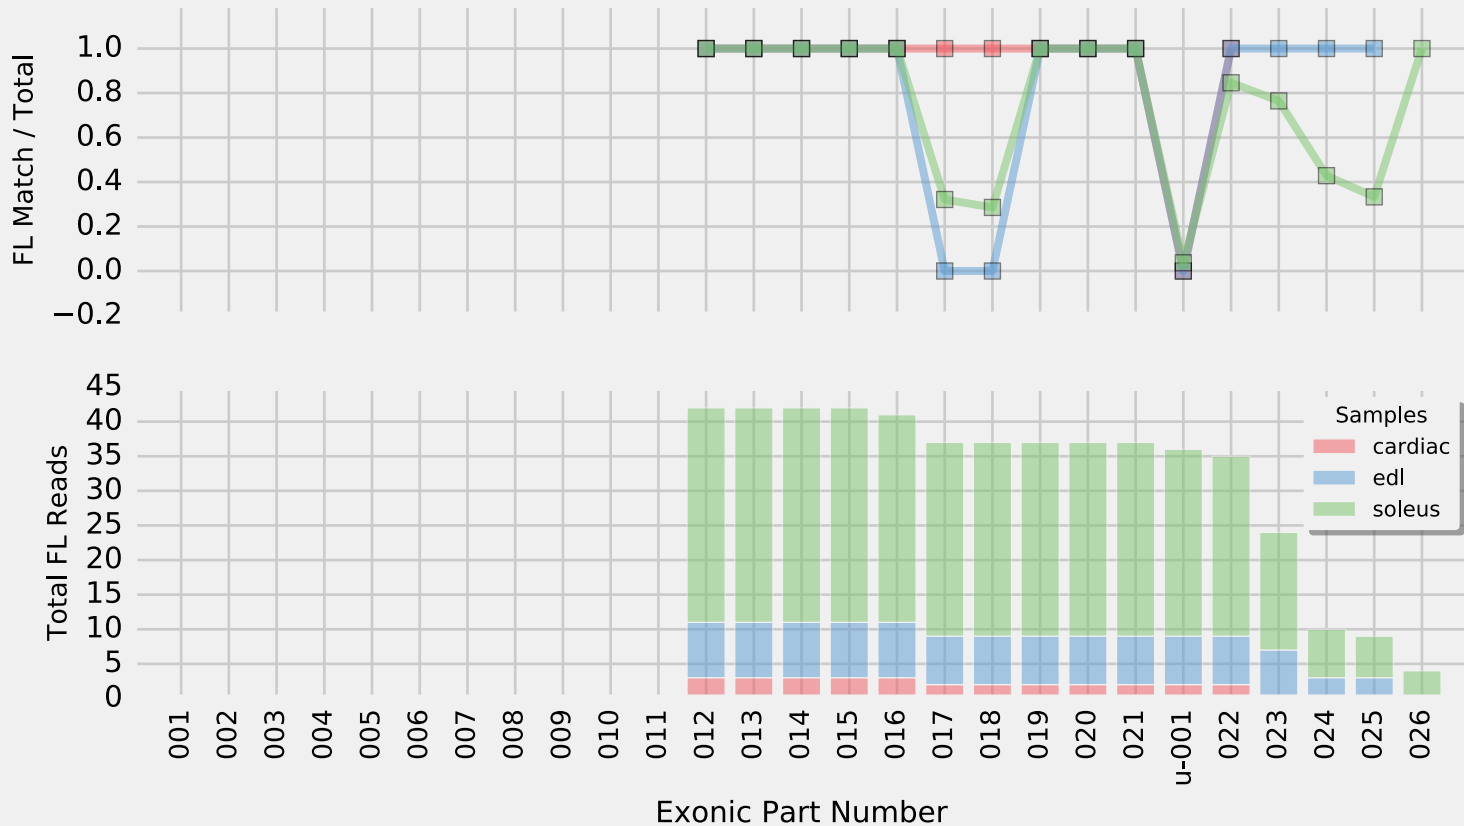

# Sod2

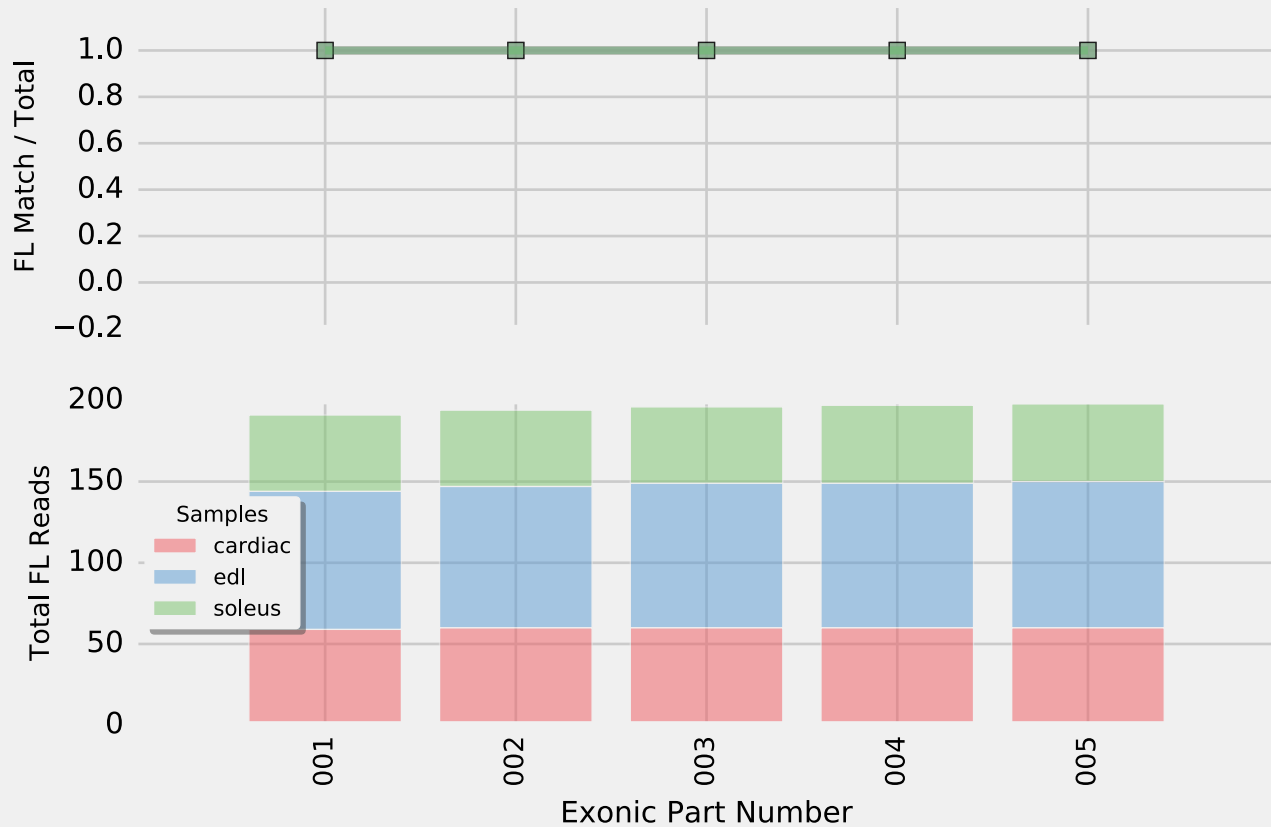

# Son

FL Match / Total

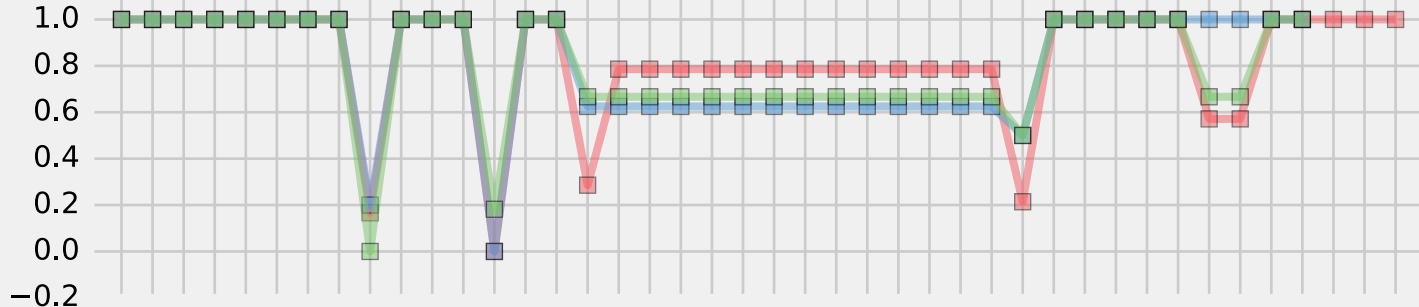

Total FL Reads

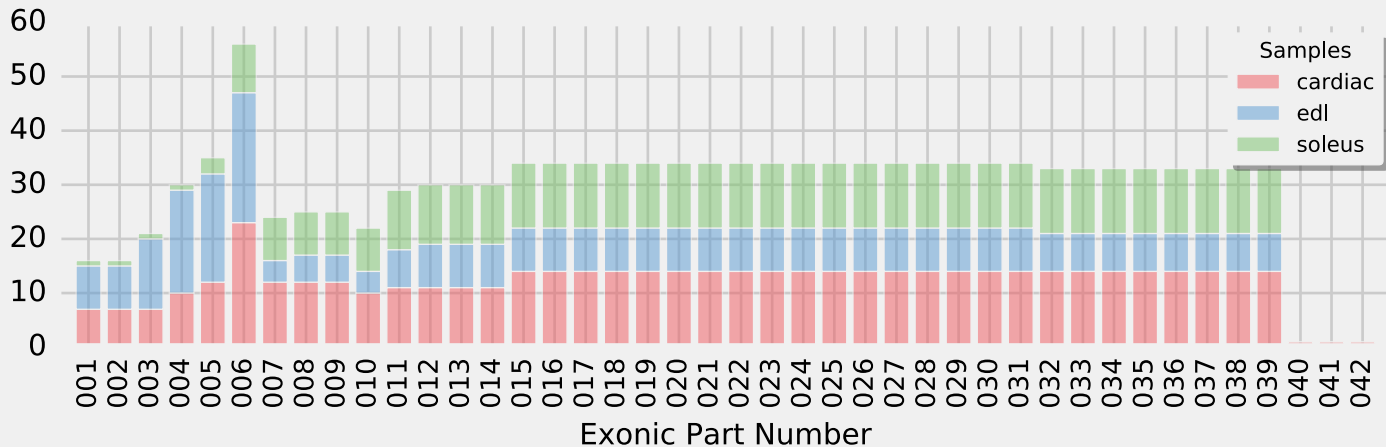

# Sorbs1

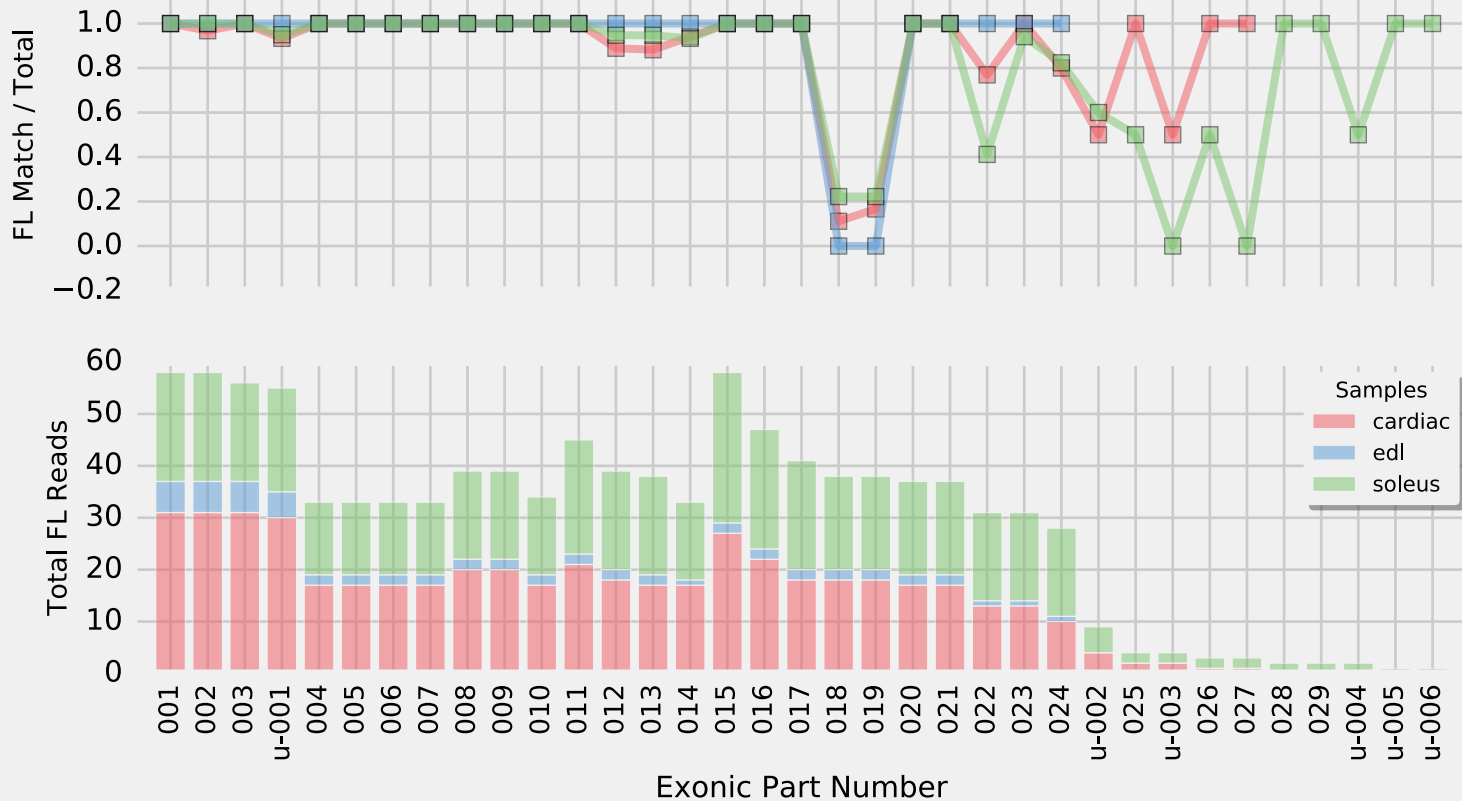



# Sorbs2

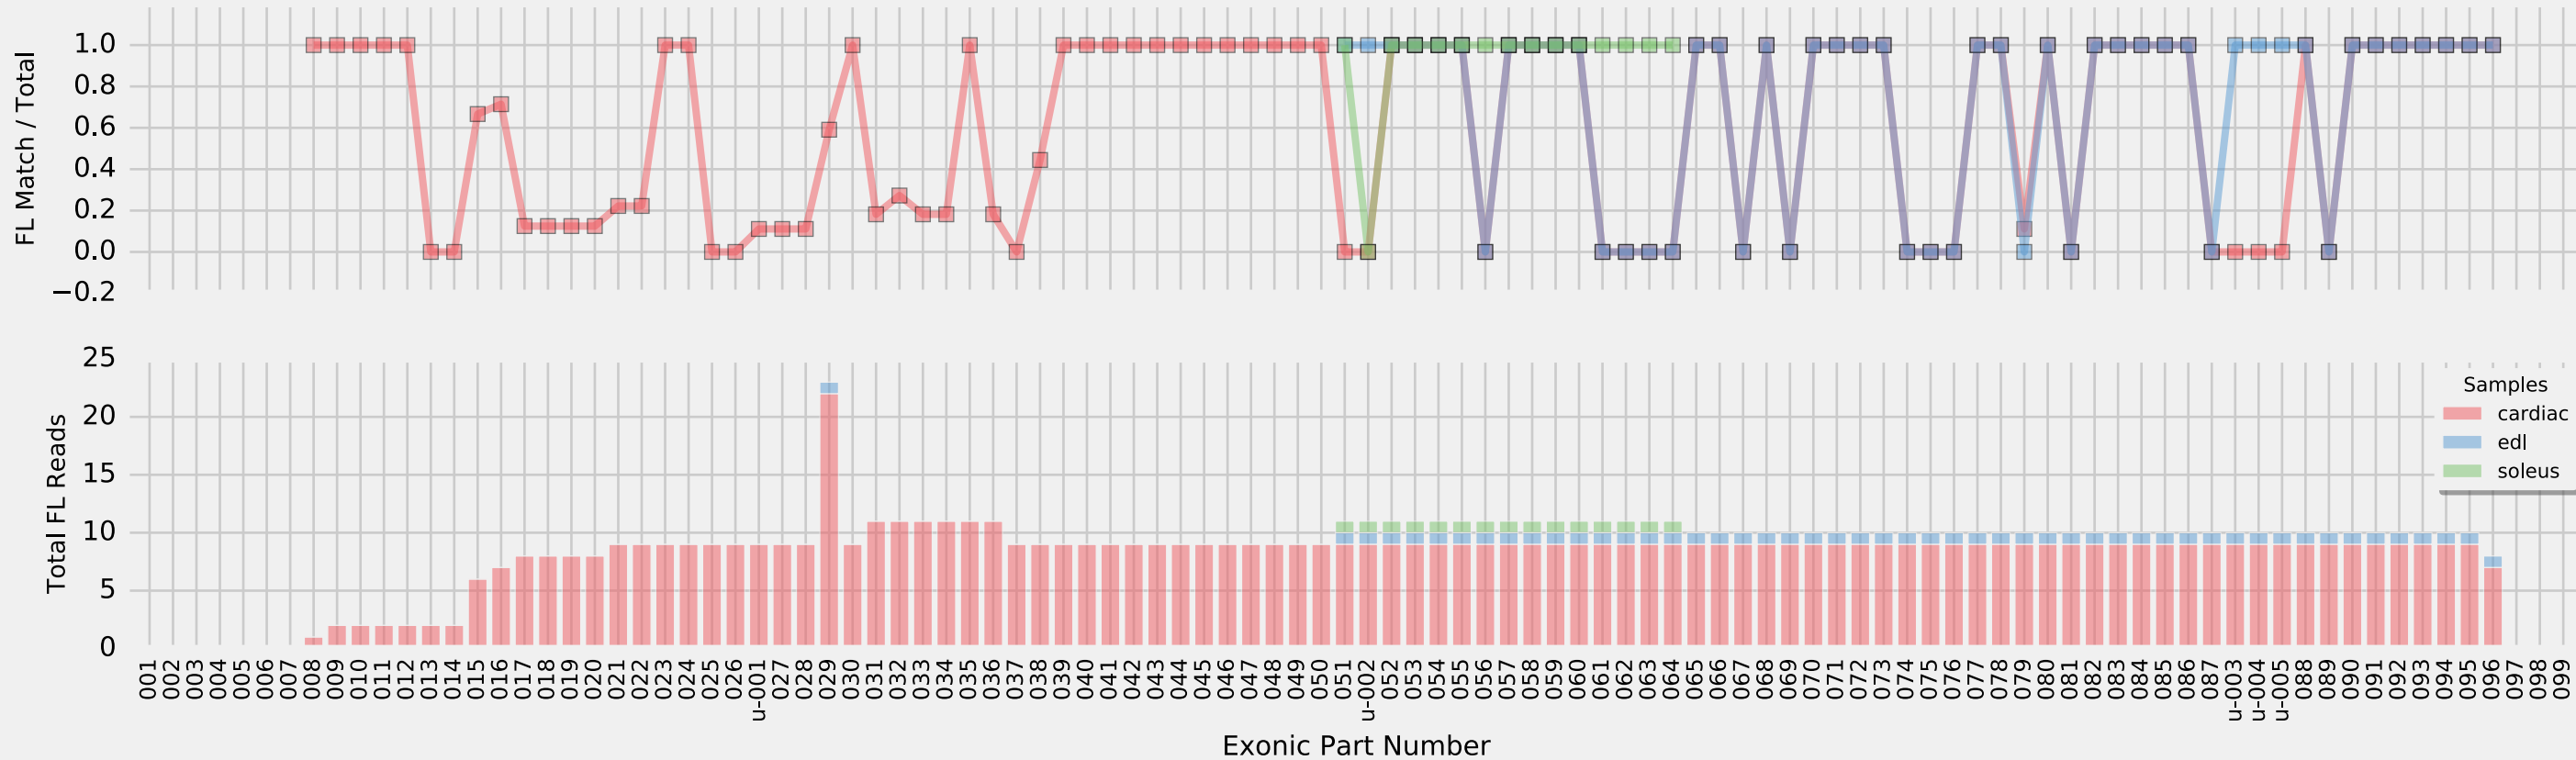

# Sorl1

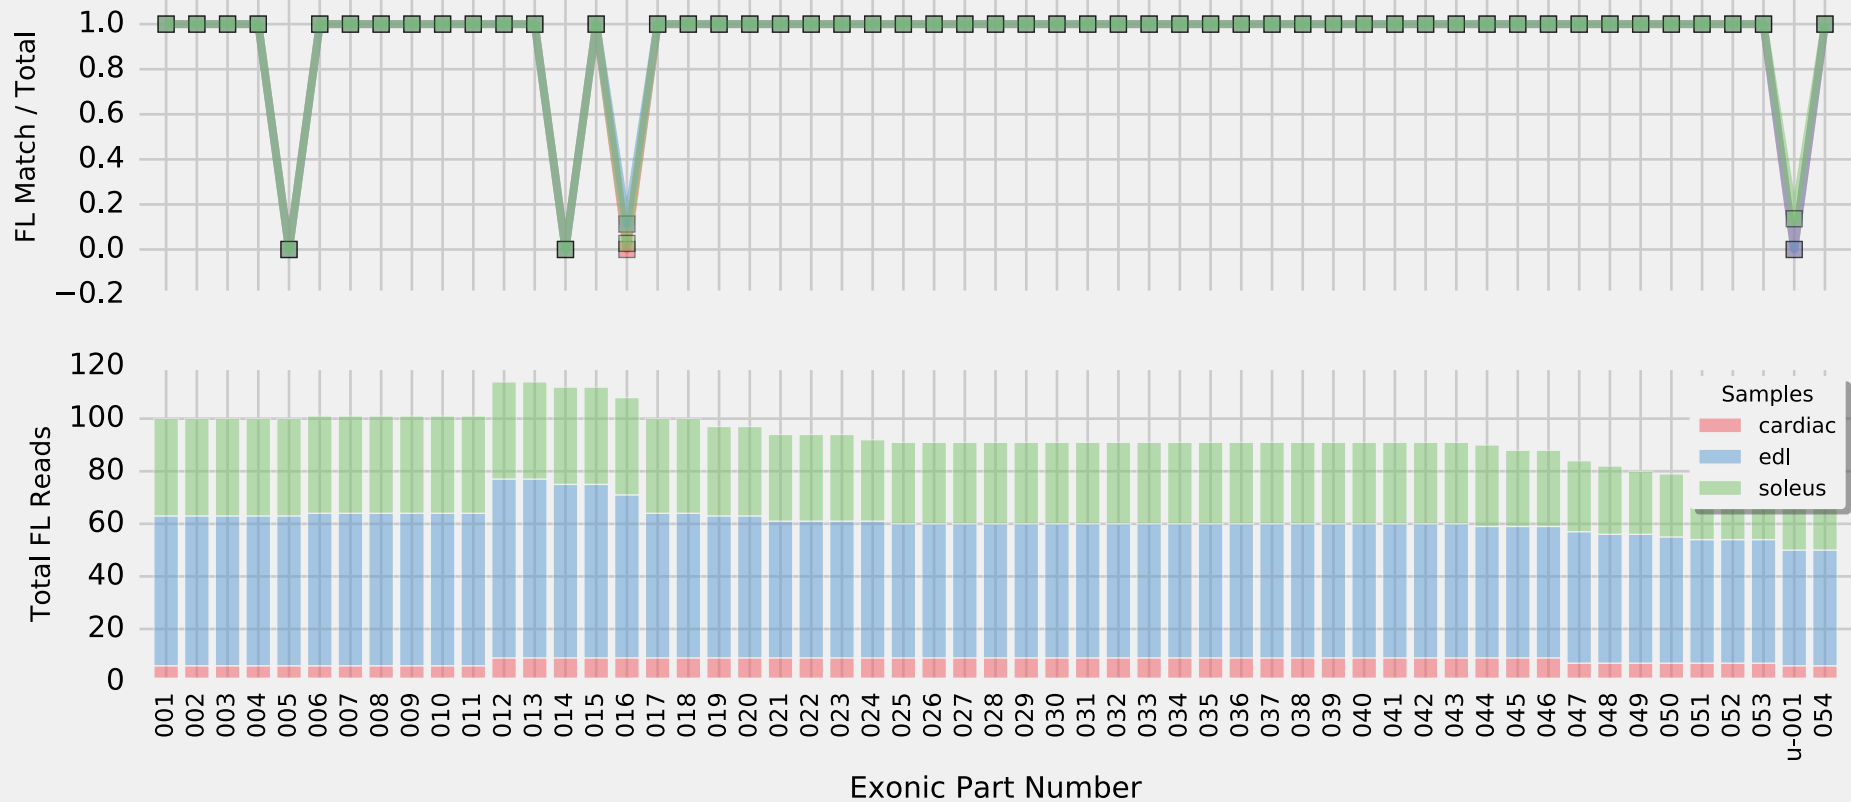

# Sox6

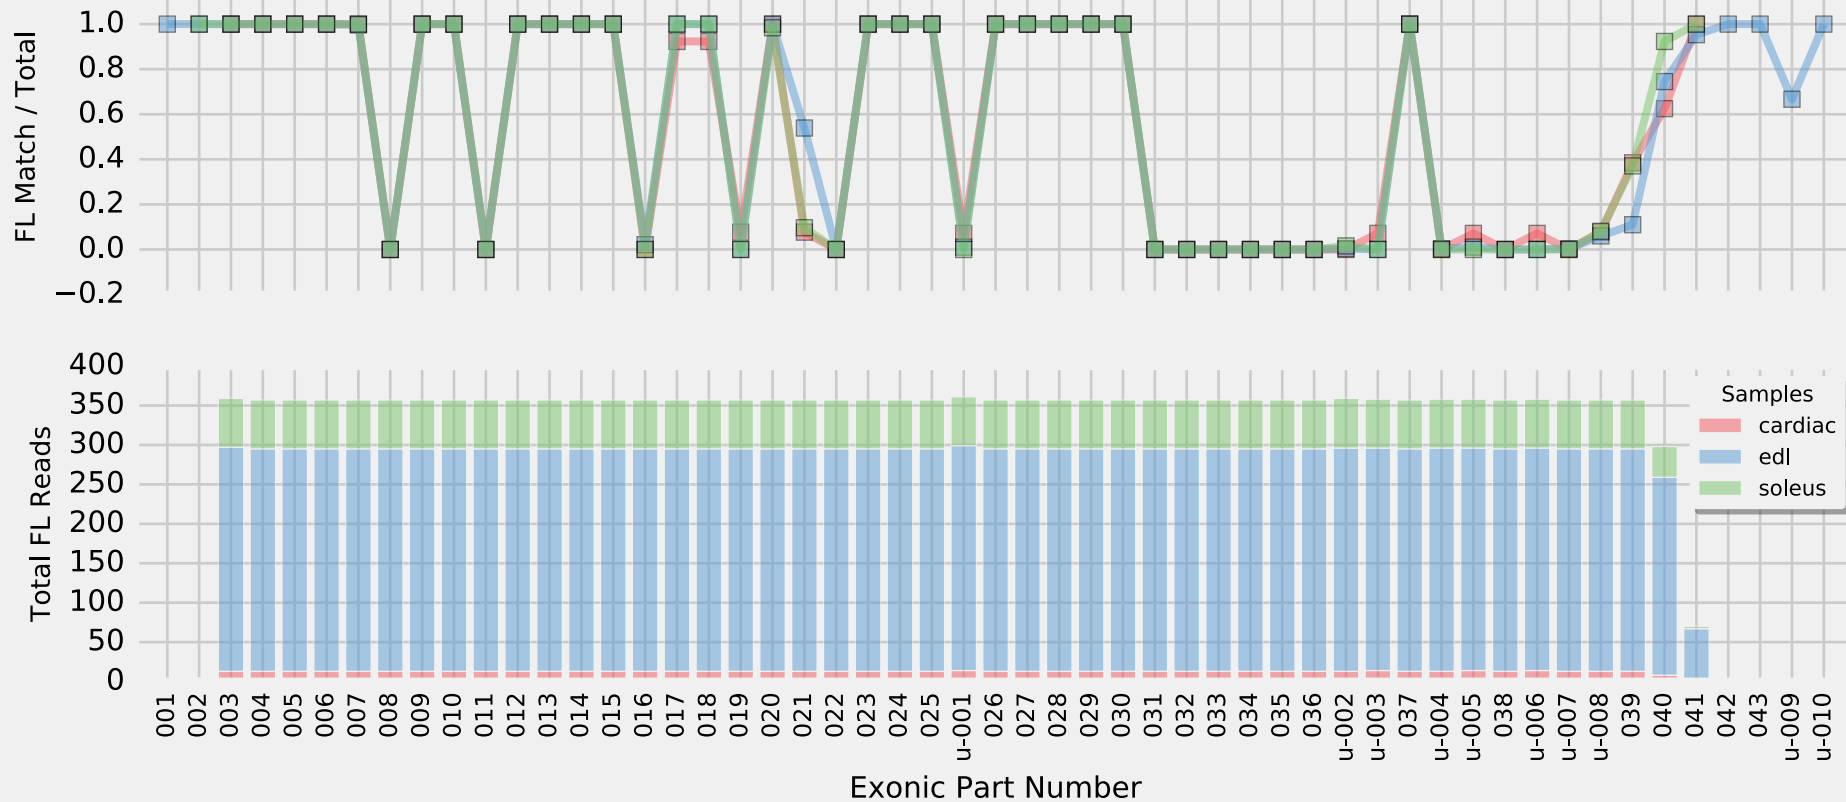

# Sp4

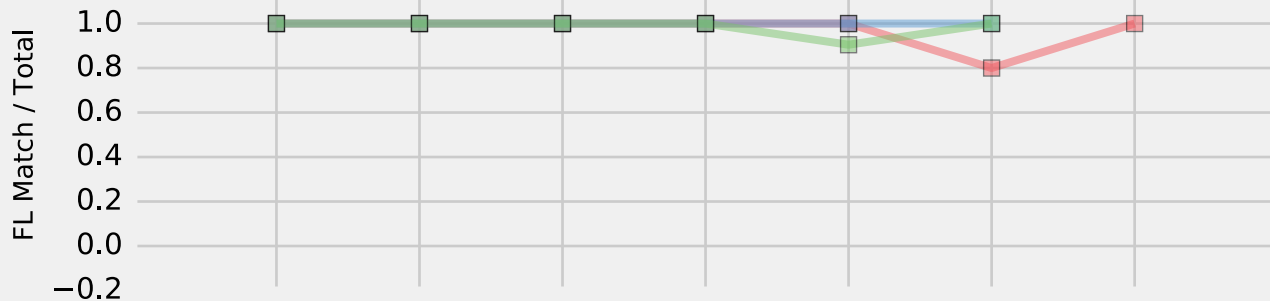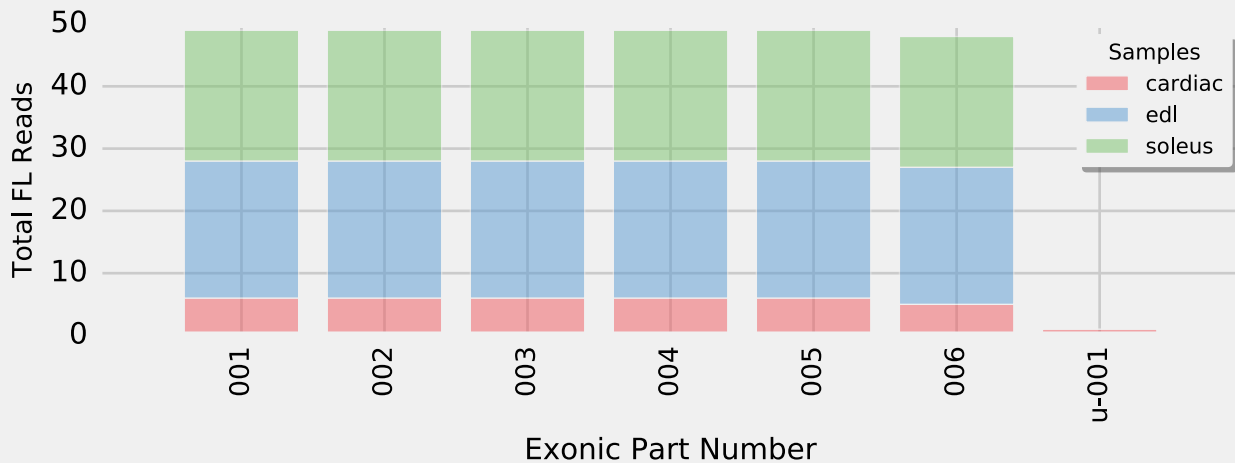

# Spag9

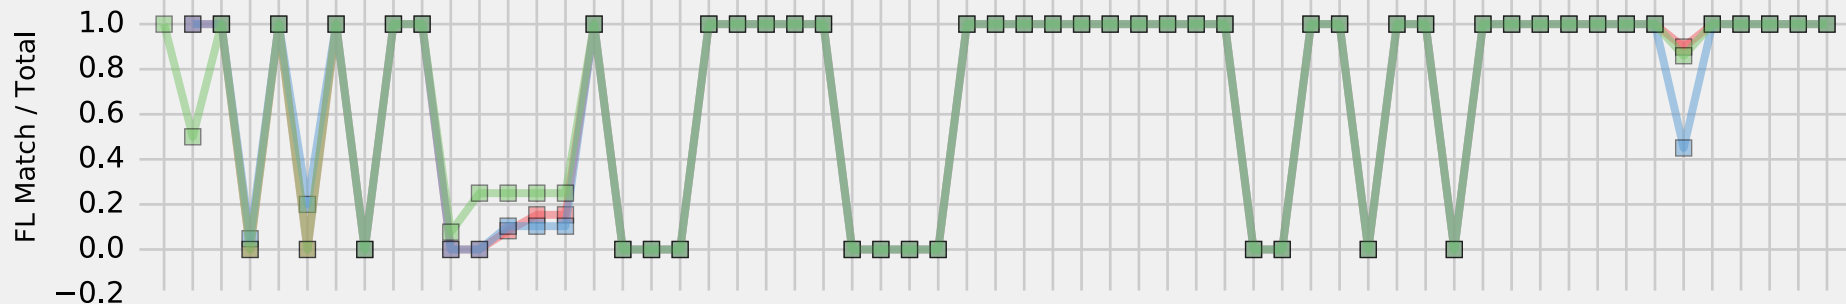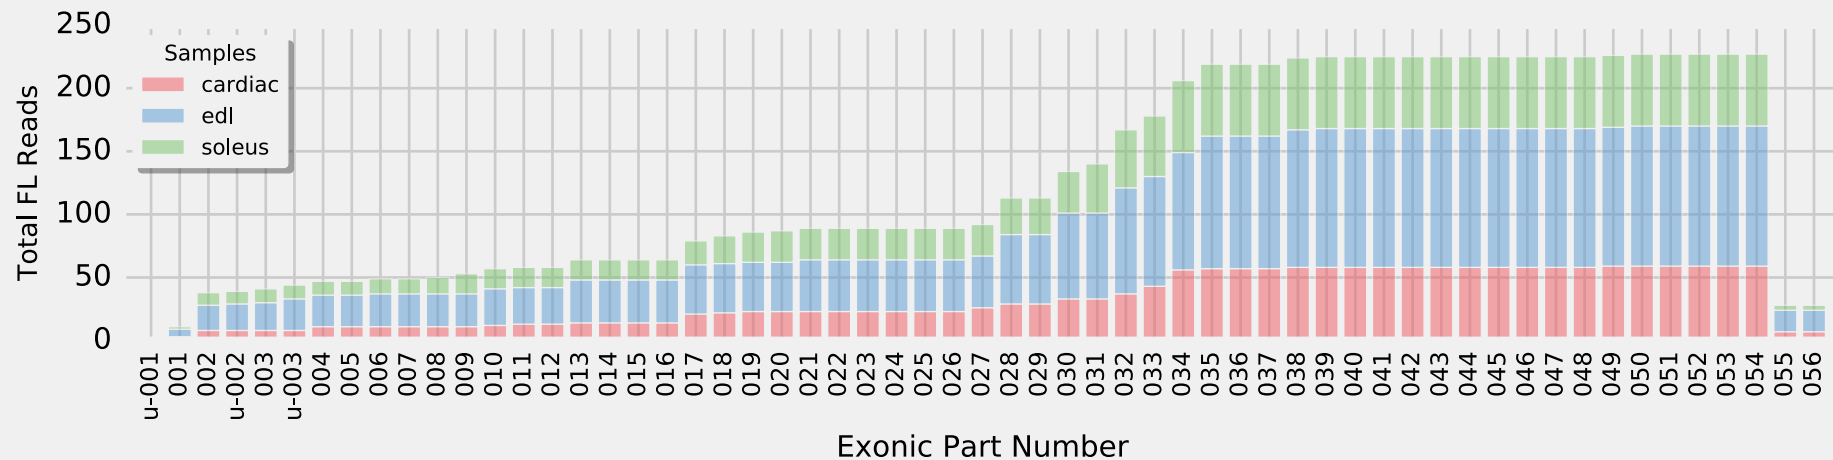

# Specc1l

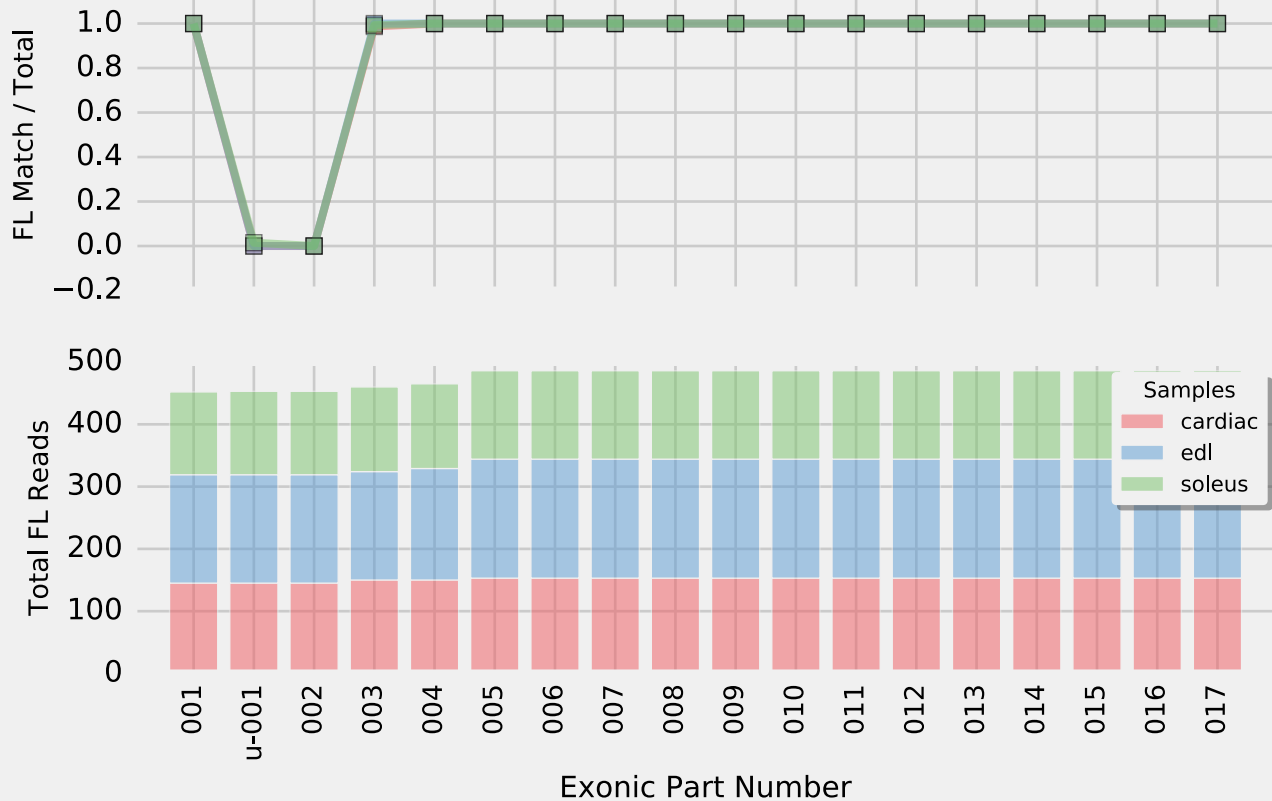

# Sptan1

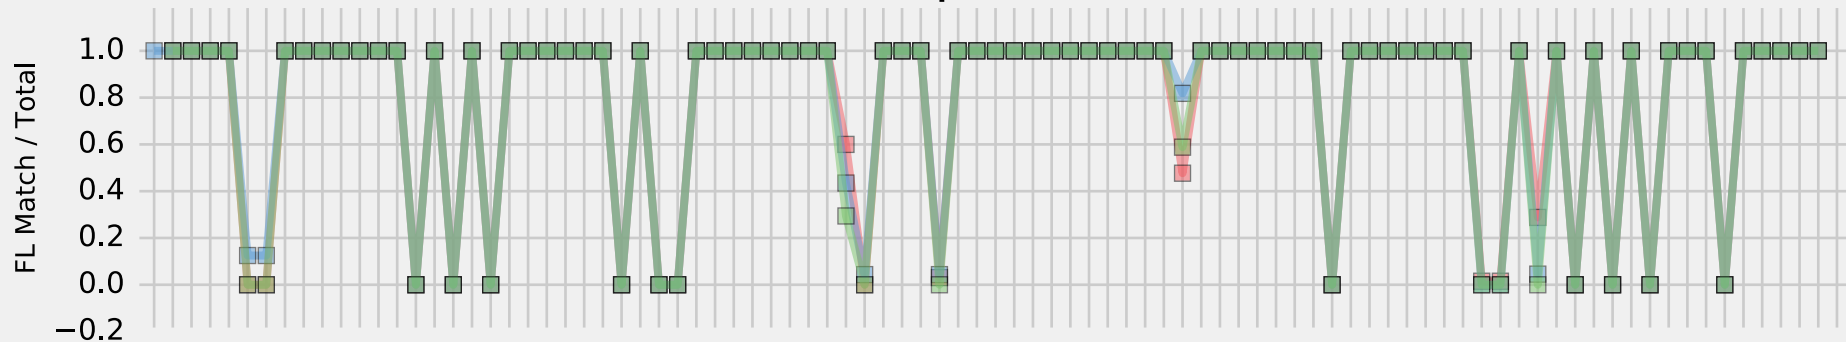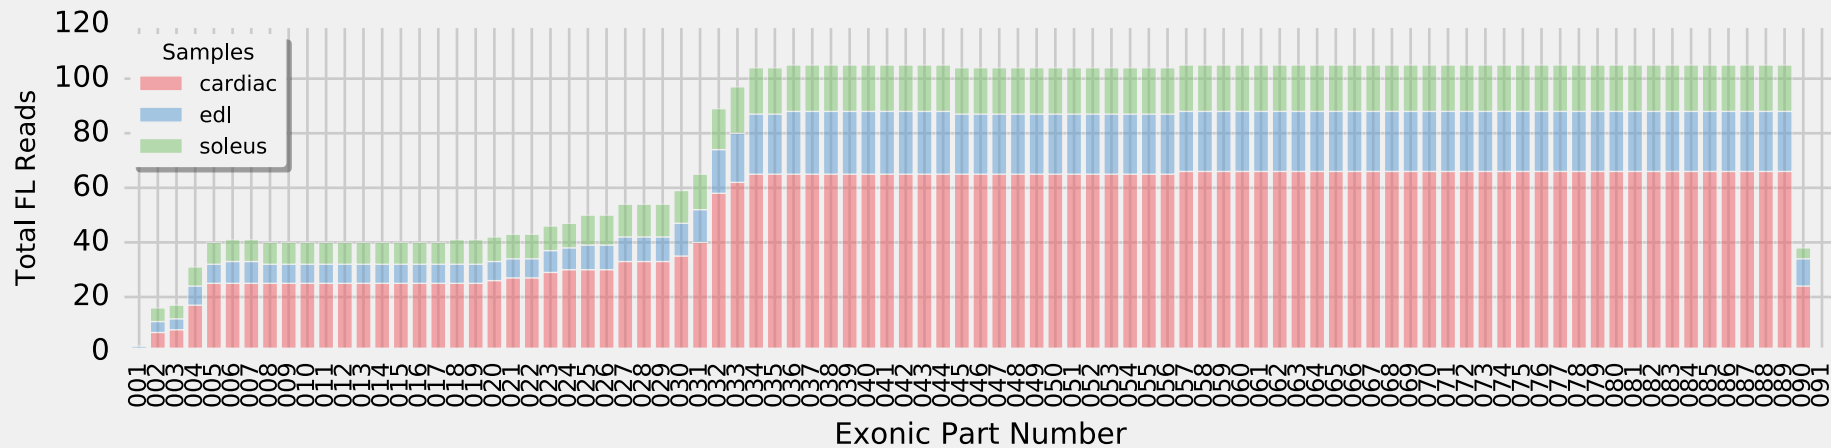

# Sptb

FL Match / Total

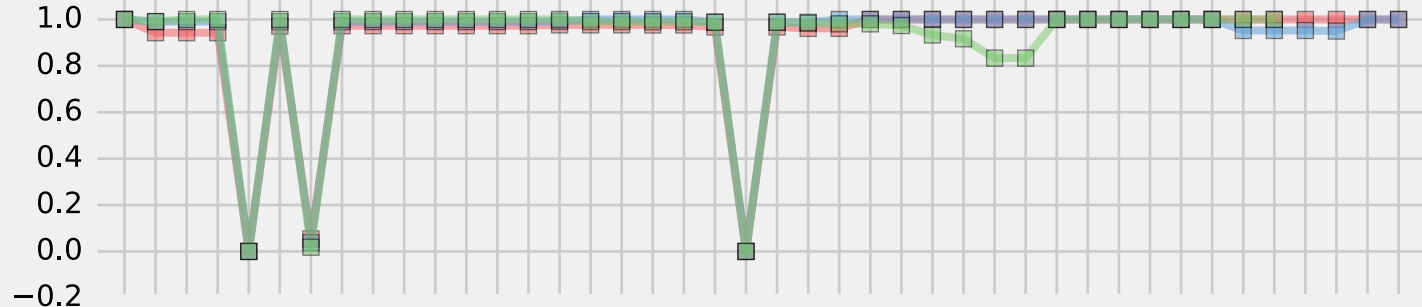

Total FL Reads

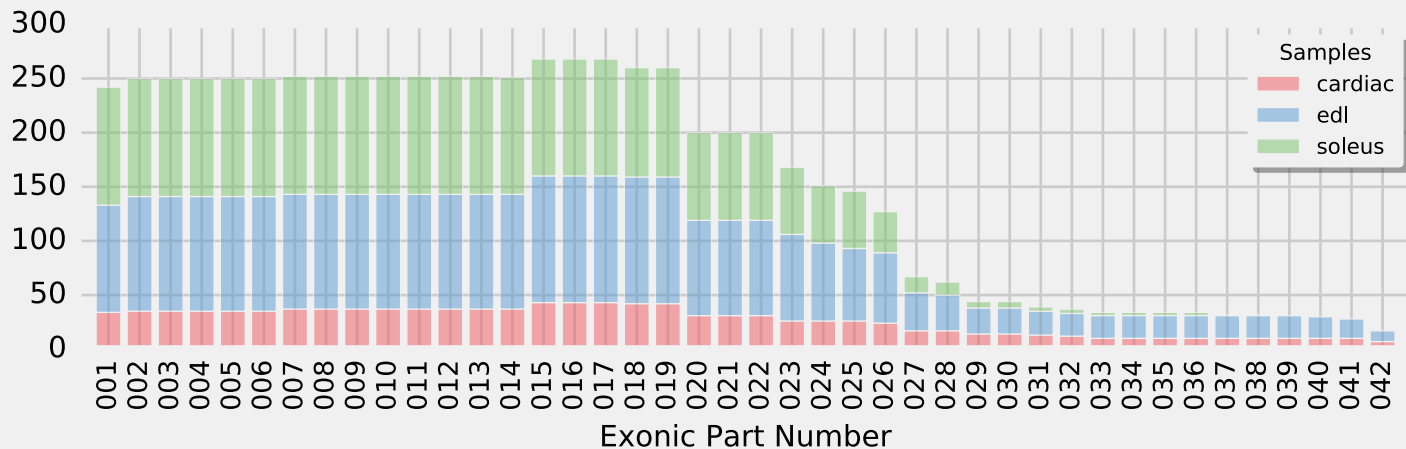



# Sptbn1

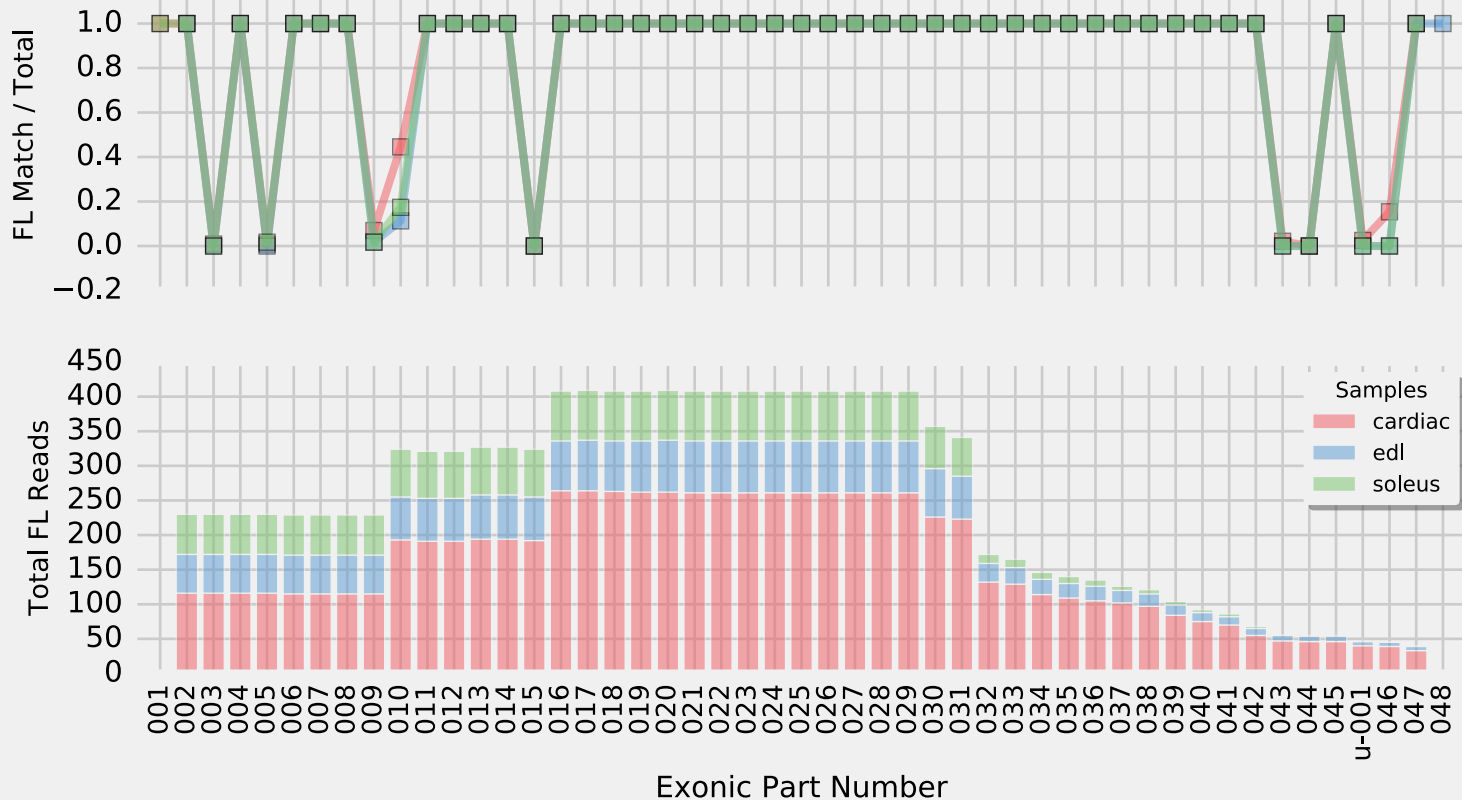

Srl

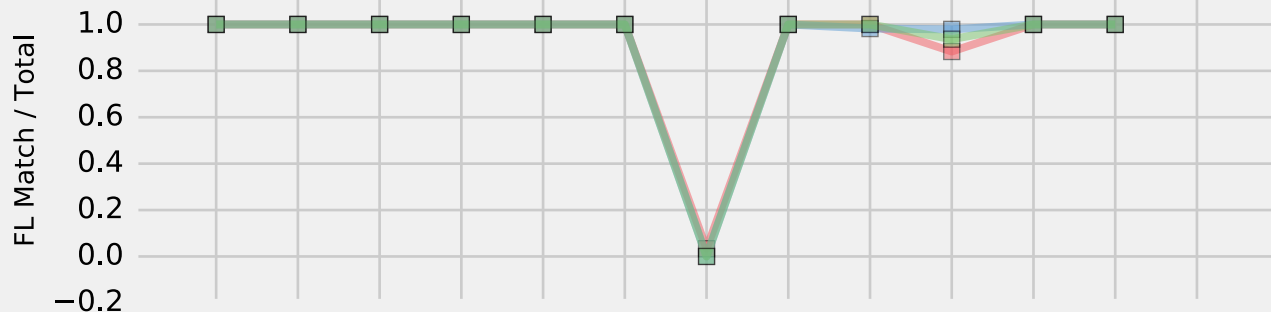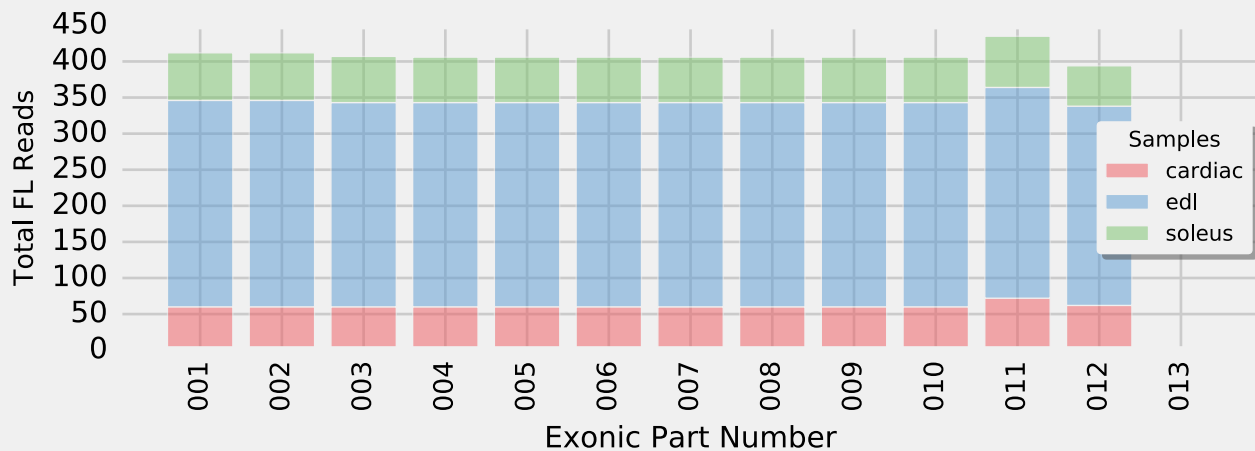

# Srpk2

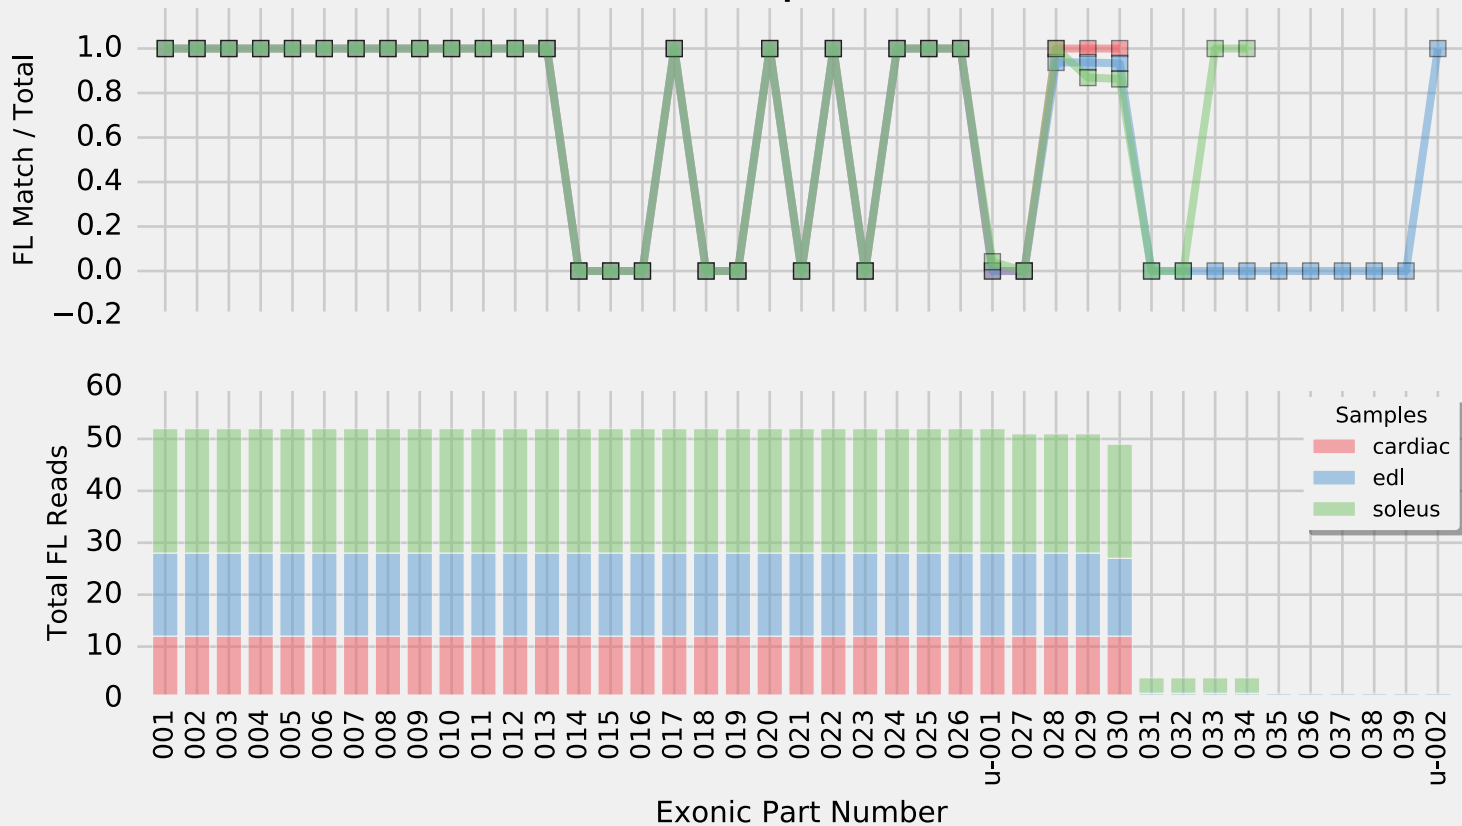

# Ssh2

FL Match / Total

1.0  
0.8  
0.6  
0.4  
0.2  
0.0  
-0.2

Total FL Reads

400  
350  
300  
250  
200  
150  
100  
50  
0

Samples

cardiac  
edl  
soleus

Exonic Part Number

001 002 003 004 005 006 007 008 009 010 011 012 013 014 015 016 017 018 019 020 021 022 023 024 025 026 027

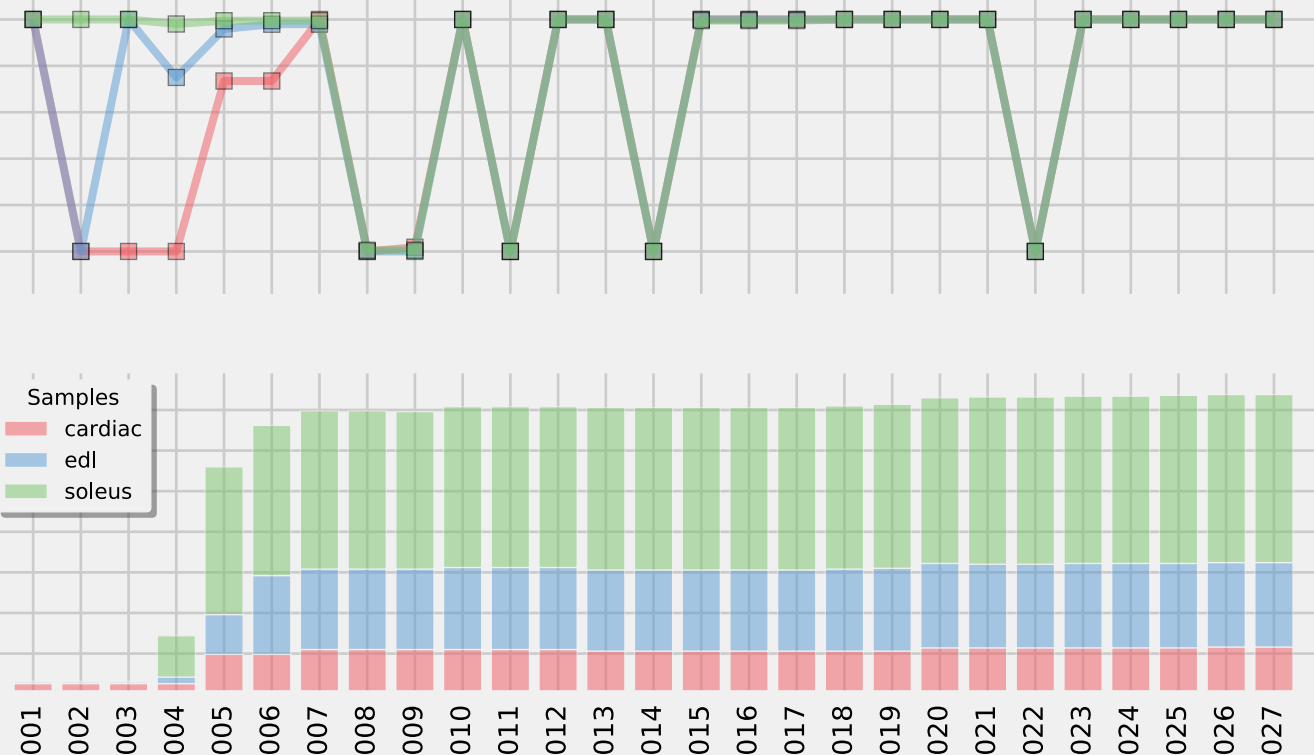

# Stag1

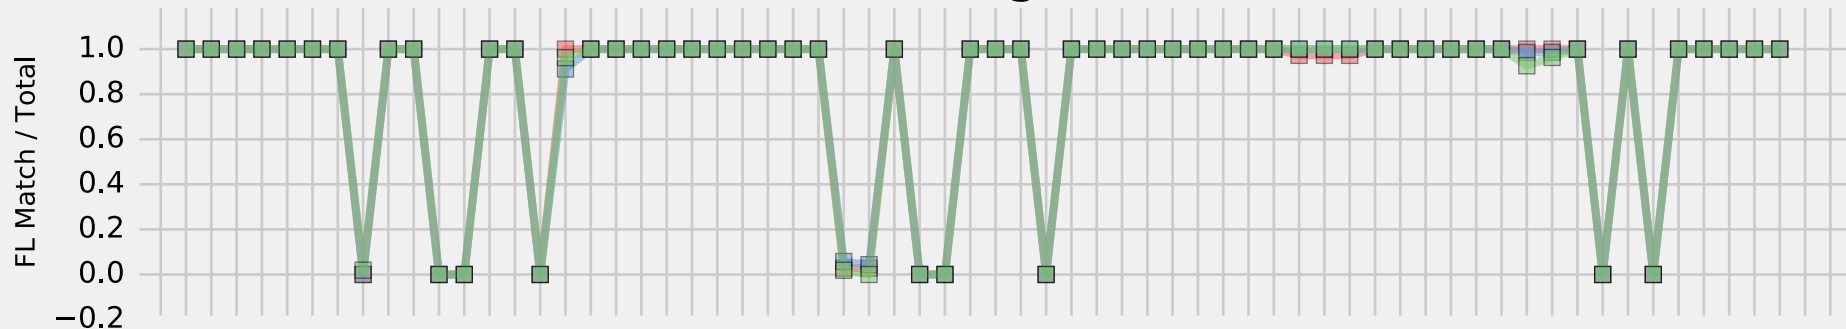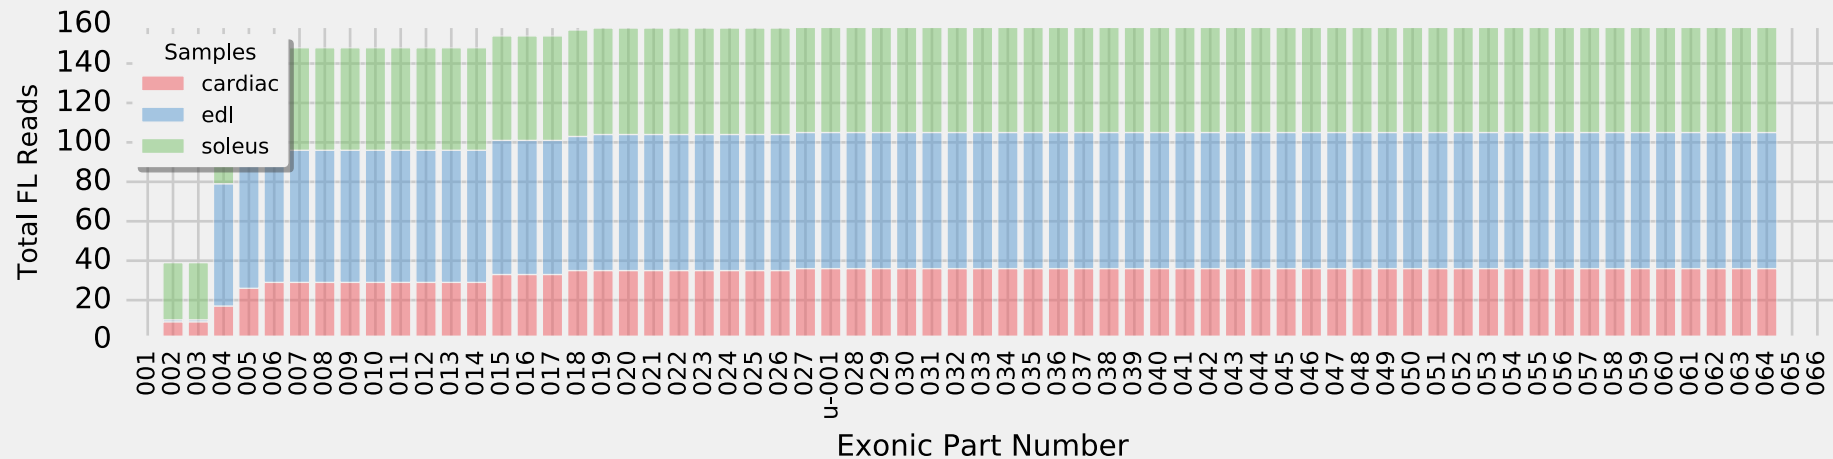

# Stag2

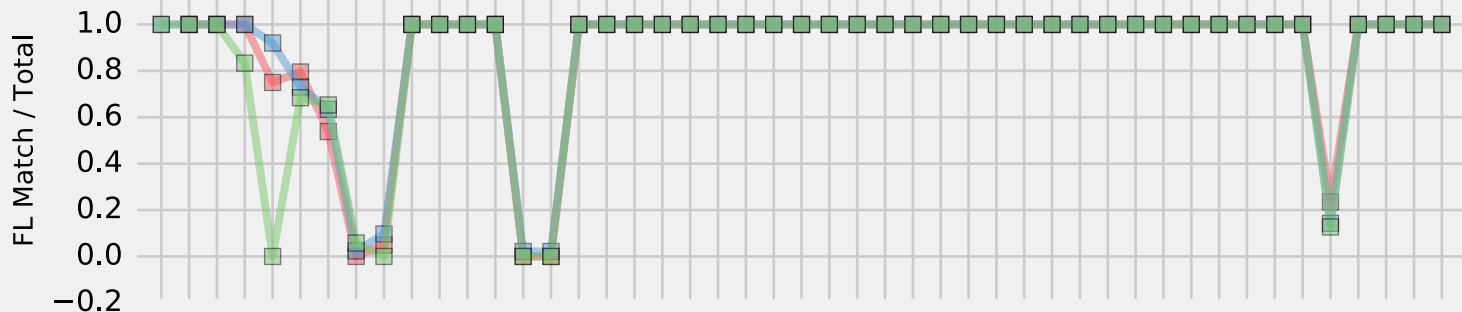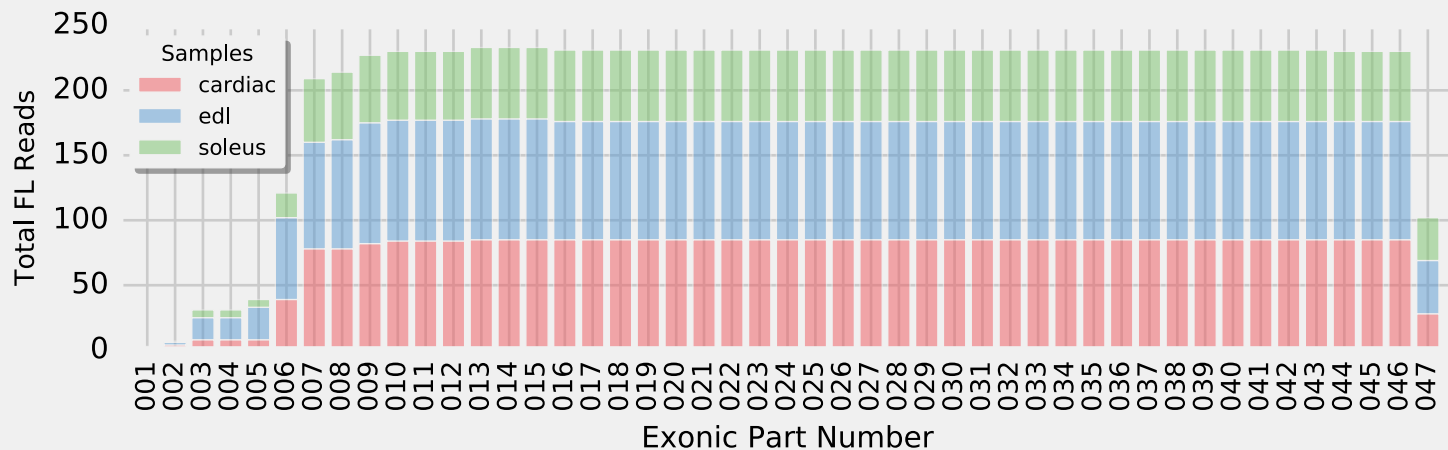

# Stat5b

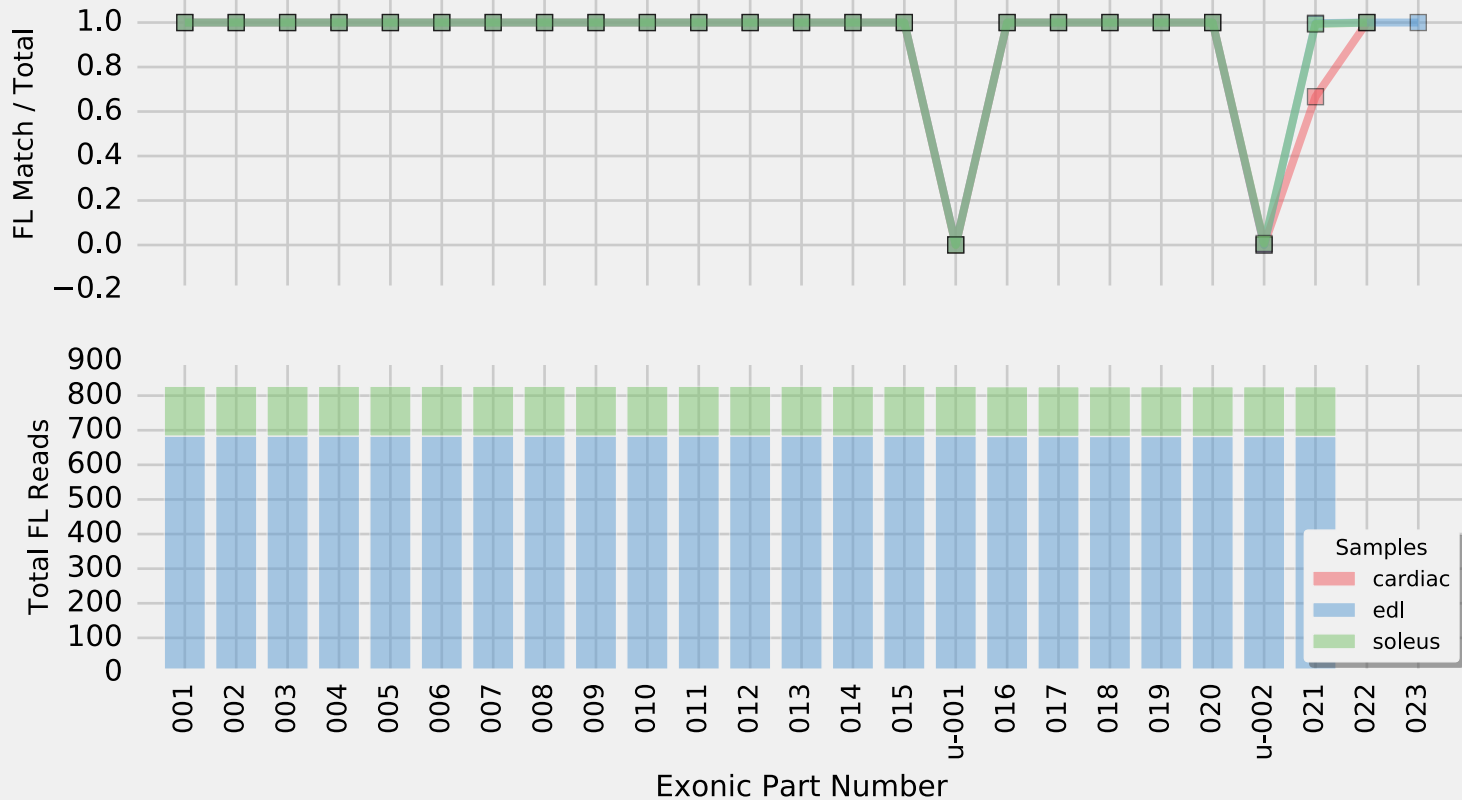

# Ston2

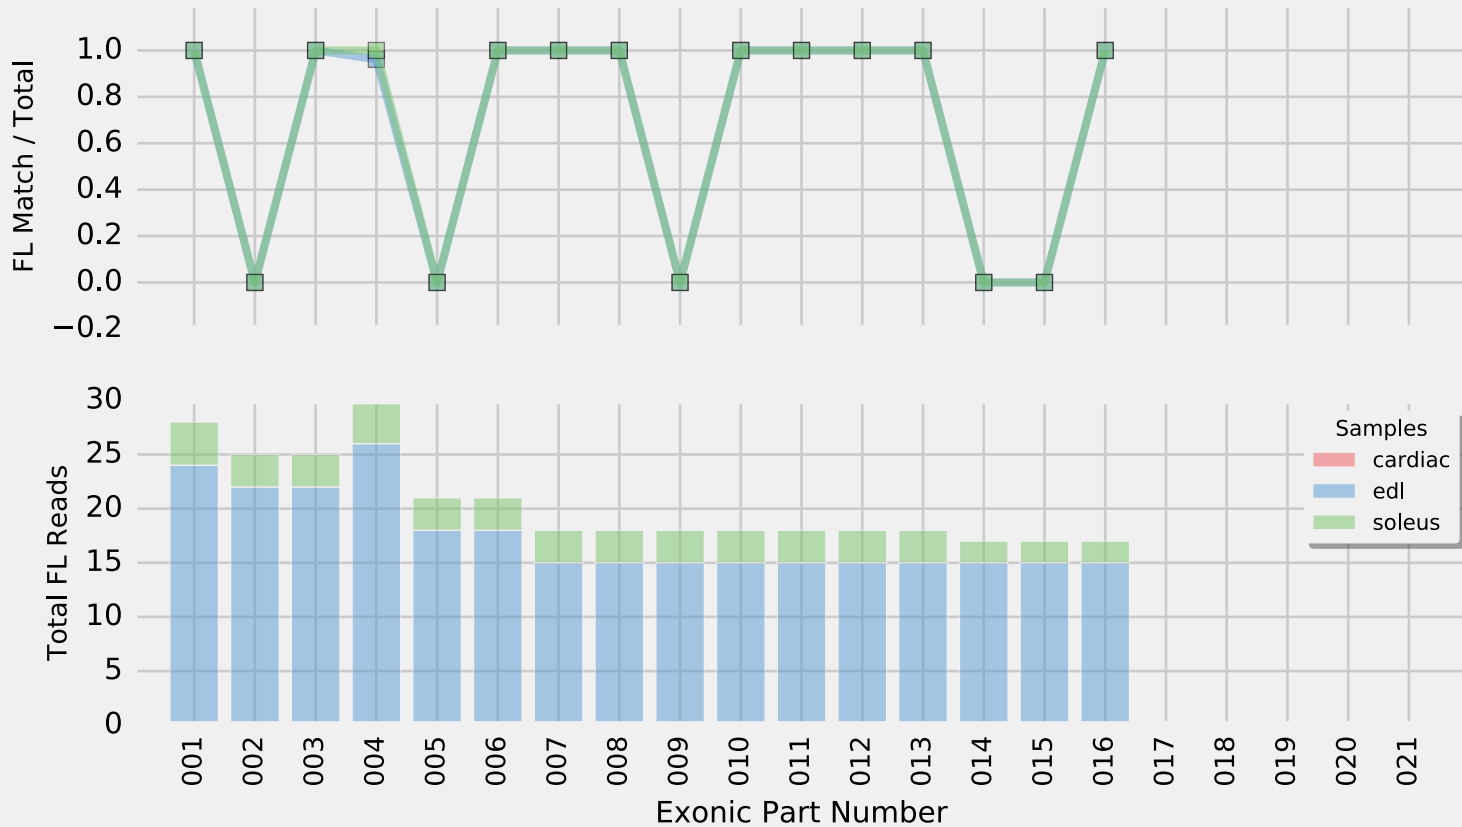



# Strip2

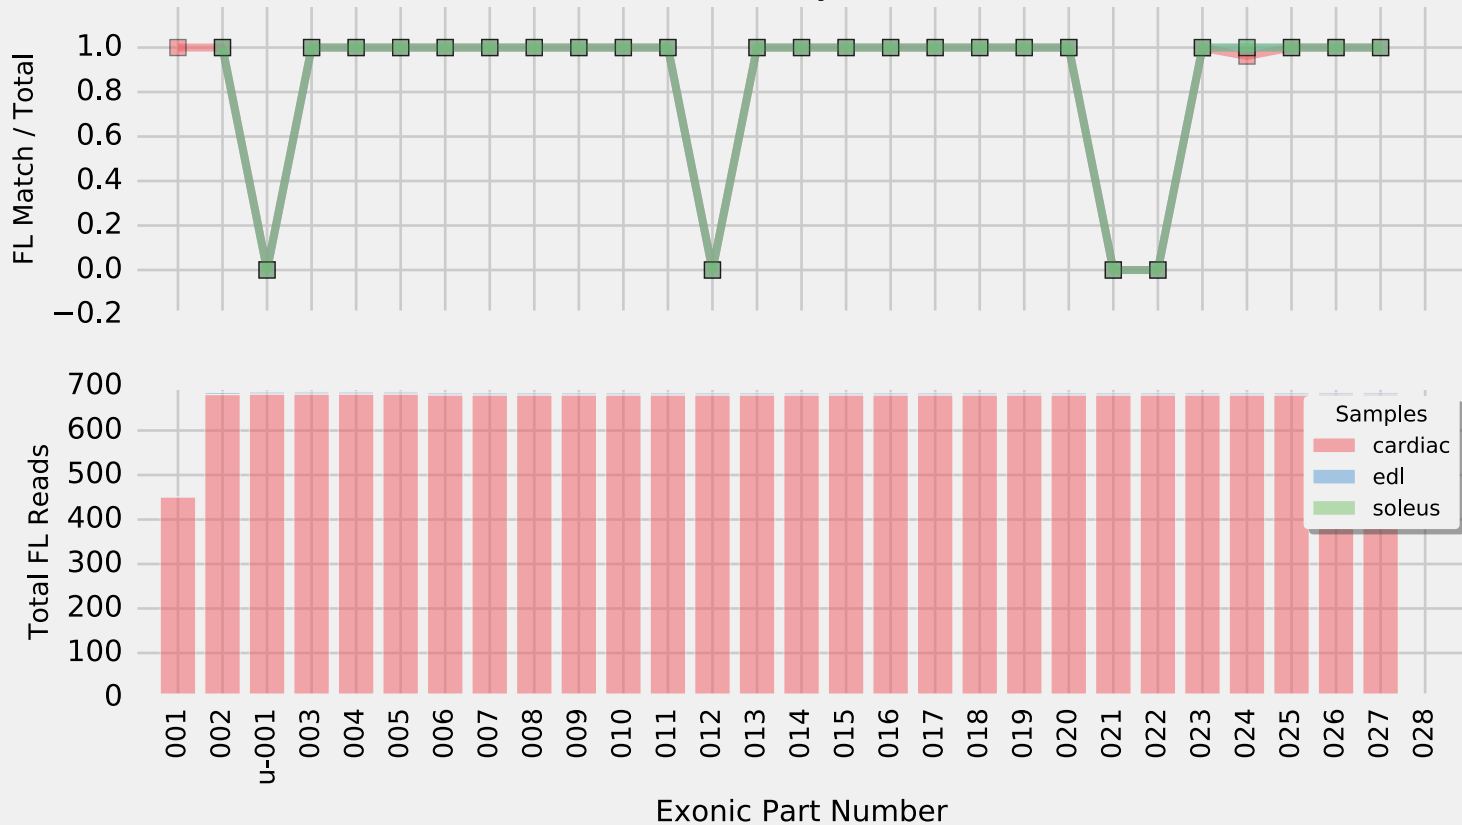

# Strn

FL Match / Total

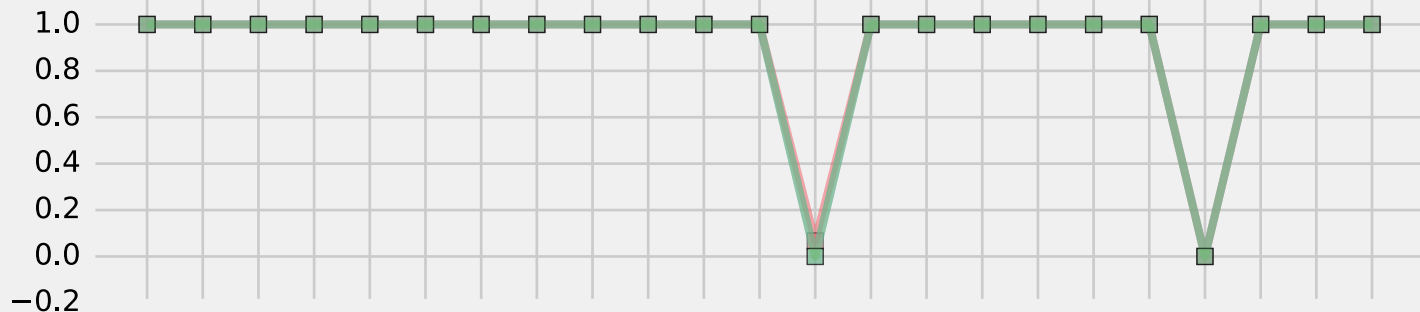

Total FL Reads

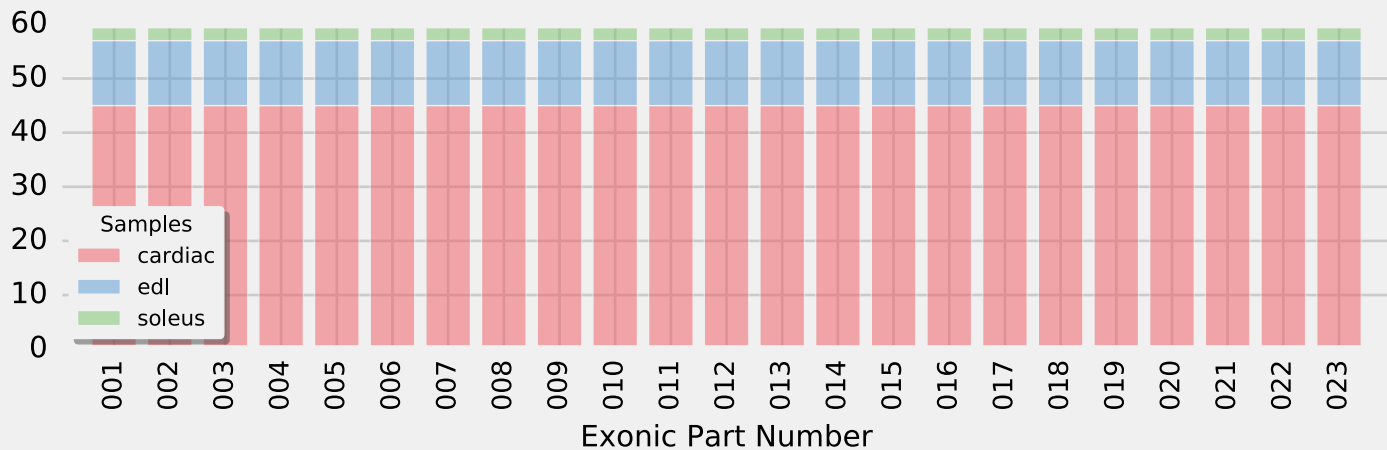

# Stx17

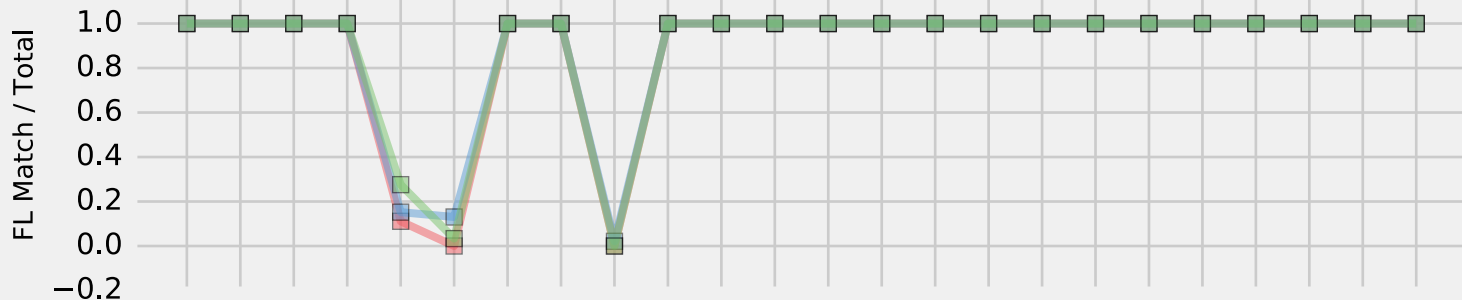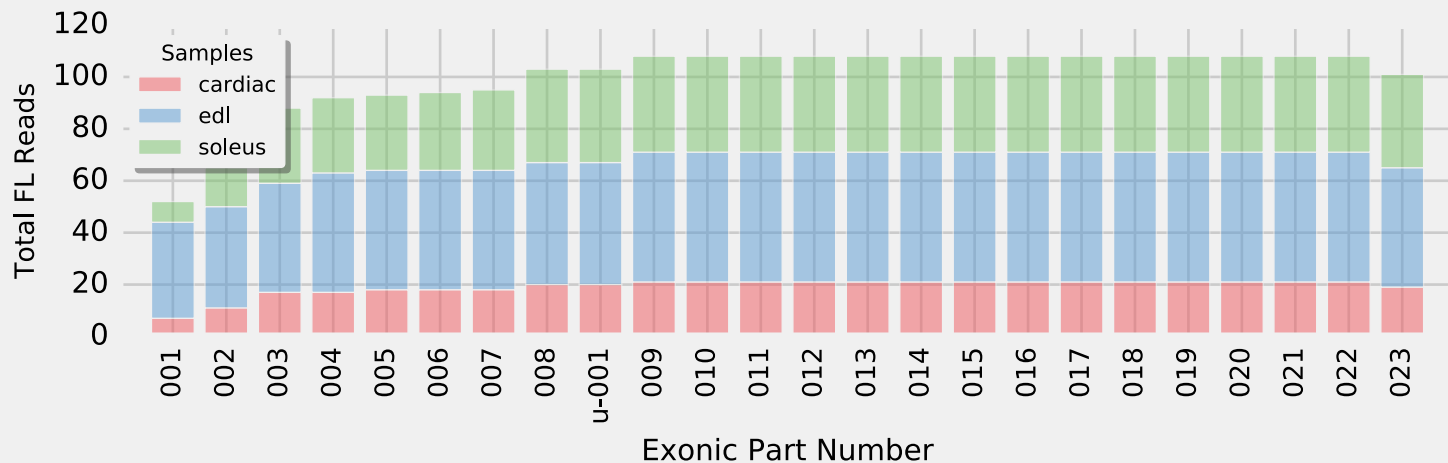

# Suco

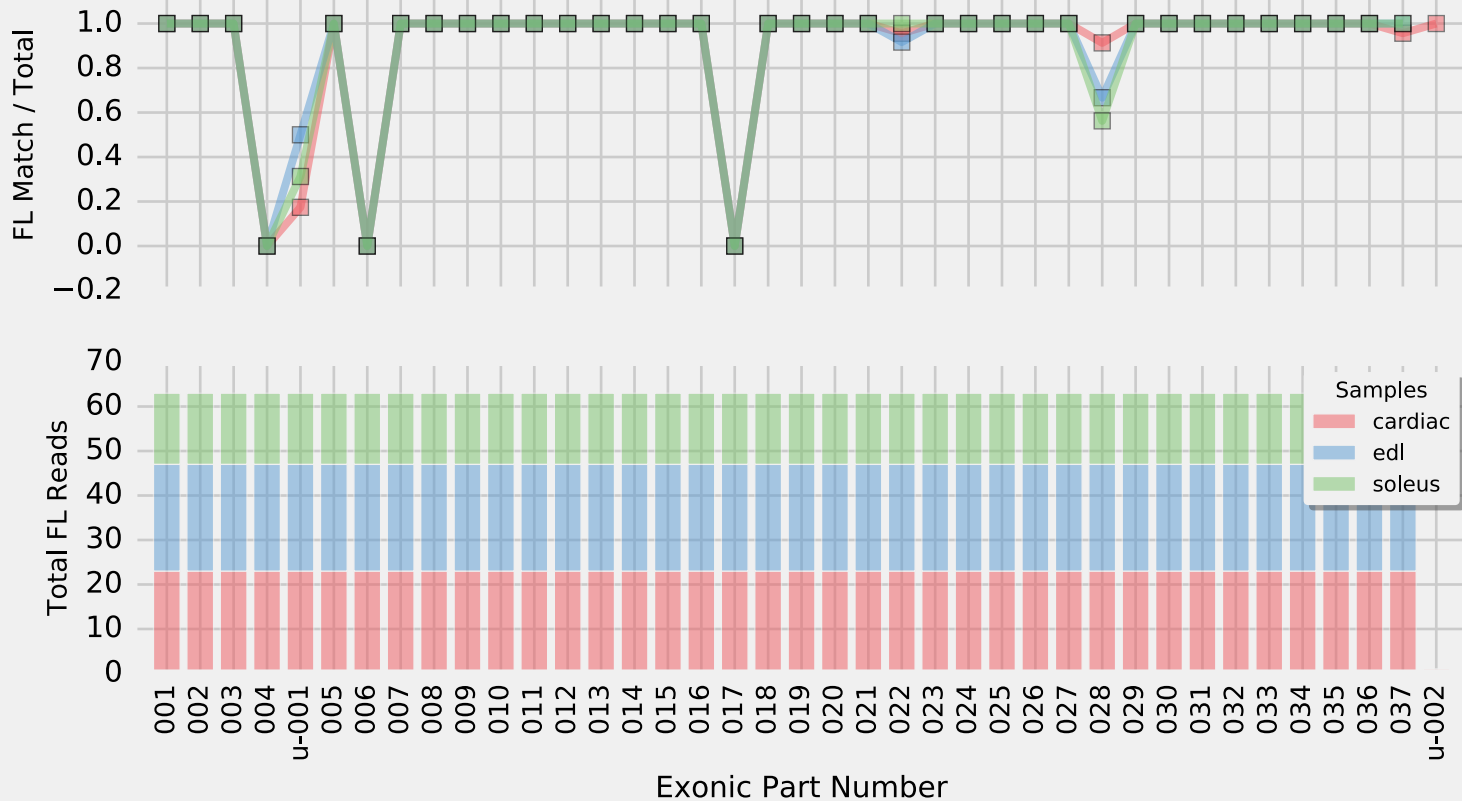

# Sulf1

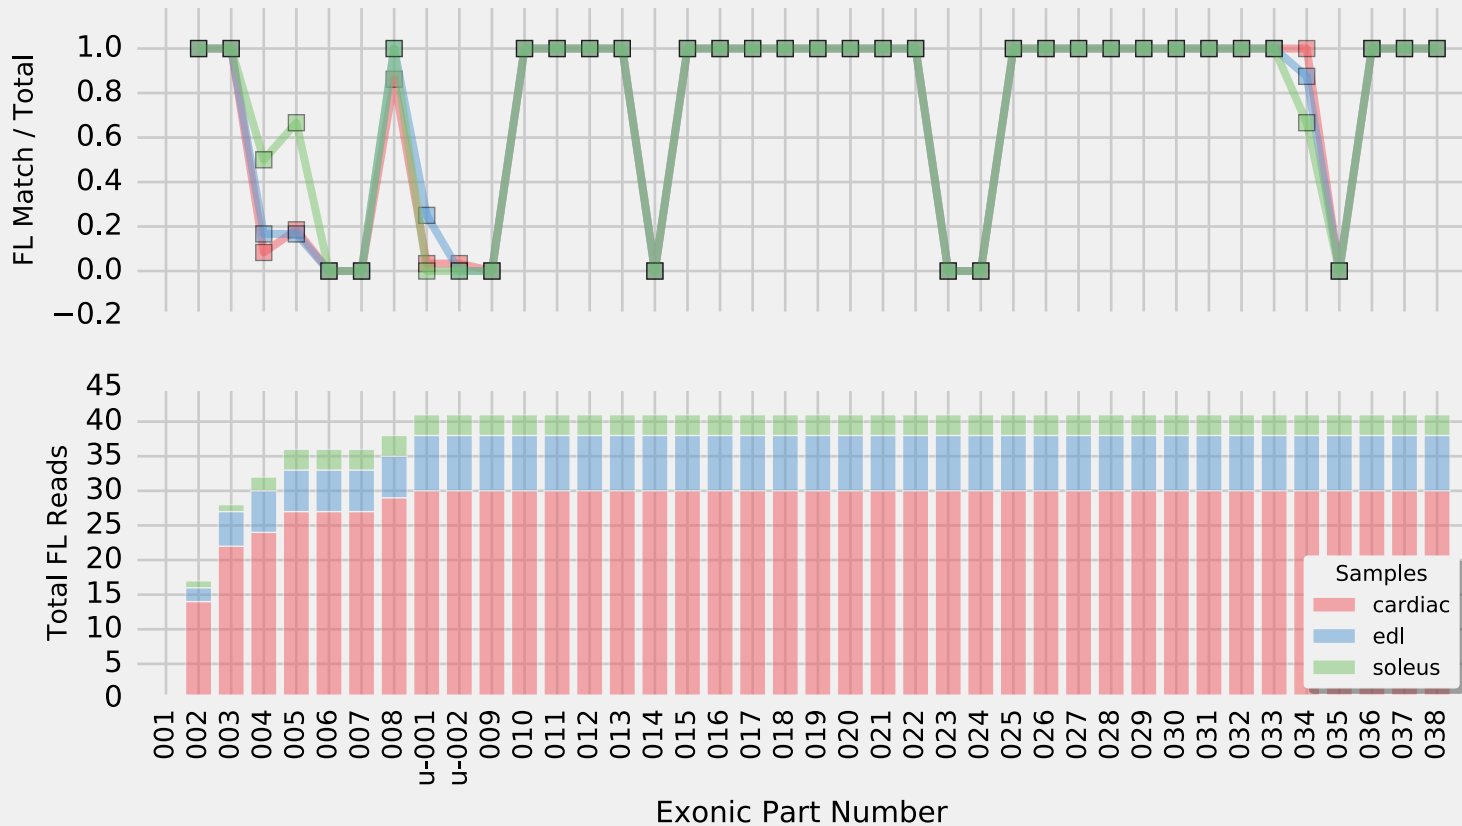

# Supt6

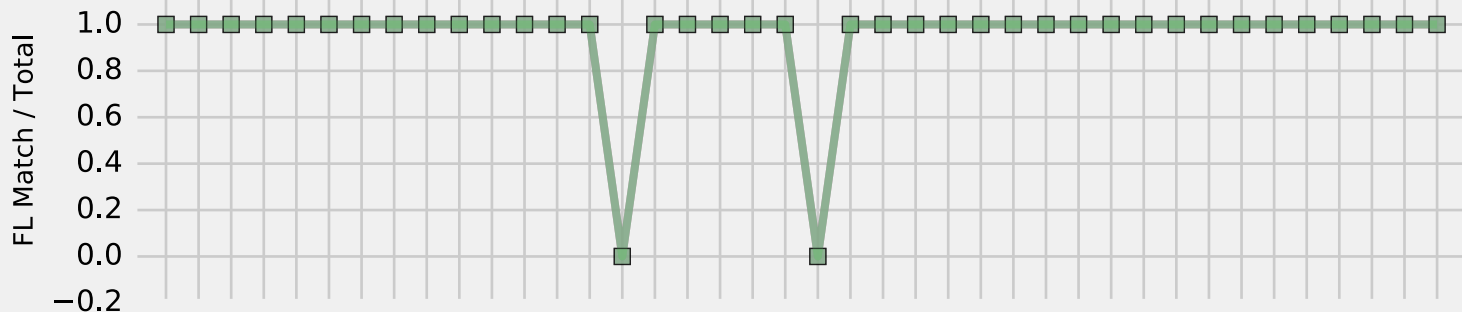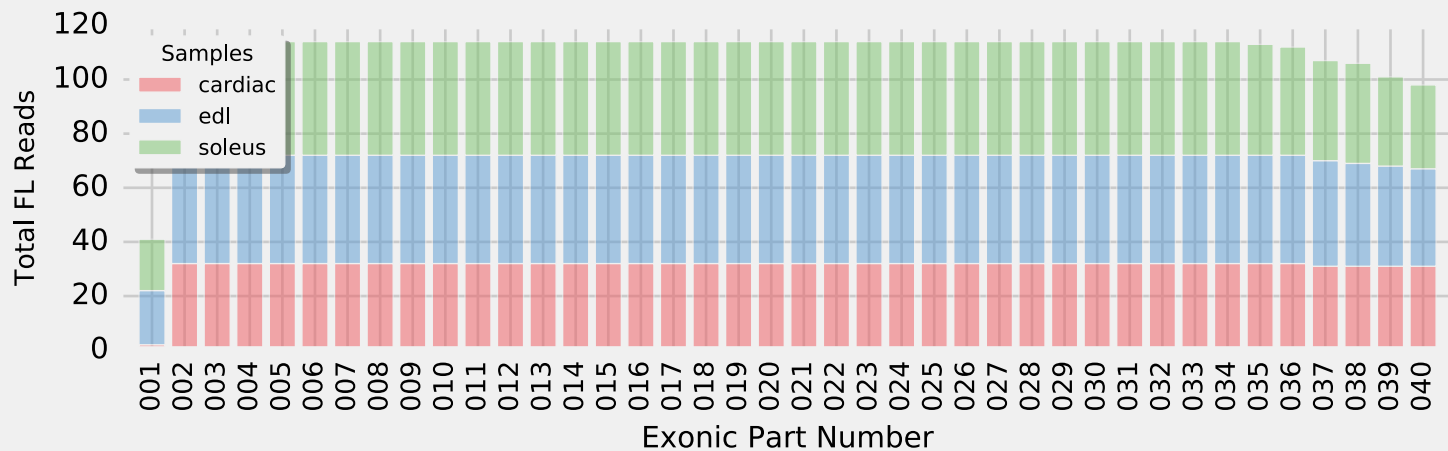

# Suv420h1

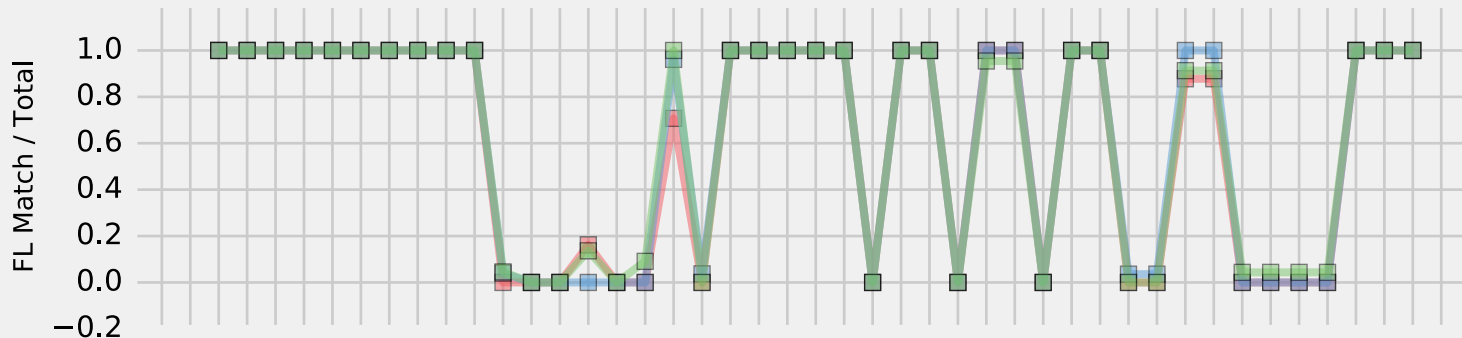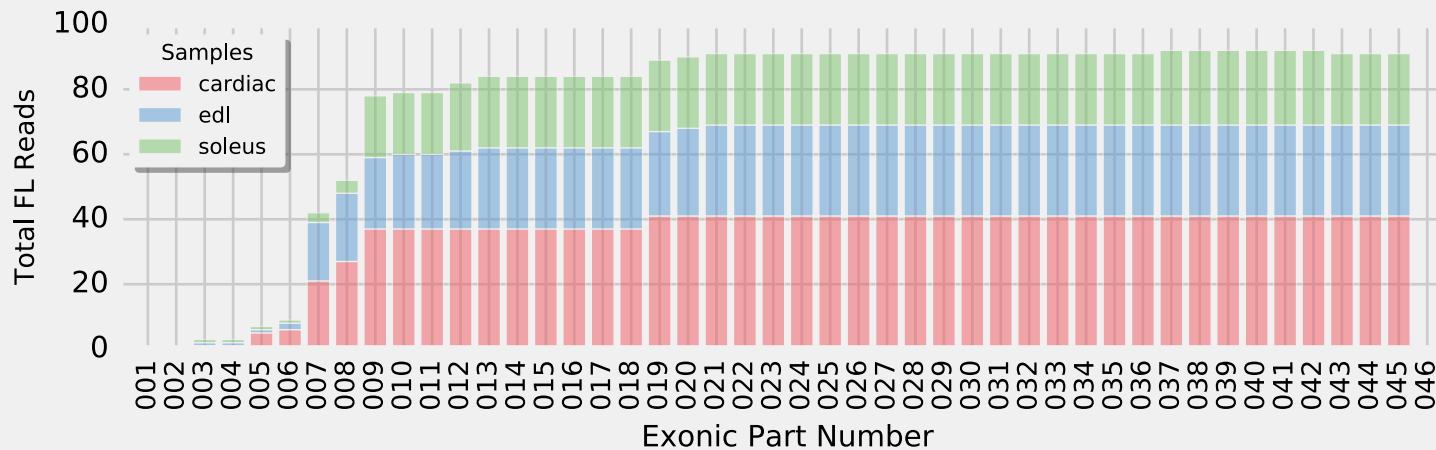

# Svil

FL Match / Total

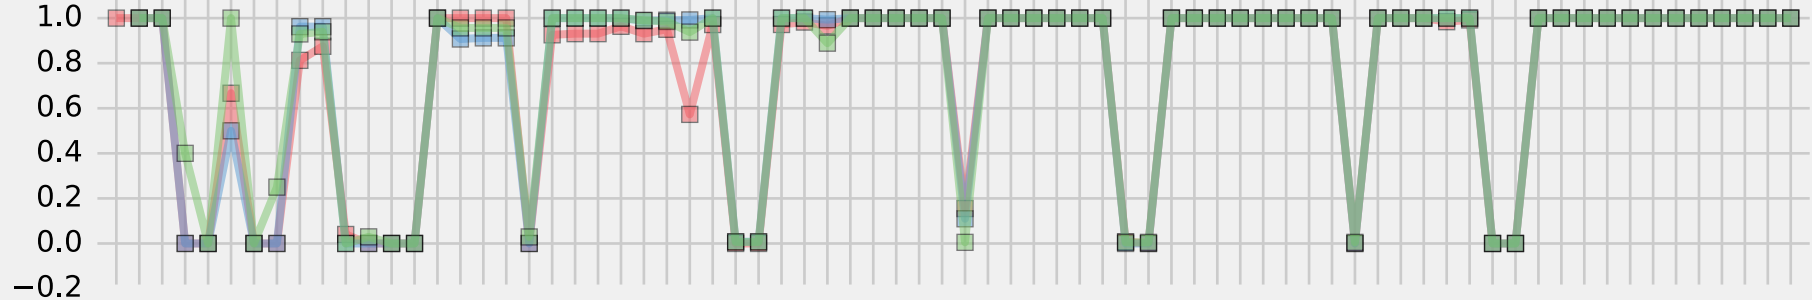

Total FL Reads

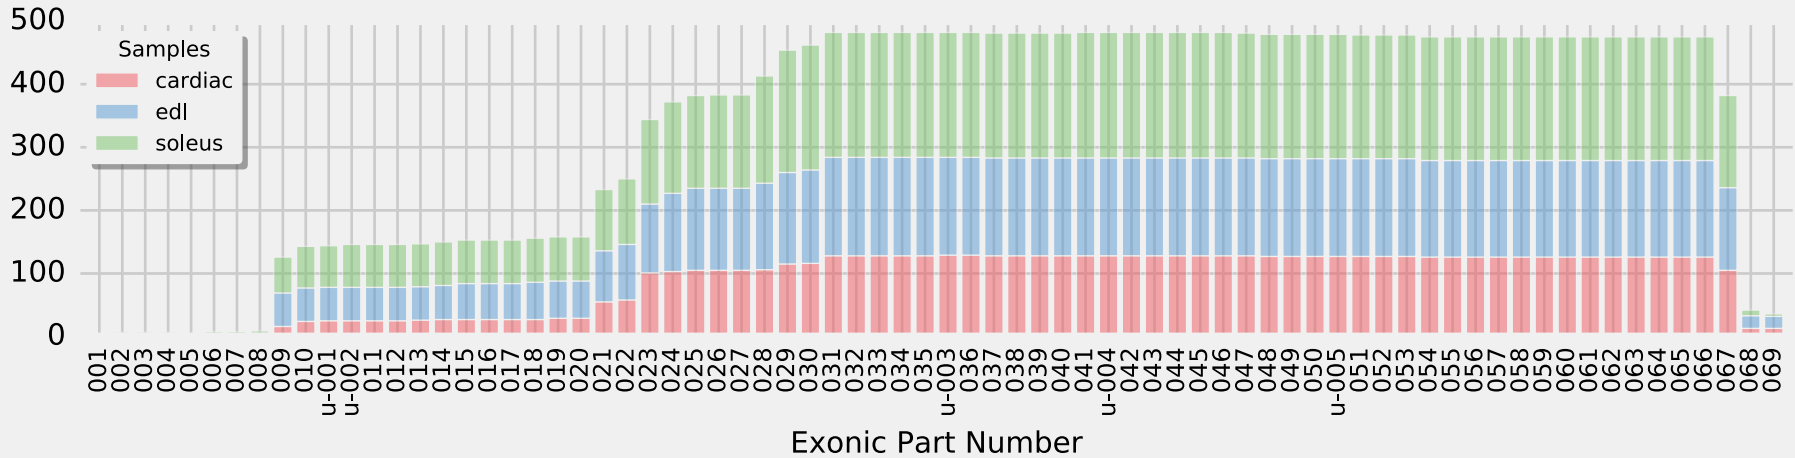



# Synj2

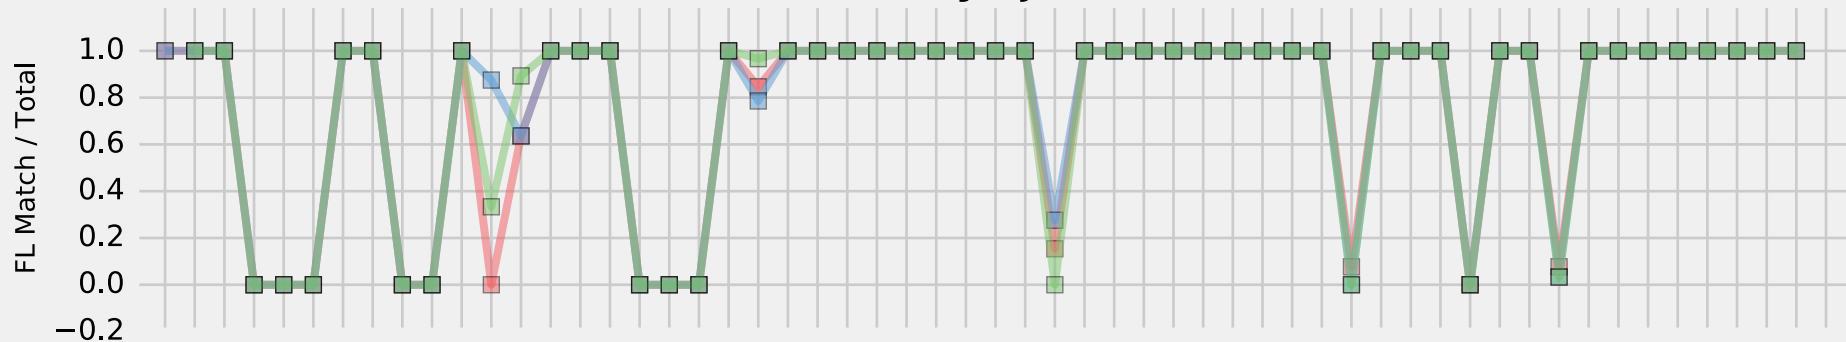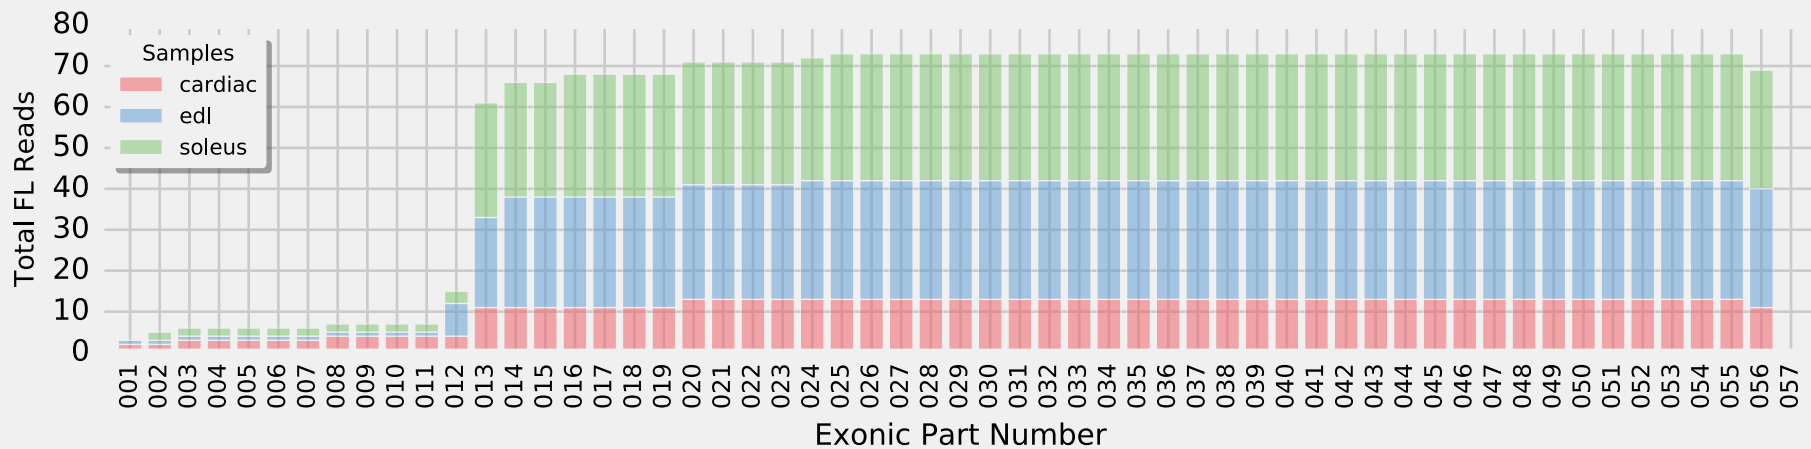

# Synm

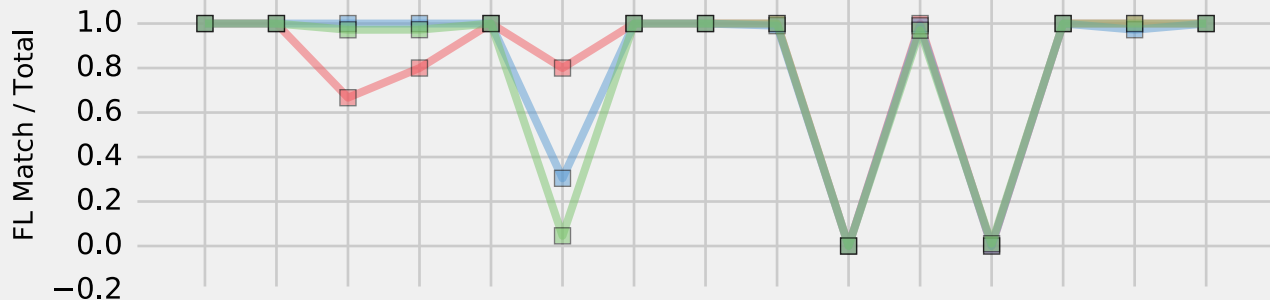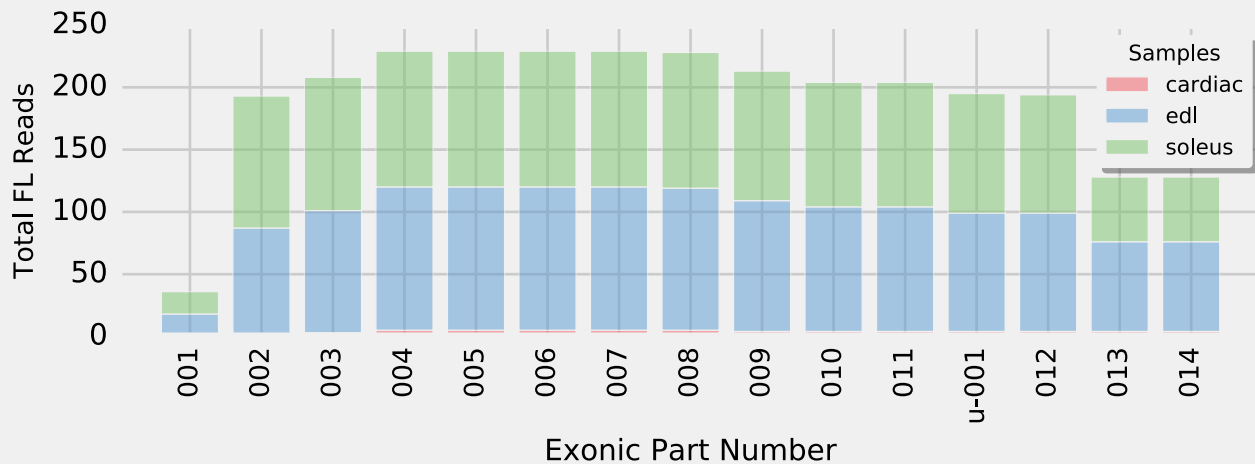

# Tacc2

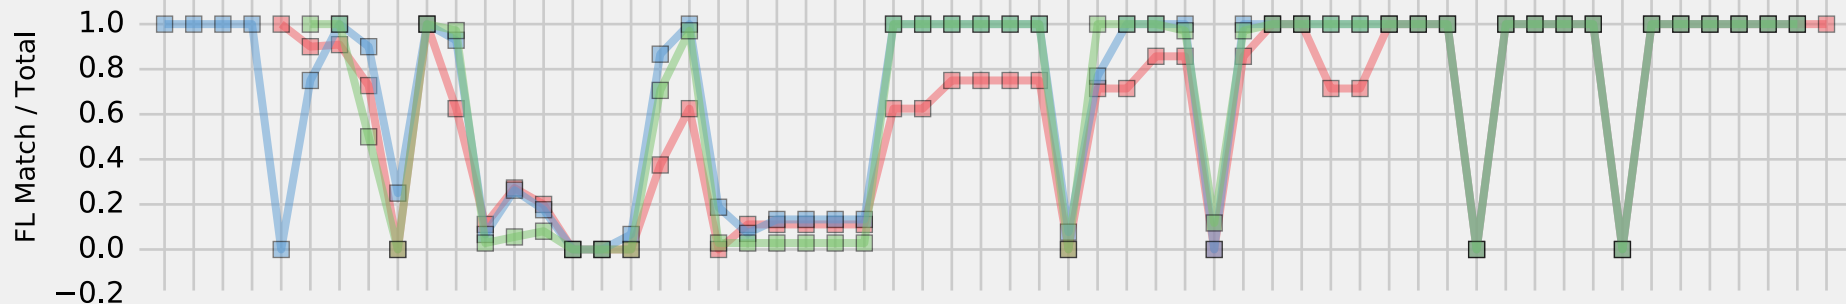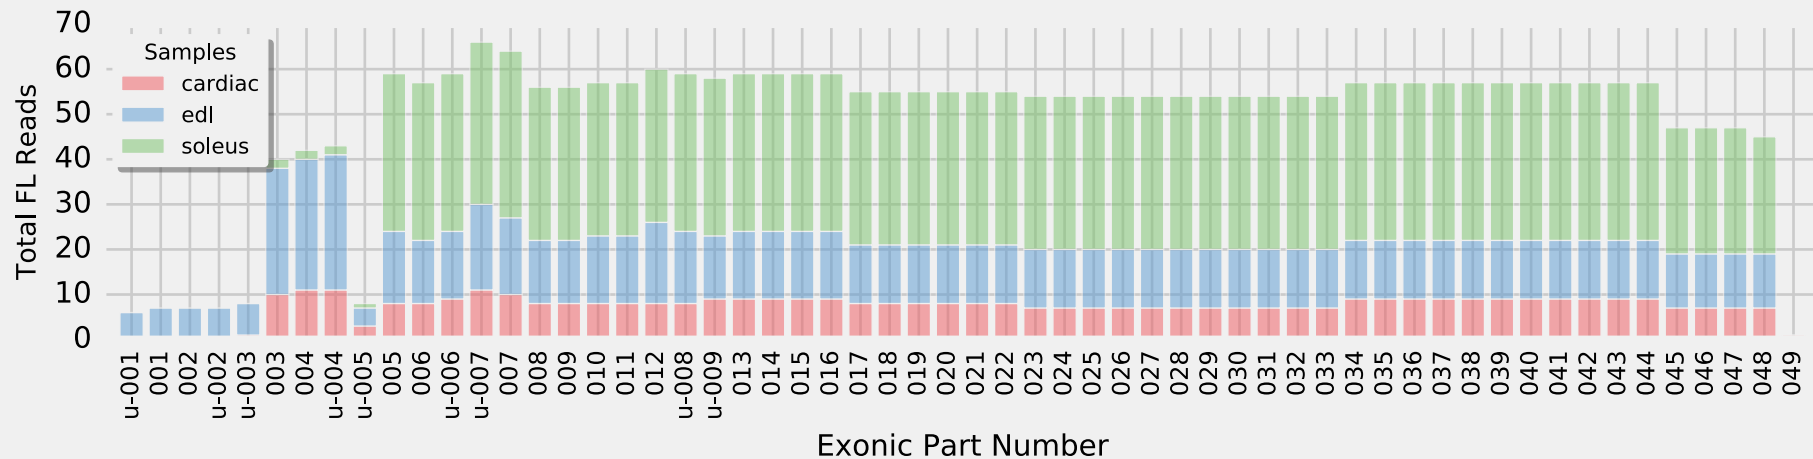

# Taf1

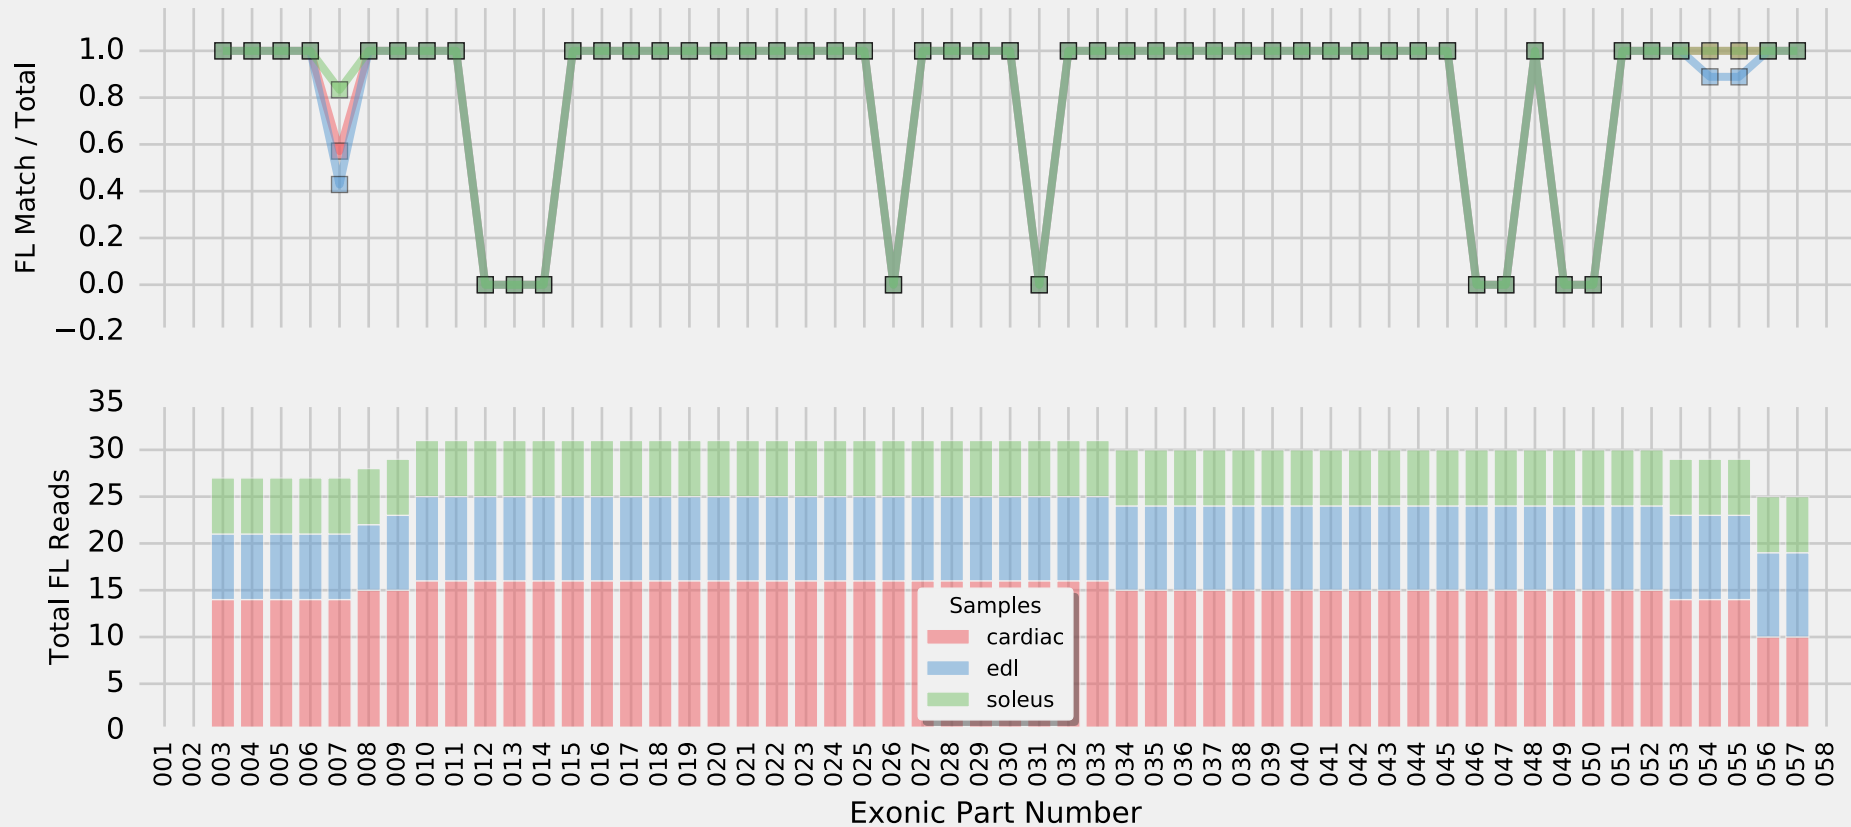

# Taok1

FL Match / Total

1.0  
0.8  
0.6  
0.4  
0.2  
0.0  
-0.2

Total FL Reads

60  
50  
40  
30  
20  
10  
0

Samples

cardiac

edl

soleus

Exonic Part Number

001 002 003 004 005 006 007 008 009 010 011 012 013 014 015 016 017 018 019 020 021

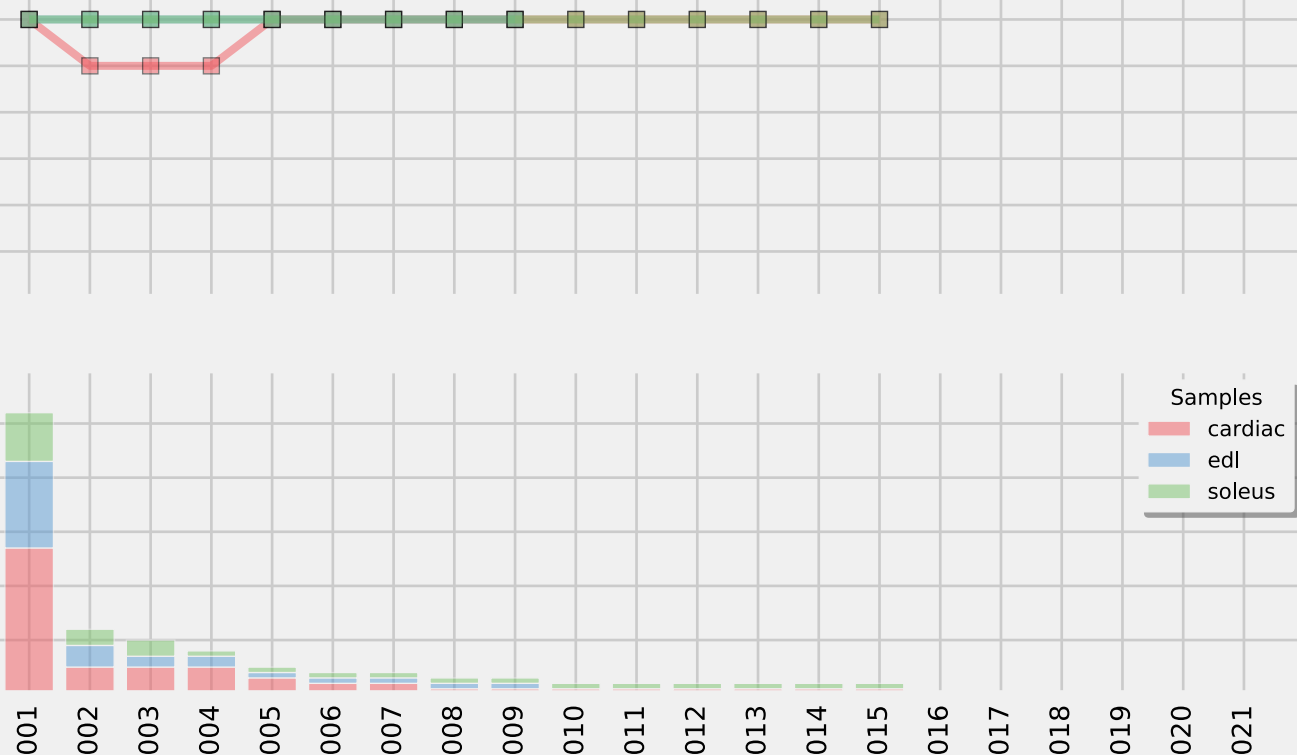

# Tbc1d1

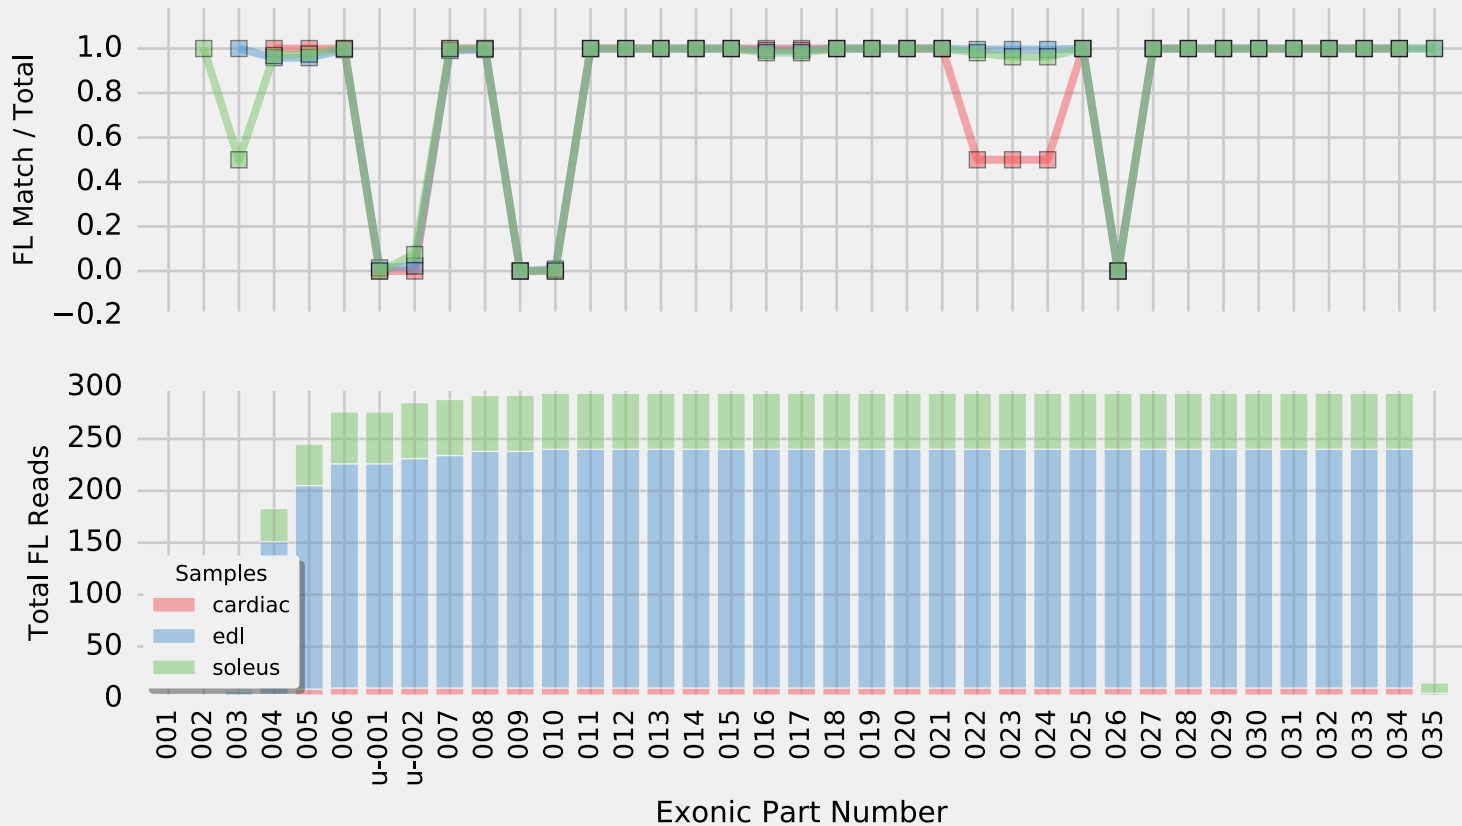

# Tbc1d4

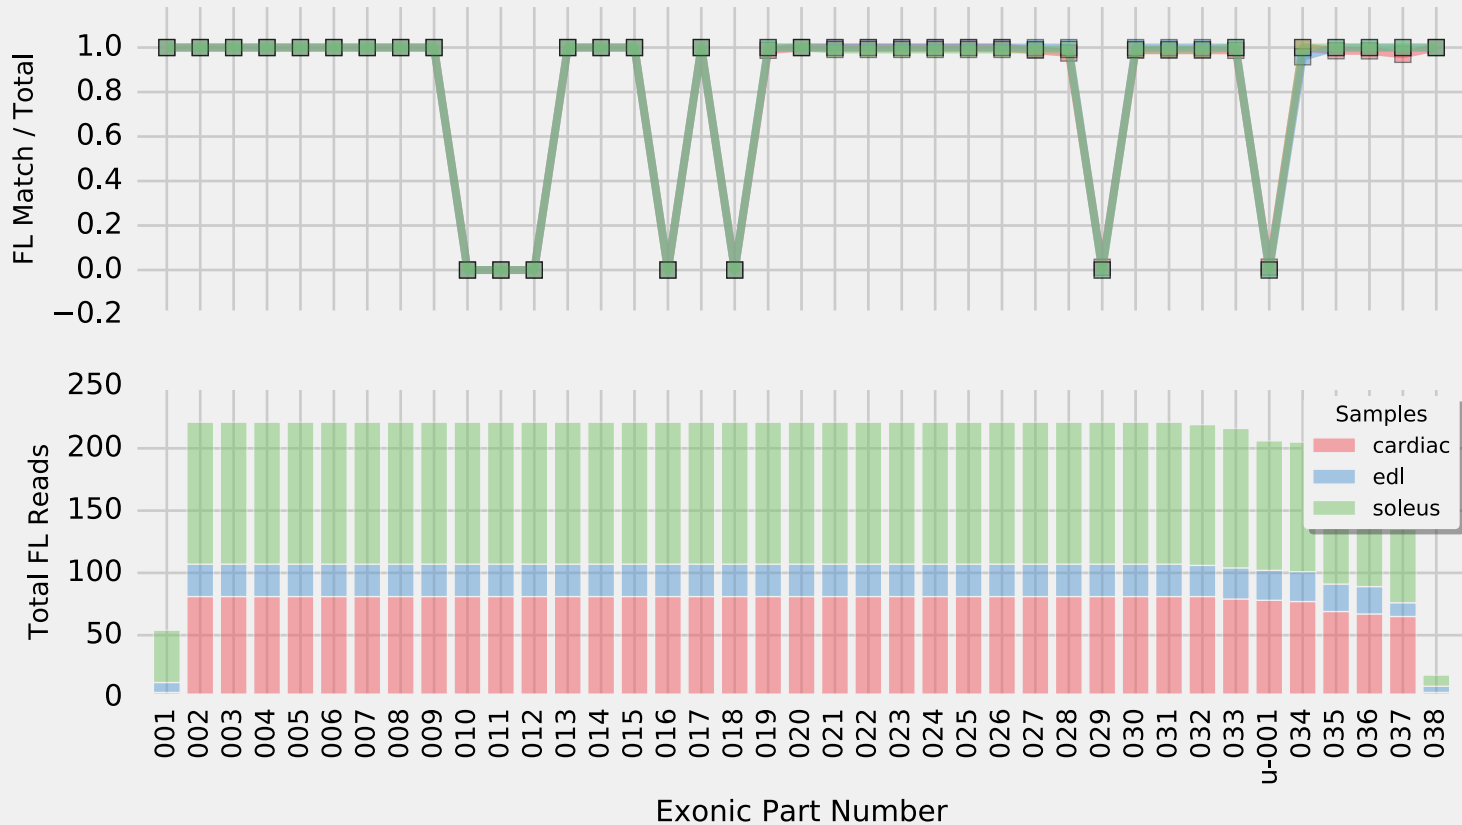

# Tbl1xr1

FL Match / Total

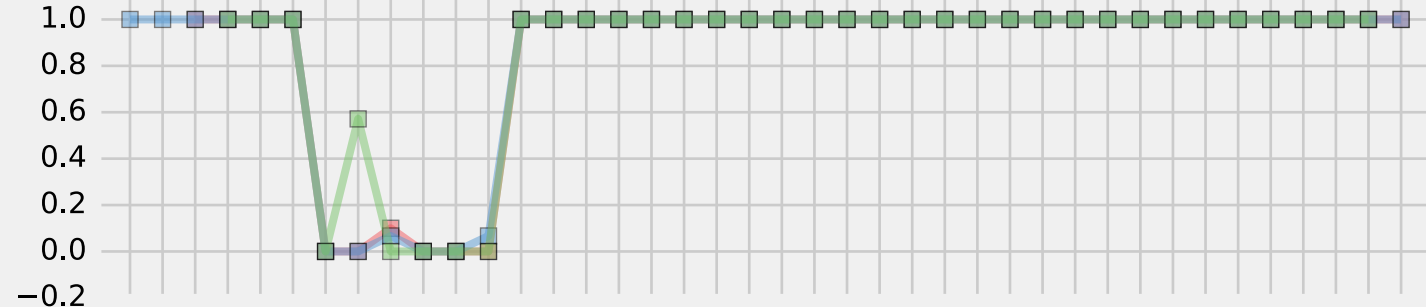

Total FL Reads

Samples

- cardiac
- edl
- soleus

Exonic Part Number

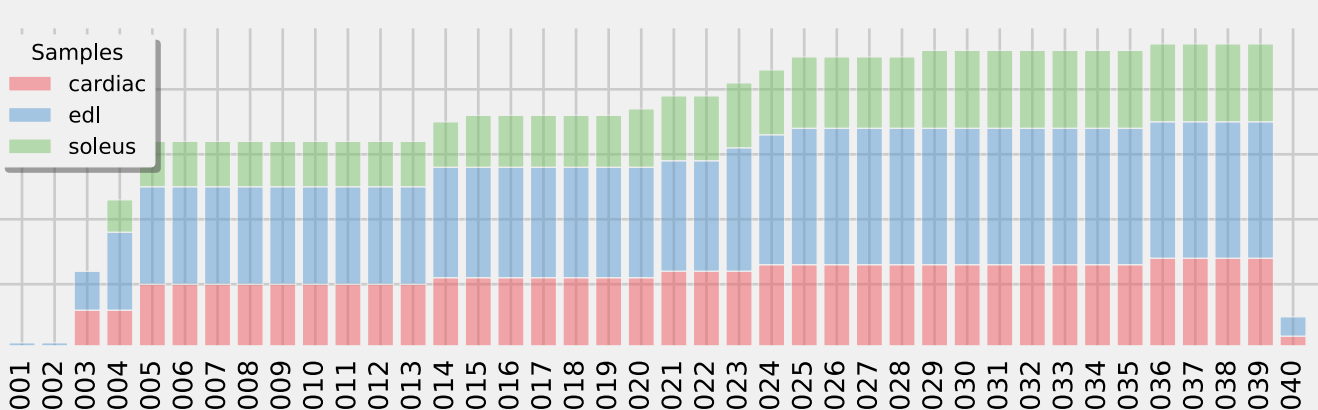



# Tbx20

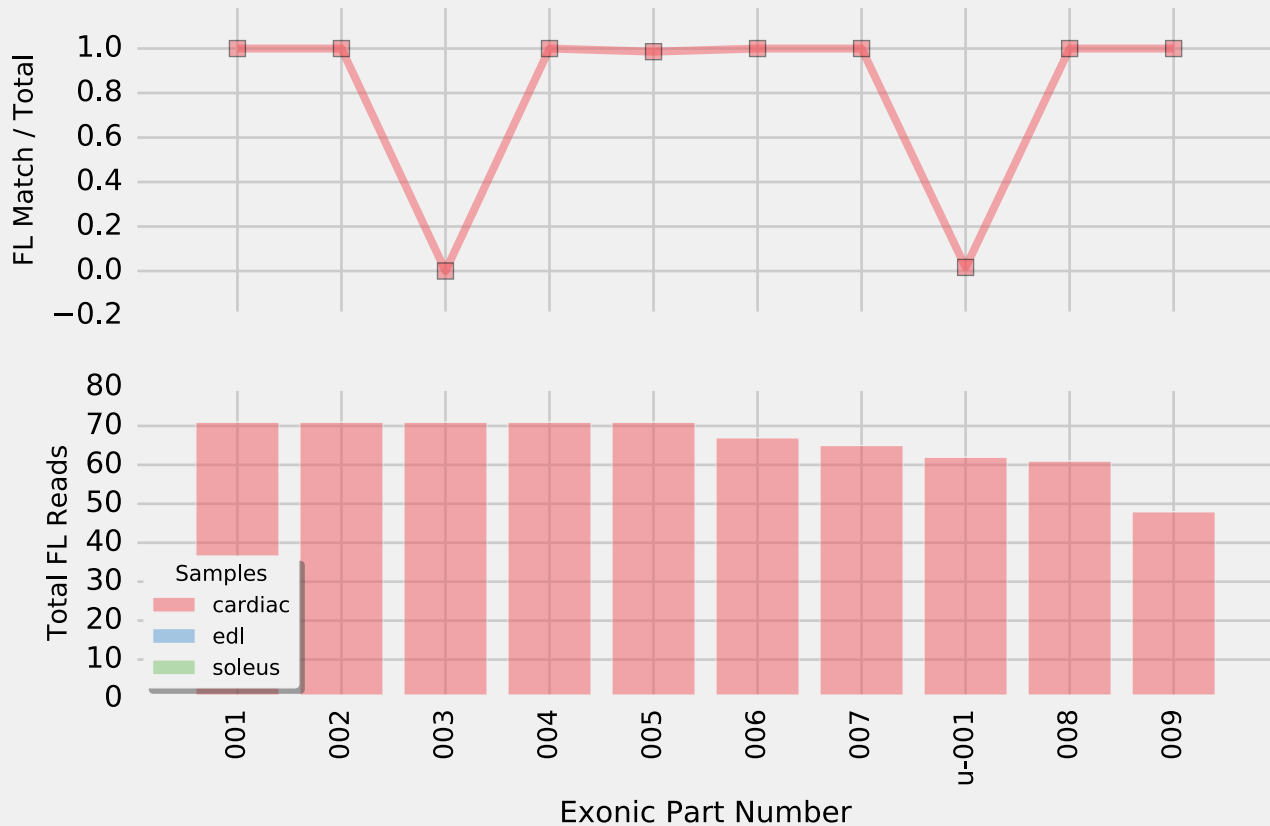

# Tdrd3

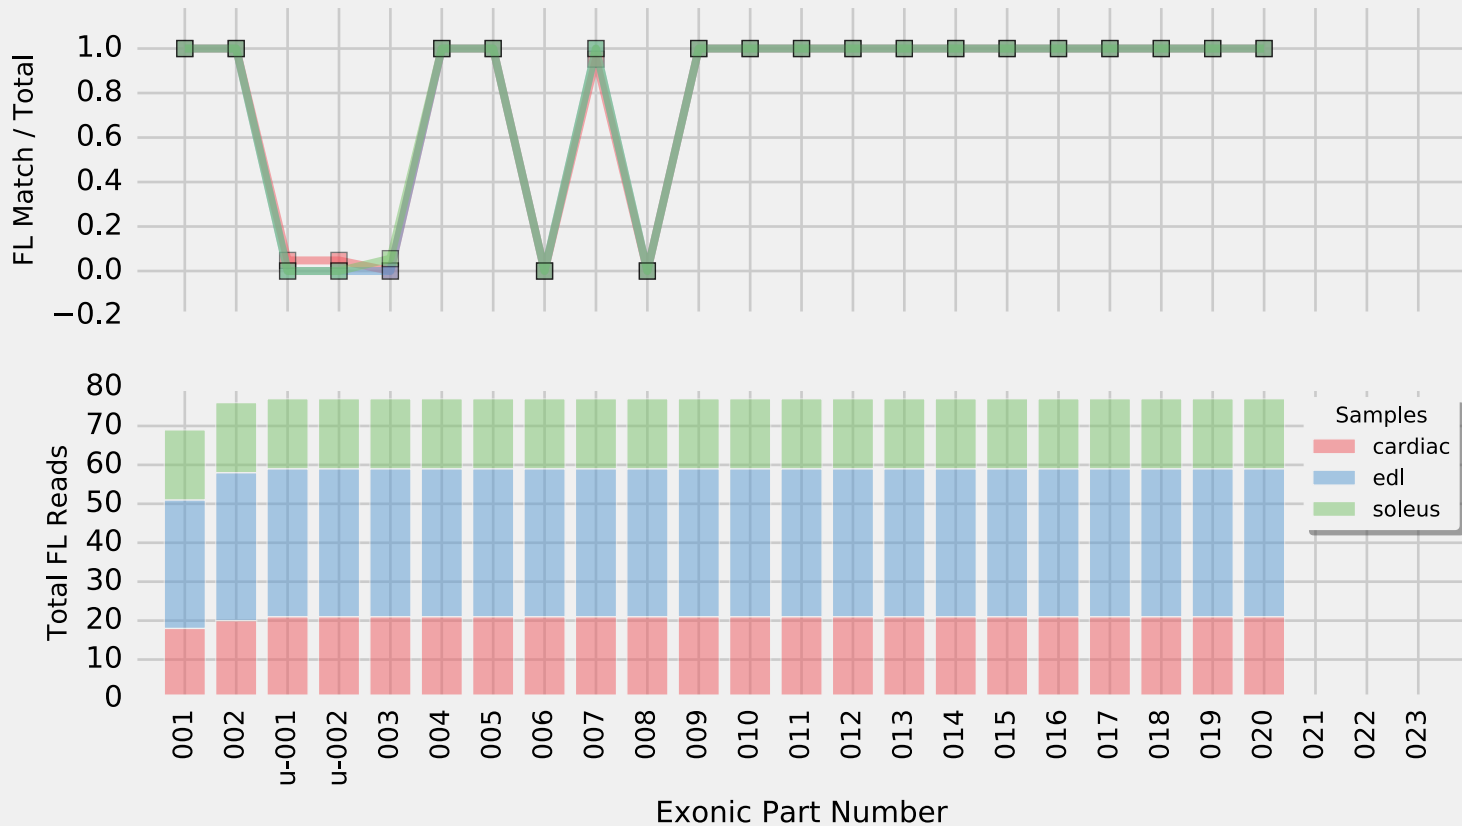

# Tfdp2

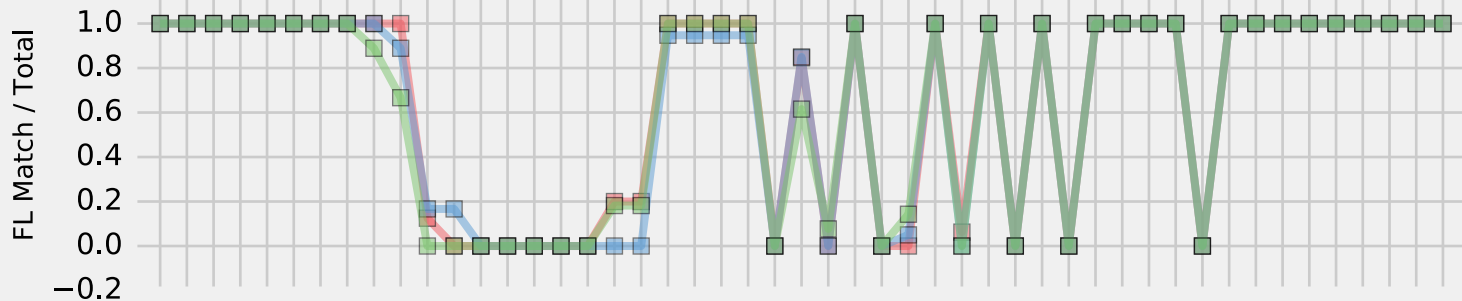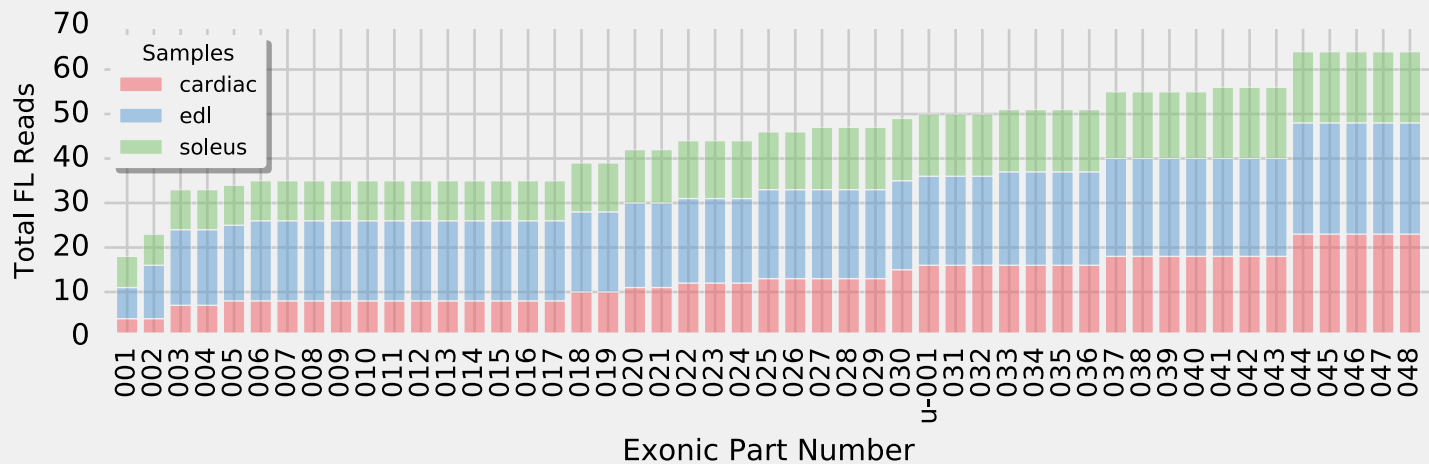

# Tgfr1

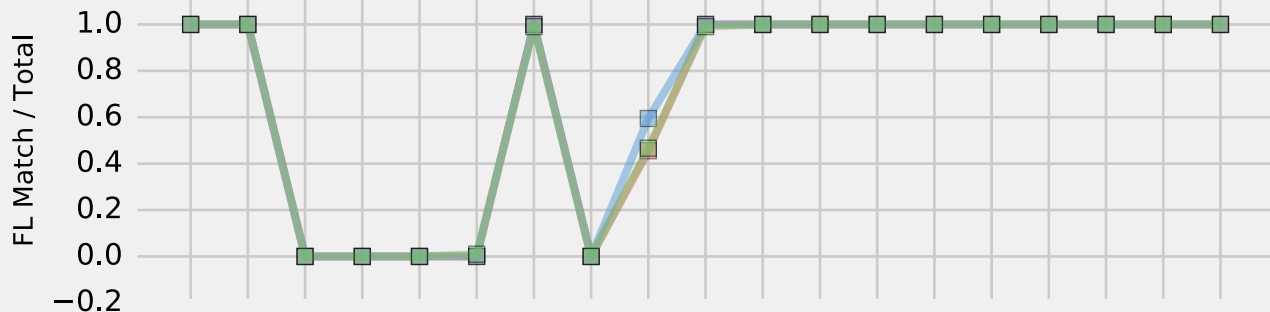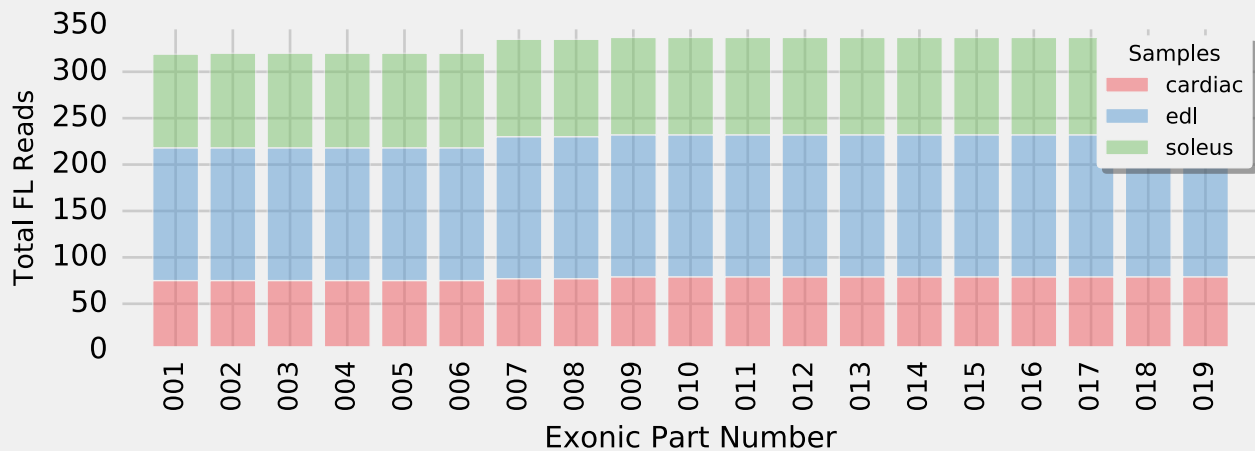

# Thbs2

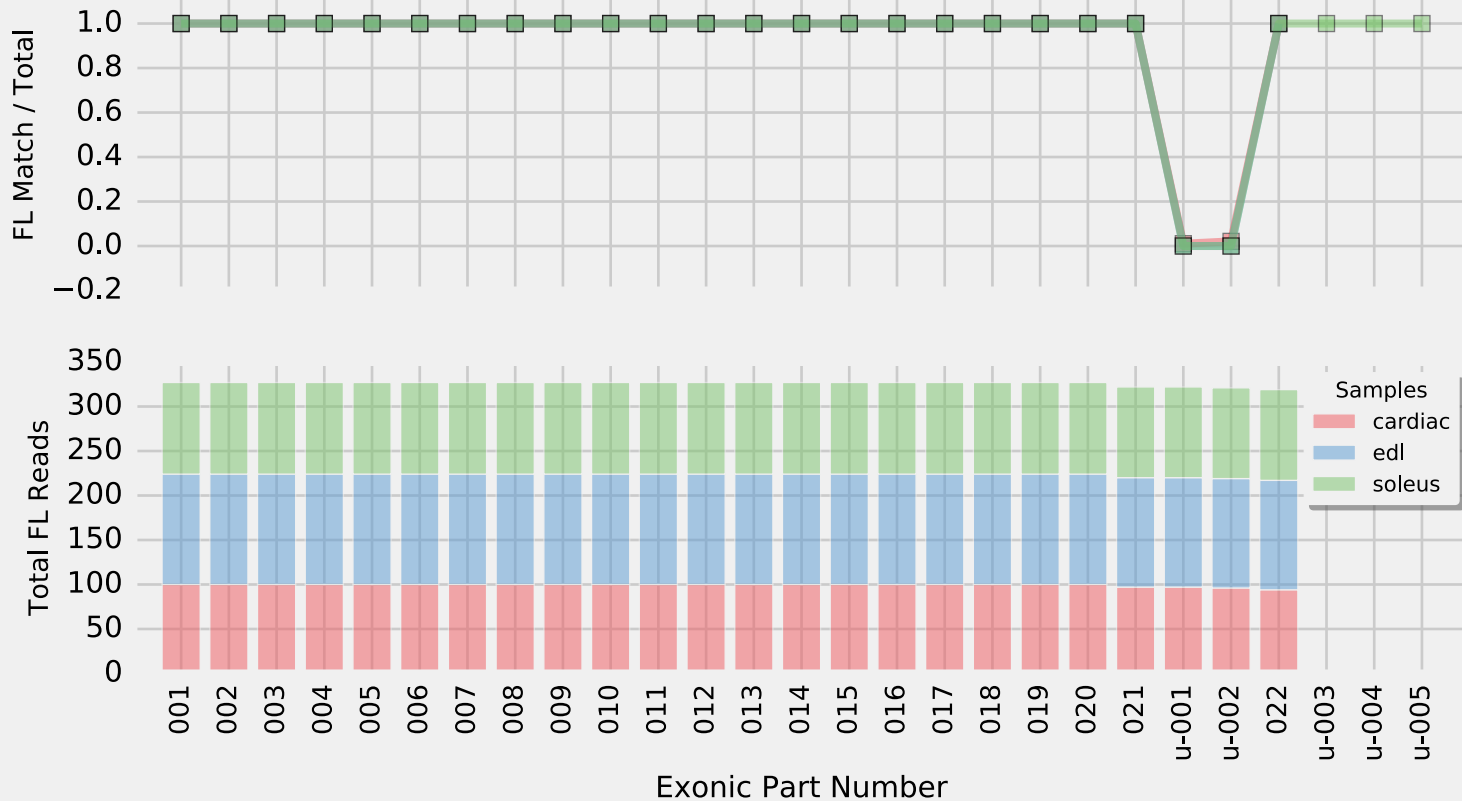

# Tln1

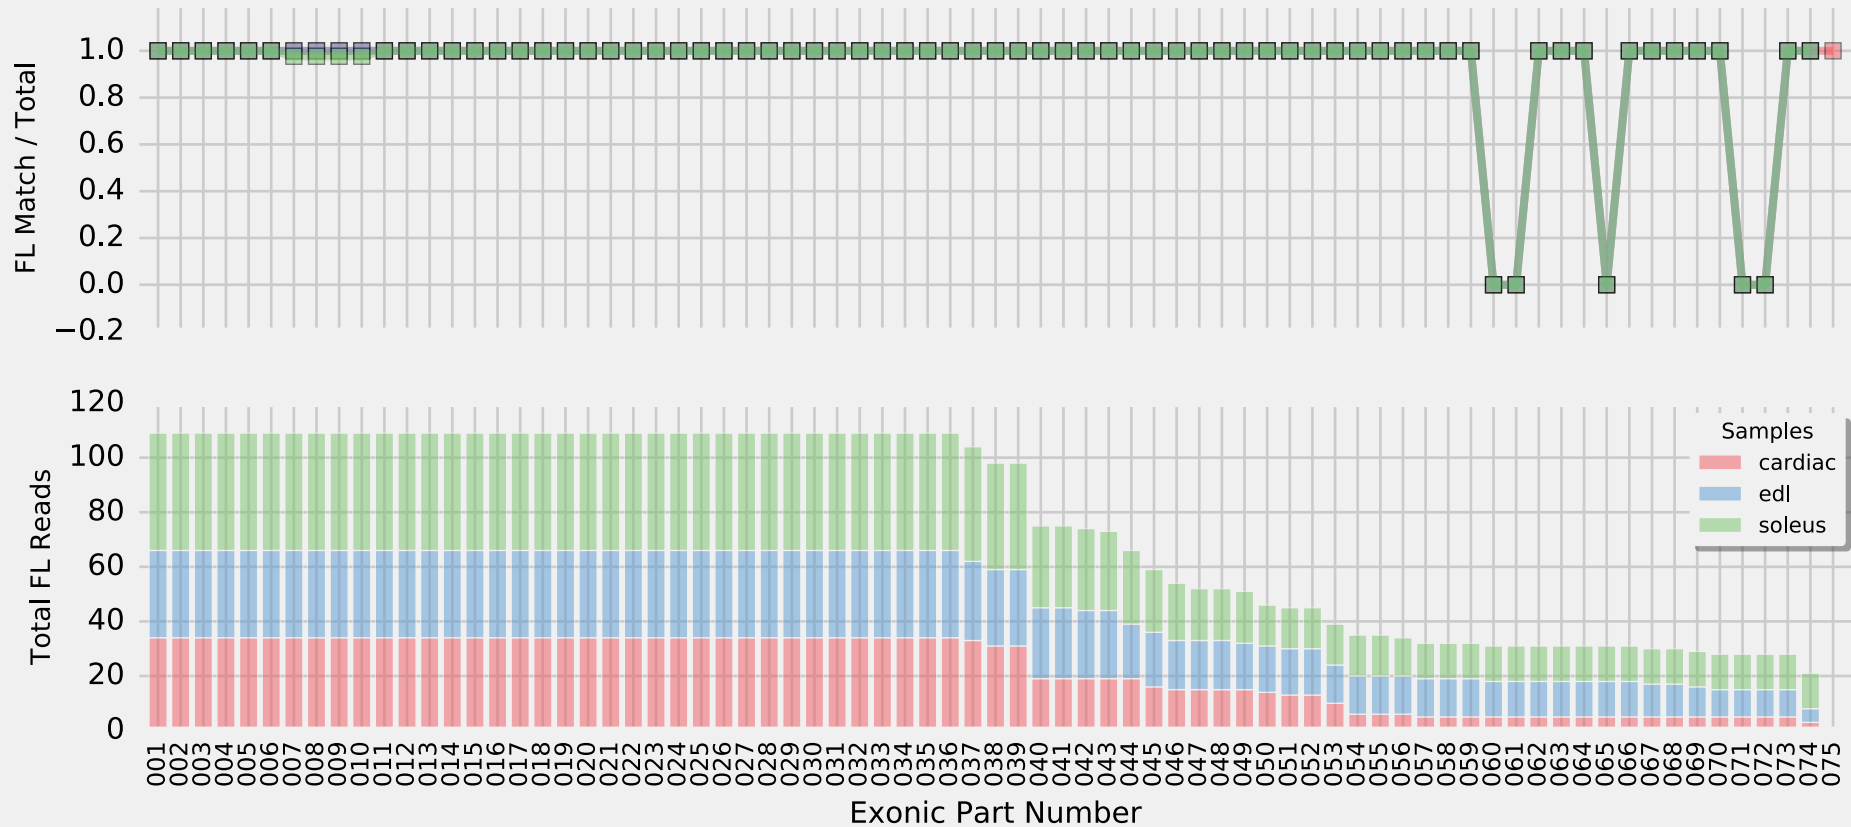

# Tln2

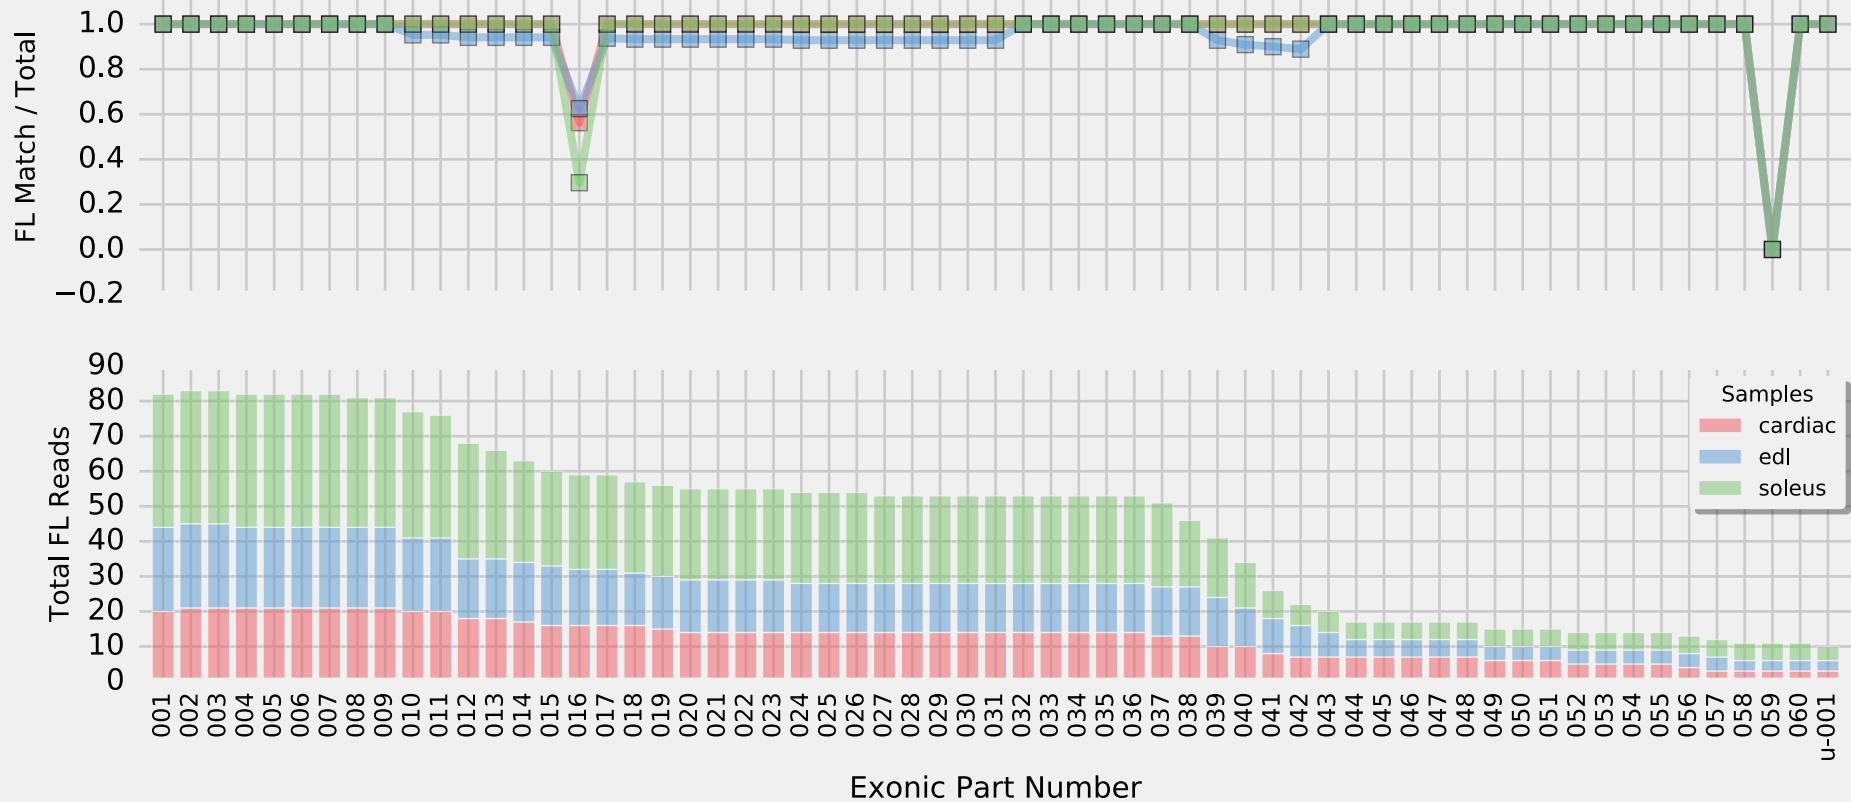

# Tmem106b

FL Match / Total

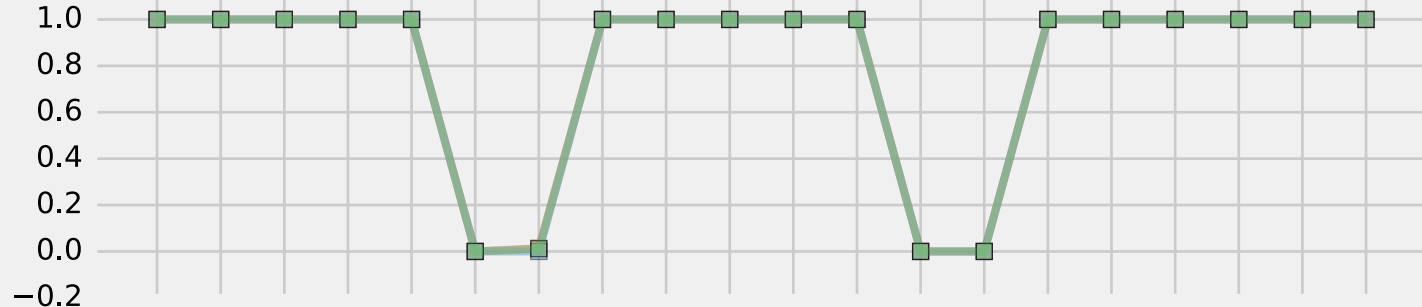

Total FL Reads

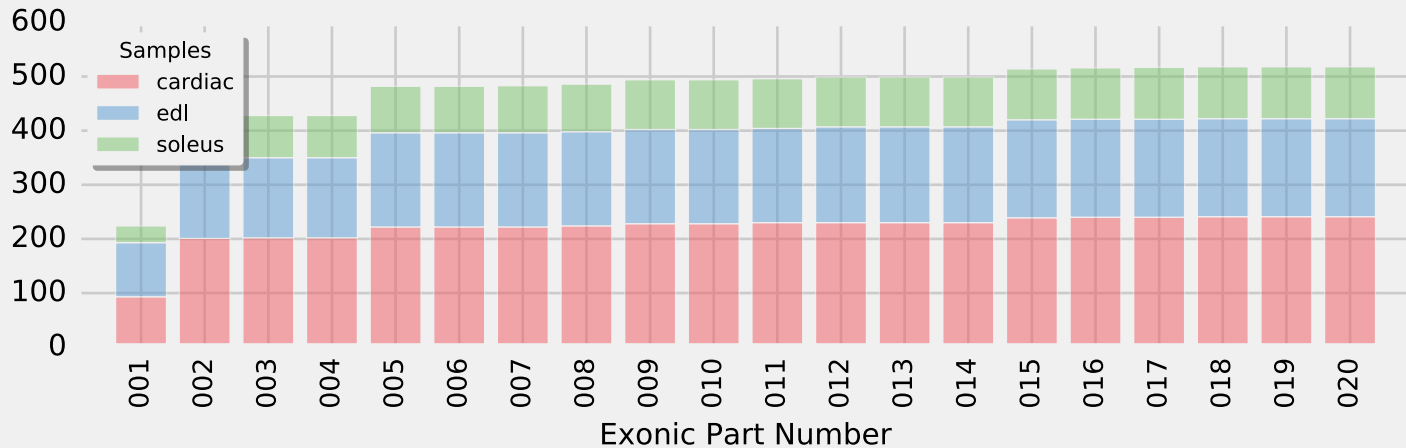



# Tmem2

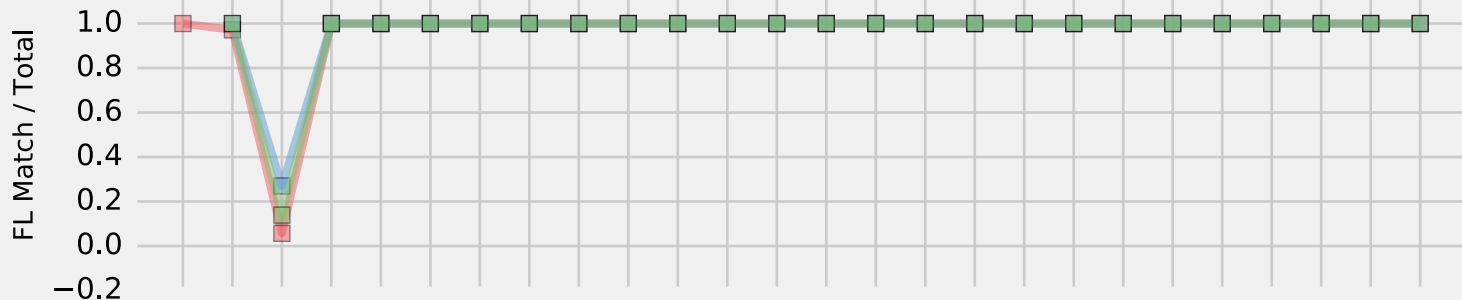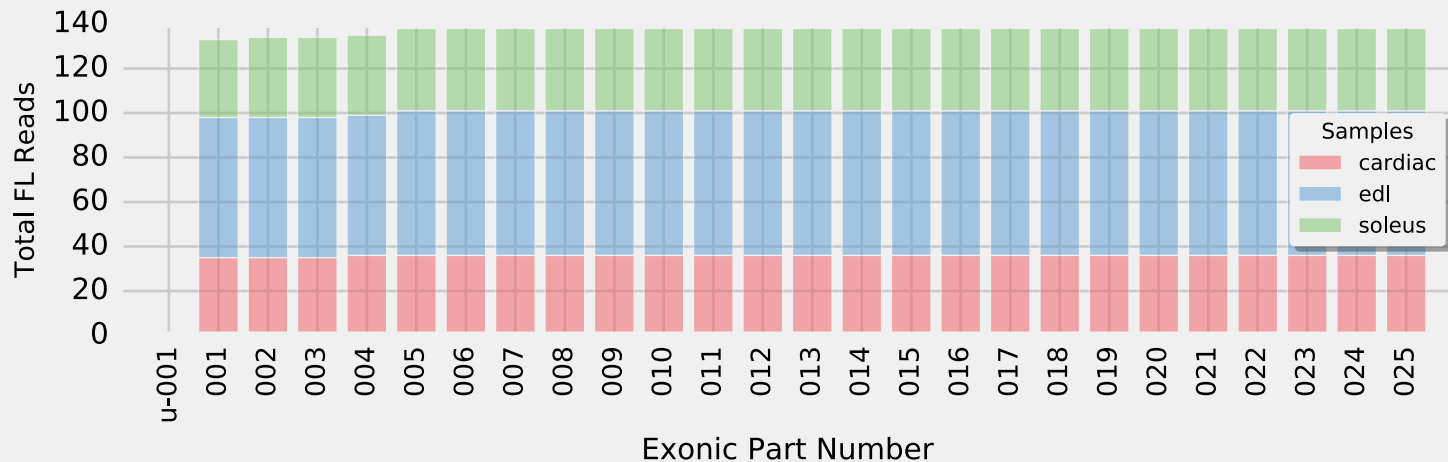

# Tmem245

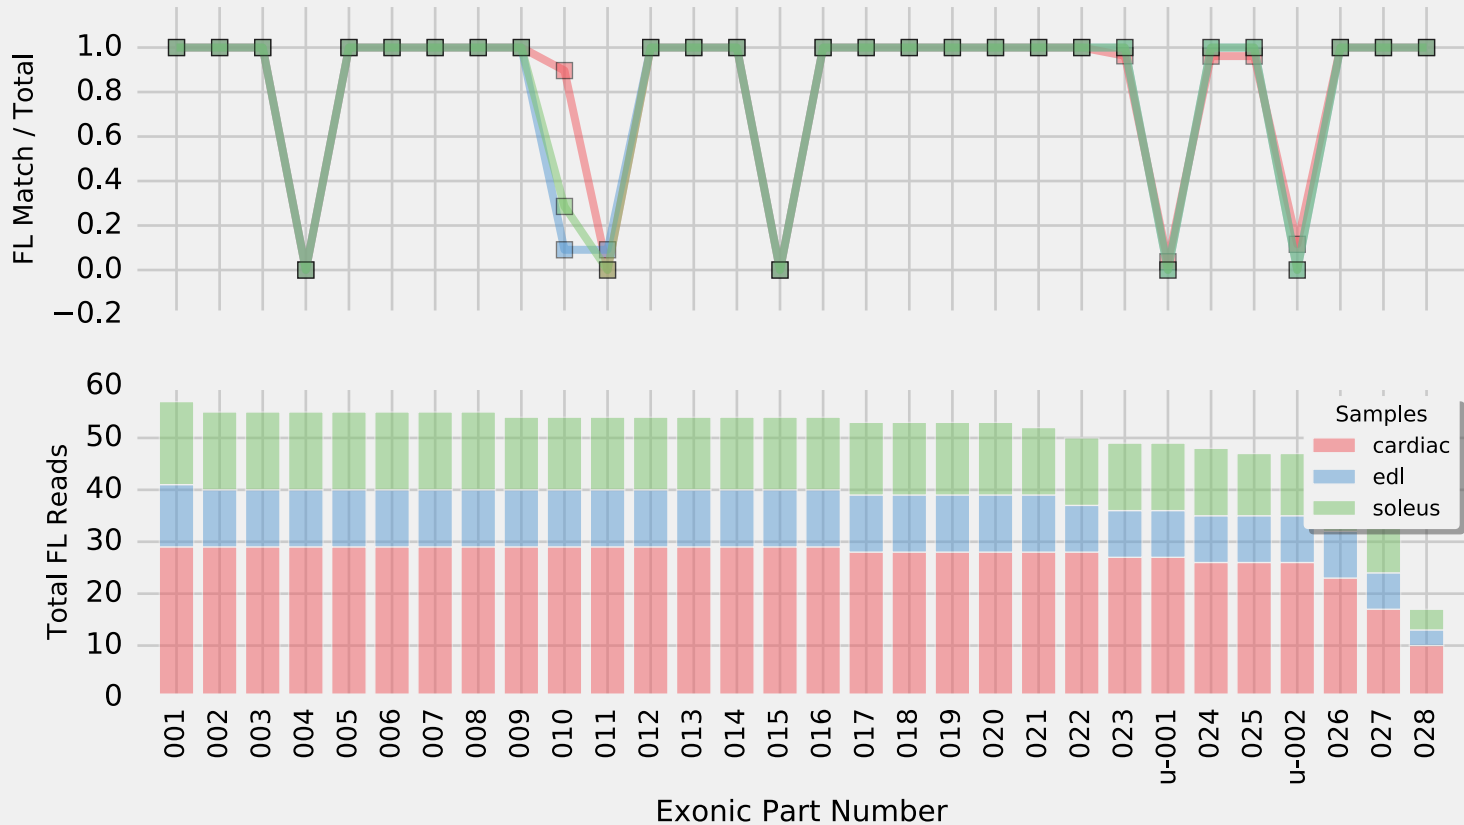

# Tmem56

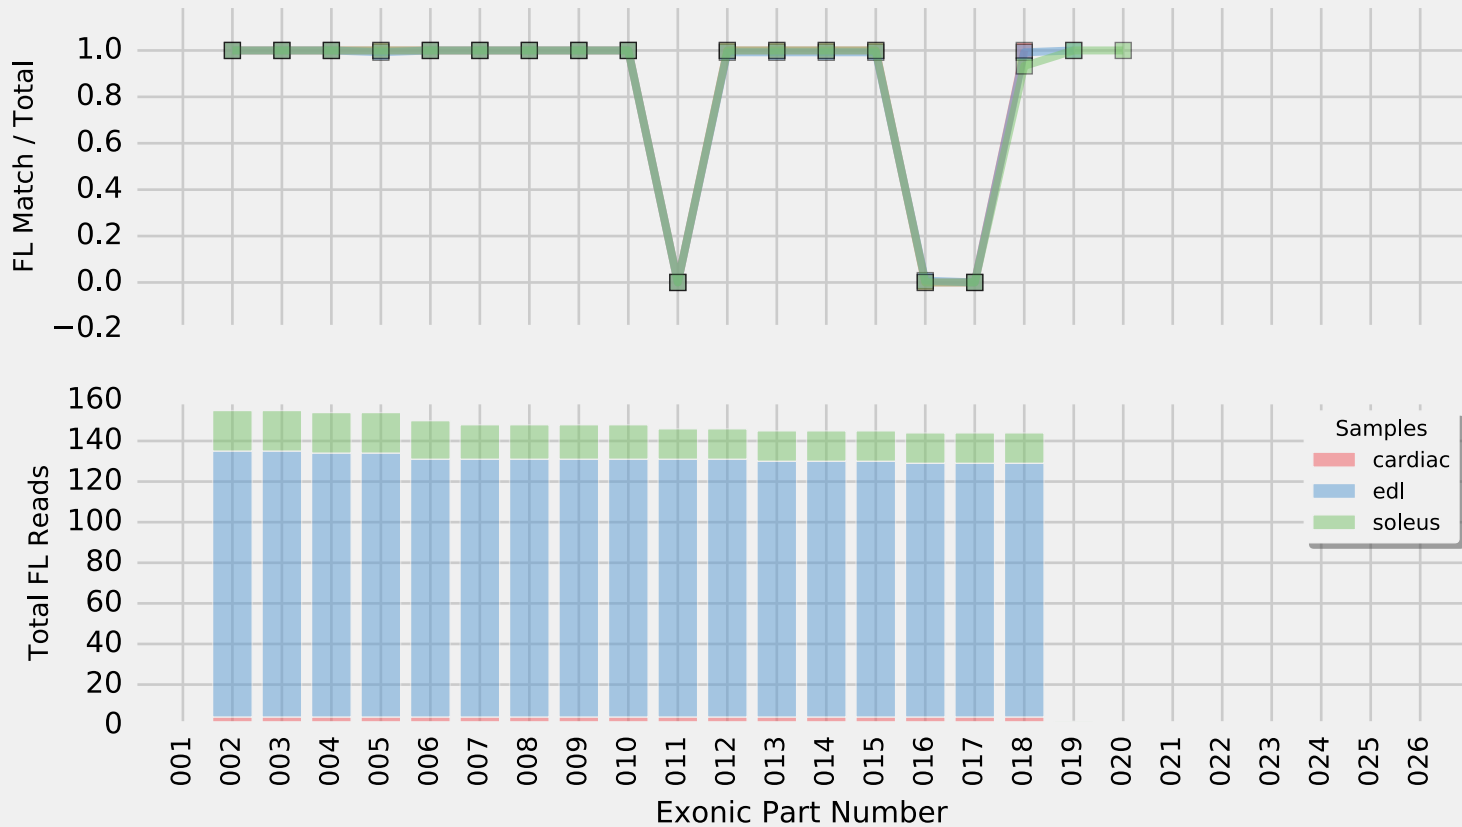

# Tmem94

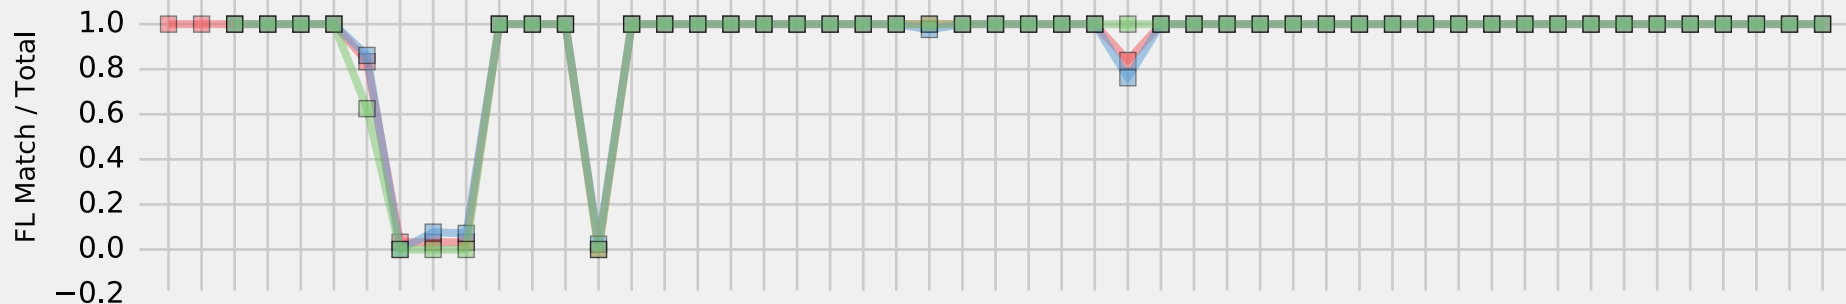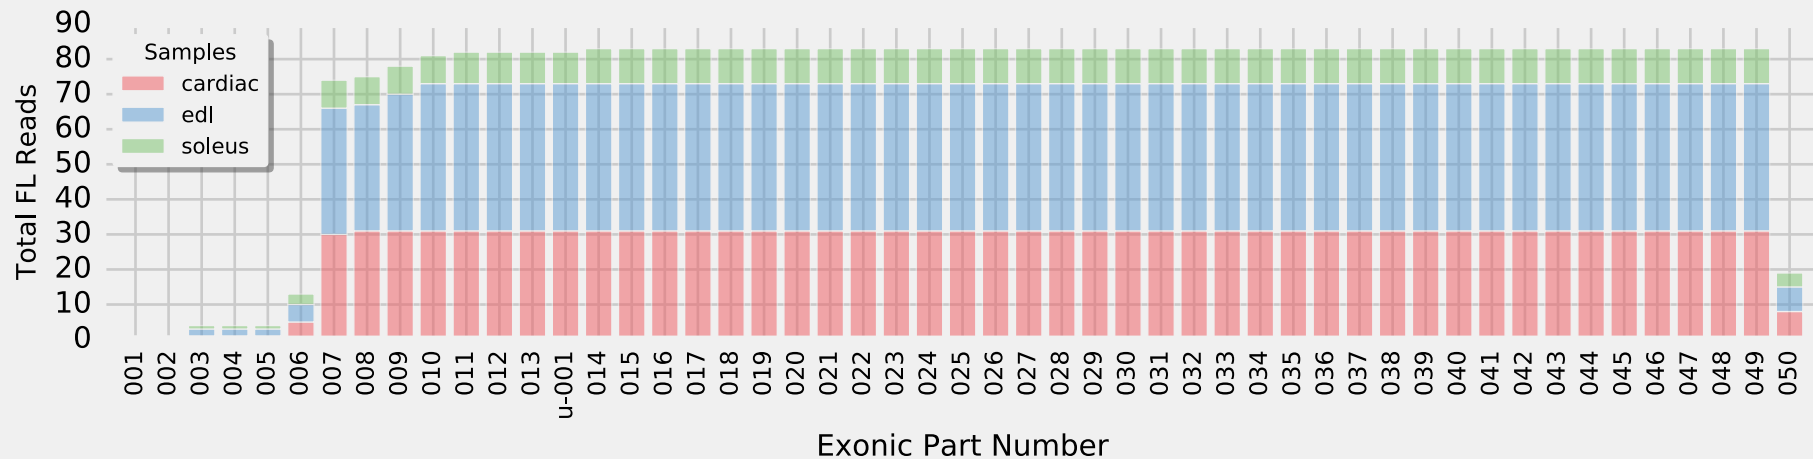

# Tmtc1

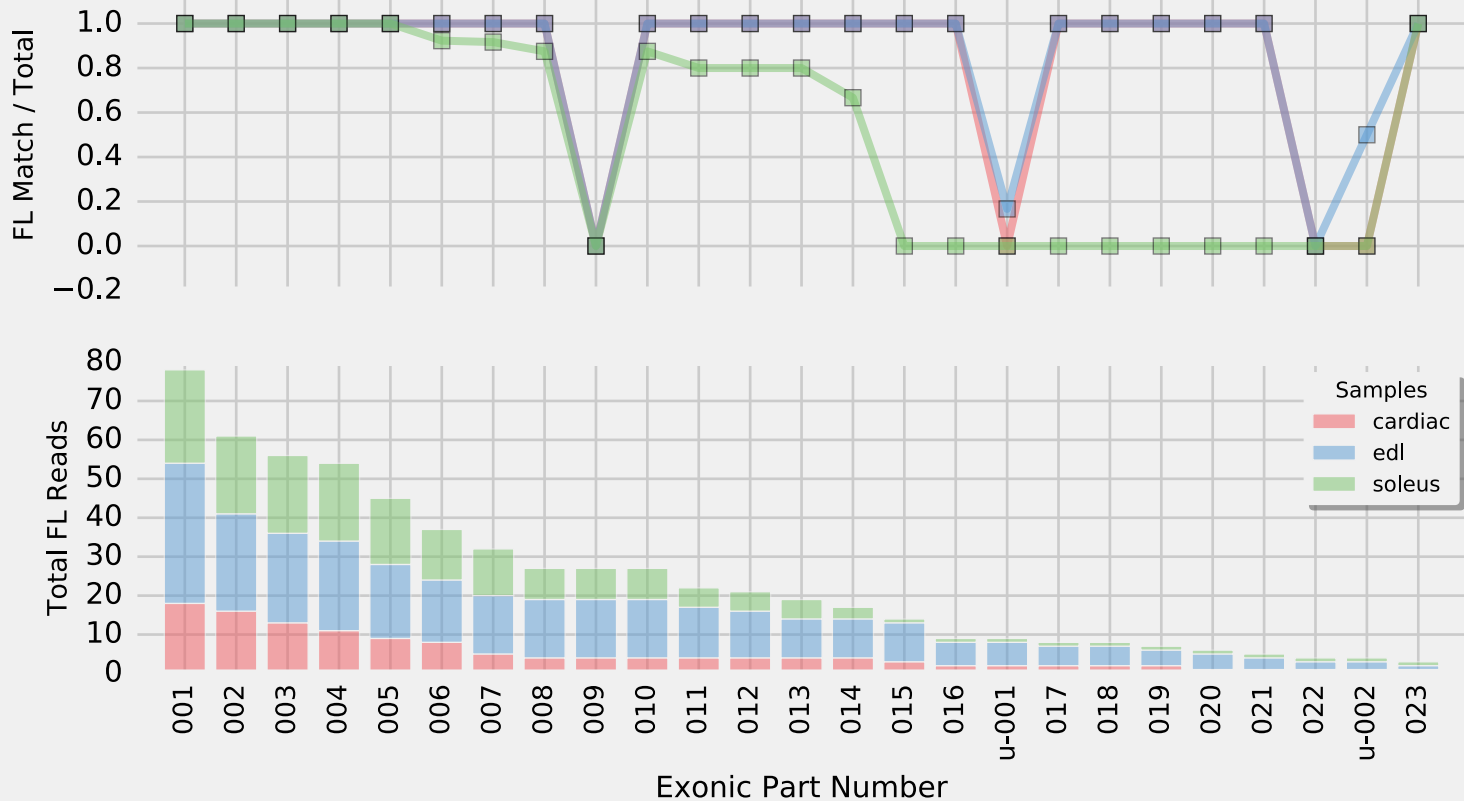

# Tnc

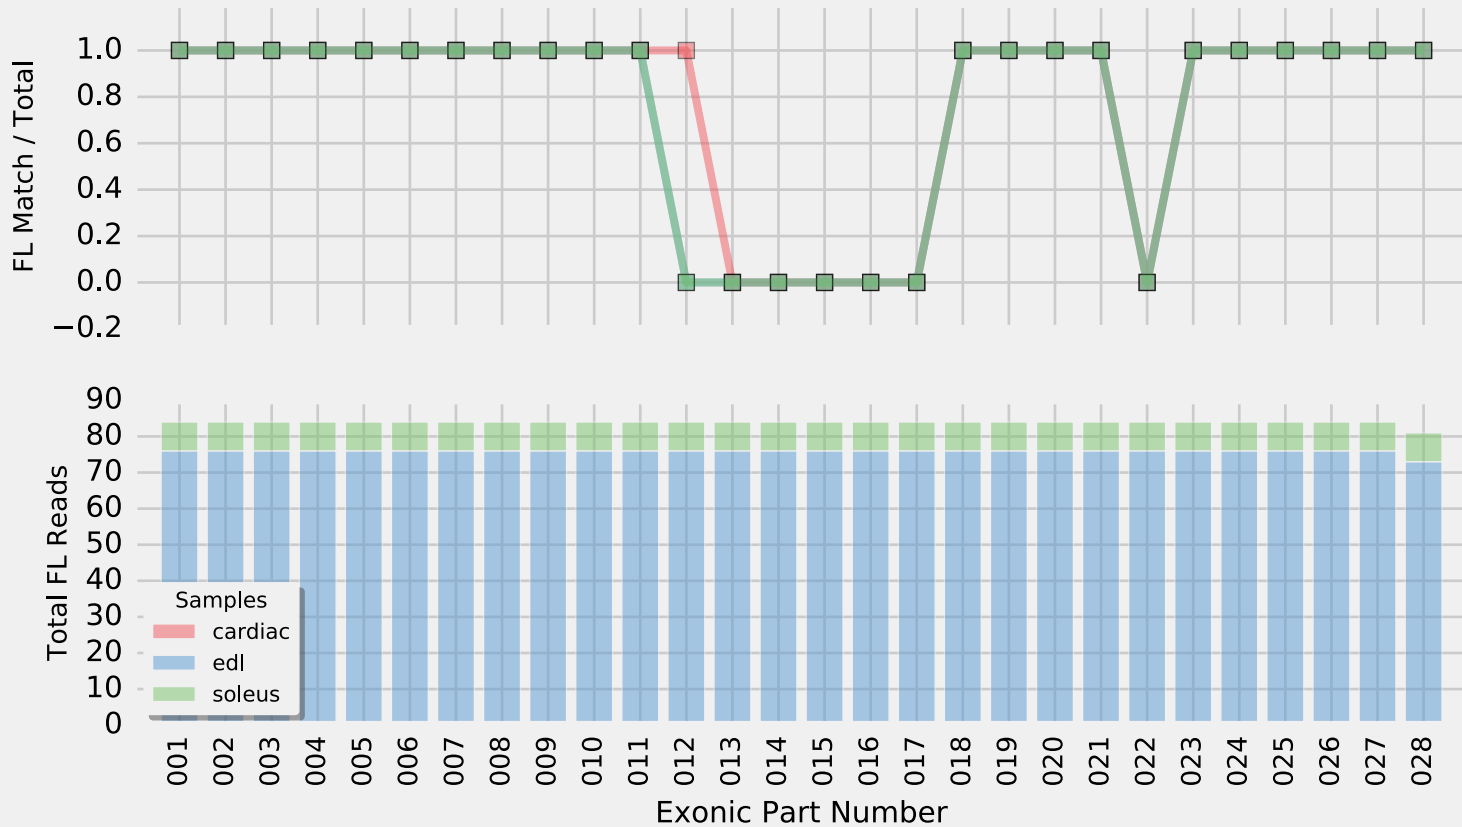

# Tnik

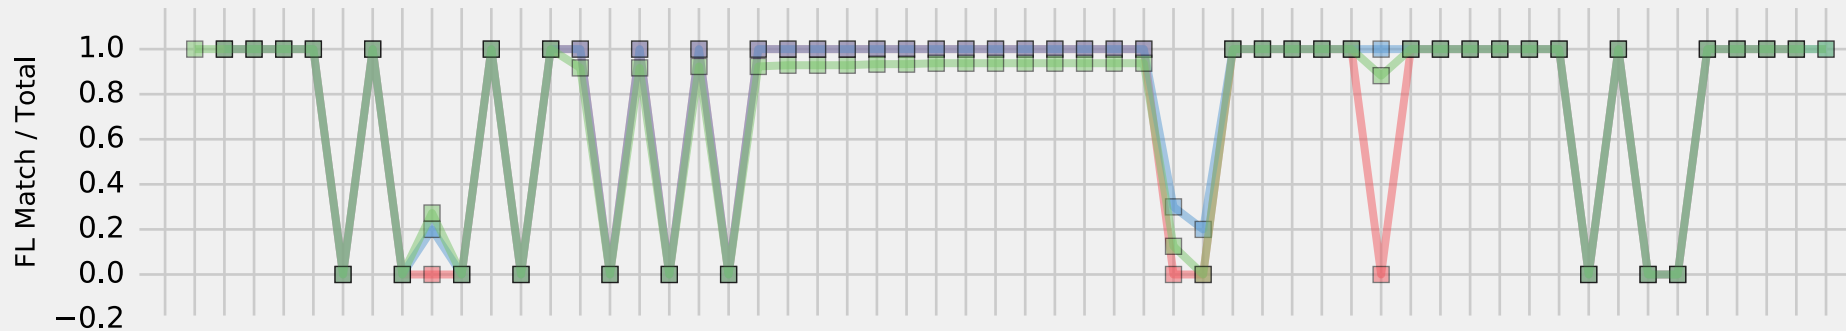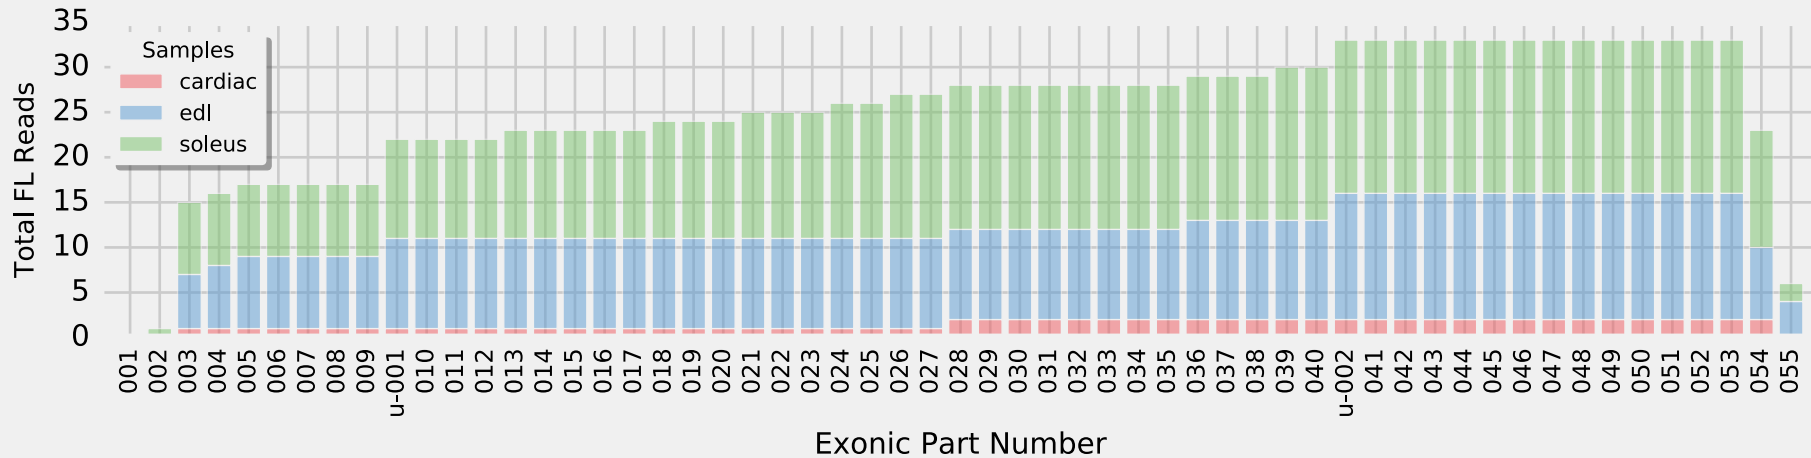

# Tnks1bp1

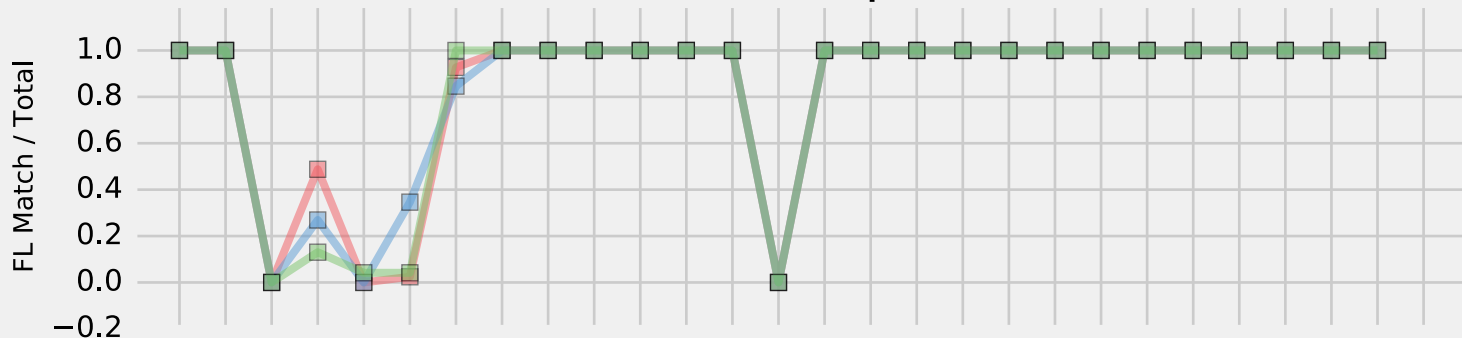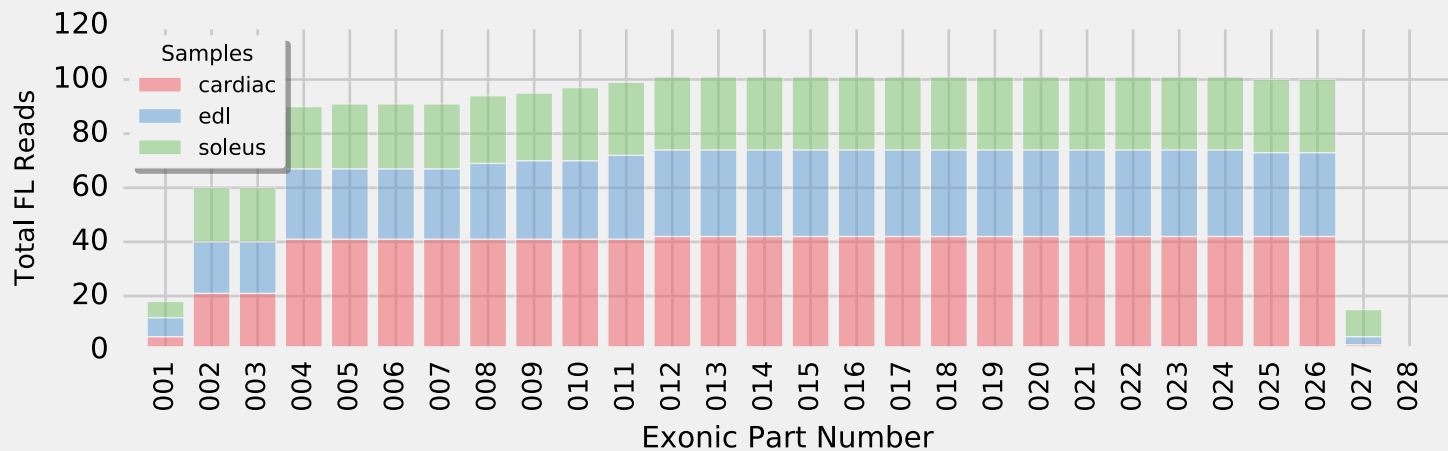



# Tnks2

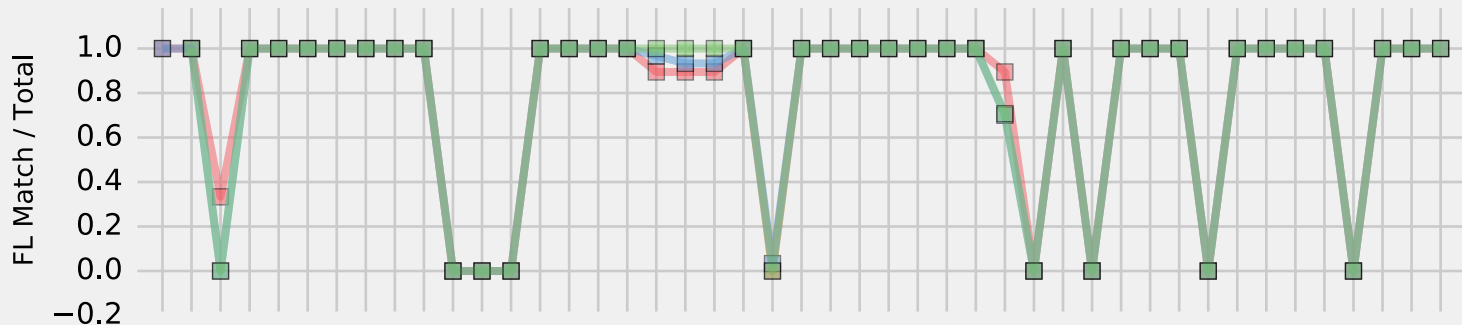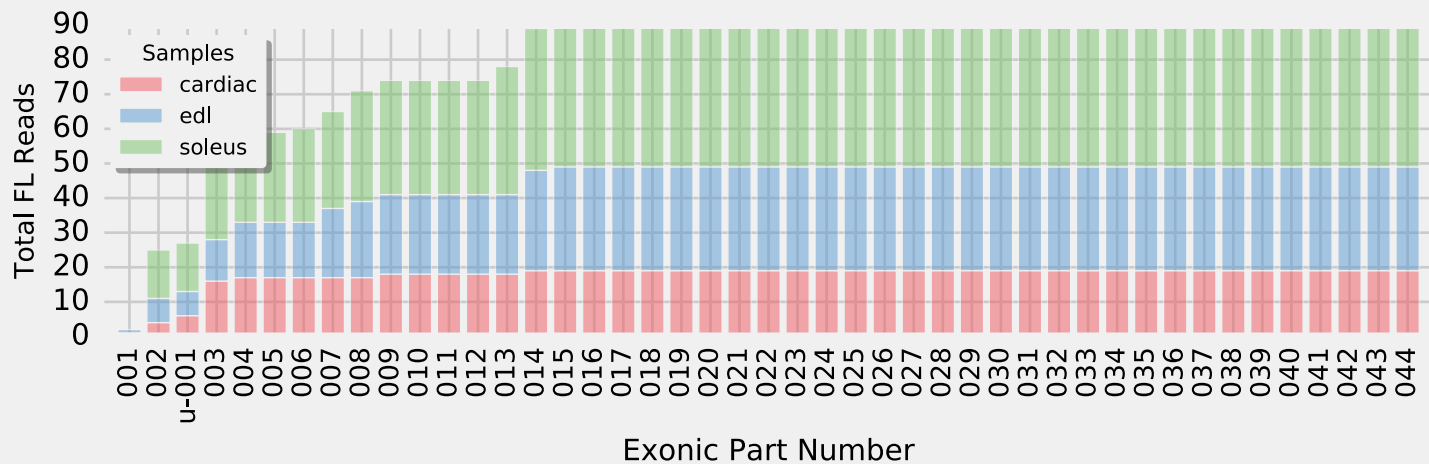

# Tnnt3

FL Match / Total

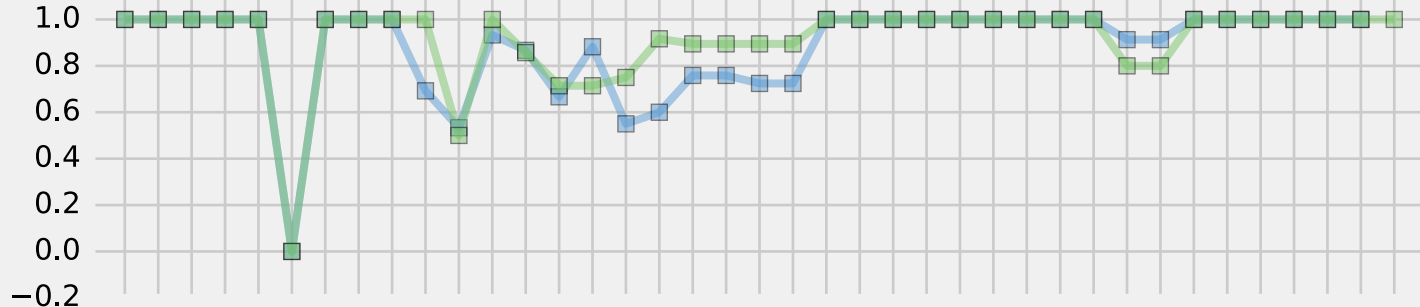

Total FL Reads

Samples

- cardiac
- edl
- soleus

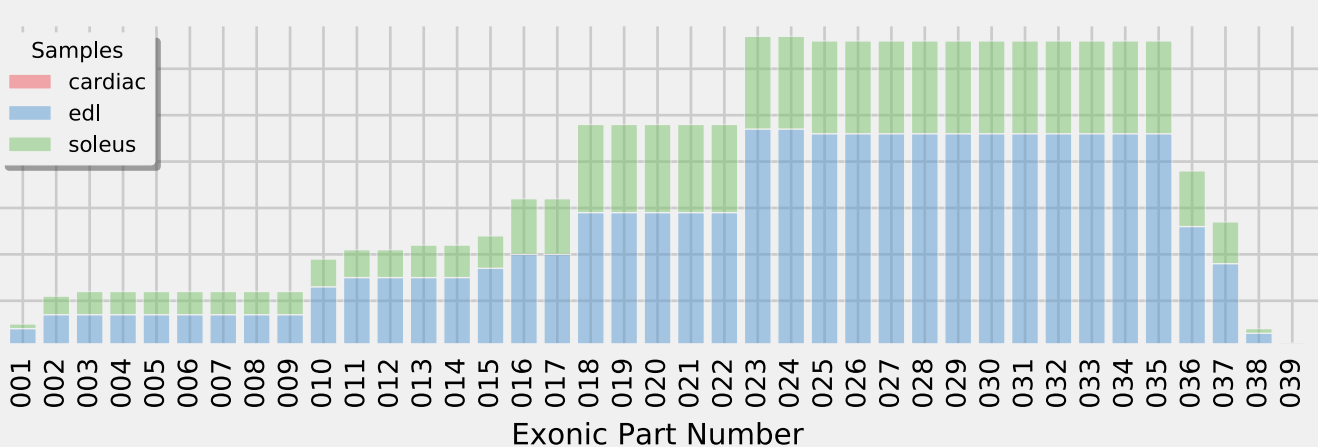

# Tnpo1

FL Match / Total

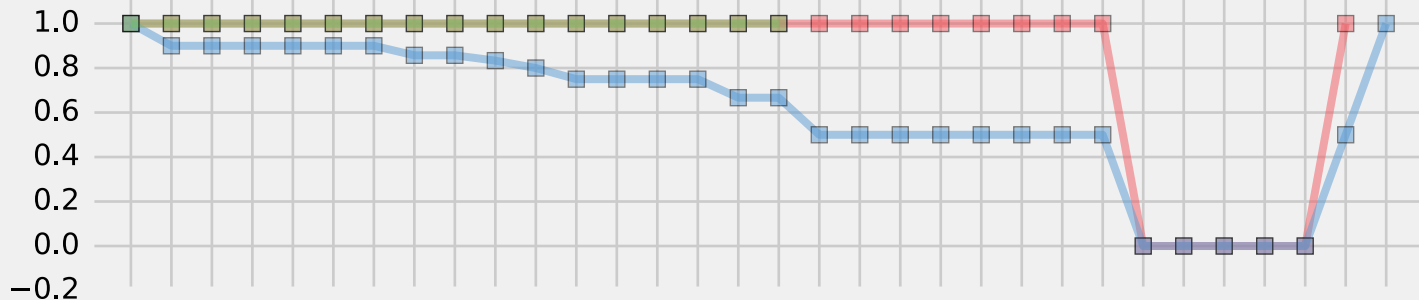

Total FL Reads

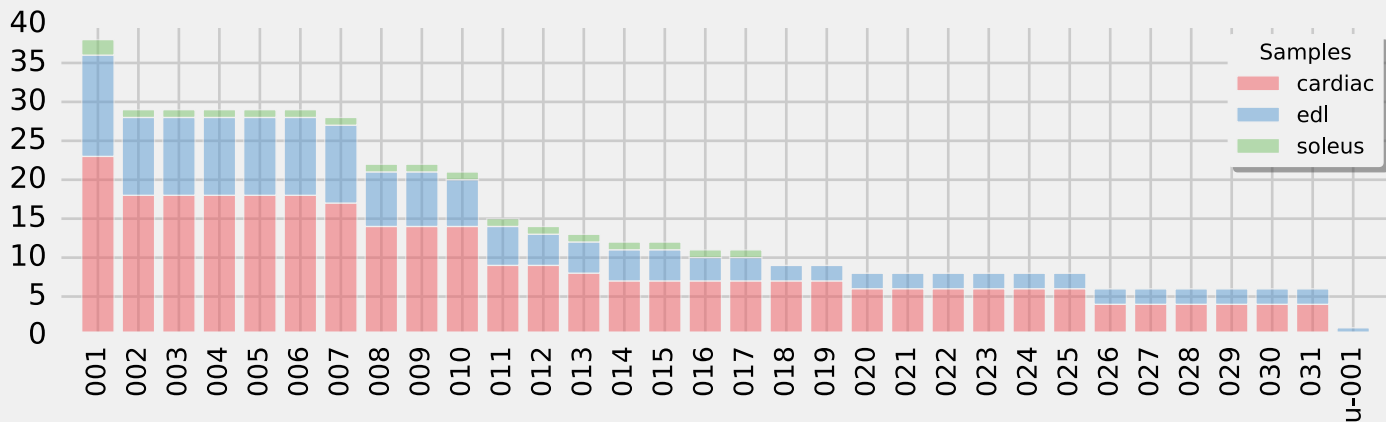

Exonic Part Number

# Tnrc6b

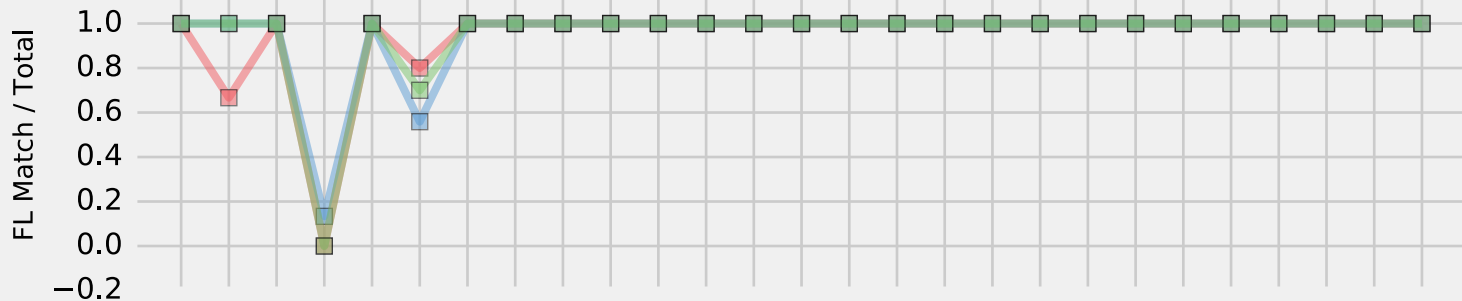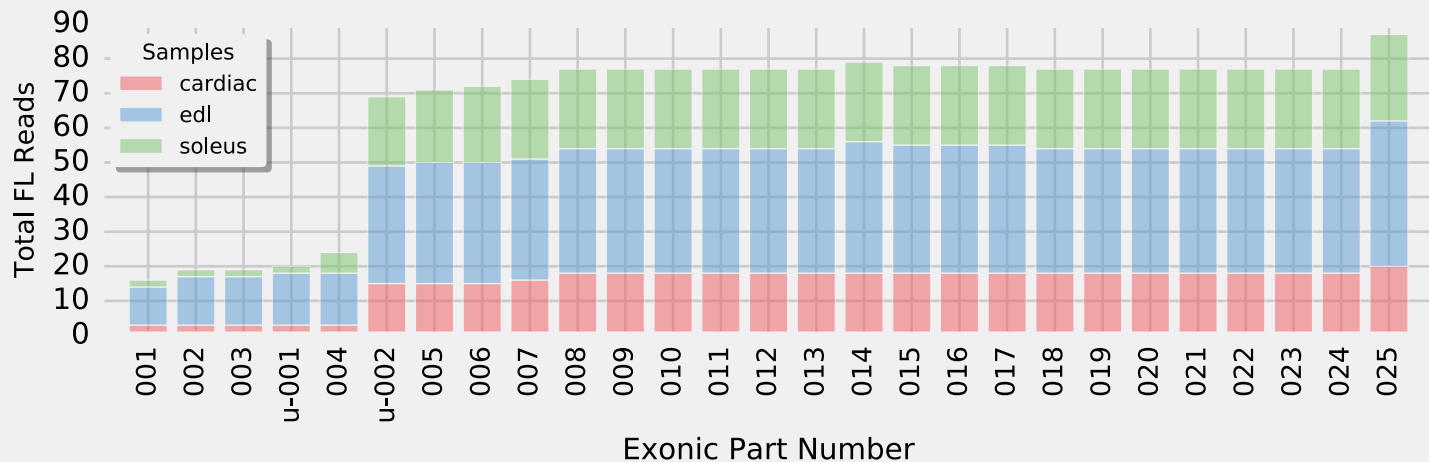

# Tns1

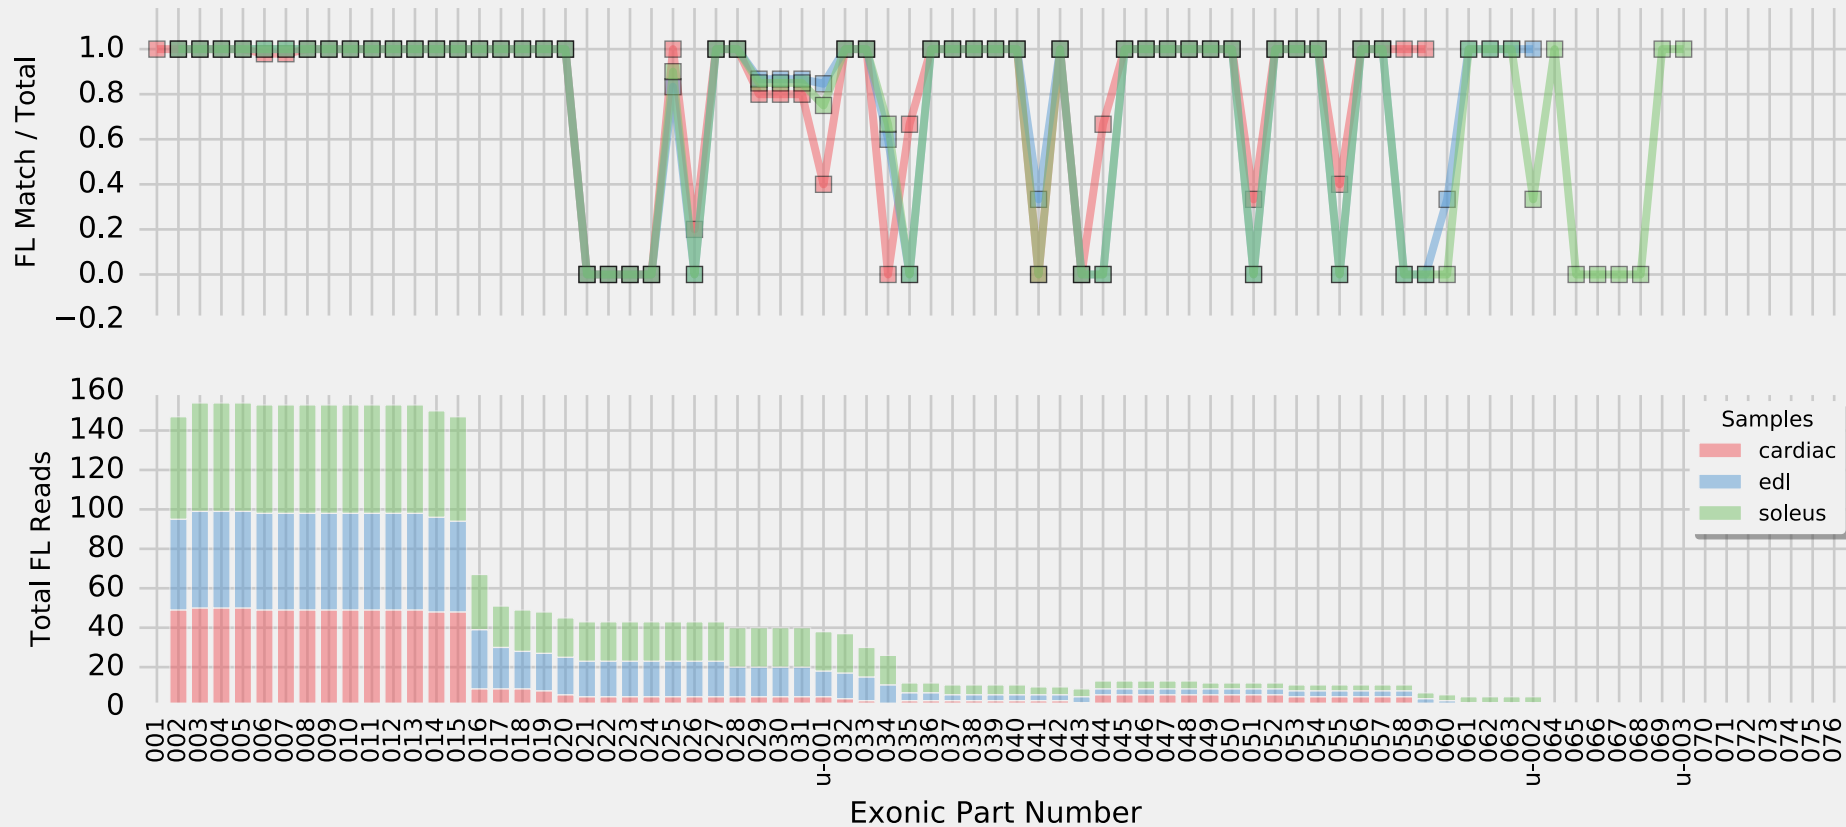

# Tor1aip2

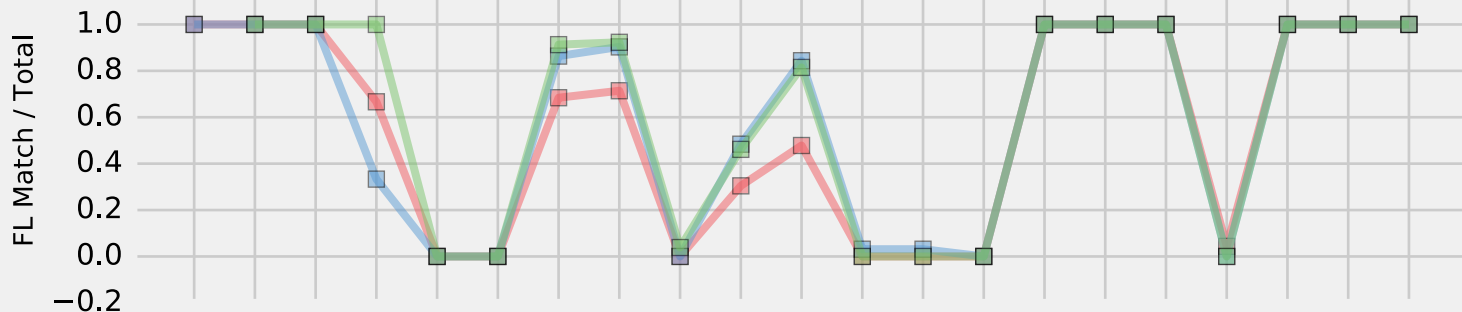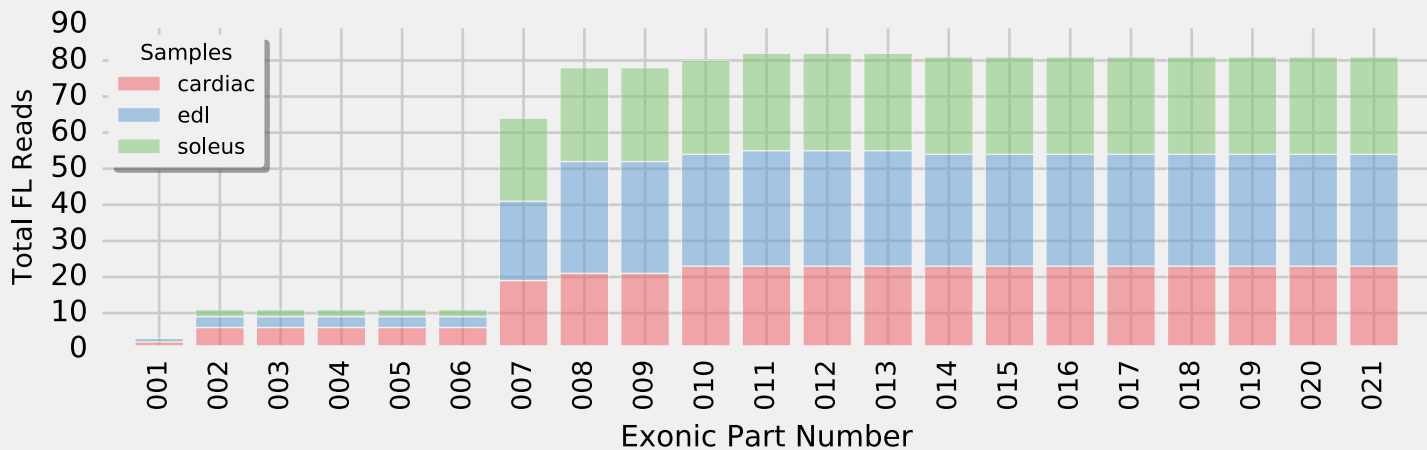

# Tpm1

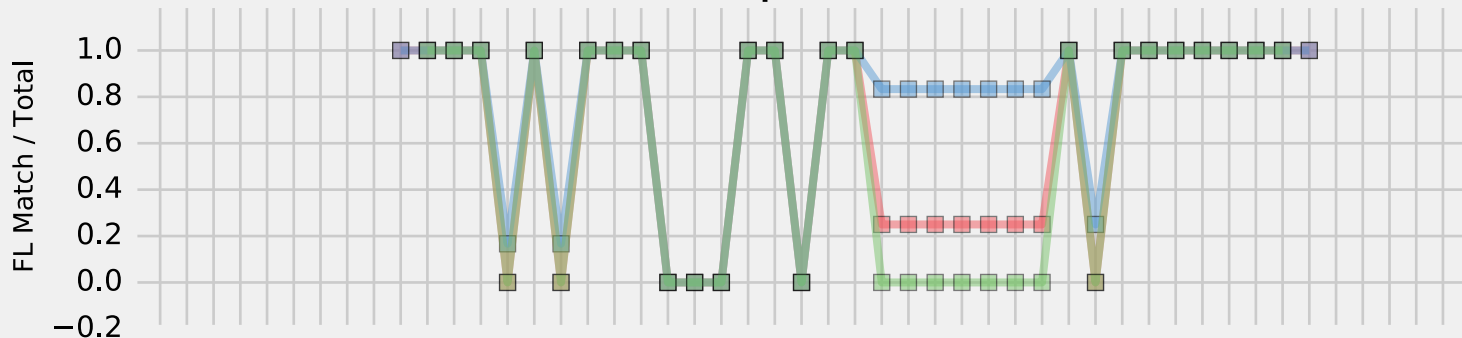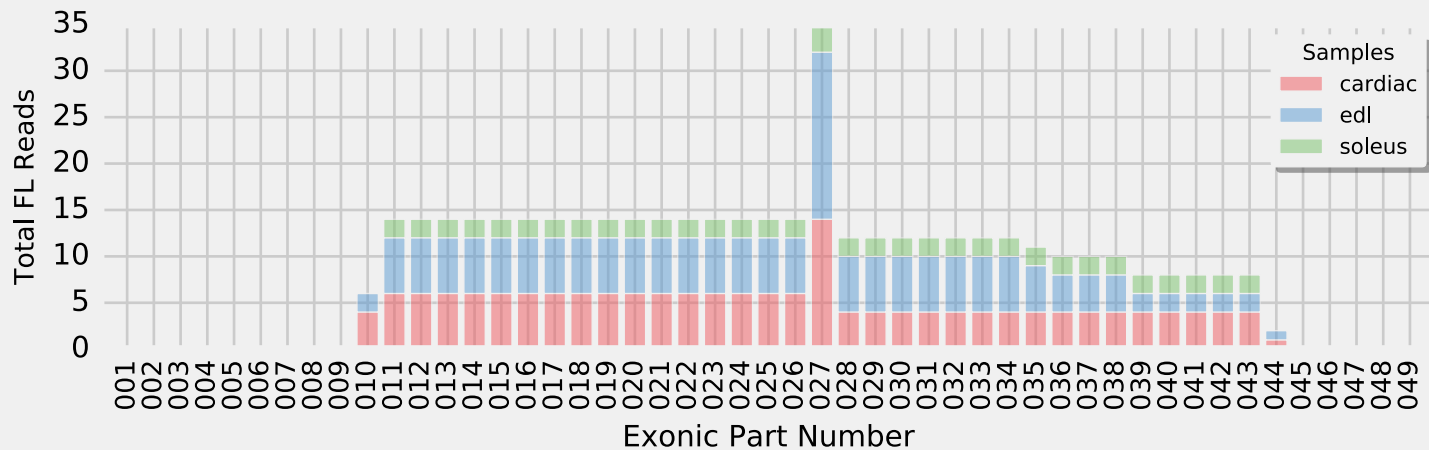

# Tpr

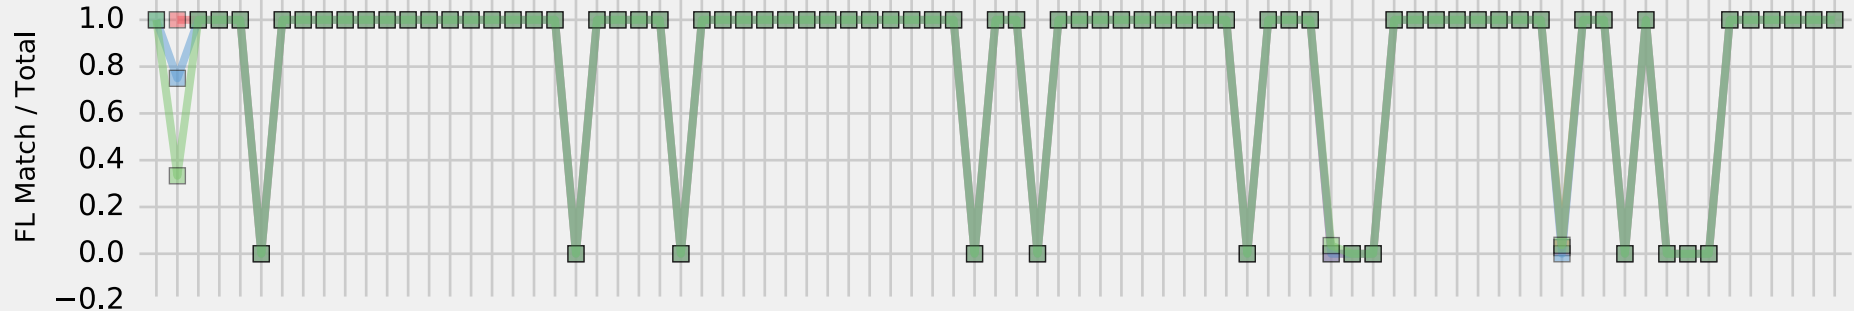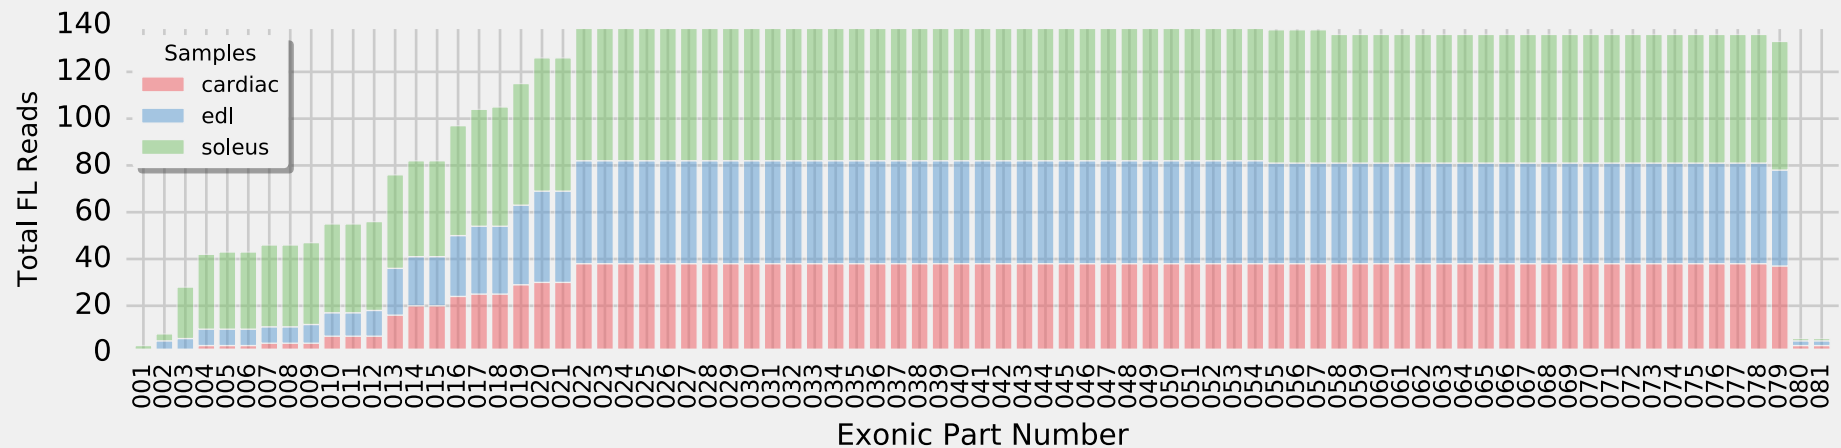



# Traf6

FL Match / Total

1.0  
0.8  
0.6  
0.4  
0.2  
0.0  
-0.2

Total FL Reads

160  
140  
120  
100  
80  
60  
40  
20  
0

Samples

cardiac  
edl  
soleus

001

002

003

004

005

006

007

008

009

010

011

012

Exonic Part Number

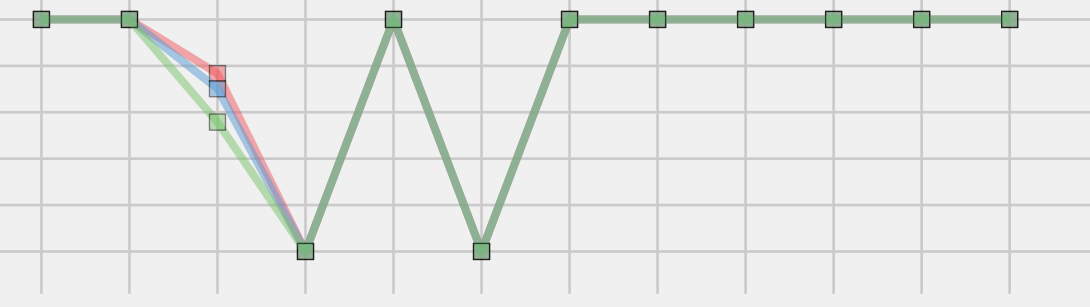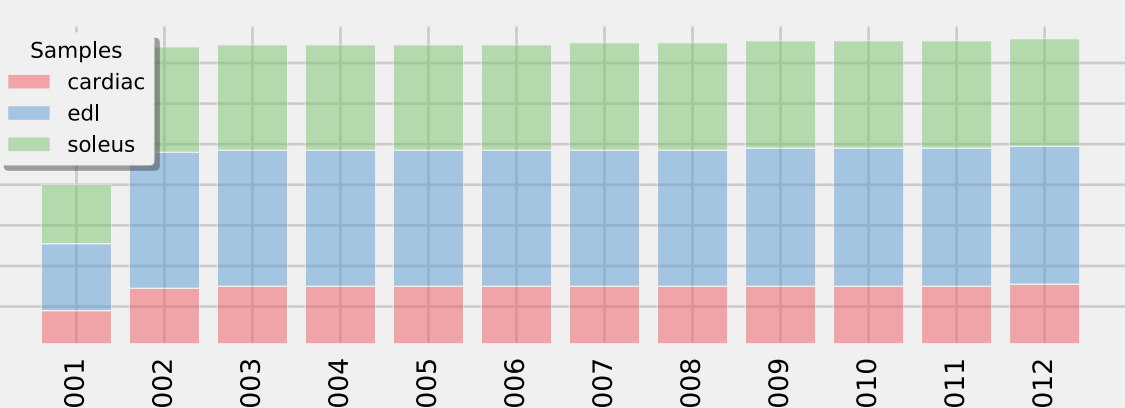

# Trak1

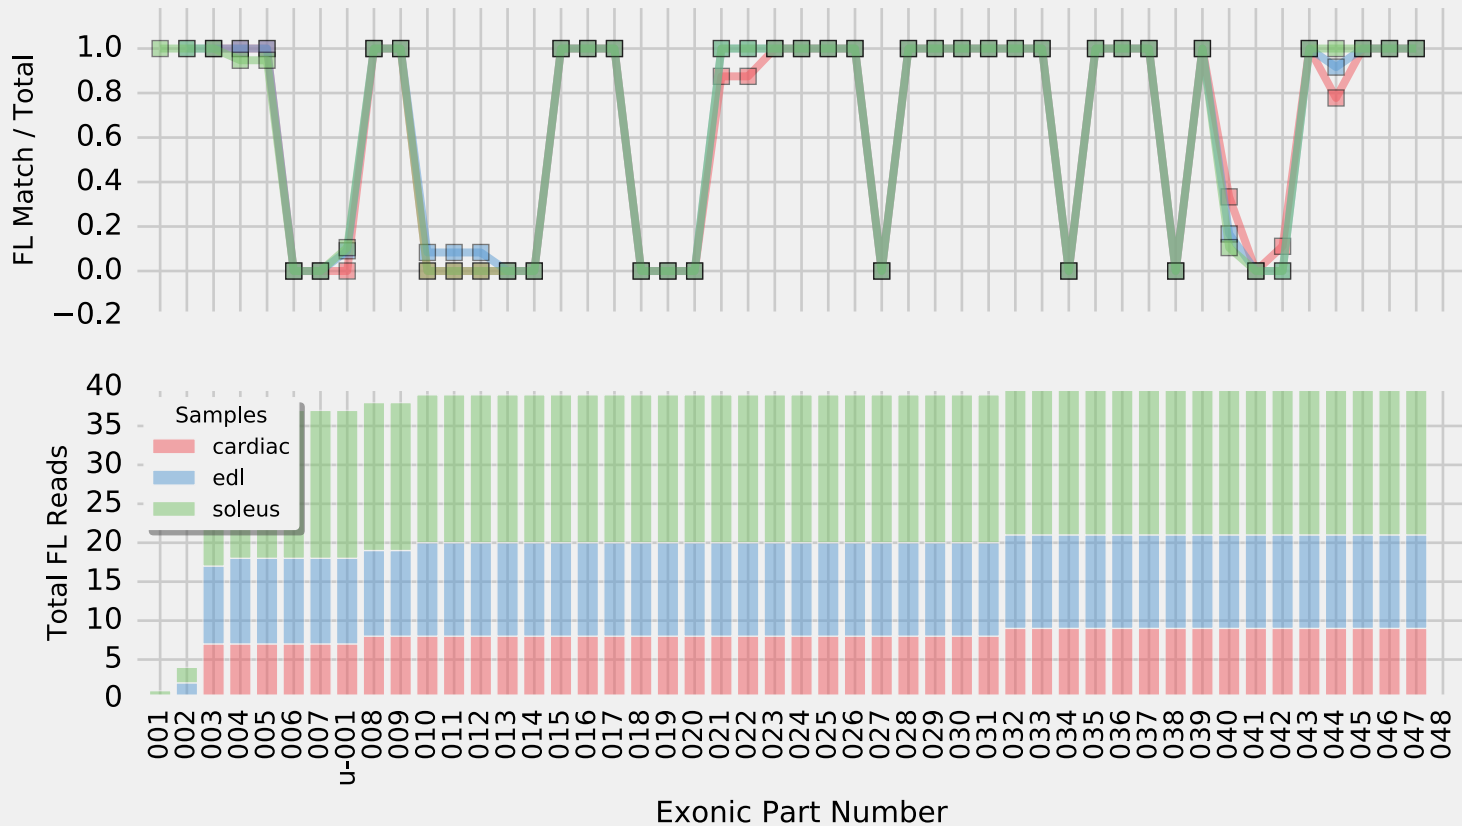

# Trak2

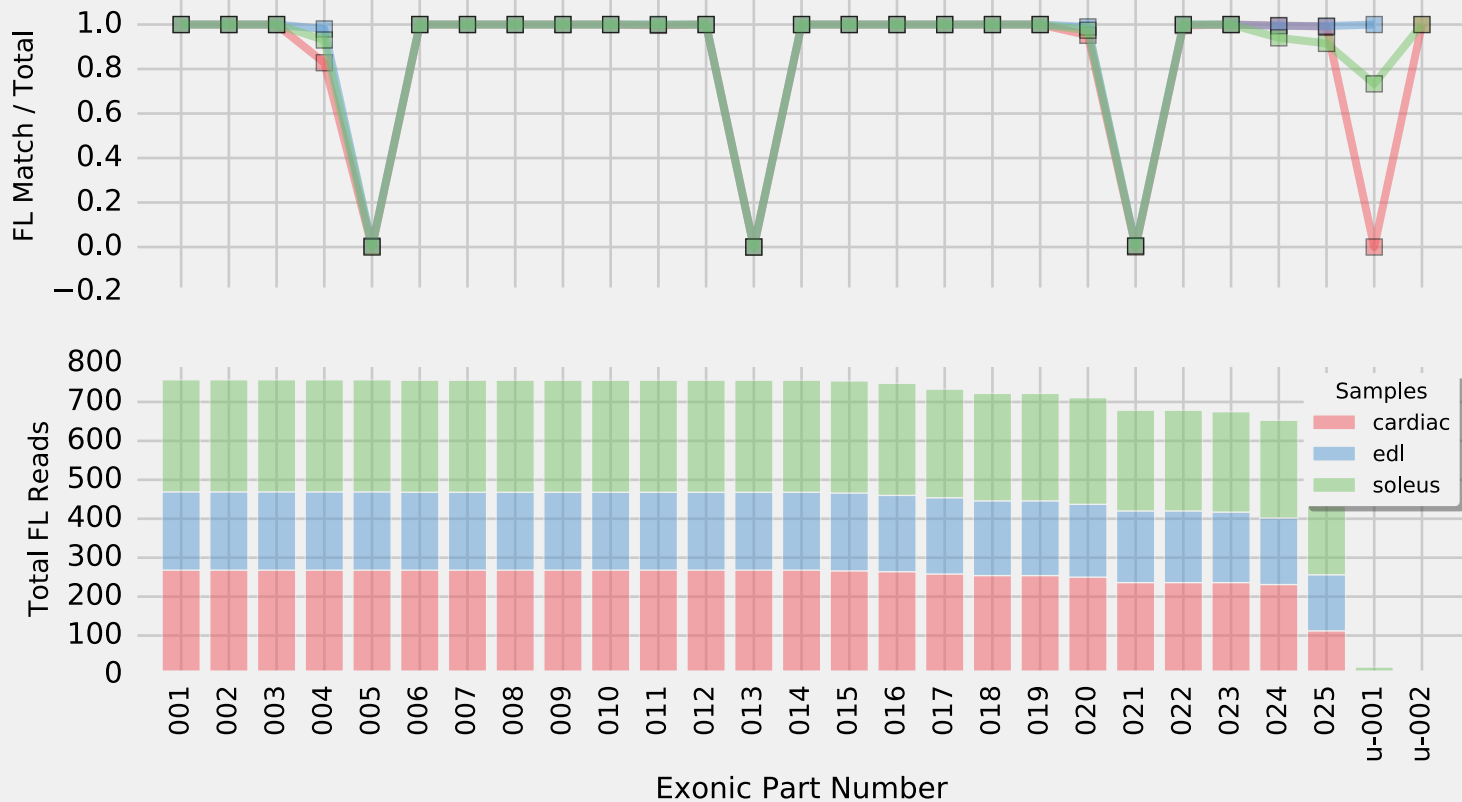

# Trim25

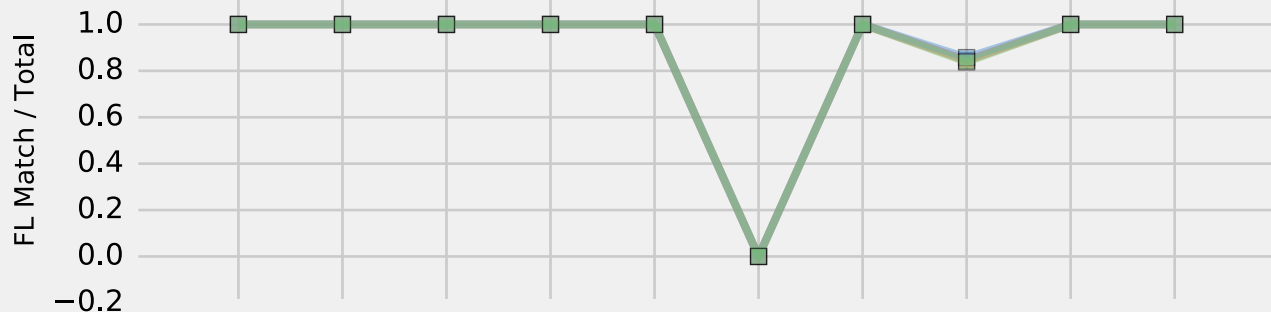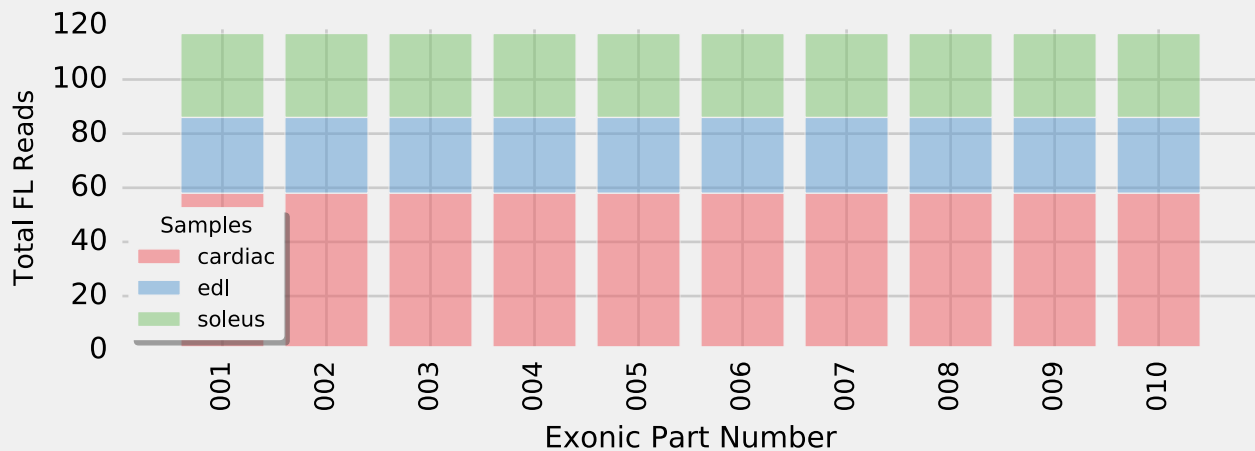

# Trim37

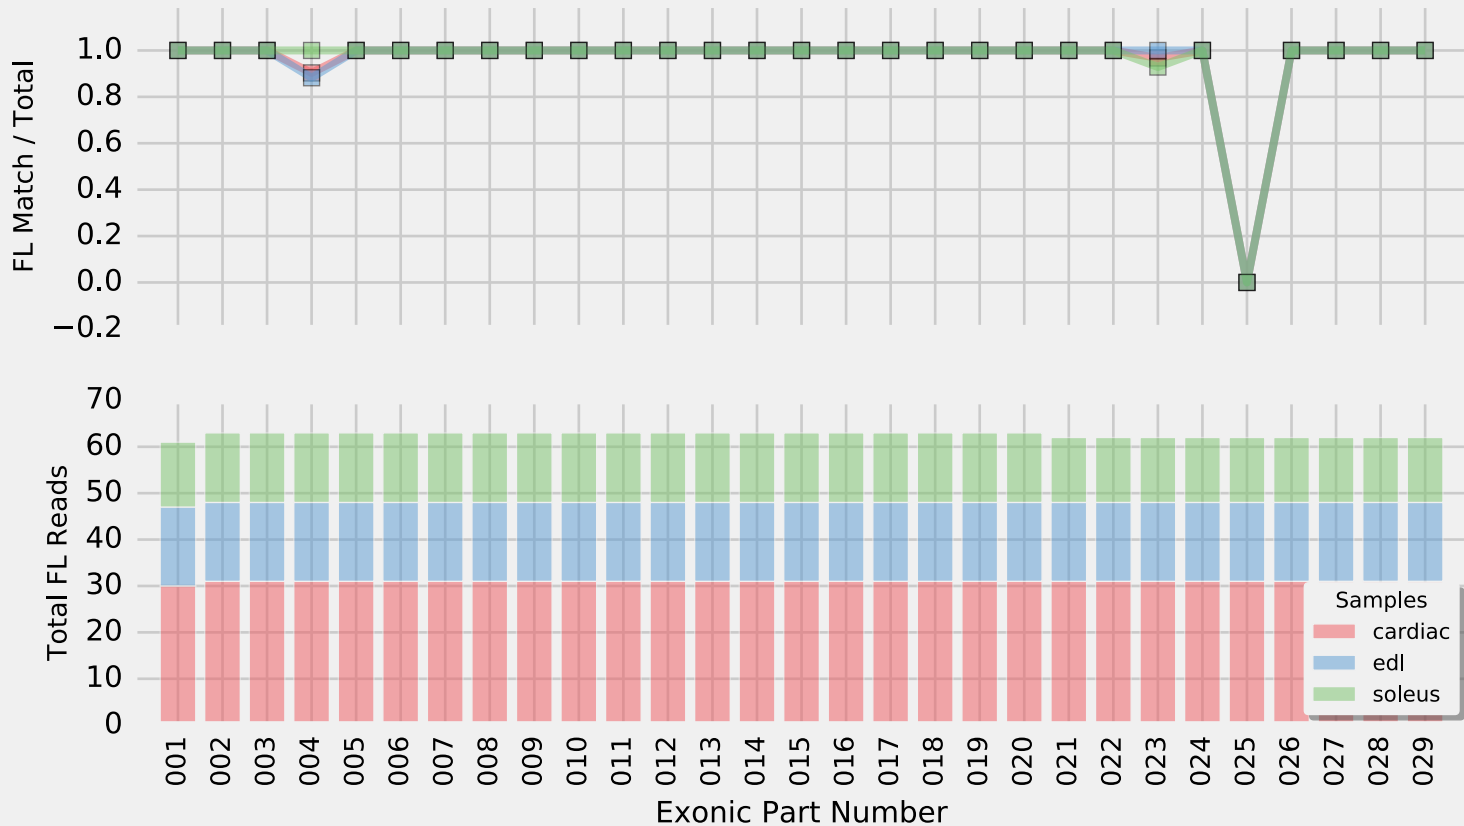

# Trip12

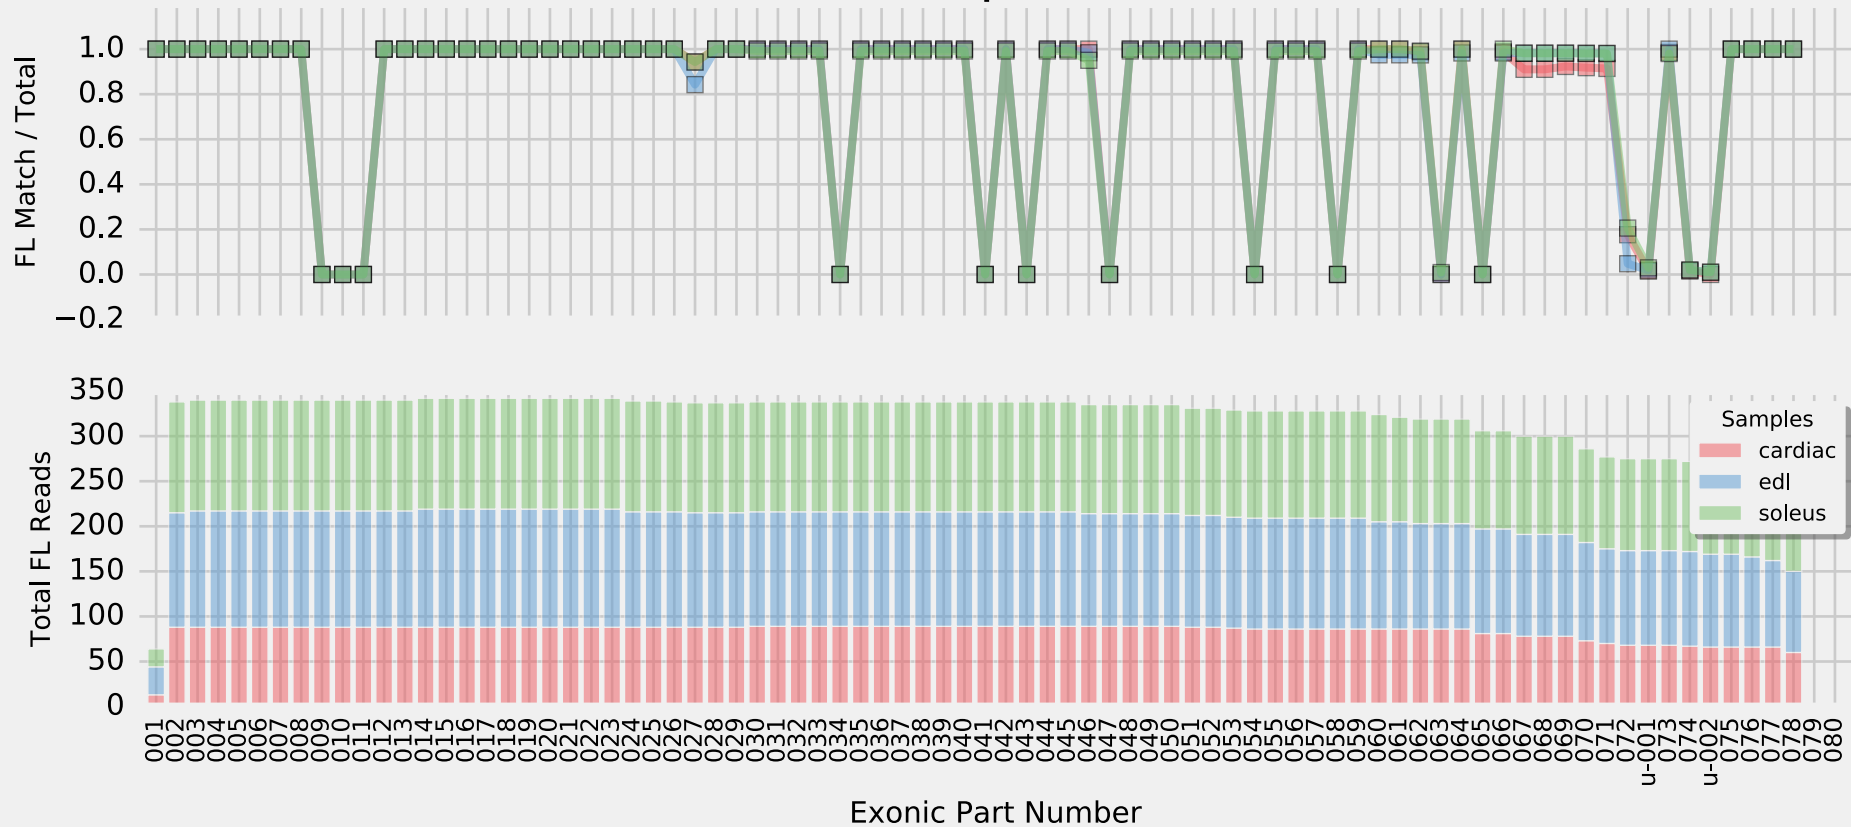

# Trp53bp1

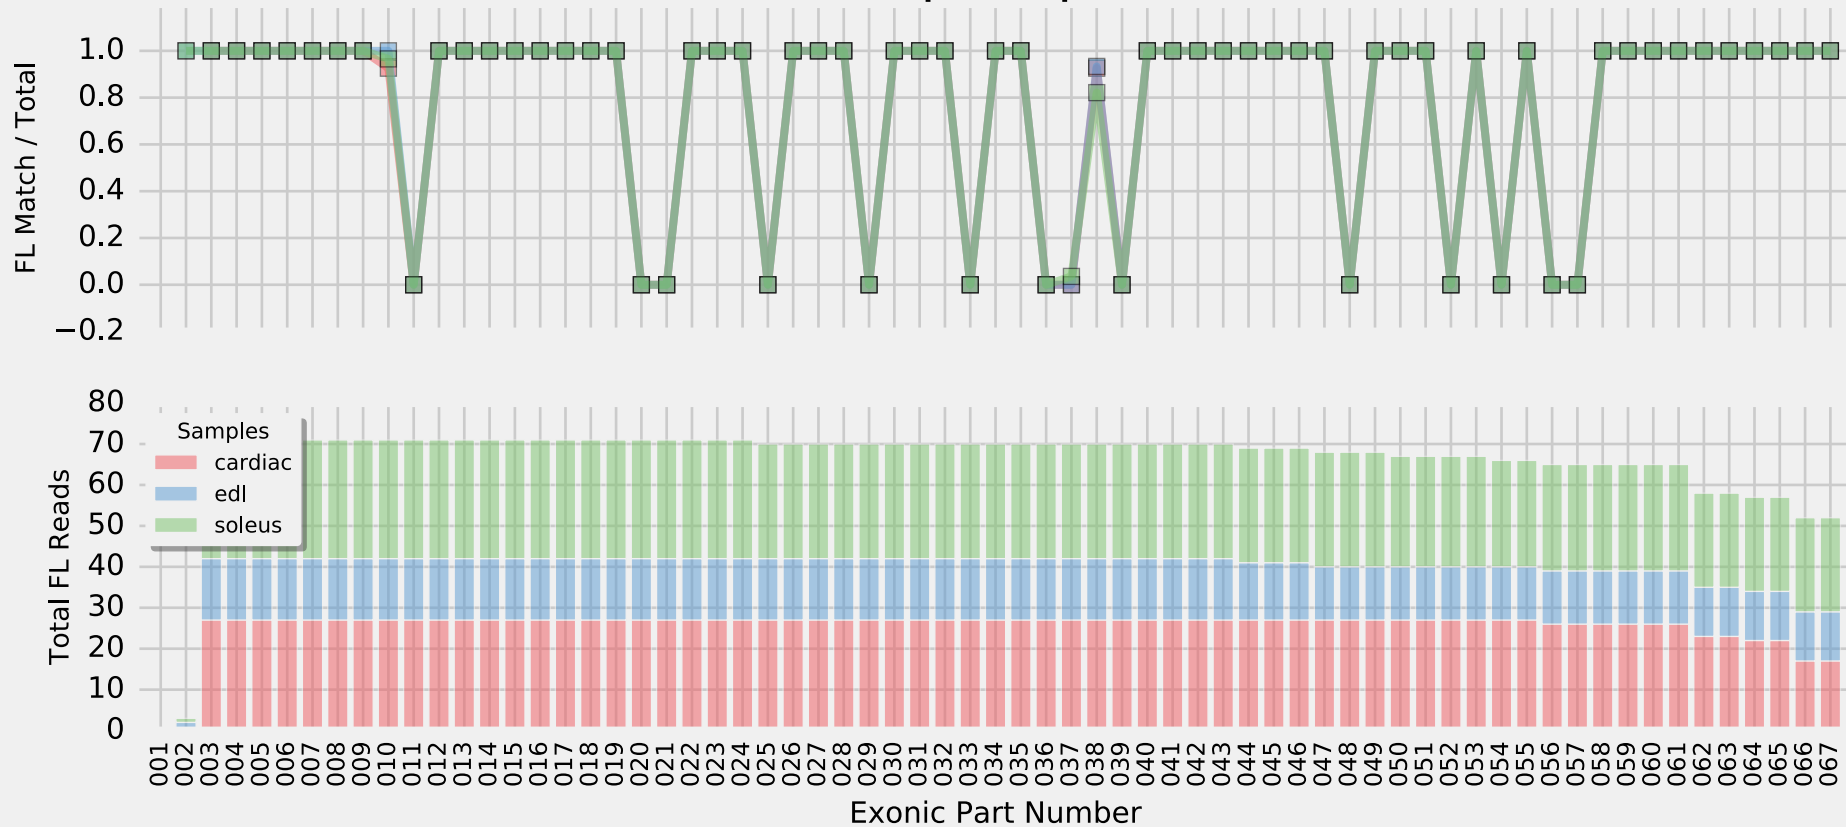

# Trp53inp1

FL Match / Total

1.0  
0.8  
0.6  
0.4  
0.2  
0.0  
-0.2

Total FL Reads

Samples

cardiac  
edl  
soleus

001

002

003

004

005

006

007

008

009

010

Exonic Part Number

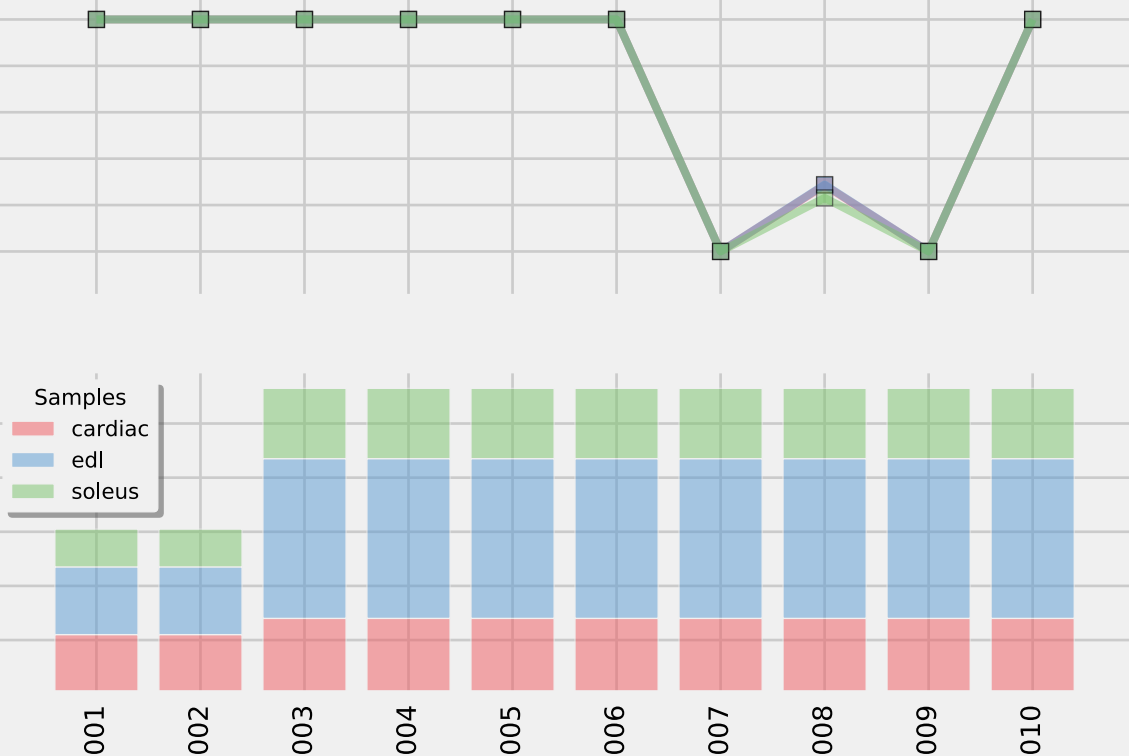



# Trpm7

FL Match / Total

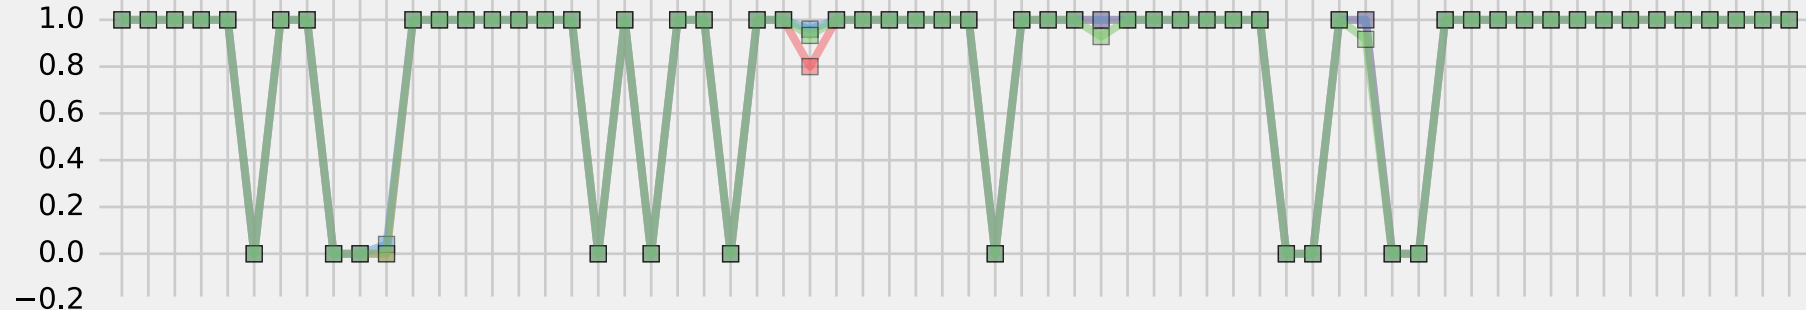

Total FL Reads

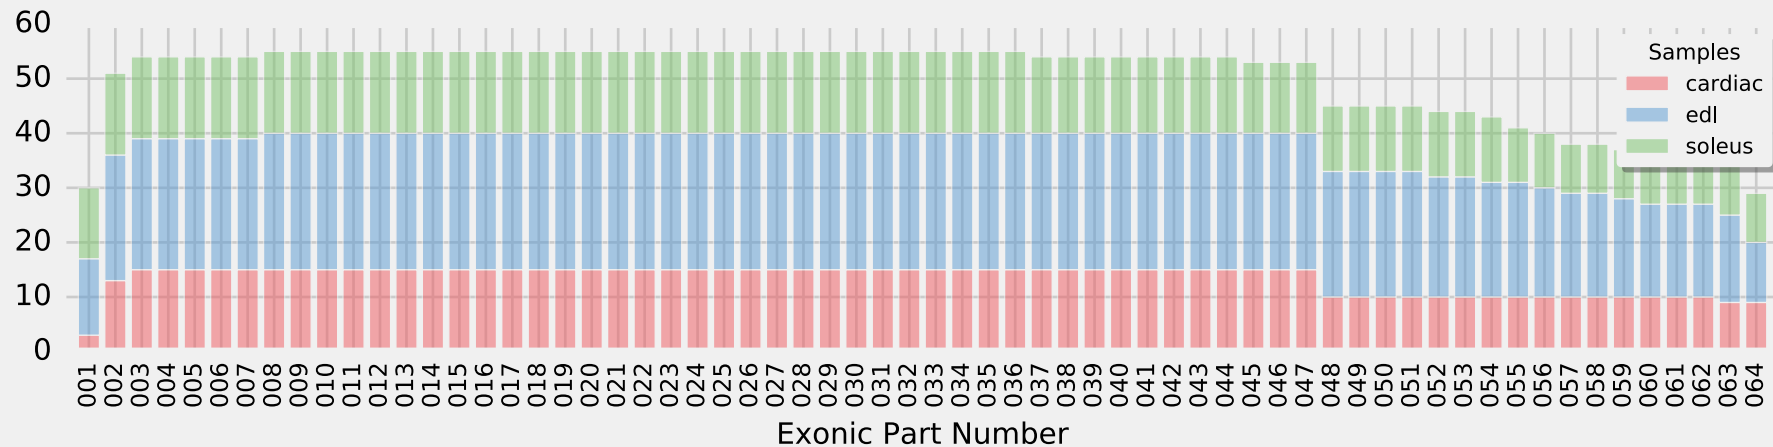

# Tsc2

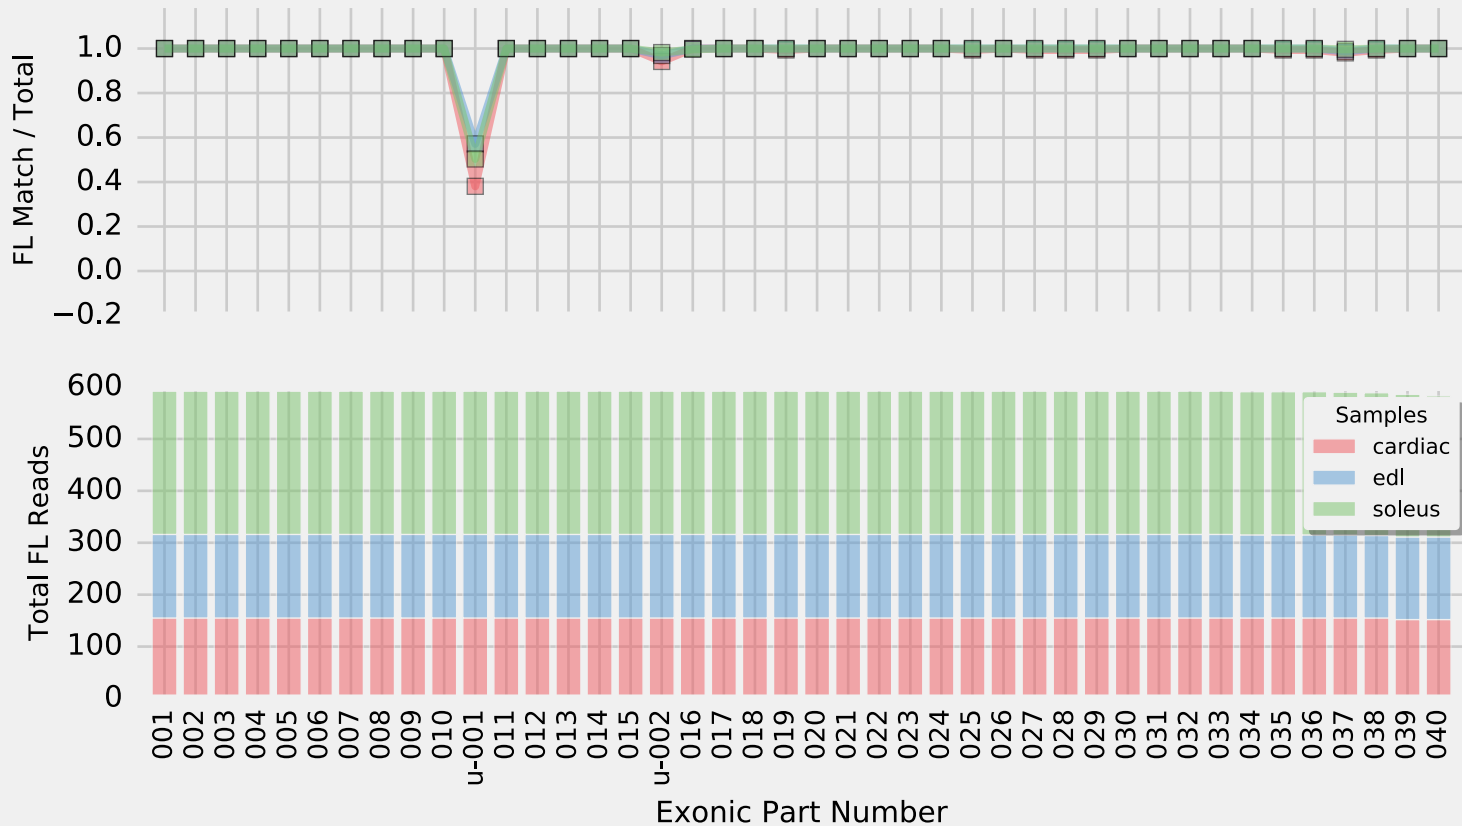

# Ttc37

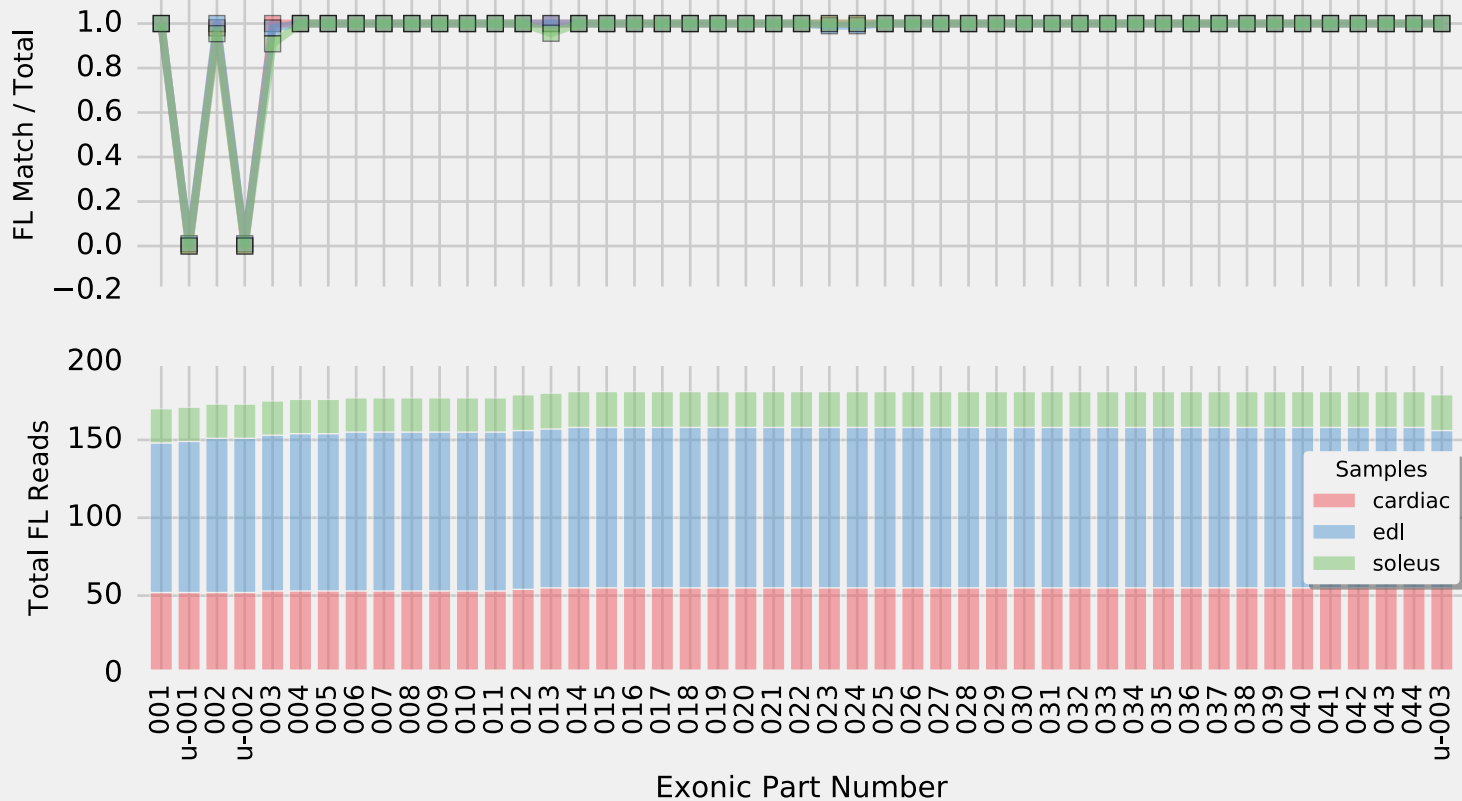

# TtII7

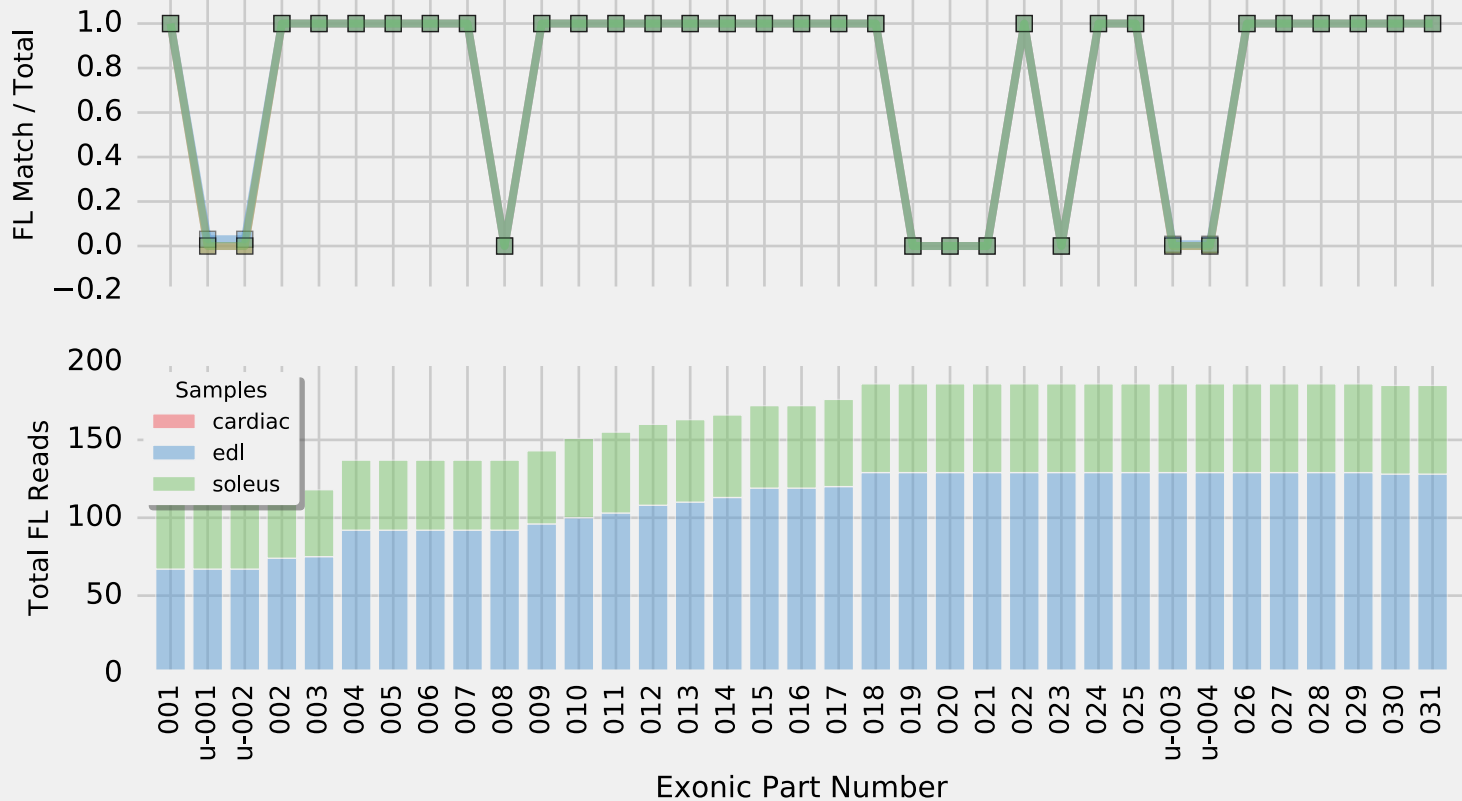



# Tulp4

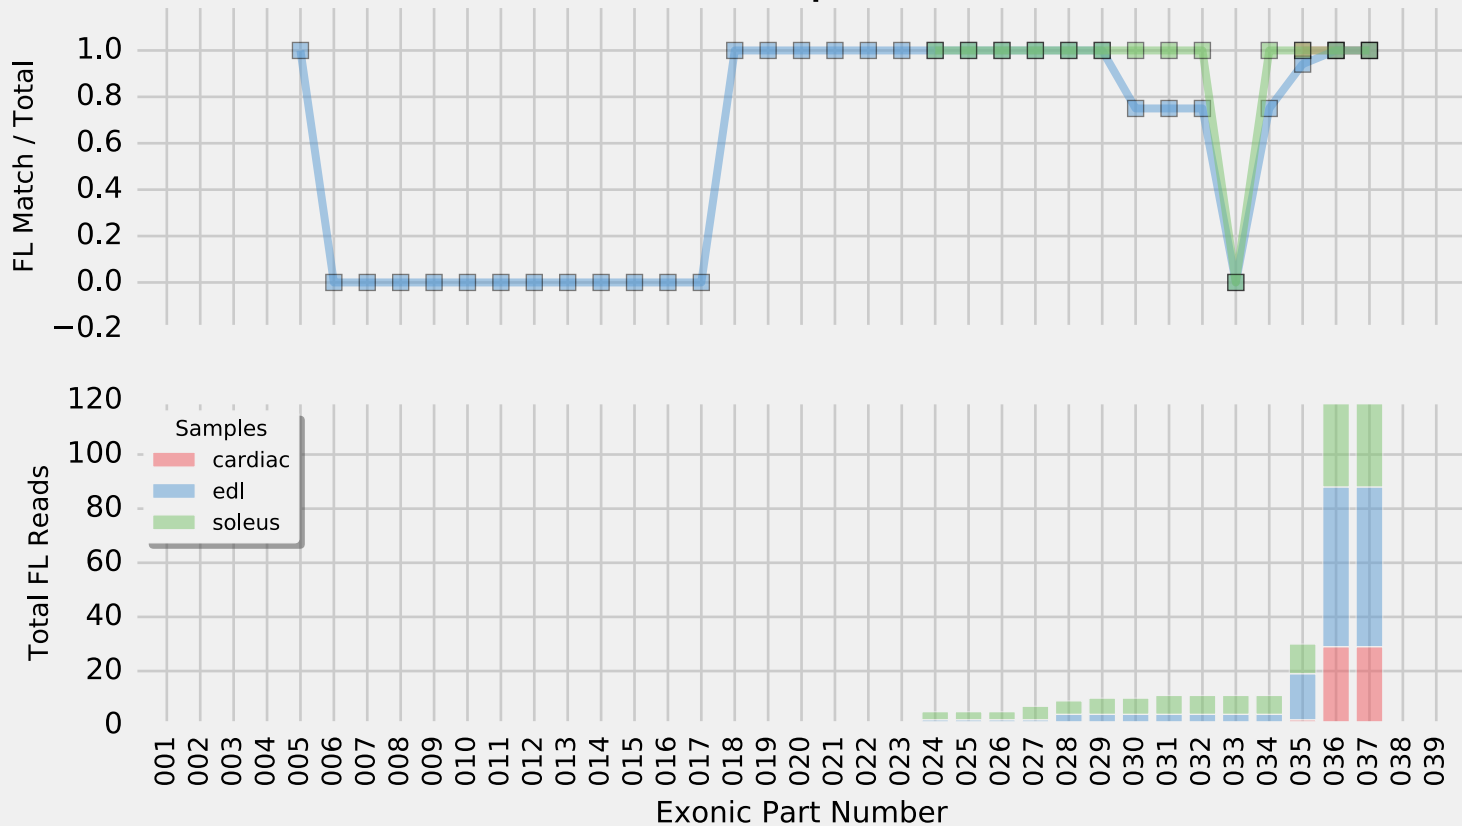

# TxInb

FL Match / Total

1.0  
0.8  
0.6  
0.4  
0.2  
0.0  
-0.2

Total FL Reads

100  
80  
60  
40  
20  
0

Samples

cardiac  
edl  
soleus

001

002

003

004

005

006

007

008

009

010

011

012

Exonic Part Number

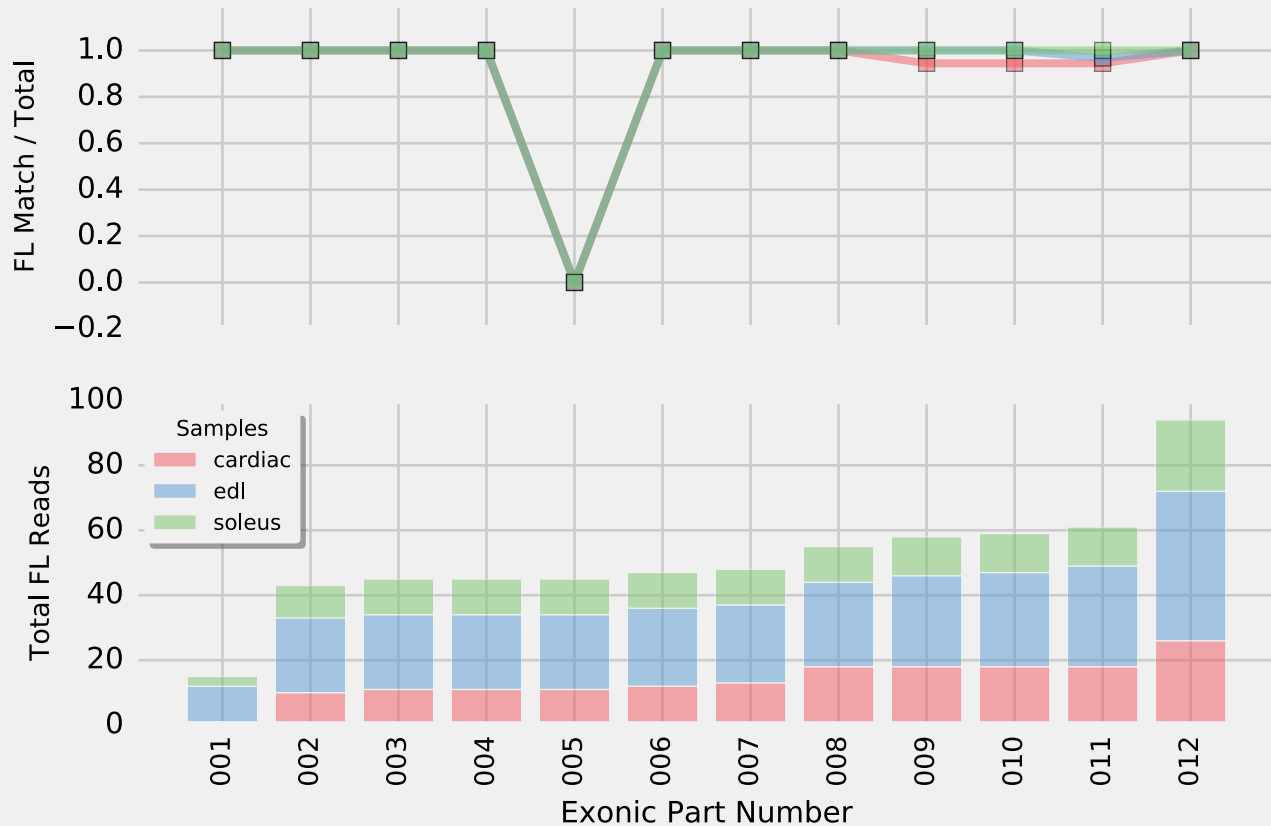

# Ube4a

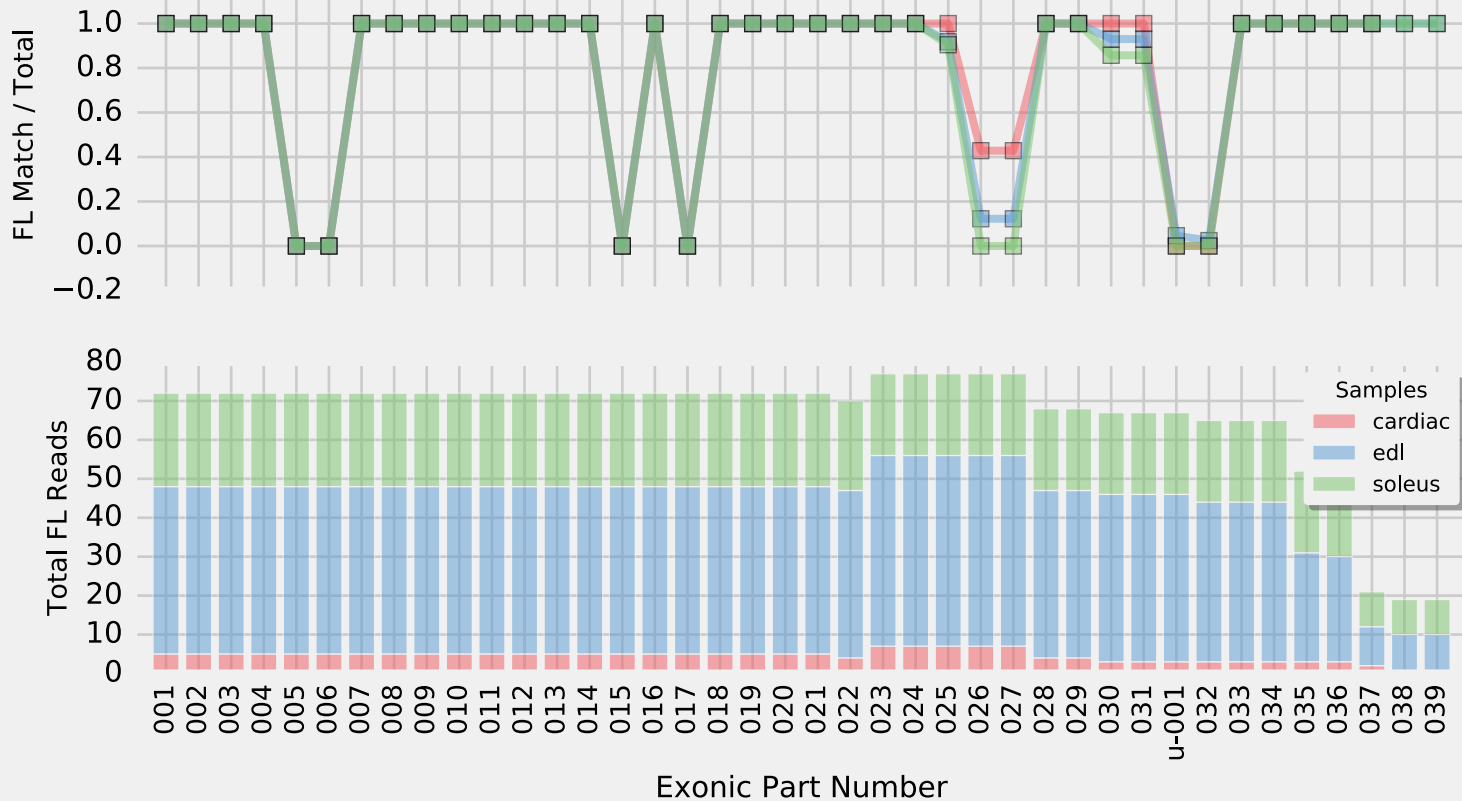



# Ubr1

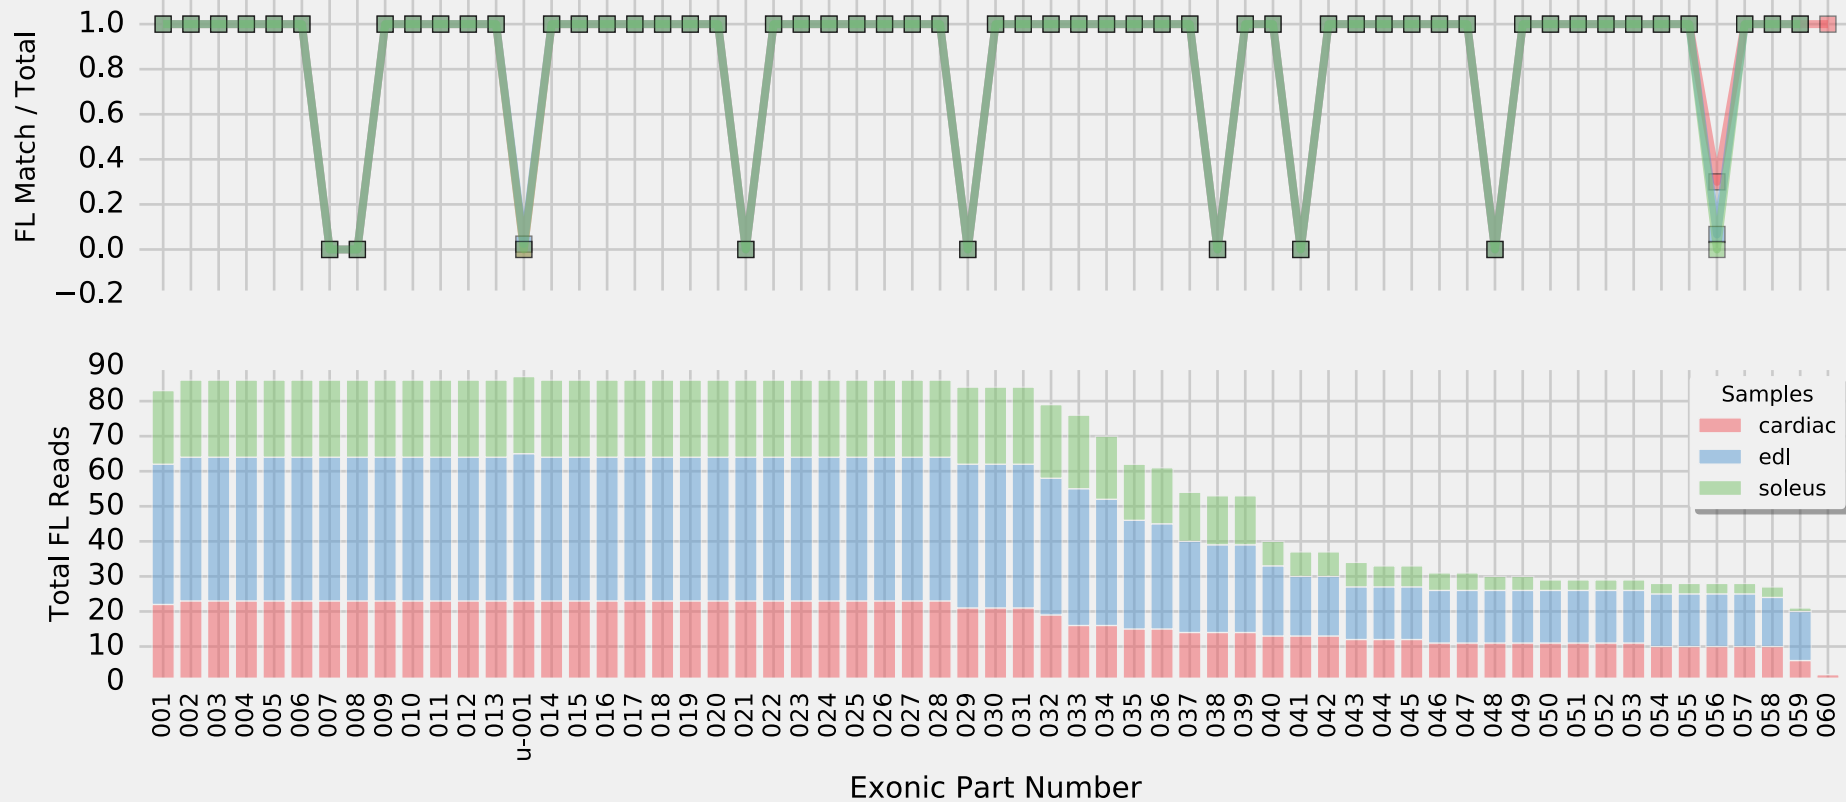

# Ubr2

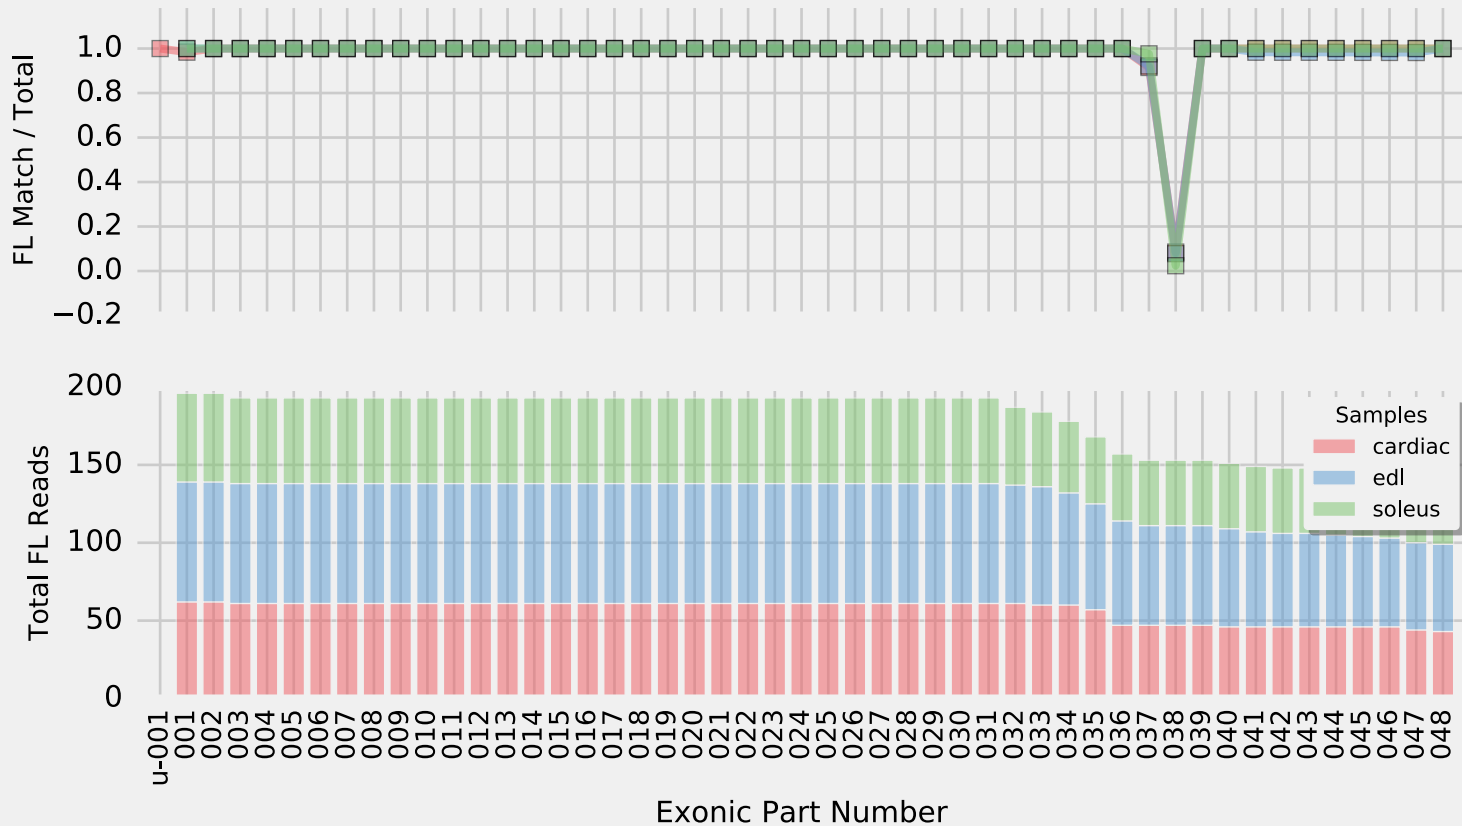

# Ubr3

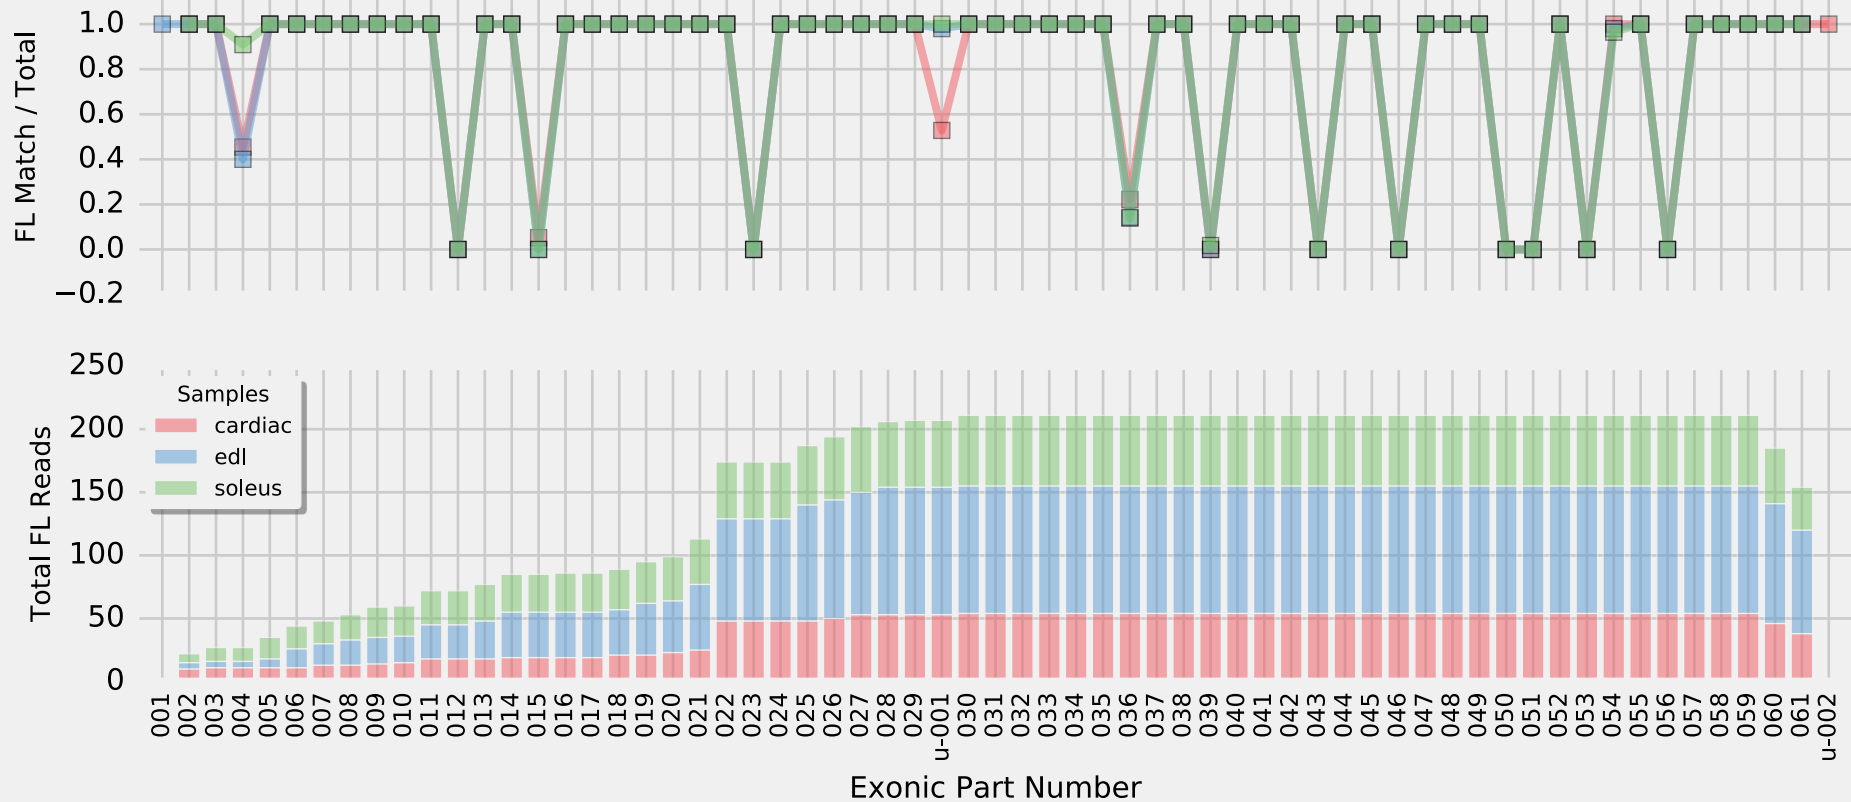

# Ubr4

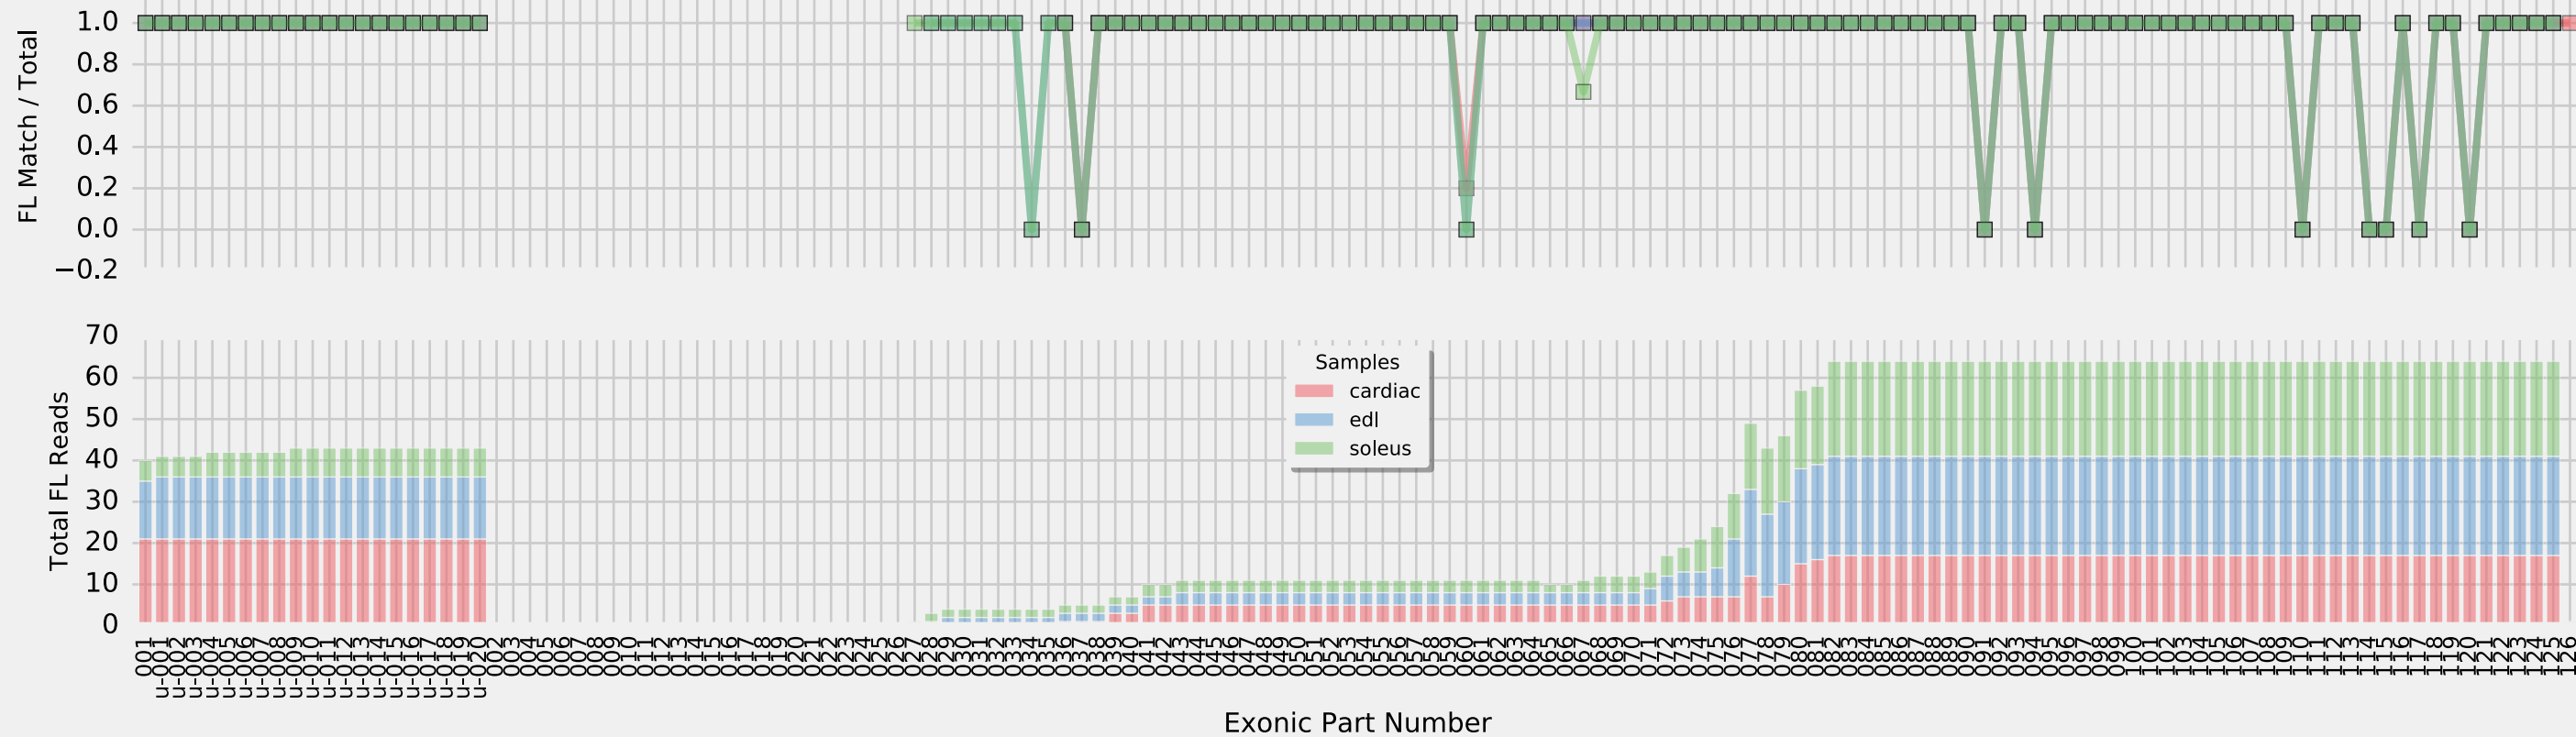

# Ubr5

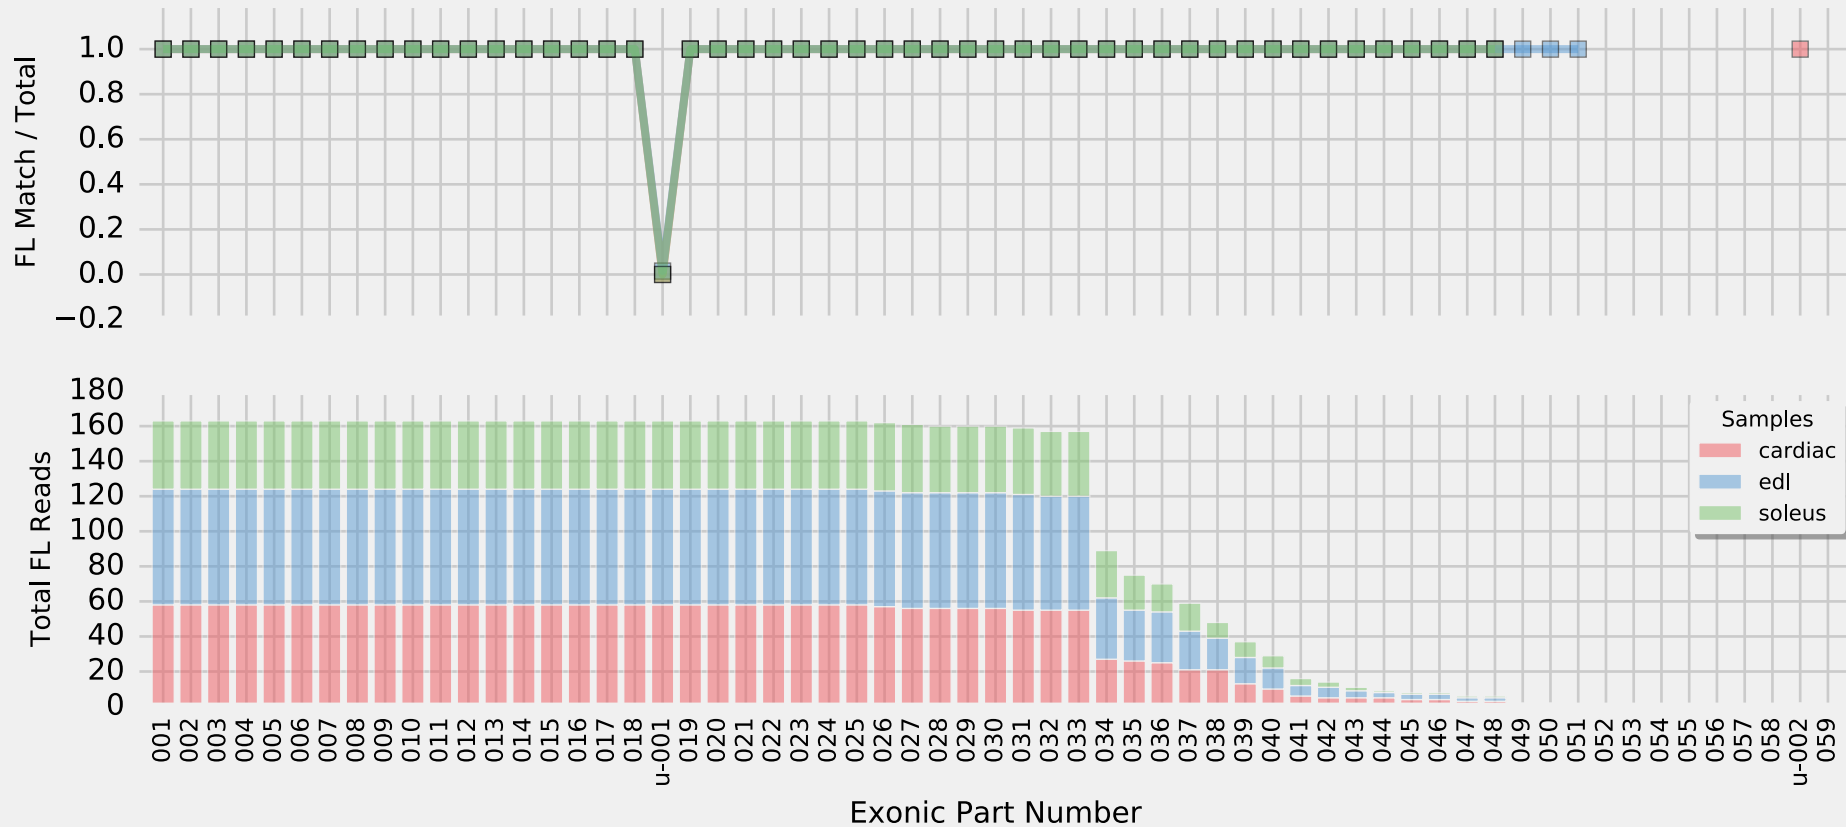

# Uggt1

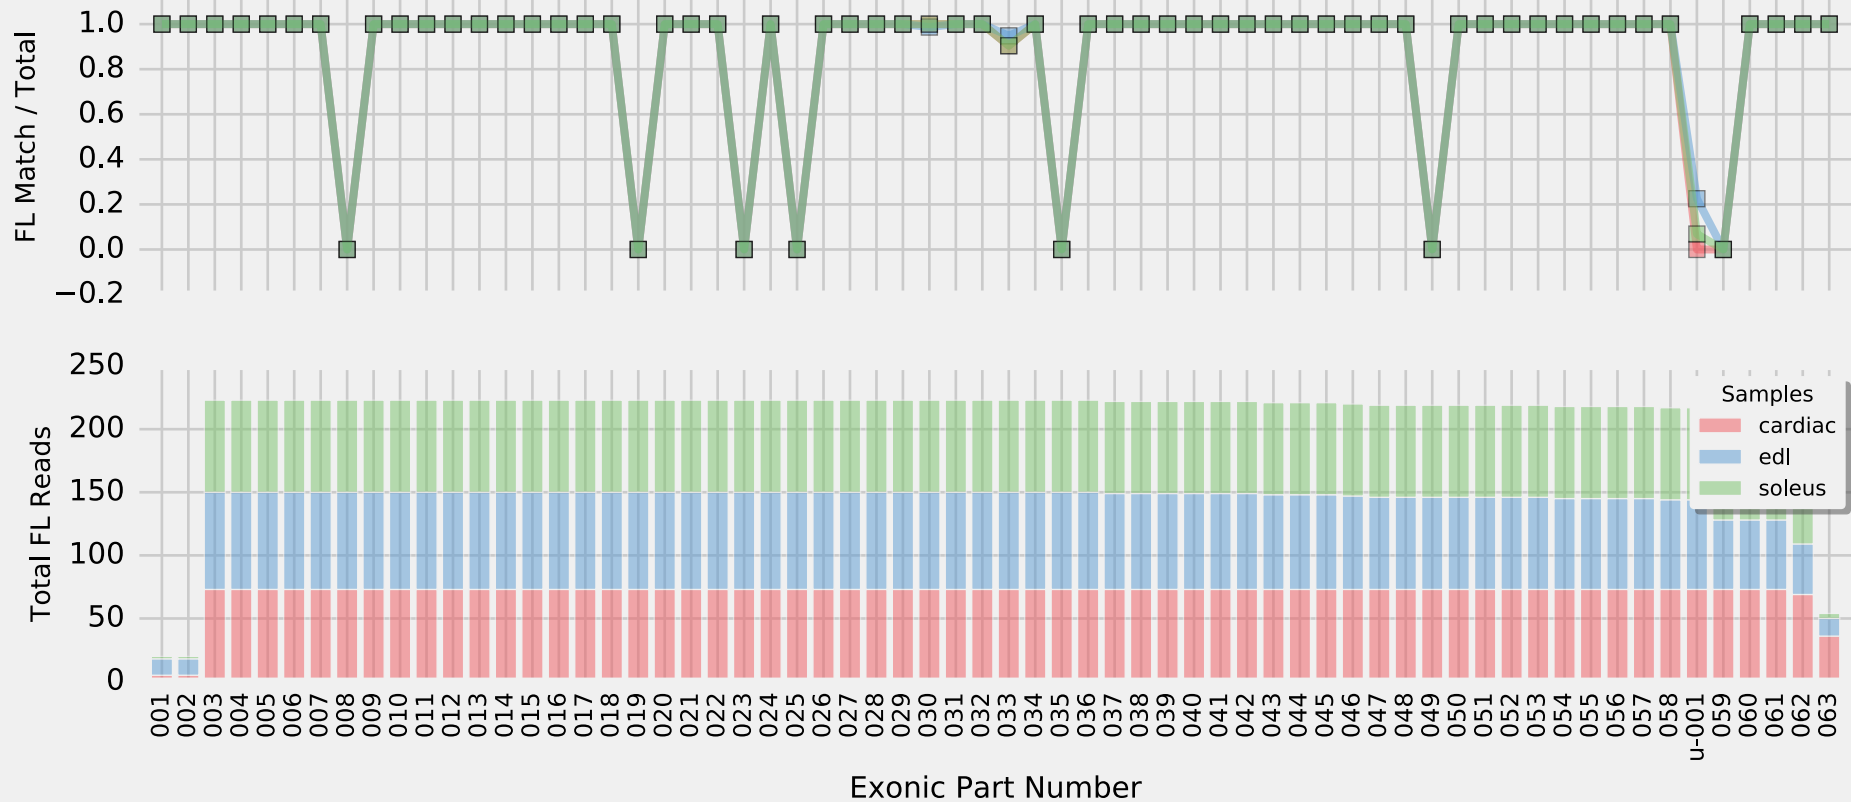

# Uhrf1bp1

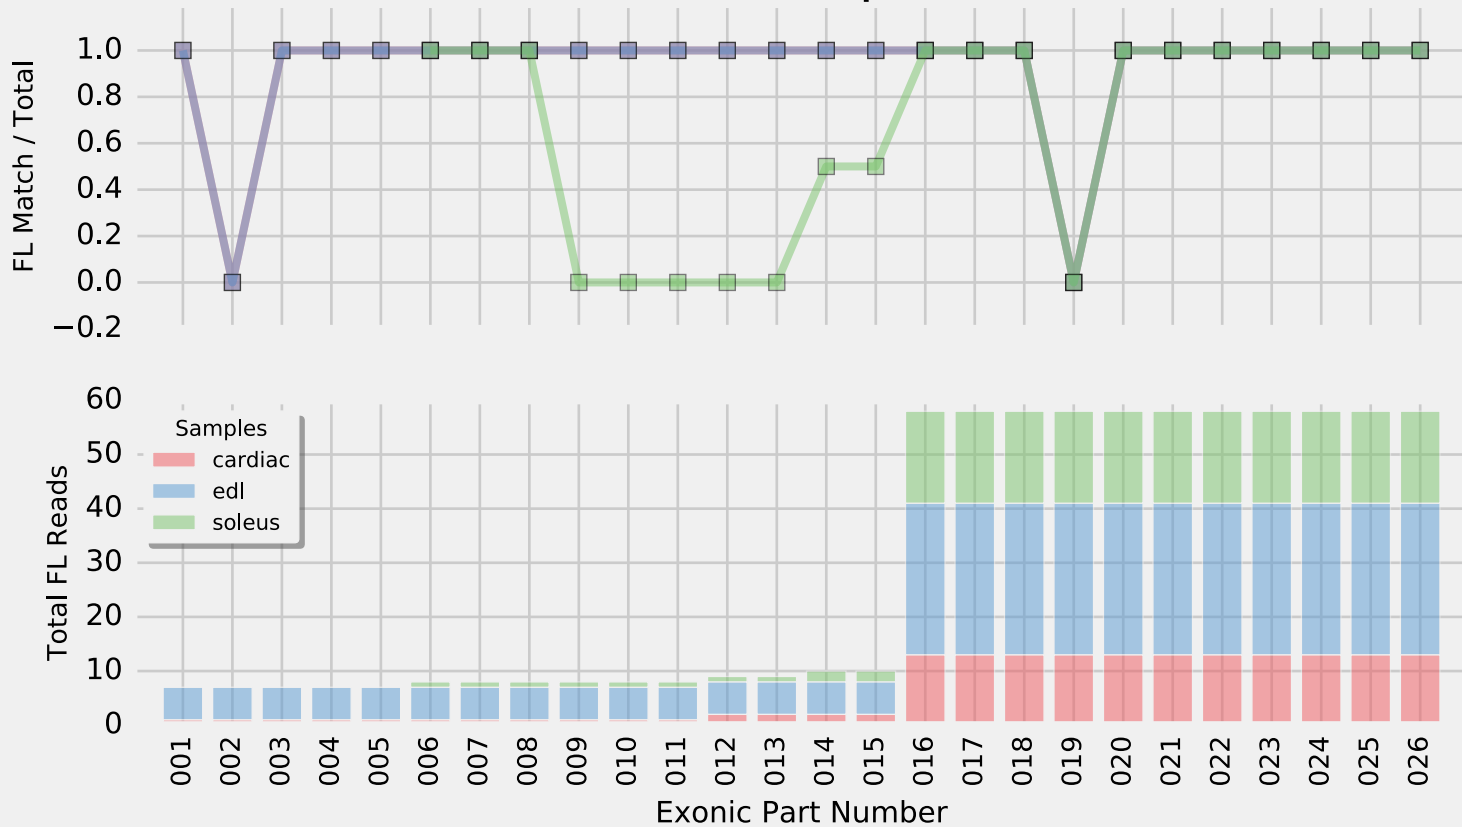

# Uhrf1bp1

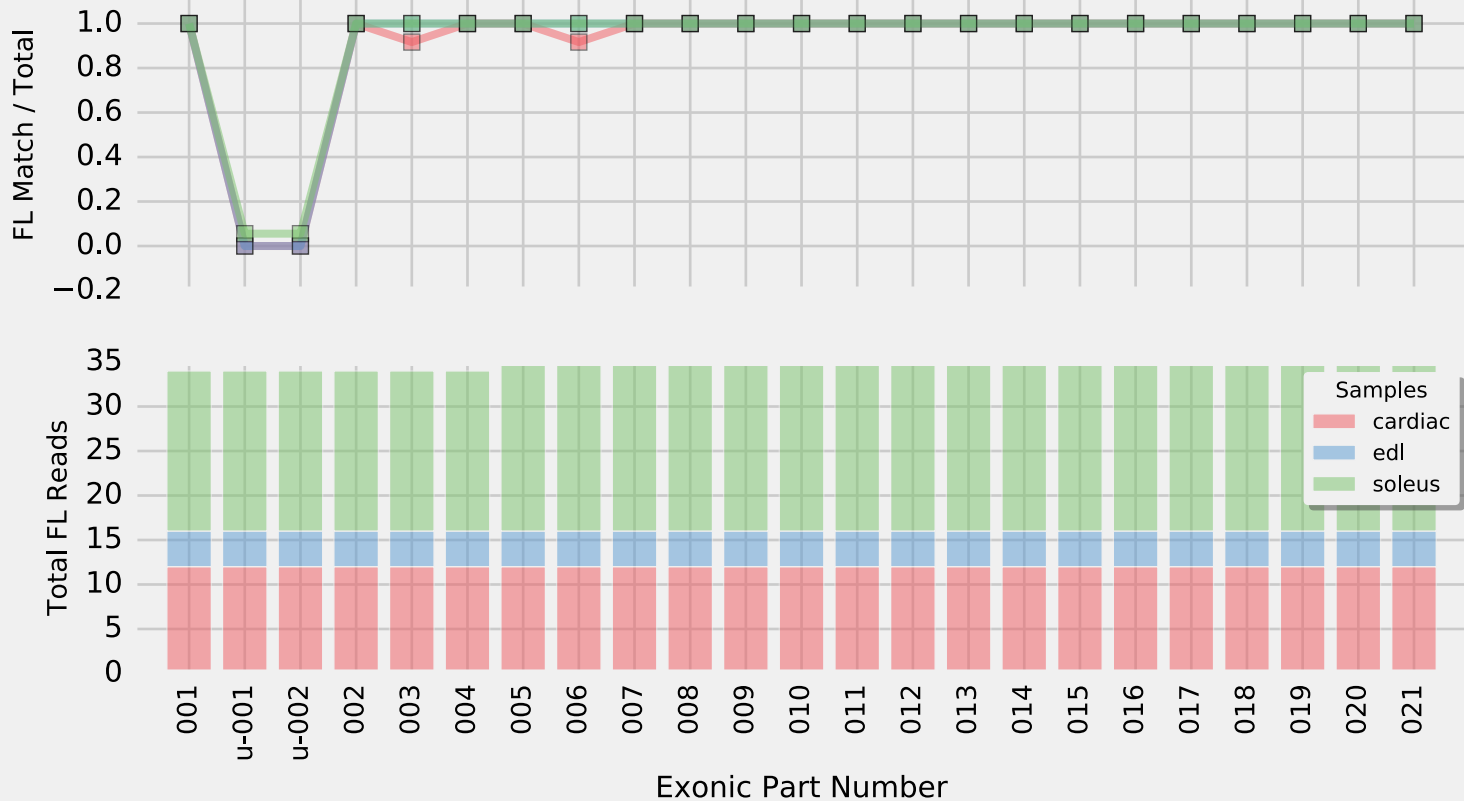



# Usf3

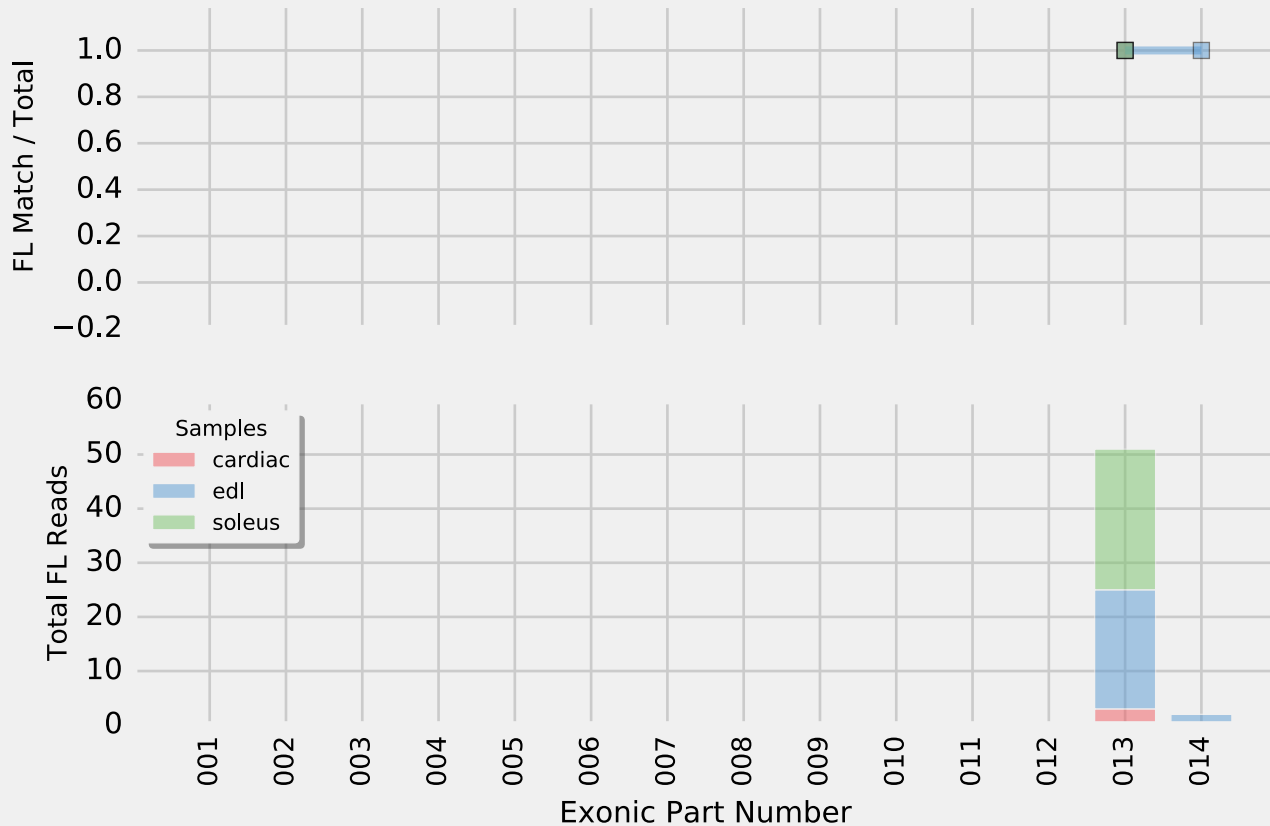

# Usp24

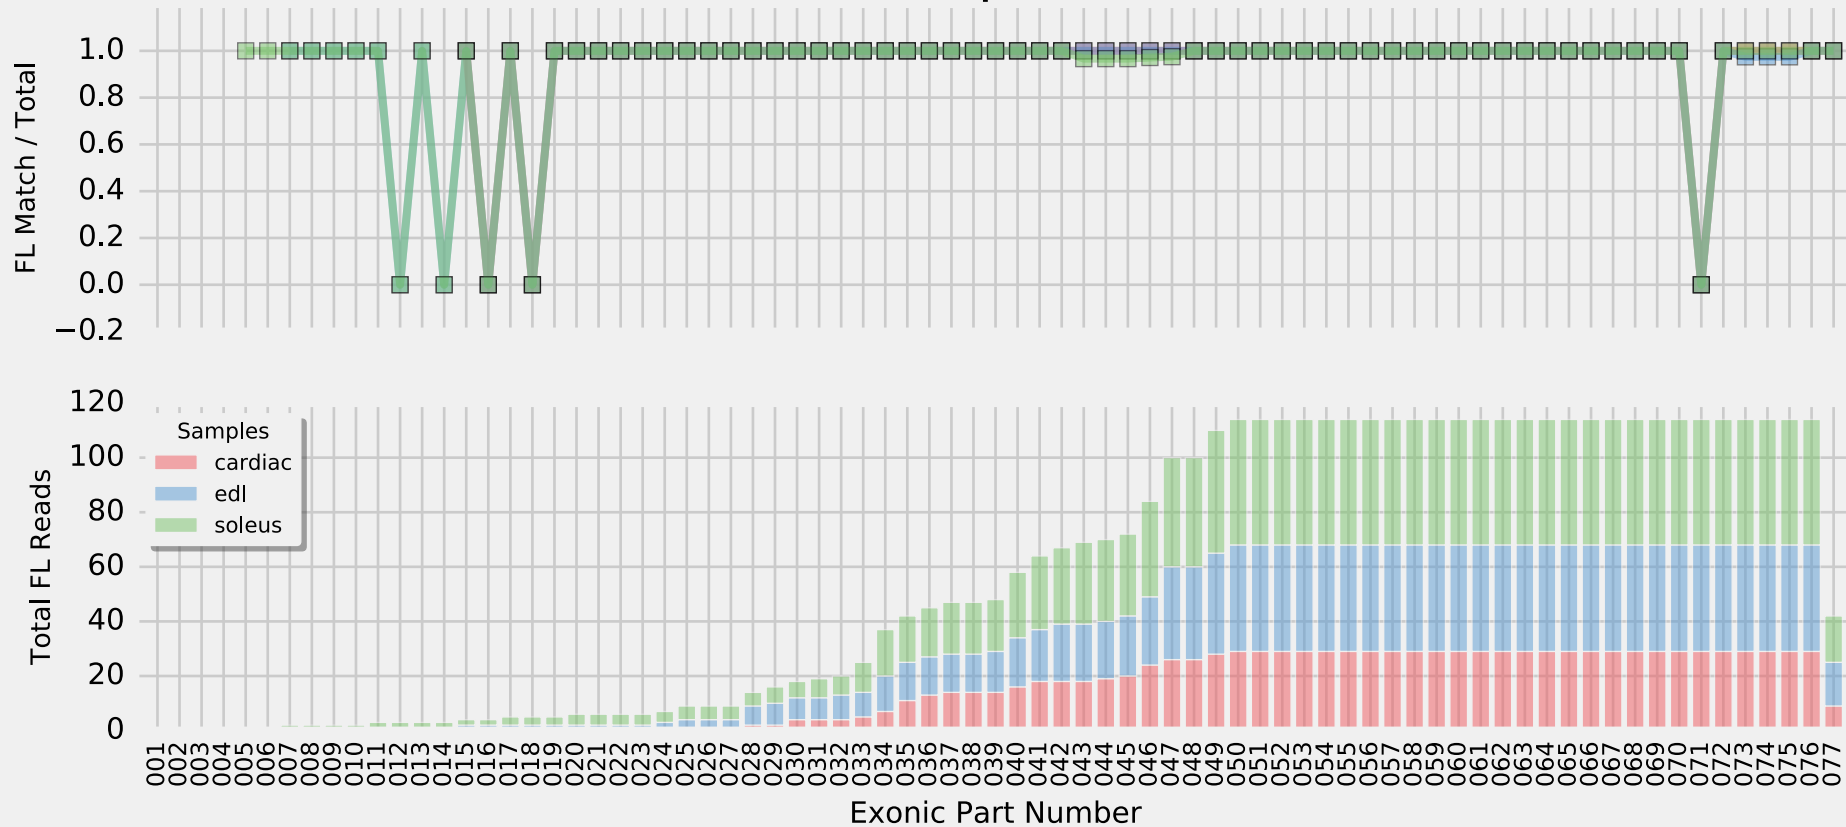

# Usp28

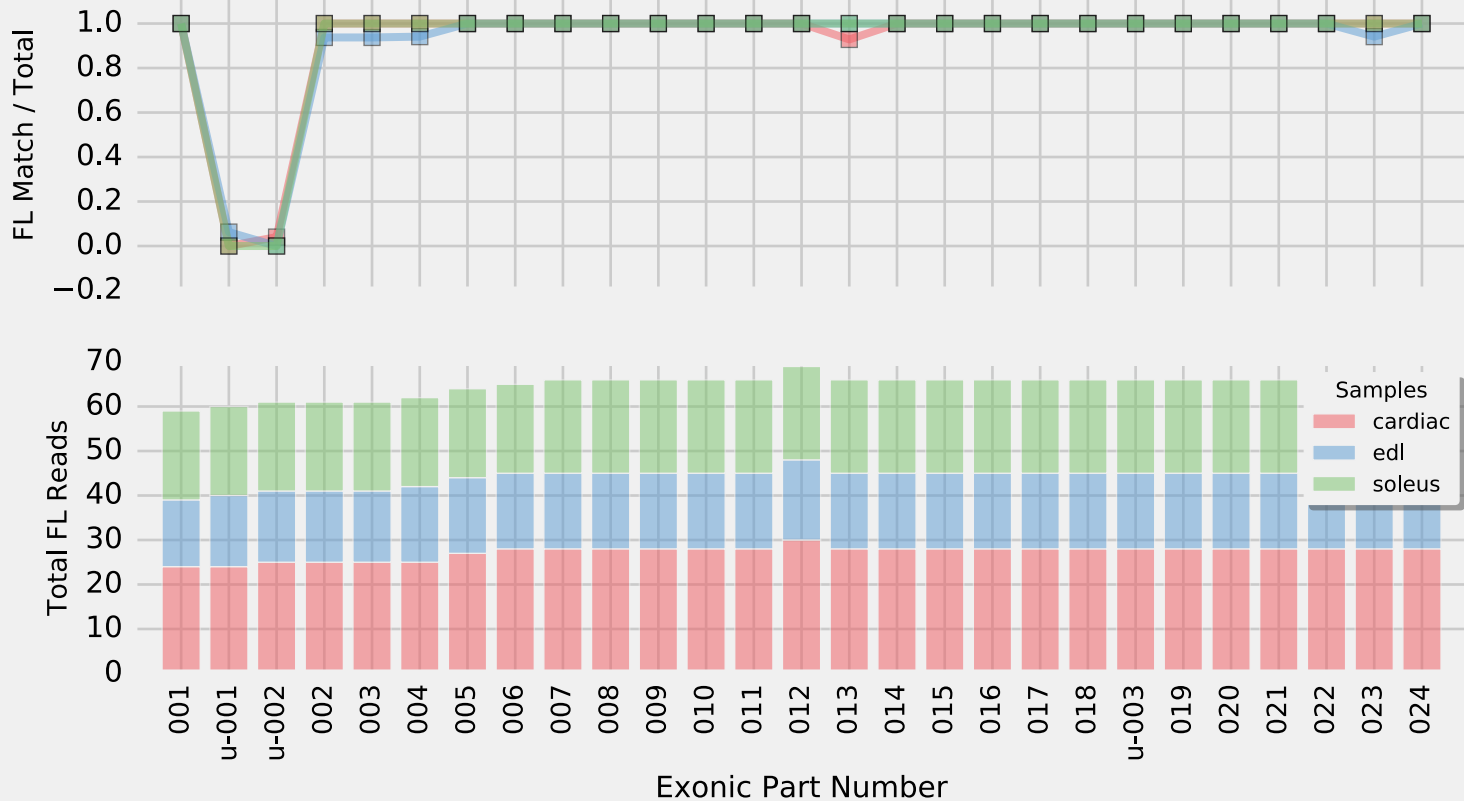

# Usp34

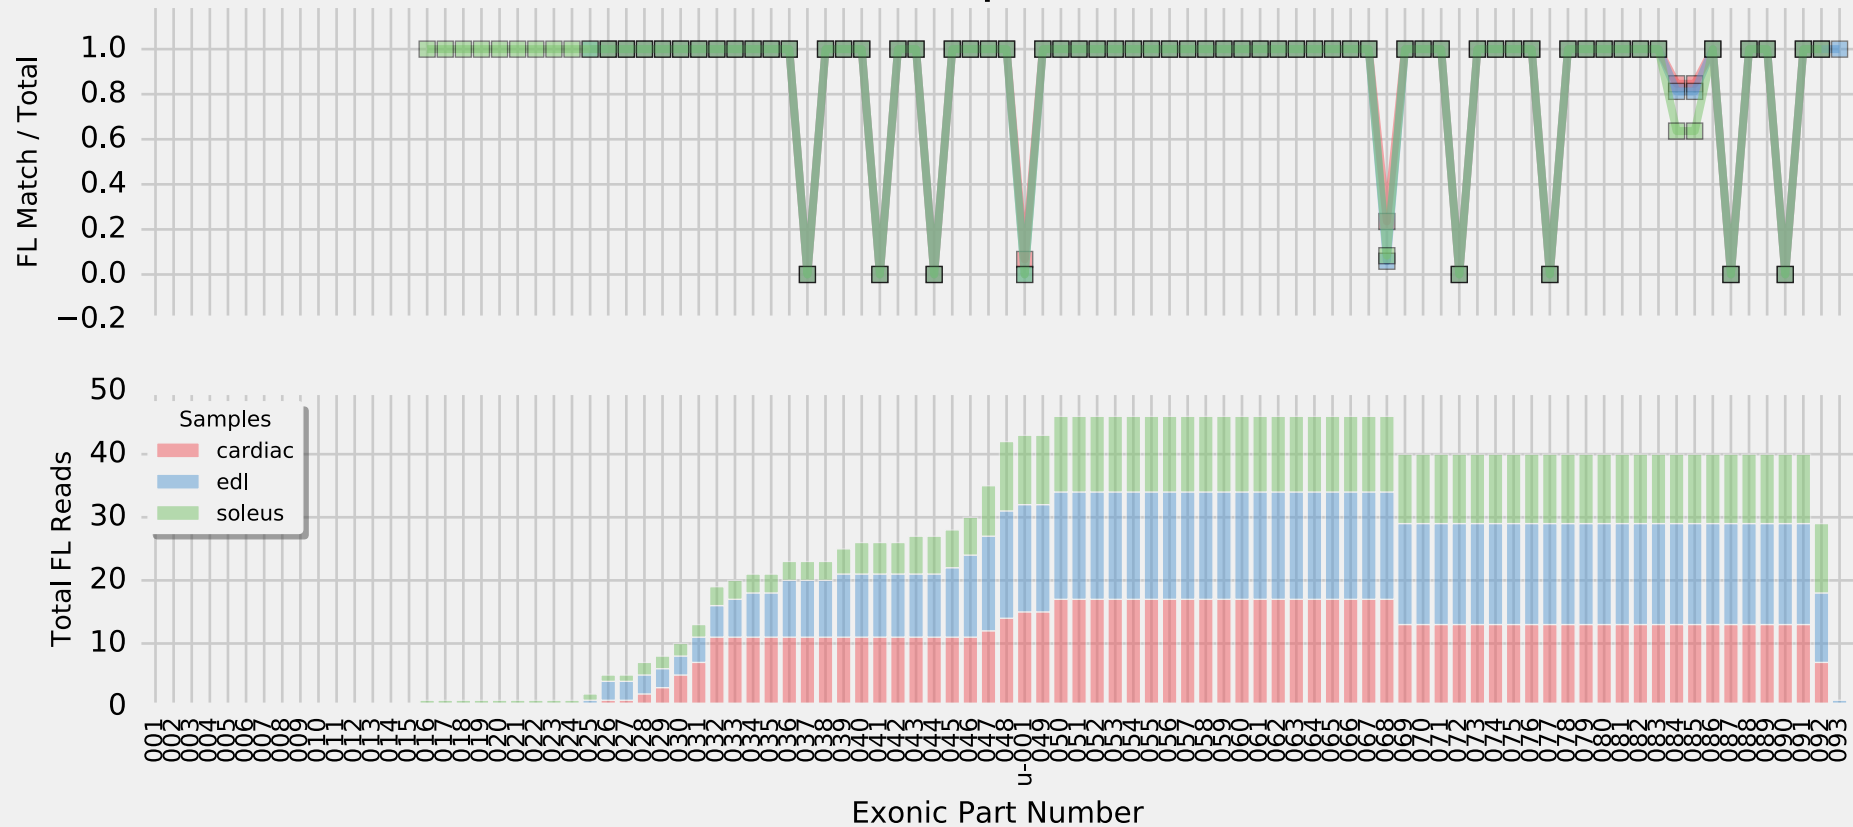

# Usp40

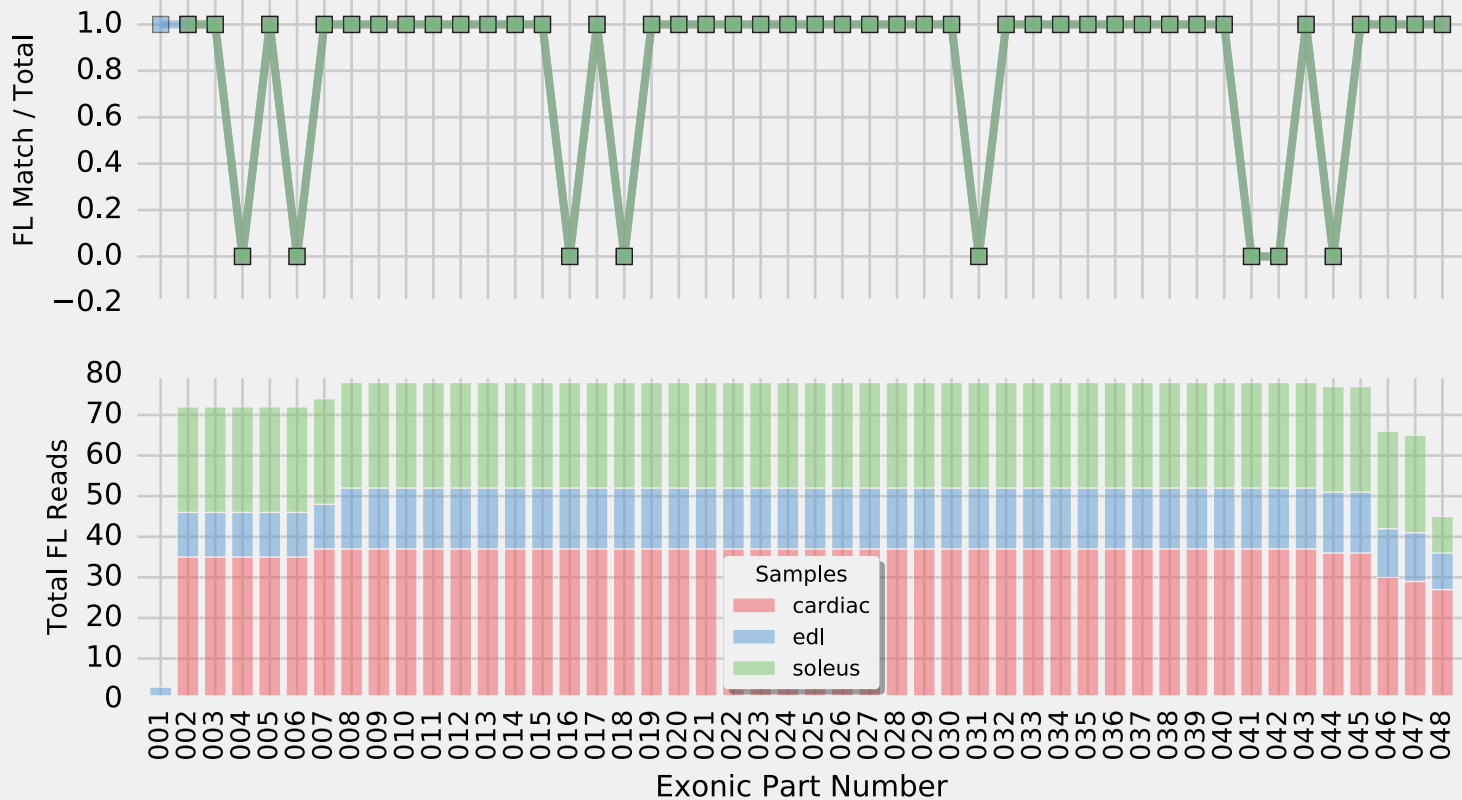

# Usp47

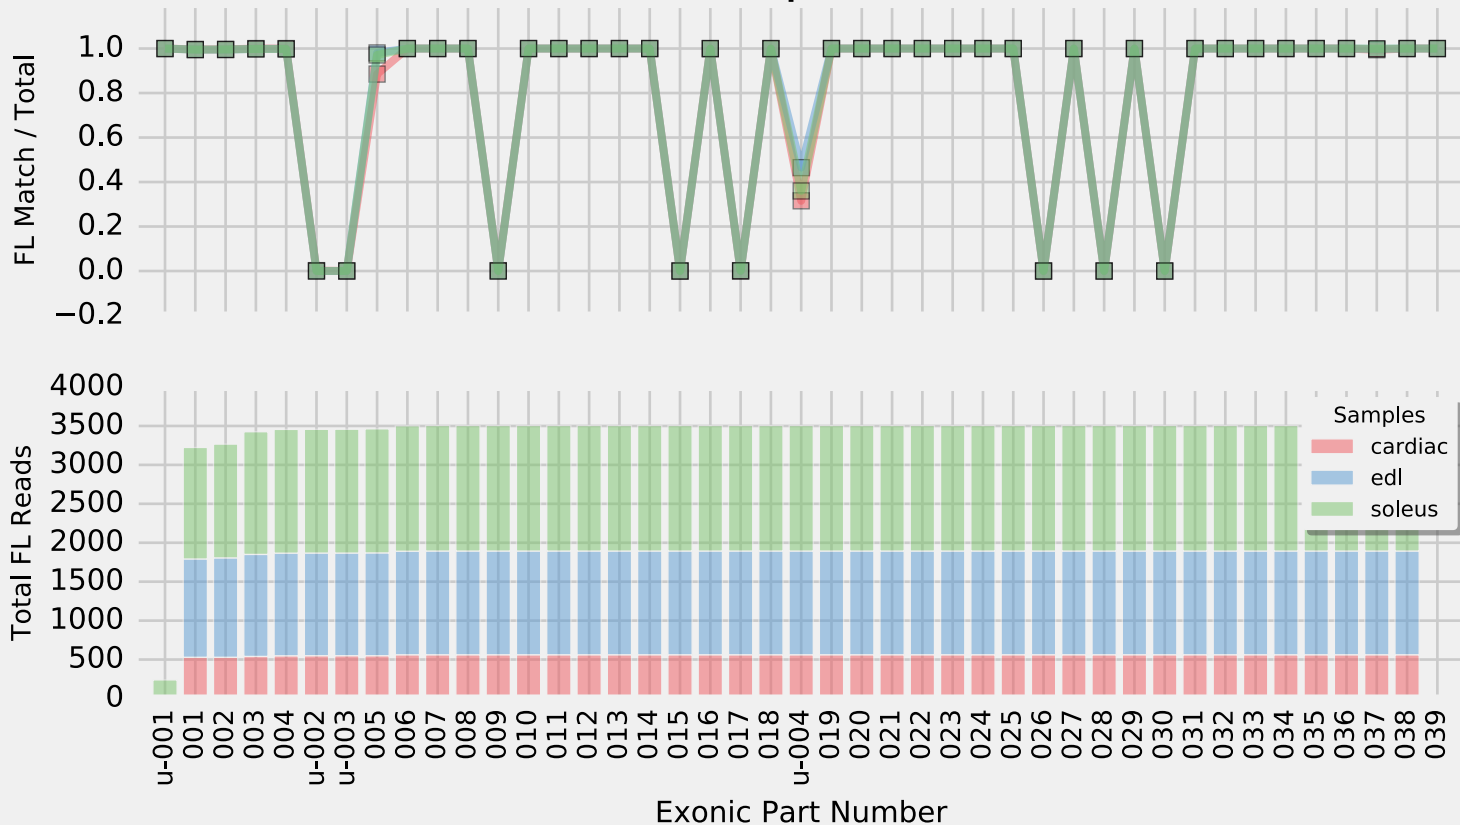

# Usp48

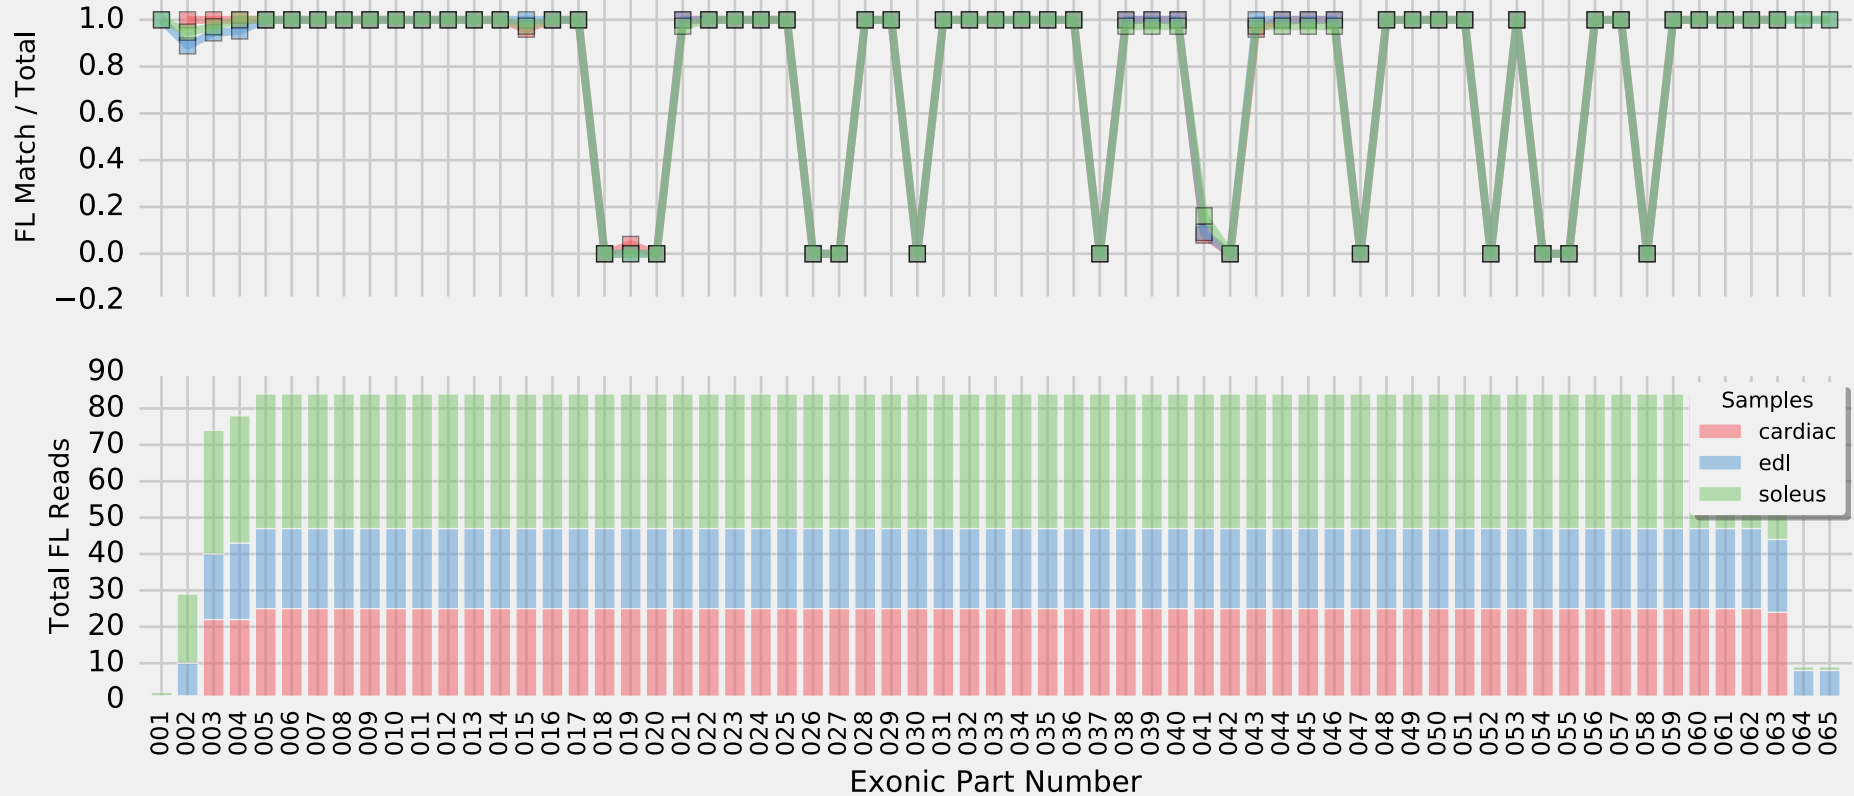

# Usp53

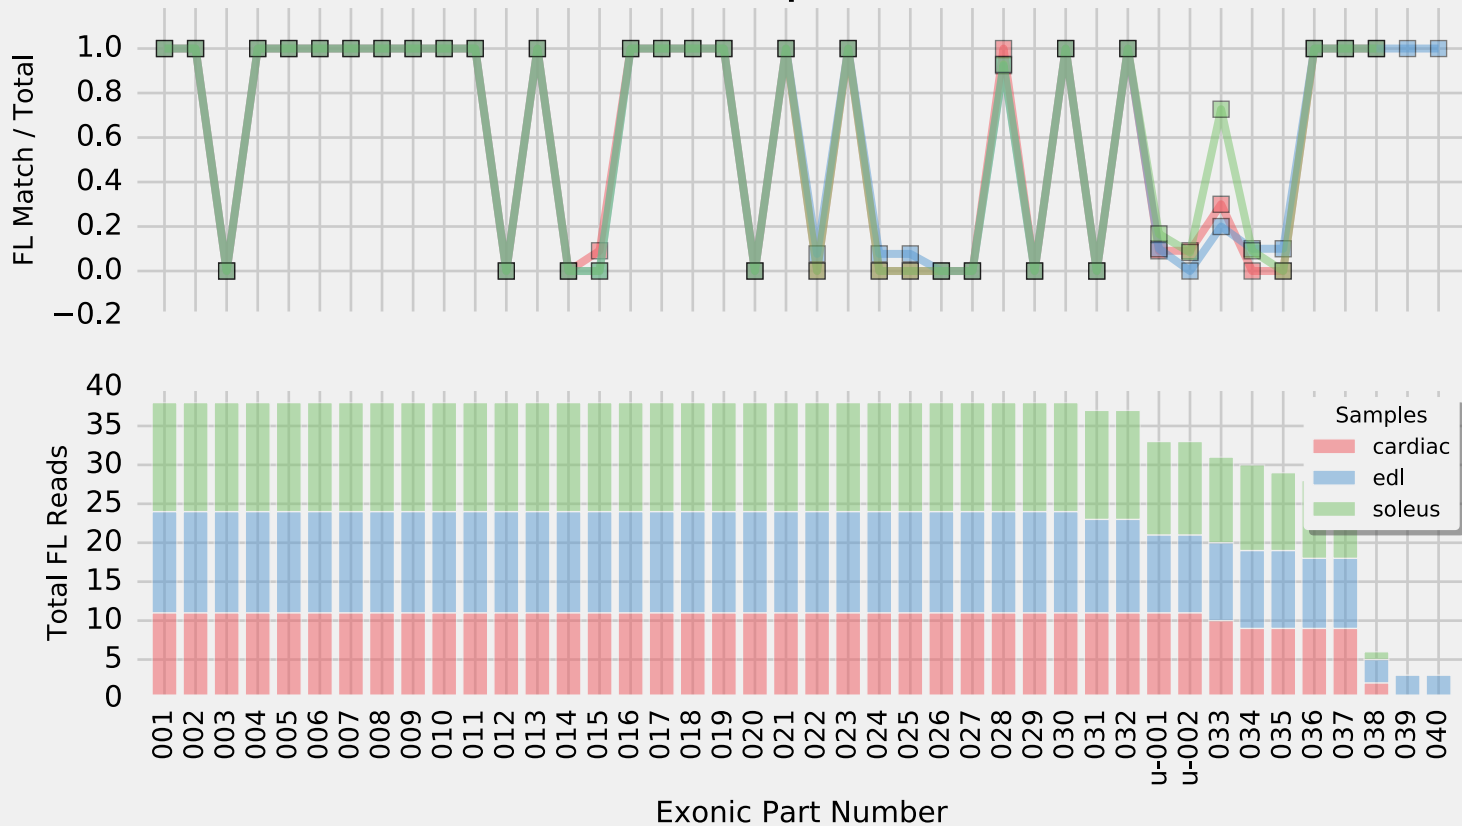



# Usp9x

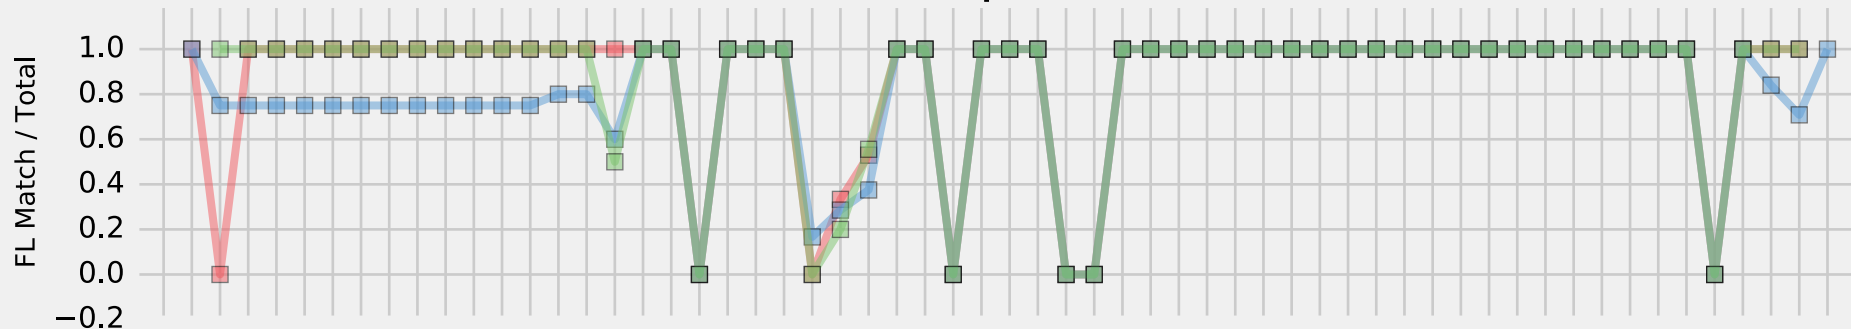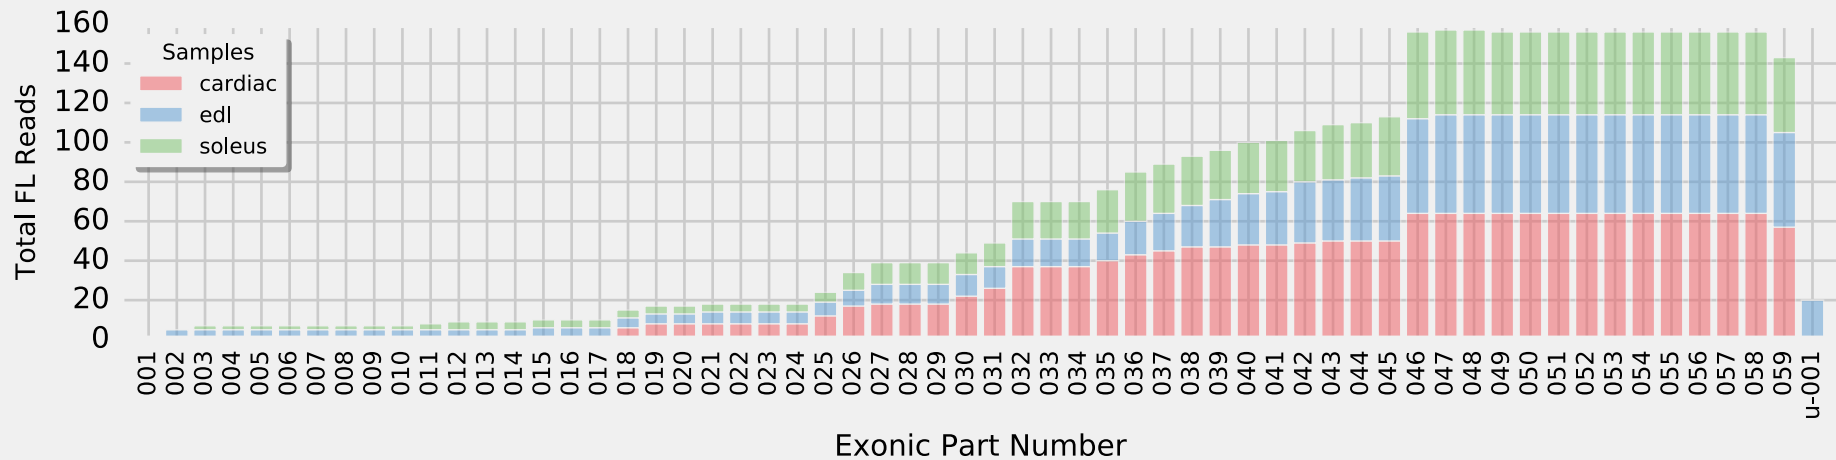

# Utp20

FL Match / Total

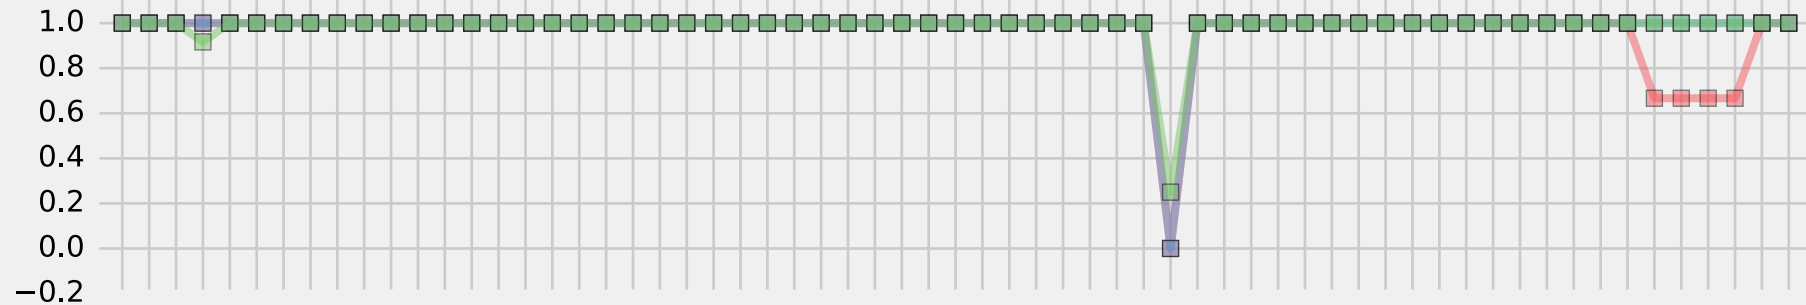

Total FL Reads

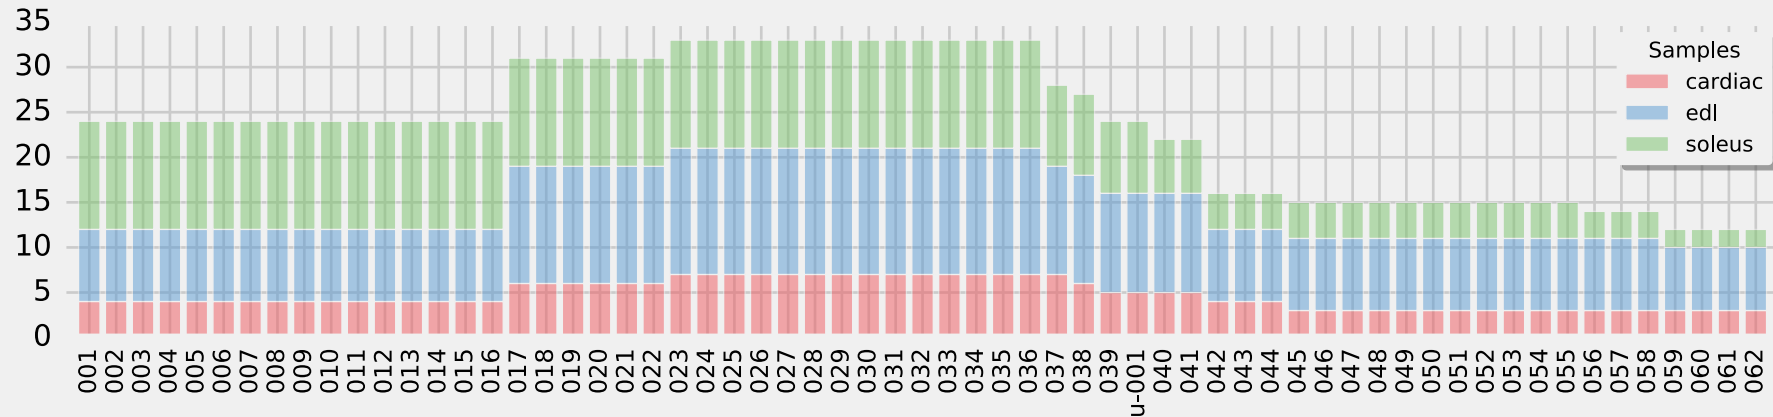

Exonic Part Number

Samples

cardiac

edl

soleus

# Utrn

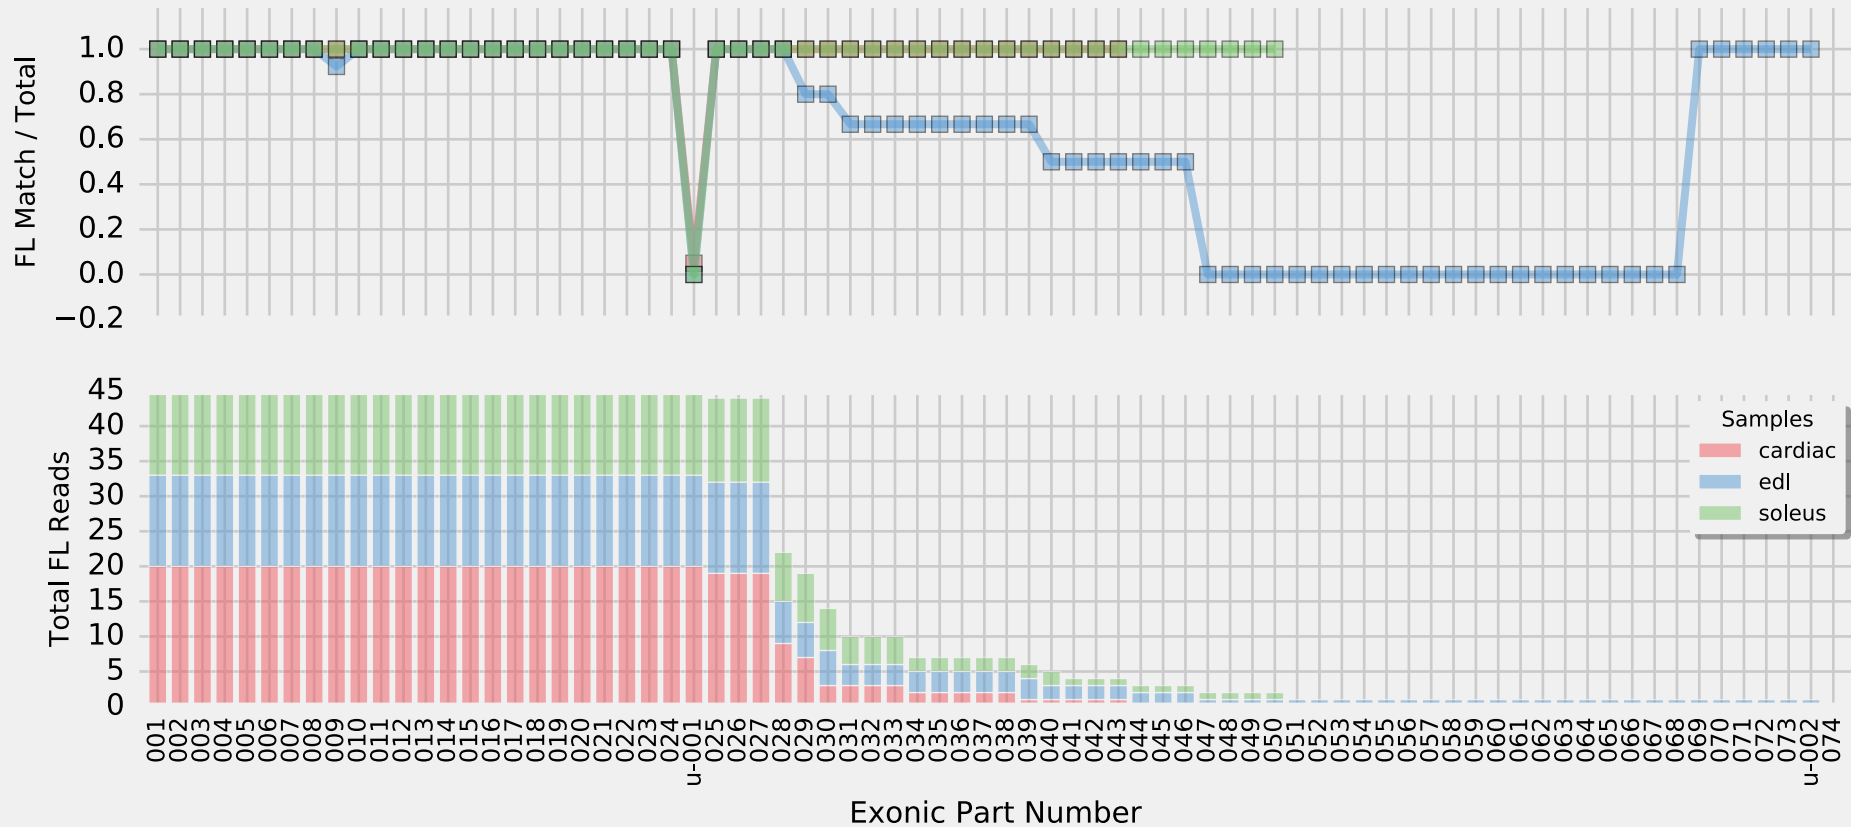

# Vcl

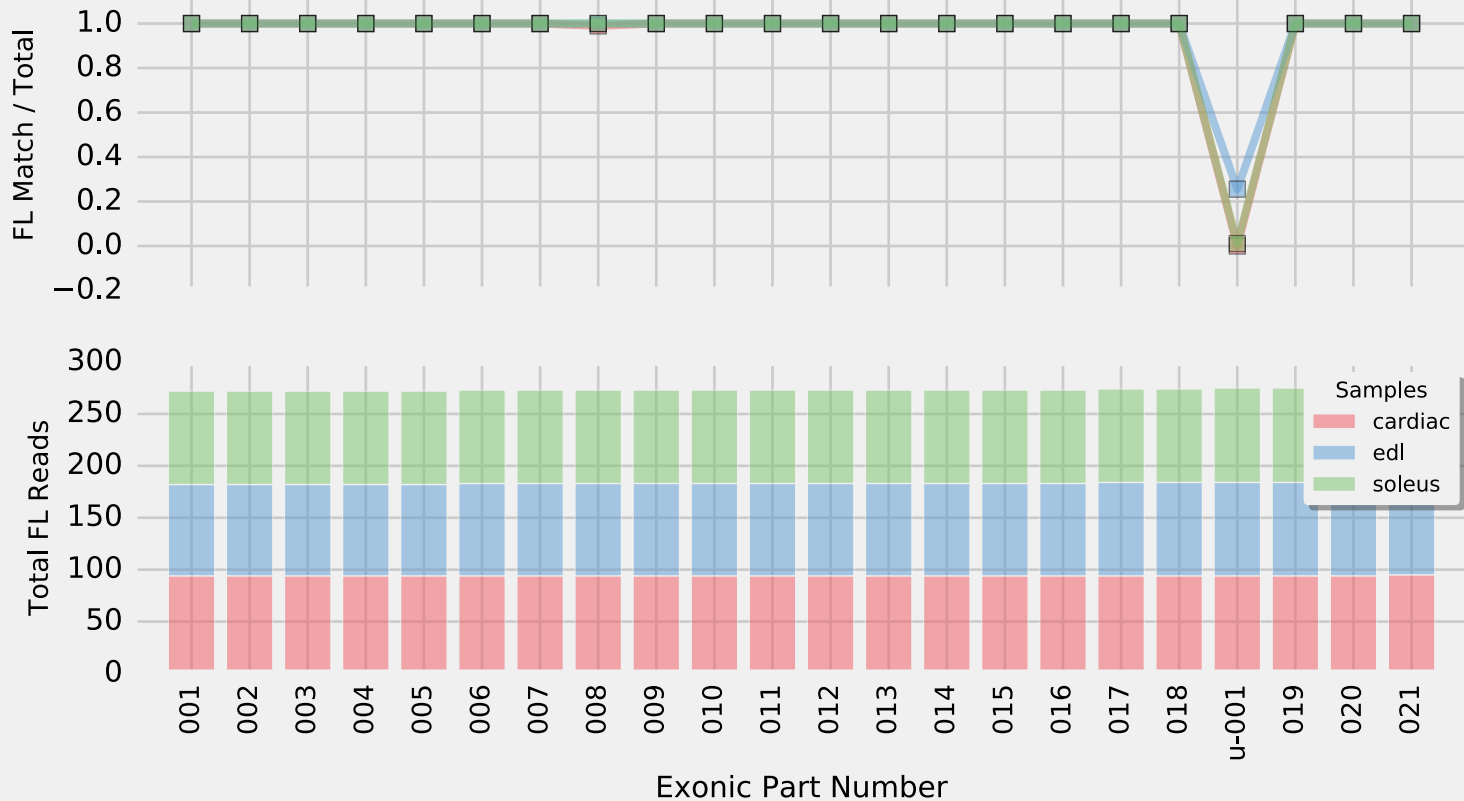

# Vprbp

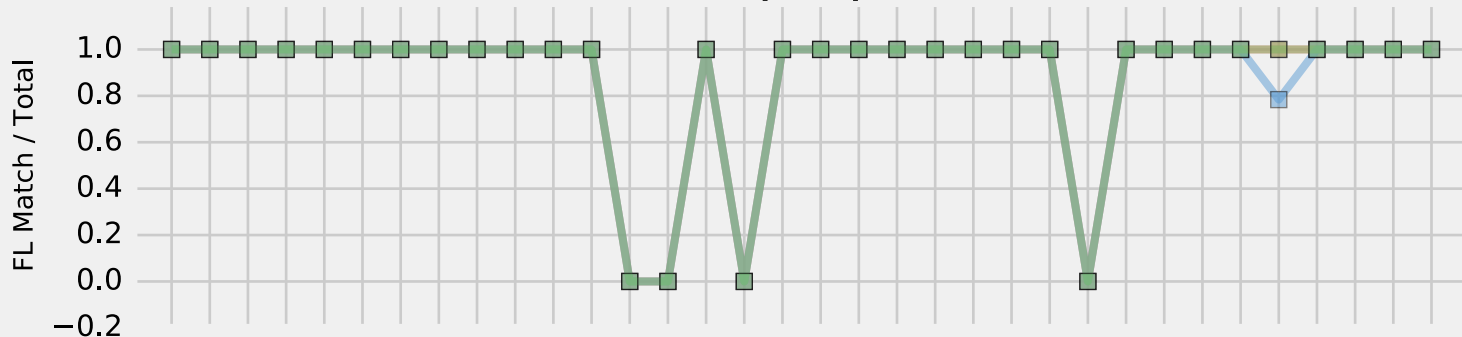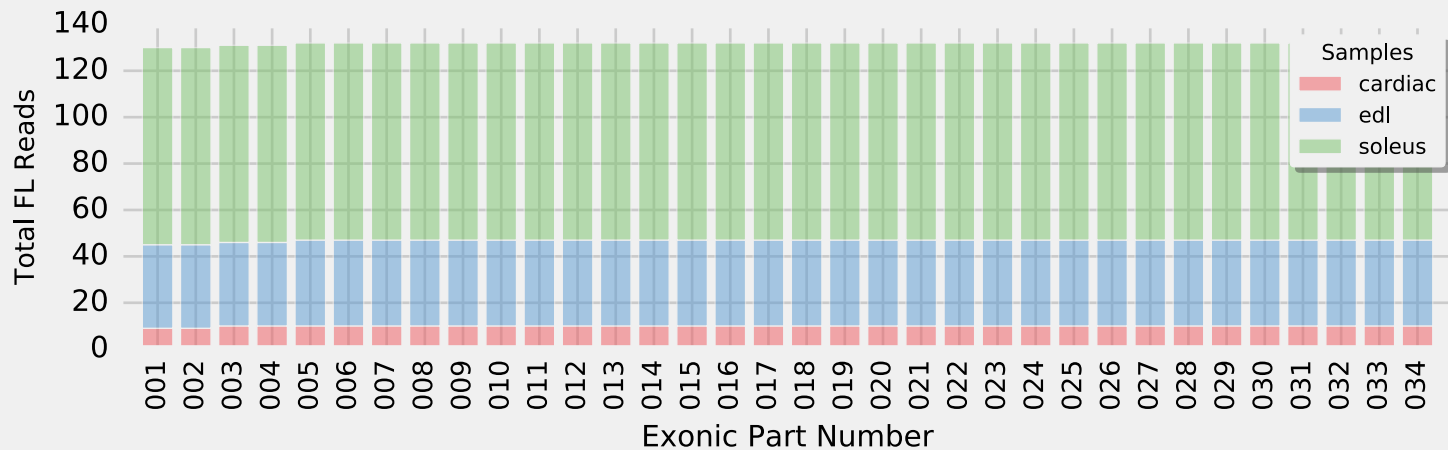

# Vps13d

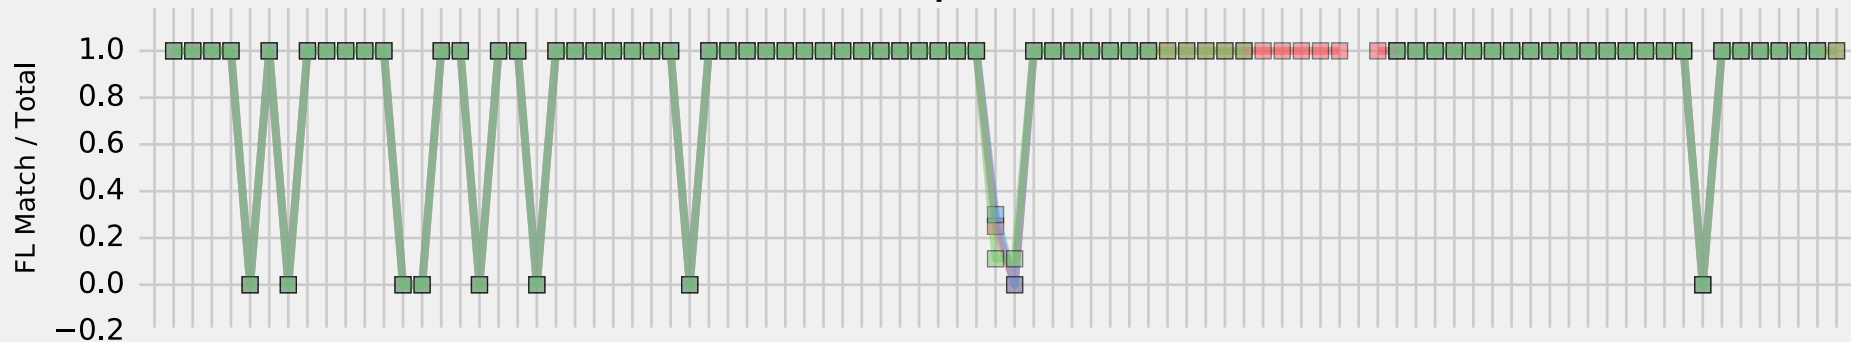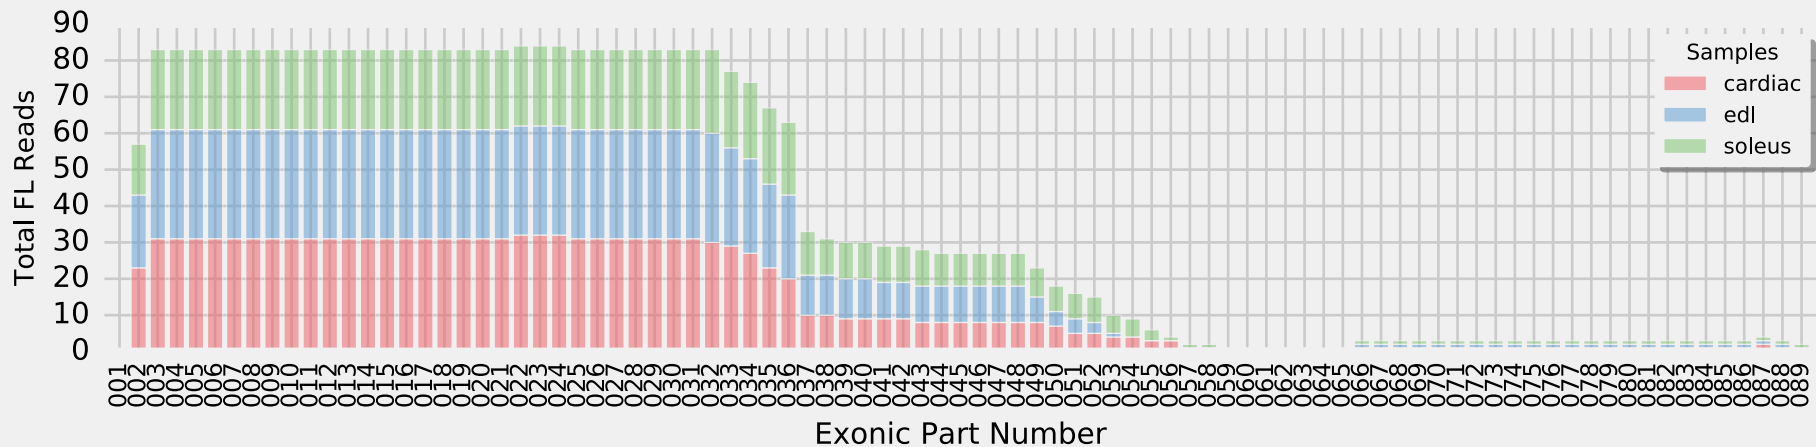

# Vwa8

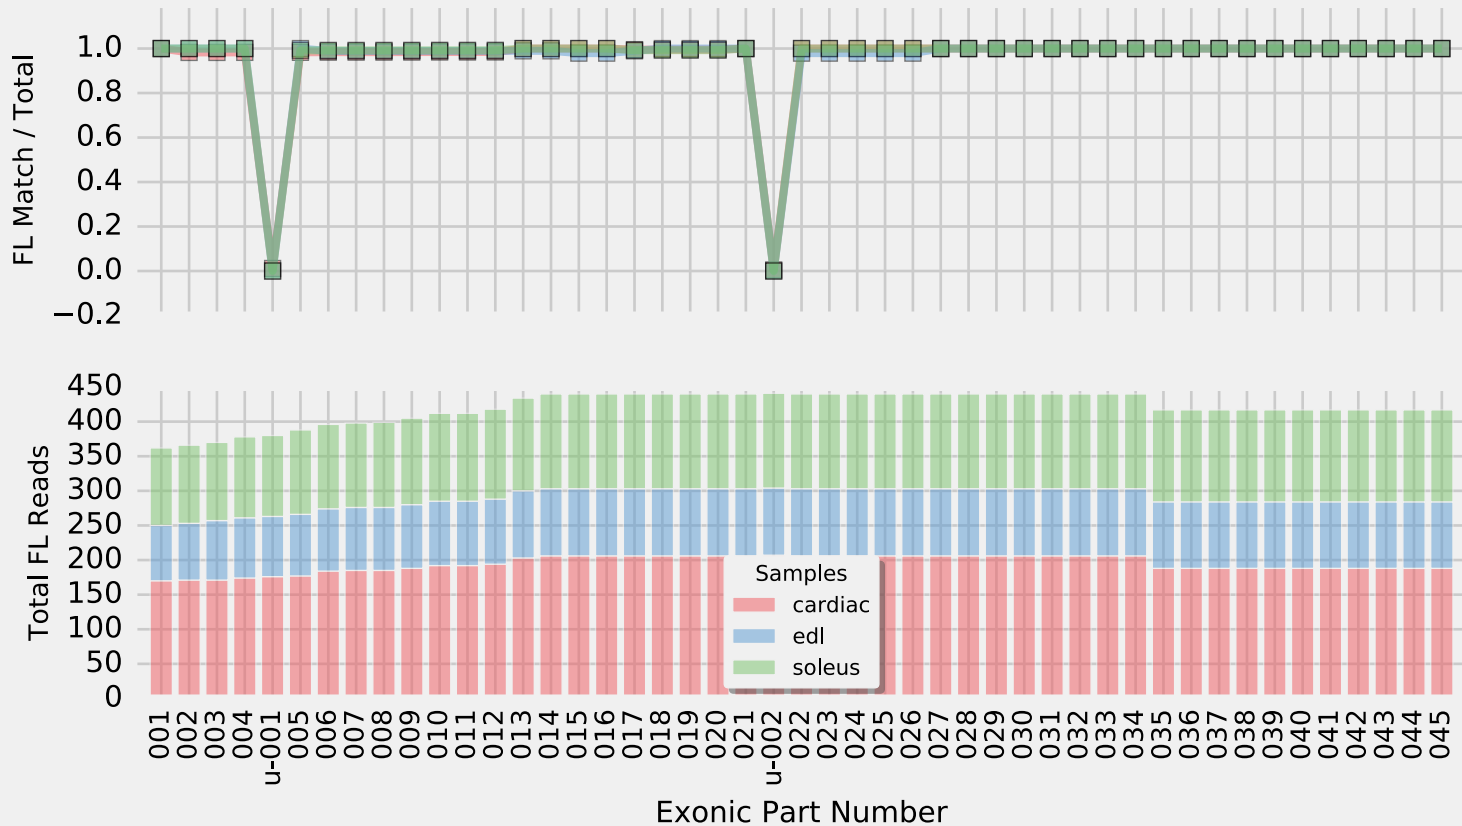

# Vwf

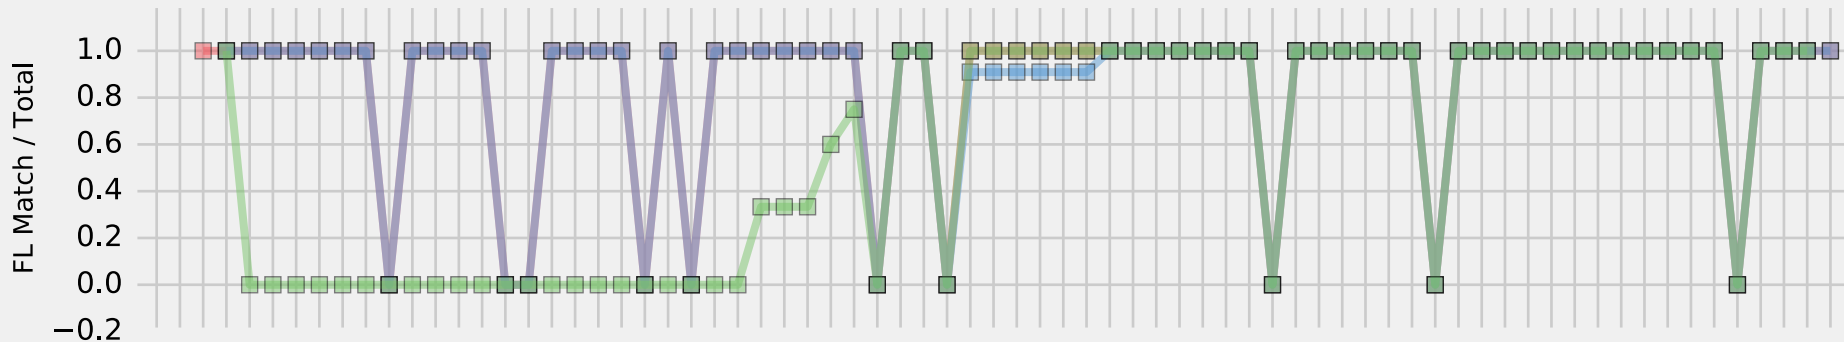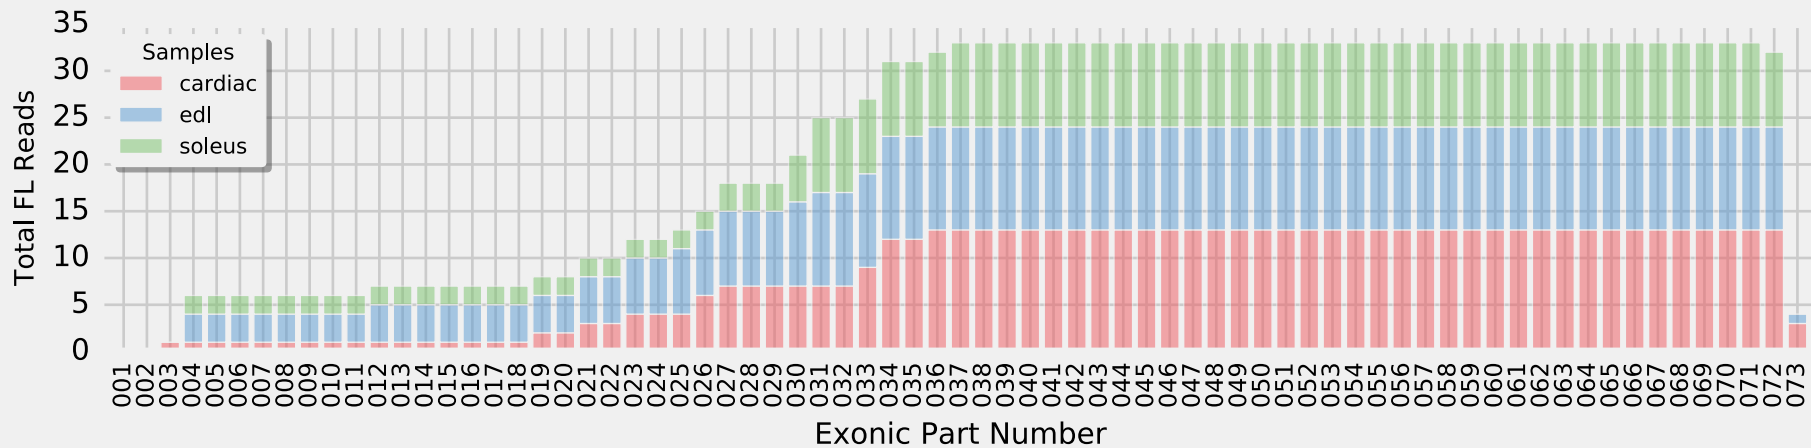



# Wdr7

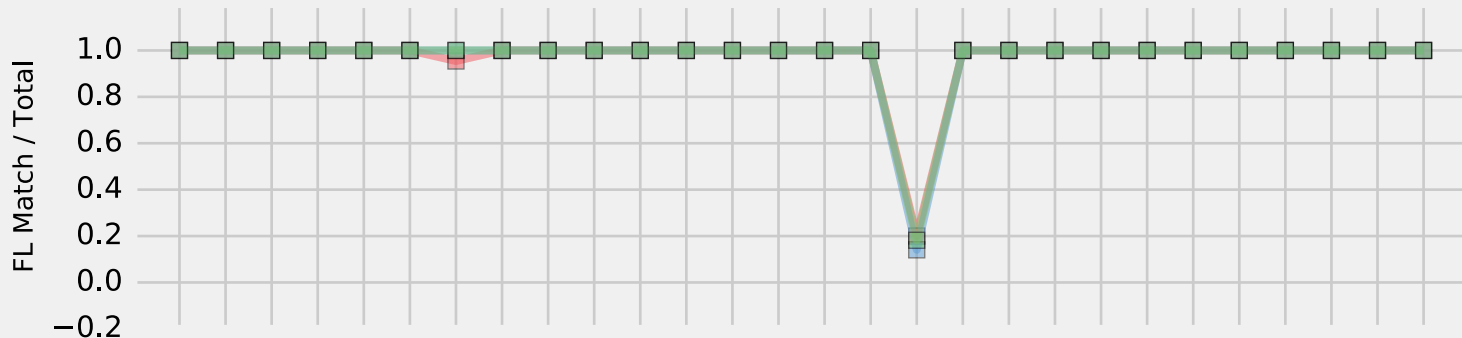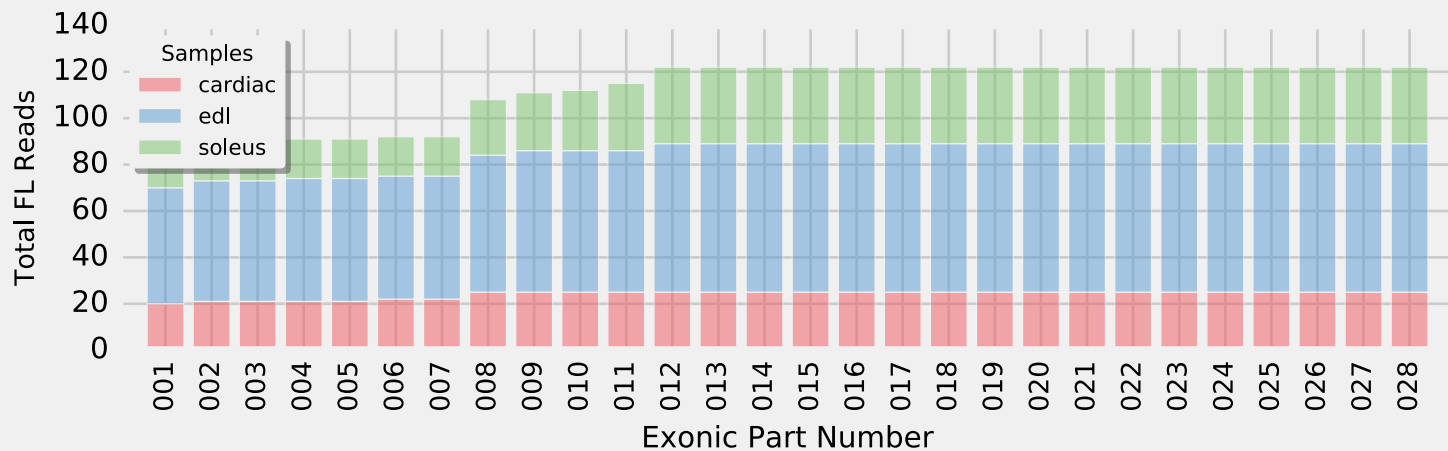

# Wwp1

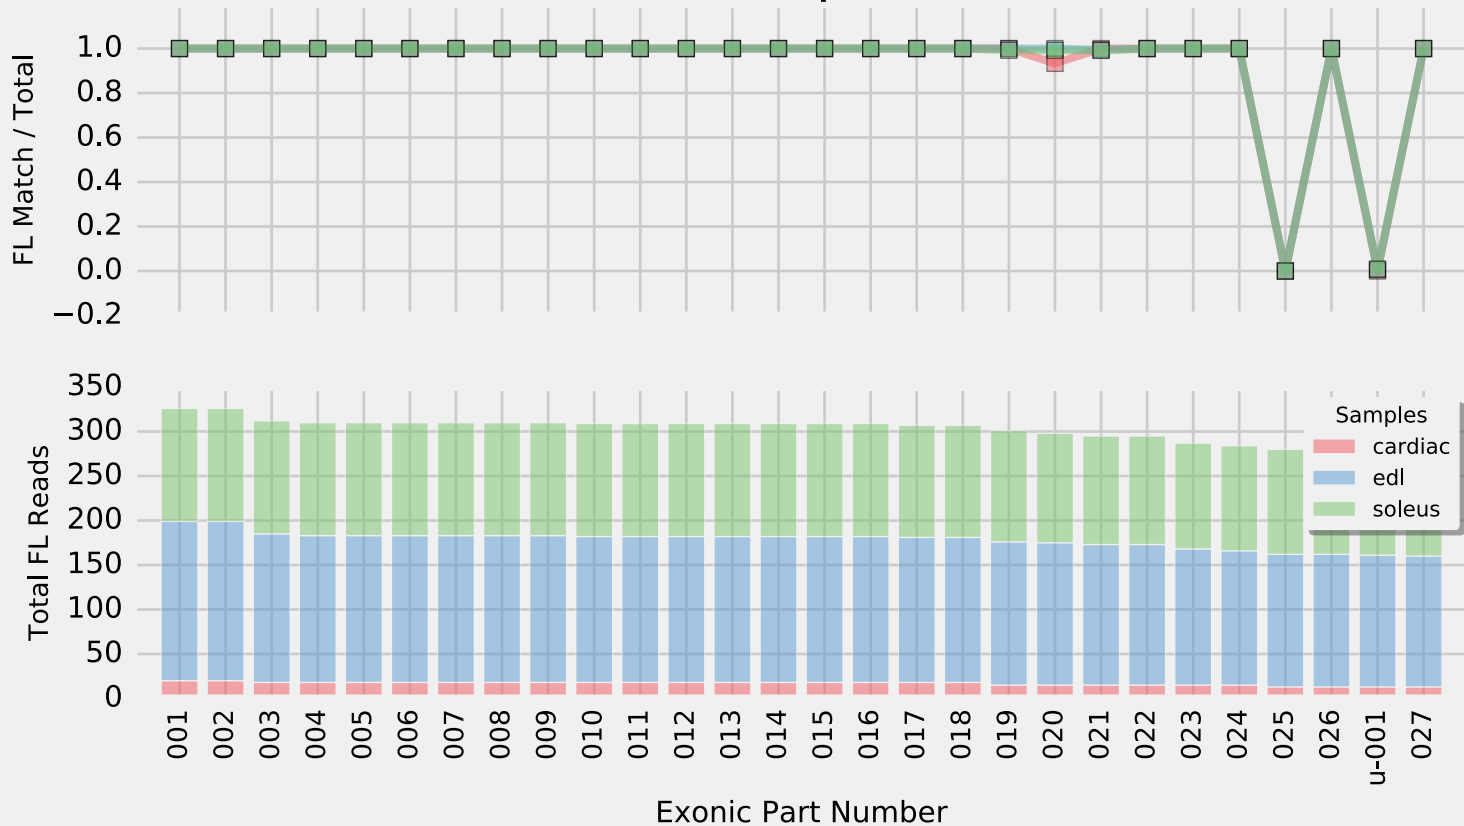

Xdh

FL Match / Total

1.0  
0.8  
0.6  
0.4  
0.2  
0.0  
-0.2

Total FL Reads

Samples  
cardiac  
edl  
soleus

001 002 u-001 003 004 005 006 007 008 009 010 011 012 013 014 015 016 017 018 019 020 u-002 021 022 023 024 025 026 027 028 029 030 031 032 033 034 035 036

Exonic Part Number

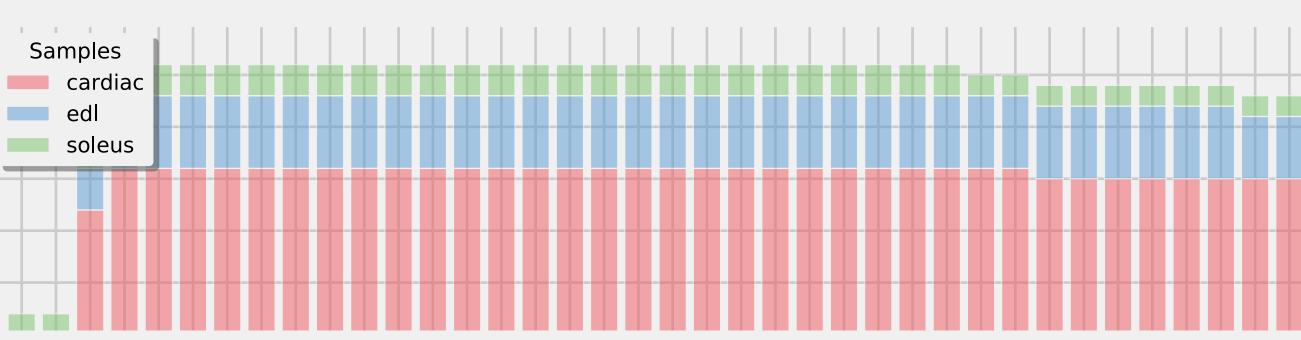

# Xirp1

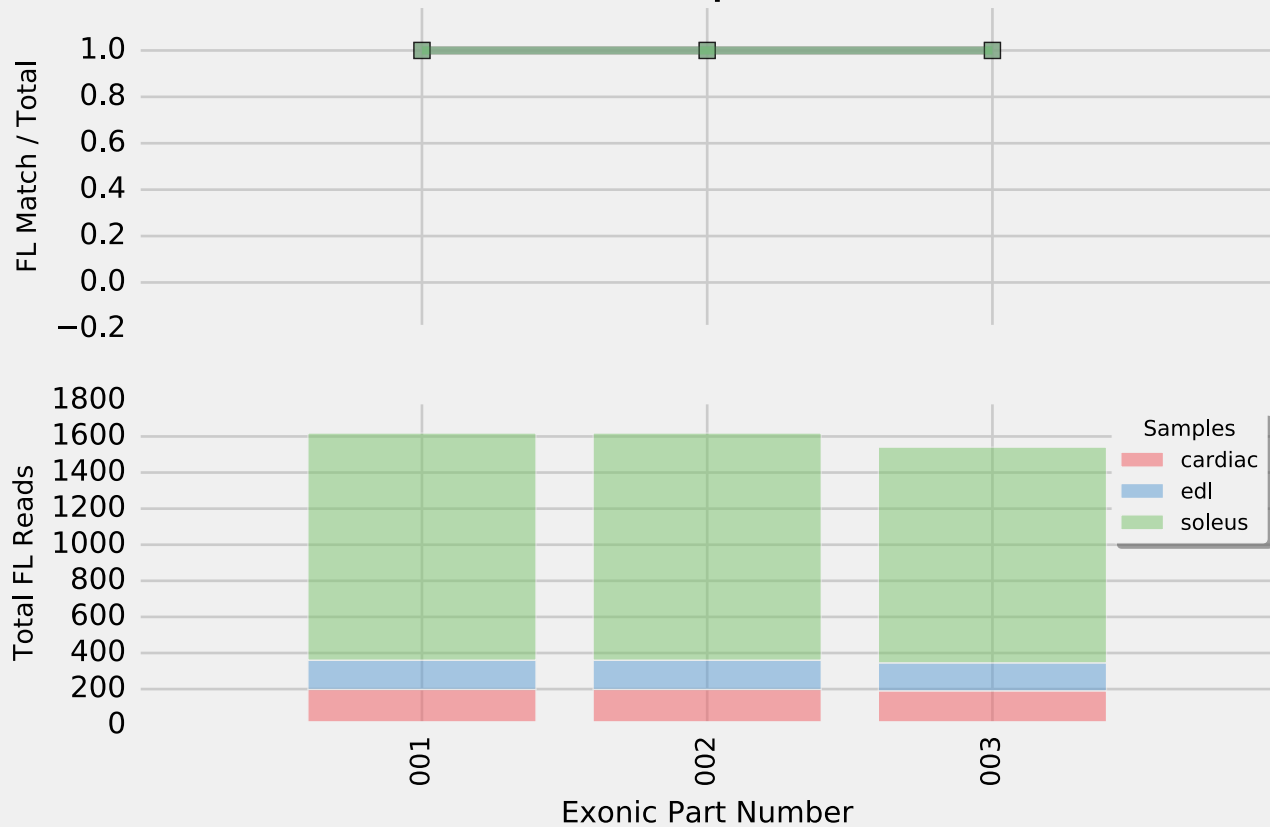

# Xirp2

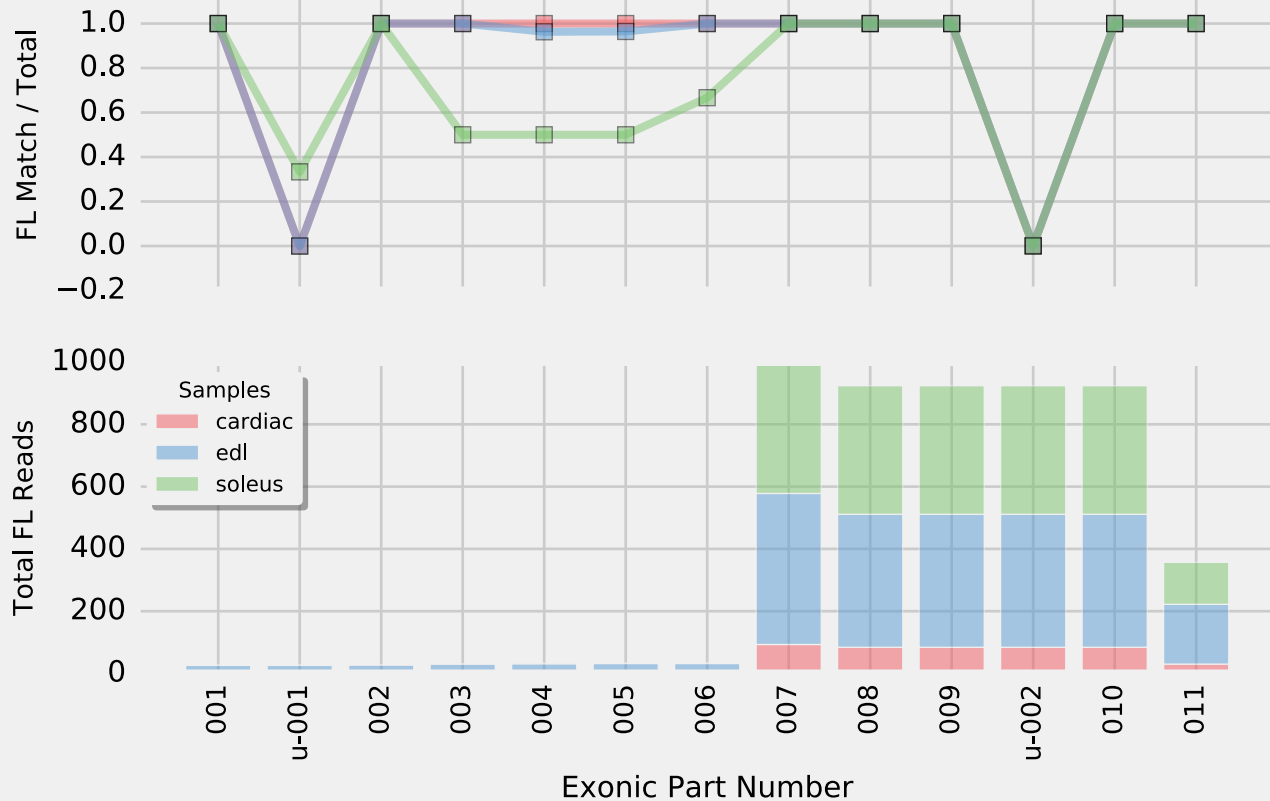

# Xpo4

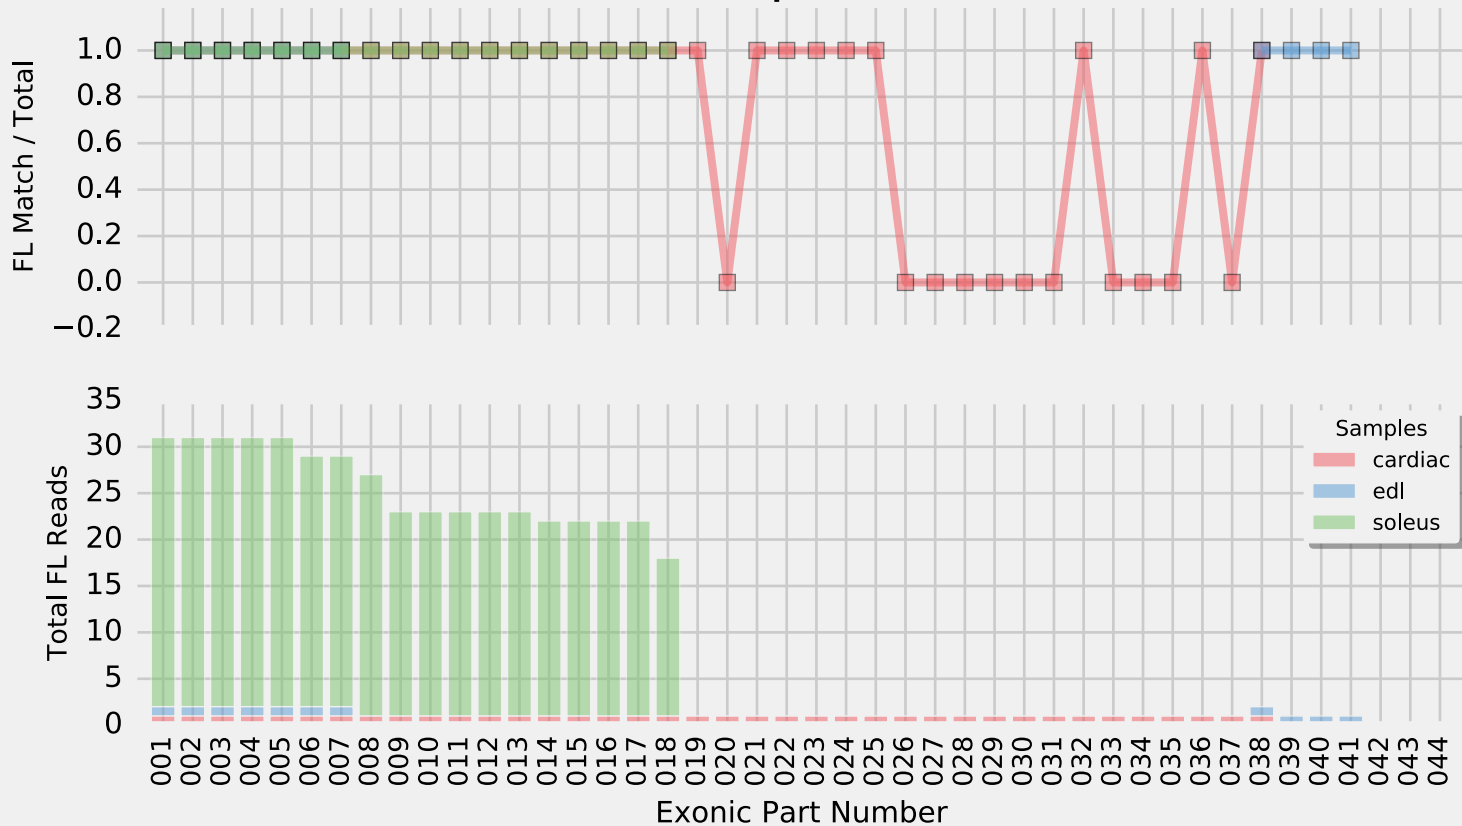

# Xpot

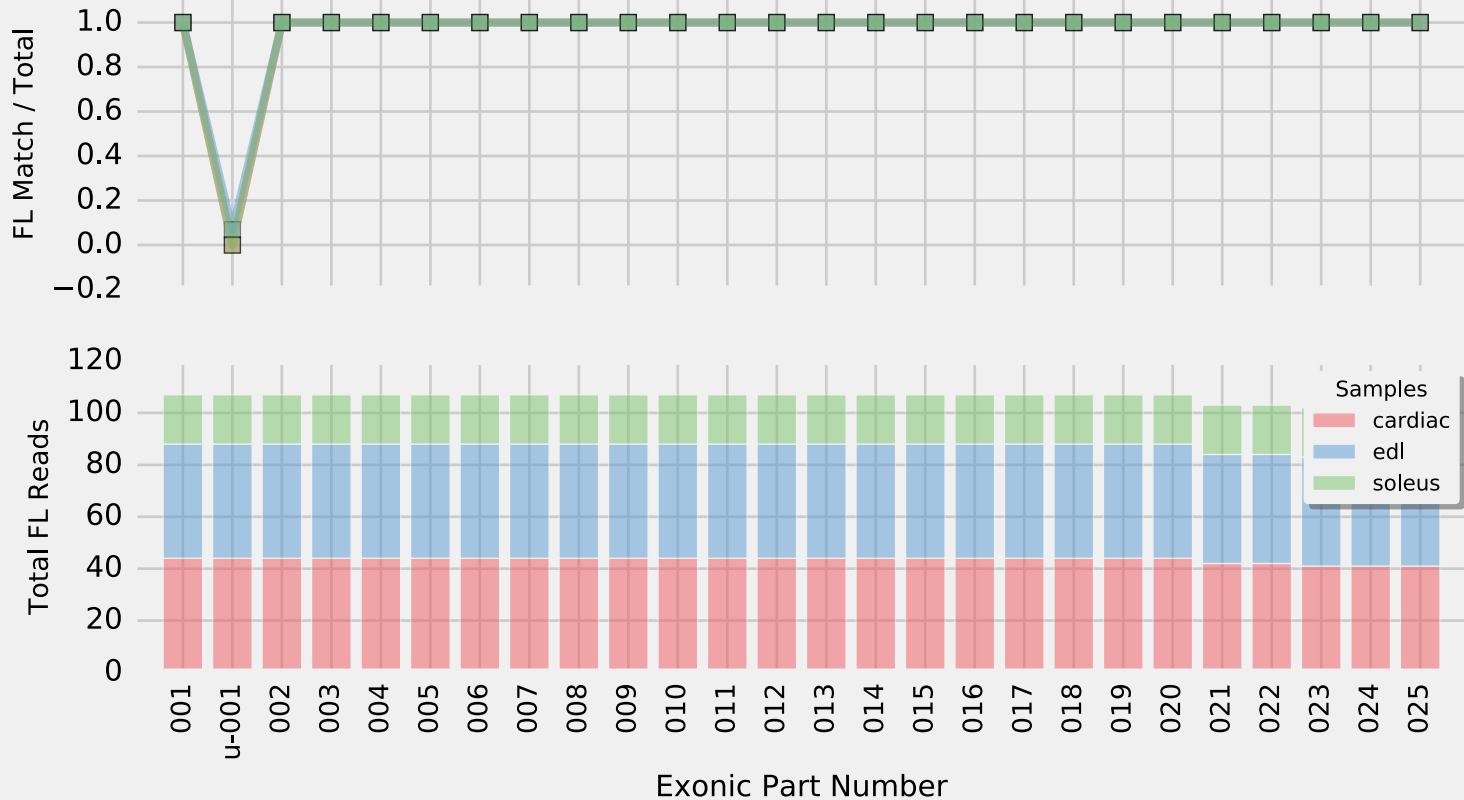

# Xpr1

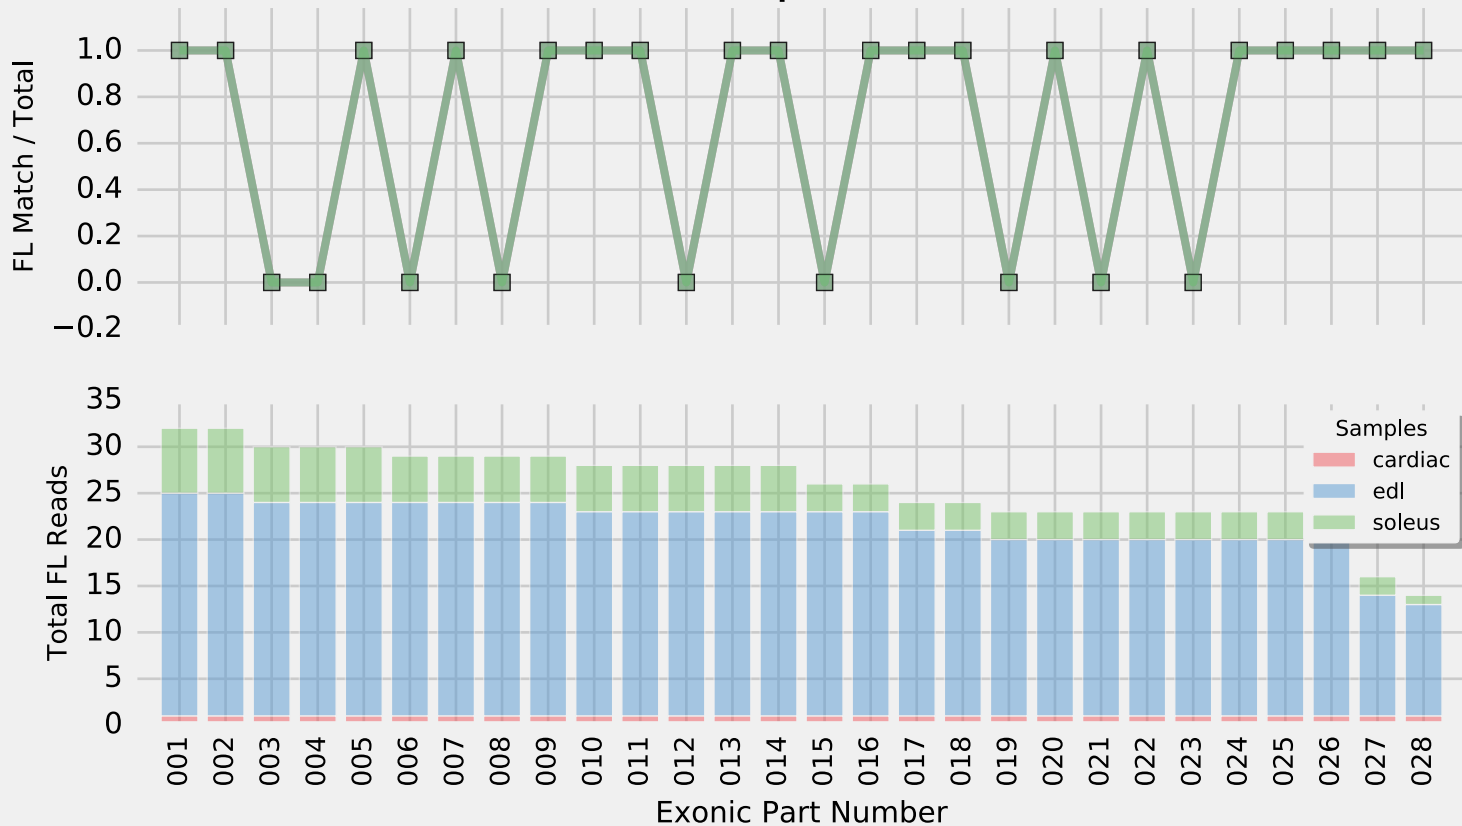



# Xrn1

FL Match / Total

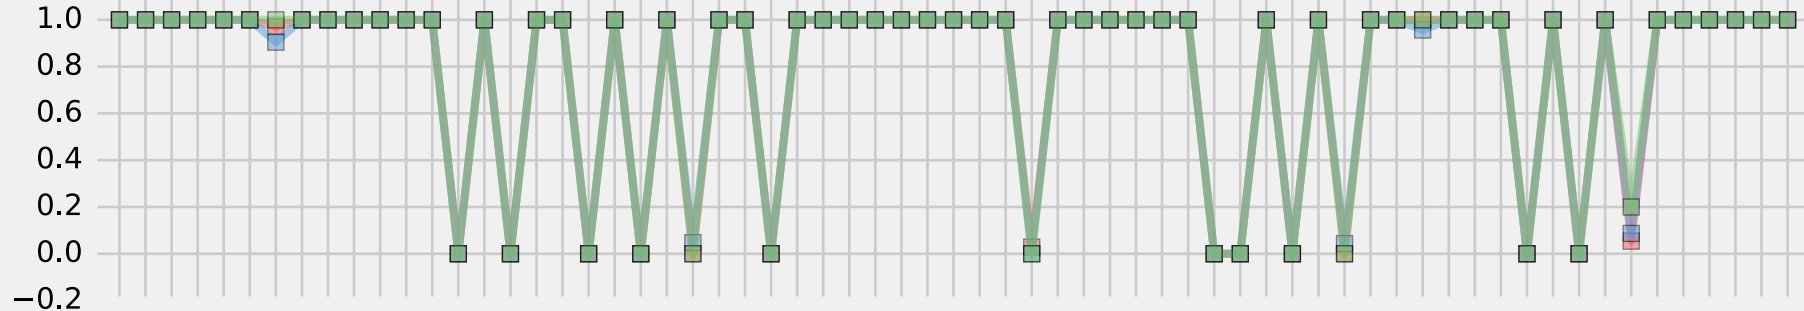

Total FL Reads

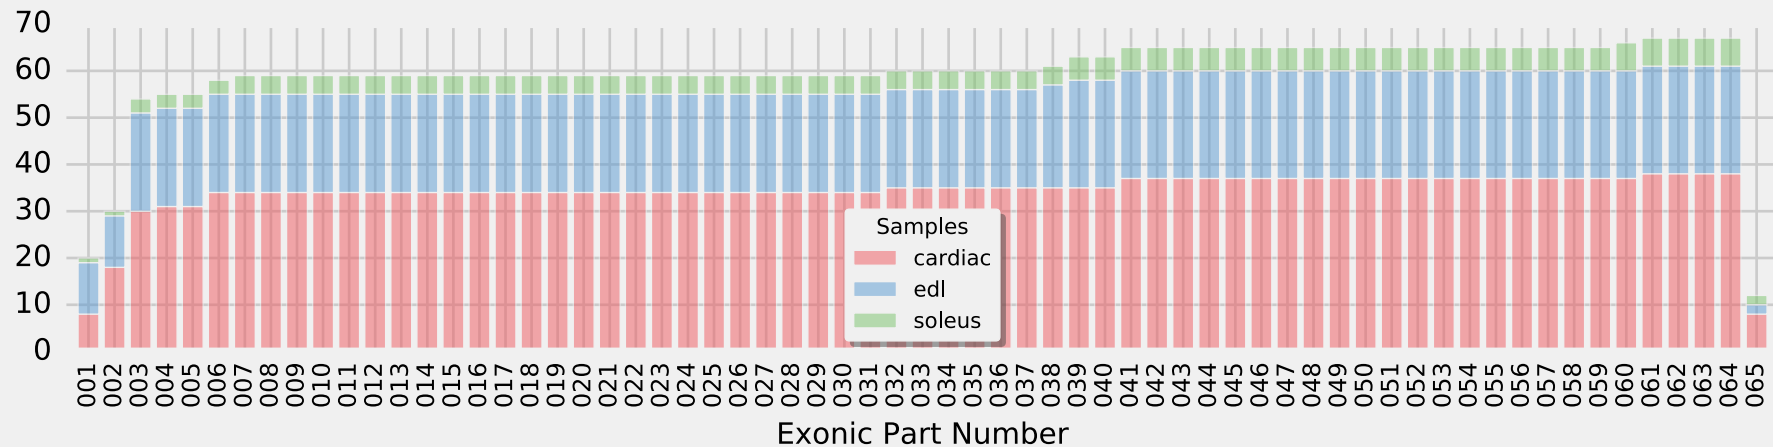

# Ythdf3

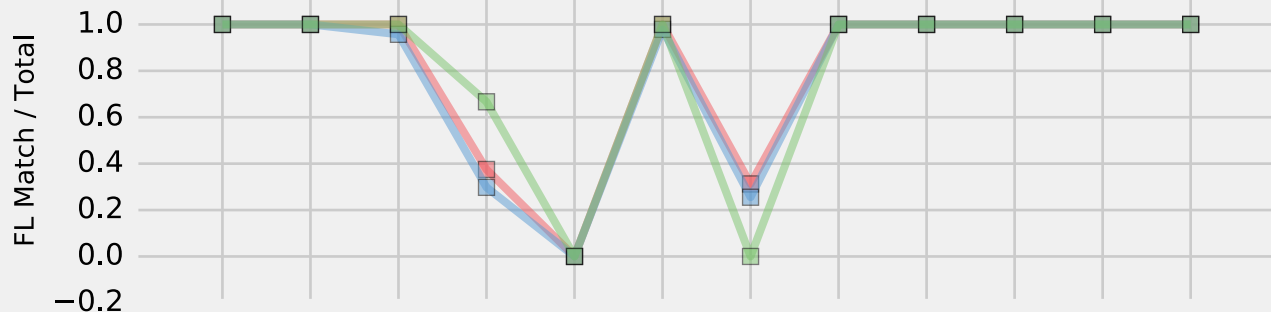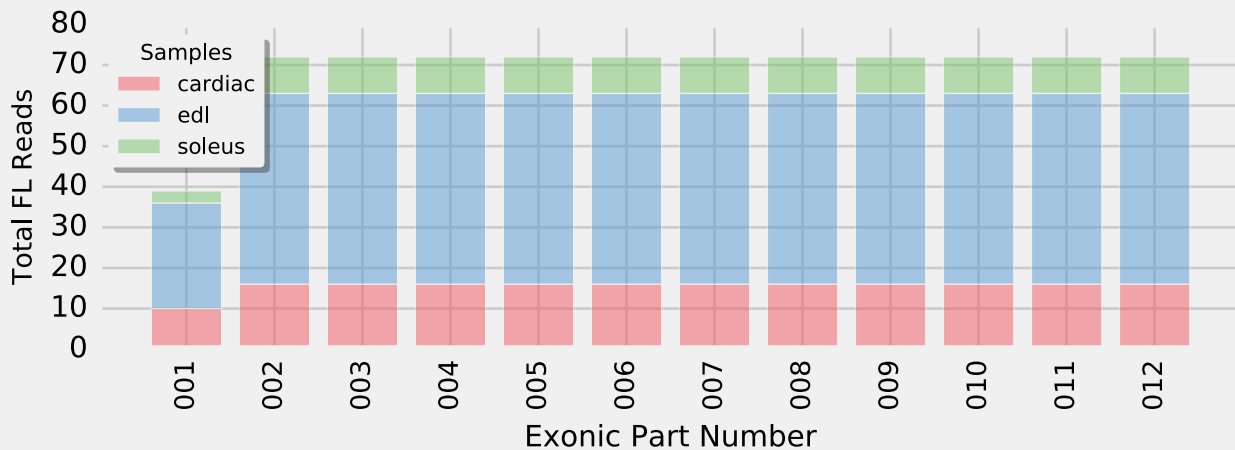

# Zak

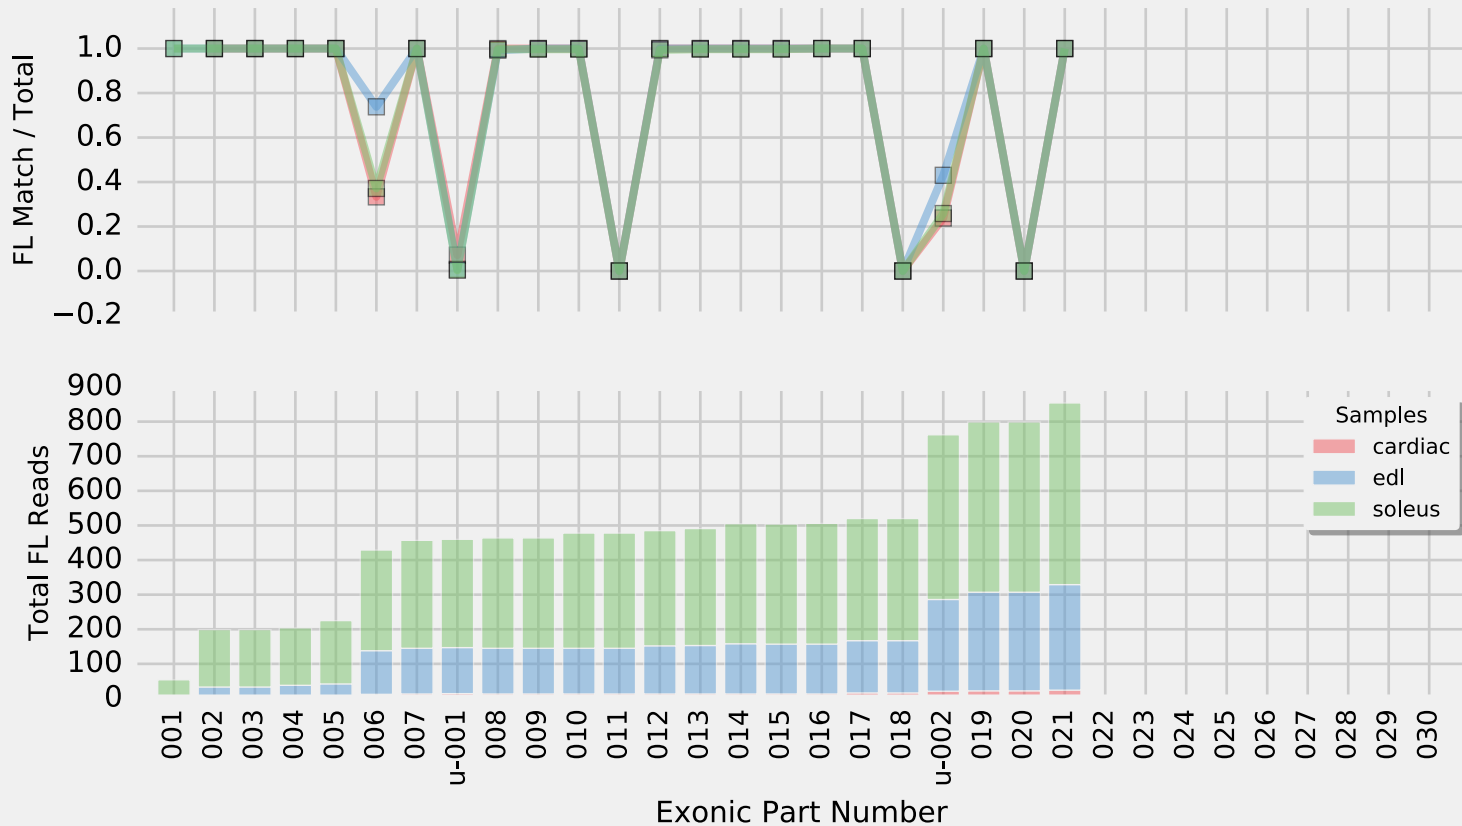

# Zbtb16

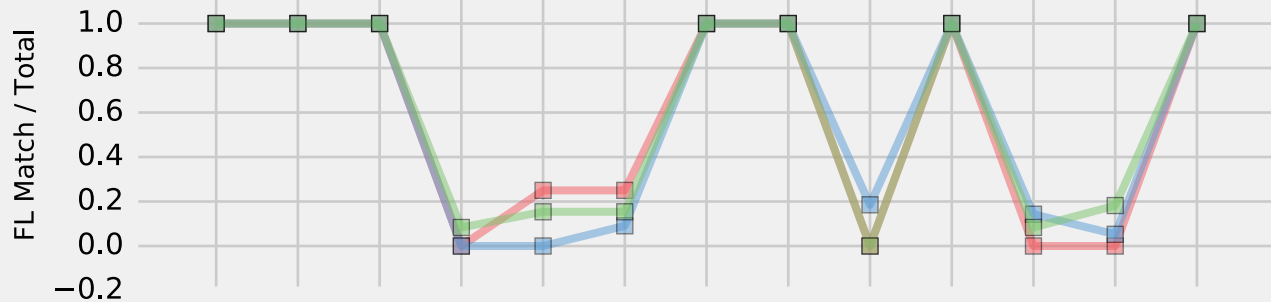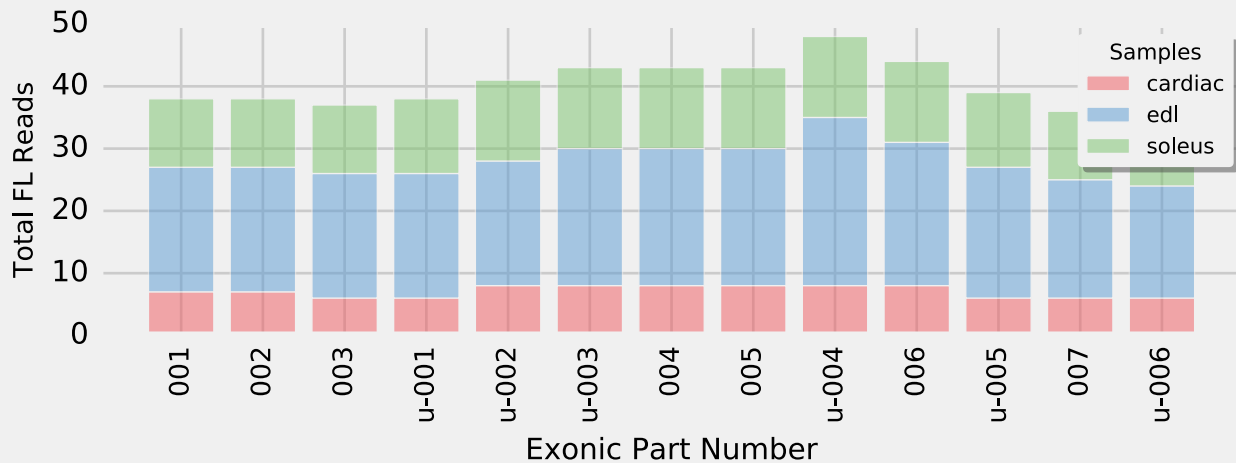

# Zbtb20

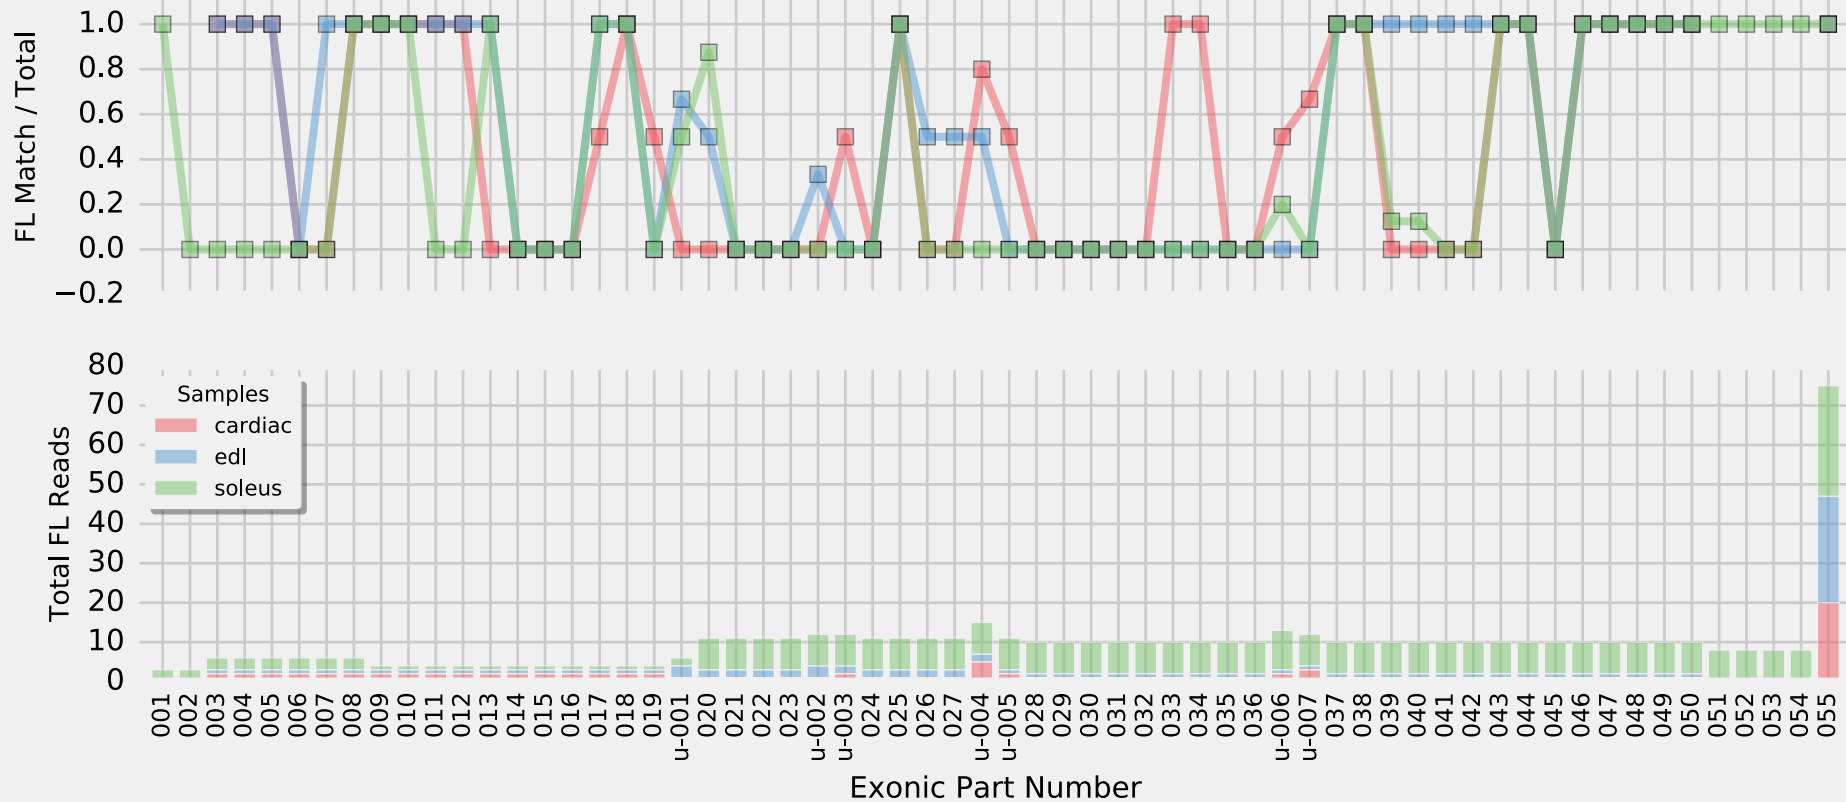

# Zbtb41

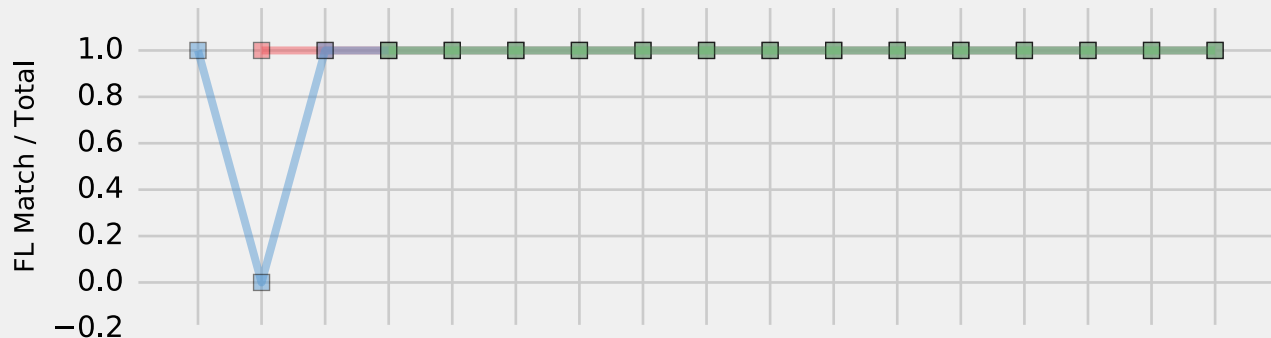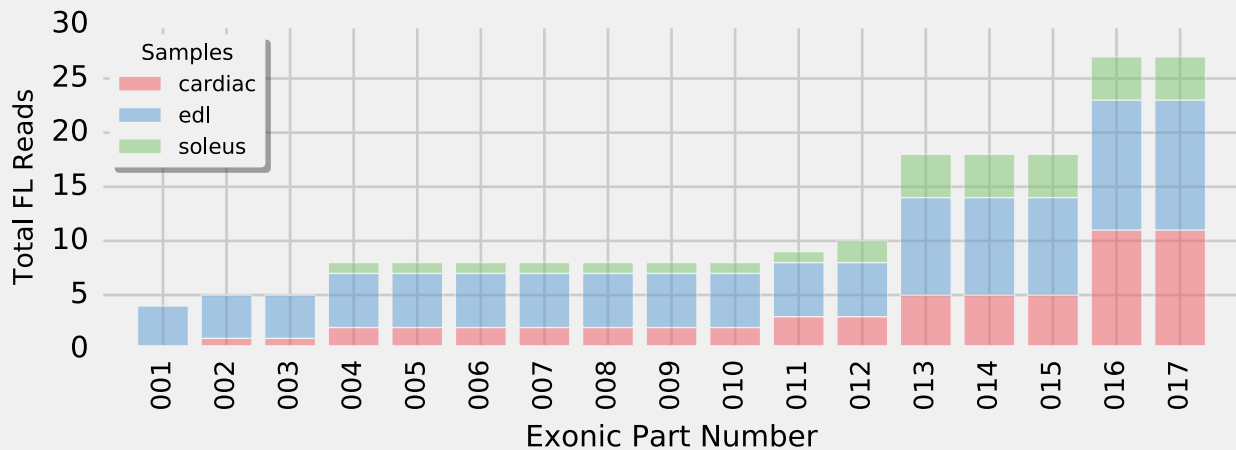

# Zc3h7b

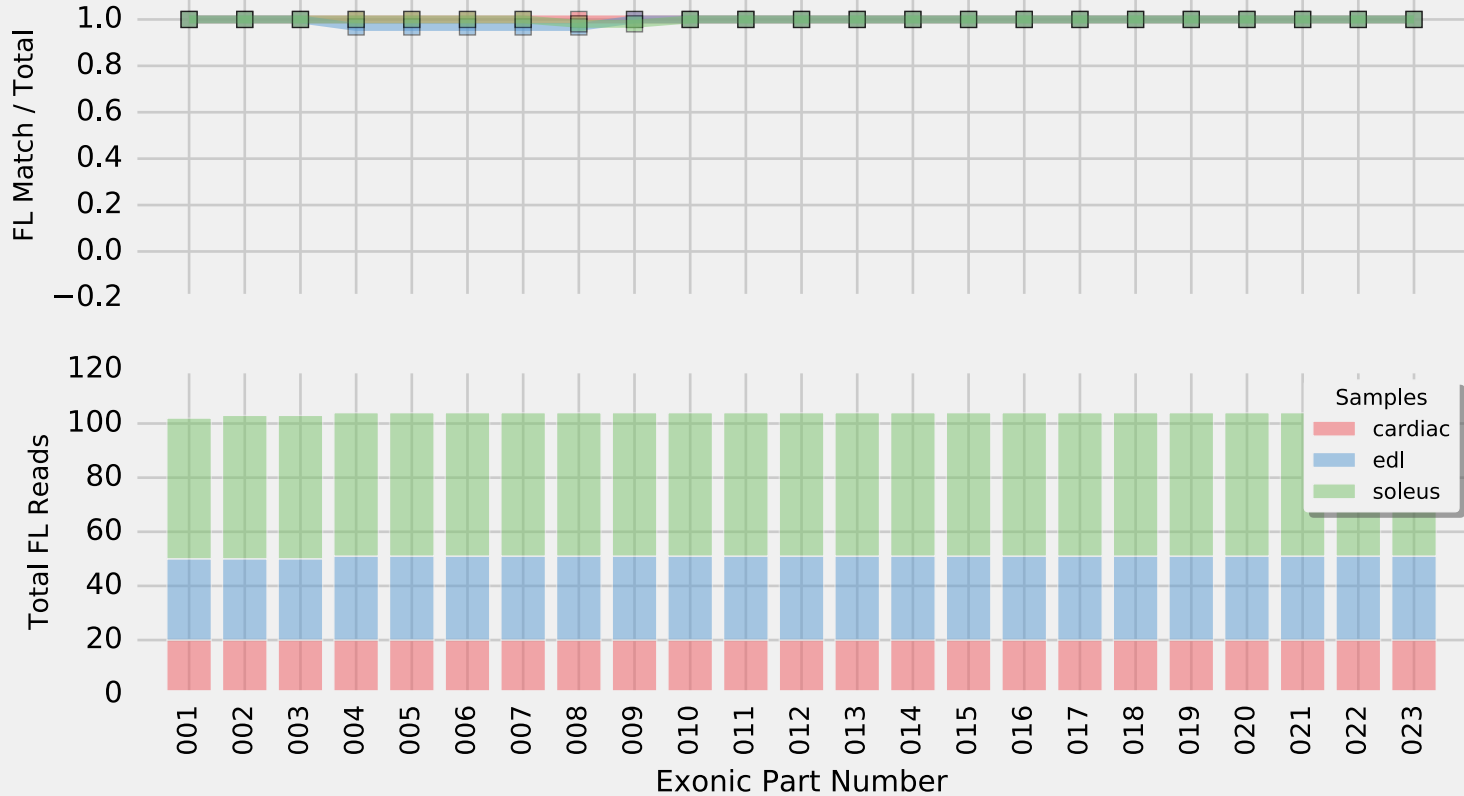

# Zcchc6

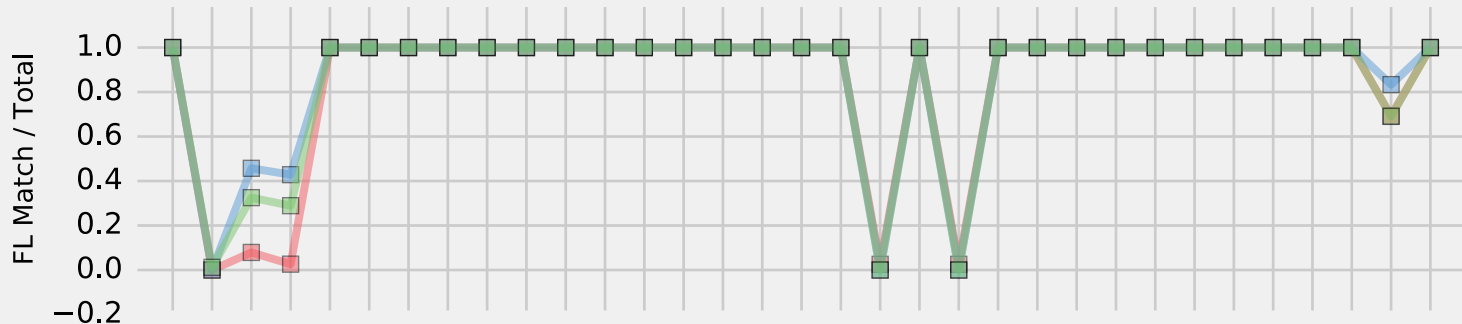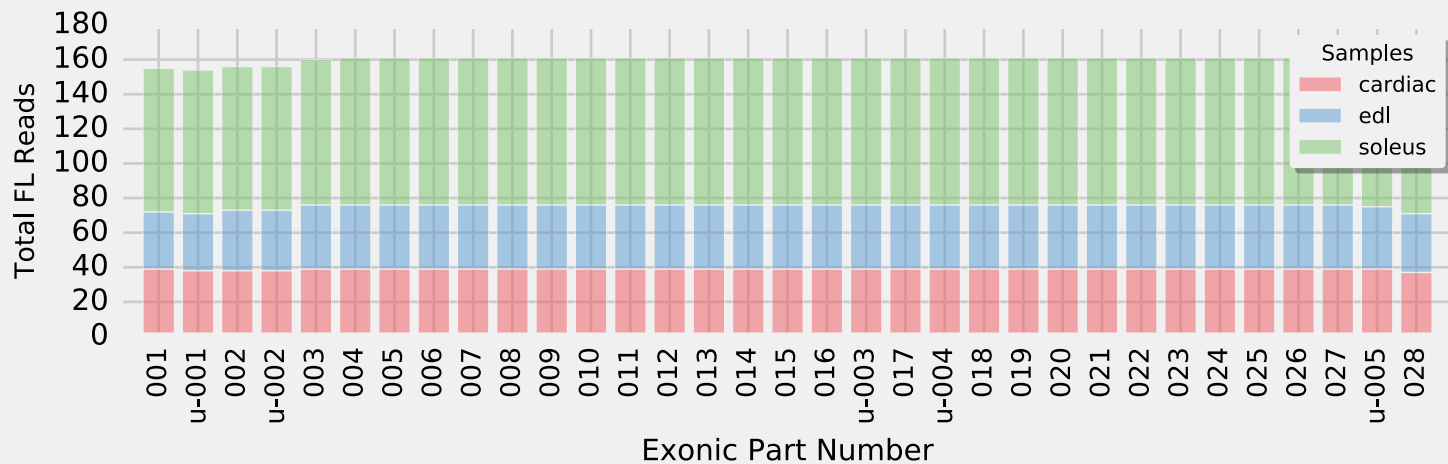



# Zdhhc3

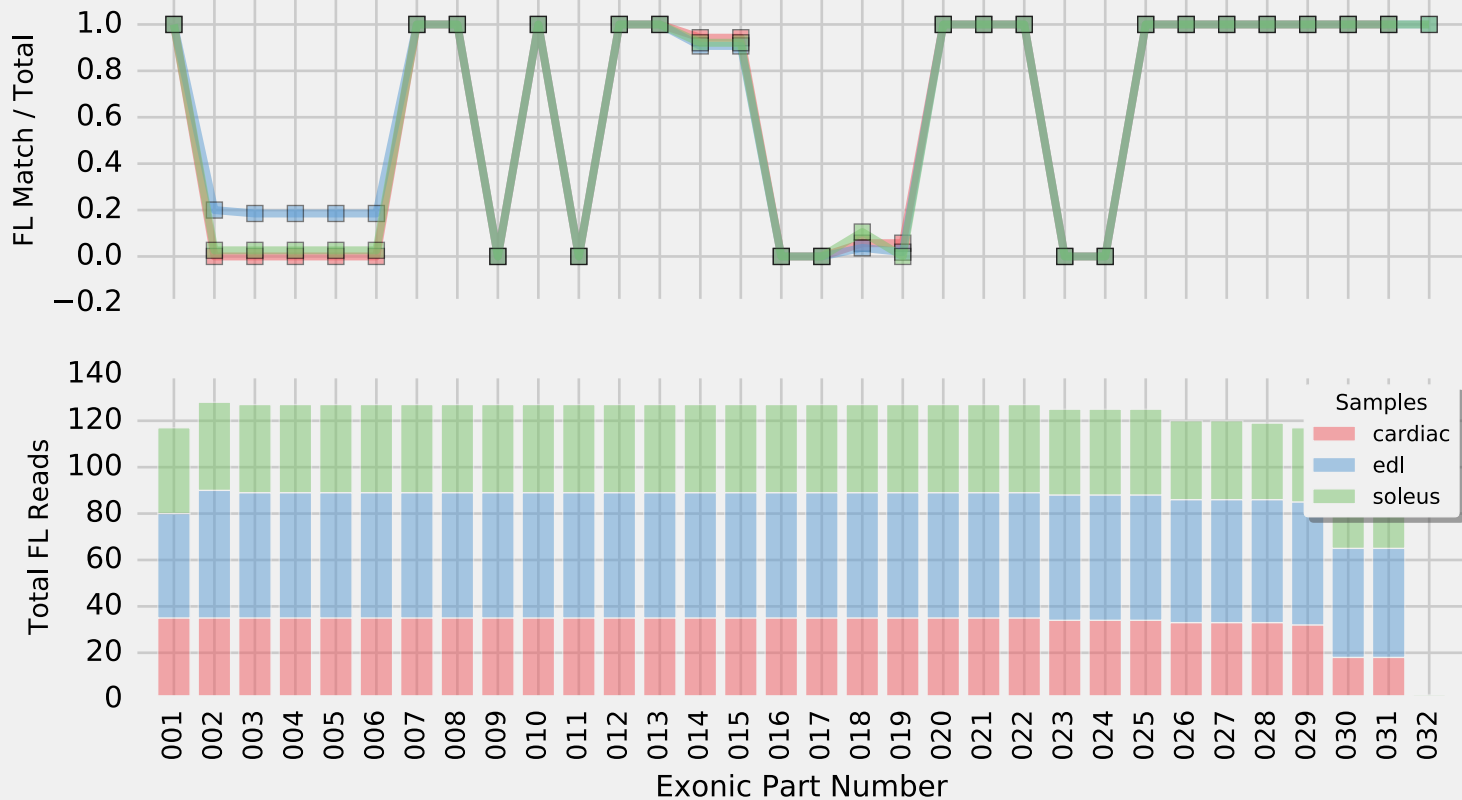

# Zeb1

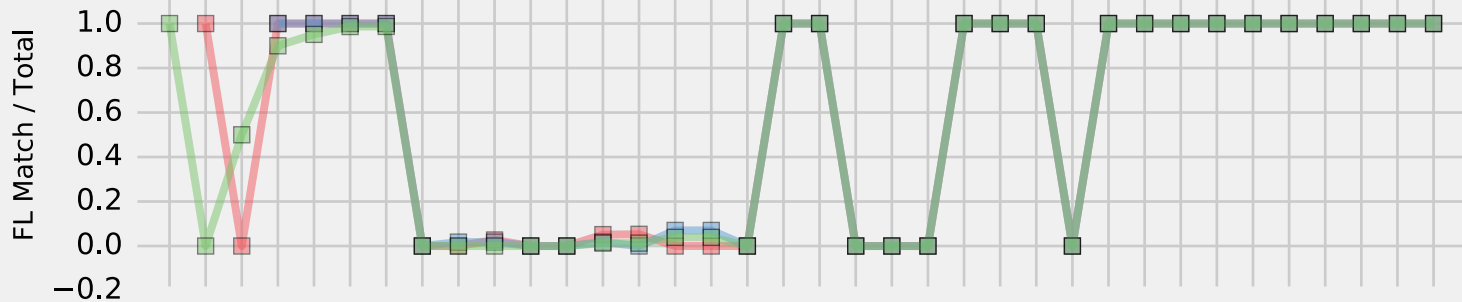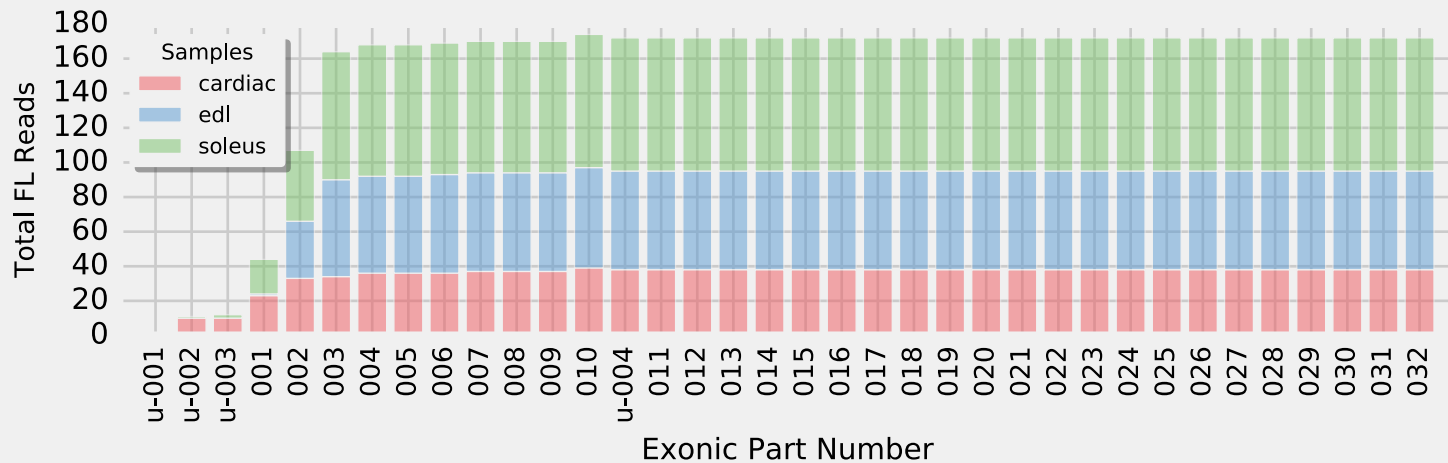

# Zfp106

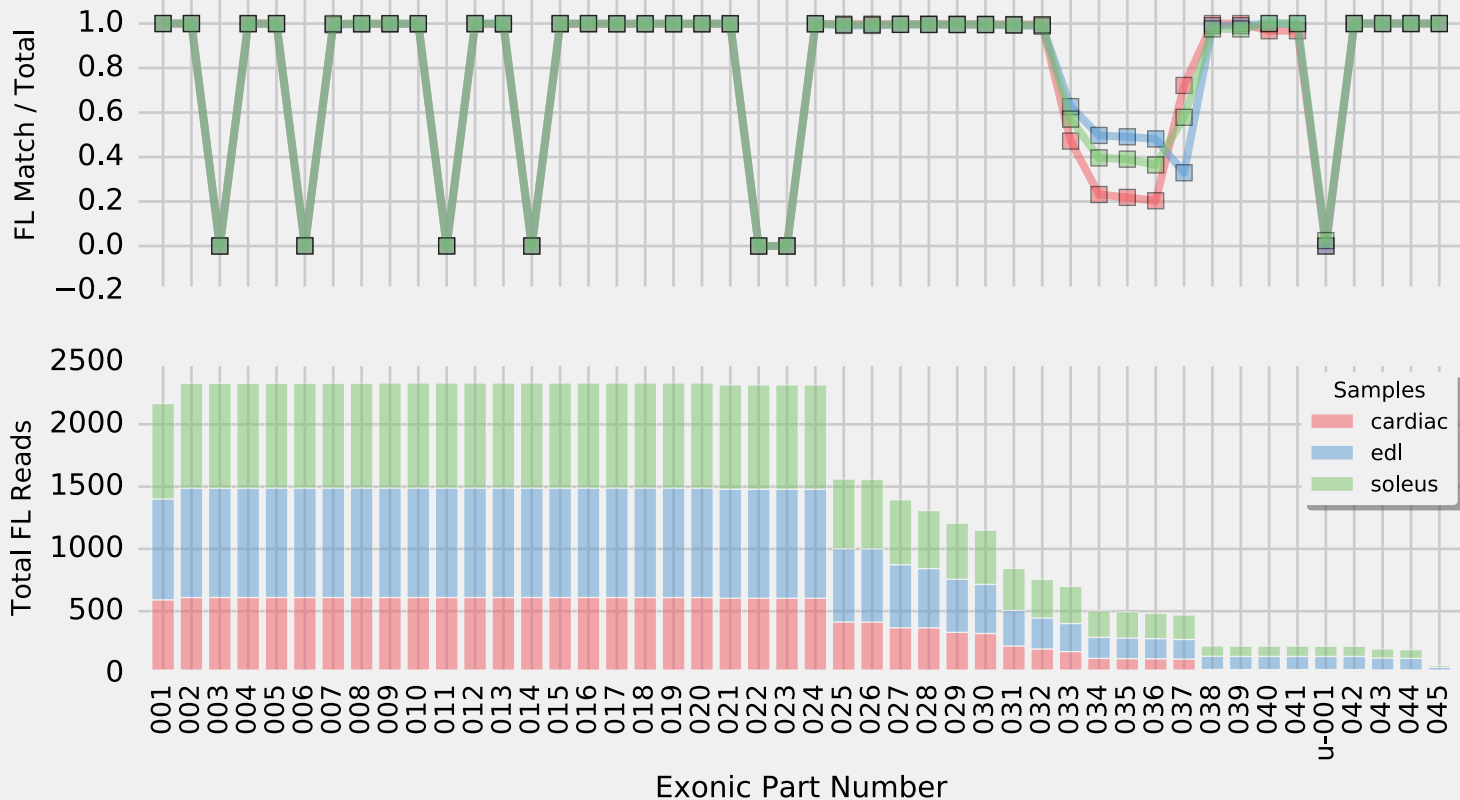

# Zfp148

FL Match / Total

1.0  
0.8  
0.6  
0.4  
0.2  
0.0  
-0.2

Total FL Reads

25  
20  
15  
10  
5  
0

Samples  
cardiac  
edl  
soleus

Exonic Part Number

001 002 003 004 005 006 007 008 009 010 011

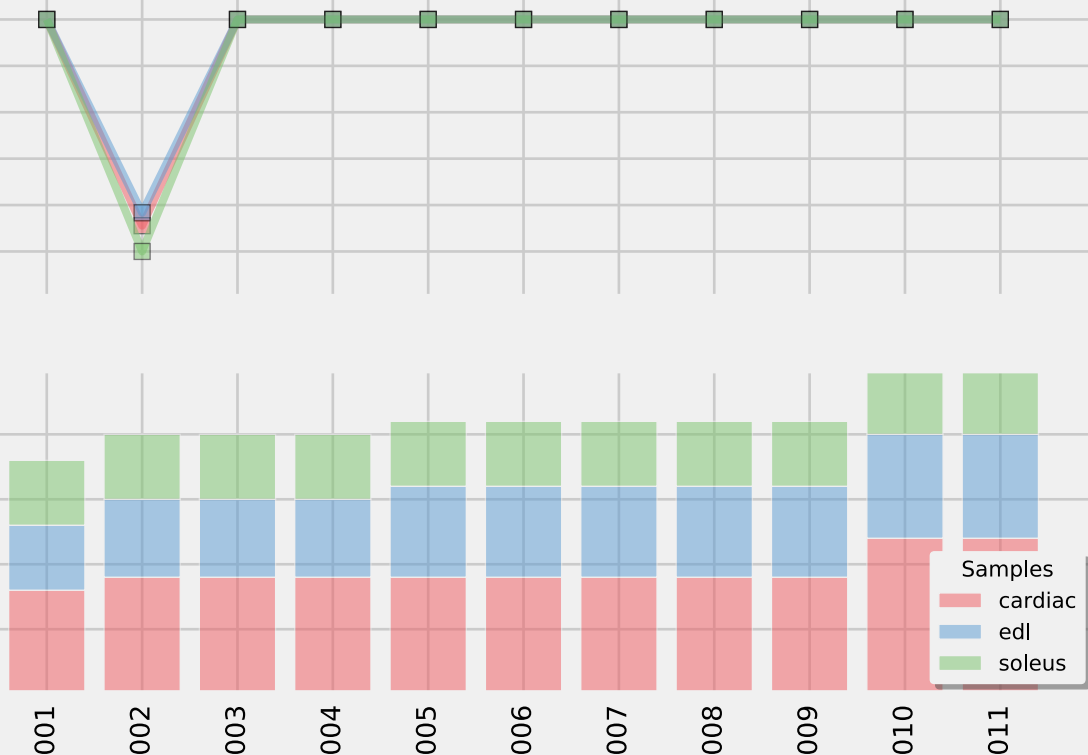

# Zfp24

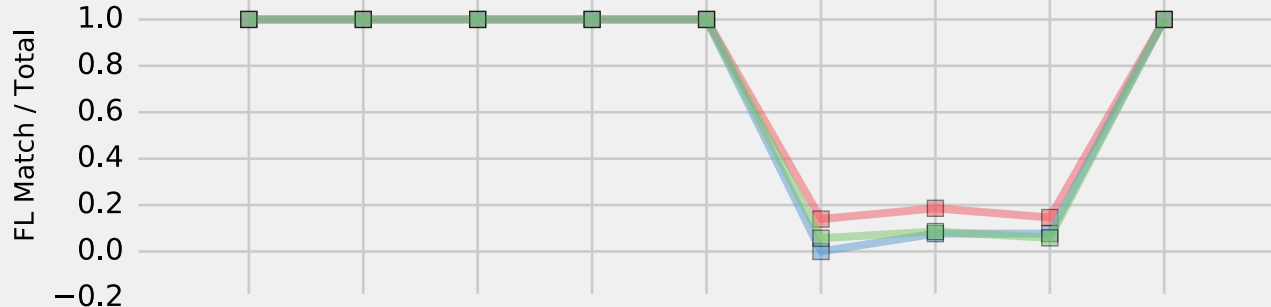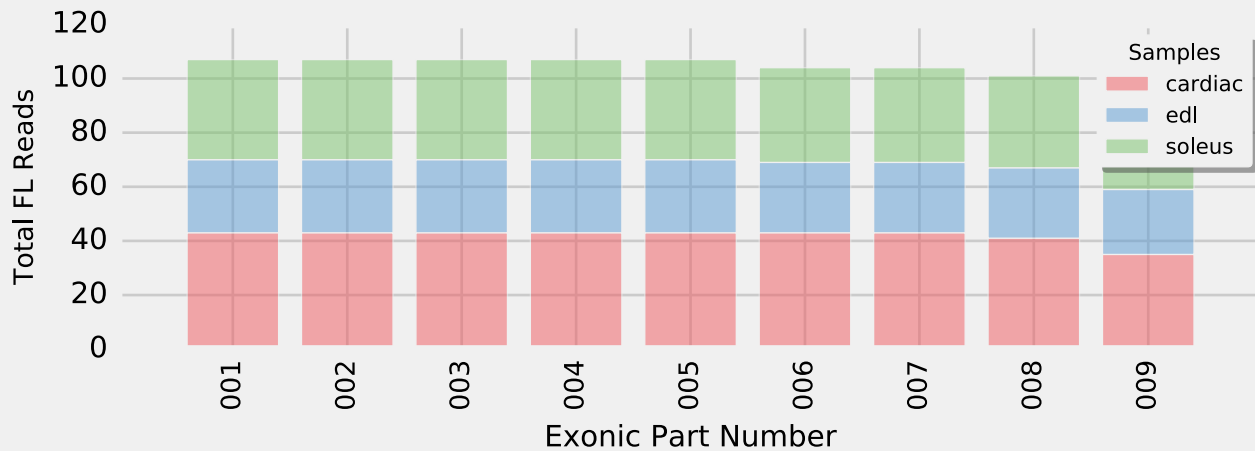

# Zfp26

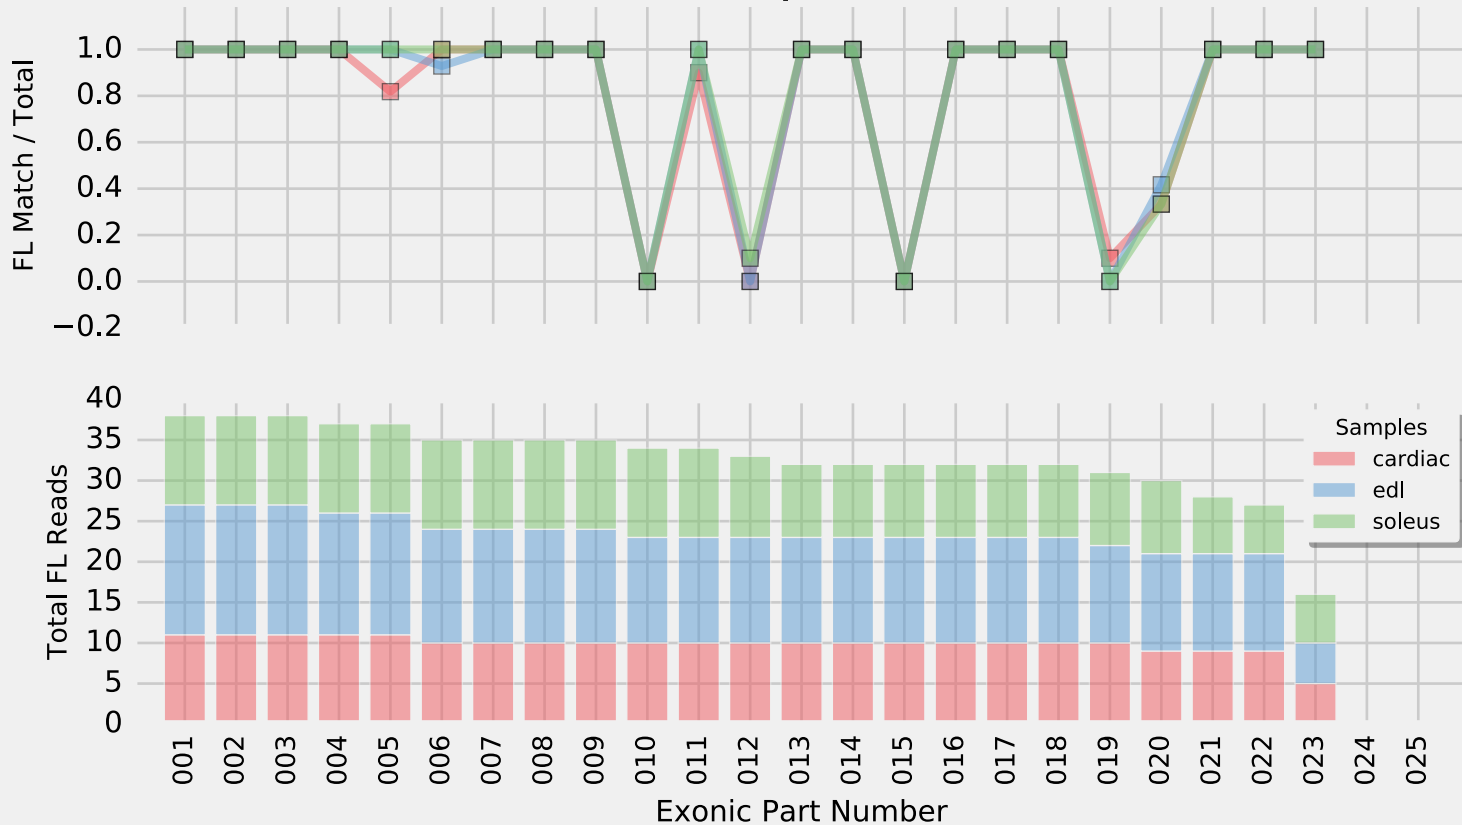

# Zfp266

FL Match / Total

1.0  
0.8  
0.6  
0.4  
0.2  
0.0  
-0.2

Total FL Reads

50  
40  
30  
20  
10  
0

Samples

cardiac  
edl  
soleus

Exonic Part Number

001

002

003

004

005

006

007

008

009

010

011

012

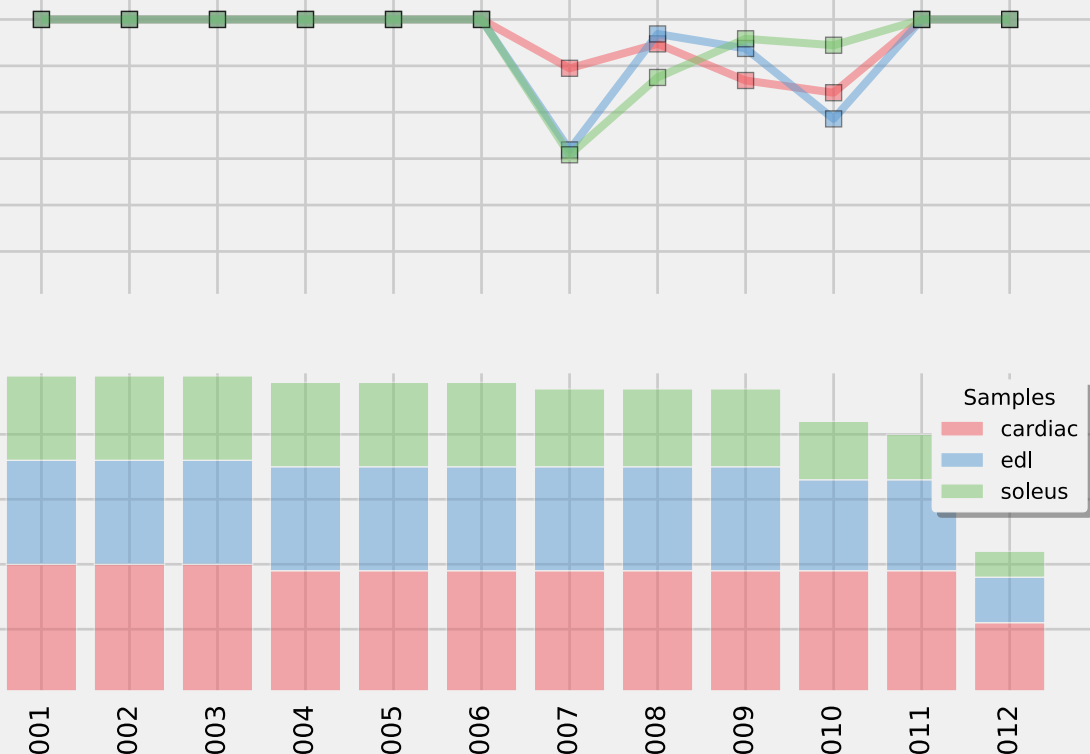

# Zfp292

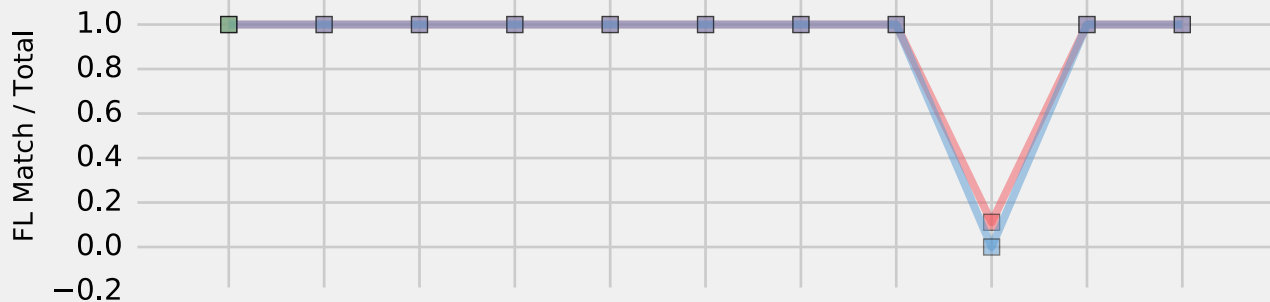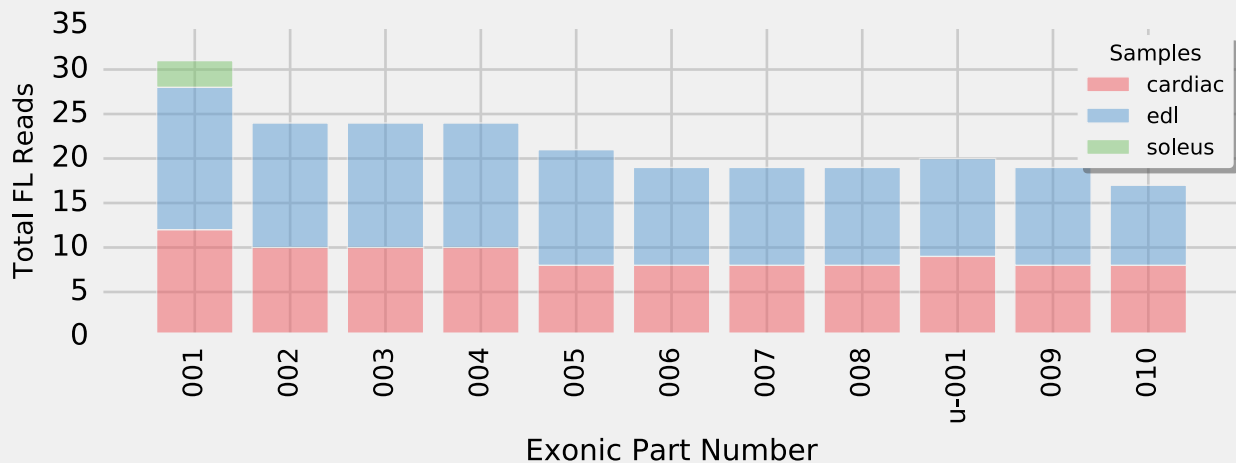



# Zfp397

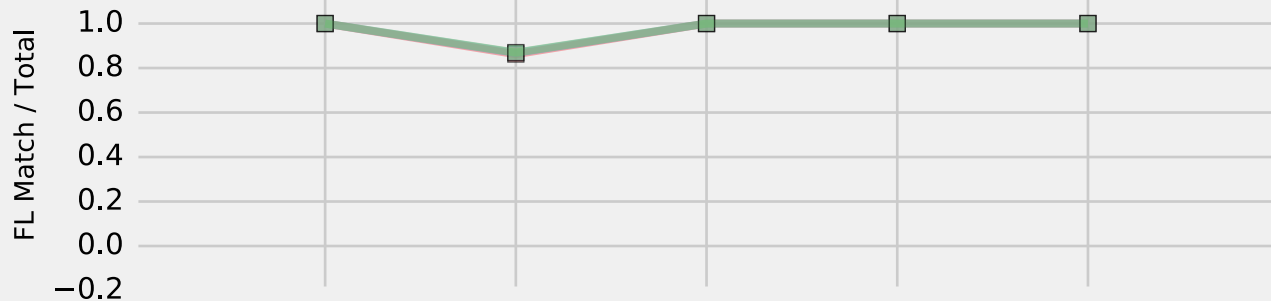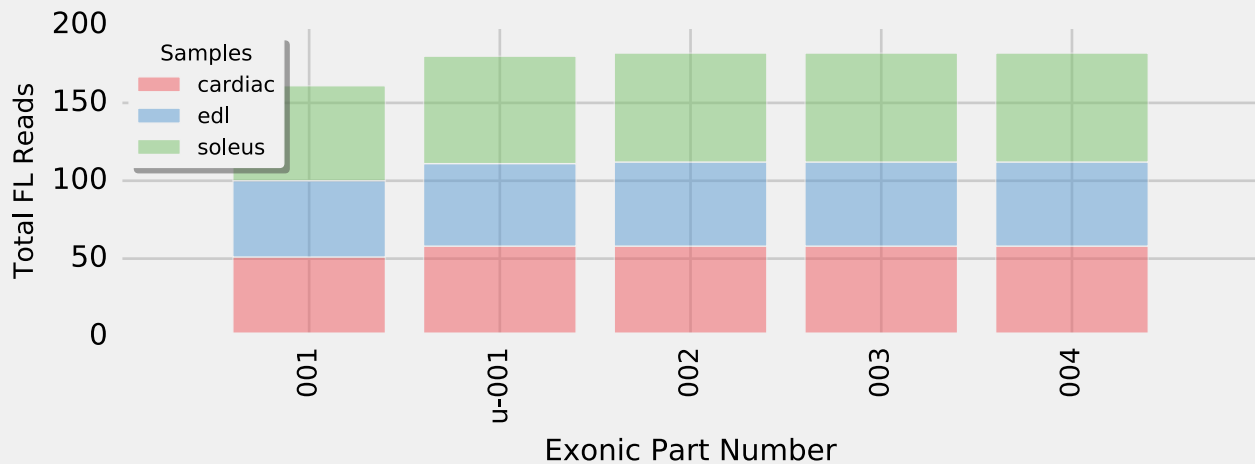

# Zfp445

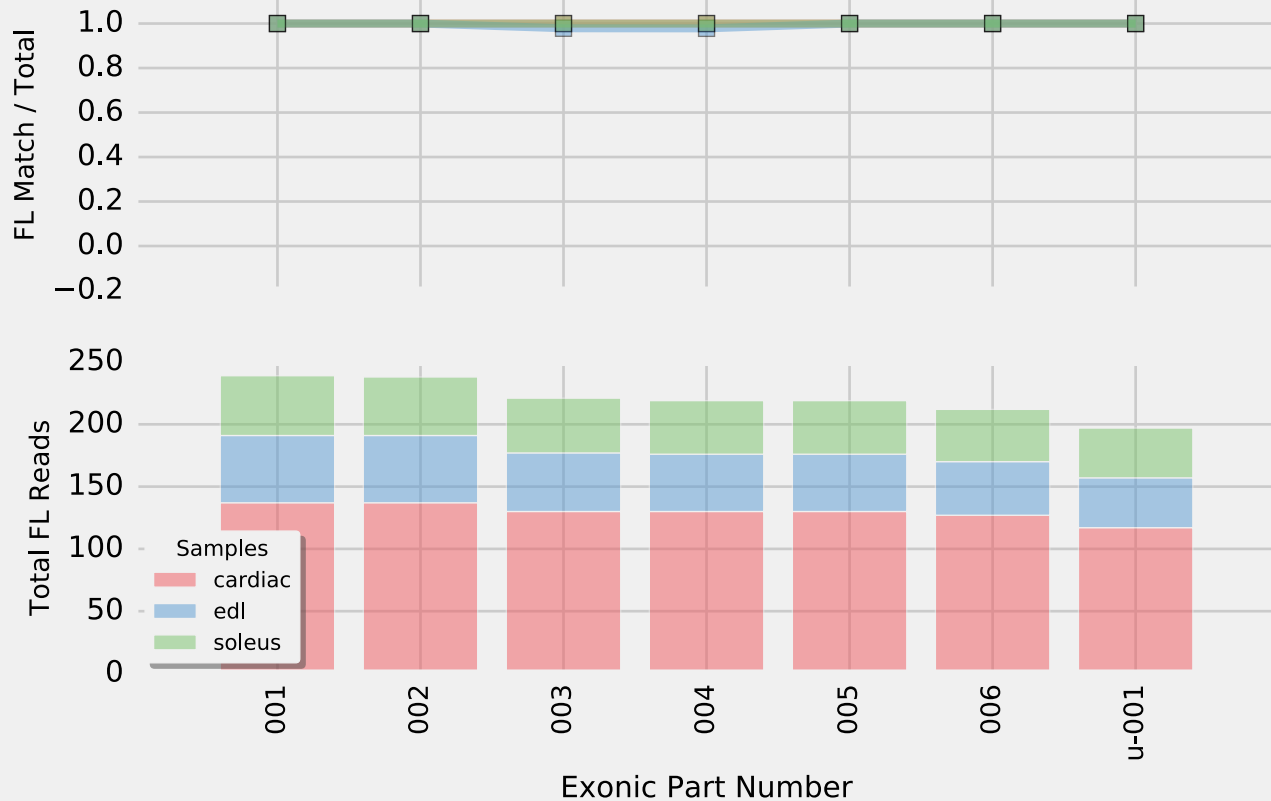

# Zfp507

FL Match / Total

1.0  
0.8  
0.6  
0.4  
0.2  
0.0  
-0.2

Total FL Reads

40  
35  
30  
25  
20  
15  
10  
5  
0

Samples

cardiac  
edl  
soleus

Exonic Part Number

001 002 003 004 005 006 007 008 009 010 011 012 013 014 015 016 017 018 019 020 021

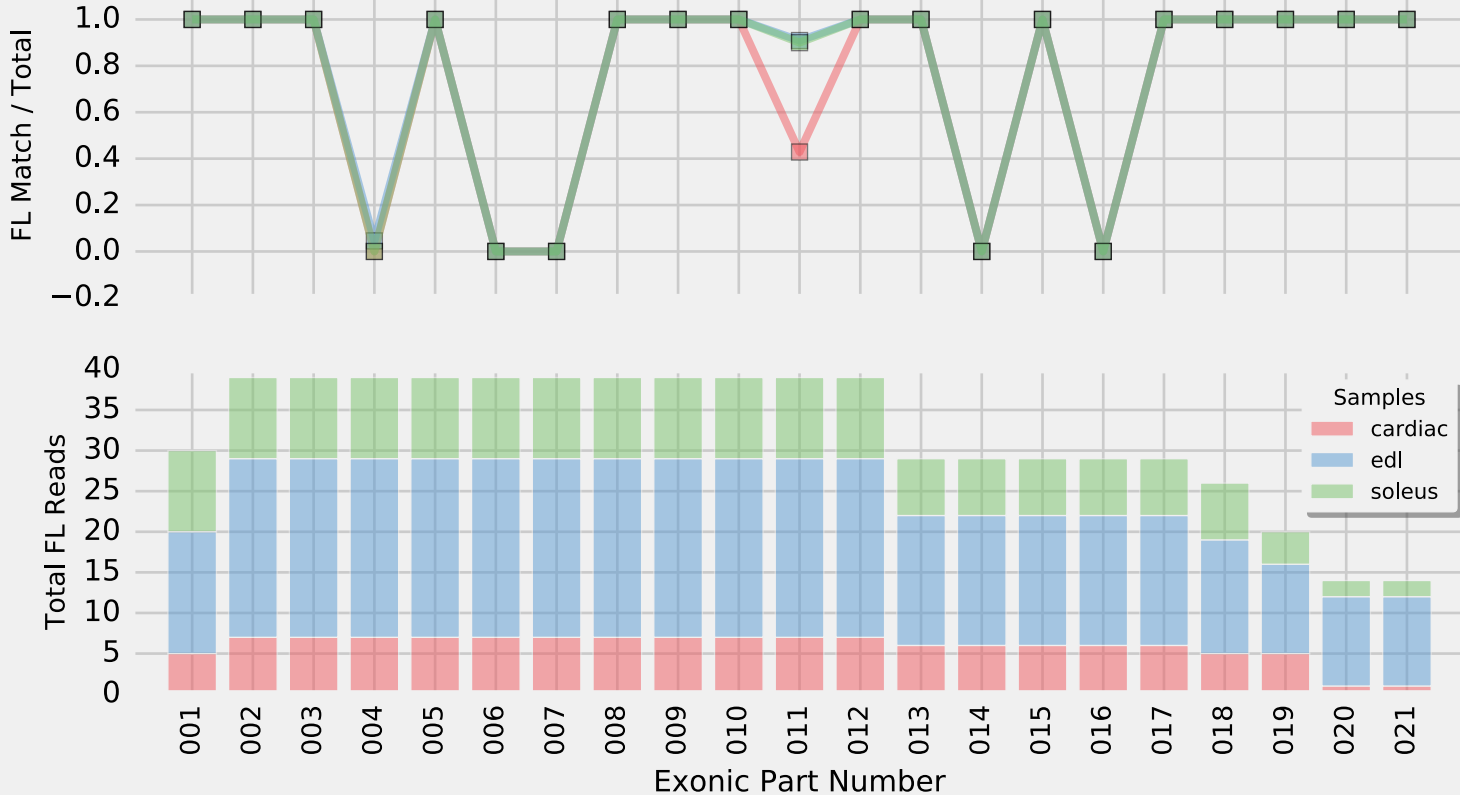

# Zfp568

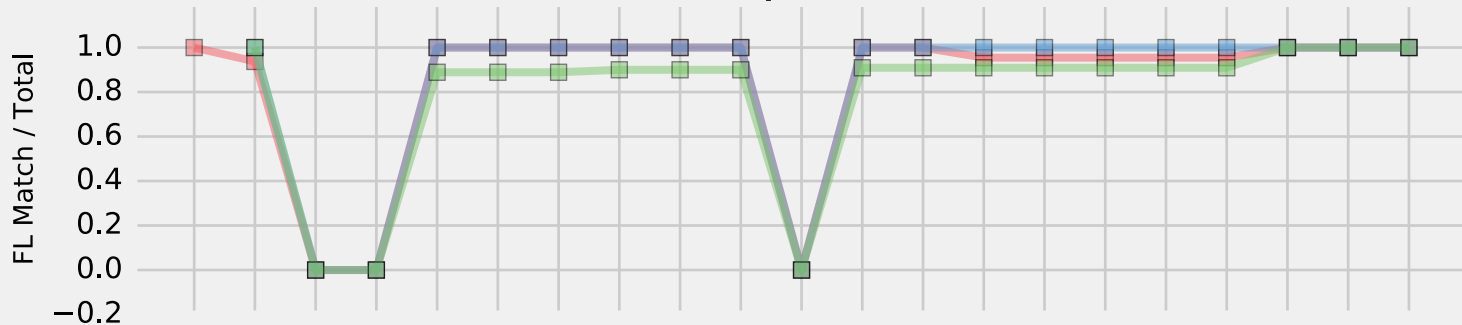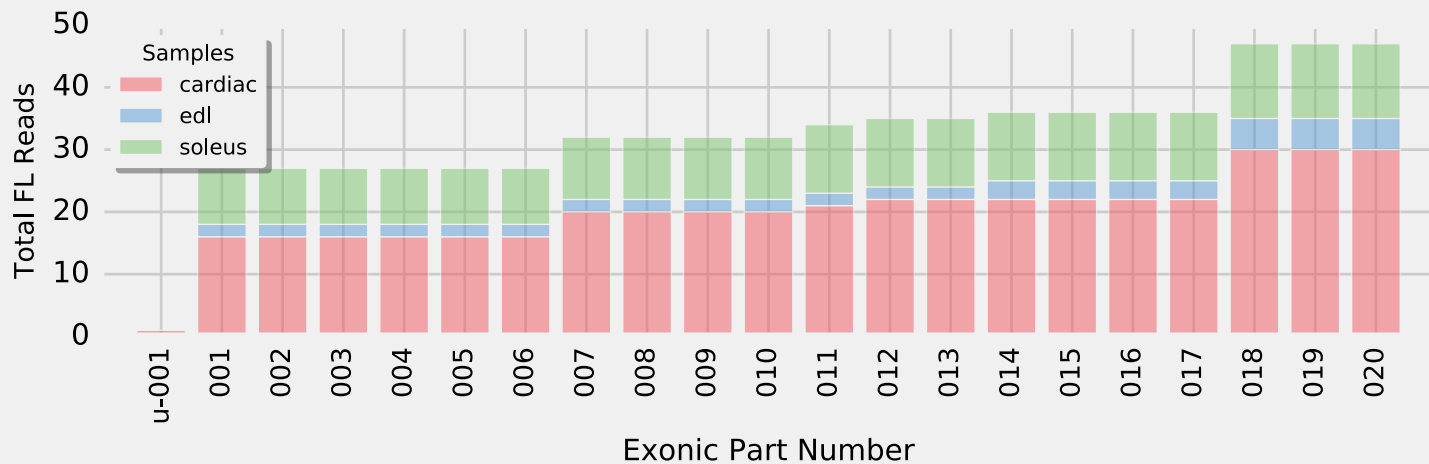

# Zfp597

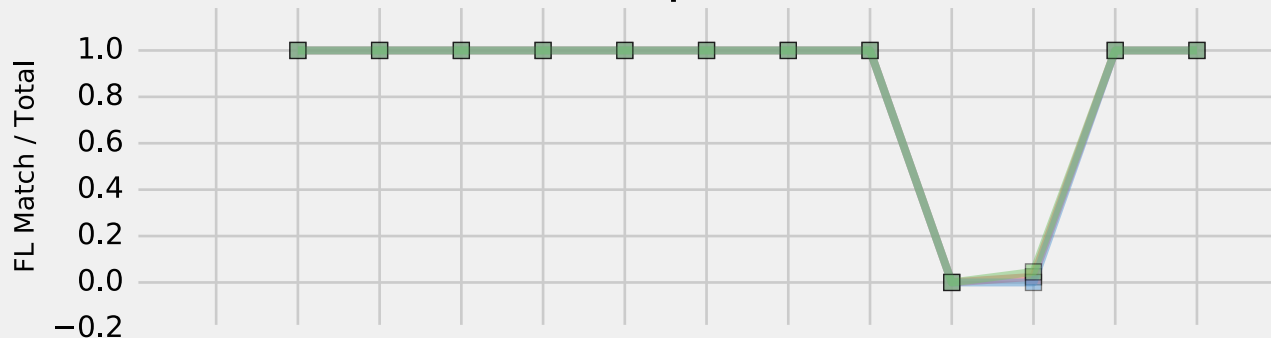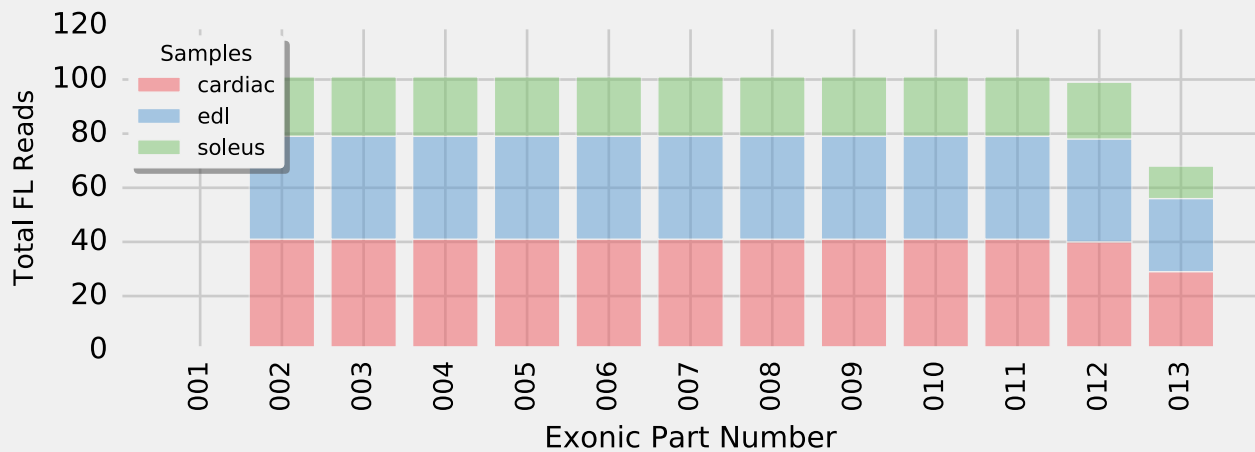

# Zfp638

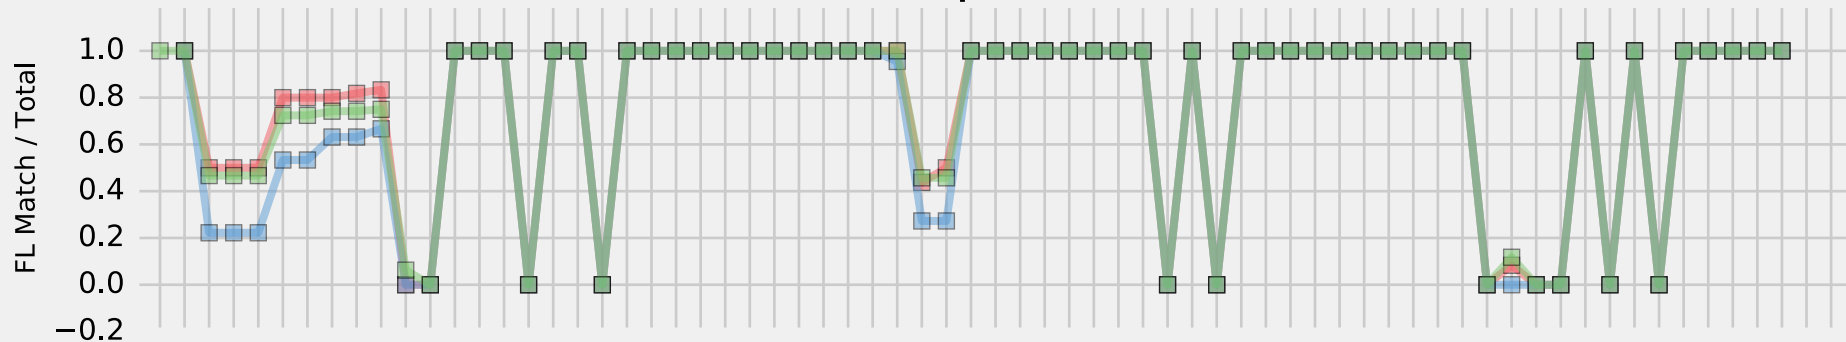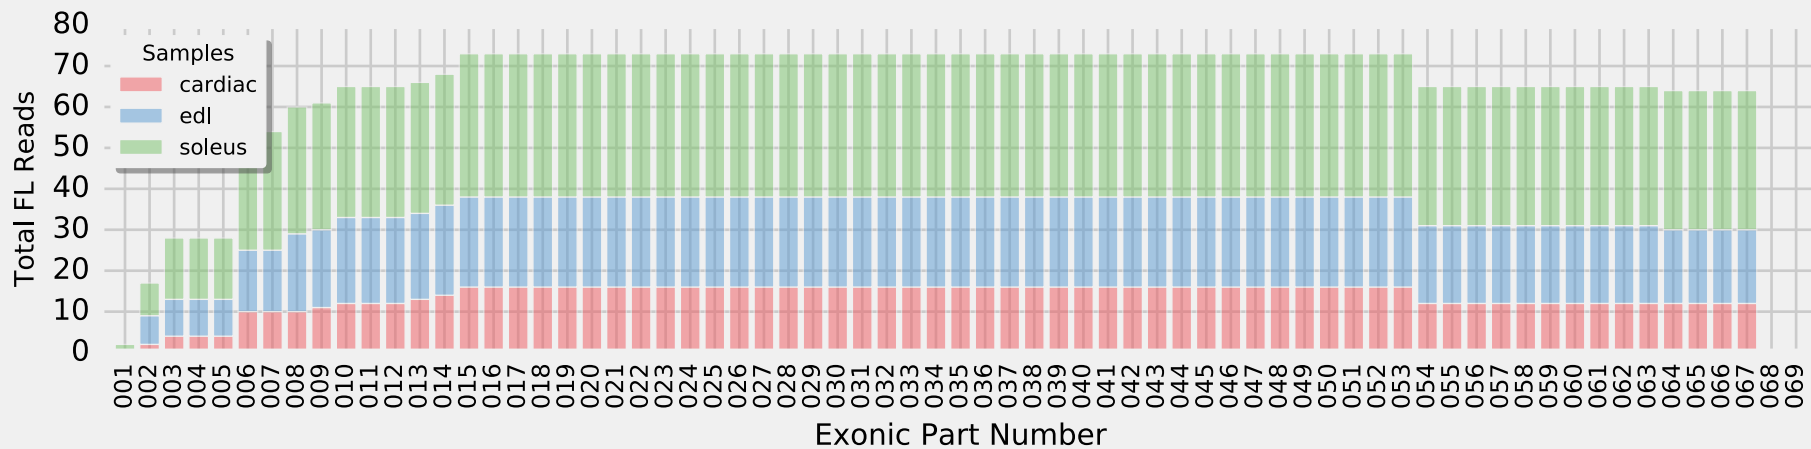

Zfx

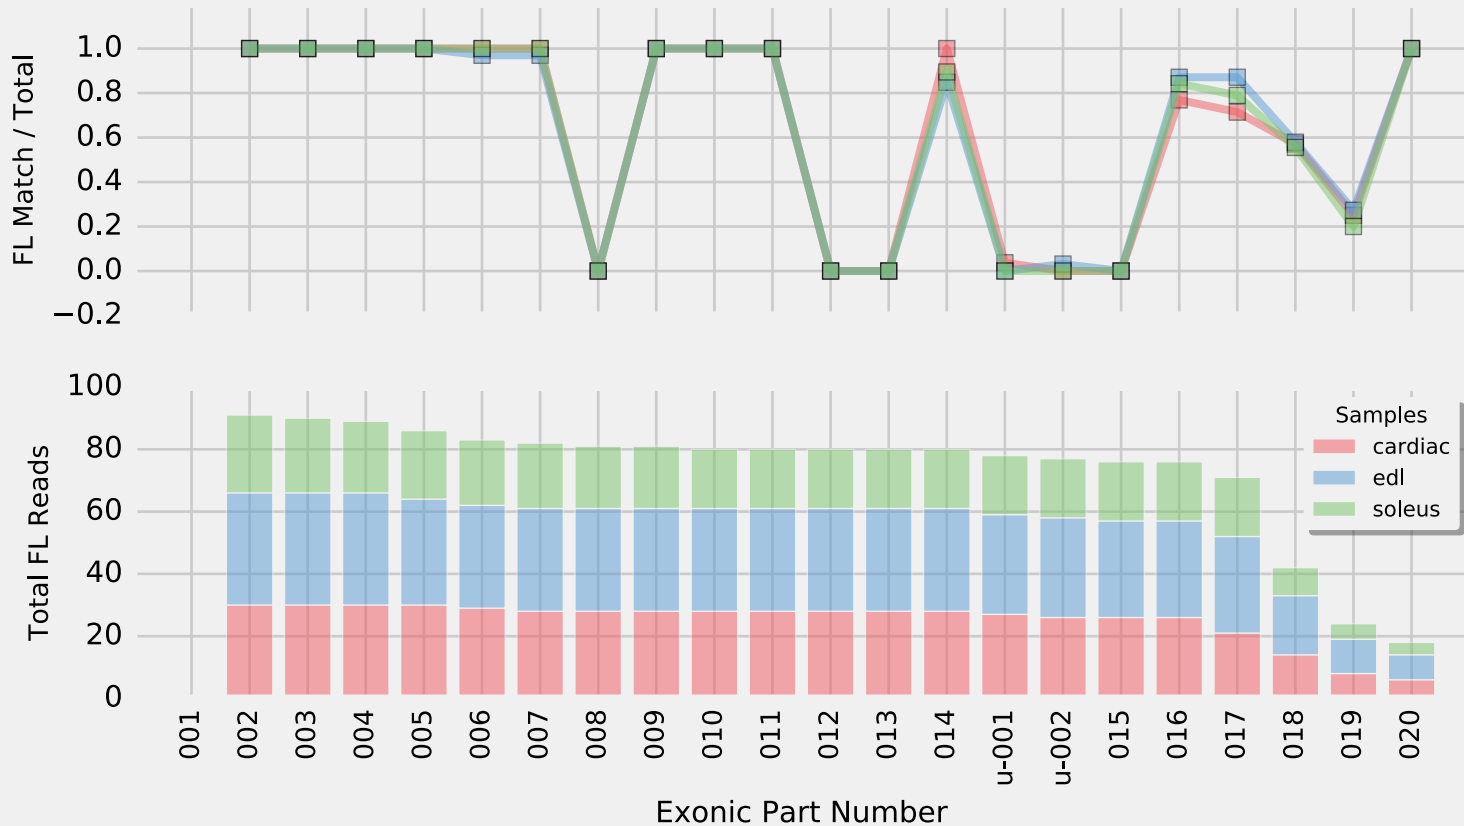

# Zfyve16

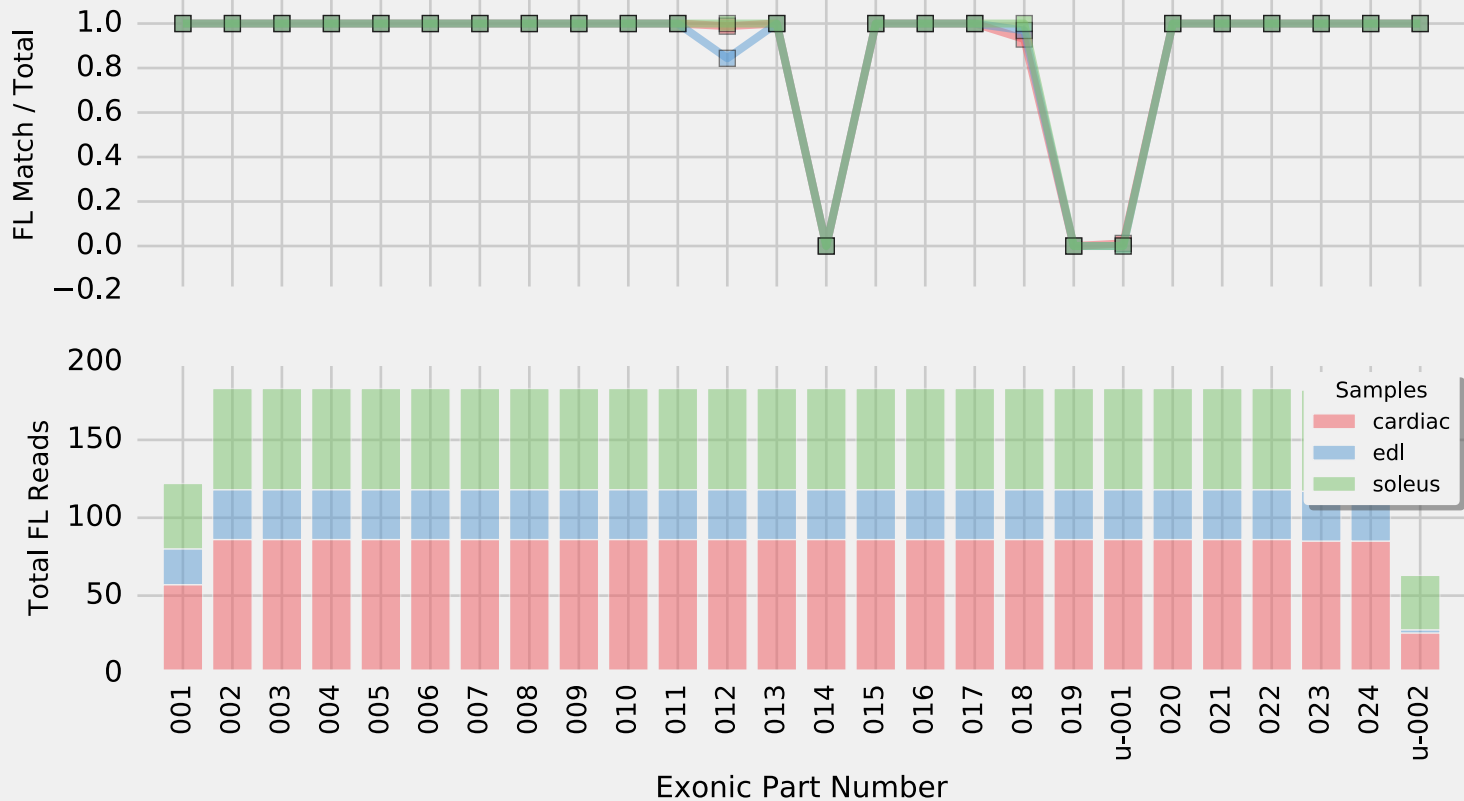



# Zfyve9

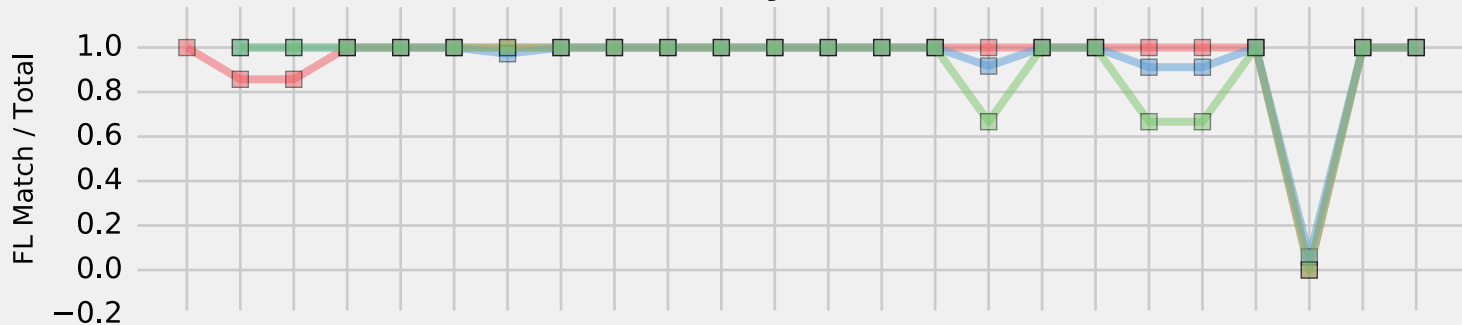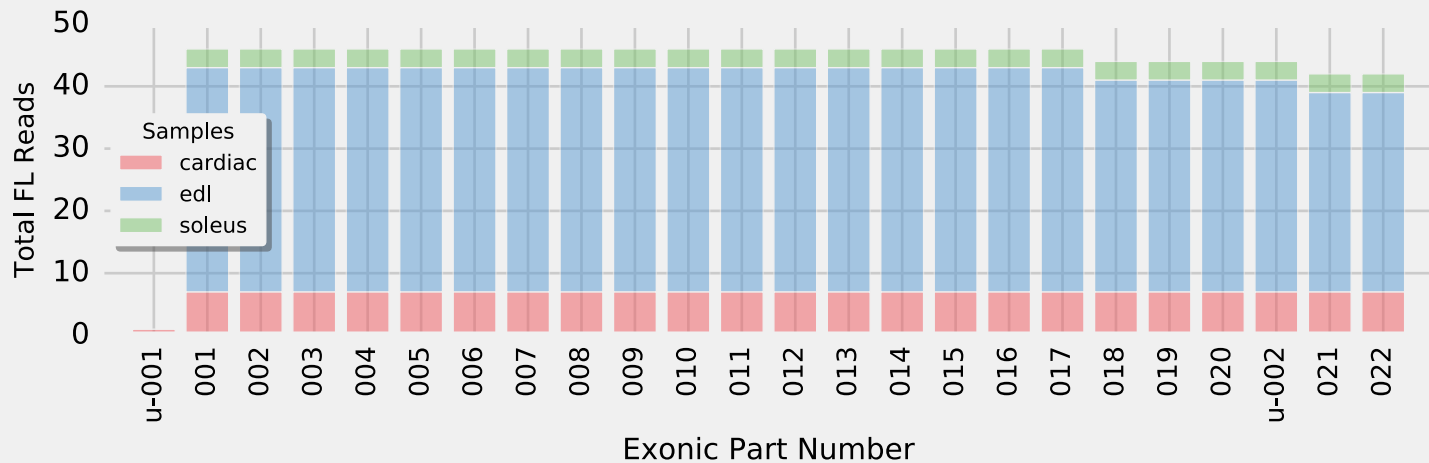

# Znfx1

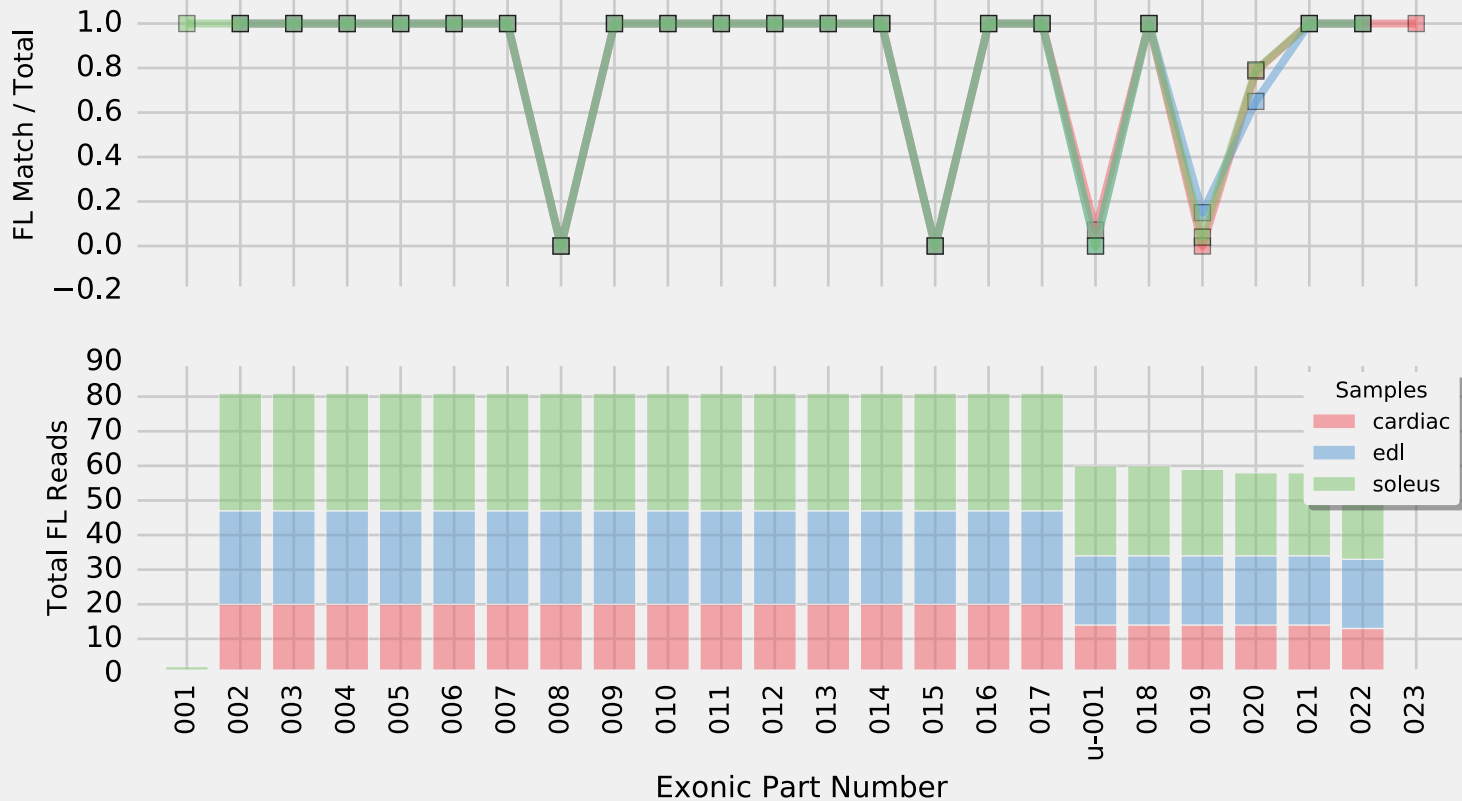

# Zyg11b

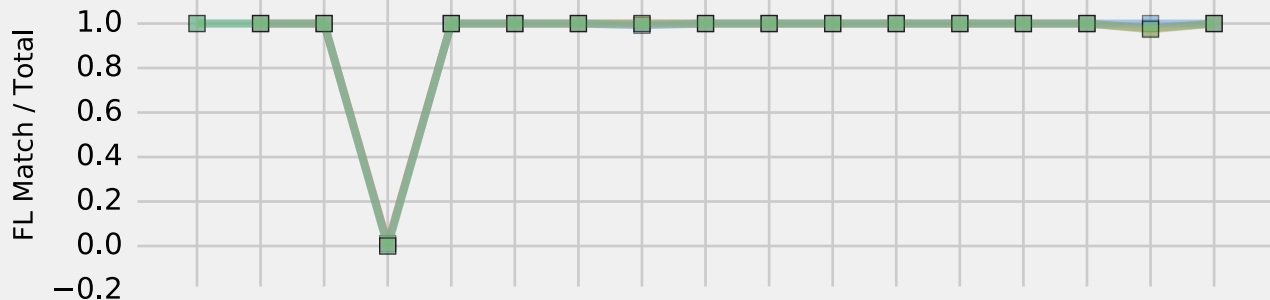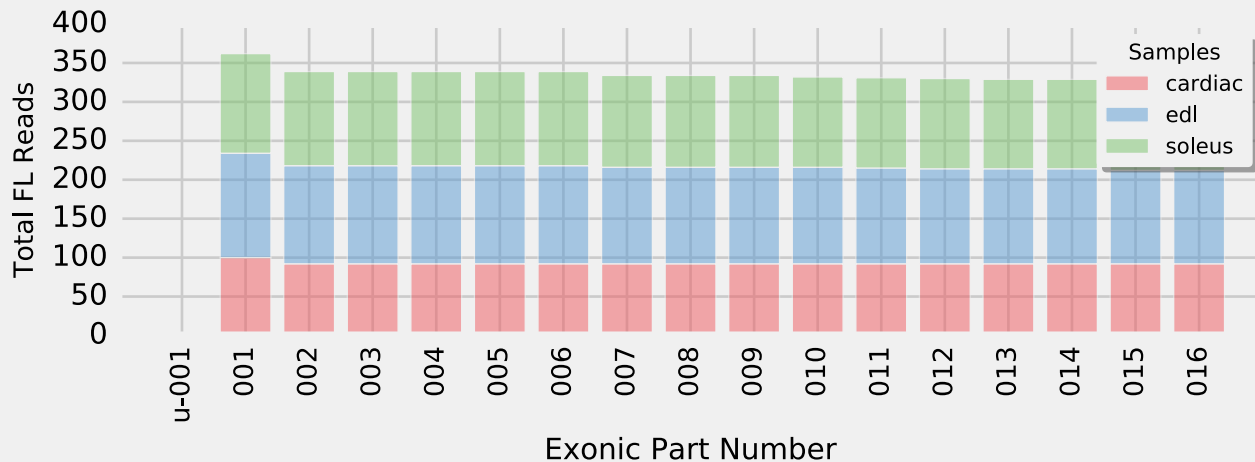

# mt-Co1

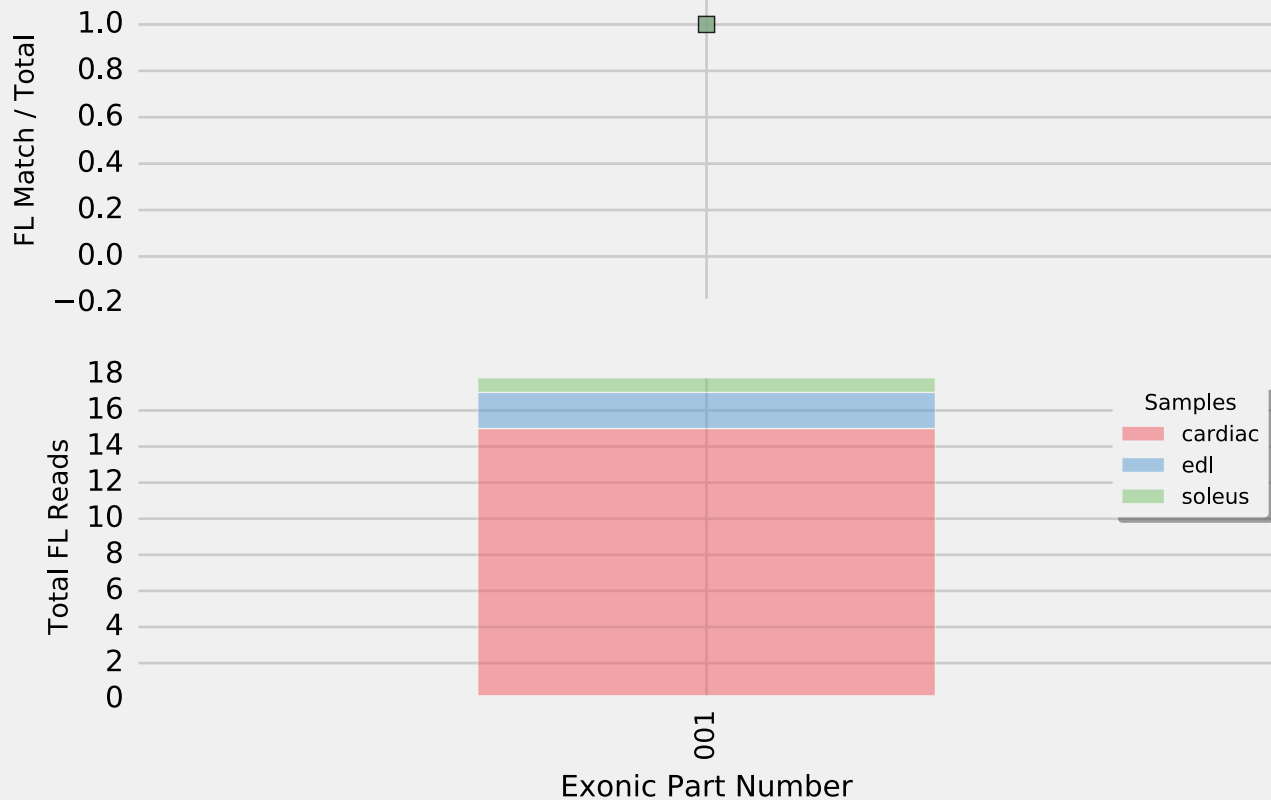

Supplement: Supplemental_Data.zip [file 686_genes_exon_ratios.pdf › Supplemental_Data/exCOVator_results/686_genes_exon_ratios.pdf]
