# Supplementary material for: A long-read RNA-seq approach to identify novel transcripts of very large genes
Source: HighWire-hosted journal article supplement (doi:10.1101/gr.259903.119), 2020-06-01
Supplement: Supplemental_Data.zip [file nrap_2-40_main_analysis.xlsx]

## Sheet: nrap_2-40_main_analysis
pattern_num	NM_008733_exon40	NM_008733_exon39	NM_008733_exon38	NM_008733_exon37	NM_008733_exon_17	NM_008733_exon12	NM_008733_exon2	transcript_ids	cardiac_flCount	edl_flCount	soleus_flCount
5	FALSE	FALSE	FALSE	FALSE	TRUE	FALSE	TRUE	ENSMUST00000167239.7	0	0	0
121	TRUE	TRUE	TRUE	TRUE	FALSE	FALSE	TRUE		0	0	1
123	TRUE	TRUE	TRUE	TRUE	FALSE	TRUE	TRUE	ENSMUST00000166203.1	0	0	0
124	TRUE	TRUE	TRUE	TRUE	TRUE	FALSE	FALSE	ENSMUST00000095947.10	14	0	26
125	TRUE	TRUE	TRUE	TRUE	TRUE	FALSE	TRUE	ENSMUST00000040711.14	541	280	2177
126	TRUE	TRUE	TRUE	TRUE	TRUE	TRUE	FALSE		0	0	5
127	TRUE	TRUE	TRUE	TRUE	TRUE	TRUE	TRUE	ENSMUST00000073536.12	0	557	335

## Sheet: Select >= 10 FL-reads
Cassette Exons							Gencode	Cardiac		EDL		Soleus
40	39	38	37	17	12	2	Transcript IDs	Read Count	% Total	Read Count	% Total	Read Count	% Total
FALSE	FALSE	FALSE	FALSE	TRUE	FALSE	TRUE	ENSMUST00000167239.7	0	0	0	0	0	0
TRUE	TRUE	TRUE	TRUE	FALSE	TRUE	TRUE	ENSMUST00000166203.1	0	0	0	0	0	0
TRUE	TRUE	TRUE	TRUE	TRUE	FALSE	FALSE	ENSMUST00000095947.10	14	0.0252252	0	0	26	0.0102443
TRUE	TRUE	TRUE	TRUE	TRUE	FALSE	TRUE	ENSMUST00000040711.14	541	0.974775	280	0.334528	2177	0.857762
TRUE	TRUE	TRUE	TRUE	TRUE	TRUE	TRUE	ENSMUST00000073536.12	0	0	557	0.665472	335	0.131994
							Total	555		837		2538
