# Supplementary material for: A long-read RNA-seq approach to identify novel transcripts of very large genes
Source: HighWire-hosted journal article supplement (doi:10.1101/gr.259903.119), 2020-06-01
Supplement: Supplemental_Data.zip [file ttn_10-14_main_analysis.xlsx]

## Sheet: 3M_ttn_10-14_main_analysis
pattern_num	NM_011652_exon14	NM_011652_exon13c	NM_011652_exon12c	NM_011652_exon11c	NM_011652_exon10	transcript_ids	cardiac_flCount		edl_flCount		soleus_flCount
0	FALSE	FALSE	FALSE	FALSE	FALSE	Artifacts	7	0.0196078	5	0.00397772	0	0
17	TRUE	FALSE	FALSE	FALSE	TRUE		36	0.10084	1226	0.975338	122	0.586538
19	TRUE	FALSE	FALSE	TRUE	TRUE		59	0.165266	0	0	0	0
21	TRUE	FALSE	TRUE	FALSE	TRUE	Likely Artifact, 4 FL reads have mismatchs on exon 12 in edl, 1 looks ok	0	0	5	0.00397772	2	0.00961538
25	TRUE	TRUE	FALSE	FALSE	TRUE	Likely Artifact, all 4 FL reads have mismatchs on exon 10 and 13	4	0.0112045	0	0	0	0
27	TRUE	TRUE	FALSE	TRUE	TRUE		218	0.610644	0	0	0	0
29	TRUE	TRUE	TRUE	FALSE	TRUE	ENSMUST00000011934.11, ENSMUST00000099980.9	10	0.0280112	21	0.0167064	84	0.403846
31	TRUE	TRUE	TRUE	TRUE	TRUE	ENSMUST00000099981.8, ENSMUST00000111882.8, ENSMUST00000111846.8	23	0.0644258	0	0	0	0
						total	357		1257		208

## Sheet: rm_artifacts
pattern_num	NM_011652_exon14	NM_011652_exon13c	NM_011652_exon12c	NM_011652_exon11c	NM_011652_exon10	transcript_ids	cardiac_flCount		edl_flCount		soleus_flCount
17	TRUE	FALSE	FALSE	FALSE	TRUE		36	0.104046	1226	0.98316	122	0.592233
19	TRUE	FALSE	FALSE	TRUE	TRUE		59	0.17052	0	0	0	0
27	TRUE	TRUE	FALSE	TRUE	TRUE		218	0.630058	0	0	0	0
29	TRUE	TRUE	TRUE	FALSE	TRUE	ENSMUST00000011934.11, ENSMUST00000099980.9	10	0.0289017	21	0.0168404	84	0.407767
31	TRUE	TRUE	TRUE	TRUE	TRUE	ENSMUST00000099981.8, ENSMUST00000111882.8, ENSMUST00000111846.8	23	0.066474	0	0	0	0
						total	346		1247		206
