# Supplementary material for: A long-read RNA-seq approach to identify novel transcripts of very large genes
Source: HighWire-hosted journal article supplement (doi:10.1101/gr.259903.119), 2020-06-01
Supplement: Supplemental_Data.zip [file ttn_45-50_vs_45-169_car_vs_sk.xlsx]

## Sheet: raw
pattern_num	NM_011652_exon50	NM_011652_exon49	NM_011652_exon48	NM_011652_exon47	NM_011652_exon46	NM_028004_exon45_3prime_50bp	transcript_ids	cardiac_flCount	edl_flCount	soleus_flCount
0	FALSE	FALSE	FALSE	FALSE	FALSE	FALSE		0	5	1
2	FALSE	FALSE	FALSE	FALSE	TRUE	FALSE		1	0	0
3	FALSE	FALSE	FALSE	FALSE	TRUE	TRUE	ENSMUST00000011934.11	202	0	0
7	FALSE	FALSE	FALSE	TRUE	TRUE	TRUE		4	0	0
62	TRUE	TRUE	TRUE	TRUE	TRUE	FALSE	ENSMUST00000111882.8, ENSMUST00000111846.8, ENSMUST00000134720.7	0	160	19
63	TRUE	TRUE	TRUE	TRUE	TRUE	TRUE	ENSMUST00000099981.8	0	0	0
pattern_num	NM_011652_exon169_25bp_5prime	NM_011652_exon168	NM_011652_exon167	NM_011652_exon47	NM_011652_exon46	NM_028004_exon45_3prime_50bp	transcript_ids	cardiac_flCount	edl_flCount	soleus_flCount
0	FALSE	FALSE	FALSE	FALSE	FALSE	FALSE		0	1	1
50	TRUE	TRUE	FALSE	FALSE	TRUE	FALSE		1	0	0
51	TRUE	TRUE	FALSE	FALSE	TRUE	TRUE	ENSMUST00000011934.11	190	0	0
59	TRUE	TRUE	TRUE	FALSE	TRUE	TRUE		1	0	0
62	TRUE	TRUE	TRUE	TRUE	TRUE	FALSE	ENSMUST00000111882.8, ENSMUST00000111846.8, ENSMUST00000134720.7	0	0	0
63	TRUE	TRUE	TRUE	TRUE	TRUE	TRUE	ENSMUST00000099981.8	0	0	0

## Sheet: percentages
Skeletal
pattern_num	exon50	exon49	exon48	exon47	exon46	exon45_3'50bp	transcript_ids	cardiac_flCount		edl_flCount		soleus_flCount
0	FALSE	FALSE	FALSE	FALSE	FALSE	FALSE	Likely artifact	0	0	5	0.030303	1	0.05
2	FALSE	FALSE	FALSE	FALSE	TRUE	FALSE	Likely artifact	1	0.00483092	0	0	0	0
3	FALSE	FALSE	FALSE	FALSE	TRUE	TRUE	ENSMUST00000011934.11	202	0.975845	0	0	0	0
7	FALSE	FALSE	FALSE	TRUE	TRUE	TRUE	Likely artifact	4	0.0193237	0	0	0	0
62	TRUE	TRUE	TRUE	TRUE	TRUE	FALSE	ENSMUST00000111882.8, ENSMUST00000111846.8, ENSMUST00000134720.7	0	0	160	0.969697	19	0.95
63	TRUE	TRUE	TRUE	TRUE	TRUE	TRUE	ENSMUST00000099981.8	0	0	0	0	0	0
							Total	207		165		20
Cardio
pattern_num	exon169_5'25bp	exon168	exon167	exon47	exon46	exon45_3'50bp	transcript_ids	cardiac_flCount		edl_flCount		soleus_flCount
0	FALSE	FALSE	FALSE	FALSE	FALSE	FALSE	Likely artifact	0	0	1	1	1	1
50	TRUE	TRUE	FALSE	FALSE	TRUE	FALSE	Likely artifact	1	0.00520833	0	0	0	0
51	TRUE	TRUE	FALSE	FALSE	TRUE	TRUE	ENSMUST00000011934.11	190	0.989583	0	0	0	0
59	TRUE	TRUE	TRUE	FALSE	TRUE	TRUE	Likely artifact	1	0.00520833	0	0	0	0
62	TRUE	TRUE	TRUE	TRUE	TRUE	FALSE	ENSMUST00000111882.8, ENSMUST00000111846.8, ENSMUST00000134720.7	0	0	0	0	0	0
63	TRUE	TRUE	TRUE	TRUE	TRUE	TRUE	ENSMUST00000099981.8	0	0	0	0	0	0
							Total	192		1		1

## Sheet: rm_artifacts
Skeletal
pattern_num	exon50	exon49	exon48	exon47	exon46	exon45_3'50bp	transcript_ids	cardiac_flCount		edl_flCount		soleus_flCount
3	FALSE	FALSE	FALSE	FALSE	TRUE	TRUE	ENSMUST00000011934.11	202	1	0	0	0	0
62	TRUE	TRUE	TRUE	TRUE	TRUE	FALSE	ENSMUST00000111882.8, ENSMUST00000111846.8, ENSMUST00000134720.7	0	0	160	1	19	1
63	TRUE	TRUE	TRUE	TRUE	TRUE	TRUE	ENSMUST00000099981.8	0	0	0	0	0	0
							Total	202		160		19
Cardio
pattern_num	exon169_5'25bp	exon168	exon167	exon47	exon46	exon45_3'50bp	transcript_ids	cardiac_flCount		edl_flCount		soleus_flCount
51	TRUE	TRUE	FALSE	FALSE	TRUE	TRUE	ENSMUST00000011934.11	190	1	0	0	0	0
62	TRUE	TRUE	TRUE	TRUE	TRUE	FALSE	ENSMUST00000111882.8, ENSMUST00000111846.8, ENSMUST00000134720.7	0	0	0	0	0	0
63	TRUE	TRUE	TRUE	TRUE	TRUE	TRUE	ENSMUST00000099981.8	0	0	0	0	0	0
							Total	190		0		0
