# Supplementary material for: A long-read RNA-seq approach to identify novel transcripts of very large genes
Source: HighWire-hosted journal article supplement (doi:10.1101/gr.259903.119), 2020-06-01
Supplement: Supplemental_Data.zip [file ttn_191_main_analysis.xlsx]

## Sheet: 3M_ttn_191c_main_analysis
Exons			Gencode	Cardiac		EDL		Soleus
192	191	190	Transcript IDs	Read Count	% Total	Read Count	% Total	Read Count	% Total
FALSE	FALSE	FALSE	Likely Artifact	0	0	3	0.0105263	1	0.0454545
TRUE	FALSE	TRUE		134	0.676768	0	0	0	0
TRUE	TRUE	FALSE	Likely Artifact	0	0	1	0.00350877	0	0
TRUE	TRUE	TRUE	ENSMUST00000011934.11, ENSMUST00000099981.8, ENSMUST00000111882.8, ENSMUST00000111846.8	64	0.323232	281	0.985965	21	0.954545
			Total	198		285		22

## Sheet: rm_artifacts
Exons			Gencode	Cardiac		EDL		Soleus
192	191	190	Transcript IDs	Read Count	% Total	Read Count	% Total	Read Count	% Total
TRUE	FALSE	TRUE		134	0.676768	0	0	0	0
TRUE	TRUE	TRUE	ENSMUST00000011934.11, ENSMUST00000099981.8, ENSMUST00000111882.8, ENSMUST00000111846.8	64	0.323232	281	1	21	1
			Total	198		281		21
