# Supplementary material for: A long-read RNA-seq approach to identify novel transcripts of very large genes
Source: HighWire-hosted journal article supplement (doi:10.1101/gr.259903.119), 2020-06-01
Supplement: Supplemental_Data.zip [file ttn_312_main_analysis.xlsx]

## Sheet: raw
pattern_num	NM_011652_exon313_noUtr	NM_011652_exon312c	NM_011652_exon311	transcript_ids	cardiac_flCount	edl_flCount	soleus_flCount
5	TRUE	FALSE	TRUE		0	249	25
7	TRUE	TRUE	TRUE	ENSMUST00000011934.11, ENSMUST00000099981.8, ENSMUST00000111882.8, ENSMUST00000111846.8	375	748	2036

## Sheet: 3M_ttn_312_main_analysis
Exons			Gencode	Cardiac		EDL		Soleus
313_noUtr	312	311	Transcript IDs	Read Count	% Total	Read Count	% Total	Read Count	% Total
TRUE	FALSE	TRUE	UNANNOTATED	0	0	249	0.249749	25	0.01213
TRUE	TRUE	TRUE	ENSMUST00000011934.11, ENSMUST00000099981.8, ENSMUST00000111882.8, ENSMUST00000111846.8	375	1	748	0.750251	2036	0.98787
			Total	375		997		2061
