# Supplementary material for: A long-read RNA-seq approach to identify novel transcripts of very large genes
Source: HighWire-hosted journal article supplement (doi:10.1101/gr.259903.119), 2020-06-01
Supplement: Supplemental_Data.zip [file ttn_alt3prime45_44_main_analysis.xlsx]

## Sheet: raw
pattern_num	ENSMUST00000099980_exon45_50bp_5prime	NM_028004_exon44	transcript_ids	cardiac_flCount	edl_flCount	soleus_flCount
0	FALSE	FALSE		0	5	1
1	FALSE	TRUE	ENSMUST00000011934.11, ENSMUST00000099981.8, ENSMUST00000111882.8, ENSMUST00000111846.8, ENSMUST00000134720.7	187	167	20
3	TRUE	TRUE	ENSMUST00000099980.9	7	27	11

## Sheet: ttn_alt3prime45_44
pattern_num	ENSMUST00000099980_exon45_50bp_5prime	NM_028004_exon44	transcript_ids	cardiac_flCount		edl_flCount		soleus_flCount
0	FALSE	FALSE		0	0	5	0.0251256	1	0.03125
1	FALSE	TRUE	ENSMUST00000011934.11, ENSMUST00000099981.8, ENSMUST00000111882.8, ENSMUST00000111846.8, ENSMUST00000134720.7	187	0.963918	167	0.839196	20	0.625
3	TRUE	TRUE	ENSMUST00000099980.9	7	0.0360825	27	0.135678	11	0.34375
				194		199		32

## Sheet: Select >= 10 FL reads
pattern_num	ENSMUST00000099980_exon45_50bp_5prime	NM_028004_exon44	transcript_ids	cardiac_flCount	%	edl_flCount	%	soleus_flCount	%
1	FALSE	TRUE	ENSMUST00000011934.11, ENSMUST00000099981.8, ENSMUST00000111882.8, ENSMUST00000111846.8, ENSMUST00000134720.7	187	0.963918	167	0.860825	20	0.645161
3	TRUE	TRUE	ENSMUST00000099980.9	7	0.0360825	27	0.139175	11	0.354839
				194		194		31
